# Supplementary material for: Genetic mapping of etiologic brain cell types for obesity
Source: eLife. 2020 Sep 21;9:e55851. doi: 10.7554/eLife.55851 (PMC7505664; doi:10.7554/eLife.55851)
Supplement: Figure 2—source data 1. [file elife-55851-fig2-data1.xlsx]

## Sheet: 1 - GWAS summary stats
Trait category		Trait name		Study reference		Study information					Prevalence (case/control only)
GWAS trait representative	Trait category	Trait full name	Trait abbreviation	Author	Year	GWAS violates LDSC assumptions	Ancestry	Custom array in cohort	N	Neff	Population prevalence	Sample prevalence
TRUE	neurological	Alzheimer's Disease	AD	Jansen	2019		EUR	NO	455258
TRUE	neuropsychiatric	Attention Deficit Hyperactivity Disorder	ADHD	Demontis	2017		EUR	NO	53293
TRUE	neuropsychiatric	Anorexia Nervosa	AN	Duncan	2017		EUR	NO	14477
TRUE	neuropsychiatric	Autism Spectrum Disorder	ASD	Grove	2018		EUR	NO	46350
TRUE	neuropsychiatric	Bipolar Disorder	BIP	PGC	2018		EUR	NO	41653
FALSE	anthropometric	BMI	BMI	Locke	2015	TRUE	EUR	Metabochip	322154
TRUE	anthropometric	BMI	BMI	Loh	2018		EUR	NO	457824	532396
FALSE	anthropometric	BMI	BMI	Yengo	2018	TRUE	EUR	Metabochip	681275
TRUE	cardivascular	Coronary Artery Disease	CAD	Schunkert	2011		EUR	NO	86995
TRUE	cardivascular	Cardiovascular Diseases	CV	Loh	2018		EUR	NO	459324	477807
TRUE	Immune	Celiac Disease	CELIAC	Dubois	2010		EUR	NO	15283
TRUE	Immune	Crohn's Disease	CROHNS	Jostins	2012		EUR	NO	20883
FALSE	behavioral	Depressed Affect	DEP_AFFECT	Nagel	2018		EUR	NO	357957
TRUE	behavioral	Depression	DEP	Nagel	2018		EUR	NO	381455
TRUE	cardivascular	Diastolic Blood Pressure (adj. medicine)	BP_DIA	Loh	2018		EUR	NO	422771	490470
FALSE	behavioral	Depressive Symptoms	DS	Okbay	2016		EUR	NO	161460
FALSE	behavioral	Educational Attainment	EA2	Okbay	2016		EUR	NO	217568
TRUE	behavioral	Educational Attainment	EA3	Lee	2018		EUR	NO	766345
TRUE	metabolic	Fasting Glucose (female)	FG_F	Lagou	2018	TRUE	EUR and non-EUR	Metabochip	73089
TRUE	metabolic	Fasting Insulin (female)	FI_F	Lagou	2018	TRUE	EUR and non-EUR	Metabochip	50404
TRUE	metabolic	HbA1c	HBA1C	Wheeler	2017	TRUE	EUR	Metabochip	123665
TRUE	anthropometric	Height	HEIGHT	Loh	2018		EUR	NO	458303	673879
FALSE	anthropometric	Height	HEIGHT	Yengo	2018		EUR	NO	693529
TRUE	Immune	Inflammatory Bowel Disease	IBD	Jostins	2012		EUR	NO	34652
TRUE	behavioral	Insomnia	INS	Jansen	2018		EUR	NO	386533		0.20	0.28
TRUE	behavioral	Intelligence	INT	Savage	2018		EUR	NO	269867
FALSE	behavioral	Intelligence	INT	Sniekers	2017		EUR	NO	78308
TRUE	lipids	High Density Lipoprotein	HDL	Teslovich	2010		EUR	NO	99900
TRUE	lipids	Low Density Lipoprotein	LDL	Teslovich	2010		EUR	NO	95454
TRUE	lipids	Triglycerides	TG	Teslovich	2010		EUR	NO	96598
TRUE	Immune	Systemic Lupus Erythematosus	LUPUS	Bentham	2015		EUR	NO	14267
TRUE	neuropsychiatric	Major Depression Disorder	MDD	Howard	2019		EUR	NO	500199
FALSE	neuropsychiatric	Major Depression Disorder	MDD	Wray	2018		EUR	NO	153780
TRUE	neurological	Multiple Sclerosis	MS	Patsopoulos	2011		EUR	NO	17698		0.001	0.31
TRUE	behavioral	Neuroticism	NEU	Nagel	2018		EUR	NO	390278
FALSE	behavioral	Neuroticism	NEU	Okbay	2016		EUR	NO	170911
TRUE	Immune	Primary Biliary Cirrhosis	PBC	Cordell	2015		EUR	NO	13239
TRUE	Immune	Rheumatoid Arthritis	RA	Okada	2014		EUR	NO	38242		0.01	0.29
TRUE	behavioral	Risk Tolerance	RB	Linner	2019		EUR	NO	466571
FALSE	neuropsychiatric	Schizophrenia	SCZ	Ripke	2014		EUR	NO	77096
TRUE	neuropsychiatric	Schizophrenia	SCZ	Pardinas	2018		EUR	NO	105318		0.01	0.39
TRUE	behavioral	Subjective Well Being	SWB	Okbay	2016		EUR	NO	298420
TRUE	cardivascular	Systolic Blood Pressure (adj. medicine)	BP_SYS	Loh	2018		EUR	NO	422771	469767
TRUE	metabolic	Type 1 Diabetes	T1D	Bradfield	2011		EUR	NO	26890
FALSE	metabolic	Type 2 Diabetes	T2D	Mahajan	2018	TRUE	EUR	Metabochip	898130
TRUE	metabolic	Type 2 Diabetes	T2D	Loh	2018		EUR	NO	459324	468298
TRUE	Immune	Ulcerative Colitis	UC	Jostins	2012		EUR	NO	27432
TRUE	anthropometric	Waist-hip Ratio	WHR	Pulit	2019	TRUE	EUR	Metabochip	697734
FALSE	anthropometric	Waist-hip Ratio (adj. BMI)	WHRadjBMI	Pulit	2019	TRUE	EUR	Metabochip	694649
TRUE	anthropometric	Waist-hip Ratio (adj. BMI)	WHRadjBMI	Loh	2018		EUR	NO	458417	502773
TRUE	behavioral	Worry	WORRY	Nagel	2018		EUR	NO	348219
