# Supplementary material for: Genetic mapping of etiologic brain cell types for obesity
Source: eLife. 2020 Sep 21;9:e55851. doi: 10.7554/eLife.55851 (PMC7505664; doi:10.7554/eLife.55851)
Supplement: Figure 2—source data 2. [file elife-55851-fig2-data2.xlsx]

## Sheet: 2 - TM metadata
Tabula Muris metadata
Annotation	Tissue	Cell type	Ncells	No. ES genes DET	No. ES genes GES	No. ES genes NSI	No. ES genes EP	No. ES genes ESmu
Bladder - bladder cell	Bladder	bladder cell	695	3788	4166	1386	1949	4728
Bladder - bladder urothelial cell	Bladder	bladder urothelial cell	683	4417	5450	1223	1697	5977
Brain - macrophage	Brain	macrophage	61	1544	1066	443	1064	1817
Brain - microglial cell	Brain	microglial cell	4394	2266	1805	1066	2238	3011
Brain - astrocyte	Brain	astrocyte	432	2945	2383	1741	2775	3607
Brain - Bergmann glial cell	Brain	Bergmann glial cell	40	2023	1668	742	1570	2336
Brain - brain pericyte	Brain	brain pericyte	156	2962	2145	777	1377	3334
Brain - endothelial cell	Brain	endothelial cell	715	2696	1841	1231	1696	3359
Brain - neuron	Brain	neuron	281	6272	5771	1624	3309	6730
Brain - oligodendrocyte	Brain	oligodendrocyte	1574	3289	3092	1740	2539	4117
Brain - oligodendrocyte precursor cell	Brain	oligodendrocyte precursor cell	203	5469	4666	1312	2700	5811
Fat - B cell	Fat	B cell	519	1317	658	910	1189	1839
Fat - endothelial cell	Fat	endothelial cell	668	1936	1337	1311	1678	2690
Fat - mesenchymal stem cell of adipose	Fat	mesenchymal stem cell of adipose	2107	3948	4086	1425	2225	4762
Fat - myeloid cell	Fat	myeloid cell	1123	2199	1831	1087	1597	2949
Fat - natural killer cell	Fat	natural killer cell	95	1127	506	531	580	1305
Fat - T cell	Fat	T cell	353	1668	990	853	1275	2151
Fat - unknown cell type	Fat	unknown cell type	102	2620	1723	671	1310	3028
Heart - cardiac muscle cell	Heart	cardiac muscle cell	133	2108	2352	814	1734	2738
Heart - endocardial cell	Heart	endocardial cell	165	2621	1520	870	1304	2890
Heart - endothelial cell	Heart	endothelial cell	1365	1980	1382	1284	1627	2885
Heart - erythrocyte	Heart	erythrocyte	91	1246	1488	1153	3821	3833
Heart - fibroblast	Heart	fibroblast	2189	3584	2876	1490	2323	4397
Heart - leukocyte	Heart	leukocyte	523	2094	1565	952	1311	2662
Heart - myofibroblast cell	Heart	myofibroblast cell	178	2670	1439	1000	1537	2991
Heart - professional antigen presenting cell	Heart	professional antigen presenting cell	59	2075	2321	522	1580	2996
Heart - smooth muscle cell	Heart	smooth muscle cell	42	1904	1143	578	1091	2073
Heart - unknown cell type	Heart	unknown cell type	28	1521	920	567	1268	1741
Kidney - endothelial cell	Kidney	endothelial cell	126	1630	918	803	1398	2039
Kidney - epithelial cell of proximal tubule	Kidney	epithelial cell of proximal tubule	219	1271	863	1371	1748	2045
Kidney - kidney collecting duct epithelial cell	Kidney	kidney collecting duct epithelial cell	121	1075	572	1068	1606	1831
Kidney - leukocyte	Kidney	leukocyte	16	1125	496	280	705	1283
Kidney - macrophage	Kidney	macrophage	37	1003	588	468	824	1258
Large Intestine - Brush cell of epithelium proper of large intestine	Large Intestine	Brush cell of epithelium proper of large intestine	63	1031	1219	716	2136	2263
Large Intestine - enterocyte of epithelium of large intestine	Large Intestine	enterocyte of epithelium of large intestine	964	2771	3372	1845	2793	4019
Large Intestine - enteroendocrine cell	Large Intestine	enteroendocrine cell	59	1399	1551	656	1955	2187
Large Intestine - epithelial cell of large intestine	Large Intestine	epithelial cell of large intestine	2019	4281	5649	1569	3171	6280
Large Intestine - large intestine goblet cell	Large Intestine	large intestine goblet cell	833	3784	4914	1533	2429	5562
Limb Muscle - B cell	Limb Muscle	B cell	71	1285	517	527	895	1536
Limb Muscle - endothelial cell	Limb Muscle	endothelial cell	219	1554	1049	1177	1561	2148
Limb Muscle - lymphocyte	Limb Muscle	lymphocyte	81	1400	559	558	802	1641
Limb Muscle - macrophage	Limb Muscle	macrophage	76	1091	818	547	837	1390
Limb Muscle - mesenchymal stem cell	Limb Muscle	mesenchymal stem cell	499	2327	2046	1548	1818	3049
Limb Muscle - skeletal muscle satellite cell	Limb Muscle	skeletal muscle satellite cell	540	2313	1595	1464	2022	3070
Limb Muscle - skeletal muscle satellite stem cell	Limb Muscle	skeletal muscle satellite stem cell	439	1507	788	1284	1517	2280
Limb Muscle - T cell	Limb Muscle	T cell	35	1210	443	312	390	1312
Liver - B cell	Liver	B cell	41	1058	523	349	614	1231
Liver - endothelial cell of hepatic sinusoid	Liver	endothelial cell of hepatic sinusoid	182	2007	1326	1103	1530	2387
Liver - hepatocyte	Liver	hepatocyte	391	1685	2419	1461	1641	2762
Liver - Kupffer cell	Liver	Kupffer cell	61	870	579	655	922	1215
Liver - natural killer cell	Liver	natural killer cell	39	1808	1014	347	711	1969
Lung - B cell	Lung	B cell	57	1081	529	514	939	1381
Lung - ciliated columnar cell of tracheobronchial tree	Lung	ciliated columnar cell of tracheobronchial tree	25	2473	1937	531	1189	2708
Lung - classical monocyte	Lung	classical monocyte	90	1620	958	389	594	1780
Lung - epithelial cell of lung	Lung	epithelial cell of lung	113	1651	1435	791	1331	2049
Lung - leukocyte	Lung	leukocyte	35	841	431	863	934	1150
Lung - lung endothelial cell	Lung	lung endothelial cell	693	2343	1305	1215	1615	2870
Lung - monocyte	Lung	monocyte	65	1396	904	603	1045	1630
Lung - myeloid cell	Lung	myeloid cell	85	1668	927	371	596	1862
Lung - natural killer cell	Lung	natural killer cell	37	1191	641	348	756	1377
Lung - stromal cell	Lung	stromal cell	423	3019	2311	1352	2111	3522
Lung - T cell	Lung	T cell	53	1339	613	392	672	1518
Lung - unknown cell type	Lung	unknown cell type	40	574	401	550	1303	1387
Mammary Gland - basal cell	Mammary Gland	basal cell	1340	4269	4365	1595	2514	5169
Mammary Gland - endothelial cell	Mammary Gland	endothelial cell	47	1224	703	621	996	1494
Mammary Gland - luminal epithelial cell of mammary gland	Mammary Gland	luminal epithelial cell of mammary gland	578	4050	3905	1292	1858	4800
Mammary Gland - stromal cell	Mammary Gland	stromal cell	440	2697	2044	1342	1609	3217
Marrow - B cell	Marrow	B cell	44	2103	1285	216	422	2360
Marrow - basophil	Marrow	basophil	25	1842	1421	240	571	2168
Marrow - common lymphoid progenitor	Marrow	common lymphoid progenitor	156	5697	5932	648	1922	6384
Marrow - granulocyte	Marrow	granulocyte	761	1483	1287	2008	1989	2810
Marrow - granulocyte monocyte progenitor cell	Marrow	granulocyte monocyte progenitor cell	134	4055	4436	508	1253	4990
Marrow - granulocytopoietic cell	Marrow	granulocytopoietic cell	221	2611	2352	975	1217	2971
Marrow - hematopoietic precursor cell	Marrow	hematopoietic precursor cell	265	5245	4168	612	1848	5562
Marrow - immature B cell	Marrow	immature B cell	344	3055	1651	990	1453	3485
Marrow - immature natural killer cell	Marrow	immature natural killer cell	36	1262	612	315	439	1364
Marrow - immature NK T cell	Marrow	immature NK T cell	37	1562	823	303	474	1693
Marrow - immature T cell	Marrow	immature T cell	60	1601	867	413	806	1773
Marrow - late pro-B cell	Marrow	late pro-B cell	306	4270	3980	904	1676	4774
Marrow - macrophage	Marrow	macrophage	173	2908	1798	660	1292	3143
Marrow - mature natural killer cell	Marrow	mature natural killer cell	49	2120	786	389	483	2213
Marrow - megakaryocyte-erythroid progenitor cell	Marrow	megakaryocyte-erythroid progenitor cell	55	4277	4549	359	1395	5102
Marrow - monocyte	Marrow	monocyte	266	3034	2190	728	1065	3371
Marrow - naive B cell	Marrow	naive B cell	692	1878	816	679	1148	2300
Marrow - pre-natural killer cell	Marrow	pre-natural killer cell	22	2999	2590	276	631	3566
Marrow - precursor B cell	Marrow	precursor B cell	517	2407	1064	1117	1634	2897
Marrow - regulatory T cell	Marrow	regulatory T cell	27	1170	634	304	635	1348
Marrow - Slamf1-negative multipotent progenitor cell	Marrow	Slamf1-negative multipotent progenitor cell	713	5434	5444	948	2344	6056
Marrow - Slamf1-positive multipotent progenitor cell	Marrow	Slamf1-positive multipotent progenitor cell	134	4851	5017	542	1698	5600
Pancreas - endothelial cell	Pancreas	endothelial cell	66	1948	1449	443	984	2197
Pancreas - leukocyte	Pancreas	leukocyte	54	1240	1148	341	875	1596
Pancreas - pancreatic A cell	Pancreas	pancreatic A cell	390	3992	4724	1315	2624	5032
Pancreas - pancreatic acinar cell	Pancreas	pancreatic acinar cell	182	867	806	1288	2704	3005
Pancreas - pancreatic D cell	Pancreas	pancreatic D cell	140	4291	4589	1146	2672	5092
Pancreas - pancreatic ductal cell	Pancreas	pancreatic ductal cell	161	4233	3416	968	1859	4635
Pancreas - pancreatic PP cell	Pancreas	pancreatic PP cell	73	3259	3569	619	1650	4042
Pancreas - pancreatic stellate cell	Pancreas	pancreatic stellate cell	49	2296	1818	526	1376	2612
Pancreas - type B pancreatic cell	Pancreas	type B pancreatic cell	449	4237	5210	1483	2977	5545
Skin - basal cell of epidermis	Skin	basal cell of epidermis	562	3727	3056	1221	1678	4233
Skin - epidermal cell	Skin	epidermal cell	276	4184	4151	1064	1660	4816
Skin - keratinocyte stem cell	Skin	keratinocyte stem cell	1404	4157	2868	1373	2119	4720
Skin - leukocyte	Skin	leukocyte	15	1350	1310	137	630	1859
Skin - stem cell of epidermis	Skin	stem cell of epidermis	53	3449	3331	474	1075	4192
Spleen - B cell	Spleen	B cell	1297	1915	901	861	1546	2520
Spleen - macrophage	Spleen	macrophage	48	1218	665	404	843	1400
Spleen - T cell	Spleen	T cell	352	1823	831	808	1262	2224
Thymus - DN1 thymic pro-T cell	Thymus	DN1 thymic pro-T cell	32	1309	591	484	731	1454
Thymus - immature T cell	Thymus	immature T cell	1277	3030	1329	845	1957	3480
Thymus - leukocyte	Thymus	leukocyte	40	1137	611	323	716	1409
Tongue - basal cell of epidermis	Tongue	basal cell of epidermis	1086	6031	6685	1524	2594	7151
Tongue - keratinocyte	Tongue	keratinocyte	330	4312	4707	1123	1664	5250
Trachea - blood cell	Trachea	blood cell	206	2536	1983	733	1168	2988
Trachea - endothelial cell	Trachea	endothelial cell	113	2437	1652	815	1497	2752
Trachea - epithelial cell	Trachea	epithelial cell	201	1827	1718	934	2486	2855
Trachea - mesenchymal cell	Trachea	mesenchymal cell	830	4067	3907	1594	2320	4819
