# Supplementary material for: Genetic mapping of etiologic brain cell types for obesity
Source: eLife. 2020 Sep 21;9:e55851. doi: 10.7554/eLife.55851 (PMC7505664; doi:10.7554/eLife.55851)
Supplement: Figure 2—source data 3. [file elife-55851-fig2-data3.xlsx]

## Sheet: 4 - S-LDSC TM
Annotation	P-value	Estimate	Std.error	FWER < 0.05	AD (Jansen, 2019)	ADHD (Demontis, 2017)	AN (Duncan, 2017)	ASD (Grove, 2018)	BIP (PGC, 2018)	CAD (Schunkert, 2011)	CVD (Loh, 2018)	CELIAC (Dubois, 2010)	CROHNS (Jostins, 2012)	DEP (Nagel, 2018)	BP_DIA (Loh, 2018)	EA3 (Lee, 2018)	FG_F (Lagou, 2018)	FI_F (Lagou, 2018)	HBA1C (Wheeler, 2017)	HEIGHT (Loh, 2018)	IBD (Jostins, 2012)	INS (Jansen, 2018)	INT (Savage, 2018)	HDL (Teslovich, 2010)	LDL (Teslovich, 2010)	TG (Teslovich, 2010)	SLE (Bentham, 2015)	MDD (Howard, 2019)	MS (Patsopoulos, 2011)	NEU (Nagel, 2018)	PBC (Cordell, 2015)	RA (Okada, 2014)	RT (Linner, 2019)	SCZ (Pardinas, 2018)	SWB (Okbay, 2016)	BP_SYS (Loh, 2018)	T1D (Bradfield, 2011)	T2D (Loh, 2018)	UC (Jostins, 2012)	WHR (Pulit, 2019)	WHRadjBMI (Loh, 2018)	WORRY (Nagel, 2018)
Brain - neuron	2.42066e-10	2.2489e-08	3.61318e-09	TRUE	0.19875	0.00101962	0.0874491	0.000424796	1.16891e-16	0.0970208	0.446368	0.602625	0.877239	8.20343e-09	0.914688	6.01047e-24	0.0448161	0.53797	0.78397	0.999994	0.858876	3.12874e-07	4.57101e-20	0.744818	0.31497	0.41728	0.735948	1.78934e-09	0.119285	1.33972e-11	0.457529	0.826323	6.61146e-08	4.62413e-16	0.00997921	0.849266	0.0933341	0.77975	0.759256	0.059399	0.997067	3.06264e-14
Brain - oligodendrocyte precursor cell	2.30158e-05	1.63211e-08	4.00526e-09	TRUE	0.431288	0.113669	0.490643	0.105134	9.41704e-07	0.260198	0.80837	0.457799	0.865535	0.083242	0.988839	2.38822e-07	0.141322	0.512095	0.755792	0.994	0.797414	0.0115695	5.08544e-07	0.649703	0.402899	0.1153	0.994135	7.41771e-06	0.153682	0.000138244	0.752089	0.916421	0.0534914	1.21927e-07	0.648759	0.987681	0.346598	0.35808	0.973418	0.0119501	0.835793	3.03705e-07
Pancreas - pancreatic D cell	0.00258388	1.12992e-08	4.04066e-09	FALSE	0.659738	0.124989	0.927043	0.472404	0.000199689	0.230781	0.0976292	0.867633	0.554836	0.133487	0.736151	0.00756493	0.00802543	0.225587	0.103187	0.962256	0.499819	0.329259	4.4251e-05	0.902096	0.0479799	0.449103	0.552307	0.190771	0.60344	0.0253691	0.278153	0.230298	0.125901	0.00165824	0.461384	0.458661	0.017683	0.0175227	0.423975	0.338688	0.966865	0.00160657
Pancreas - pancreatic A cell	0.00365132	1.36318e-08	5.08134e-09	FALSE	0.135513	0.0029299	0.187019	0.0531314	0.000263547	0.388688	0.242348	0.778207	0.918597	0.124167	0.596937	0.00239752	0.0160922	0.0954484	0.108527	0.995253	0.78704	0.0402873	5.52783e-06	0.711259	0.0472892	0.252049	0.706124	0.331816	0.707042	0.0583604	0.774947	0.444023	0.115506	0.000106584	0.0281554	0.451665	0.421172	0.043767	0.698984	0.288126	0.939153	0.00236535
Brain - oligodendrocyte	0.00542233	1.11097e-08	4.36075e-09	FALSE	0.298544	0.773254	0.27155	0.113912	0.199423	0.551188	0.778392	0.700971	0.501118	0.363646	0.990954	6.95063e-05	0.135336	0.881297	0.332468	0.999483	0.50365	0.000810672	0.000235376	0.904505	0.446771	0.565242	0.721457	0.00431638	0.838568	0.0317348	0.302984	0.957598	0.163798	0.000410761	0.361257	0.968063	0.853759	0.151316	0.810124	0.128898	0.840635	0.000790589
Pancreas - type B pancreatic cell	0.00635631	9.95303e-09	3.99444e-09	FALSE	0.851489	0.0455807	0.688154	0.0196226	0.000609894	0.170019	0.121703	0.930126	0.811998	0.0292651	0.643738	0.0396298	0.00787737	0.274499	0.0525606	0.990348	0.851569	0.562239	0.000196293	0.245003	0.00886376	0.0517395	0.387182	0.382278	0.166362	0.128637	0.630441	0.70537	0.25015	0.00673858	0.338503	0.573577	0.17931	0.0805435	0.524586	0.345196	0.870528	0.00189456
Brain - brain pericyte	0.0124499	1.05319e-08	4.69556e-09	FALSE	0.36768	0.734557	0.298534	0.480706	0.286945	0.220512	0.0214203	0.37497	0.830688	0.908591	0.00013972	0.0276262	0.106857	0.362468	0.939354	0.0562156	0.251104	0.0365394	0.253724	0.365125	0.44859	0.229125	0.926322	0.405226	0.868268	0.389661	0.813191	0.95292	0.265552	0.113185	0.437915	0.000688426	0.993369	0.489854	0.0760674	0.26697	0.186603	0.352717
Brain - Bergmann glial cell	0.0140743	1.00603e-08	4.58285e-09	FALSE	0.447192	0.0997746	0.546289	0.0886978	0.01621	0.543805	0.899502	0.969716	0.547177	0.188649	0.859098	4.41771e-06	0.302481	0.977018	0.494504	0.929554	0.835138	0.0690093	0.000160626	0.849698	0.841658	0.860217	0.972784	4.73633e-05	0.800666	0.0569323	0.589621	0.998698	0.0981119	0.000950633	0.559511	0.730271	0.619738	0.587705	0.885582	0.295055	0.955377	0.00185378
Brain - astrocyte	0.0167881	8.23813e-09	3.87654e-09	FALSE	0.730683	0.305131	0.458003	0.117845	0.0185839	0.804918	0.956362	0.722404	0.679963	0.0853118	0.983531	1.55572e-06	0.150255	0.621663	0.495078	0.980047	0.900531	0.0106397	2.68893e-07	0.381499	0.541702	0.446501	0.967316	0.000180904	0.683768	0.00447861	0.81542	0.99907	0.0706984	0.000236364	0.458453	0.965769	0.688643	0.562887	0.864347	0.134313	0.832422	0.00010967
Pancreas - pancreatic PP cell	0.0284859	1.26088e-08	6.6239e-09	FALSE	0.771023	0.00181853	0.317651	0.0596564	0.00121108	0.828982	0.115742	0.727528	0.796083	0.473906	0.363492	0.0679597	0.00605862	0.368436	0.189258	0.998495	0.676061	0.048651	0.00126727	0.758912	0.14488	0.115005	0.67286	0.354556	0.74602	0.167325	0.475749	0.308728	0.095278	0.00181639	0.0451292	0.307595	0.232494	0.00403429	0.7987	0.487874	0.978502	0.00575283
Heart - smooth muscle cell	0.0306916	1.07629e-08	5.75332e-09	FALSE	0.265742	0.248801	0.167252	0.232712	0.307664	0.206592	0.00376871	0.455015	0.817598	0.895961	5.37531e-05	0.290283	0.119616	0.384393	0.775759	0.0399457	0.315828	0.278246	0.423824	0.703334	0.638196	0.113623	0.836148	0.654188	0.810517	0.654943	0.711456	0.966799	0.121749	0.399809	0.749747	0.000327468	0.843154	0.438263	0.17347	0.508826	0.382178	0.751528
Pancreas - pancreatic acinar cell	0.0346406	1.1541e-08	6.35314e-09	FALSE	0.829446	0.00336144	0.104553	0.296057	0.0541732	0.00658568	0.00387008	0.434154	0.733884	0.845109	0.00301729	0.283232	0.061889	0.781195	0.581896	0.46557	0.777199	0.0250322	0.0217406	0.380222	0.0152416	0.137626	0.458018	0.511767	0.816616	0.570438	0.800705	0.379361	0.158206	0.448703	0.938751	0.0407844	0.0985367	0.0044512	0.70488	0.186368	0.178588	0.449058
Marrow - B cell	0.102258	1.00402e-08	7.91323e-09	FALSE	0.635925	0.70182	0.752556	0.926005	0.022097	0.797659	0.586995	6.60512e-05	0.000517839	0.439948	0.6267	0.0086169	0.96414	0.896256	0.460994	0.856583	5.88056e-05	0.747941	0.0490739	0.478593	0.761283	0.954334	0.000209755	0.468413	4.15321e-09	0.268125	0.000181244	1.19378e-07	0.267456	0.200302	0.396654	0.939409	1.41407e-05	0.684676	0.00257185	0.703998	0.655356	0.663634
Large Intestine - enteroendocrine cell	0.110202	6.37406e-09	5.2014e-09	FALSE	0.724026	0.070452	0.504573	0.480303	0.00847706	0.40996	0.0109991	0.953365	0.88848	0.824845	0.303459	0.531281	0.0295515	0.552524	0.494945	0.953359	0.22949	0.610607	0.0471408	0.391145	0.072729	0.366032	0.119036	0.477422	0.756663	0.28451	0.155678	0.782054	0.32754	0.333261	0.550506	0.132308	0.00608678	0.0396234	0.0559465	0.51169	0.766237	0.291477
Spleen - macrophage	0.122473	8.65778e-09	7.44618e-09	FALSE	0.682463	0.639906	0.141529	0.780489	0.0257381	0.919942	0.889766	0.00884203	0.0166305	0.452538	0.862318	0.25156	0.333652	0.993054	0.55891	0.562012	0.00202744	0.446194	0.8163	0.939663	0.63449	0.881682	0.00156061	0.381486	2.86124e-05	0.643286	0.026341	4.06152e-05	0.804692	0.588454	0.427834	0.994326	0.00219993	0.815722	0.0055033	0.931676	0.9745	0.677694
Thymus - immature T cell	0.125484	5.74734e-09	5.00639e-09	FALSE	0.374121	0.793227	0.719585	0.613811	0.00261464	0.974504	0.433169	0.127266	0.0179673	0.920511	0.419679	0.0274701	0.159171	0.440004	0.0298661	0.355105	0.00960469	0.559523	0.445854	0.359853	0.366554	0.675022	0.0427282	0.690364	1.48352e-05	0.64761	0.0158353	2.03469e-06	0.642775	0.426964	0.87682	0.696487	0.0285048	0.100909	0.0547245	0.336261	0.328684	0.942759
Marrow - hematopoietic precursor cell	0.16768	5.51695e-09	5.72669e-09	FALSE	0.0381754	0.23636	0.741652	0.486869	0.00137026	0.0189647	0.0662182	0.158118	0.0592298	0.587123	0.18318	0.0605169	0.93707	0.28851	0.0212614	0.083554	0.138974	0.478874	0.258764	0.213795	0.148866	0.0970302	0.0050737	0.859135	0.0150913	0.828724	0.0608652	0.000620119	0.33369	0.0971697	0.198875	0.154118	0.200309	0.0446849	0.22602	0.00932963	0.0152048	0.965068
Limb Muscle - skeletal muscle satellite cell	0.172547	4.76624e-09	5.04818e-09	FALSE	0.180047	0.756102	0.301632	0.677807	0.415136	0.827284	0.0974749	0.167877	0.015656	0.757832	0.152658	0.178297	0.0273697	0.0223254	0.25471	0.000774325	0.0025358	0.311944	0.368152	0.142628	0.114042	0.0930217	0.511132	0.257434	0.0129531	0.454315	0.342145	0.262878	0.815843	0.503716	0.313375	0.0643113	0.0870843	0.396879	0.0264244	0.170675	0.0314925	0.553642
Kidney - endothelial cell	0.177597	8.59484e-09	9.29611e-09	FALSE	0.158974	0.0639363	0.939618	0.882103	0.857192	0.131805	0.00503154	0.262871	0.875767	0.811185	0.000278598	0.981761	0.991959	0.539918	0.205407	0.229111	0.69329	0.787444	0.753742	0.274314	0.527268	0.566695	0.646772	0.838398	0.952901	0.916476	0.999221	0.836982	0.348685	0.754528	0.731105	0.00620105	0.412642	0.722612	0.385185	0.0816918	0.0880039	0.877547
Limb Muscle - skeletal muscle satellite stem cell	0.186006	5.12542e-09	5.7414e-09	FALSE	0.226103	0.945588	0.304016	0.611666	0.655318	0.276538	0.0374499	0.751254	0.0665895	0.938217	0.0347191	0.258793	0.0245299	0.0169488	0.356044	0.00123676	0.0272295	0.611226	0.332714	0.338504	0.179308	0.0403884	0.389655	0.819323	0.112798	0.91068	0.610703	0.828407	0.911387	0.525368	0.14238	0.0323477	0.658587	0.141277	0.0838509	0.0468384	0.0308988	0.876525
Thymus - leukocyte	0.191608	7.26969e-09	8.33694e-09	FALSE	0.191806	0.563775	0.779814	0.265809	0.36146	0.989154	0.738906	0.211611	0.248089	0.534166	0.866665	0.765346	0.925274	0.67237	0.894925	0.705262	0.297628	0.32016	0.132845	0.445528	0.446355	0.915678	0.00571389	0.792428	0.0322616	0.743826	0.0995295	8.82529e-05	0.0566117	0.729856	0.882928	0.938303	0.00427567	0.0732204	0.514135	0.914611	0.907964	0.284228
Marrow - basophil	0.19978	9.12055e-09	1.08268e-08	FALSE	0.00938749	0.692401	0.420402	0.666303	0.000905209	0.262653	0.478903	0.0435555	0.0730487	0.976837	0.824425	0.206146	0.868312	0.884294	0.1836	0.223472	0.0077939	0.33911	0.131536	0.149999	0.133303	0.656497	0.0257059	0.584677	0.00107349	0.9385	0.169133	0.0126314	0.916955	0.541675	0.650317	0.784767	0.253963	0.0984213	0.0392417	0.252943	0.137552	0.90383
Marrow - immature T cell	0.202501	5.34668e-09	6.42074e-09	FALSE	0.888137	0.776932	0.0674119	0.858055	0.0278827	0.997021	0.7139	0.00245352	0.000684954	0.301161	0.887223	0.68317	0.49636	0.700329	0.0456249	0.988106	0.00374395	0.737418	0.280461	0.862106	0.61166	0.985701	0.00371139	0.567108	3.04166e-08	0.492553	0.00666947	5.37187e-06	0.925211	0.688814	0.617413	0.997563	0.000114905	0.600041	0.011672	0.75662	0.82846	0.875807
Spleen - T cell	0.222365	4.12461e-09	5.39706e-09	FALSE	0.843001	0.557983	0.396345	0.55177	0.0132288	0.997482	0.861311	0.00569995	0.000316662	0.214258	0.895977	0.252482	0.231364	0.190006	0.260489	0.950526	0.000556831	0.764052	0.671651	0.541645	0.953578	0.991187	0.00940484	0.675002	1.85014e-08	0.821761	0.00455938	1.21728e-06	0.86057	0.495204	0.692759	0.995349	0.00199854	0.521089	0.00631241	0.939644	0.780196	0.972373
Marrow - Slamf1-positive multipotent progenitor cell	0.225949	4.0019e-09	5.31988e-09	FALSE	0.0251978	0.430215	0.595762	0.506731	0.000317553	0.0475585	0.352823	0.812347	0.323973	0.868981	0.917524	0.0029297	0.485344	0.530232	0.00856485	0.210838	0.159228	0.210117	0.0596606	0.263697	0.366947	0.166987	0.268335	0.961142	0.0203577	0.934513	0.318747	0.130532	0.583366	0.220564	0.721249	0.907192	0.457011	0.0148896	0.195931	0.179344	0.132039	0.988748
Marrow - granulocytopoietic cell	0.240528	3.65729e-09	5.19055e-09	FALSE	0.677132	0.401196	0.47234	0.661906	0.0125025	0.362281	0.438013	0.550798	0.255645	0.611232	0.625136	0.00338432	0.498867	0.0980391	0.250769	0.0977252	0.154141	0.0876385	0.0172961	0.395662	0.241236	0.060576	0.512796	0.637935	0.146333	0.363972	0.376062	0.0535596	0.915879	0.581892	0.873096	0.739601	0.27067	0.54042	0.11489	0.617493	0.746237	0.720054
Lung - natural killer cell	0.244534	5.23405e-09	7.56594e-09	FALSE	0.686613	0.5791	0.356813	0.790282	0.0681199	0.896999	0.933688	0.000624833	0.0178731	0.156877	0.993469	0.825307	0.941352	0.652672	0.707683	0.976309	0.00342035	0.929326	0.522174	0.881826	0.676532	0.666167	0.00166756	0.440797	6.81791e-05	0.567502	0.011065	0.000152822	0.85065	0.472264	0.533441	0.995409	0.00832943	0.85529	0.0115619	0.462355	0.459171	0.756577
Fat - T cell	0.253956	3.82816e-09	5.78191e-09	FALSE	0.787541	0.738155	0.0682967	0.610655	0.00668395	0.998709	0.933948	0.000338346	4.84324e-05	0.350666	0.999418	0.311714	0.247915	0.339506	0.29618	0.987771	5.7911e-05	0.972572	0.463634	0.888396	0.992168	0.66346	0.0173484	0.65315	1.3012e-09	0.829027	1.45702e-05	1.5044e-06	0.973425	0.386498	0.891212	0.999999	9.40783e-05	0.796741	0.0011228	0.970376	0.865451	0.797025
Heart - unknown cell type	0.266927	3.31899e-09	5.33485e-09	FALSE	0.134739	0.64043	0.406012	0.468622	0.549143	0.697803	0.671784	0.64721	0.683961	0.945168	0.419771	0.527932	0.693748	0.315111	0.714426	0.249158	0.353505	0.516815	0.855547	0.898022	0.0680231	0.459147	0.707594	0.644405	0.32984	0.422502	0.305824	0.941882	0.210105	0.456546	0.34362	0.394808	0.80739	0.993509	0.211192	0.633747	0.750328	0.114898
Lung - monocyte	0.268198	4.21962e-09	6.82486e-09	FALSE	0.0347925	0.57999	0.54857	0.477547	0.0477312	0.101502	0.301421	0.195084	0.0229628	0.610471	0.693271	0.531549	0.839466	0.460348	0.68764	0.728709	0.000109527	0.499123	0.517684	0.478641	0.101342	0.352431	0.0977168	0.907731	0.0328886	0.749389	0.0491009	0.267035	0.995091	0.799109	0.229347	0.643382	0.267712	0.385325	0.000417341	0.621849	0.771629	0.880075
Lung - T cell	0.271822	4.18485e-09	6.89077e-09	FALSE	0.988569	0.523834	0.11551	0.564628	0.00112773	0.993704	0.62643	0.00091317	0.00197183	0.242615	0.874998	0.0372203	0.295867	0.20383	0.466766	0.843705	0.000871362	0.787378	0.682036	0.866587	0.958405	0.986907	0.00130015	0.500337	4.719e-08	0.731473	0.00373732	0.000292539	0.752365	0.340011	0.604543	0.977671	0.00192905	0.368404	0.0477344	0.918286	0.802779	0.779493
Marrow - Slamf1-negative multipotent progenitor cell	0.290394	2.81723e-09	5.10151e-09	FALSE	0.0584083	0.479139	0.592753	0.512467	0.000157898	0.00404137	0.106031	0.281387	0.26874	0.766028	0.562465	0.011196	0.809344	0.527019	0.0291252	0.152043	0.0883522	0.21775	0.0675091	0.186894	0.162804	0.106087	0.0212474	0.913512	0.0102851	0.787846	0.219254	0.0748322	0.757283	0.468222	0.51474	0.33138	0.321026	0.0189993	0.0952652	0.130768	0.0512099	0.968983
Liver - B cell	0.308749	4.06077e-09	8.1313e-09	FALSE	0.0801482	0.892558	0.969082	0.498481	0.00535227	0.762426	0.69132	0.0736727	0.347243	0.894523	0.850664	0.110176	0.194237	0.711898	0.398165	0.95518	0.246553	0.88519	0.0658146	0.228829	0.237172	0.0479245	0.00451825	0.329872	0.00027939	0.830706	0.00296493	0.0041851	0.297849	0.852324	0.86305	0.92262	0.0284183	0.356219	0.180457	0.875718	0.82156	0.83778
Marrow - common lymphoid progenitor	0.309602	2.6595e-09	5.35135e-09	FALSE	0.155269	0.302445	0.855685	0.685634	0.0014648	0.234666	0.0503712	0.322351	0.276676	0.895468	0.271454	0.0354823	0.743349	0.499918	0.0566368	0.0651528	0.185194	0.279756	0.111368	0.276923	0.138821	0.148576	0.0841519	0.977675	0.00569177	0.960945	0.0840297	0.00227918	0.570849	0.0510103	0.747845	0.154239	0.623616	0.0669378	0.195971	0.179484	0.0624186	0.993043
Spleen - B cell	0.360632	2.43511e-09	6.82541e-09	FALSE	0.0363016	0.590885	0.655157	0.52809	0.0175031	0.633459	0.0907312	0.0081313	0.00211976	0.894467	0.119815	0.00892452	0.978661	0.594586	0.879594	0.898978	0.000298243	0.912471	0.00631899	0.210695	0.541628	0.264604	1.43943e-05	0.128628	1.04734e-07	0.574987	3.33048e-05	2.25578e-05	0.319841	0.221419	0.368158	0.228224	0.0124804	0.411341	0.00791366	0.701315	0.486715	0.765551
Fat - unknown cell type	0.408577	1.25313e-09	5.41993e-09	FALSE	0.15965	0.44401	0.865792	0.815775	0.163877	0.38075	0.0335635	0.0256161	0.706403	0.954426	0.285562	0.639879	0.490811	0.685773	0.633523	0.90468	0.174393	0.266422	0.790659	0.476008	0.876976	0.216243	0.0025131	0.489629	0.183881	0.966741	0.043042	0.0107957	0.782221	0.643514	0.305574	0.195942	0.0227031	0.947629	0.149526	0.864545	0.837141	0.996182
Bladder - bladder cell	0.42155	8.21235e-10	4.14911e-09	FALSE	0.990652	0.864822	0.269289	0.645804	0.924925	0.663724	0.879132	0.276569	0.0665036	0.698864	0.407574	0.999468	0.636247	0.655616	0.981695	0.000765613	0.0277114	0.616419	0.946322	0.314651	0.132973	0.373455	0.465054	0.638508	0.125023	0.947763	0.616764	0.145224	0.989917	0.625674	0.937917	0.320359	0.0808398	0.990838	0.0319	0.134744	0.0318286	0.96466
Fat - natural killer cell	0.427656	1.33446e-09	7.31831e-09	FALSE	0.366735	0.960134	0.302962	0.986997	0.0923279	0.895619	0.989282	0.00215296	0.00678216	0.602617	0.984405	0.338222	0.464218	0.832843	0.284283	0.925027	0.000363116	0.836602	0.0982875	0.667299	0.476291	0.284082	0.00213333	0.590963	2.93439e-05	0.687878	0.00226076	0.000587377	0.95737	0.945749	0.255565	0.999935	0.000657926	0.869925	0.00195933	0.747633	0.88805	0.859178
Marrow - megakaryocyte-erythroid progenitor cell	0.446554	7.52084e-10	5.597e-09	FALSE	0.025275	0.406071	0.382969	0.524167	0.000705642	0.00475747	0.0375031	0.75638	0.527881	0.830019	0.730727	0.0364098	0.249182	0.275018	0.00365661	0.257121	0.0600231	0.203137	0.104052	0.0816214	0.0604979	0.0401157	0.325342	0.591433	0.0454461	0.718251	0.210054	0.183501	0.526794	0.418716	0.938408	0.453563	0.334987	0.021813	0.0683211	0.311968	0.113177	0.834356
Marrow - naive B cell	0.457959	6.26561e-10	5.93467e-09	FALSE	0.0430727	0.523535	0.420941	0.664718	0.0468171	0.269792	0.215593	0.0402836	0.00390023	0.956881	0.0743229	0.000219311	0.925801	0.612788	0.910044	0.819232	0.0041164	0.956665	0.0038605	0.408348	0.78514	0.730899	0.000266116	0.240499	1.28024e-05	0.433463	0.00055687	0.000223668	0.228518	0.0581031	0.47303	0.214208	0.0316085	0.234627	0.0287164	0.902488	0.431305	0.711878
Marrow - mature natural killer cell	0.460649	6.43289e-10	6.51117e-09	FALSE	0.769123	0.654324	0.516887	0.81103	0.0106809	0.985962	0.937132	0.0105147	0.00375854	0.404765	0.895635	0.110394	0.201424	0.375253	0.451714	0.946685	0.000243763	0.723166	0.152174	0.37226	0.612629	0.277854	0.00492069	0.449496	3.02473e-06	0.653057	0.0103728	0.000256553	0.603105	0.46123	0.118075	0.976085	0.0035506	0.709224	0.000640861	0.164547	0.311834	0.719294
Marrow - macrophage	0.472901	3.57834e-10	5.26376e-09	FALSE	0.576552	0.230956	0.449655	0.612172	0.012383	0.38144	0.428954	0.0356579	0.130277	0.0736288	0.44785	0.00222064	0.728773	0.584134	0.499086	0.83353	0.0398268	0.156976	0.00117031	0.511531	0.142875	0.405074	0.00267121	0.0462976	0.000956363	0.000263824	0.00724435	0.000716879	0.273953	0.0696243	0.0542642	0.173056	0.180535	0.141436	0.0238658	0.322515	0.259362	0.0582684
Pancreas - pancreatic ductal cell	0.477325	2.61081e-10	4.59103e-09	FALSE	0.156789	0.0442227	0.753807	0.760988	0.339704	0.0210466	0.0266377	0.814855	0.939704	0.378929	0.398059	0.796286	0.0919785	0.137673	0.00748134	0.581468	0.870024	0.928241	0.98271	0.394188	0.242354	0.246592	0.221552	0.056522	0.911942	0.553888	0.179305	0.921002	0.935996	0.357647	0.720062	0.232911	0.555623	0.019554	0.673447	0.554455	0.336674	0.564736
Kidney - leukocyte	0.483061	3.45275e-10	8.1293e-09	FALSE	0.0799698	0.836089	0.667779	0.110456	0.00636795	0.914239	0.759824	0.000645788	0.0107173	0.389423	0.990425	0.674565	0.915918	0.825726	0.581396	0.447704	0.000946579	0.532813	0.317398	0.252689	0.157788	0.529444	0.000100469	0.935319	0.000169	0.670021	0.00200454	0.000397309	0.835128	0.202982	0.867511	0.971076	0.0133639	0.93933	0.00161776	0.282566	0.153342	0.94618
Pancreas - pancreatic stellate cell	0.495525	5.756e-11	5.13098e-09	FALSE	0.926505	0.809133	0.248489	0.87219	0.993126	0.133471	0.00580856	0.138982	0.618861	0.913015	8.19984e-05	0.910387	0.060244	0.035976	0.888543	5.63176e-05	0.235739	0.474983	0.995784	0.309463	0.0282065	0.0959599	0.983849	0.902296	0.963513	0.985668	0.738458	0.823592	0.74069	0.771028	0.813357	0.000139919	0.204915	0.749283	0.215646	0.026255	0.00358241	0.986519
Marrow - immature NK T cell	0.538648	-5.71463e-10	5.88969e-09	FALSE	0.169283	0.824895	0.0301197	0.765613	0.0120887	0.998308	0.998642	0.012968	0.0174126	0.302242	0.993402	0.818714	0.839195	0.681018	0.513715	0.931889	0.00363627	0.933722	0.232719	0.340507	0.185958	0.763427	0.00353832	0.985672	2.04546e-09	0.832206	0.00608892	3.76181e-05	0.795296	0.954168	0.506514	0.999978	0.00165065	0.993076	0.0220798	0.834727	0.816299	0.992873
Marrow - granulocyte	0.545616	-5.49985e-10	4.79952e-09	FALSE	0.0136029	0.163982	0.202342	0.0224887	0.0824064	0.480468	0.541415	0.344001	0.0903961	0.502422	0.859217	0.24501	0.877951	0.854295	0.440889	0.915925	0.0382317	0.262551	0.101243	0.3885	0.157945	0.182186	0.497417	0.425411	0.145239	0.107508	0.663808	0.0651066	0.963585	0.725662	0.316127	0.985501	0.423232	0.952389	0.0836676	0.856157	0.977622	0.572138
Lung - leukocyte	0.554128	-8.98126e-10	6.59908e-09	FALSE	0.0536984	0.497697	0.323137	0.331007	0.0929632	0.739946	0.126513	0.256784	0.0657638	0.821109	0.505583	0.638921	0.975257	0.810544	0.709752	0.648984	0.00102677	0.318249	0.36492	0.479734	0.0120946	0.63669	0.55999	0.553809	0.00547362	0.599416	0.343391	0.0940459	0.986206	0.597485	0.968983	0.669592	0.658418	0.371328	0.00659122	0.815332	0.93804	0.765012
Marrow - immature B cell	0.558872	-7.29344e-10	4.92436e-09	FALSE	0.0312569	0.774257	0.585693	0.525798	0.00210988	0.470729	0.0590087	0.100645	0.00299802	0.925682	0.0648903	0.0152296	0.632907	0.786328	0.688862	0.824321	0.00158738	0.886957	0.0410314	0.153572	0.54338	0.153328	0.000120102	0.529694	3.27559e-08	0.336217	0.000142806	4.14132e-07	0.353231	0.0201032	0.225482	0.096599	0.00844722	0.347613	0.0100631	0.683389	0.316483	0.771193
Marrow - pre-natural killer cell	0.580611	-1.30962e-09	6.43687e-09	FALSE	0.568482	0.566718	0.277052	0.706726	8.38541e-05	0.949126	0.469661	0.0388689	0.0421087	0.861061	0.609692	0.0117202	0.127377	0.448146	0.0523205	0.465943	0.0105976	0.602039	0.111168	0.462841	0.142555	0.138758	0.140234	0.574756	3.75229e-05	0.89978	0.0560865	0.0120788	0.802535	0.077315	0.771446	0.578358	0.085477	0.292653	0.0189125	0.662746	0.548784	0.975721
Lung - unknown cell type	0.586356	-1.56618e-09	7.17838e-09	FALSE	0.924795	0.503563	0.734702	0.737153	0.425225	0.518612	0.526303	0.626431	0.506708	0.588519	0.0518796	0.239164	0.0613905	0.333528	0.129266	0.977495	0.270489	0.4171	0.418902	0.547168	0.354795	0.637068	0.728509	0.12306	0.89411	0.0579273	0.998358	0.554942	0.0905312	0.498348	0.892882	0.362943	0.0256015	0.541659	0.440163	0.287055	0.239952	0.0734614
Pancreas - leukocyte	0.588673	-1.71778e-09	7.66414e-09	FALSE	0.0395563	0.926308	0.228426	0.0441935	0.347609	0.94076	0.0188533	0.0212603	0.00132033	0.984008	0.29295	0.540888	0.518794	0.956736	0.725998	0.992393	0.00035469	0.587151	0.250618	0.261106	0.446774	0.277204	0.0238808	0.761835	0.00071088	0.982843	0.00371773	0.00983824	0.99956	0.670188	0.191895	0.467294	0.00247369	0.942119	0.00711314	0.567695	0.499485	0.986799
Liver - natural killer cell	0.6273	-2.25146e-09	6.93376e-09	FALSE	0.238503	0.664361	0.609852	0.379394	0.139468	0.99248	0.768514	0.0187212	0.00401958	0.650558	0.82766	0.67578	0.981618	0.556971	0.0753908	0.977901	0.000889169	0.935524	0.598855	0.358643	0.144126	0.050207	0.00454112	0.751348	2.23883e-05	0.665763	0.00065204	1.52225e-05	0.978578	0.96653	0.833945	0.991798	0.00275205	0.907911	0.00537686	0.623438	0.420116	0.853548
Mammary Gland - luminal epithelial cell of mammary gland	0.647774	-1.73302e-09	4.5688e-09	FALSE	0.145677	0.712261	0.954669	0.435799	0.319743	0.123412	0.602749	0.877691	0.74427	0.998594	0.888615	0.798224	0.363905	0.742219	0.349605	0.511484	0.215804	0.795091	0.967318	0.261605	0.288523	0.630982	0.322289	0.777714	0.757052	0.998652	0.373969	0.117841	0.807351	0.535721	0.793587	0.880195	0.119461	0.230082	0.231444	0.952656	0.777783	0.999508
Kidney - macrophage	0.648191	-2.85235e-09	7.49747e-09	FALSE	0.000936562	0.302446	0.780897	0.510381	0.657967	0.31518	0.368628	0.0174799	0.00213104	0.860612	0.680049	0.877497	0.926829	0.968176	0.201235	0.909898	0.00507902	0.749323	0.536823	0.26728	0.178917	0.225586	0.000482346	0.626864	0.00332571	0.677682	0.00313509	0.00939051	0.998482	0.36332	0.120467	0.545107	0.00586199	0.877863	0.0213034	0.317325	0.145417	0.737863
Skin - keratinocyte stem cell	0.650224	-2.00445e-09	5.1939e-09	FALSE	0.28061	0.755169	0.00508365	0.0953683	0.366449	0.0383053	0.683372	0.694043	0.856145	0.538136	0.90623	0.962077	0.465127	0.852066	0.240566	0.226014	0.888843	0.913443	0.917736	0.495131	0.399588	0.0156088	0.27591	0.848475	0.984058	0.979051	0.916619	0.464518	0.701741	0.419972	0.936628	0.858993	0.251318	0.219251	0.621837	0.412952	0.220935	0.908996
Fat - mesenchymal stem cell of adipose	0.666412	-1.84723e-09	4.29562e-09	FALSE	0.930877	0.963779	0.702528	0.53349	0.992744	0.365691	0.538641	0.466381	0.222815	0.924384	0.116922	0.792443	0.514685	0.410298	0.889155	0.000223404	0.0594911	0.427584	0.966559	0.205633	0.324748	0.0973947	0.857326	0.978527	0.220608	0.959982	0.646334	0.615999	0.970119	0.848675	0.110399	0.0260811	0.223424	0.872112	0.0264071	0.00394222	0.000202953	0.974087
Lung - classical monocyte	0.669412	-3.11699e-09	7.11168e-09	FALSE	0.0818522	0.828537	0.608559	0.21418	0.236164	0.24768	0.266144	0.798929	0.558395	0.934551	0.950203	0.352013	0.886775	0.678736	0.247285	0.873711	0.0313174	0.498709	0.272282	0.440072	0.181587	0.622824	0.0547862	0.957191	0.094515	0.908557	0.0201532	0.411471	0.984633	0.900558	0.699567	0.902661	0.209496	0.998195	0.0173788	0.29009	0.307602	0.986847
Trachea - epithelial cell	0.674566	-1.93284e-09	4.27095e-09	FALSE	0.189108	0.136138	0.798489	0.843334	0.86097	0.26572	0.322577	0.455357	0.608538	0.958036	0.0787001	0.836994	0.391239	0.0926879	0.469661	0.911846	0.51683	0.561061	0.748735	0.948225	0.553614	0.703799	0.298123	0.997648	0.487519	0.976649	0.788245	0.945821	0.269294	0.910284	0.649462	0.331309	0.155265	0.858083	0.227933	0.603753	0.647115	0.688739
Marrow - immature natural killer cell	0.679534	-3.08128e-09	6.60656e-09	FALSE	0.260631	0.981335	0.335145	0.96549	0.00176199	0.920683	0.688061	0.00319042	0.0268831	0.402139	0.924504	0.066845	0.97284	0.889407	0.494141	0.72606	0.00169547	0.942859	0.595904	0.657606	0.363516	0.766194	0.00302061	0.725025	1.41853e-05	0.670294	0.0137435	0.00014715	0.897591	0.978501	0.564429	0.889339	0.000326722	0.550739	0.00582463	0.882483	0.868115	0.844341
Marrow - granulocyte monocyte progenitor cell	0.68102	-2.51246e-09	5.33938e-09	FALSE	0.0547974	0.489013	0.264338	0.208019	0.00215607	0.224039	0.598133	0.386964	0.168338	0.873871	0.855444	0.00979115	0.277825	0.67326	0.0499395	0.634979	0.0100683	0.154328	0.408802	0.387009	0.181971	0.241227	0.0166929	0.755944	0.000262306	0.826241	0.0125396	0.0150934	0.472324	0.359023	0.35865	0.707164	0.0737592	0.0626851	0.0114561	0.563685	0.240927	0.963239
Heart - myofibroblast cell	0.681189	-2.28857e-09	4.8587e-09	FALSE	0.653903	0.37419	0.729553	0.307608	0.576349	0.271674	0.00100614	0.126165	0.848071	0.584532	1.42731e-05	0.140913	0.137628	0.883119	0.4341	0.0246983	0.0953264	0.281139	0.91644	0.301698	0.410291	0.516117	0.344083	0.528697	0.746376	0.712286	0.2849	0.656445	0.791342	0.42002	0.303332	2.94607e-05	0.38254	0.95641	0.0340072	0.503558	0.252451	0.660427
Brain - macrophage	0.700026	-3.43038e-09	6.54057e-09	FALSE	0.0063124	0.564448	0.421476	0.340145	0.0735158	0.907074	0.0936741	0.247246	0.0506341	0.893409	0.566912	0.207379	0.57283	0.950629	0.778214	0.866858	0.00921047	0.109371	0.296119	0.0900831	0.0399043	0.456022	0.0114229	0.811342	0.0585466	0.835752	0.0148074	0.726085	0.995608	0.475452	0.873305	0.397885	0.0561451	0.849202	0.0075299	0.839814	0.67356	0.676889
Brain - microglial cell	0.711883	-2.63478e-09	4.71427e-09	FALSE	0.0552502	0.554117	0.0938218	0.114506	0.34503	0.967453	0.066384	0.397591	0.0446845	0.834767	0.162505	0.642229	0.730542	0.991415	0.61017	0.98403	0.0864407	0.396336	0.249015	0.394946	0.108399	0.799758	0.0211318	0.475534	0.337866	0.909222	0.0547308	0.346615	0.981696	0.438919	0.970238	0.102032	0.107591	0.756979	0.100705	0.634407	0.362931	0.555951
Fat - B cell	0.714619	-3.58156e-09	6.31747e-09	FALSE	0.0336645	0.616996	0.191908	0.264142	0.106858	0.83892	0.158565	0.0574591	0.00359386	0.875465	0.221118	0.0268561	0.972208	0.521622	0.903139	0.877339	0.0048229	0.722294	0.00828746	0.475094	0.910473	0.673665	0.000921465	0.181513	3.26086e-06	0.701421	0.000105132	2.97701e-05	0.347702	0.256704	0.843936	0.493053	0.0354796	0.449394	0.0283161	0.974518	0.769352	0.929184
Marrow - late pro-B cell	0.739039	-2.77543e-09	4.33401e-09	FALSE	0.370735	0.625162	0.680404	0.430449	0.000804498	0.317097	0.155179	0.477153	0.479333	0.926798	0.539784	0.00187509	0.374486	0.337723	0.199056	0.615998	0.165822	0.0417433	0.0845068	0.318008	0.345396	0.0967449	0.0196815	0.492508	0.00318402	0.439809	0.0535085	0.00123627	0.338081	0.072791	0.394401	0.479942	0.213489	0.0372937	0.215846	0.780109	0.693179	0.895058
Trachea - mesenchymal cell	0.74004	-2.68581e-09	4.17395e-09	FALSE	0.15291	0.98245	0.0618087	0.591635	0.99648	0.848988	0.752337	0.310549	0.0552492	0.978338	0.336888	0.868511	0.316414	0.721353	0.917862	9.54337e-09	0.0249909	0.808179	0.665824	0.662332	0.350194	0.296659	0.770818	0.983836	0.0583028	0.999457	0.331264	0.352602	0.999213	0.955465	0.347088	0.254474	0.139244	0.885808	0.0168928	0.00501008	0.000129261	0.944565
Lung - epithelial cell of lung	0.759026	-3.63117e-09	5.16397e-09	FALSE	0.140697	0.0824007	0.705913	0.739322	0.165175	0.583829	0.568426	0.534512	0.309546	0.990029	0.241316	0.912921	0.430586	0.255892	0.587237	0.997849	0.535921	0.913154	0.623587	0.129738	0.467529	0.537614	0.573671	0.997685	0.651296	0.999117	0.960476	0.962946	0.460398	0.843313	0.691979	0.628293	0.0138742	0.571631	0.842077	0.494009	0.109638	0.992605
Lung - B cell	0.761106	-5.59151e-09	7.87686e-09	FALSE	0.249368	0.763013	0.729803	0.558764	0.13079	0.838743	0.788596	0.0641626	0.00960931	0.831024	0.274251	0.0350012	0.799675	0.793378	0.640759	0.836844	0.00140132	0.961776	0.0113447	0.34495	0.99385	0.712184	0.000234463	0.331509	3.69717e-05	0.653007	0.000825284	9.06758e-05	0.535741	0.243606	0.73203	0.785286	0.00677084	0.266648	0.015403	0.732531	0.339878	0.81329
Trachea - blood cell	0.762749	-3.70755e-09	5.18413e-09	FALSE	0.0032043	0.864372	0.118117	0.79906	0.0980539	0.989338	0.392862	0.000105916	1.87172e-06	0.745604	0.949621	0.341573	0.845673	0.86176	0.931068	0.974431	6.18304e-07	0.44453	0.404779	0.192788	0.515161	0.50319	0.000503487	0.101176	3.59133e-08	0.592731	0.000153043	6.63674e-07	0.768431	0.31268	0.273453	0.940598	0.00314414	0.840618	0.000112781	0.936613	0.715279	0.871913
Kidney - kidney collecting duct epithelial cell	0.765641	-5.15292e-09	7.11174e-09	FALSE	0.743596	0.526239	0.555929	0.345001	0.93455	0.0784181	0.0102503	0.48773	0.930013	0.98373	0.0120882	0.67431	0.760643	0.25778	0.155635	0.985216	0.740617	0.983889	0.96079	0.143574	0.332483	0.6954	0.330454	0.686818	0.204387	0.981219	0.616037	0.626716	0.974822	0.801656	0.788377	0.0323429	0.769887	0.312946	0.273322	0.549616	0.456808	0.995334
Tongue - keratinocyte	0.767154	-3.24569e-09	4.44916e-09	FALSE	0.212742	0.766942	0.234535	0.626694	0.267259	0.173443	0.77721	0.44582	0.374685	0.721388	0.998651	0.815582	0.902613	0.915267	0.140371	0.964105	0.0836225	0.240688	0.8919	0.14338	0.300722	0.679236	0.0725824	0.653652	0.78109	0.940754	0.0797911	0.367482	0.73175	0.912688	0.564029	0.999133	0.258038	0.19526	0.123209	0.941333	0.978447	0.987876
Limb Muscle - B cell	0.781326	-5.62926e-09	7.24786e-09	FALSE	0.0929257	0.51123	0.544098	0.170887	0.504468	0.970263	0.373303	0.396006	0.00234088	0.638869	0.381294	0.0159478	0.997197	0.397081	0.957579	0.999253	0.00201243	0.649266	0.00148115	0.876986	0.929705	0.8431	0.00483554	0.129403	6.36421e-06	0.455188	0.000915717	0.000140523	0.166214	0.0587853	0.525927	0.489465	0.0161541	0.769091	0.0184561	0.963179	0.471133	0.950683
Marrow - monocyte	0.785869	-4.23929e-09	5.35149e-09	FALSE	0.0537768	0.781605	0.484836	0.111562	0.0143878	0.512112	0.247267	0.756437	0.280217	0.94027	0.953279	0.193935	0.576153	0.866805	0.279249	0.947233	0.0365761	0.0744762	0.290407	0.335239	0.181863	0.303489	0.124383	0.757894	0.027094	0.735733	0.0710605	0.0925937	0.780624	0.701678	0.505846	0.875109	0.461424	0.949481	0.0157007	0.512432	0.314706	0.934887
Large Intestine - large intestine goblet cell	0.796576	-3.04353e-09	3.66932e-09	FALSE	0.209601	0.710175	0.806535	0.477843	0.0404427	0.532117	0.839272	0.881526	0.681505	0.974256	0.959981	0.901818	0.112986	0.692464	0.0118157	0.997427	0.392497	0.979747	0.848926	0.244538	0.00978742	0.885163	0.154827	0.991049	0.494707	0.995894	0.0890859	0.544126	0.907577	0.990625	0.831319	0.994195	0.507273	0.240337	0.277905	0.999969	0.99967	0.98676
Mammary Gland - basal cell	0.800274	-4.08879e-09	4.8526e-09	FALSE	0.213957	0.782533	0.597769	0.164104	0.48512	0.0295288	0.926289	0.848146	0.394745	0.984659	0.90615	0.60401	0.703248	0.507608	0.942035	0.282823	0.0913007	0.52181	0.987111	0.119624	0.100544	0.216424	0.470897	0.479095	0.608929	0.977674	0.275152	0.730366	0.951002	0.620771	0.184901	0.970141	0.329298	0.78892	0.304135	0.334653	0.402714	0.892673
Lung - stromal cell	0.804039	-3.58299e-09	4.18507e-09	FALSE	0.942436	0.976682	0.778297	0.920796	0.951027	0.378864	0.17259	0.354814	0.0410996	0.968255	0.0276113	0.999899	0.237248	0.0506631	0.957336	5.80158e-05	0.0554013	0.441666	0.999892	0.205498	0.185705	0.264799	0.990906	0.98262	0.490128	0.997615	0.853866	0.988791	0.995713	0.707265	0.537872	0.00472879	0.234783	0.949546	0.144903	0.119384	0.0164601	0.992787
Trachea - endothelial cell	0.815268	-4.7388e-09	5.28014e-09	FALSE	0.13415	0.27772	0.890202	0.697926	0.686748	0.190841	0.0434225	0.0962305	0.270525	0.136172	0.00456288	0.466586	0.999187	0.700788	0.431939	0.170391	0.106262	0.238584	0.0866568	0.189574	0.30033	0.183042	0.338792	0.270485	0.304336	0.587751	0.731029	0.22503	0.2853	0.269236	0.629063	0.0131379	0.111427	0.870611	0.0497669	0.477218	0.0996154	0.506567
Liver - Kupffer cell	0.82774	-6.91193e-09	7.3121e-09	FALSE	0.090444	0.316046	0.957773	0.473489	0.986489	0.152211	0.311134	0.701585	0.942849	0.904615	0.818379	0.962702	0.0836026	0.560614	0.175861	0.699788	0.448676	0.512852	0.98451	0.0441722	0.0266017	0.0115808	0.00890932	0.610056	0.0472571	0.573686	0.240442	0.373862	0.636973	0.874589	0.432249	0.811163	0.536958	0.650717	0.285215	0.900129	0.665116	0.575592
Brain - endothelial cell	0.832223	-4.63377e-09	4.81187e-09	FALSE	0.27091	0.976819	0.493949	0.975829	0.958399	0.0781042	0.0441978	0.583704	0.948763	0.988096	0.007739	0.997009	0.685197	0.59146	0.550596	0.126761	0.650942	0.466364	0.994419	0.169769	0.257407	0.2723	0.574258	0.962213	0.904103	0.988607	0.934714	0.978994	0.264573	0.784093	0.933191	0.0261529	0.64179	0.982944	0.367868	0.948055	0.343519	0.945224
Heart - erythrocyte	0.839856	-4.93124e-09	4.96167e-09	FALSE	0.552124	0.931832	0.660574	0.303216	0.0585427	0.933094	0.922526	0.264338	0.961861	0.178622	0.950171	0.951331	0.952487	0.187597	0.317974	0.997857	0.78327	0.232529	0.716403	0.88395	0.946872	0.695865	0.145339	0.553824	0.83701	0.210909	0.384176	0.775568	0.687765	0.986944	0.69639	0.957521	0.639098	0.974152	0.51192	0.999585	0.999319	0.840193
Skin - stem cell of epidermis	0.848913	-5.10141e-09	4.94427e-09	FALSE	0.251323	0.678309	0.0463607	0.230945	0.473564	0.33741	0.495296	0.931342	0.723045	0.979391	0.844338	0.354755	0.304244	0.956725	0.460719	0.762822	0.374787	0.192653	0.649074	0.112938	0.580823	0.0933307	0.596197	0.791094	0.889512	0.992037	0.273007	0.445511	0.884883	0.919025	0.917667	0.863317	0.340372	0.362492	0.223146	0.934406	0.794078	0.924619
Limb Muscle - lymphocyte	0.85995	-8.3107e-09	7.69441e-09	FALSE	0.403948	0.963655	0.450747	0.908329	0.169946	0.957339	0.768147	0.00207421	0.000440933	0.11152	0.713863	0.0447739	0.610828	0.5766	0.531704	0.990342	0.000450178	0.922533	0.0223349	0.418959	0.756227	0.701283	8.70327e-06	0.490242	3.41986e-06	0.466143	0.000164447	1.34424e-07	0.181282	0.358722	0.671506	0.922816	0.00768935	0.958114	0.00698248	0.826328	0.568876	0.920525
Liver - endothelial cell of hepatic sinusoid	0.862187	-5.57086e-09	5.10995e-09	FALSE	0.108774	0.00819285	0.965304	0.773059	0.473878	0.0196391	0.0799669	0.908507	0.569656	0.573885	0.0103171	0.688035	0.720059	0.605198	0.39605	0.252135	0.647283	0.67092	0.519383	0.348178	0.169984	0.0197763	0.823692	0.793171	0.302416	0.342724	0.645061	0.94861	0.161545	0.421746	0.303206	0.0251382	0.476242	0.336406	0.595028	0.653278	0.12894	0.382674
Pancreas - endothelial cell	0.862372	-6.29456e-09	5.76934e-09	FALSE	0.216032	0.183922	0.796123	0.828512	0.525658	0.202711	0.00656702	0.630758	0.743491	0.42032	0.000269701	0.849492	0.958489	0.625396	0.237672	0.241279	0.67767	0.412249	0.814412	0.315607	0.404522	0.354058	0.782659	0.723909	0.918852	0.764459	0.968166	0.900382	0.555915	0.255058	0.720674	0.00418003	0.429987	0.60668	0.560941	0.517771	0.108353	0.869556
Limb Muscle - T cell	0.864111	-6.4065e-09	5.82951e-09	FALSE	0.921825	0.355583	0.435201	0.251865	0.0263864	0.959045	0.713817	0.000462424	0.00240563	0.189853	0.947428	0.0889973	0.521818	0.61922	0.425991	0.816305	0.00410183	0.520275	0.0324116	0.95513	0.984429	0.974949	0.00170272	0.163559	2.18661e-06	0.349151	0.00802912	0.00335258	0.808514	0.25727	0.680555	0.999911	0.00588072	0.899511	0.0106836	0.992432	0.953087	0.462587
Heart - leukocyte	0.864434	-6.10948e-09	5.55176e-09	FALSE	0.0283792	0.241506	0.183629	0.0819214	0.387845	0.804491	0.166739	0.00821682	0.00308628	0.650026	0.220509	0.871412	0.878847	0.987556	0.732871	0.999839	0.0133088	0.563627	0.734411	0.0379858	0.0412136	0.420878	0.00115306	0.637025	0.00268202	0.63797	0.0439307	0.149247	0.957584	0.429007	0.849822	0.180072	0.0538777	0.998896	0.0243442	0.724478	0.288611	0.722825
Marrow - regulatory T cell	0.876425	-7.76354e-09	6.70833e-09	FALSE	0.866562	0.382869	0.208632	0.742107	0.201602	0.999137	0.805914	0.00202036	0.00496382	0.667944	0.919958	0.523377	0.544265	0.894937	0.14096	0.950066	0.000197447	0.814981	0.265791	0.514048	0.885581	0.866655	0.000602277	0.834164	7.92369e-06	0.749783	0.00234048	0.00108124	0.165348	0.980797	0.712872	0.981467	0.00348713	0.722473	0.00338223	0.841662	0.680859	0.750369
Lung - myeloid cell	0.879116	-7.3087e-09	6.24367e-09	FALSE	0.246572	0.899566	0.27951	0.839995	0.147352	0.454143	0.731087	0.00743724	0.00350397	0.641648	0.909581	0.246573	0.761723	0.622347	0.2468	0.95386	0.00120225	0.67433	0.179868	0.28149	0.745973	0.45939	0.00677296	0.100007	0.000522867	0.383963	0.00936541	0.0222231	0.870912	0.543455	0.366661	0.78544	0.0653212	0.928964	0.0086402	0.74587	0.399679	0.839931
Marrow - precursor B cell	0.881855	-5.22552e-09	4.41229e-09	FALSE	0.0104594	0.96382	0.79225	0.960155	0.0096243	0.0990297	0.030095	0.0920194	0.09276	0.536396	0.0615625	0.0645788	0.868986	0.880295	0.563008	0.906925	0.0801518	0.514465	0.136576	0.168193	0.37192	0.343531	0.0309638	0.470941	1.83479e-05	0.398723	0.0136218	0.000143194	0.190276	0.169505	0.0485355	0.0499253	0.0490002	0.056703	0.226919	0.858141	0.437564	0.907664
Thymus - DN1 thymic pro-T cell	0.891295	-8.12698e-09	6.58886e-09	FALSE	0.72286	0.725408	0.119449	0.721767	0.170509	0.958883	0.999586	0.0136324	0.0508362	0.636168	0.997121	0.771459	0.945779	0.66748	0.0870004	0.829583	0.00538769	0.826348	0.836056	0.68562	0.390215	0.985978	0.00041303	0.924809	8.79442e-05	0.890743	0.00239694	0.000887521	0.999081	0.905506	0.503879	1	7.5621e-06	0.877747	0.0128228	0.978155	0.911866	0.981726
Fat - myeloid cell	0.908078	-7.29607e-09	5.48983e-09	FALSE	0.0489831	0.820528	0.444688	0.0584005	0.440955	0.428555	0.422019	0.0603963	0.00214428	0.48664	0.99078	0.683882	0.990579	0.432098	0.54809	0.997829	0.00113327	0.381313	0.657806	0.0385637	0.011188	0.0489074	0.00656203	0.617185	0.000520794	0.673442	0.024872	0.025038	0.99078	0.838295	0.388832	0.968689	0.23046	0.985632	0.00701128	0.875959	0.642043	0.990706
Limb Muscle - endothelial cell	0.909267	-7.33072e-09	5.48602e-09	FALSE	0.167165	0.455001	0.784063	0.985363	0.793957	0.245162	0.0237486	0.286063	0.512842	0.495561	0.00036104	0.866711	0.999823	0.869541	0.616219	0.358721	0.143634	0.340642	0.769438	0.280548	0.529966	0.276263	0.545456	0.729913	0.260959	0.934791	0.69919	0.781288	0.489192	0.49548	0.753985	0.00293252	0.38699	0.787144	0.120743	0.579998	0.103702	0.687158
Lung - lung endothelial cell	0.910499	-6.00456e-09	4.46823e-09	FALSE	0.131655	0.121724	0.626636	0.97915	0.681205	0.0681247	0.00228704	0.459142	0.699123	0.425783	0.000499291	0.926836	0.684581	0.908221	0.401323	0.227367	0.752975	0.37393	0.947866	0.11371	0.813278	0.213633	0.60015	0.684284	0.809	0.669446	0.981998	0.661528	0.810475	0.521334	0.559431	0.0057194	0.987424	0.346046	0.858147	0.401124	0.0686137	0.851547
Kidney - epithelial cell of proximal tubule	0.913599	-7.3323e-09	5.37852e-09	FALSE	0.57466	0.484246	0.963307	0.167244	0.573833	0.080459	0.261562	0.942927	0.90241	0.787607	0.385324	0.954098	0.192447	0.293307	0.0589835	0.857433	0.926735	0.454368	0.983697	0.0584222	0.0464857	0.184379	0.356828	0.859314	0.396921	0.994481	0.0758675	0.96162	0.936365	0.90578	0.961761	0.429897	0.58106	0.596743	0.416526	0.687143	0.351129	0.997389
Skin - leukocyte	0.915946	-1.02882e-08	7.46436e-09	FALSE	0.208177	0.628095	0.113689	0.39651	0.93311	0.865527	0.665769	0.783611	0.153108	0.704288	0.999684	0.990759	0.855534	0.372819	0.268805	0.719452	0.0605096	0.791224	0.898556	0.85778	0.346596	0.274888	0.303669	0.547889	0.847628	0.856411	0.259111	0.72305	0.782413	0.945822	0.710176	0.999697	0.102774	0.735308	0.142962	0.175206	0.326045	0.789439
Heart - cardiac muscle cell	0.922636	-6.07201e-09	4.26696e-09	FALSE	0.736084	0.862758	0.0642535	0.257154	0.0891021	0.24249	0.205654	0.882001	0.91948	0.71084	0.0270215	0.344777	0.291814	0.175065	0.212173	0.998772	0.642904	0.142511	0.192195	0.317443	0.59344	0.109108	0.256581	0.323042	0.420788	0.47122	0.636288	0.516528	0.365484	0.202214	0.388587	0.0828814	0.442865	0.220844	0.307739	0.662401	0.881067	0.844424
Mammary Gland - endothelial cell	0.927375	-9.73384e-09	6.68297e-09	FALSE	0.16527	0.156644	0.446265	0.844485	0.705857	0.326249	0.0383141	0.53364	0.129439	0.78134	0.00237773	0.76002	0.985358	0.86666	0.815756	0.290422	0.0885771	0.635348	0.789712	0.214979	0.196289	0.654553	0.672016	0.549505	0.282038	0.993797	0.607706	0.604259	0.277127	0.4456	0.712399	0.0198489	0.100001	0.372807	0.203946	0.410518	0.0736623	0.923435
Tongue - basal cell of epidermis	0.952814	-6.54169e-09	3.91068e-09	FALSE	0.33942	0.663627	0.171662	0.252425	0.512231	0.169677	0.691629	0.71494	0.464697	0.490952	0.872866	0.450402	0.890647	0.480089	0.386792	0.140533	0.311627	0.0468173	0.86471	0.177009	0.68751	0.402171	0.175422	0.77919	0.456106	0.858698	0.112113	0.306623	0.528971	0.983431	0.77969	0.828407	0.23819	0.291344	0.330774	0.969054	0.777318	0.855349
Lung - ciliated columnar cell of tracheobronchial tree	0.969583	-8.3737e-09	4.4667e-09	FALSE	0.78933	0.309591	0.581121	0.807276	0.284356	0.268902	0.633642	0.201991	0.975679	0.974755	0.974222	0.800623	0.695813	0.745614	0.986092	0.999992	0.925724	0.576326	0.781598	0.624618	0.756755	0.652975	0.302632	0.963785	0.889446	0.992307	0.968684	0.211381	0.32478	0.831525	0.931572	0.954095	0.328526	0.825198	0.854699	0.964033	0.882796	0.971754
Large Intestine - enterocyte of epithelium of large intestine	0.974822	-8.11159e-09	4.14507e-09	FALSE	0.147097	0.202644	0.886675	0.574975	0.595955	0.434982	0.444609	0.914159	0.926094	0.875789	0.600643	0.999886	0.372283	0.660038	0.0384835	0.998458	0.538098	0.928519	0.935897	0.454381	0.0247058	0.710019	0.500631	0.978876	0.939626	0.999318	0.28476	0.876959	0.990189	0.995916	0.775592	0.881149	0.730441	0.190697	0.0675095	0.999619	0.999988	0.997258
Skin - epidermal cell	0.977678	-8.54488e-09	4.25542e-09	FALSE	0.246227	0.545379	0.189748	0.25369	0.65533	0.0862396	0.85327	0.463844	0.0614872	0.875858	0.99469	0.892262	0.862038	0.879435	0.365201	0.999857	0.0381236	0.350346	0.912104	0.0327036	0.496383	0.512116	0.199176	0.768461	0.792991	0.989741	0.134531	0.341866	0.942842	0.996305	0.299497	0.999305	0.0838588	0.553487	0.351387	0.788068	0.744099	0.988964
Liver - hepatocyte	0.979411	-1.06204e-08	5.20163e-09	FALSE	0.109189	0.931299	0.544221	0.296546	0.835014	0.461079	0.350237	0.999833	0.951787	0.646312	0.693083	0.998896	0.0188328	0.19101	0.0597314	0.998902	0.915227	0.615572	0.75361	0.0151603	0.000374725	0.0096895	0.930583	0.942646	0.972627	0.97226	0.550584	0.80182	0.973833	0.976485	0.973367	0.900356	0.941821	0.0792691	0.605664	0.96314	0.827216	0.975473
Heart - fibroblast	0.981572	-8.69729e-09	4.16666e-09	FALSE	0.742907	0.973132	0.925627	0.770491	0.975897	0.251382	0.622081	0.163639	0.650106	0.955422	0.0666375	0.993704	0.677051	0.710824	0.945838	0.000846386	0.364644	0.457607	0.997445	0.360118	0.426262	0.0608034	0.882546	0.900448	0.573302	0.999732	0.711786	0.819792	0.838437	0.982763	0.129025	0.0976508	0.751649	0.980545	0.382108	0.144377	0.0457976	0.998268
Heart - professional antigen presenting cell	0.983426	-9.22141e-09	4.3287e-09	FALSE	0.00485934	0.72025	0.648609	0.489103	0.758117	0.887762	0.942018	0.0542075	0.454823	0.0853743	0.996773	0.582141	0.99425	0.184664	0.827001	0.999036	0.0125834	0.685424	0.1439	0.317975	0.966578	0.674931	0.0456499	0.0548406	0.00109228	0.158879	0.0582993	0.117857	0.695203	0.83702	0.231307	0.985975	0.0419567	0.999147	0.00158453	0.995442	0.974416	0.781113
Large Intestine - Brush cell of epithelium proper of large intestine	0.984473	-1.09688e-08	5.08668e-09	FALSE	0.602901	0.552203	0.329516	0.981335	0.932686	0.692361	0.855724	0.844406	0.622546	0.279696	0.973713	0.831093	0.833156	0.834153	0.474517	0.999549	0.348925	0.108985	0.717114	0.929637	0.949913	0.963842	0.506624	0.693145	0.844826	0.975955	0.441058	0.891819	0.993409	0.678661	0.689767	0.79927	0.882928	0.869301	0.222485	0.994918	0.991731	0.98105
Large Intestine - epithelial cell of large intestine	0.986047	-9.11302e-09	4.14492e-09	FALSE	0.137317	0.704585	0.760184	0.784489	0.413323	0.0251751	0.182376	0.994041	0.926436	0.99183	0.580052	0.976622	0.0455181	0.43036	0.0203026	0.831255	0.652685	0.964887	0.965457	0.29491	0.0771234	0.562561	0.348552	0.994032	0.898676	0.999999	0.189039	0.626343	0.98853	0.995403	0.942135	0.471623	0.208802	0.0244387	0.176756	0.970839	0.738372	0.999998
Fat - endothelial cell	0.990133	-1.06176e-08	4.55422e-09	FALSE	0.207475	0.294722	0.462158	0.901399	0.674035	0.391722	0.00128403	0.675798	0.834852	0.842555	2.57e-05	0.949897	0.887787	0.929662	0.575883	0.403837	0.733058	0.237507	0.941335	0.125144	0.354946	0.151376	0.929313	0.787931	0.973223	0.949533	0.899469	0.965184	0.503636	0.901193	0.862814	0.0026953	0.530536	0.72901	0.421389	0.726519	0.179041	0.841137
Skin - basal cell of epidermis	0.991256	-9.18445e-09	3.86506e-09	FALSE	0.205057	0.325839	0.0116351	0.308302	0.436918	0.00530586	0.10857	0.705396	0.0861453	0.992447	0.584933	0.348708	0.900765	0.910909	0.311709	0.939706	0.0208793	0.461486	0.463699	0.396568	0.557024	0.660665	0.0538567	0.836866	0.801116	0.995344	0.626462	0.519135	0.861745	0.988791	0.541801	0.325147	0.0586838	0.669688	0.204476	0.78344	0.783138	0.952803
Limb Muscle - macrophage	0.992545	-1.65061e-08	6.77995e-09	FALSE	0.0911847	0.891468	0.416618	0.840223	0.812052	0.433662	0.400568	0.107799	0.0531973	0.453539	0.929286	0.617266	0.867187	0.780231	0.70699	0.997895	0.00511971	0.75007	0.574862	0.0242718	0.125837	0.281768	0.344443	0.706228	0.0496372	0.723932	0.153834	0.350172	1	0.846994	0.812819	0.749544	0.042387	0.999992	0.00648026	0.62906	0.416325	0.990151
Heart - endocardial cell	0.996935	-1.15127e-08	4.20052e-09	FALSE	0.201952	0.116862	0.656623	0.979269	0.514345	0.367441	0.191348	0.976852	0.915754	0.997956	0.0409511	0.705891	0.643119	0.60317	0.559816	0.00798212	0.910636	0.550941	0.991477	0.402477	0.172038	0.334639	0.681151	0.74886	0.575602	0.977665	0.632674	0.909268	0.403259	0.30557	0.909842	0.100891	0.806471	0.918721	0.853886	0.974918	0.308232	0.747694
Limb Muscle - mesenchymal stem cell	0.997578	-1.08059e-08	3.83563e-09	FALSE	0.392888	0.996382	0.919339	0.428054	0.997276	0.472687	0.51507	0.07981	0.143947	0.966126	0.339967	0.927229	0.777707	0.369291	0.983265	1.37465e-05	0.00772525	0.483291	0.968046	0.182145	0.232571	0.0372016	0.568578	0.904663	0.0811309	0.91932	0.901555	0.438072	0.99365	0.98849	0.373601	0.0955123	0.0811487	0.831499	0.0159344	0.0124773	8.85229e-05	0.925261
Mammary Gland - stromal cell	0.998296	-1.19517e-08	4.08149e-09	FALSE	0.561125	0.977397	0.706533	0.0336866	0.999762	0.875921	0.726619	0.0967446	0.262067	0.93401	0.340295	0.830917	0.79758	0.835987	0.986795	0.000305866	0.0129936	0.605752	0.971946	0.333592	0.300112	0.241628	0.292816	0.990944	0.316146	0.917891	0.517919	0.334787	0.995628	0.882087	0.429009	0.118217	0.572662	0.984492	0.0192006	0.126829	0.0029562	0.931019
Bladder - bladder urothelial cell	0.998971	-1.22423e-08	3.97237e-09	FALSE	0.239428	0.723163	0.434381	0.976255	0.437106	0.355121	0.729771	0.586376	0.465874	0.655778	0.721219	0.997777	0.688615	0.855279	0.107843	0.98534	0.308396	0.404245	0.99668	0.0370517	0.0335877	0.24824	0.193892	0.944482	0.790094	0.98991	0.269733	0.298825	0.984683	0.950756	0.874623	0.808074	0.649789	0.0510278	0.213493	0.988727	0.989485	0.996232
Heart - endothelial cell	0.999246	-1.45703e-08	4.59168e-09	FALSE	0.157357	0.361074	0.796101	0.915346	0.735229	0.260259	0.011299	0.402223	0.920141	0.587171	0.00100622	0.972953	0.882248	0.68797	0.189793	0.512098	0.715038	0.35305	0.896115	0.220946	0.665254	0.1222	0.633805	0.309808	0.992999	0.849277	0.952492	0.919558	0.234074	0.810333	0.795324	0.0206171	0.812639	0.936493	0.348048	0.838128	0.324516	0.728182
