# Supplementary material for: Genetic mapping of etiologic brain cell types for obesity
Source: eLife. 2020 Sep 21;9:e55851. doi: 10.7554/eLife.55851 (PMC7505664; doi:10.7554/eLife.55851)
Supplement: Figure 3—source data 1. [file elife-55851-fig3-data1.xlsx]

## Sheet: 3 - MNS metadata
Mouse Nervous System metadata
Annotation	Class	Description	Probable location	Region	TaxonomyRank	Neurotransmitter	Neurotransmitter_class	Ncells	No. ES genes DET	No. ES genes GES	No. ES genes NSI	No. ES genes EP	No. ES genes ESmu
ABC	Vascular	Vascular leptomeningeal cells	Pia/meninges surface	CNS	Vascular	NA	Non-neuron	137	2701	2477	1265	2351	3275
ACBG	Astrocytes	Bergmann glia	Cerebellum	Cerebellum	Astrocytes	NA	Non-neuron	921	1502	1056	2126	2170	2689
ACMB	Astrocytes	Dorsal midbrain Myoc-expressing astrocyte-like	Dorsal midbrain	Midbrain dorsal	Astrocytes	NA	Non-neuron	861	2939	2126	2169	2588	3717
ACNT1	Astrocytes	Non-telencephalon astrocytes, protoplasmic	Non-telencephalon	Hypothalamus,Thalamus,Midbrain dorsal,Midbrain ventral,Pons,Medulla,Spinal cord	Astrocytes	NA	Non-neuron	6642	1721	1343	2414	3364	4080
ACNT2	Astrocytes	Non-telencephalon astrocytes, fibrous	Non-telencephalon	Hypothalamus,Thalamus,Midbrain dorsal,Midbrain ventral,Pons,Medulla,Spinal cord	Astrocytes	NA	Non-neuron	2568	2131	1603	2543	2875	3620
ACOB	Astrocytes	Olfactory astrocytes	Olfactory bulb periglomerular layer	Olfactory bulb	Astrocytes	NA	Non-neuron	1438	2422	1796	2330	2574	3421
ACTE1	Astrocytes	Telencephalon astrocytes, fibrous	Telencephalon	Telencephalon	Astrocytes	NA	Non-neuron	2974	2098	1610	2225	2476	3271
ACTE2	Astrocytes	Telencephalon astrocytes, protoplasmic	Telencephalon	Telencephalon	Astrocytes	NA	Non-neuron	3973	2002	1468	2484	2877	3587
CBGRC	Neurons	Granule neurons, cerebellum	Cerebellum	Cerebellum	Hindbrain neurons	Glutamate (VGLUT1)	Excitatory	4193	616	419	2257	1843	2546
CBINH1	Neurons	Molecular layer interneurons, cerebellum	Cerebellum, molecular layer	Cerebellum	Hindbrain neurons	GABA, Nitric oxide	Inhibitory	662	1537	920	1565	1524	2221
CBINH2	Neurons	Granular layer interneurons, cerebellum	Cerebellum, granular layer	Cerebellum	Hindbrain neurons	GABA, Glycine (GLYT2)	Inhibitory	17	1297	920	436	814	1530
CBNBL1	Neurons	Neuroblasts, cerebellum	Hindbrain (pons, medulla cerabellum)	Pons,Medulla,Cerebellum	Neuroblasts	Glutamate (VGLUT2)	Excitatory	163	1462	732	859	878	1774
CBNBL2	Neurons	Neuroblasts, cerebellum	Cerabellum	Cerebellum	Hindbrain neurons	NA	Missing neurotransmitter	293	567	320	1649	1293	1681
CBPC	Neurons	Purkinje cells	Cerebellum, border of granular layer and molecular layer	Cerebellum	Hindbrain neurons	GABA	Inhibitory	84	927	741	1069	1397	1547
CHOR	Ependymal	Chorid plexus epithelial cells	Medulla,Thalamus	Medulla,Thalamus	Other CNS glia	NA	Non-neuron	458	3818	3582	1869	2943	4424
COP1	Oligos	Committed oligodendrocytes cells (COP)	CNS	CNS	Oligodendrocytes	NA	Non-neuron	1532	3292	2220	2026	2376	4135
COP2	Oligos	Committed oligodendrocytes cells (COP), pons/medulla specific	Pons/medulla (possible batch effect)	CNS	Oligodendrocytes	NA	Non-neuron	254	2448	1678	1627	2079	2949
CR	Neurons	Cajal-Retzius cells, hippocampus	Dentate gyrus molecular layer	Dentate gyrus	Di- and mesencephalon excitatory neurons	Glutamate (VGLUT2)	Excitatory	222	1712	803	894	1078	2140
DECHO1	Neurons	Cholinergic neurons, septal nucleus, Meissnert and diagonal band	Medial septal nuclues, diagonal band nucleus and nucleus basalis of Meissnert	Hypothalamus	Cholinergic and monoaminergic neurons	Acetylcholine, Glutamate (VGLUT3), Nitric oxide	Excitatory	114	4790	5846	454	992	6246
DECHO2	Neurons	Cholinergic neurons, habenula	Habenula	Thalamus	Di- and mesencephalon excitatory neurons	Acetylcholine,Glutamate (VGLUT1,VGLUT3)	Excitatory	207	3173	1902	679	701	3424
DEGLU1	Neurons	Excitatory neurons, thalamus	Posterior thalamus	Thalamus	Di- and mesencephalon excitatory neurons	Glutamate (VGLUT1,VGLUT2)	Excitatory	1058	6713	6877	1294	2119	7398
DEGLU2	Neurons	Excitatory neurons, hypothalamus	Subparafascicular nucleus	Hypothalamus	Di- and mesencephalon excitatory neurons	Glutamate (VGLUT1,VGLUT2)	Excitatory	257	5825	6609	684	1046	6856
DEGLU3	Neurons	Excitatory neurons, thalamus	Paraventricular nucleus of the thalamus	Thalamus	Di- and mesencephalon excitatory neurons	Glutamate (VGLUT2)	Excitatory	1113	6304	5811	1153	1720	6837
DEGLU4	Neurons	Excitatory neurons, thalamus	Parafascicular nucleus	Thalamus	Di- and mesencephalon excitatory neurons	Glutamate (VGLUT2)	Excitatory	101	3834	3339	377	802	4238
DEGLU5	Neurons	Excitatory neurons, midbrain	Anterior pretectal nucleus	Midbrain dorsal	Di- and mesencephalon excitatory neurons	Glutamate (VGLUT1)	Excitatory	426	4949	3810	649	876	5317
DEINH1	Neurons	Inhibitory neurons, thalamus	Reticular nucleus of the thalamus (Sst low)	Thalamus	Telencephalon inhibitory interneurons	GABA	Inhibitory	339	4580	3647	611	775	4902
DEINH2	Neurons	Inhibitory neurons, thalamus	Reticular nucleus of the thalamus	Thalamus	Telencephalon inhibitory interneurons	GABA	Inhibitory	167	3892	2855	498	743	4181
DEINH3	Neurons	Inhibitory neurons, hypothalamus	Subthalamic nucleus	Hypothalamus	Di- and mesencephalon inhibitory neurons	GABA	Inhibitory	323	5359	4751	614	1149	5795
DEINH4	Neurons	Inhibitory neurons, thalamus	Paraventricular nucleus of the thalamus (best fit) but do not fit with Nmu expression	Thalamus	Peptidergic neurons	GABA, Nitric oxide	Inhibitory	57	2948	2083	380	704	3228
DEINH5	Neurons	Peptidergic neurons, hypothalamus	Medial preoptic nucleus, Bed nuclei of the stria terminalis anterior division	Hypothalamus	Peptidergic neurons	GABA	Inhibitory	308	3794	2294	690	770	4161
DEINH6	Neurons	Peptidergic neurons, hypothalamus	Arcuate hypothalamic nucleus (probably, Npy, Agrp cells)	Hypothalamus	Peptidergic neurons	GABA	Inhibitory	12	1394	697	406	661	1549
DEINH7	Neurons	Inhibitory neurons, hypothalamus	Suprachiasmatic nucleus, Medial preoptic nucleus	Hypothalamus	Peptidergic neurons	GABA	Inhibitory	182	981	477	1012	934	1480
DEINH8	Neurons	Inhibitory neurons, hypothalamus	Suprachiasmatic nucleus, Medial preoptic nucleus	Hypothalamus	Peptidergic neurons	GABA	Inhibitory	120	1334	589	673	695	1591
DETPH	Neurons	Neuroblast-like, habenula	Medial habenula	Thalamus	Neuroblasts	NA	Missing neurotransmitter	7	1202	780	535	714	1338
DGGRC1	Neurons	Granule neuroblasts, dentate gyrus	Dentate gyrus	Dentate gyrus	Other CNS neurons	Glutamate (VGLUT1)	Excitatory	983	3354	2139	1552	1513	3944
DGGRC2	Neurons	Granule neurons, dentate gyrus	Dentate gyrus	Dentate gyrus	Other CNS neurons	Glutamate (VGLUT1)	Excitatory	3385	3539	2258	1752	1947	4380
DGNBL1	Neurons	Granule neuroblasts, dentate gyrus	Dentate gyrus	Dentate gyrus	Neuroblasts	NA	Missing neurotransmitter	159	2004	965	1106	1306	2398
DGNBL2	Neurons	Granule neuroblasts, dentate gyrus	Dentate gyrus	Dentate gyrus	Neuroblasts	NA	Missing neurotransmitter	1445	2426	1674	1796	1937	3270
ENMFB	Vascular	Enteric mesothelial fibroblasts	Enteric nervous system	Enteric nervous system	Enteric glia	NA	Non-neuron	49	2649	2199	857	1780	3057
ENT1	Neurons	Nitrergic enteric neurons	Myenteric plexus of small intestine	Enteric nervous system	Enteric neurons	Nitric oxide	Nitric oxide	14	1923	2890	220	807	3198
ENT2	Neurons	Nitrergic enteric neurons	Myenteric plexus of small intestine	Enteric nervous system	Enteric neurons	Nitric oxide	Nitric oxide	107	4769	6396	508	1460	6709
ENT3	Neurons	Nitrergic enteric neurons	Myenteric plexus of small intestine	Enteric nervous system	Enteric neurons	Nitric oxide	Nitric oxide	155	4325	5110	781	1764	5550
ENT4	Neurons	Cholinergic enteric neurons	Myenteric plexus of small intestine	Enteric nervous system	Enteric neurons	Acetylcholine	Acetylcholine	155	4455	4613	922	1875	5284
ENT5	Neurons	Cholinergic enteric neurons	Myenteric plexus of small intestine	Enteric nervous system	Enteric neurons	Acetylcholine	Acetylcholine	259	3469	3446	1124	1582	4145
ENT6	Neurons	Cholinergic enteric neurons	Myenteric plexus of small intestine	Enteric nervous system	Enteric neurons	Acetylcholine	Acetylcholine	118	3744	4193	638	1290	4716
ENT7	Neurons	Cholinergic enteric neurons, VGLUT2	Myenteric plexus of small intestine	Enteric nervous system	Enteric neurons	Glutamate (VGLUT2),Acetylcholine	Excitatory	31	2868	3405	274	976	3891
ENT8	Neurons	Cholinergic enteric neurons, VGLUT2	Myenteric plexus of small intestine	Enteric nervous system	Enteric neurons	Glutamate (VGLUT2),Acetylcholine	Excitatory	97	3604	5573	466	1315	5920
ENT9	Neurons	Cholinergic enteric neurons	Myenteric plexus of small intestine	Enteric nervous system	Enteric neurons	Acetylcholine	Acetylcholine	169	4498	6260	849	2137	6487
ENTG1	PeripheralGlia	Enteric glia, proliferating	Enteric nervous system	Enteric nervous system	Enteric glia	NA	Non-neuron	163	4367	4436	1380	2744	4994
ENTG2	PeripheralGlia	Enteric glia	Enteric nervous system	Enteric nervous system	Enteric glia	NA	Non-neuron	2160	3393	2919	2796	3130	4411
ENTG3	PeripheralGlia	Enteric glia	Enteric nervous system	Enteric nervous system	Enteric glia	NA	Non-neuron	1135	3896	3292	2508	2765	4555
ENTG4	PeripheralGlia	Enteric glia	Enteric nervous system	Enteric nervous system	Enteric glia	NA	Non-neuron	4044	4000	3504	2711	3309	5076
ENTG5	PeripheralGlia	Enteric glia	Enteric nervous system	Enteric nervous system	Enteric glia	NA	Non-neuron	1132	3604	3029	2498	2776	4346
ENTG6	PeripheralGlia	Enteric glia	Enteric nervous system	Enteric nervous system	Enteric glia	NA	Non-neuron	811	3557	2934	2328	2559	4186
ENTG7	PeripheralGlia	Enteric glia	Enteric nervous system	Enteric nervous system	Enteric glia	NA	Non-neuron	1041	4072	3319	2396	2925	4815
EPEN	Ependymal	Ependymal cells	Brain	Brain	Other CNS glia	NA	Non-neuron	774	5629	5225	2179	3761	6104
EPMB	Ependymal	Ependymal cells, midbrain	Dorsal midbrain pia	Midbrain dorsal	Other CNS glia	NA	Non-neuron	69	1714	1191	934	1824	2166
EPSC	Ependymal	Ependymal cells, spinal cord	Spinal cord	Spinal cord	Other CNS glia	NA	Non-neuron	414	3282	2877	1809	2655	3869
HBADR	Neurons	Adrenergic cell groups of the medulla	Nucleus of the solitary tract, adrenergic cell groups C1-3	Medulla	Cholinergic and monoaminergic neurons	Adrenaline, Glutamate (VGLUT3)	Excitatory	40	3404	2899	304	893	3888
HBCHO1	Neurons	Cholinergic neurons, hindbrain	Medulla (several nuclei)	Medulla	Hindbrain neurons	Acetylcholine,Glutamate (VGLUT2)	Excitatory	10	2348	2687	223	670	3178
HBCHO2	Neurons	Cholinergic neurons, hindbrain	Medial pontine nuclei, reticulotegmental nuclei	Pons	Hindbrain neurons	Acetylcholine, Glutamate (VGLUT2), Nitric oxide	Excitatory	22	4025	5187	127	636	5461
HBCHO3	Neurons	Afferent nuclei of cranial nerves VI-XII	Afferent nuclei of cranial nerves VI-XII	Medulla	Cholinergic and monoaminergic neurons	Acetylcholine, Nitric oxide	Acetylcholine	72	5640	6929	240	1307	7208
HBCHO4	Neurons	Afferent nuclei of cranial nerves III-V	Afferent nuclei of cranial nerves III-V	Pons	Cholinergic and monoaminergic neurons	Acetylcholine, Nitric oxide	Acetylcholine	52	3973	4404	255	650	4975
HBGLU1	Neurons	Excitatory neurons, hindbrain	Inferior olivary complex	Medulla	Di- and mesencephalon excitatory neurons	Glutamate (VGLUT2, VGLUT3)	Excitatory	52	3961	3950	299	855	4686
HBGLU10	Neurons	Excitatory neurons, hindbrain	Nucleus of the solitary tract	Medulla	Spinal cord excitatory neurons	Glutamate (VGLUT2)	Excitatory	80	2296	1452	489	1103	2583
HBGLU2	Neurons	Excitatory neurons, hindbrain	Nucleus of the solitary tract	Medulla	Di- and mesencephalon excitatory neurons	Glutamate (VGLUT2), Nitric oxide	Excitatory	200	5118	5136	491	1667	5811
HBGLU3	Neurons	Excitatory neurons, hindbrain	Nucleus of the solitary tract	Medulla	Di- and mesencephalon excitatory neurons	Glutamate (VGLUT2), Nitric oxide	Excitatory	107	4003	3123	365	1095	4294
HBGLU4	Neurons	Excitatory neurons, hindbrain	Medial vestibular nucleus and Nucleus prepositus	Medulla	Hindbrain neurons	Glutamate (VGLUT2), Nitric oxide	Excitatory	7	2560	2755	194	616	3281
HBGLU5	Neurons	Excitatory neurons, hindbrain	Pontine reticular nucleus, caudal part	Pons	Hindbrain neurons	Glutamate (VGLUT1), Nitric oxide	Excitatory	130	4842	5190	495	1081	5775
HBGLU6	Neurons	Excitatory neurons, hindbrain	Pontine gray	Pons	Hindbrain neurons	Glutamate (VGLUT1,VGLUT2), Nitric oxide	Excitatory	252	5950	6393	690	1746	6783
HBGLU7	Neurons	Excitatory neurons, hindbrain	Tegmental reticular nucleus	Pons	Hindbrain neurons	Glutamate (VGLUT1,VGLUT2), Nitric oxide	Excitatory	275	5789	6023	672	1632	6459
HBGLU8	Neurons	Excitatory neurons, hindbrain	Tegmental reticular nucleus	Pons	Hindbrain neurons	Glutamate (VGLUT1,VGLUT2), Nitric oxide	Excitatory	11	3115	4373	160	692	4666
HBGLU9	Neurons	Excitatory neurons, hindbrain	Spinal nucleus of the trigeminal	Medulla	Hindbrain neurons	Glutamate (VGLUT2)	Excitatory	97	4705	4569	359	1396	5151
HBINH1	Neurons	Inhibitory neurons, hindbrain	Pons, interpeduncular and tegmental nuclei in rh1	Pons	Di- and mesencephalon inhibitory neurons	GABA, Nitric oxide	Inhibitory	13	1335	699	494	868	1540
HBINH2	Neurons	Inhibitory neurons, hindbrain	Nucleus of the solitary tract	Medulla	Hindbrain neurons	GABA, Glycine (GLYT1), Nitric oxide	Inhibitory	22	3826	4585	147	635	5031
HBINH3	Neurons	Inhibitory neurons, hindbrain	Paragigantocellular reticular nucleus	Medulla	Hindbrain neurons	GABA, Glycine (GLYT1,GLYT2)	Inhibitory	127	2855	1791	480	1120	3166
HBINH4	Neurons	Inhibitory neurons, hindbrain	Paragigantocellular reticular nucleus	Medulla	Hindbrain neurons	GABA, Glycine (GLYT1,GLYT2)	Inhibitory	75	3283	2342	376	950	3559
HBINH5	Neurons	Inhibitory neurons, hindbrain	Gigantocellular reticular nucleus	Medulla	Di- and mesencephalon inhibitory neurons	GABA, Glycine (GLYT1,GLYT2)	Inhibitory	480	6528	6671	715	2030	7152
HBINH6	Neurons	Inhibitory neurons, hindbrain	Koelliker-Fuse subnucleus	Pons	Hindbrain neurons	GABA, Glycine (GLYT1)	Inhibitory	62	4454	4348	272	938	5026
HBINH7	Neurons	Inhibitory neurons, hindbrain	Superior olivary complex	Pons	Hindbrain neurons	GABA, Glycine (GLYT1,GLYT2)	Inhibitory	25	3043	2605	235	845	3390
HBINH8	Neurons	Inhibitory neurons, hindbrain	Spinal nucleus of the trigeminal	Medulla	Hindbrain neurons	GABA, Glycine (GLYT1,GLYT2)	Inhibitory	11	2378	2225	213	540	2862
HBINH9	Neurons	Inhibitory neurons, hindbrain	Paragigantocellular reticular nucleus	Medulla	Spinal cord inhibitory neurons	GABA, Glycine (GLYT1,GLYT2)	Inhibitory	98	3341	2421	374	1023	3710
HBNOR	Neurons	Noradrenergic neurons of the medulla	A1-2 noradrenergic cell groups	Medulla	Cholinergic and monoaminergic neurons	Noradrenaline, Nitric oxide	Monoamines	23	2607	2203	276	720	2983
HBSER1	Neurons	Serotonergic neurons, hindbrain	Ventral midbrain/isthmic dorsal raphe (B7), caudal linear nucleus (B8), medial lemniscus (B9), isthmic periaqueductal grey (B4?)	Pons	Cholinergic and monoaminergic neurons	Serotonin, Glutamate (VGLUT3)	Excitatory	105	4408	4581	350	716	5174
HBSER2	Neurons	Serotonergic neurons, hindbrain	Nucleus raphe Pons (B5, B6)	Pons	Cholinergic and monoaminergic neurons	Serotonin, Glutamate (VGLUT3)	Excitatory	109	5104	5819	315	941	6157
HBSER3	Neurons	Serotonergic neurons, hindbrain	Ventral midbrain, rostral pons	Pons	Cholinergic and monoaminergic neurons	Serotonin	Monoamines	87	4027	4108	316	677	4761
HBSER4	Neurons	Serotonergic neurons, hindbrain	Nucleus raphe medulla (pallidus, oscurus, magnus, B1-3)	Medulla	Cholinergic and monoaminergic neurons	Serotonin, Glutamate (VGLUT3)	Excitatory	72	5152	5669	307	1098	6032
HBSER5	Neurons	Serotonergic neurons, hindbrain	Nucleus raphe pons (pallidus, oscurus, magnus, B1-3)	Pons	Cholinergic and monoaminergic neurons	Serotonin	Monoamines	64	4820	5392	252	867	5826
HYPEN	Ependymal	Hypendymal cell, subcommissural organ	Subcommissural organ	Subcommissural organ	Other CNS glia	NA	Non-neuron	111	2276	1636	1180	2048	2647
HYPEP1	Neurons	Peptidergic neurons, hypothalamus	Lateral hypothalamic area	Hypothalamus	Peptidergic neurons	Glutamate (VGLUT2)	Excitatory	191	3523	2191	626	825	3800
HYPEP2	Neurons	Peptidergic neurons, hypothalamus	Paraventricular hypothalamic nucleus	Hypothalamus	Peptidergic neurons	Nitric oxide	Nitric oxide	43	1892	1092	400	714	2115
HYPEP3	Neurons	Peptidergic neurons, hypothalamus	Ventromedial hypothalamic nucleus	Hypothalamus	Peptidergic neurons	Glutamate (VGLUT2), Nitric oxide	Excitatory	152	3546	2270	440	578	3805
HYPEP4	Neurons	Oxytocin-producing cells, hypothalamus	Dorsomedial nucleus of the hypothalamus. magnocellular neurosecretory cells.	Hypothalamus	Peptidergic neurons	Nitric oxide	Nitric oxide	98	2120	1426	401	575	2427
HYPEP5	Neurons	Vasopressin-producing cells, hypothalamus	Paraventricular hypothalamic nucleus magnocellular division and/or Diagonal band nucleus	Hypothalamus	Peptidergic neurons	Glutamate (VGLUT2)	Excitatory	173	2464	1754	610	803	2804
HYPEP6	Neurons	Orexin-producing neurons, hypothalamus	Dorsomedial nucleus of the hypothalamus	Hypothalamus	Cholinergic and monoaminergic neurons	Nitric oxide	Nitric oxide	32	2641	2408	302	625	3134
HYPEP7	Neurons	Pmch neurons, hypothalamus	Lateral hypothalamic area	Hypothalamus	Cholinergic and monoaminergic neurons	Glutamate (VGLUT2)	Excitatory	13	1159	1154	303	596	1615
HYPEP8	Neurons	Peptidergic neurons, hypothalamus	Anteroventral periventricular continue along midline to Medial septal nucleus	Hypothalamus	Peptidergic neurons	Glutamate (VGLUT2)	Excitatory	15	1311	970	476	782	1594
MBCHO1	Neurons	Cholinergic neurons, midbrain red nucleus	Red nucleus	Midbrain ventral	Di- and mesencephalon excitatory neurons	Acetylcholine	Acetylcholine	62	3669	3755	323	778	4381
MBDOP1	Neurons	Dopaminergic neurons, periaqueductal grey	Ventral midbrain, periaqueductal grey	Midbrain ventral	Cholinergic and monoaminergic neurons	Dopamine	Monoamines	57	1937	1211	469	751	2177
MBDOP2	Neurons	Dopaminergic neurons, ventral midbrain (SNc, VTA)	Ventral tegmental area and subtantia nigra	Midbrain ventral	Cholinergic and monoaminergic neurons	Dopamine	Monoamines	63	3309	2614	336	628	3680
MEGLU1	Neurons	Excitatory neurons, midbrain	Superior colliculus, red nucleus	Midbrain dorsal	Di- and mesencephalon excitatory neurons	Glutamate (VGLUT1)	Excitatory	263	5567	5057	492	1103	6048
MEGLU10	Neurons	Excitatory neurons, midbrain	Inferior colliculus	Midbrain dorsal	Di- and mesencephalon excitatory neurons	Glutamate (VGLUT1), Nitric oxide	Excitatory	419	5213	4147	659	895	5656
MEGLU11	Neurons	Excitatory neurons, midbrain	Inferior colliculus	Midbrain dorsal	Di- and mesencephalon excitatory neurons	Glutamate (VGLUT1)	Excitatory	249	5164	4410	557	848	5621
MEGLU14	Neurons	Glutamatergic projection neurons of the raphe nucleus	Dorsal raphe nucleus	Midbrain dorsal	Cholinergic and monoaminergic neurons	Glutamate (VGLUT3)	Excitatory	47	3131	2723	289	567	3558
MEGLU2	Neurons	Excitatory neurons, midbrain	Periaqueductal grey	Midbrain dorsal	Di- and mesencephalon excitatory neurons	Glutamate (VGLUT1)	Excitatory	336	5322	4521	606	904	5719
MEGLU3	Neurons	Excitatory neurons, midbrain	Periaqueductal grey	Midbrain dorsal	Di- and mesencephalon excitatory neurons	Glutamate (VGLUT1)	Excitatory	137	3907	2637	297	486	4153
MEGLU4	Neurons	Excitatory neurons, midbrain	Superior colliculus, sensory related	Midbrain dorsal	Di- and mesencephalon excitatory neurons	Glutamate (VGLUT1), Nitric oxide	Excitatory	136	3746	2420	578	890	4026
MEGLU5	Neurons	Excitatory neurons, midbrain	Superior colliculus, sensory related	Midbrain dorsal	Di- and mesencephalon excitatory neurons	Glutamate (VGLUT1)	Excitatory	281	4872	3931	684	1006	5212
MEGLU6	Neurons	Excitatory neurons, midbrain	Superior colliculus, sensory related, deep layer	Midbrain dorsal	Di- and mesencephalon excitatory neurons	Glutamate (VGLUT1)	Excitatory	143	5233	5034	440	801	5802
MEGLU7	Neurons	Excitatory neurons, midbrain	Inferior colliculus	Midbrain dorsal	Di- and mesencephalon excitatory neurons	Glutamate (VGLUT1)	Excitatory	138	3740	2324	538	993	3937
MEGLU8	Neurons	Excitatory neurons, midbrain	Inferior colliculus	Midbrain dorsal	Di- and mesencephalon excitatory neurons	Glutamate (VGLUT1), Nitric oxide	Excitatory	305	4098	2834	687	969	4527
MEGLU9	Neurons	Excitatory neurons, midbrain	Mantle of inferior colliculus	Midbrain dorsal	Di- and mesencephalon excitatory neurons	Glutamate (VGLUT1), Nitric oxide	Excitatory	243	4355	3333	614	915	4749
MEINH1	Neurons	Inhibitory neurons, midbrain	VTA, Substantia nigra, central nucleus raphe	Midbrain ventral	Hindbrain neurons	GABA, Nitric oxide	Inhibitory	43	1055	505	765	1007	1380
MEINH10	Neurons	Inhibitory neurons, midbrain	Superior colliculus superficial grey layer	Midbrain dorsal	Di- and mesencephalon inhibitory neurons	GABA, Nitric oxide	Inhibitory	792	5827	4901	981	1229	6253
MEINH11	Neurons	Inhibitory neurons, midbrain	Superior colliculus superficial gray layer	Midbrain dorsal	Di- and mesencephalon inhibitory neurons	GABA, Nitric oxide	Inhibitory	101	2396	967	485	549	2595
MEINH12	Neurons	Inhibitory neurons, midbrain	Superior colliculus	Midbrain dorsal	Di- and mesencephalon inhibitory neurons	GABA	Inhibitory	49	2599	1296	324	529	2788
MEINH13	Neurons	Inhibitory neurons, midbrain	Ventral/caudal midbrain (SN, VTA, reticular nucleus)	Midbrain ventral	Di- and mesencephalon inhibitory neurons	GABA	Inhibitory	70	3855	3143	272	678	4220
MEINH14	Neurons	Inhibitory neurons, midbrain	Midbrain reticular nucleus, Darkschewitz nucleus,	Midbrain ventral	Peptidergic neurons	GABA	Inhibitory	21	1413	686	368	488	1584
MEINH2	Neurons	Inhibitory neurons, midbrain	Midbrain	Midbrain dorsal,Midbrain ventral	Di- and mesencephalon inhibitory neurons	GABA	Inhibitory	461	6012	5417	595	1057	6383
MEINH3	Neurons	Inhibitory neurons, midbrain	Dorsal midbrain, medial geniculate nucleus, anteroventral midbrain	Midbrain dorsal	Di- and mesencephalon inhibitory neurons	GABA	Inhibitory	258	5368	4888	469	932	5822
MEINH4	Neurons	Inhibitory neurons, midbrain	Anterior pretectal nucleus	Midbrain dorsal	Di- and mesencephalon inhibitory neurons	GABA, Nitric oxide	Inhibitory	162	4286	3281	384	572	4651
MEINH5	Neurons	Inhibitory neurons, midbrain	Superior colliculus (sparse)	Midbrain dorsal	Di- and mesencephalon inhibitory neurons	GABA	Inhibitory	154	3487	2082	558	895	3748
MEINH6	Neurons	Inhibitory neurons, midbrain	Superior colliculus	Midbrain dorsal	Di- and mesencephalon inhibitory neurons	GABA	Inhibitory	47	3109	2084	351	732	3403
MEINH7	Neurons	Inhibitory neurons, midbrain	Superior colliculus	Midbrain dorsal	Di- and mesencephalon inhibitory neurons	GABA	Inhibitory	69	2772	1695	380	797	2975
MEINH8	Neurons	Inhibitory neurons, midbrain	Superior colliculus superficial grey layer; Erdinger-Westphal nucleus, periaqueductal grey, nucleus of the optic tract	Midbrain dorsal	Di- and mesencephalon inhibitory neurons	GABA	Inhibitory	71	2056	1160	430	829	2319
MEINH9	Neurons	Inhibitory neurons, midbrain	Dorsal midbrain scattered	Midbrain dorsal	Di- and mesencephalon inhibitory neurons	GABA	Inhibitory	400	4019	2517	892	1173	4408
MFOL1	Oligos	Myelin forming oligodendrocytes (MFOL)	Pons/medulla (possible batch effect)	CNS	Oligodendrocytes	NA	Non-neuron	3684	3275	3210	2737	3203	4398
MFOL2	Oligos	Myelin forming oligodendrocytes (MFOL)	CNS	CNS	Oligodendrocytes	NA	Non-neuron	2415	3120	2996	2357	2523	4020
MGL1	Immune	Microglia	CNS	CNS	Immune/Microglia	NA	Non-neuron	2270	1689	1264	2721	2595	3163
MGL2	Immune	Microglia, activated	CNS	CNS	Immune/Microglia	NA	Non-neuron	1820	1872	1431	2681	2585	3139
MGL3	Immune	Microglia, activated	CNS	CNS	Immune/Microglia	NA	Non-neuron	1335	1981	1604	2605	2565	3139
MOL1	Oligos	Mature oligodendrocytes	CNS	CNS	Oligodendrocytes	NA	Non-neuron	8715	2402	2326	1904	2485	3538
MOL2	Oligos	Mature oligodendrocytes, hindbrain	Pons/medulla (possible batch effect)	CNS	Oligodendrocytes	NA	Non-neuron	10011	2807	2915	1952	2776	3928
MOL3	Oligos	Mature oligodendrocytes, spinal cord enriched (high Klk6)	Spinal cord-enriched	CNS	Oligodendrocytes	NA	Non-neuron	1849	3065	3176	2402	2270	4012
MSN1	Neurons	D1 medium spiny neurons, striatum	Striatum dorsal	Striatum dorsal	Telencephalon projecting inhibitory neurons	GABA	Inhibitory	869	4943	4162	1680	1967	5420
MSN2	Neurons	D2 medium spiny neurons, striatum	Striatum dorsal	Striatum dorsal	Telencephalon projecting inhibitory neurons	GABA	Inhibitory	1094	4359	3143	1777	1861	4842
MSN3	Neurons	D2 medium spiny neurons, striatum	Striatum ventral	Striatum ventral	Telencephalon projecting inhibitory neurons	GABA	Inhibitory	1247	3960	2443	1573	1737	4576
MSN4	Neurons	D1 medium spiny neurons, striatum	Striatum ventral	Striatum ventral	Telencephalon projecting inhibitory neurons	GABA	Inhibitory	1584	4522	3044	1559	1788	5133
MSN5	Neurons	Patch D1/D2 neurons, striatum	Striatum ventral	Striatum ventral	Telencephalon projecting inhibitory neurons	GABA	Inhibitory	372	2962	1666	1077	1321	3327
MSN6	Neurons	Matrix D1 neurons, striatum	Striatum ventral	Striatum ventral	Telencephalon projecting inhibitory neurons	GABA	Inhibitory	525	1392	669	1238	1203	2001
NFOL1	Oligos	Newly formed oligodendrocytes (NFOL)	CNS	CNS	Oligodendrocytes	NA	Non-neuron	1612	3406	2969	2264	2331	4131
NFOL2	Oligos	Newly formed oligodendrocytes (NFOL), pons/medulla specific	Pons/medulla (possible batch effect)	CNS	Oligodendrocytes	NA	Non-neuron	181	2631	2177	1518	1984	2999
OBDOP1	Neurons	Dopaminergic periglomerular interneuron, olfactory bulb	Olfactory bulb, periglomerular layer	Olfactory bulb	Olfactory inhibitory neurons	GABA,Dopamine	Inhibitory	371	2190	1160	954	1005	2597
OBDOP2	Neurons	Dopaminergic neurons, olfactory nulb	Olfactory bulb	Olfactory bulb	Olfactory inhibitory neurons	GABA,Dopamine	Inhibitory	281	1517	775	1246	1340	2079
OBINH1	Neurons	Inhibitory neurons, olfactory bulb	Main and accessory olfactory bulb granular layer	Olfactory bulb	Olfactory inhibitory neurons	GABA	Inhibitory	353	1846	814	1132	1095	2311
OBINH2	Neurons	Inner horizontal cell, olfactory bulb	Olfactory bulb, mitral cell layer	Olfactory bulb	Olfactory inhibitory neurons	GABA	Inhibitory	1800	2329	1341	2024	1943	3190
OBINH3	Neurons	Inhibitory neurons, olfactory bulb	Accessory olfactory bulb granular layer	Olfactory bulb	Olfactory inhibitory neurons	GABA	Inhibitory	786	1629	855	1657	1539	2388
OBINH4	Neurons	Inhibitory neurons, olfactory bulb	Olfactory bulb, inner granular layer	Olfactory bulb	Olfactory inhibitory neurons	GABA	Inhibitory	465	1326	609	1475	1386	2051
OBINH5	Neurons	External plexiform layer interneuron, olfactory bulb	Olfactory bulb, outer plexiform layer	Olfactory bulb	Olfactory inhibitory neurons	GABA	Inhibitory	56	1770	954	544	822	1960
OBNBL1	Neurons	Neuroblasts, olfactory	Main olfactory bulb mitral layer, Main olfactory bulb outer plexiform layer	Olfactory bulb	Neuroblasts	Glutamate (VGLUT1)	Excitatory	139	3166	2259	588	942	3554
OBNBL2	Neurons	Neuroblasts, olfactory bulb	Main olfactory bulb mitral layer, Main olfactory bulb outer plexiform layer	Olfactory bulb	Neuroblasts	Glutamate (VGLUT2)	Excitatory	225	2673	1374	811	922	2955
OBNBL3	Neurons	Neuroblasts, olfactory bulb	Olfactory bulb	Olfactory bulb	Neuroblasts	GABA	Inhibitory	2240	1720	904	2289	2167	2995
OBNBL4	Neurons	Inhibitory neurons, olfactory bulb	Main olfactory bulb, glomerular layer	Olfactory bulb	Olfactory inhibitory neurons	GABA	Inhibitory	208	838	402	1141	1000	1455
OBNBL5	Neurons	Inhibitory neurons, olfactory bulb	Main olfactory bulb, glomerular layer and Accessory olfactory bulb, granular layer	Olfactory bulb	Olfactory inhibitory neurons	GABA	Inhibitory	871	1283	583	1594	1318	2116
OEC	Astrocytes	Olfactory ensheathing cells	Olfactory bulb	Olfactory bulb	Other glia	NA	Non-neuron	2031	1984	1497	2556	2716	3456
OPC	Oligos	Oligodendrocytes precursor cells	CNS	CNS	Oligodendrocytes	NA	Non-neuron	820	3596	2127	1719	2616	4235
PER1	Vascular	Pericytes	CNS	CNS	Vascular	NA	Non-neuron	4725	4429	3830	2320	3247	5255
PER2	Vascular	Pericytes, possibly mixed with VENC	CNS	CNS	Vascular	NA	Non-neuron	488	4296	4012	1907	2651	4885
PER3	Vascular	Pericytes	CNS	CNS	Vascular	NA	Non-neuron	298	1541	1002	1615	1994	2327
PSNF1	Neurons	Neurofilament (NF1), DRG	Dorsal root ganglion	Dorsal root ganglion	Peripheral sensory neurons	Glutamate (VGLUT1,VGLUT2)	Excitatory	38	3625	3901	387	1073	4379
PSNF2	Neurons	Neurofilament (NF4/5), DRG	Dorsal root ganglion	Dorsal root ganglion	Peripheral sensory neurons	Glutamate (VGLUT1,VGLUT2)	Excitatory	57	3482	3792	458	1101	4346
PSNF3	Neurons	Neurofilament (NF2/3), DRG	Dorsal root ganglion	Dorsal root ganglion	Peripheral sensory neurons	Glutamate (VGLUT1,VGLUT2)	Excitatory	31	3337	3771	351	1060	4282
PSNP1	Neurons	Non-peptidergic (TH), DRG	Dorsal root ganglion	Dorsal root ganglion	Peripheral sensory neurons	Glutamate (VGLUT2,VGLUT3)	Excitatory	282	5174	6045	1023	1598	6286
PSNP2	Neurons	Non-peptidergic (NP1.1), DRG	Dorsal root ganglion	Dorsal root ganglion	Peripheral sensory neurons	Glutamate (VGLUT2)	Excitatory	72	3770	4583	592	1234	4960
PSNP3	Neurons	Non-peptidergic (NP1.2), DRG	Dorsal root ganglion	Dorsal root ganglion	Peripheral sensory neurons	Glutamate (VGLUT2)	Excitatory	270	4957	6290	1043	1759	6504
PSNP4	Neurons	Non-peptidergic (NP2.1), DRG	Dorsal root ganglion	Dorsal root ganglion	Peripheral sensory neurons	Glutamate (VGLUT2)	Excitatory	45	3228	4191	457	982	4570
PSNP5	Neurons	Non-peptidergic (NP2.2), DRG	Dorsal root ganglion	Dorsal root ganglion	Peripheral sensory neurons	Glutamate (VGLUT2)	Excitatory	88	4137	5094	618	1419	5368
PSNP6	Neurons	Non-peptidergic (NP3), DRG	Dorsal root ganglion	Dorsal root ganglion	Peripheral sensory neurons	Glutamate (VGLUT2)	Excitatory	132	5132	6544	767	1734	6716
PSPEP1	Neurons	Peptidergicv (PEP2), DRG	Dorsal root ganglion	Dorsal root ganglion	Peripheral sensory neurons	Glutamate (VGLUT2), Nitric oxide	Excitatory	78	3844	4026	485	1020	4674
PSPEP2	Neurons	Peptidergic (PEP1.3), DRG	Dorsal root ganglion	Dorsal root ganglion	Peripheral sensory neurons	Glutamate (VGLUT2),Acetylcholine, Nitric oxide	Excitatory	102	4617	5189	556	1347	5566
PSPEP3	Neurons	Peptidergic (PEP1..4), DRG	Dorsal root ganglion	Dorsal root ganglion	Peripheral sensory neurons	Glutamate (VGLUT2)	Excitatory	92	4358	4438	585	1213	5035
PSPEP4	Neurons	Peptidergic (PEP1.1), DRG	Dorsal root ganglion	Dorsal root ganglion	Peripheral sensory neurons	Glutamate (VGLUT2)	Excitatory	117	4233	3932	650	1233	4704
PSPEP5	Neurons	Peptidergic (PEP1.2), DRG	Dorsal root ganglion	Dorsal root ganglion	Peripheral sensory neurons	Glutamate (VGLUT2)	Excitatory	30	2788	2209	400	845	3135
PSPEP6	Neurons	Peptidergic (TrpM8), DRG	Dorsal root ganglion	Dorsal root ganglion	Peripheral sensory neurons	Glutamate (VGLUT2)	Excitatory	54	2954	2465	422	838	3294
PSPEP7	Neurons	Peptidergic (TrpM8), DRG	Dorsal root ganglion	Dorsal root ganglion	Peripheral sensory neurons	Glutamate (VGLUT2)	Excitatory	64	3043	2381	472	993	3400
PSPEP8	Neurons	Peptidergic (TrpM8), DRG	Dorsal root ganglion	Dorsal root ganglion	Peripheral sensory neurons	Glutamate (VGLUT2)	Excitatory	28	3161	2993	304	772	3776
PVM1	Immune	Perivascular macrophages	CNS	CNS	Immune/Microglia	NA	Non-neuron	1390	1855	1373	2726	2765	3312
PVM2	Immune	Perivascular macrophages, activated	CNS	CNS	Immune/Microglia	NA	Non-neuron	639	1798	1342	2271	2491	2867
RGDG	Astrocytes	Dentate gyrus radial glia-like cells	Dentate gyrus subgranular zone	Dentate gyrus	Other CNS glia	NA	Non-neuron	327	1328	778	1603	1837	2220
RGSZ	Astrocytes	Subventricular zone radial glia-like cells	Striatum, rostral migragtory stream, olfactory bulb	Striatum dorsal,Striatum ventral	Other CNS glia	NA	Non-neuron	756	1346	899	1999	2264	2679
SATG1	PeripheralGlia	Satellite glia, proliferating	Dorsal root ganglion	Dorsal root ganglion	Other glia	NA	Non-neuron	30	2076	1633	696	1440	2334
SATG2	PeripheralGlia	Satellite glia	Dorsal root ganglion,Sympathetic ganglion	Dorsal root ganglion,Sympathetic ganglion	Other glia	NA	Non-neuron	654	3015	2554	2209	2470	3742
SCGLU1	Neurons	Excitatory neurons, spinal cord	Dorsal horn lamina 4-6	Spinal cord	Spinal cord excitatory neurons	Glutamate (VGLUT2)	Excitatory	52	1695	912	381	541	1979
SCGLU10	Neurons	Excitatory neurons, spinal cord	Dorsal horn lamina 2-4	Spinal cord	Spinal cord excitatory neurons	Glutamate (VGLUT2)	Excitatory	68	1652	863	523	669	1880
SCGLU2	Neurons	Excitatory neurons, spinal cord	Dorsal horn lamina 4-6	Spinal cord	Spinal cord excitatory neurons	Glutamate (VGLUT2)	Excitatory	133	2624	1449	335	412	2833
SCGLU3	Neurons	Excitatory neurons, spinal cord	Dorsal horn lamina 1-3	Spinal cord	Spinal cord excitatory neurons	Glutamate (VGLUT2)	Excitatory	62	2512	1651	386	687	2800
SCGLU4	Neurons	Excitatory neurons, spinal cord	Dorsal horn lamina 2-3	Spinal cord	Spinal cord excitatory neurons	Glutamate (VGLUT2), Nitric oxide	Excitatory	180	3004	1943	680	873	3272
SCGLU5	Neurons	Excitatory neurons, spinal cord	Dorsal horn, lamina 2-3	Spinal cord	Spinal cord excitatory neurons	Glutamate (VGLUT2)	Excitatory	252	2793	1746	867	1002	3150
SCGLU6	Neurons	Excitatory neurons, spinal cord	Dorsal horn lamina 1-2	Spinal cord	Spinal cord excitatory neurons	Glutamate (VGLUT2)	Excitatory	140	1857	1048	792	1045	2197
SCGLU7	Neurons	Excitatory neurons, spinal cord	Dorsal horn lamina 2-5	Spinal cord	Spinal cord excitatory neurons	Glutamate (VGLUT2)	Excitatory	30	1100	607	536	741	1329
SCGLU8	Neurons	Excitatory neurons, spinal cord	Dorsal horn lamina 2-5	Spinal cord	Spinal cord excitatory neurons	Glutamate (VGLUT2)	Excitatory	15	1385	938	347	582	1605
SCGLU9	Neurons	Excitatory neurons, spinal cord	Dorsal horn lamina 3	Spinal cord	Spinal cord excitatory neurons	Glutamate (VGLUT2)	Excitatory	154	1721	888	804	859	2036
SCHW	PeripheralGlia	Schwann cells	Dorsal root ganglion	Dorsal root ganglion	Other glia	NA	Non-neuron	47	1713	1166	868	1206	1997
SCINH1	Neurons	Inhibitory neurons, spinal cord	Dorsal horn, lamina 2-3,6	Spinal cord	Hindbrain neurons	GABA, Glycine (GLYT2)	Inhibitory	18	2101	1422	280	514	2343
SCINH10	Neurons	Inhibitory neurons, spinal cord	Dorsal horn, lamina 2-6	Spinal cord	Spinal cord inhibitory neurons	GABA, Glycine (GLYT2), Nitric oxide	Inhibitory	65	2198	1145	352	488	2377
SCINH11	Neurons	Central canal neurons, spinal cord	Spinal Cord central canal	Spinal cord	Peptidergic neurons	GABA	Inhibitory	50	1863	1162	488	754	2078
SCINH2	Neurons	Inhibitory neurons, spinal cord	Dorsal horn, lamina 2-6	Spinal cord	Spinal cord inhibitory neurons	GABA, Glycine (GLYT2)	Inhibitory	117	2943	1657	343	464	3184
SCINH3	Neurons	Inhibitory neurons, spinal cord	Dorsal horn, lamina 2-6	Spinal cord	Spinal cord inhibitory neurons	GABA, Glycine (GLYT2)	Inhibitory	66	2508	1631	355	573	2803
SCINH4	Neurons	Inhibitory neurons, spinal cord	Dorsal horn, lamina 3-6	Spinal cord	Spinal cord inhibitory neurons	GABA	Inhibitory	37	1917	1056	352	533	2060
SCINH5	Neurons	Inhibitory neurons, spinal cord	Dorsal horn, lamina 2-6	Spinal cord	Spinal cord inhibitory neurons	GABA, Glycine (GLYT2)	Inhibitory	44	3067	2189	341	556	3406
SCINH6	Neurons	Inhibitory neurons, spinal cord	Dorsal horn, lamina 2-4	Spinal cord	Spinal cord inhibitory neurons	GABA	Inhibitory	87	3287	2575	500	766	3665
SCINH7	Neurons	Inhibitory neurons, spinal cord	Dorsal horn, lamina 2-6	Spinal cord	Spinal cord inhibitory neurons	GABA	Inhibitory	71	1849	1091	520	729	2129
SCINH8	Neurons	Inhibitory neurons, spinal cord	Dorsal horn, lamina 2-6	Spinal cord	Spinal cord inhibitory neurons	GABA	Inhibitory	87	2270	1275	591	834	2499
SCINH9	Neurons	Inhibitory neurons, spinal cord	Dorsal horn, lamina 2-6	Spinal cord	Spinal cord inhibitory neurons	GABA	Inhibitory	84	1781	897	614	743	2006
SEPNBL	Neurons	Neuroblasts, septum	Triangular nucleus of septum	Pallidum	Neuroblasts	Glutamate (VGLUT1)	Excitatory	117	1845	742	503	464	2062
SYCHO1	Neurons	Cholinergic neurons, sympathetic	Sympathetic ganglion	Sympathetic ganglion	Sympathetic neurons	Acetylcholine, Noradrenaline	Monoamines	15	2541	3333	279	687	3905
SYCHO2	Neurons	Cholinergic neurons, sympathetic	Sympathetic ganglion	Sympathetic ganglion	Sympathetic neurons	Acetylcholine, Noradrenaline	Monoamines	75	3712	4733	441	941	5123
SYNOR1	Neurons	Noradrenergic erector muscle neurons	Sympathetic ganglion	Sympathetic ganglion	Sympathetic neurons	Noradrenaline	Monoamines	97	3790	4667	561	1029	5015
SYNOR2	Neurons	Noradrenergic neurons, sympathetic	Sympathetic ganglion	Sympathetic ganglion	Sympathetic neurons	Noradrenaline	Monoamines	62	3550	4445	493	1021	4855
SYNOR3	Neurons	Noradrenergic neurons, sympathetic	Sympathetic ganglion	Sympathetic ganglion	Sympathetic neurons	Noradrenaline	Monoamines	409	4861	6244	1117	1578	6509
SYNOR4	Neurons	Noradrenergic erector muscle neurons	Sympathetic ganglion	Sympathetic ganglion	Sympathetic neurons	Noradrenaline	Monoamines	182	4211	5718	750	1289	5933
SYNOR5	Neurons	Noradrenergic erector muscle neurons	Sympathetic ganglion	Sympathetic ganglion	Sympathetic neurons	Noradrenaline	Monoamines	46	2791	2702	504	922	3356
SZNBL	Neurons	Neuronal intermidate progenitor cells	Sub ventricular zone, Dentate gyrus	Striatum dorsal, Striatum ventral, Dentate gyrus	Neuroblasts	NA	Missing neurotransmitter	971	2814	2146	2069	2614	3688
TECHO	Neurons	Cholinergic interneurons, telencephalon	Striatum,Amygdala	Striatum dorsal, Striatum ventral,Amygdala	Cholinergic and monoaminergic neurons	Acetylcholine, Glutamate (VGLUT3), Nitric oxide	Excitatory	121	4024	3545	357	496	4673
TEGLU1	Neurons	Excitatory neurons, cerebral cortex	Cingulate/Retrosplenial area, layer 6	Cortex	Telencephalon projecting excitatory neurons	Glutamate (VGLUT1, VGLUT3)	Excitatory	402	4086	2599	904	999	4461
TEGLU10	Neurons	Excitatory neurons, cerebral cortex	Cortical pyramidal layer 5	Cortex	Telencephalon projecting excitatory neurons	Glutamate (VGLUT1)	Excitatory	866	6698	7178	1141	1689	7590
TEGLU11	Neurons	Excitatory neurons, cerebral cortex	Cortical pyramidal (poor markers)	Cortex	Telencephalon projecting excitatory neurons	Glutamate (VGLUT1)	Excitatory	1464	6681	6917	1378	1736	7474
TEGLU12	Neurons	Excitatory neurons, cerebral cortex	Lateral cortex layer 6: gustatory, barrel field, auditory	Cortex	Telencephalon projecting excitatory neurons	Glutamate (VGLUT1,VGLUT2)	Excitatory	386	4539	3897	960	1313	5084
TEGLU13	Neurons	Excitatory neurons, cerebral cortex	Subiculum	Cortex	Telencephalon projecting excitatory neurons	Glutamate (VGLUT1,VGLUT2), Nitric oxide	Excitatory	127	5175	4626	527	1106	5649
TEGLU14	Neurons	Excitatory neurons, cerebral cortex	Subiculum	Cortex	Telencephalon projecting excitatory neurons	Glutamate (VGLUT1)	Excitatory	35	3753	3875	282	784	4504
TEGLU15	Neurons	Excitatory neurons, cerebral cortex	Piriform pyramidal	Cortex	Telencephalon projecting excitatory neurons	Glutamate (VGLUT1,VGLUT2)	Excitatory	186	5554	5805	635	1335	6343
TEGLU16	Neurons	Excitatory neurons, cerebral cortex	Piriform pyramidal	Cortex	Telencephalon projecting excitatory neurons	Glutamate (VGLUT1), Nitric oxide	Excitatory	61	3986	3893	442	1048	4728
TEGLU17	Neurons	Excitatory neurons, cerebral cortex	Piriform pyramidal	Cortex	Telencephalon projecting excitatory neurons	Glutamate (VGLUT1)	Excitatory	784	6493	6382	1165	1682	7219
TEGLU18	Neurons	Excitatory neurons, cerebral cortex	Anterior olfactory nucleus, deep layer	Cortex	Telencephalon projecting excitatory neurons	Glutamate (VGLUT1)	Excitatory	657	6392	6127	1030	1414	7023
TEGLU19	Neurons	Excitatory neurons, cerebral cortex	Anterior olfactory nucleus and ventral striatum	Cortex	Telencephalon projecting excitatory neurons	Glutamate (VGLUT1)	Excitatory	89	4349	3392	404	806	4753
TEGLU2	Neurons	Excitatory neurons, cerebral cortex	Cortex pyramidal layer 6b	Cortex	Telencephalon projecting excitatory neurons	Glutamate (VGLUT1)	Excitatory	274	5412	5026	752	1137	5947
TEGLU20	Neurons	Excitatory neurons, cerebral cortex	Cortex pyramidal layer 6	Cortex	Telencephalon projecting excitatory neurons	Glutamate (VGLUT1)	Excitatory	55	3992	4005	321	899	4681
TEGLU21	Neurons	Excitatory neurons, hippocampus CA1	CA1 (posterior),subiculum,entorhinal	Hippocampus	Telencephalon projecting excitatory neurons	Glutamate (VGLUT1), Nitric oxide	Excitatory	104	4840	4620	418	866	5431
TEGLU22	Neurons	Excitatory neurons, amygdala	Basolateral amygdala	Amygdala	Telencephalon projecting excitatory neurons	Glutamate (VGLUT1)	Excitatory	958	5403	4949	1329	1818	6037
TEGLU23	Neurons	Excitatory neurons, hippocampus CA3	CA3	Hippocampus	Telencephalon projecting excitatory neurons	Glutamate (VGLUT1), Nitric oxide	Excitatory	484	6226	6794	1000	1639	7218
TEGLU24	Neurons	Excitatory neurons, hippocampus CA1	CA1	Hippocampus	Telencephalon projecting excitatory neurons	Glutamate (VGLUT1), Nitric oxide	Excitatory	2037	6113	6037	1580	1923	6874
TEGLU3	Neurons	Excitatory neurons, cerebral cortex	Cortex pyramidal layer 6	Cortex	Telencephalon projecting excitatory neurons	Glutamate (VGLUT1)	Excitatory	2734	5981	5308	1342	1492	6621
TEGLU4	Neurons	Excitatory neurons, cerebral cortex	Cortex pyramidal layer 5, Cingulate/Retrosplenial area (superficial and deep)	Cortex	Telencephalon projecting excitatory neurons	Glutamate (VGLUT1)	Excitatory	664	6137	6266	1169	2036	6872
TEGLU5	Neurons	Excitatory neurons, cerebral cortex	Entorhinal superficial layers	Cortex	Telencephalon projecting excitatory neurons	Glutamate (VGLUT1,VGLUT2)	Excitatory	126	4692	4280	609	1083	5216
TEGLU6	Neurons	Excitatory neurons, cerebral cortex	Cingulate/Retrosplenial area, layer 2	Cortex	Telencephalon projecting excitatory neurons	Glutamate (VGLUT1,VGLUT2)	Excitatory	598	4060	2537	1209	1327	4475
TEGLU7	Neurons	Excitatory neurons, cerebral cortex	Cortical pyramidal layer 2/3	Cortex	Telencephalon projecting excitatory neurons	Glutamate (VGLUT1)	Excitatory	2435	7160	7625	1588	2101	8147
TEGLU8	Neurons	Excitatory neurons, cerebral cortex	Cortical pyramidal layer 4	Cortex	Telencephalon projecting excitatory neurons	Glutamate (VGLUT1)	Excitatory	3071	6858	7185	1534	2100	7817
TEGLU9	Neurons	Excitatory neurons, cerebral cortex	Cingulate/Retrosplenial area, layer 5	Cortex	Telencephalon projecting excitatory neurons	Glutamate (VGLUT1)	Excitatory	202	4803	3948	630	910	5167
TEINH1	Neurons	Inhibitory neurons, pallidum	Medial septal nucleus and Magnocellular nucleus	Pallidum	Di- and mesencephalon inhibitory neurons	GABA	Inhibitory	576	5652	4696	569	712	6001
TEINH10	Neurons	R-LM border Cck interneurons, cortex/hippocampus	Hippocampus (sr/slm),Cortex	Hippocampus,Cortex	Telencephalon inhibitory interneurons	GABA, Glutamate (VGLUT3)	Ex/In	581	4577	4544	933	1064	5171
TEINH11	Neurons	R-LM border Cck interneurons, cortex/hippocampus	Hippocampus (sr/slm),Cortex	Hippocampus,Cortex	Telencephalon inhibitory interneurons	GABA,Glutamate (VGLUT3), Nitric oxide	Ex/In	660	6322	7015	935	1294	7343
TEINH12	Neurons	Non-border Cck interneurons, cortex/hippocampus	Hippocampus,Cortex	Hippocampus,Cortex	Telencephalon inhibitory interneurons	GABA,Glutamate (VGLUT3)	Ex/In	280	5648	6161	644	915	6545
TEINH13	Neurons	Trilaminar cells, hippocampus	Hippocampus	Hippocampus	Telencephalon inhibitory interneurons	GABA, Glutamate (VGLUT3)	Ex/In	163	4961	5187	471	788	5722
TEINH14	Neurons	CGE-derived neurogliaform cells Cxcl14+, cortex/hippocampus	Hippocampus,Cortex	Hippocampus,Cortex	Telencephalon inhibitory interneurons	GABA	Inhibitory	422	3776	2530	893	1032	4188
TEINH15	Neurons	CGE-derived neurogliaform cells, cortex/hippocampus	Hippocampus,Cortex	Hippocampus,Cortex	Telencephalon inhibitory interneurons	GABA, Nitric oxide	Inhibitory	1069	4823	3698	1294	1527	5363
TEINH16	Neurons	Ivy and MGE-derived neurogliaform cells, cortex/hippocampus	Hippocampus,Cortex	Hippocampus,Cortex	Telencephalon inhibitory interneurons	GABA, Nitric oxide	Inhibitory	644	5208	4714	1017	1167	5709
TEINH17	Neurons	Axo-axonic, cortex/hippocampus	Hippocampus,Cortex	Hippocampus,Cortex	Telencephalon inhibitory interneurons	GABA	Inhibitory	675	4491	3567	947	1082	4941
TEINH18	Neurons	Basket and bistratified cells, cortex/hippocampus	Hippocampus,Cortex	Hippocampus,Cortex	Telencephalon inhibitory interneurons	GABA, Nitric oxide	Inhibitory	547	5253	5123	946	1191	5898
TEINH19	Neurons	Hippocamposeptal projection, cortex/hippocampus	Hippocampus (so),Cortex	Hippocampus,Cortex	Telencephalon inhibitory interneurons	GABA	Inhibitory	1040	6279	6585	971	1095	7000
TEINH2	Neurons	Inhibitory neurons, septal nucleus	Septal nucleus	Striatum dorsal, Striatum ventral	Peptidergic neurons	GABA	Inhibitory	1339	4831	3545	1295	1549	5544
TEINH20	Neurons	Inhibitory interneurons, hippocampus	Hippocampus (sr/slm)	Hippocampus	Telencephalon inhibitory interneurons	GABA	Inhibitory	139	4634	4729	420	690	5292
TEINH21	Neurons	Sleep-active, long-range projection interneurons, cortex/hippocampus	Hippocampus,Cortex	Hippocampus,Cortex	Telencephalon inhibitory interneurons	GABA, Nitric oxide	Inhibitory	385	3559	3072	777	865	4037
TEINH3	Neurons	Inhibitory neurons, telencephalon	Bed nuclei of the stria terminalis posterior division	Pallidum	Peptidergic neurons	GABA	Inhibitory	145	3479	2176	482	629	3758
TEINH4	Neurons	Interneuron-selective interneurons, cortex/hippocampus	Hippocampus,Cortex	Hippocampus,Cortex	Telencephalon inhibitory interneurons	GABA	Inhibitory	645	2983	1698	1046	915	3470
TEINH5	Neurons	Interneuron-selective interneurons, cortex/hippocampus	Hippocampus,Cortex	Hippocampus,Cortex	Telencephalon inhibitory interneurons	GABA, Nitric oxide	Inhibitory	449	3345	1911	883	907	3653
TEINH6	Neurons	Interneuron-selective interneurons, cortex/hippocampus	Hippocampus,Cortex	Hippocampus,Cortex	Telencephalon inhibitory interneurons	GABA	Inhibitory	145	2560	1508	529	661	2791
TEINH7	Neurons	Interneuron-selective interneurons, hippocampus	Hippocampus	Hippocampus	Telencephalon inhibitory interneurons	GABA	Inhibitory	68	2692	1872	431	669	2934
TEINH8	Neurons	Interneuron-selective interneurons, hippocampus	Hippocampus	Hippocampus	Telencephalon inhibitory interneurons	GABA	Inhibitory	57	2246	1260	440	673	2390
TEINH9	Neurons	Non-border Cck interneurons, hippocampus	Hippocampus	Hippocampus	Telencephalon inhibitory interneurons	GABA	Inhibitory	162	3462	3183	570	861	3903
VECA	Vascular	Vascular endothelial cells, arterial	CNS	CNS	Vascular	NA	Non-neuron	109	3263	2478	1271	2422	3622
VECC	Vascular	Vascular endothelial cells, capillary	CNS	CNS	Vascular	NA	Non-neuron	1025	3142	2557	2295	2591	3885
VECV	Vascular	Vascular endothelial cells, venous	CNS	CNS	Vascular	NA	Non-neuron	2780	3497	2928	2574	3060	4477
VLMC1	Vascular	Vascular leptomeningeal cells	CNS	CNS	Vascular	NA	Non-neuron	702	1908	1292	1916	2177	2800
VLMC2	Vascular	Vascular leptomeningeal cells	Olfactory bulb-enriched	CNS	Vascular	NA	Non-neuron	662	2623	2147	1949	2585	3417
VSMCA	Vascular	Vascular smooth muscle cells, arterial	CNS	CNS	Vascular	NA	Non-neuron	1221	1775	1316	2272	2326	2967
