# Supplementary material for: Genetic mapping of etiologic brain cell types for obesity
Source: eLife. 2020 Sep 21;9:e55851. doi: 10.7554/eLife.55851 (PMC7505664; doi:10.7554/eLife.55851)
Supplement: Figure 3—source data 2. [file elife-55851-fig3-data2.xlsx]

## Sheet: 5 - S-LDSC MNS
Annotation	P-value	Estimate	Std.error	FWER < 0.05	Annotation size	h2g proportion	h2g enrichment	h2g enrichment P-value	AD (Jansen, 2019)	ADHD (Demontis, 2017)	AN (Duncan, 2017)	ASD (Grove, 2018)	BIP (PGC, 2018)	CAD (Schunkert, 2011)	CVD (Loh, 2018)	CELIAC (Dubois, 2010)	CROHNS (Jostins, 2012)	DEP (Nagel, 2018)	BP_DIA (Loh, 2018)	EA3 (Lee, 2018)	FG_F (Lagou, 2018)	FI_F (Lagou, 2018)	HBA1C (Wheeler, 2017)	HEIGHT (Loh, 2018)	IBD (Jostins, 2012)	INS (Jansen, 2018)	INT (Savage, 2018)	HDL (Teslovich, 2010)	LDL (Teslovich, 2010)	TG (Teslovich, 2010)	SLE (Bentham, 2015)	MDD (Howard, 2019)	MS (Patsopoulos, 2011)	NEU (Nagel, 2018)	PBC (Cordell, 2015)	RA (Okada, 2014)	RT (Linner, 2019)	SCZ (Pardinas, 2018)	SWB (Okbay, 2016)	BP_SYS (Loh, 2018)	T1D (Bradfield, 2011)	T2D (Loh, 2018)	UC (Jostins, 2012)	WHR (Pulit, 2019)	WHRadjBMI (Loh, 2018)	WORRY (Nagel, 2018)
DEINH3	1.17705e-06	2.35316e-08	4.98511e-09	TRUE	0.157647	0.212113	1.34549	2.34299e-16	0.313112	0.0344771	0.397829	0.126747	1.43409e-06	0.0956983	0.0911402	0.760666	0.597128	0.0227059	0.190215	0.0115828	0.4083	0.694893	0.0405997	0.903161	0.18451	0.0460417	0.0015051	0.33028	0.515605	0.289707	0.613589	0.0693091	0.00534795	0.0126048	0.00310183	0.0420689	0.00100905	0.00214549	0.0800883	0.330865	0.133319	0.00501818	0.0212385	0.479353	0.997559	0.000438017
MEGLU11	2.59169e-06	2.45193e-08	5.3803e-09	TRUE	0.15267	0.206054	1.34967	5.69467e-15	0.169533	0.194411	0.383306	0.0168762	0.000554583	0.0974627	0.274661	0.0391155	0.0999928	0.000159118	0.468287	2.16232e-05	0.0509612	0.942814	0.0305622	0.922639	0.187335	4.73597e-05	6.22661e-07	0.216761	0.0731758	0.035105	0.0908735	2.64807e-05	0.0236801	0.000594153	0.0902288	0.0540652	0.0119204	0.0732801	0.0445488	0.359589	0.0434543	0.0493935	0.260275	0.00172347	0.426198	6.70637e-05
MEINH2	8.11498e-06	2.43583e-08	5.64989e-09	TRUE	0.170645	0.229235	1.34335	1.93121e-15	0.231765	0.0707639	0.539391	0.180574	2.42912e-06	0.500416	0.178256	0.85487	0.771644	0.104082	0.531277	0.00483007	0.314637	0.959963	0.00889209	0.915706	0.728057	0.00487466	0.000343852	0.696668	0.0378659	0.247198	0.221268	0.0134658	0.00317162	0.01737	0.00903183	0.129938	0.00169525	0.00264262	0.125682	0.821317	0.0239249	0.289018	0.600352	0.183685	0.981349	6.56563e-05
MEGLU10	8.83146e-06	2.21378e-08	5.15726e-09	TRUE	0.14743	0.194858	1.32169	8.66513e-15	0.161044	0.0232176	0.0998013	0.0220515	0.000311318	0.118299	0.396438	0.138543	0.943115	0.00755233	0.469084	6.72035e-05	0.281434	0.93798	0.0616923	0.989245	0.697228	0.00103998	4.68997e-05	0.159994	0.480588	0.049238	0.148897	0.000155184	0.115285	5.52942e-05	0.278329	0.183573	0.0541253	0.242824	0.0570355	0.464582	0.762027	0.114962	0.646995	0.183195	0.993129	2.37013e-05
DEGLU5	9.14384e-06	3.29372e-08	7.68693e-09	TRUE	0.140685	0.19586	1.39219	9.15547e-13	0.140622	0.0724943	0.34732	0.0163055	0.000139896	0.773165	0.0485598	0.035003	0.171305	0.000250274	0.531145	0.000543742	0.492678	0.743775	0.0515297	0.999707	0.145105	0.00233018	0.000212668	0.34102	0.456901	0.145968	0.142053	0.00194302	0.00269824	9.11475e-05	0.00618764	0.0149522	0.00303788	0.0119132	0.132826	0.428825	0.00814076	0.0341238	0.0395143	0.12891	0.970181	1.07988e-07
MEGLU1	1.54074e-05	2.23821e-08	5.3708e-09	TRUE	0.16126	0.214269	1.32872	3.17428e-15	0.376066	0.106029	0.392302	0.0290795	5.81353e-05	0.458316	0.0560789	0.385256	0.272351	0.014148	0.363224	0.000173355	0.663401	0.989073	0.202945	0.963118	0.274296	0.00202248	1.93247e-06	0.454033	0.137841	0.28865	0.166268	0.000243072	0.000369459	0.000730695	0.00656591	0.0882117	0.00262154	0.157832	0.0956686	0.403119	0.0223218	0.0966406	0.1102	0.269664	0.987042	2.93698e-05
MEGLU3	3.84801e-05	2.73122e-08	6.90804e-09	TRUE	0.0993702	0.137043	1.37911	3.81952e-12	0.889477	0.00791056	0.27685	0.00497027	4.06742e-05	0.15583	0.476419	0.376746	0.108951	0.00507092	0.458077	0.000376061	0.202127	0.861932	0.189364	0.749017	0.215192	0.000114568	2.06008e-06	0.290635	0.362647	0.091592	0.0735642	0.000199166	0.000302	9.65434e-06	0.24265	0.0613544	0.042804	0.0508872	0.0571231	0.627699	0.541993	0.0865704	0.150103	0.337395	0.998626	1.58476e-06
TEGLU23	4.05101e-05	1.54641e-08	3.92353e-09	TRUE	0.213504	0.275288	1.28938	2.93443e-16	0.8899	0.020457	0.701687	0.258095	1.0563e-07	0.305075	0.0600291	0.55738	0.598671	0.00356296	0.221871	6.93815e-07	0.0521865	0.829931	0.193728	0.802912	0.544039	0.0377389	7.87564e-09	0.132032	0.476389	0.192131	0.995706	0.00273084	0.404877	0.000971891	0.0214856	0.736326	0.00179998	2.32819e-05	0.644899	0.232166	0.192792	0.299543	0.520703	0.614219	0.99735	0.00036491
DEGLU4	4.18573e-05	1.82511e-08	4.63991e-09	TRUE	0.119064	0.158467	1.33094	1.78497e-13	0.186599	0.0293936	0.452515	0.0549031	0.000543457	0.53479	0.302233	0.373087	0.247725	0.000323651	0.767801	9.76269e-07	0.163351	0.8457	0.0524297	0.998066	0.313138	0.0024972	2.88506e-05	0.836673	0.837907	0.754736	0.24625	3.29534e-06	0.288129	1.78251e-06	0.103737	0.283753	0.00167276	3.79971e-05	0.0106618	0.574131	0.0346997	0.0701026	0.245761	0.269984	0.932746	4.08354e-07
TEGLU19	4.5006e-05	1.87736e-08	4.79402e-09	TRUE	0.126533	0.169972	1.3433	1.35241e-15	0.406821	0.116216	0.602743	0.0166032	3.33553e-08	0.0923774	0.0361176	0.519188	0.500621	0.0368131	0.281784	2.61201e-09	0.287511	0.939741	0.171207	0.995119	0.336807	0.0108642	3.46081e-13	0.107143	0.845676	0.45341	0.659132	0.00241364	0.318565	1.3562e-05	0.40497	0.643187	0.000253015	1.71569e-09	0.208793	0.173361	0.617645	0.409689	0.328745	0.454963	0.966965	2.87519e-06
HBSER5	5.01534e-05	1.95728e-08	5.03177e-09	TRUE	0.150552	0.193695	1.28657	3.42907e-13	0.151468	0.190069	0.859105	0.116151	6.24603e-05	0.249043	0.12249	0.83999	0.519774	0.0272693	0.425784	0.0199907	0.229184	0.276588	0.335924	0.978726	0.402235	0.0314974	0.00490105	0.198356	0.128564	0.170796	0.0255897	0.000296736	0.363964	0.0262496	0.0169354	0.126979	0.0732749	0.0993907	0.365418	0.313574	0.320399	0.110742	0.277933	0.27316	0.941415	0.00242801
HBGLU2	5.36193e-05	2.40338e-08	6.2045e-09	TRUE	0.17448	0.229723	1.31662	2.98499e-13	0.0239124	0.286547	0.355058	0.531726	1.00127e-05	0.337298	0.119051	0.105709	0.256446	0.00258646	0.36324	0.0060141	0.0825839	0.714948	0.0675353	0.988075	0.394152	0.0112139	4.69092e-05	0.370915	0.263864	0.172369	0.185577	0.00497968	0.155574	0.0414826	0.0480131	0.160518	0.0200465	0.00801604	0.275383	0.176326	0.299867	0.00898774	0.401994	0.0642155	0.927568	0.00057253
MEGLU2	7.44746e-05	2.80336e-08	7.39125e-09	TRUE	0.148475	0.202782	1.36576	3.70002e-12	0.346281	0.043074	0.33274	0.0751682	0.000648361	0.105054	0.114582	0.28797	0.200174	6.30243e-05	0.604639	0.000541708	0.425431	0.573756	0.0585069	0.670687	0.152739	0.000815354	1.65537e-05	0.0468705	0.141127	0.039474	0.0980178	6.1923e-05	0.0119894	9.65217e-06	0.0843305	0.0364606	0.000994709	0.0649684	0.0778857	0.256958	0.0468231	0.0907171	0.190651	0.0883211	0.89182	5.16817e-06
TEGLU17	8.56403e-05	1.75731e-08	4.67619e-09	TRUE	0.219563	0.280025	1.27537	2.44149e-13	0.498088	0.0317083	0.322419	0.171279	3.31248e-09	0.0870279	0.0138649	0.379627	0.461213	0.0355241	0.356439	1.71053e-10	0.0490583	0.722269	0.262811	0.983596	0.518782	4.31372e-05	1.55697e-10	0.0334266	0.117637	0.167304	0.679497	0.000136678	0.0322905	2.09753e-05	0.118104	0.108859	0.000503243	2.24915e-07	0.318494	0.487822	0.295768	0.0995162	0.640537	0.413586	0.983235	4.77116e-09
MEGLU7	9.13157e-05	1.99294e-08	5.32601e-09	TRUE	0.115158	0.158638	1.37757	6.36555e-13	0.448208	0.117514	0.272492	0.0926104	2.73139e-06	0.492607	0.530658	0.64445	0.259937	0.00915701	0.695324	4.21717e-07	0.496507	0.926103	0.502559	0.817542	0.519372	8.60512e-06	1.12449e-07	0.571638	0.178069	0.309035	0.0729464	4.20769e-06	0.227445	0.000179407	0.0152387	0.0250886	0.00736278	0.000445337	0.111961	0.789469	0.176539	0.0634076	0.585235	0.0683114	0.969132	4.49661e-05
MEINH3	0.000101488	2.21721e-08	5.96782e-09	TRUE	0.149849	0.199774	1.33316	5.55248e-13	0.126936	0.215143	0.470055	0.430243	2.11763e-05	0.302702	0.190484	0.278563	0.493541	0.0351505	0.370969	0.00542098	0.128091	0.872616	0.0311152	0.927055	0.561548	0.0025883	7.90682e-05	0.386831	0.271071	0.0731073	0.196578	0.0125316	0.000628872	0.018832	0.00144811	0.0983213	0.00316527	0.0871755	0.233571	0.489649	0.229315	0.0867461	0.445929	0.533794	0.995616	0.000645797
HBGLU5	0.000110504	2.12443e-08	5.75148e-09	TRUE	0.146456	0.202211	1.38069	9.45657e-13	0.452243	0.05907	0.883178	0.267889	0.0112161	0.289139	0.228745	0.640659	0.923962	0.0702788	0.602435	0.00114629	0.921686	0.885647	0.134038	0.990997	0.696122	0.00888991	0.00140456	0.438378	0.632745	0.245372	0.189529	0.186017	0.0373594	7.65904e-05	0.0271112	0.161596	0.00375776	3.02308e-05	0.10805	0.679335	0.00382446	0.842065	0.320218	0.454463	0.987932	9.6623e-05
TEINH12	0.000111583	1.80119e-08	4.87965e-09	TRUE	0.170779	0.224011	1.3117	3.04751e-13	0.0936671	0.117796	0.179332	0.387853	2.6977e-06	0.532741	0.415636	0.828736	0.690999	0.00138125	0.709943	0.0016992	0.313301	0.590351	0.205242	0.989734	0.788782	0.00706363	4.47792e-07	0.6503	0.427536	0.405001	0.235874	0.00530632	0.0905122	0.000573999	0.11314	0.328388	0.0398776	0.00019148	0.127081	0.77079	0.0541026	0.763075	0.483557	0.329905	0.99742	5.27916e-08
TEINH1	0.000114149	1.98583e-08	5.3883e-09	TRUE	0.151212	0.195442	1.29251	1.70499e-13	0.634054	0.304684	0.122113	0.0513988	6.38813e-06	0.0710288	0.17727	0.0792758	0.432302	0.00123713	0.578763	1.17488e-05	0.346707	0.875526	0.0590271	0.946667	0.357837	0.0194814	1.25676e-06	0.925793	0.837845	0.552858	0.318695	0.0509748	0.0041518	0.00499557	0.0664506	0.0433147	0.0662691	0.00289624	0.0870243	0.411364	0.139466	0.462217	0.169201	0.605873	0.995924	7.7266e-05
TEGLU4	0.000114284	1.98192e-08	5.37813e-09	TRUE	0.217074	0.28489	1.31241	1.74377e-14	0.140069	0.0870173	0.587862	0.279876	4.17029e-07	0.29911	0.150286	0.967153	0.374107	0.00417191	0.513963	3.71331e-09	0.116958	0.834199	0.238153	0.996453	0.0970442	0.000407133	4.09153e-12	0.0260409	0.0520847	0.0791168	0.518124	0.00124951	0.0435525	1.5207e-07	0.135249	0.875223	6.85152e-05	3.88759e-10	0.246883	0.455083	0.0368177	0.107807	0.168982	0.395597	0.993778	9.48499e-13
TEGLU21	0.000115727	2.34046e-08	6.35656e-09	TRUE	0.153965	0.206435	1.34079	3.73802e-13	0.547677	0.0152984	0.281425	0.0368383	3.74936e-07	0.546797	0.0518421	0.324726	0.273719	8.27306e-05	0.358333	2.93016e-12	0.0966997	0.506043	0.191273	0.989203	0.286135	0.00181998	3.6367e-11	0.110109	0.129062	0.274375	0.851987	6.4345e-05	0.0308704	1.18134e-08	0.124449	0.25001	9.68417e-05	5.24082e-09	0.348831	0.271623	0.0526554	0.0623032	0.485761	0.0730324	0.965674	1.09194e-10
HBINH8	0.000159137	2.31798e-08	6.43893e-09	TRUE	0.0751348	0.106303	1.41483	3.86549e-12	0.197965	0.0522133	0.364384	0.625335	0.0832954	0.254603	0.303593	0.0897568	0.794682	0.820488	0.479491	0.00760043	0.156165	0.342163	0.0245706	0.550138	0.385653	0.0610382	0.00166294	0.514649	0.0760734	0.0998795	0.722139	0.0471006	0.0855414	0.332706	0.124475	0.608619	0.0766813	0.000940079	0.613921	0.447624	0.00721544	0.0129946	0.632257	0.0168637	0.601168	0.0434664
DEINH5	0.000208413	2.52587e-08	7.15707e-09	FALSE	0.100997	0.138158	1.36795	1.20583e-10	0.830345	0.319805	0.378298	0.0174835	0.0100844	0.0512375	0.716874	0.370651	0.780486	0.0159072	0.940466	5.47765e-05	0.754985	0.839197	0.742031	0.556483	0.478768	0.0290497	9.89611e-06	0.141116	0.657252	0.151728	0.61211	0.0494586	0.225132	0.00310065	0.668725	0.415117	0.204746	0.0123028	0.455706	0.737339	0.848829	0.355655	0.452035	0.34809	0.955049	0.00169151
HBGLU3	0.000224919	2.28904e-08	6.52339e-09	FALSE	0.126656	0.168996	1.33429	1.16327e-10	0.62158	0.0894796	0.0866682	0.3009	3.01396e-06	0.69895	0.0368138	0.550759	0.318554	0.00797548	0.10895	0.00266696	0.0600022	0.48738	0.298994	0.655442	0.58509	0.00421194	0.000163471	0.505854	0.617499	0.247904	0.0833487	0.00282718	0.841415	0.0111083	0.360627	0.0748677	0.00245372	0.00431719	0.0668029	0.0407164	0.336402	0.0950244	0.939959	0.0639462	0.700141	0.015958
HBINH5	0.000233956	1.83554e-08	5.24666e-09	FALSE	0.215572	0.275119	1.27623	1.10602e-13	0.0999258	0.025233	0.479749	0.222245	0.000286478	0.144451	0.0699016	0.867677	0.152701	0.110509	0.167879	0.056112	0.0619359	0.80703	0.00287761	0.807956	0.177862	0.00514362	0.000575397	0.255963	0.501393	0.399624	0.607	0.00813935	0.00973545	0.104477	0.00260524	0.0697497	0.0218279	0.00894565	0.470445	0.161082	0.232072	0.149067	0.10579	0.10608	0.929976	0.00172823
MEINH13	0.000300814	2.20291e-08	6.42084e-09	FALSE	0.101483	0.138028	1.3601	8.21102e-11	0.133152	0.26781	0.107231	0.0560635	6.79775e-05	0.109845	0.60106	0.423576	0.951858	0.0858388	0.83035	0.0345687	0.143597	0.817747	0.375153	0.607777	0.969441	0.000224549	0.016664	0.233009	0.363023	0.164954	0.0991303	0.0417692	0.303902	0.00127616	0.444169	0.0512999	0.0403276	0.109035	0.230244	0.812963	0.223853	0.241877	0.771837	0.187181	0.953743	0.00212944
MEGLU8	0.000301591	2.29408e-08	6.68793e-09	FALSE	0.125546	0.172116	1.37094	2.36523e-10	0.587417	0.0451638	0.00982537	0.0247604	1.29043e-05	0.133868	0.724246	0.46784	0.318696	0.000261301	0.655279	2.33857e-10	0.0392647	0.408531	0.0647738	0.735236	0.459316	7.97897e-05	4.15616e-09	0.250288	0.580959	0.0650484	0.457187	3.45754e-06	0.131146	1.05752e-07	0.114177	0.182235	0.00641034	0.0301445	0.0247619	0.789868	0.210539	0.0861648	0.64946	0.0706557	0.794398	1.15445e-08
HBINH3	0.000364159	2.35364e-08	6.96612e-09	FALSE	0.0899986	0.126553	1.40617	7.09885e-10	0.102254	0.789432	0.576299	0.107734	0.00307062	0.253315	0.221249	0.221073	0.86101	0.00620898	0.202275	0.0119155	0.445582	0.0287929	0.0769339	0.898717	0.904961	0.208535	0.000593684	0.399436	0.781623	0.176778	0.132589	0.0676345	0.804439	0.0267413	0.480032	0.0629868	0.0161766	0.144476	0.133044	0.145201	0.0113658	0.100558	0.910573	0.01007	0.846938	0.0874222
HBINH9	0.00045696	2.00886e-08	6.0585e-09	FALSE	0.106759	0.14463	1.35474	1.32229e-11	0.397373	0.531574	0.507449	0.57757	0.00478592	0.575194	0.272663	0.691495	0.611844	0.119878	0.233058	0.0337841	0.0821962	0.604271	0.0151037	0.689101	0.873782	0.0593184	0.000127451	0.87607	0.21428	0.187669	0.627447	0.117796	0.456378	0.0729174	0.525934	0.712019	0.0171967	0.000272482	0.0175192	0.228554	0.0367747	0.101573	0.833661	0.0575229	0.587372	0.0222348
HBCHO2	0.000600091	2.02905e-08	6.26474e-09	FALSE	0.136422	0.177838	1.30359	1.31998e-12	0.509052	0.101455	0.687968	0.362003	0.128458	0.673919	0.130757	0.761433	0.485731	0.0732517	0.265012	0.487935	0.837435	0.741957	0.14346	0.99018	0.623383	0.33209	0.153537	0.26259	0.752932	0.421236	0.525519	0.371545	0.130395	0.378396	0.0660669	0.4668	0.131411	0.0024429	0.29131	0.237519	0.0802951	0.0474333	0.399738	0.444618	0.994421	0.161337
HBNOR	0.000629806	2.85478e-08	8.85197e-09	FALSE	0.0824805	0.118925	1.44186	6.14737e-08	0.0278577	0.175568	0.184436	0.373488	0.00410358	0.198548	0.908996	0.621747	0.592567	0.406183	0.824821	0.123741	0.0575783	0.317689	0.725893	0.977239	0.733806	0.0201403	0.0539823	0.776932	0.253774	0.0534145	0.210394	0.177962	0.738251	0.521944	0.649714	0.282098	0.0510382	0.0845382	0.728625	0.636702	0.00770057	0.260147	0.750733	0.0377057	0.751299	0.528998
HBINH4	0.000658251	1.87437e-08	5.83487e-09	FALSE	0.0971147	0.131415	1.35319	2.4077e-10	0.12846	0.383464	0.147416	0.401646	5.91133e-05	0.345035	0.0900612	0.597675	0.774305	0.0256599	0.491447	0.0293179	0.185132	0.0986668	0.348144	0.968891	0.696521	0.0350951	0.00060164	0.450291	0.14395	0.108729	0.0599281	0.0236349	0.399413	0.00737924	0.0185593	0.23612	0.0265825	0.000985958	0.120966	0.228056	0.122619	0.0954297	0.591901	0.0337435	0.806294	0.000220652
SCINH4	0.000752858	1.89239e-08	5.96295e-09	FALSE	0.0529053	0.0748314	1.41444	1.2438e-09	0.685382	0.0426606	0.204946	0.868617	0.0243228	0.27705	0.468416	0.719397	0.34107	0.893321	0.30252	0.0413145	0.130727	0.977787	0.141693	0.614529	0.092148	0.413262	0.104566	0.339637	0.86613	0.0896847	0.762638	0.0845633	0.18922	0.139415	0.711246	0.458443	0.0283093	0.116393	0.00253884	0.142351	0.608939	0.415018	0.113513	0.0171095	0.138753	0.0340953
MEINH4	0.000771679	3.10537e-08	9.80725e-09	FALSE	0.113185	0.158117	1.39699	8.92024e-09	0.321544	0.361137	0.403592	0.0113369	2.06576e-05	0.211061	0.775217	0.199013	0.57059	6.38345e-05	0.985264	0.00109531	0.429991	0.701772	0.00815493	0.967435	0.513993	5.69493e-05	4.17211e-06	0.902264	0.522919	0.574756	0.185801	0.00223056	0.00578693	3.6819e-05	0.0950756	0.153511	0.0312204	0.0438005	0.33973	0.985539	0.362324	0.0364239	0.386743	0.0318789	0.76902	8.69112e-05
TEGLU6	0.000962097	1.3923e-08	4.48883e-09	FALSE	0.142637	0.187352	1.31348	1.2108e-11	0.637345	0.0449465	0.050073	0.00597609	2.13365e-07	0.218643	0.59145	0.812388	0.837237	0.0204091	0.767629	2.93077e-06	0.250817	0.774615	0.635987	0.999304	0.433849	0.00406819	8.6364e-08	0.499472	0.584678	0.156848	0.21663	0.0160427	0.0134002	5.10535e-05	0.0810583	0.701789	0.02296	3.67429e-06	0.0612218	0.724561	0.214584	0.165185	0.422123	0.323079	0.945101	3.8594e-07
SCINH2	0.000964392	3.80914e-08	1.22836e-08	FALSE	0.071642	0.111752	1.55986	2.33389e-08	0.174081	0.101508	0.0315988	0.462268	0.0112169	0.0610671	0.022669	0.151123	0.412644	0.230382	0.116583	3.05197e-05	0.1824	0.665362	0.00461735	0.619733	0.156943	0.0385448	0.00122455	0.216167	0.045839	0.131638	0.55125	0.00490661	0.0235604	0.00280368	0.0821511	0.232547	0.0573479	0.00306385	0.116317	0.206357	0.100749	0.0162867	0.400861	0.0437342	0.733233	0.000421178
MSN1	0.0010063	1.13758e-08	3.68344e-09	FALSE	0.182399	0.237482	1.30199	2.06842e-13	0.356724	0.125442	0.0476513	0.119534	6.22321e-07	0.0654249	0.252489	0.450388	0.00860603	0.000607158	0.744925	2.89618e-11	0.0511116	0.687677	0.762462	0.999119	0.116569	0.000760259	2.27616e-11	0.0916623	0.275763	0.122166	0.310681	7.34339e-06	0.0529112	3.19416e-06	0.734542	0.376841	0.000302436	3.58474e-08	0.00216555	0.64297	0.237656	0.676342	0.355876	0.806583	0.99421	5.644e-05
MEINH7	0.00104426	1.82331e-08	5.92494e-09	FALSE	0.0787884	0.109882	1.39464	1.2497e-10	0.242739	0.176929	0.753482	0.217766	0.000616962	0.363485	0.151968	0.258319	0.890081	0.370744	0.270656	0.00399255	0.401849	0.877817	0.614122	0.961936	0.572325	0.0259705	0.0190539	0.912226	0.8774	0.844609	0.0859838	0.175562	0.197505	0.146335	0.502425	0.624308	0.0665214	0.10895	0.95852	0.251666	0.208236	0.759852	0.420437	0.323166	0.996503	0.0063209
TEINH11	0.00111245	1.472e-08	4.81292e-09	FALSE	0.201642	0.25699	1.27448	6.17668e-12	0.120523	0.0296277	0.399134	0.0753398	0.000136215	0.610861	0.503521	0.649821	0.722457	0.00059934	0.820604	0.000360611	0.0601409	0.625095	0.38645	0.909159	0.921168	0.00538804	4.11505e-05	0.686234	0.591754	0.431351	0.638993	0.00716671	0.371945	0.000534171	0.17129	0.332031	0.0212503	0.000110645	0.05836	0.569798	0.0538544	0.792802	0.622562	0.595275	0.998285	7.85522e-08
TEGLU10	0.00117611	1.3163e-08	4.32747e-09	FALSE	0.22621	0.285247	1.26098	2.42567e-13	0.120287	0.000189656	0.728042	0.412054	7.06784e-08	0.551946	0.179982	0.894126	0.568498	3.6948e-05	0.761307	2.8952e-11	0.0427973	0.89542	0.305574	0.99982	0.450473	0.0413921	2.52714e-13	0.683669	0.108437	0.769589	0.645843	0.000608867	0.187191	6.50829e-09	0.109565	0.662757	0.000230628	2.82782e-09	0.343337	0.822503	0.418365	0.569922	0.330577	0.644642	0.999825	7.71481e-11
TEINH15	0.00119004	1.33594e-08	4.39715e-09	FALSE	0.154762	0.202274	1.307	1.58511e-10	0.169707	0.379102	0.299157	0.0231271	2.14337e-06	0.402855	0.357802	0.394217	0.836996	0.000458151	0.692558	3.09538e-07	0.744128	0.587085	0.67183	0.695013	0.467744	0.0115132	0.000589905	0.650984	0.156119	0.343596	0.863333	0.00187789	0.376874	0.000421929	0.50148	0.96989	0.672498	0.000150417	0.0216028	0.48693	0.379354	0.443865	0.288303	0.579564	0.943484	5.72716e-05
HBINH7	0.00135827	1.91541e-08	6.38871e-09	FALSE	0.0931421	0.126804	1.3614	2.86829e-10	0.706151	0.119468	0.807707	0.528898	0.00432492	0.479517	0.317841	0.727626	0.9009	0.498716	0.180783	0.179972	0.2361	0.847347	0.00701669	0.960323	0.474963	0.537309	0.0549586	0.406536	0.79623	0.480631	0.305542	0.043514	0.031223	0.303052	0.01941	0.286198	0.0967413	0.000660407	0.156764	0.269221	0.130539	0.0325328	0.420431	0.00923167	0.286634	0.0900835
MEINH9	0.00143733	1.4294e-08	4.79529e-09	FALSE	0.125223	0.166186	1.32712	5.9445e-11	0.762262	0.850445	0.182257	0.0457156	0.00175924	0.15444	0.439888	0.271059	0.865168	0.0351375	0.64649	0.0212059	0.896156	0.699356	0.439739	0.887021	0.389975	0.0216821	0.00180129	0.853046	0.239717	0.373293	0.0808291	0.017108	0.174166	0.00445937	0.0493692	0.439735	0.0672611	0.184832	0.627425	0.60669	0.0356413	0.369733	0.170817	0.338472	0.963987	0.000724554
HBGLU9	0.00153321	1.45239e-08	4.90506e-09	FALSE	0.15928	0.207542	1.303	1.93839e-12	0.266165	0.104889	0.616054	0.08361	0.000936683	0.365792	0.144328	0.642313	0.287774	0.561866	0.263561	0.0596501	0.200869	0.962696	0.0572468	0.77812	0.169324	0.0495565	0.0137975	0.637719	0.461677	0.399271	0.80392	0.0396521	0.0383955	0.290689	0.0015863	0.401387	0.0250056	0.000117853	0.682298	0.23464	0.0456883	0.195432	0.212546	0.087955	0.83532	0.00608984
SCINH8	0.00156731	1.63464e-08	5.53324e-09	FALSE	0.0616558	0.0870024	1.4111	2.60481e-10	0.887564	0.346904	0.917879	0.065137	0.00212138	0.263153	0.562477	0.401357	0.80637	0.132452	0.193257	0.385648	0.152192	0.754029	0.168897	0.628301	0.890517	0.0544538	0.130961	0.365953	0.539687	0.509669	0.743426	0.152609	0.00599862	0.343183	0.135537	0.823234	0.0837168	0.00481098	0.0373376	0.0623616	0.0793199	0.0723804	0.991435	0.049496	0.104244	0.301235
TEGLU5	0.00159413	1.31872e-08	4.47179e-09	FALSE	0.154567	0.199222	1.2889	5.53922e-12	0.658733	0.00849754	0.192377	0.0717462	7.68867e-05	0.846217	0.419213	0.666333	0.535823	0.0205276	0.945467	5.19116e-07	0.250981	0.768746	0.257687	0.998884	0.159911	0.000945997	3.52977e-09	0.65335	0.168632	0.624612	0.407336	0.00487149	0.0164164	0.000100321	0.0530453	0.72812	0.00338888	0.00013116	0.0198179	0.719953	0.244688	0.253218	0.140446	0.602637	0.998445	9.54146e-08
TECHO	0.001689	1.73828e-08	5.93052e-09	FALSE	0.11401	0.148364	1.30133	2.32795e-10	0.320307	0.638394	0.0939437	0.0456917	0.0117422	0.813449	0.482592	0.647085	0.97341	0.00225706	0.93368	0.0017649	0.1672	0.991074	0.13811	0.856179	0.852076	0.000620393	0.0147465	0.953812	0.572616	0.676296	0.269697	0.0244056	0.577284	0.0417844	0.473692	0.214719	0.125485	0.0910128	0.700031	0.988675	0.157019	0.453203	0.383041	0.485076	0.997996	0.096983
HYPEP1	0.00173778	1.87184e-08	6.40556e-09	FALSE	0.0931239	0.125985	1.35288	6.49821e-09	0.24616	0.00225632	0.416743	0.0396449	0.00813933	0.474136	0.215181	0.13374	0.781504	0.413766	0.590071	0.0761884	0.228159	0.244067	0.137257	0.316363	0.497566	0.478857	0.215728	0.828572	0.671836	0.0139201	0.24592	0.105111	0.142593	0.189201	0.622412	0.255127	0.163567	0.594766	0.0263431	0.260058	0.387872	0.178867	0.423493	0.234374	0.487469	0.0497572
TEGLU24	0.00183817	1.32335e-08	4.55592e-09	FALSE	0.212494	0.271744	1.27883	2.00167e-13	0.838144	0.0446103	0.504947	0.0174642	7.53536e-08	0.183888	0.142763	0.229233	0.57052	0.0110172	0.328534	3.39064e-05	0.0299416	0.703097	0.550766	0.999782	0.336538	0.0442615	9.38318e-08	0.112236	0.39845	0.103706	0.873289	0.015166	0.246108	1.95086e-05	0.198168	0.744503	0.000516775	1.8213e-09	0.301999	0.111267	0.605389	0.580447	0.218199	0.612028	0.996394	6.41246e-06
TEGLU9	0.00184987	1.39693e-08	4.81254e-09	FALSE	0.149516	0.191993	1.2841	3.1874e-12	0.308418	0.0141644	0.320082	0.0157617	9.0114e-07	0.125197	0.29555	0.93054	0.802009	0.000118326	0.872798	5.17296e-07	0.33254	0.921189	0.392389	0.999544	0.134972	0.00332343	2.90264e-10	0.846239	0.16767	0.420676	0.326481	0.00114756	0.0141286	6.76232e-07	0.0364788	0.19204	4.67385e-05	3.71461e-10	0.206361	0.790793	0.0217154	0.194672	0.119516	0.414349	0.985926	1.51966e-07
MEGLU9	0.00203036	1.57497e-08	5.4812e-09	FALSE	0.128651	0.167326	1.30063	2.25056e-10	0.516259	0.0221195	0.0667071	0.0568162	0.0277585	0.0517415	0.872006	0.143027	0.340627	0.00251575	0.890242	3.50064e-07	0.205467	0.944129	0.0495402	0.96326	0.333582	0.000837702	8.47951e-07	0.57289	0.692037	0.183662	0.354793	0.000398767	0.367406	3.89291e-06	0.562522	0.265696	0.063855	0.104022	0.0775936	0.903809	0.214477	0.0647821	0.493229	0.699488	0.998962	8.83209e-07
OBNBL2	0.0020336	1.60177e-08	5.57545e-09	FALSE	0.0818422	0.11328	1.38413	3.92613e-09	0.30164	0.0647637	0.105993	0.227221	1.0685e-05	0.0461277	0.0288044	0.725826	0.0675593	0.776253	0.247743	0.0191573	0.463187	0.402096	0.574885	0.286422	0.0395229	0.00297234	0.00136227	0.063257	0.732539	0.536479	0.0452345	0.176137	0.589996	0.63076	0.256796	0.043955	0.149258	0.0218639	0.618428	0.314725	0.0371896	0.244672	0.0877577	0.167535	0.577796	0.522794
DGGRC2	0.00215663	1.12595e-08	3.94477e-09	FALSE	0.142906	0.185884	1.30074	4.30559e-11	0.826329	0.474175	0.180663	0.292683	2.53206e-07	0.0738614	0.098367	0.163642	0.34547	0.0335271	0.38774	7.58863e-07	0.0424585	0.506582	0.448572	0.740644	0.413778	0.00998986	4.94532e-05	0.191094	0.876567	0.117291	0.295341	0.00203542	0.434896	0.000823164	0.556962	0.979802	0.020532	0.000329936	0.410499	0.316483	0.629955	0.86198	0.390495	0.378837	0.773564	0.000383215
TEGLU20	0.00225866	1.42455e-08	5.01677e-09	FALSE	0.135625	0.176609	1.30218	1.7073e-11	0.582026	0.00424567	0.415156	0.0117142	2.73363e-10	0.0754303	0.0968128	0.661974	0.208163	0.000315226	0.436508	6.64367e-11	0.668208	0.99734	0.120613	0.937826	0.0618695	0.000500142	7.97961e-09	0.0504422	0.215657	0.418223	0.329418	0.00189627	0.0568424	2.23769e-08	0.141259	0.790209	9.6143e-06	6.28815e-10	0.00714884	0.437146	0.286197	0.317935	0.0354674	0.739203	0.997704	2.56604e-11
DGGRC1	0.00276083	1.25981e-08	4.54e-09	FALSE	0.126926	0.168988	1.33139	3.42797e-10	0.193111	0.0839939	0.0621702	0.063371	1.68796e-07	0.0226159	0.0623298	0.524358	0.698175	0.0229456	0.454797	5.66094e-07	0.0992847	0.617914	0.216458	0.916879	0.741275	0.00570962	2.60788e-05	0.197209	0.726911	0.0731876	0.411626	0.00118893	0.539457	0.000691982	0.353917	0.858792	0.0154957	0.00108658	0.0984678	0.164215	0.487025	0.907399	0.750594	0.231104	0.960681	7.70319e-05
HBINH2	0.00282375	1.96651e-08	7.10554e-09	FALSE	0.124888	0.163526	1.30938	1.49243e-09	0.0915858	0.18723	0.328683	0.0653207	0.00379317	0.699722	0.326783	0.439332	0.841653	0.00899312	0.401409	0.0610864	0.256648	0.878056	0.164011	0.760154	0.593244	0.01155	0.00221158	0.814084	0.363849	0.194779	0.536866	0.283145	0.160945	0.0354548	0.434727	0.471183	0.205548	0.0170201	0.305727	0.19334	0.176534	0.321062	0.0698481	0.0335706	0.861941	0.00293027
TEINH17	0.00283508	1.66346e-08	6.01338e-09	FALSE	0.147324	0.195307	1.32569	1.26533e-09	0.174976	0.281297	0.341468	0.0828512	1.43171e-05	0.271255	0.458094	0.809847	0.695154	0.0025166	0.770555	2.3968e-06	0.416038	0.926211	0.0408377	0.575161	0.283377	0.00509574	6.77976e-05	0.37385	0.265151	0.145477	0.365176	0.00450712	0.583038	0.00011534	0.0291178	0.297455	0.197414	3.0517e-05	0.158198	0.813261	0.0189288	0.803939	0.219655	0.220458	0.978265	1.0212e-07
CBGRC	0.00284772	1.71179e-08	6.19134e-09	FALSE	0.0675435	0.0959407	1.42043	2.99181e-08	0.298299	0.115816	0.12886	0.177351	0.0262152	0.315648	0.23746	0.244974	0.678213	0.16986	0.27168	0.00863844	0.813164	0.922272	0.48924	0.673814	0.527209	0.0102543	0.00248803	0.499035	0.527686	0.0466824	0.59348	0.0447777	0.214155	0.0219623	0.728622	0.01034	0.0279314	0.0610862	0.782427	0.364857	0.436357	0.573765	0.740845	0.192745	0.903599	0.0952408
HBSER3	0.00288359	1.69496e-08	6.13952e-09	FALSE	0.119632	0.155981	1.30384	1.08727e-10	0.165272	0.597637	0.377467	0.637661	0.00098236	0.55193	0.055052	0.64296	0.982068	0.0109213	0.503472	0.0379111	0.312629	0.236623	0.289511	0.81011	0.930122	0.0486991	0.0166478	0.138449	0.200088	0.211879	0.269247	0.00316002	0.207013	0.0226635	0.292822	0.110945	0.360833	0.211838	0.430114	0.25471	0.144223	0.0807567	0.821357	0.440247	0.982796	0.0143572
HBCHO4	0.00290971	1.92949e-08	6.99653e-09	FALSE	0.129593	0.170725	1.3174	1.2205e-08	0.241668	0.0336495	0.412871	0.317031	8.0578e-05	0.539136	0.618284	0.464561	0.999725	0.00810221	0.934163	0.019588	0.820487	0.653863	0.0933763	0.996817	0.996254	0.00187737	0.00899659	0.401059	0.0754715	0.860595	0.715947	0.030662	0.0767352	0.00307003	0.0190602	0.361301	0.0259032	0.0114059	0.607072	0.894604	0.139618	0.446055	0.54641	0.146616	0.938407	0.00022789
TEGLU3	0.00303283	1.17345e-08	4.27611e-09	FALSE	0.192964	0.244129	1.26516	1.48343e-12	0.425187	0.00469416	0.351546	0.158508	3.48388e-07	0.359803	0.219177	0.925917	0.441614	0.00135454	0.561309	3.7206e-09	0.862829	0.990715	0.484139	0.999906	0.093668	0.0504572	1.9265e-10	0.172736	0.247168	0.608122	0.492245	0.00167492	0.198243	4.53919e-05	0.247313	0.465242	0.0010279	1.99018e-10	0.280959	0.640112	0.222711	0.697972	0.0391977	0.889162	0.999943	5.30494e-07
TEINH4	0.00318031	1.48328e-08	5.43607e-09	FALSE	0.0999231	0.131617	1.31719	3.3872e-08	0.148756	0.0214866	0.0825281	0.055198	0.000487588	0.176593	0.272475	0.668055	0.868628	0.000221532	0.213926	0.000350551	0.122976	0.197512	0.202808	0.727952	0.917471	0.0231966	6.09683e-05	0.583198	0.429278	0.301905	0.49392	0.00103199	0.18874	0.000332562	0.624184	0.519684	0.540264	6.05826e-05	0.610311	0.333285	0.0708122	0.888124	0.976312	0.0533674	0.667964	0.000142923
HBCHO3	0.00326983	1.91584e-08	7.04503e-09	FALSE	0.191777	0.243508	1.26975	1.97177e-11	0.174126	0.0567301	0.570462	0.167902	6.03444e-05	0.421218	0.611993	0.748699	0.876723	0.29625	0.907937	0.0796814	0.0869587	0.432751	0.0853858	0.967727	0.857152	0.262925	0.0277138	0.751889	0.941299	0.712574	0.649203	0.233167	0.496332	0.403086	0.0433996	0.720275	0.328905	0.0346678	0.385783	0.781359	0.378349	0.390169	0.537429	0.11631	0.860437	0.213662
SCINH10	0.00383604	1.55566e-08	5.8348e-09	FALSE	0.0562348	0.0771045	1.37112	1.19031e-09	0.714455	0.21294	0.844726	0.102884	0.0297082	0.124896	0.795413	0.822439	0.740513	0.372357	0.764042	0.0418225	0.0697157	0.442517	0.100873	0.232658	0.663649	0.113352	0.121154	0.18392	0.465738	0.1738	0.95634	0.102692	0.432485	0.20877	0.977216	0.957558	0.0655872	0.0128745	0.302516	0.543444	0.225499	0.129044	0.908822	0.269563	0.546201	0.212492
TEGLU13	0.00416106	1.2408e-08	4.70228e-09	FALSE	0.165274	0.209684	1.2687	1.36153e-10	0.646163	0.0382331	0.750172	0.100595	2.3673e-06	0.185683	0.346831	0.167595	0.839643	0.0360084	0.775014	5.15968e-06	0.155643	0.51945	0.194786	0.99793	0.176241	0.011088	6.63298e-06	0.336978	0.181305	0.149704	0.200335	0.00875981	0.0250487	1.31176e-07	0.0109514	0.426634	0.00348979	2.33788e-07	0.214921	0.59991	0.479271	0.0233733	0.0653491	0.290775	0.853042	3.14123e-07
DEGLU1	0.00427169	1.05147e-08	3.99829e-09	FALSE	0.229887	0.286634	1.24685	2.20028e-12	0.108023	0.00857822	0.681913	0.357816	9.43062e-05	0.408464	0.0810047	0.680389	0.100099	0.0273466	0.595925	0.00258003	0.229309	0.525459	0.0332479	0.998954	0.108307	3.62926e-05	0.00127332	0.237289	0.0474611	0.300874	0.0172626	0.00116504	0.00897121	0.000263166	0.0244751	0.145299	0.0036816	0.000286966	0.419631	0.486776	0.0957868	0.148541	0.199014	0.825184	0.994313	4.98935e-06
MEGLU4	0.00450818	1.62141e-08	6.2089e-09	FALSE	0.113338	0.152574	1.34618	4.76633e-09	0.597647	0.47343	0.0483219	0.0987652	1.18443e-06	0.0655943	0.301726	0.323353	0.134468	0.0574493	0.645832	0.000609149	0.674101	0.969387	0.446135	0.999443	0.354281	0.00445824	0.000373751	0.618244	0.616159	0.236161	0.833861	0.00663521	0.128147	0.00122455	0.150502	0.251072	0.0017773	0.0118206	0.254721	0.597544	0.18385	0.612637	0.764244	0.0785826	0.849657	1.30302e-08
TEGLU15	0.00467151	1.20699e-08	4.64362e-09	FALSE	0.185921	0.235454	1.26642	7.47046e-12	0.135355	0.204799	0.357677	0.394734	0.000178918	0.404356	0.0348548	0.775725	0.354794	0.000266749	0.856529	3.59101e-07	0.57712	0.511326	0.188899	0.932081	0.45429	0.00643364	3.81776e-07	0.543805	0.101795	0.653905	0.37369	0.00408643	0.216507	4.16862e-06	0.102693	0.554556	0.0328544	0.000387739	0.26533	0.773954	0.00742979	0.0194874	0.423718	0.332309	0.913693	1.98738e-07
TEINH3	0.00553724	2.63634e-08	1.03779e-08	FALSE	0.0869525	0.122395	1.4076	1.21508e-06	0.122335	0.0223951	0.0339415	0.104629	0.0191957	0.0117172	0.237596	0.575623	0.717331	0.103256	0.792065	0.0335659	0.240024	0.136934	0.299172	0.961048	0.840727	0.107638	0.0114544	0.26076	0.177955	0.0585525	0.535703	0.160172	0.188247	0.0576115	0.606817	0.181451	0.404918	0.0421291	0.0284712	0.57357	0.0351162	0.0508219	0.822955	0.100166	0.552717	0.000315832
DEINH4	0.00567239	1.36591e-08	5.39483e-09	FALSE	0.0800122	0.103773	1.29696	5.26759e-09	0.208571	0.110496	0.441099	0.0306178	0.00134887	0.121633	0.727341	0.680188	0.902918	0.0268614	0.980354	2.60083e-05	0.334119	0.696836	0.841869	0.963	0.828144	0.0009462	3.68101e-06	0.154011	0.473095	0.174067	0.20161	0.0368554	0.770564	0.000525987	0.243199	0.501107	0.228847	0.0222817	0.0434888	0.886563	0.459089	0.292535	0.910738	0.318106	0.977977	0.000227378
OBINH5	0.00613772	2.16779e-08	8.65686e-09	FALSE	0.0551307	0.0824008	1.49464	5.71828e-06	0.746239	0.721076	0.377218	0.615595	0.0998416	0.385889	0.0752104	0.273223	0.662213	0.712577	0.119689	0.000285293	0.578797	0.624574	0.0237284	0.438008	0.315056	0.182347	0.0297177	0.338444	0.15643	0.295055	0.692941	0.371071	0.221602	0.547835	0.950137	0.0527522	0.155569	0.0331744	0.813557	0.155262	0.153737	0.217045	0.361542	0.153572	0.434557	0.274756
TEGLU12	0.006197	1.04754e-08	4.18895e-09	FALSE	0.156899	0.199079	1.26884	5.13692e-12	0.0993473	0.00262258	0.54443	0.00438259	5.36544e-07	0.628448	0.194106	0.496577	0.368513	0.0711091	0.905062	6.61746e-07	0.800578	0.971379	0.0925813	0.997307	0.0905382	0.000232717	2.29479e-06	0.231167	0.525002	0.685087	0.232272	0.00879595	0.00505652	0.000174453	0.145584	0.68162	0.00625158	3.1295e-07	0.249494	0.956883	0.0769836	0.599656	0.0528442	0.959173	0.999956	6.00889e-05
DECHO1	0.00650516	1.19126e-08	4.79672e-09	FALSE	0.154902	0.194085	1.25295	6.61047e-11	0.185283	0.116467	0.410205	0.12777	0.00609962	0.22088	0.240639	0.577118	0.788633	0.107346	0.725972	0.00149566	0.228341	0.97862	0.0845086	0.295304	0.735144	0.0219762	0.000734986	0.971734	0.51997	0.824367	0.583804	0.114795	0.35124	0.147642	0.387715	0.323261	0.290726	0.0326637	0.582548	0.85914	0.281219	0.549387	0.224238	0.71828	0.993832	0.263661
SCGLU3	0.00747385	1.98406e-08	8.15263e-09	FALSE	0.0658338	0.0921438	1.39964	5.06477e-08	0.916152	0.206338	0.441571	0.100048	0.0111764	0.0312841	0.181978	0.780115	0.589822	0.286979	0.874299	0.00132505	0.493643	0.906307	0.0968343	0.834445	0.548109	0.00635792	0.00359348	0.174261	0.419069	0.178747	0.547095	0.0808175	0.161821	0.284606	0.511498	0.0780342	0.1698	0.0706669	0.0958782	0.70518	0.164806	0.17599	0.773768	0.0103585	0.591385	0.0833073
DEINH6	0.00764788	1.90657e-08	7.86119e-09	FALSE	0.041562	0.0587631	1.41387	5.55e-06	0.161034	0.0595685	0.694454	0.0215909	0.0604089	0.684952	0.0395345	0.3546	0.272453	0.131844	0.221524	0.168816	0.891847	0.83109	0.0340985	0.489631	0.261543	0.195084	0.594901	0.0771313	0.166403	0.101983	0.434789	0.00749989	0.128091	0.0977573	0.998035	0.138996	0.413011	0.462794	0.101037	0.136452	0.832688	0.193267	0.0893632	0.305748	0.886192	0.376709
MEINH12	0.00770294	3.13499e-08	1.29401e-08	FALSE	0.069068	0.102223	1.48004	2.55247e-05	0.2442	0.479244	0.623181	0.18795	0.00158578	0.367203	0.781958	0.206076	0.720978	0.337642	0.96155	0.0973329	0.347525	0.746856	0.937003	0.990601	0.676516	0.0957393	0.0200404	0.91979	0.230579	0.448956	0.278132	0.00351807	0.234356	0.00382833	0.600318	0.687432	0.0262443	0.088808	0.0808107	0.948412	0.313869	0.592788	0.648523	0.107397	0.97937	0.00941327
MBDOP1	0.00796327	3.14432e-08	1.30438e-08	FALSE	0.0593948	0.0925119	1.55757	6.31467e-05	0.417395	0.025735	0.449461	0.357023	0.415227	0.0811511	0.703834	0.632078	0.916481	0.0219973	0.971299	0.0334022	0.160251	0.506489	0.402635	0.375063	0.757271	0.347021	0.0110356	0.181373	0.942916	0.0549571	0.575664	0.0722283	0.438966	0.0281186	0.871599	0.729255	0.605871	0.957997	0.183606	0.815355	0.155598	0.0317827	0.542946	0.0566617	0.712225	0.0559567
TEGLU18	0.00802744	1.16336e-08	4.83188e-09	FALSE	0.204278	0.257338	1.25975	1.42354e-10	0.721658	0.084683	0.541903	0.0807993	8.53587e-09	0.0305906	0.104054	0.201886	0.55584	0.00387346	0.473788	2.85464e-08	0.0576169	0.838198	0.680821	0.977628	0.612171	0.000299894	1.86743e-09	0.326012	0.404073	0.291681	0.494712	0.00588826	0.113516	5.8678e-06	0.0399563	0.208317	0.000665445	4.07857e-11	0.161221	0.496912	0.296303	0.256301	0.299061	0.685665	0.99799	4.62686e-06
TEGLU11	0.00854557	1.06736e-08	4.47578e-09	FALSE	0.223386	0.278799	1.24806	3.25404e-11	0.572838	0.0013858	0.493778	0.0440426	3.91881e-08	0.2939	0.0435486	0.812156	0.436567	6.51229e-05	0.451404	1.11564e-11	0.0691955	0.985472	0.300704	0.999425	0.0928243	0.00199596	2.73636e-14	0.213447	0.164701	0.328369	0.706681	0.00211615	0.0561837	7.77021e-07	0.183039	0.789408	0.00402372	1.15178e-09	0.0529586	0.46569	0.709359	0.703798	0.0202471	0.865147	0.999748	6.07188e-09
DEGLU3	0.00884738	9.90488e-09	4.17585e-09	FALSE	0.209004	0.256969	1.22949	8.71517e-11	0.250542	0.0117336	0.841338	0.318195	0.00519688	0.691852	0.683274	0.785359	0.650731	0.0490904	0.95509	0.00078792	0.0963901	0.501982	0.0353039	0.940213	0.571663	0.0116706	0.00089872	0.651949	0.419205	0.319591	0.0491306	0.00265662	0.069692	0.00120238	0.0153752	0.376562	0.0222198	0.0038381	0.07185	0.780922	0.198471	0.115646	0.435112	0.874652	0.991944	8.83423e-05
HYPEP3	0.00889385	1.38945e-08	5.86265e-09	FALSE	0.0940007	0.122515	1.30335	2.65524e-10	0.775878	0.459224	0.561736	0.0590099	0.00867949	0.114318	0.172897	0.573599	0.778278	0.00121831	0.639808	0.0170128	0.746001	0.740921	0.146217	0.906804	0.594572	0.00849534	0.00436129	0.146459	0.676364	0.101113	0.608382	0.00134824	0.0317977	8.19704e-06	0.379544	0.716539	0.0108817	0.0954689	0.188084	0.337413	0.895974	0.207312	0.805419	0.186462	0.756675	7.01995e-06
MSN5	0.00923993	1.07416e-08	4.55953e-09	FALSE	0.107588	0.141264	1.31302	1.68817e-09	0.906355	0.0839877	0.0520539	0.206791	0.0030566	0.170262	0.179205	0.230578	0.122876	0.00290984	0.211104	3.1272e-07	0.101034	0.599326	0.0892137	0.941492	0.273516	0.233682	5.0062e-07	0.0992474	0.762983	0.63075	0.469368	0.00284316	0.373494	0.000120908	0.229351	0.239009	0.00623581	5.80136e-05	0.0254854	0.314652	0.1098	0.57774	0.768408	0.660021	0.996303	5.01146e-06
MEGLU6	0.00925044	1.28575e-08	5.45866e-09	FALSE	0.164022	0.20636	1.25813	6.33181e-10	0.84125	0.332082	0.157119	0.0530558	7.30947e-06	0.17114	0.207263	0.377316	0.229883	0.00465218	0.631123	8.27562e-05	0.719454	0.422589	0.233105	0.988328	0.156309	0.00422811	2.41768e-07	0.211239	0.0687072	0.424209	0.10077	0.00154581	0.123901	0.000135254	0.0446738	0.0164547	0.000144715	0.000791507	0.22831	0.369733	0.0832652	0.0580408	0.497618	0.362215	0.964776	4.22038e-08
HBGLU1	0.00928468	1.49728e-08	6.36042e-09	FALSE	0.131959	0.168904	1.27997	5.34704e-08	0.10875	0.851424	0.806071	0.54238	0.00441173	0.554763	0.750068	0.863186	0.590284	0.269594	0.952347	0.0865602	0.643285	0.923256	0.588491	0.664481	0.510052	0.078472	0.000245159	0.251541	0.103192	0.387658	0.111432	0.304585	0.469245	0.186467	0.305745	0.462578	0.00195804	0.143161	0.55893	0.913172	0.0962302	0.90785	0.400995	0.635642	0.998791	0.0292731
TEGLU2	0.00929341	1.09932e-08	4.67059e-09	FALSE	0.165773	0.210672	1.27084	3.13261e-11	0.32258	0.0961611	0.173746	2.57453e-05	1.12829e-06	0.705376	0.0928781	0.853133	0.797983	0.00128482	0.264369	1.03825e-08	0.27501	0.889318	0.125051	0.967046	0.499614	0.00505168	1.16812e-07	0.187908	0.121658	0.337954	0.349389	0.00102008	0.0321035	9.44824e-05	0.290668	0.929316	0.0108301	8.02219e-11	0.115066	0.333044	0.0443811	0.561844	0.323466	0.251391	0.836087	5.44435e-08
HBGLU7	0.0095621	1.11503e-08	4.75876e-09	FALSE	0.195862	0.24671	1.25961	8.07466e-10	0.468305	0.0827904	0.954473	0.488089	0.0132822	0.121277	0.199383	0.849897	0.647169	0.283023	0.282273	0.0125059	0.743305	0.872672	0.0490619	0.998388	0.389303	0.168266	0.00280248	0.533782	0.628438	0.484724	0.268341	0.169233	0.0987227	0.0483231	0.0136271	0.674646	0.0145307	2.16757e-05	0.15116	0.440844	0.346756	0.349592	0.266699	0.636196	0.991469	0.00425578
MEGLU14	0.00970269	1.40756e-08	6.02126e-09	FALSE	0.0885496	0.11802	1.33282	3.48813e-09	0.197876	0.103988	0.924971	0.455219	0.0536281	0.268633	0.303857	0.376908	0.484142	0.00696766	0.777315	0.0252667	0.137901	0.272254	0.42567	0.317408	0.206453	0.00338841	0.00927074	0.164695	0.0381732	0.286854	0.196467	0.0154856	0.530925	0.00224238	0.32636	0.171823	0.271666	0.110929	0.0320957	0.726072	0.53276	0.153006	0.188065	0.0606022	0.432573	0.00208461
TEINH5	0.00990252	1.24917e-08	5.36119e-09	FALSE	0.106868	0.138233	1.29349	1.40165e-07	0.125388	0.133657	0.241058	0.0988186	0.000320395	0.344209	0.677114	0.292886	0.399923	0.00177301	0.74952	0.00108946	0.167929	0.358006	0.585243	0.678212	0.383675	0.0210546	0.00153694	0.53563	0.168284	0.330584	0.0709747	0.000648255	0.0115253	0.00104142	0.0596361	0.186656	0.545912	0.0034744	0.402673	0.724593	0.00510113	0.955584	0.838211	0.13392	0.93412	0.000872005
ENT8	0.00992937	1.74283e-08	7.48317e-09	FALSE	0.143633	0.188118	1.30972	1.37914e-07	0.125852	0.543418	0.262891	0.397227	0.011973	0.0642335	0.0755793	0.198176	0.625891	0.0255319	0.298826	0.238028	0.110937	0.608031	0.142542	0.468293	0.318555	0.195162	0.077588	0.424277	0.443771	0.166764	0.283299	0.368915	0.218423	0.171356	0.128699	0.588247	0.926198	0.228264	0.221538	0.0836534	0.043669	0.06973	0.138096	0.0514122	0.309324	0.344149
HBSER2	0.0100741	1.16624e-08	5.01915e-09	FALSE	0.163395	0.201801	1.23505	4.07398e-10	0.0908306	0.561651	0.537131	0.476988	8.55401e-06	0.531691	0.134587	0.703857	0.695095	0.0851906	0.665209	0.0962494	0.294059	0.252276	0.531802	0.884981	0.736725	0.0562377	0.00585861	0.213941	0.0985165	0.197088	0.763519	0.00732733	0.398359	0.0102095	0.0188234	0.0438253	0.0850474	0.0437176	0.277791	0.334618	0.123374	0.164351	0.478579	0.206811	0.884631	0.00196331
MEINH6	0.01009	1.478e-08	6.36252e-09	FALSE	0.0863448	0.11794	1.36592	9.63107e-10	0.429689	0.545131	0.089453	0.112205	8.1149e-05	0.592558	0.296097	0.227618	0.845573	0.0173302	0.867861	0.0761503	0.386247	0.878732	0.12506	0.97954	0.288016	0.00769058	0.0308414	0.957849	0.907425	0.415601	0.206855	0.0664572	0.00183677	0.00188658	0.159653	0.0988323	0.0191124	0.0524508	0.112297	0.774367	0.00750191	0.290656	0.4748	0.087727	0.77353	0.000255856
HBINH6	0.0102181	1.66765e-08	7.19359e-09	FALSE	0.134696	0.175864	1.30564	3.07271e-07	0.0943239	0.644589	0.148442	0.271005	0.000384585	0.332487	0.0837802	0.410234	0.635003	0.2126	0.404138	0.135868	0.109493	0.194497	0.104242	0.990524	0.0855012	0.0169062	0.0790817	0.346085	0.280483	0.138272	0.191315	0.183753	0.244993	0.345779	0.0598903	0.126799	0.258385	0.0625299	0.233217	0.224693	0.292246	0.0634642	0.12237	0.113442	0.843065	0.0932029
MBCHO1	0.0109777	1.50183e-08	6.55496e-09	FALSE	0.125354	0.163317	1.30284	6.24214e-08	0.107771	0.373954	0.210295	0.38428	0.0159829	0.252302	0.45791	0.5008	0.752018	0.0328752	0.81686	0.0588324	0.087997	0.905686	0.197945	0.652718	0.451422	0.0878851	0.00403313	0.653643	0.308765	0.145697	0.0560628	0.0117609	0.035439	0.0583186	0.00616188	0.0917346	0.245529	0.0312883	0.631719	0.855055	0.30928	0.181937	0.213175	0.44026	0.982246	0.00893822
HBGLU6	0.0113356	1.14319e-08	5.01635e-09	FALSE	0.200022	0.254029	1.27001	1.71771e-10	0.456978	0.597728	0.994553	0.277137	0.0354402	0.0417802	0.450685	0.957022	0.754994	0.229406	0.571871	0.0319581	0.826618	0.776942	0.235589	0.996116	0.278599	0.249694	0.00271286	0.609603	0.485938	0.537212	0.280628	0.194292	0.0541028	0.0189065	0.0196472	0.621112	0.0166807	4.32056e-05	0.279249	0.652048	0.163384	0.508884	0.160236	0.656372	0.977855	0.00422161
OBNBL1	0.0118435	1.20696e-08	5.33541e-09	FALSE	0.0997662	0.130185	1.3049	7.59034e-09	0.201896	0.148354	0.0839883	0.639227	0.015689	0.221104	0.0973719	0.1957	0.158425	0.00236209	0.423922	0.0322877	0.496338	0.781462	0.307745	0.872124	0.0739299	0.0475171	0.0489892	0.478149	0.749218	0.0919674	0.35875	0.0171122	0.0721782	0.0233632	0.0536266	0.00213938	0.0783694	0.0697391	0.212426	0.510428	0.0170949	0.0270038	0.12464	0.0531785	0.284668	0.0185322
ENT9	0.0124963	1.01072e-08	4.50907e-09	FALSE	0.172929	0.220552	1.27539	4.66312e-12	0.167282	0.419626	0.357016	0.351734	3.56401e-05	0.0948595	0.333733	0.863389	0.300166	0.150711	0.137016	0.103998	0.0564845	0.402813	0.474919	0.173789	0.265311	0.50784	0.0180908	0.556625	0.341379	0.163701	0.449273	0.0635535	0.211686	0.389097	0.188817	0.390213	0.696684	0.0191426	0.492499	0.146993	0.587361	0.438585	0.0680502	0.257159	0.491671	0.314965
SEPNBL	0.0128662	1.51922e-08	6.81194e-09	FALSE	0.0476966	0.0675803	1.41688	3.87015e-08	0.240597	0.555985	0.296288	0.0587438	0.0979269	0.21575	0.315186	0.71507	0.777163	0.151226	0.761715	0.0670013	0.999452	0.948525	0.154413	0.993954	0.616663	0.0246993	0.26835	0.97982	0.886337	0.970149	0.297533	0.162666	0.70561	0.0708894	0.735338	0.947406	0.0352221	0.0254286	0.0676615	0.675224	0.103227	0.886144	0.640502	0.085719	0.639306	0.218928
TEINH18	0.0129946	9.59387e-09	4.30919e-09	FALSE	0.166357	0.210842	1.26741	1.39509e-11	0.806101	0.200187	0.251997	0.15944	0.000493184	0.0443927	0.123788	0.259554	0.474783	0.0223413	0.517488	2.40073e-06	0.165354	0.598584	0.0859496	0.718854	0.316377	0.0492881	0.000677056	0.128253	0.44442	0.314401	0.0494576	0.00321499	0.0280091	0.0175547	0.0162487	0.15274	0.196387	3.01155e-05	0.193988	0.345715	0.0920693	0.307331	0.320705	0.386691	0.963596	2.41754e-05
TEINH19	0.0130112	9.80317e-09	4.40418e-09	FALSE	0.181145	0.226509	1.25043	2.78483e-13	0.116351	0.181572	0.0156307	0.190957	1.24842e-05	0.123716	0.472026	0.354953	0.533911	0.00307302	0.761674	2.28355e-05	0.268789	0.824397	0.248194	0.980613	0.526838	0.0192826	0.00544762	0.529634	0.565275	0.615373	0.368935	0.000479874	0.370373	0.00247426	0.092897	0.462828	0.183165	7.2808e-05	0.188081	0.890627	0.0128412	0.219583	0.347859	0.754126	0.999688	0.000483331
MSN4	0.0132764	1.03802e-08	4.67991e-09	FALSE	0.168373	0.214241	1.27242	1.36021e-09	0.798637	0.350383	0.0301638	0.195732	8.54857e-05	0.0671054	0.537704	0.773434	0.0224284	0.00018153	0.678659	1.21629e-09	0.136981	0.801476	0.451485	0.998095	0.083244	0.00380565	1.99632e-08	0.145647	0.336311	0.469702	0.483856	1.62995e-05	0.185394	3.47261e-07	0.515455	0.327032	0.00188683	2.24209e-05	0.000551593	0.781031	0.573176	0.868733	0.140863	0.60851	0.972142	3.81198e-07
MSN2	0.013727	8.35075e-09	3.78718e-09	FALSE	0.161942	0.207719	1.28267	8.5266e-11	0.171814	0.0236671	0.0367147	0.0539695	1.12427e-07	0.0129027	0.0733712	0.685723	0.0253943	0.00320001	0.339541	2.82133e-11	0.0845708	0.653981	0.645295	0.994415	0.147157	0.00251964	5.31157e-10	0.0471576	0.118635	0.19555	0.313671	1.82007e-06	0.119797	1.16496e-06	0.923964	0.477112	0.00258491	5.92701e-09	0.00232604	0.189092	0.133428	0.384121	0.422487	0.494659	0.973966	1.79646e-05
TEGLU8	0.0137859	8.79604e-09	3.99217e-09	FALSE	0.230843	0.283507	1.22814	3.86607e-12	0.375111	0.00363204	0.164289	0.0824543	6.44842e-08	0.228311	0.460532	0.854119	0.541101	0.00123244	0.840015	6.30838e-08	0.398446	0.90774	0.588888	0.999744	0.298339	0.000847686	1.35746e-14	0.819727	0.301704	0.14315	0.406965	0.00148013	0.0905898	0.0015024	0.0423809	0.214542	0.000207859	1.0868e-07	0.30563	0.896188	0.150471	0.402972	0.0895303	0.898164	0.99912	3.35826e-05
TEINH13	0.0140822	1.24847e-08	5.68783e-09	FALSE	0.149853	0.19049	1.27118	1.62326e-09	0.111841	0.253147	0.0475741	0.20188	2.22956e-07	0.309166	0.711682	0.467967	0.940558	0.000174504	0.944336	3.25961e-06	0.390901	0.860942	0.411478	0.953624	0.849579	0.0461037	6.00317e-05	0.647308	0.173019	0.668285	0.218587	0.00164719	0.201192	0.00450985	0.268307	0.83373	0.00121566	2.82014e-06	0.106069	0.942266	0.0425327	0.441481	0.698454	0.132878	0.977366	6.13208e-05
SCGLU1	0.0143539	1.59615e-08	7.29677e-09	FALSE	0.0441683	0.0610635	1.38252	2.0126e-07	0.936709	0.218737	0.380878	0.773718	0.0181933	0.874283	0.491523	0.297445	0.585818	0.744878	0.490147	0.101959	0.851546	0.857313	0.127346	0.130457	0.352643	0.0443396	0.0623422	0.970931	0.994325	0.813736	0.535596	0.225379	0.536294	0.689262	0.247778	0.312177	0.197741	0.648284	0.35869	0.481203	0.569503	0.167757	0.437504	0.103256	0.247058	0.111784
TEINH9	0.014859	1.30635e-08	6.00943e-09	FALSE	0.096582	0.129341	1.33919	4.02967e-08	0.0513434	0.0525452	0.120298	0.344153	3.16564e-05	0.205983	0.484193	0.390452	0.862329	0.207508	0.504435	0.126174	0.191639	0.944558	0.214323	0.998086	0.636621	0.0176235	0.00138268	0.736016	0.49104	0.12755	0.154523	0.172568	0.0456357	0.194764	0.0252117	0.542247	0.338604	0.0035012	0.698028	0.691627	0.0230674	0.492813	0.489426	0.629552	0.999572	0.0400302
MEGLU5	0.0150569	1.31907e-08	6.08261e-09	FALSE	0.151309	0.195886	1.29461	5.53296e-09	0.713879	0.398964	0.0778297	0.392375	8.31612e-06	0.0161814	0.195852	0.199773	0.488372	0.00911033	0.78473	0.000686027	0.673836	0.672051	0.171756	0.994098	0.234052	0.00556317	0.00010274	0.308492	0.123835	0.163932	0.697308	0.0127797	0.101659	0.0219591	0.00985979	0.0529101	0.218459	0.0347552	0.618332	0.751167	0.0423064	0.584474	0.334263	0.0956932	0.965802	0.000252634
MEINH11	0.0152652	1.36903e-08	6.32891e-09	FALSE	0.0630628	0.0844827	1.33966	7.81467e-07	0.413967	0.50478	0.810712	0.11508	0.00100341	0.11144	0.0810804	0.0542547	0.967288	0.0143069	0.337726	0.0864645	0.545923	0.118282	0.818508	0.903964	0.90427	7.37386e-05	0.0122134	0.274383	0.0134382	0.218413	0.647428	0.00597309	0.054108	0.0268046	0.577648	0.151123	0.0758044	2.95107e-05	0.0730389	0.225746	0.0526691	0.825463	0.917882	0.752549	0.992126	0.0031984
MEINH10	0.0154603	1.10577e-08	5.12383e-09	FALSE	0.172756	0.217964	1.26168	1.55601e-10	0.785552	0.647041	0.173318	0.0334199	0.00021012	0.566183	0.252855	0.469991	0.900291	0.00448161	0.87063	0.00400804	0.805545	0.816422	0.54183	0.995874	0.817094	0.0282814	6.64845e-06	0.576663	0.0424828	0.182244	0.20185	0.000393636	0.767665	0.00244837	0.0748784	0.495874	0.00474223	0.0278499	0.106639	0.668852	0.0932827	0.318814	0.511941	0.834972	0.9997	0.00198225
TEINH16	0.0154934	9.90479e-09	4.59141e-09	FALSE	0.155788	0.197651	1.26872	1.35579e-09	0.177995	0.136306	0.187547	0.014881	0.00129564	0.342111	0.369872	0.882382	0.999452	4.64025e-05	0.69538	3.12571e-05	0.319149	0.965473	0.0225515	0.791757	0.971911	0.0106599	7.47291e-06	0.335565	0.0788964	0.328893	0.831207	0.0263684	0.37812	0.00495169	0.421312	0.787347	0.807655	0.000310649	0.093482	0.564163	0.0482134	0.803456	0.922096	0.651317	0.999191	0.00228171
HBADR	0.0162565	1.08445e-08	5.07213e-09	FALSE	0.107349	0.135843	1.26544	1.52181e-09	0.815415	0.17168	0.191006	0.526876	0.0115827	0.283776	0.87358	0.636931	0.676536	0.0435387	0.804166	0.0153273	0.393787	0.554542	0.240857	0.821914	0.778757	0.0261886	0.0045008	0.265591	0.533853	0.57592	0.112964	0.0167169	0.556251	0.253856	0.194456	0.555771	0.612069	0.321149	0.123328	0.877875	0.662497	0.0623496	0.869025	0.684935	0.886118	0.101713
CBINH1	0.017489	1.12141e-08	5.31822e-09	FALSE	0.0805447	0.109884	1.36426	2.52423e-07	0.175672	0.154192	0.617172	0.207427	0.00453199	0.0989999	0.122033	0.913359	0.39565	0.109738	0.264589	0.0582257	0.74709	0.654836	0.894411	0.999807	0.203383	0.00211776	0.0393526	0.890789	0.354069	0.429619	0.325137	0.00490365	0.455883	0.00563105	0.1778	0.692767	0.268335	0.00711766	0.0105218	0.432046	0.399981	0.937409	0.363249	0.338196	0.948358	0.00376405
PSPEP1	0.0179516	1.13139e-08	5.39266e-09	FALSE	0.121631	0.155716	1.28024	1.87315e-08	0.0907533	0.750004	0.737168	0.34319	0.0248182	0.549774	0.0599451	0.699411	0.275297	0.149734	0.575358	0.412664	0.966721	0.747462	0.0980374	0.985036	0.132933	0.131162	0.537324	0.570613	0.157775	0.791312	0.468339	0.519637	0.128477	0.467613	0.114623	0.39609	0.283608	0.116737	0.736167	0.417203	0.00997697	0.701651	0.186983	0.778857	0.974014	0.545001
HBSER4	0.0180797	1.42297e-08	6.7918e-09	FALSE	0.162106	0.204181	1.25955	1.79125e-08	0.0767543	0.22905	0.874371	0.0846242	0.0219177	0.854753	0.155477	0.804176	0.402708	0.326111	0.742649	0.137215	0.316374	0.296578	0.396656	0.905637	0.577977	0.00304352	0.0335733	0.24156	0.505859	0.231889	0.302515	0.0391944	0.446313	0.0446243	0.221253	0.457097	0.379179	0.12185	0.625997	0.498506	0.417253	0.214882	0.575316	0.446757	0.897294	0.00361807
DEINH1	0.0191893	9.72237e-09	4.69501e-09	FALSE	0.132844	0.17022	1.28136	2.14856e-10	0.870903	0.384119	0.207974	0.0671074	2.24475e-05	0.162267	0.0845493	0.938926	0.539796	0.0810811	0.157793	0.000404208	0.14822	0.307307	0.103445	0.8801	0.531324	0.106754	0.000357466	0.619902	0.0985974	0.609352	0.516134	0.0508796	0.027811	0.0108148	0.00121912	0.451361	0.17064	0.00477966	0.521735	0.103253	0.078695	0.394821	0.404159	0.25461	0.943934	5.41394e-05
TEGLU1	0.0203586	8.84932e-09	4.32434e-09	FALSE	0.124655	0.158848	1.2743	4.99322e-11	0.140768	0.0182169	0.107579	0.272205	0.000917563	0.201156	0.251831	0.780246	0.552825	3.78459e-05	0.983362	2.0142e-08	0.834077	0.972019	0.234024	0.997682	0.119093	0.0311011	7.72326e-07	0.555937	0.202641	0.59042	0.122298	2.0912e-06	0.0381911	8.6598e-07	0.0760381	0.592097	0.019085	8.82013e-06	0.170165	0.77782	0.0712451	0.910278	0.0622403	0.302512	0.981969	3.95844e-06
TEGLU16	0.0205541	9.96081e-09	4.87692e-09	FALSE	0.142361	0.177651	1.24789	5.58988e-09	0.806619	0.00696385	0.0172972	0.0623489	4.9266e-05	0.642579	0.177093	0.61529	0.740021	0.0206609	0.597787	8.93887e-10	0.395824	0.633964	0.356439	0.983859	0.516463	0.0029351	6.46493e-08	0.164736	0.267858	0.255329	0.242667	1.3041e-05	0.0214863	6.66568e-07	0.0835409	0.184795	0.000250977	2.55283e-05	0.0579546	0.286466	0.0198493	0.379858	0.331509	0.48087	0.971527	2.54558e-10
HBGLU10	0.0208692	9.60323e-09	4.71644e-09	FALSE	0.0828833	0.105665	1.27487	1.82831e-08	0.59798	0.690519	0.975996	0.07463	2.04479e-07	0.750087	0.295623	0.265696	0.802231	0.406586	0.188546	0.00934991	0.144538	0.889792	0.170102	0.926376	0.686022	0.0259926	0.0150864	0.533442	0.4628	0.103366	0.370341	5.03715e-05	0.270391	0.00802161	0.369201	0.320893	0.000474446	0.0169327	0.137784	0.0817225	0.00137144	0.345921	0.856303	0.443261	0.943924	0.0173853
PSPEP3	0.0219949	1.05285e-08	5.22716e-09	FALSE	0.136047	0.174253	1.28083	8.98531e-09	0.111915	0.329079	0.694374	0.484653	0.293983	0.591834	0.174944	0.89648	0.122921	0.0341341	0.855457	0.623912	0.933988	0.742404	0.187779	0.969705	0.0402923	0.252053	0.439498	0.240514	0.23563	0.851618	0.0477976	0.0583376	0.0551887	0.685529	0.00951718	0.148649	0.0611823	0.112717	0.626518	0.700094	0.0376122	0.785703	0.110283	0.579504	0.937135	0.538782
DEINH2	0.0225753	1.49662e-08	7.47094e-09	FALSE	0.1131	0.151275	1.33753	7.3977e-08	0.737236	0.491451	0.216181	0.109758	1.6428e-05	0.395168	0.142078	0.941829	0.446063	0.0122334	0.288854	0.000115369	0.799431	0.463441	0.248003	0.939962	0.328276	0.100303	0.000241555	0.855473	0.259556	0.901007	0.540814	0.0365166	0.0266471	0.00842616	0.00744318	0.582797	0.152239	0.0335664	0.712474	0.453822	0.0583281	0.214873	0.261657	0.213414	0.880532	2.3572e-05
PSNF1	0.0232008	1.11732e-08	5.6098e-09	FALSE	0.120732	0.156791	1.29867	6.27421e-09	0.116947	0.30137	0.0928572	0.115089	0.127322	0.202391	0.136967	0.959609	0.918143	0.0651528	0.601282	0.188419	0.626151	0.375525	0.0378892	0.960694	0.757564	0.117754	0.269869	0.769403	0.11102	0.899311	0.640512	0.289039	0.144342	0.160068	0.0800805	0.76982	0.478189	0.061458	0.0722777	0.683574	0.474191	0.21442	0.54044	0.753548	0.996569	0.308533
HYPEP5	0.0232384	1.23079e-08	6.18164e-09	FALSE	0.0699594	0.0924246	1.32112	1.24109e-06	0.810388	0.434312	0.0247643	0.915696	0.151131	0.451418	0.345006	0.105589	0.509349	0.216678	0.645246	0.20015	0.0417792	0.38813	0.0936524	0.141502	0.395809	0.108603	0.212726	0.836476	0.924411	0.169267	0.548483	0.35317	0.693714	0.157757	0.394643	0.348635	0.0776638	0.197326	0.18907	0.605676	0.0321591	0.082994	0.613455	0.100185	0.629589	0.0589088
TEINH2	0.024352	9.93885e-09	5.0421e-09	FALSE	0.160492	0.200465	1.24907	7.68102e-10	0.390422	0.011715	0.413527	0.0677128	1.46814e-07	0.143074	0.594457	0.580737	0.935079	0.00665931	0.78208	1.95115e-05	0.119636	0.471172	0.14602	0.963637	0.76546	0.00516258	1.21681e-05	0.369659	0.539338	0.493759	0.8572	0.0102279	0.360902	0.00676153	0.580257	0.409736	0.0190018	9.08639e-05	0.495457	0.8045	0.683315	0.315136	0.335222	0.715473	0.999288	0.00975505
PSPEP2	0.0250378	9.32685e-09	4.76025e-09	FALSE	0.149879	0.188963	1.26077	1.84613e-09	0.0844886	0.42211	0.580702	0.276109	0.0241705	0.906064	0.18215	0.852647	0.111002	0.0441548	0.585925	0.814288	0.647431	0.786361	0.191482	0.695195	0.110145	0.183623	0.756929	0.356528	0.496443	0.612979	0.0798395	0.486528	0.0601175	0.345697	0.0494257	0.640419	0.0558303	0.229447	0.76228	0.526463	0.100483	0.672414	0.115498	0.968945	0.973464	0.52118
DEINH7	0.0258983	1.85083e-08	9.51674e-09	FALSE	0.038092	0.0535181	1.40497	0.00034839	0.721444	0.424067	0.901198	0.753902	0.00496572	0.0470375	0.724214	0.251161	0.502885	0.883524	0.954209	0.100145	0.671042	0.341939	0.365414	0.546552	0.694047	0.134239	0.395914	0.731801	0.619692	0.979763	0.719561	0.648432	0.514724	0.759392	0.266988	0.417419	0.173305	0.117498	0.651887	0.53561	0.39472	0.417873	0.757194	0.0835208	0.191398	0.452881
SCGLU4	0.0261686	1.85865e-08	9.57894e-09	FALSE	0.0836003	0.115919	1.38658	4.34387e-05	0.7746	0.621091	0.597497	0.3238	0.000300557	0.0113075	0.021408	0.86465	0.772966	0.593601	0.137138	0.00478648	0.0890685	0.937006	0.0302789	0.222361	0.839571	0.0292352	0.0245597	0.00591797	0.343527	0.0100894	0.589775	0.148937	0.485223	0.249706	0.851774	0.937125	0.261939	0.283253	0.0318952	0.0221768	0.18978	0.165566	0.991208	0.0223869	0.288766	0.107691
SCGLU2	0.026699	2.93139e-08	1.51753e-08	FALSE	0.061435	0.0907544	1.47724	0.000119073	0.872638	0.814335	0.292136	0.528705	0.00507497	0.0144581	0.165267	0.502427	0.440061	0.22534	0.38671	0.0254869	0.202217	0.994081	0.00853433	0.674222	0.72404	0.0494616	0.055165	0.103362	0.758489	0.418315	0.27044	0.318445	0.258203	0.0739902	0.309519	0.290618	0.371994	0.0380105	0.63898	0.555922	0.0595495	0.0277084	0.911734	0.0204869	0.340989	0.0356889
SCINH3	0.0276715	2.92792e-08	1.528e-08	FALSE	0.0627529	0.0938099	1.49491	0.000173441	0.561811	0.0438543	0.231082	0.518399	0.0837124	0.0725411	0.0554437	0.379987	0.581973	0.263442	0.0912926	0.0483585	0.0753856	0.690576	0.513298	0.4083	0.667856	0.0019965	0.112363	0.474547	0.0267652	0.138244	0.659463	0.122685	0.312285	0.100755	0.526416	0.263603	0.176511	0.115767	0.0636083	0.0202223	0.0514504	0.112186	0.396775	0.0496228	0.342021	0.473888
SCINH1	0.0311034	1.21079e-08	6.49279e-09	FALSE	0.0581442	0.0797661	1.37187	2.7539e-08	0.391395	0.276757	0.840878	0.676755	0.0400652	0.146923	0.368299	0.274498	0.27148	0.3885	0.122794	0.00556475	0.291665	0.94366	0.0800624	0.53593	0.0126588	0.316395	5.51632e-06	0.209097	0.739738	0.816409	0.882901	0.159506	0.209711	0.0337211	0.158115	0.188878	0.272002	0.00491455	0.283538	0.174014	0.0129423	0.0511281	0.0175366	0.0862856	0.253901	0.00939526
SCINH5	0.0315418	1.21121e-08	6.51676e-09	FALSE	0.0806733	0.107952	1.33814	1.76257e-08	0.132803	0.211678	0.781262	0.189878	2.3933e-05	0.0245242	0.0886748	0.397736	0.624402	0.158497	0.24398	0.000871637	0.839705	0.598836	0.441822	0.679115	0.0945592	0.0485365	0.00929574	0.911248	0.0920435	0.575053	0.730136	0.100808	0.244102	0.0581028	0.498733	0.370938	0.0109582	0.000450949	0.182827	0.109166	0.0391795	0.326583	0.0240626	0.431617	0.887172	0.0425538
TEGLU7	0.0329889	7.85569e-09	4.27271e-09	FALSE	0.239491	0.291755	1.21823	1.41541e-10	0.552326	0.0937125	0.612962	0.0865057	4.69561e-08	0.0374329	0.0410944	0.823851	0.859906	0.0749121	0.618545	5.1535e-08	0.110735	0.898618	0.268196	0.998558	0.699321	0.00343682	1.48461e-07	0.164446	0.104362	0.194341	0.438244	0.00652276	0.305014	0.000596239	0.198624	0.527852	0.0166454	2.78288e-06	0.428773	0.44838	0.315459	0.476857	0.458629	0.78112	0.984852	3.61216e-06
MEINH8	0.0333875	1.43402e-08	7.82254e-09	FALSE	0.0619003	0.0836733	1.35174	1.26127e-05	0.90492	0.0526337	0.248913	0.0321911	0.0626709	0.452566	0.915668	0.576096	0.995995	0.0172418	0.767081	0.015818	0.824853	0.59723	0.240026	0.952797	0.985737	0.436507	0.0207816	0.545933	0.253863	0.102851	0.704999	0.237263	0.6859	0.137853	0.592856	0.2414	0.103828	0.0392749	0.476278	0.926301	0.376894	0.0364947	0.721675	0.766924	0.999448	0.344266
TEGLU22	0.0346716	7.25751e-09	3.99604e-09	FALSE	0.198909	0.244915	1.23129	4.47235e-11	0.378655	0.0091328	0.750478	0.17006	2.73847e-07	0.297931	0.0854098	0.364087	0.36275	0.0432205	0.485151	3.38451e-08	0.0352613	0.867029	0.256505	0.973237	0.138317	0.03408	1.15488e-08	0.269025	0.64687	0.347368	0.84145	0.000423756	0.0488521	0.000330698	0.0184314	0.314023	0.00669959	5.73676e-06	0.502368	0.408473	0.201727	0.367534	0.183372	0.919069	0.999882	0.000190789
HBCHO1	0.0355469	1.9673e-08	1.08999e-08	FALSE	0.082892	0.114048	1.37586	5.51156e-05	0.873469	0.0187133	0.744754	0.159289	0.04713	0.611537	0.123205	0.593115	0.235057	0.0667042	0.309364	0.0270219	0.103463	0.758559	0.170444	0.906219	0.557043	0.0504181	0.12102	0.522604	0.767107	0.0798168	0.00707455	0.530337	0.0907983	0.560536	0.370218	0.537788	0.0430438	0.00840546	0.381528	0.37759	0.185179	0.0594587	0.806733	0.305024	0.982544	0.538156
SCINH9	0.0395052	1.21802e-08	6.93454e-09	FALSE	0.0520679	0.0722526	1.38766	1.19692e-06	0.822754	0.389272	0.984065	0.424116	0.0158641	0.436458	0.535927	0.472905	0.222135	0.537913	0.386933	0.548654	0.446731	0.714496	0.378008	0.651715	0.462632	0.033413	0.292488	0.763434	0.799249	0.974941	0.646722	0.479468	0.116462	0.408321	0.149931	0.766401	0.656063	0.138629	0.57142	0.171897	0.257822	0.167033	0.870828	0.102858	0.171639	0.68543
PSPEP5	0.0406528	1.05974e-08	6.07941e-09	FALSE	0.0817365	0.106025	1.29716	1.66014e-06	0.183779	0.712146	0.486956	0.801951	0.223629	0.637237	0.17539	0.743513	0.146691	0.645738	0.893716	0.71714	0.653497	0.657447	0.469679	0.472093	0.30388	0.200768	0.47801	0.4975	0.227884	0.71483	0.124508	0.908462	0.136669	0.784129	0.380349	0.507893	0.182041	0.226258	0.516464	0.803604	0.227245	0.960024	0.410635	0.761704	0.841175	0.923506
HYPEP2	0.0429835	1.00058e-08	5.82724e-09	FALSE	0.0557129	0.071205	1.27807	5.39364e-06	0.849507	0.139326	0.658908	0.0600671	0.478689	0.0690356	0.778357	0.732054	0.781601	0.0742219	0.879623	0.00577034	0.11669	0.275413	0.409323	0.552064	0.862111	0.051026	0.11119	0.713969	0.991641	0.414197	0.627473	0.0234774	0.762678	0.0216343	0.884331	0.0690415	0.02743	0.4191	0.0608244	0.768102	0.249424	0.340613	0.702782	0.818648	0.866539	0.0136972
SCGLU6	0.0430117	9.00464e-09	5.24514e-09	FALSE	0.0621788	0.0803007	1.29145	4.57231e-06	0.857628	0.493883	0.859151	0.117155	0.0243777	0.227674	0.253216	0.519971	0.964985	0.594772	0.156336	0.0277709	0.29564	0.988055	0.196853	0.344295	0.880824	0.150392	0.00306123	0.594622	0.893479	0.806919	0.793874	0.118522	0.666725	0.83394	0.747776	0.514353	0.00354259	0.53184	0.540502	0.0424894	0.307669	0.383305	0.965253	0.411526	0.597961	0.711482
TEINH7	0.0440573	1.2227e-08	7.16943e-09	FALSE	0.066268	0.0886408	1.33761	2.84633e-06	0.0569484	0.042231	0.266241	0.193044	0.00226596	0.543429	0.651674	0.306903	0.49157	0.110645	0.785371	0.00960585	0.0450976	0.246656	0.546854	0.649856	0.601743	0.0191418	0.00238681	0.107308	0.628676	0.0327649	0.682731	0.00793291	0.24683	0.0622737	0.14037	0.709492	0.300129	0.0278029	0.811986	0.871401	0.526801	0.488015	0.944937	0.13302	0.678087	0.0551183
HBGLU8	0.0447996	9.87474e-09	5.81717e-09	FALSE	0.115314	0.146604	1.27135	3.7459e-08	0.156102	0.428358	0.628922	0.640558	0.442241	0.432266	0.398185	0.989609	0.9406	0.841861	0.911295	0.133041	0.723038	0.993227	0.118922	0.999785	0.800841	0.233871	0.0343858	0.485763	0.532683	0.737137	0.53195	0.701988	0.623697	0.117666	0.0792679	0.373994	0.184677	0.00287441	0.870873	0.679958	0.245626	0.389661	0.605962	0.520793	0.897125	0.0407846
TEINH8	0.0508774	1.401e-08	8.56144e-09	FALSE	0.0565038	0.0771779	1.36589	6.04874e-05	0.505111	0.148583	0.291524	0.244937	0.000137584	0.121873	0.566575	0.252303	0.624212	0.0767886	0.248013	0.126463	0.140329	0.317229	0.308061	0.464417	0.83601	0.256246	0.0321719	0.439865	0.518983	0.35257	0.131305	0.112994	0.0539133	0.189071	0.0417312	0.285499	0.25728	0.00250631	0.521248	0.31291	0.251575	0.78299	0.79602	0.0350295	0.325916	0.0641537
SCINH7	0.0545242	8.87685e-09	5.53943e-09	FALSE	0.0523753	0.07171	1.36916	9.16225e-09	0.706582	0.344098	0.943375	0.301987	0.000631631	0.161152	0.600987	0.188221	0.522556	0.09454	0.586843	0.0622406	0.437379	0.889309	0.051921	0.216397	0.174608	0.496359	0.0326984	0.778037	0.861619	0.772115	0.430148	0.00490324	0.2001	0.00223191	0.149861	0.562505	0.0180735	0.00172003	0.299611	0.180573	0.0468627	0.436641	0.217599	0.163892	0.663027	0.00226192
DECHO2	0.0554765	7.89586e-09	4.95372e-09	FALSE	0.0877819	0.113309	1.2908	2.46936e-07	0.189321	0.250133	0.433665	0.0576308	0.00349742	0.284609	0.190818	0.513264	0.660489	0.0217043	0.319795	0.0540645	0.795066	0.111237	0.752766	0.99876	0.3859	0.0823041	0.140247	0.457932	0.831365	0.522907	0.00861837	0.088951	0.159141	0.0892187	0.0760287	0.0785765	0.0691457	0.0219843	0.281477	0.361551	0.0169891	0.186766	0.0678717	0.246094	0.563117	0.153074
MSN3	0.0559265	5.99114e-09	3.7682e-09	FALSE	0.153427	0.189674	1.23625	6.07734e-09	0.774829	0.0437077	0.129567	0.171692	1.16718e-05	0.0723586	0.53135	0.519798	0.0511623	0.0159403	0.616227	3.29759e-10	0.0864609	0.870912	0.358866	0.987315	0.0493978	0.0279603	8.42724e-08	0.0996837	0.436794	0.242294	0.478837	2.42095e-05	0.0968739	4.10751e-06	0.581793	0.651081	0.0566634	2.40102e-06	0.00289851	0.390359	0.58863	0.865257	0.17574	0.78043	0.983587	1.78216e-05
HBSER1	0.0575738	8.62366e-09	5.4737e-09	FALSE	0.131758	0.16452	1.24866	2.63227e-08	0.139565	0.76419	0.418374	0.629472	0.0281191	0.194764	0.118603	0.645636	0.576982	0.0803022	0.697531	0.032929	0.392372	0.52699	0.15988	0.813187	0.822383	0.0660169	0.00207851	0.348594	0.175962	0.129191	0.359552	0.178722	0.256451	0.029564	0.074006	0.219893	0.0492434	0.104652	0.157793	0.566078	0.1163	0.204349	0.518289	0.654608	0.871104	0.0208911
PSNP5	0.0578338	8.53831e-09	5.42728e-09	FALSE	0.146406	0.184339	1.25909	1.48688e-07	0.0511876	0.482271	0.804237	0.730925	0.472187	0.586246	0.25913	0.655893	0.419647	0.697985	0.925939	0.914343	0.872847	0.853464	0.0840518	0.612635	0.160822	0.512611	0.743605	0.0269159	0.410035	0.697079	0.118433	0.787326	0.016771	0.802995	0.126558	0.117555	0.510552	0.161726	0.539151	0.766202	0.490593	0.522942	0.166053	0.696739	0.927546	0.844541
MEINH14	0.0592362	3.13477e-08	2.0079e-08	FALSE	0.0374455	0.056972	1.52146	0.0122114	0.909042	0.0833225	0.34635	0.00711217	0.438038	0.481067	0.0724007	0.276932	0.635439	0.0400154	0.27473	0.0316864	0.290113	0.433311	0.265084	0.360733	0.335079	0.153154	0.0702679	0.573911	0.741386	0.22766	0.301882	0.0597805	0.324804	0.0302981	0.476042	0.005779	0.0427927	0.265835	0.179832	0.49835	0.133701	0.23012	0.0814037	0.335037	0.919746	0.0172828
MBDOP2	0.0623457	7.38427e-09	4.80942e-09	FALSE	0.0980606	0.121825	1.24235	4.90298e-08	0.135617	0.00471039	0.493566	0.27624	0.00214364	0.239294	0.229214	0.868541	0.283229	0.0190958	0.707036	0.14889	0.0545264	0.588373	0.0880443	0.96473	0.513468	0.166447	0.0163431	0.275259	0.652274	0.2377	0.52921	0.136809	0.394626	0.0116639	0.305649	0.100458	0.0241218	0.104431	0.133214	0.428356	0.204749	0.00691678	0.458939	0.433865	0.988846	0.0059757
TEINH20	0.0624536	9.28313e-09	6.04962e-09	FALSE	0.129479	0.16415	1.26778	9.65402e-08	0.256929	0.343041	0.191775	0.00988884	1.13168e-07	0.0651412	0.286532	0.360326	0.64933	0.0116138	0.547736	0.000161842	0.221426	0.88653	0.0291077	0.994546	0.403275	0.0731727	3.13613e-05	0.862056	0.53385	0.426273	0.435905	0.0455255	0.284648	0.0101491	0.284916	0.811486	0.0577232	3.40648e-05	0.131698	0.814376	0.0844545	0.410899	0.363962	0.658554	0.998856	0.00011917
SCGLU10	0.0626434	8.53684e-09	5.56888e-09	FALSE	0.0484602	0.0650109	1.34153	4.18688e-07	0.49662	0.538294	0.547916	0.484663	0.0259231	0.0772796	0.391731	0.840463	0.624126	0.720392	0.139369	0.136063	0.331601	0.671047	0.10514	0.968478	0.283248	0.27167	0.434104	0.389864	0.93396	0.153174	0.38796	0.0467881	0.493412	0.166649	0.0163639	0.132264	0.182143	0.615854	0.0341351	0.127238	0.0937171	0.211544	0.366321	0.146029	0.577968	0.0835671
TEINH14	0.0640561	7.13328e-09	4.68805e-09	FALSE	0.121798	0.153251	1.25824	1.02318e-07	0.171921	0.0545849	0.387136	0.0315632	3.75144e-05	0.562979	0.724388	0.489847	0.957519	0.00184935	0.901483	3.86357e-06	0.427348	0.724476	0.338304	0.908665	0.759676	0.00353449	9.62277e-07	0.88992	0.43281	0.673211	0.985014	0.000380293	0.332028	0.000141661	0.546147	0.77079	0.346429	0.000462746	0.552981	0.734425	0.146006	0.934714	0.839564	0.64054	0.99597	0.0001784
OBINH4	0.0662506	7.89749e-09	5.2499e-09	FALSE	0.0703998	0.0897233	1.27448	3.89414e-05	0.732072	0.932434	0.0600159	0.133397	0.388116	0.671897	0.617481	0.89663	0.446212	0.0935653	0.808764	0.000713003	0.588048	0.332955	0.532631	0.763535	0.338952	0.0465068	0.00813879	0.992559	0.293412	0.904027	0.431479	0.274197	0.874575	0.0275348	0.941423	0.343318	0.557114	0.0345251	0.271011	0.562778	0.827983	0.321286	0.173669	0.0802339	0.20693	0.0783692
CBNBL1	0.0663725	9.64766e-09	6.41738e-09	FALSE	0.0549283	0.0717183	1.30567	0.000207162	0.312251	0.81025	0.0589406	0.38617	0.106252	0.151265	0.628044	0.198639	0.291823	0.00754169	0.64922	0.0245245	0.846825	0.951974	0.569327	0.980815	0.202581	0.550521	0.0164754	0.847654	0.772493	0.310159	0.669153	0.141781	0.710607	0.000816587	0.718264	0.264956	0.0988056	0.00213797	0.328022	0.762636	0.0425155	0.291319	0.83145	0.406108	0.834605	0.0735314
TEINH6	0.0698545	8.23189e-09	5.57385e-09	FALSE	0.0722516	0.0937939	1.29816	6.89692e-07	0.318123	0.0681105	0.0802639	0.0428029	0.00564781	0.338472	0.828477	0.1169	0.881869	0.00649741	0.395143	0.00101861	0.553481	0.537788	0.754774	0.732768	0.828526	0.188062	0.00185081	0.261335	0.304171	0.0810643	0.312992	0.00591864	0.0397925	0.00401941	0.693348	0.0728877	0.536207	0.0161258	0.430432	0.191006	0.109613	0.742512	0.90818	0.275733	0.673739	0.00261691
ENT1	0.0720003	1.74533e-08	1.19457e-08	FALSE	0.0801189	0.107872	1.3464	0.000534011	0.923472	0.49275	0.603917	0.600385	0.0160209	0.0806729	0.0872275	0.404399	0.587906	0.85973	0.0508761	0.83737	0.850512	0.416283	0.900298	0.968161	0.198183	0.67337	0.904686	0.683693	0.956473	0.755283	0.0809958	0.653187	0.709704	0.914518	0.976492	0.707784	0.498229	0.461963	0.664103	0.0492952	0.961728	0.0819713	0.556636	0.495266	0.971302	0.76345
DEGLU2	0.0721399	6.86822e-09	4.70414e-09	FALSE	0.176296	0.214957	1.21929	6.53468e-09	0.24554	0.192873	0.445396	0.336198	0.00280676	0.545732	0.212117	0.794329	0.648462	0.182067	0.762689	0.021832	0.118926	0.67187	0.0058684	0.997465	0.341781	0.000306386	0.0168419	0.638086	0.528779	0.329041	0.120487	0.0225649	0.208176	0.0153845	0.092882	0.222732	0.00273022	0.000816754	0.245311	0.802133	0.247022	0.22853	0.346281	0.746102	0.980152	0.000379144
PSPEP4	0.0790418	6.22137e-09	4.40748e-09	FALSE	0.125616	0.157879	1.25684	2.14121e-08	0.202054	0.614859	0.488237	0.771492	0.0311683	0.981228	0.605289	0.31883	0.0760499	0.333446	0.896588	0.489422	0.739756	0.901763	0.0959129	0.994192	0.0076004	0.365758	0.22716	0.0618004	0.387382	0.293737	0.162357	0.265889	0.158788	0.904765	0.0883327	0.633582	0.114675	0.143096	0.655334	0.879342	0.135211	0.98594	0.0041897	0.765287	0.969119	0.802151
HBGLU4	0.0814059	8.91496e-09	6.38755e-09	FALSE	0.0831108	0.105398	1.26817	2.04446e-06	0.384536	0.446948	0.769829	0.517119	0.145237	0.22717	0.381235	0.913094	0.447805	0.228	0.257713	0.208376	0.804272	0.738334	0.703059	0.999949	0.519828	0.208173	0.147089	0.413693	0.925795	0.23556	0.0678896	0.844973	0.107544	0.064834	0.0402274	0.180645	0.396217	0.13241	0.208967	0.274061	0.0281426	0.369386	0.295961	0.578907	0.920928	0.410319
CBINH2	0.0860432	9.47623e-09	6.93959e-09	FALSE	0.0481228	0.0642519	1.33516	9.33528e-05	0.273808	0.896125	0.208519	0.816711	0.33407	0.682329	0.824397	0.664684	0.92852	0.0406737	0.921002	0.0296498	0.771173	0.737162	0.280936	0.566283	0.263201	0.0412022	0.0313918	0.597544	0.318948	0.55945	0.0827322	0.0170424	0.558148	0.00951145	0.391231	0.434042	0.36405	0.0160955	0.393499	0.983654	0.441539	0.480752	0.334994	0.585781	0.986749	0.0340205
PSNF3	0.0876325	7.89706e-09	5.82603e-09	FALSE	0.116081	0.147837	1.27357	1.84222e-07	0.0697927	0.347267	0.151885	0.113674	0.0187279	0.682939	0.269088	0.961464	0.334387	0.2034	0.81961	0.462938	0.766393	0.184304	0.0523378	0.982975	0.104619	0.508369	0.622832	0.253917	0.668665	0.960665	0.566339	0.470518	0.125029	0.284569	0.0737758	0.612097	0.730916	0.229615	0.14706	0.923447	0.0560883	0.504682	0.0328923	0.912529	0.974865	0.615746
PSNP6	0.0876467	6.35471e-09	4.68847e-09	FALSE	0.16518	0.203663	1.23297	1.85641e-07	0.165272	0.749272	0.894406	0.400056	0.157958	0.560008	0.156259	0.779639	0.355618	0.647297	0.831262	0.812319	0.729773	0.902541	0.318139	0.758621	0.172935	0.097983	0.557675	0.0631132	0.194477	0.675116	0.619216	0.788612	0.210633	0.985612	0.316679	0.365287	0.740266	0.279846	0.408231	0.605597	0.144432	0.635045	0.10236	0.779083	0.941073	0.932097
MEINH1	0.0881487	8.82243e-09	6.52429e-09	FALSE	0.0464638	0.062161	1.33784	9.03271e-05	0.792532	0.36996	0.835999	0.270827	0.0241388	0.0677153	0.551836	0.894272	0.747501	0.0785513	0.361916	0.182898	0.381642	0.292144	0.896915	0.982762	0.810073	0.182308	0.067273	0.786463	0.7328	0.407942	0.469303	0.0243697	0.371204	0.0150552	0.0355746	0.62443	0.689327	0.0292212	0.0252261	0.792366	0.452448	0.668348	0.658164	0.610506	0.902916	0.0715313
TEINH10	0.0939381	7.10771e-09	5.39735e-09	FALSE	0.131406	0.166981	1.27072	3.234e-07	0.113584	0.0239451	0.160217	0.0846217	0.0402039	0.23506	0.684683	0.485069	0.966335	0.0185303	0.955938	0.0278244	0.151091	0.947095	0.358463	0.956668	0.779112	0.00301915	0.000939998	0.456344	0.382928	0.215096	0.854454	0.0517426	0.34032	0.131467	0.289625	0.772706	0.516512	0.054362	0.194536	0.971831	0.0552674	0.403223	0.614233	0.664847	0.99992	0.0417754
SCINH11	0.101045	8.36756e-09	6.55961e-09	FALSE	0.0505106	0.068244	1.35108	3.76065e-06	0.956371	0.0503538	0.789511	0.296433	0.261075	0.191108	0.252413	0.601641	0.413297	0.938908	0.240922	0.901873	0.159949	0.431885	0.692678	0.822254	0.197481	0.60393	0.741609	0.965647	0.523523	0.705384	0.132982	0.925056	0.614582	0.942138	0.784266	0.390384	0.24872	0.935385	0.765912	0.140442	0.148303	0.104376	0.342705	0.438879	0.483664	0.903535
SCGLU9	0.101804	7.55241e-09	5.94052e-09	FALSE	0.0551313	0.0732077	1.32788	1.33015e-05	0.832739	0.4726	0.738842	0.15527	0.0285105	0.120228	0.61758	0.8153	0.544935	0.923849	0.626361	0.316273	0.216218	0.839225	0.145493	0.661295	0.502679	0.164752	0.141326	0.781969	0.953982	0.389888	0.576747	0.167419	0.661272	0.719318	0.67833	0.825494	0.0253265	0.529027	0.408296	0.647634	0.0123458	0.218295	0.844339	0.361552	0.468522	0.612241
TEINH21	0.101873	7.16204e-09	5.63519e-09	FALSE	0.109902	0.138382	1.25915	5.17499e-07	0.113319	0.467791	0.441298	0.0406828	0.0114736	0.0967485	0.332895	0.125913	0.611514	0.377438	0.578058	1.77308e-05	0.11645	0.619372	0.036713	0.726254	0.580243	0.0868497	0.00111782	0.734648	0.69584	0.475182	0.115796	0.262034	0.347012	0.231852	0.099713	0.0247289	0.173017	0.00239924	0.188129	0.732628	0.0405076	0.0465671	0.597261	0.379344	0.994342	0.176725
HYPEP4	0.10694	8.03682e-09	6.46584e-09	FALSE	0.0584165	0.0744878	1.27512	1.958e-05	0.186681	0.224346	0.269689	0.0708195	0.411078	0.522019	0.322064	0.214067	0.157073	0.159922	0.902973	0.380842	0.283943	0.549356	0.328251	0.450359	0.132175	0.0217195	0.441805	0.751413	0.923369	0.337547	0.346254	0.123389	0.578288	0.0168672	0.367463	0.176223	0.0884068	0.29064	0.214634	0.874224	0.337302	0.109798	0.169403	0.00829122	0.0829345	0.0275878
DEINH8	0.108778	9.37766e-09	7.60525e-09	FALSE	0.038509	0.0503935	1.30862	0.000548869	0.677686	0.0251046	0.640058	0.525659	0.00197955	0.14639	0.870097	0.375398	0.293682	0.747201	0.766699	0.0713164	0.264758	0.70659	0.796307	0.46848	0.47947	0.558377	0.328827	0.517113	0.84095	0.716223	0.65046	0.819798	0.604462	0.696103	0.40491	0.0772825	0.332798	0.547135	0.60471	0.669721	0.224123	0.295987	0.614912	0.16549	0.203772	0.0488129
HYPEP7	0.111833	8.64425e-09	7.10385e-09	FALSE	0.041644	0.0536591	1.28852	0.000101765	0.119407	0.130948	0.717665	0.298949	0.186081	0.108134	0.325848	0.145659	0.945619	0.719549	0.816145	0.676918	0.107035	0.448001	0.605956	0.457006	0.995794	0.800077	0.0461644	0.448843	0.62015	0.484101	0.596436	0.825164	0.141269	0.660133	0.174016	0.00448171	0.179683	0.737218	0.169844	0.699395	0.586363	0.415375	0.952254	0.106269	0.113336	0.530823
TEGLU14	0.117256	6.33679e-09	5.33034e-09	FALSE	0.126893	0.159174	1.2544	3.17134e-08	0.227033	0.208726	0.408911	0.0860968	1.93109e-05	0.166422	0.242053	0.747582	0.174843	0.0219023	0.850713	2.97023e-06	0.276464	0.625924	0.155301	0.994447	0.0286622	0.00424035	5.54889e-05	0.570924	0.462244	0.59957	0.564572	0.000984613	0.00681898	4.74742e-07	0.0918863	0.219254	0.00118409	7.53729e-05	0.28389	0.741869	0.00312258	0.0969206	0.058992	0.311157	0.629886	3.43643e-08
SCGLU7	0.117559	9.38927e-09	7.90824e-09	FALSE	0.0404648	0.0552876	1.36631	0.000215343	0.477294	0.17287	0.480946	0.125121	0.0898302	0.114288	0.318617	0.916061	0.109953	0.31047	0.821249	0.0638172	0.146741	0.437423	0.0926189	0.916322	0.0779895	0.391567	0.226136	0.792258	0.459828	0.176066	0.374445	0.389107	0.817178	0.662981	0.798995	0.343008	0.137732	0.316184	0.348987	0.470224	0.120675	0.830625	0.205089	0.360158	0.925665	0.49588
OBINH1	0.119972	7.18743e-09	6.1163e-09	FALSE	0.0722797	0.0932654	1.29034	8.81688e-05	0.0821495	0.715648	0.182654	0.435456	0.00012361	0.848859	0.520207	0.779161	0.812747	0.017231	0.935211	1.46981e-05	0.132472	0.489	0.447874	0.914076	0.844631	0.0055003	9.37878e-06	0.243521	0.669268	0.287662	0.273369	0.25038	0.764374	0.0641657	0.552484	0.27422	0.680422	0.000147948	0.0574487	0.865231	0.200251	0.16551	0.756861	0.0228094	0.26326	0.09965
PSNF2	0.122111	6.1517e-09	5.2827e-09	FALSE	0.114816	0.145415	1.26651	2.28731e-07	0.102363	0.740315	0.429861	0.196634	0.140593	0.330914	0.0393832	0.758749	0.348808	0.423742	0.224341	0.98753	0.934109	0.747215	0.0615764	0.630392	0.051753	0.44801	0.905215	0.102535	0.0540882	0.742717	0.793535	0.9243	0.0101455	0.781708	0.00658671	0.765022	0.412535	0.79695	0.282853	0.434392	0.239811	0.653183	0.0016874	0.826751	0.787915	0.922159
PSPEP8	0.130236	6.30834e-09	5.60603e-09	FALSE	0.0919194	0.117336	1.27651	3.0248e-07	0.196857	0.0765813	0.461674	0.66819	0.16729	0.664782	0.0267386	0.424231	0.274661	0.501858	0.221244	0.347434	0.750857	0.929794	0.0242306	0.8148	0.0742296	0.0731962	0.270524	0.516597	0.0794172	0.503272	0.11433	0.55999	0.0670577	0.576169	0.017191	0.299975	0.136703	0.757542	0.155913	0.268128	0.0117637	0.19366	0.0524278	0.260749	0.355885	0.498127
MEINH5	0.138212	5.50812e-09	5.06081e-09	FALSE	0.101413	0.126442	1.24681	6.67163e-07	0.901746	0.526636	0.796324	0.173415	0.0216993	0.179583	0.336683	0.0826644	0.924599	0.0155809	0.599961	0.0243886	0.503612	0.606295	0.0535513	0.972183	0.338601	0.313647	0.0184995	0.283938	0.112296	0.151311	0.370043	0.0236665	0.0286626	0.110534	0.0985324	0.230193	0.049397	0.350777	0.900106	0.47169	0.0890936	0.0418471	0.172158	0.462563	0.903059	0.00140154
HBINH1	0.145172	6.70723e-09	6.34333e-09	FALSE	0.0508471	0.0634011	1.2469	0.00116217	0.384882	0.153284	0.681664	0.348144	0.580121	0.663064	0.301268	0.578628	0.992453	0.0266035	0.19929	0.0461269	0.138957	0.98208	0.0524359	0.0736908	0.979263	0.981306	0.0372569	0.58562	0.975714	0.603213	0.89848	0.0183967	0.982574	0.00217925	0.965284	0.940376	0.549371	0.395754	0.0981597	0.215148	0.551112	0.920626	0.836417	0.773132	0.729275	0.114795
OBDOP1	0.145993	6.18716e-09	5.87143e-09	FALSE	0.0724065	0.0915442	1.26431	0.000228755	0.0666108	0.524097	0.333257	0.310934	0.00736431	0.383717	0.0824475	0.439212	0.476943	0.0269303	0.0921465	0.0193648	0.47136	0.139902	0.548273	0.276012	0.0441719	0.233831	0.00331268	0.651611	0.568071	0.308813	0.0332384	0.00713949	0.29088	0.027366	0.72055	0.0394302	0.0479108	0.204549	0.310024	0.136896	0.0258919	0.103371	0.0217912	0.113971	0.241507	0.00367954
OBNBL5	0.147511	6.04832e-09	5.77589e-09	FALSE	0.0647765	0.0837163	1.29239	8.78085e-05	0.105653	0.511331	0.279627	0.471654	0.163263	0.141573	0.0195248	0.533593	0.856722	0.0385151	0.0282588	0.00552055	0.788601	0.449431	0.546609	0.347628	0.680093	0.241882	0.0923859	0.219831	0.0770152	0.232203	0.0402685	0.101937	0.965419	0.0216527	0.819046	0.516903	0.246036	0.0412929	0.522735	0.0352615	0.214958	0.163556	0.823346	0.298722	0.891132	0.0157245
SCINH6	0.152058	4.59587e-09	4.47222e-09	FALSE	0.090847	0.113712	1.25168	5.07832e-08	0.167413	0.144697	0.542621	0.16446	0.00570126	0.0275584	0.2007	0.634101	0.498804	0.0141448	0.866944	0.0199641	0.515269	0.976983	0.215596	0.512847	0.164433	0.00351963	0.00810312	0.0985097	0.810618	0.380959	0.600704	0.00589361	0.202911	0.00441199	0.480999	0.400157	0.0170587	0.0352731	0.220746	0.714717	0.0903346	0.240638	0.125509	0.170163	0.781183	0.00504867
SCGLU8	0.176614	7.58972e-09	8.17553e-09	FALSE	0.0413041	0.0560362	1.35667	0.000161876	0.838913	0.602682	0.207869	0.774263	0.218642	0.172986	0.489724	0.861495	0.293343	0.0289887	0.313709	0.104144	0.189276	0.296073	0.0107307	0.605135	0.140876	0.170826	0.567058	0.301282	0.581489	0.167054	0.190634	0.147434	0.444234	0.0816715	0.00293854	0.503119	0.107363	0.188871	0.211042	0.426971	0.013853	0.437348	0.113369	0.581065	0.951023	0.239727
OBINH3	0.183737	4.57127e-09	5.07233e-09	FALSE	0.085632	0.108088	1.26224	4.503e-05	0.676466	0.958536	0.0339668	0.434887	0.000349854	0.571336	0.205643	0.961754	0.648044	0.0220818	0.888651	9.95008e-06	0.180909	0.744963	0.825337	0.47944	0.426285	0.0473052	4.03544e-05	0.17613	0.612073	0.297852	0.138495	0.196551	0.888065	0.120781	0.919863	0.0932135	0.877743	0.001019	0.0695493	0.954255	0.181798	0.121762	0.430787	0.318198	0.694726	0.137044
OBNBL4	0.234544	4.75928e-09	6.57393e-09	FALSE	0.0452524	0.0589752	1.30325	0.000362401	0.705262	0.931311	0.326718	0.605793	0.207987	0.576691	0.695545	0.743858	0.348034	0.796067	0.942945	0.252683	0.0922514	0.978052	0.791116	0.299864	0.408207	0.92842	0.467977	0.977944	0.979328	0.833486	0.820509	0.136956	0.351285	0.216206	0.506564	0.940932	0.709462	0.0887293	0.170529	0.905474	0.678163	0.488994	0.47015	0.419016	0.835588	0.601789
MSN6	0.238975	4.37599e-09	6.16682e-09	FALSE	0.0629234	0.0774992	1.23164	0.00150232	0.645058	0.0880576	0.228373	0.351089	0.110589	0.110226	0.092031	0.975251	0.0124755	0.0735642	0.252781	0.00264716	0.301255	0.769208	0.395276	0.890744	0.0648352	0.314666	0.00105843	0.122513	0.430193	0.331832	0.914727	0.024406	0.420127	0.0641518	0.490025	0.33953	0.111282	0.115694	0.025217	0.431591	0.0735291	0.659024	0.299479	0.360629	0.757774	0.0761566
HYPEP6	0.241753	3.67513e-09	5.24513e-09	FALSE	0.0795936	0.0952396	1.19657	3.71123e-05	0.740914	0.0161064	0.658097	0.0891536	0.0612039	0.518894	0.407313	0.320022	0.273305	0.186194	0.836943	0.00271866	0.319457	0.565489	0.166256	0.991712	0.103233	0.0242843	0.02604	0.025153	0.741614	0.0695777	0.038992	0.307736	0.407366	0.0492885	0.142363	0.00889411	0.0805168	0.0457227	0.158904	0.540949	0.163831	0.743878	0.139069	0.789511	0.992547	0.0855431
ENT5	0.249816	3.48466e-09	5.16193e-09	FALSE	0.124782	0.15675	1.25619	1.64804e-06	0.251815	0.616593	0.325439	0.437015	0.0432759	0.68133	0.626006	0.28033	0.433651	0.991507	0.451311	0.491802	0.662173	0.208883	0.913389	0.114854	0.206497	0.406358	0.125803	0.707864	0.596922	0.229141	0.0919557	0.528436	0.541632	0.859265	0.485891	0.267901	0.939717	0.0444871	0.833666	0.382088	0.255932	0.274757	0.377476	0.82317	0.662712	0.494114
OBINH2	0.320441	2.00595e-09	4.30031e-09	FALSE	0.115981	0.142435	1.22809	2.77172e-05	0.66533	0.979115	0.16058	0.395024	2.68307e-05	0.541395	0.20239	0.87814	0.76023	0.115156	0.766883	3.9439e-06	0.133482	0.927825	0.800945	0.867698	0.293067	0.03	0.00101134	0.0792181	0.77403	0.246174	0.0625121	0.0565546	0.187533	0.141566	0.35936	0.109014	0.503159	0.00937551	0.10148	0.927933	0.0919201	0.0389887	0.184144	0.257219	0.495425	0.0695438
SCGLU5	0.322682	2.29286e-09	4.98219e-09	FALSE	0.0810802	0.0994766	1.22689	1.72693e-05	0.845742	0.272662	0.853723	0.600387	0.00145982	0.397598	0.238879	0.678017	0.71431	0.883633	0.603214	0.104729	0.161672	0.970732	0.0603913	0.70013	0.856463	0.0225173	0.211979	0.184287	0.989342	0.239134	0.912179	0.0696715	0.64659	0.706952	0.857058	0.359382	0.376983	0.619886	0.398509	0.293755	0.842524	0.681641	0.928848	0.342852	0.550988	0.488476
PSPEP6	0.351367	1.9566e-09	5.1269e-09	FALSE	0.082247	0.101483	1.23388	5.88233e-06	0.234057	0.191284	0.0613715	0.945652	0.0343953	0.890854	0.223304	0.495482	0.159553	0.543626	0.801999	0.24126	0.101199	0.909866	0.244425	0.937455	0.067115	0.0554415	0.426296	0.104427	0.488346	0.127526	0.0100347	0.431076	0.142991	0.948713	0.0717364	0.684236	0.0328622	0.508325	0.0818856	0.708413	0.00891475	0.858266	0.278952	0.691897	0.552378	0.846396
DGNBL2	0.354822	1.70359e-09	4.57544e-09	FALSE	0.0961814	0.119942	1.24704	1.53154e-05	0.27609	0.419343	0.522661	0.111161	0.00868869	0.328867	0.635751	0.664082	0.741074	0.1203	0.77522	0.0271239	0.372255	0.958249	0.508529	0.781549	0.761514	0.224236	0.0243098	0.355546	0.521906	0.202126	0.582455	0.116404	0.090154	0.0715105	0.334321	0.380631	0.573923	0.0176661	0.088314	0.655592	0.339786	0.92291	0.690624	0.986679	0.992377	0.125255
SYNOR2	0.371119	1.94607e-09	5.91704e-09	FALSE	0.112154	0.137201	1.22333	2.66512e-05	0.193965	0.237248	0.0688952	0.0670778	0.105301	0.0527222	0.102046	0.536859	0.296544	0.315699	0.226835	0.59464	0.660108	0.108633	0.190228	0.860381	0.132458	0.0444284	0.472629	0.377536	0.712088	0.168761	0.601271	0.638494	0.0783177	0.574551	0.275954	0.78855	0.692677	0.602366	0.238413	0.122888	0.552149	0.810095	0.128277	0.591212	0.707302	0.938372
PSNP1	0.383927	1.29867e-09	4.39952e-09	FALSE	0.175849	0.211146	1.20073	3.55113e-07	0.134483	0.274344	0.893247	0.212008	0.0858372	0.473778	0.508149	0.210056	0.498143	0.178341	0.839828	0.294286	0.24359	0.597158	0.0560228	0.997508	0.0942467	0.0392294	0.161399	0.108924	0.303827	0.0826838	0.00432867	0.522851	0.0379686	0.497083	0.013263	0.155504	0.365484	0.175198	0.104823	0.899454	0.043571	0.961063	0.0500494	0.709982	0.770717	0.80743
NFOL2	0.396719	1.05628e-09	4.03393e-09	FALSE	0.109177	0.13294	1.21766	2.65965e-05	0.725058	0.365727	0.732761	0.585179	0.660795	0.912892	0.929079	0.564412	0.528575	0.881085	0.929715	0.12094	0.401441	0.531856	0.561852	0.931995	0.172749	0.0806499	0.159073	0.746156	0.455155	0.978958	0.565849	0.279458	0.850007	0.814042	0.341374	0.0207519	0.37743	0.0238946	0.902403	0.849294	0.859111	0.0900865	0.528342	0.508084	0.422029	0.261546
CBNBL2	0.414511	1.16789e-09	5.40801e-09	FALSE	0.0476159	0.0606217	1.27314	3.26435e-05	0.877987	0.145511	0.261063	0.231234	0.557018	0.934845	0.258553	0.882833	0.474056	0.120616	0.272389	0.00903977	0.82614	0.612688	0.830523	0.971571	0.705207	0.0460748	0.0188796	0.841085	0.713669	0.68727	0.824803	0.0935618	0.895435	0.0522177	0.886461	0.442349	0.00535835	0.097429	0.0062893	0.397453	0.503307	0.981899	0.962704	0.743224	0.991772	0.122449
SYCHO2	0.420945	1.64368e-09	8.23998e-09	FALSE	0.117834	0.141428	1.20023	0.00154543	0.141322	0.297994	0.26954	0.0515037	0.189355	0.353464	0.315362	0.202138	0.827002	0.831375	0.751651	0.948255	0.137391	0.329845	0.680287	0.897235	0.527896	0.0873168	0.815285	0.0716898	0.472865	0.2913	0.600764	0.994935	0.0149141	0.998721	0.0534914	0.423012	0.923321	0.604804	0.605936	0.819456	0.792679	0.458611	0.238944	0.754807	0.814154	0.995195
PSPEP7	0.424803	9.38874e-10	4.9513e-09	FALSE	0.0859041	0.104994	1.22222	8.06144e-06	0.163293	0.241459	0.0573726	0.37429	0.158643	0.534966	0.233391	0.689133	0.49374	0.657041	0.591354	0.623267	0.611815	0.800639	0.263463	0.903934	0.259972	0.0735372	0.0867283	0.189538	0.119794	0.0589828	0.049882	0.374695	0.0601653	0.980115	0.171219	0.838763	0.415305	0.830875	0.120942	0.613376	0.0744105	0.693491	0.181233	0.272487	0.396533	0.912017
ENT6	0.431472	7.32348e-10	4.24237e-09	FALSE	0.136038	0.160284	1.17823	6.61763e-06	0.431845	0.767449	0.478741	0.825016	0.132054	0.57384	0.461942	0.473403	0.593467	0.834814	0.540596	0.617293	0.720455	0.644181	0.573789	0.430315	0.388353	0.214463	0.303225	0.827342	0.782067	0.248272	0.196195	0.494545	0.484674	0.86079	0.95186	0.987418	0.719965	0.720544	0.980131	0.298526	0.262591	0.673327	0.72579	0.251754	0.340847	0.772261
CR	0.462517	5.20676e-10	5.5335e-09	FALSE	0.0563183	0.0699993	1.24292	0.000203002	0.316791	0.375624	0.581071	0.565997	0.374443	0.0476296	0.963267	0.15533	0.853246	0.234887	0.983528	0.459194	0.809828	0.360733	0.520875	0.120346	0.931015	0.0603758	0.411064	0.267395	0.256575	0.55379	0.623987	0.256816	0.26697	0.265895	0.216911	0.909892	0.862087	0.873376	0.662727	0.977236	0.394988	0.224964	0.57048	0.284693	0.0859322	0.567805
NFOL1	0.466656	3.17535e-10	3.79465e-09	FALSE	0.135275	0.164115	1.21319	2.24092e-05	0.868598	0.733899	0.356629	0.528965	0.737311	0.952161	0.886287	0.635524	0.616878	0.871521	0.740732	0.0961007	0.435397	0.344974	0.799386	0.98565	0.183091	0.246555	0.501747	0.736416	0.47791	0.905533	0.565153	0.455074	0.455664	0.707834	0.387049	0.105351	0.642891	0.181781	0.706628	0.863233	0.903425	0.399729	0.240877	0.749398	0.616612	0.278271
PSNP2	0.496314	4.38891e-11	4.75029e-09	FALSE	0.133037	0.158699	1.19289	9.70262e-06	0.124322	0.508675	0.849711	0.263643	0.264812	0.49225	0.34212	0.392423	0.379049	0.770874	0.802859	0.909839	0.937085	0.719237	0.111478	0.827482	0.369607	0.243689	0.404446	0.0673092	0.261097	0.300617	0.170878	0.77372	0.0545284	0.920712	0.304267	0.0377824	0.236887	0.208527	0.109577	0.494538	0.152081	0.637438	0.590662	0.384616	0.467349	0.99725
ENT3	0.500141	-1.4071e-12	3.98461e-09	FALSE	0.159019	0.190427	1.19751	2.79688e-07	0.336757	0.947128	0.461345	0.657389	0.367241	0.458486	0.193299	0.521911	0.0330405	0.959598	0.036721	0.45715	0.260734	0.358708	0.870968	0.0246206	0.0490259	0.669485	0.557226	0.382564	0.702977	0.146951	0.110491	0.919272	0.207877	0.943526	0.564075	0.249314	0.471525	0.400032	0.782327	0.0328018	0.673942	0.205975	0.177177	0.801779	0.527514	0.935774
PSNP4	0.539021	-5.3513e-10	5.46229e-09	FALSE	0.117174	0.138962	1.18595	0.00016996	0.0892407	0.257984	0.484986	0.513099	0.317803	0.480789	0.274434	0.445226	0.337728	0.836905	0.799339	0.90347	0.675144	0.678341	0.11907	0.975001	0.3037	0.610443	0.583212	0.0576508	0.556295	0.445962	0.319005	0.833598	0.104349	0.974888	0.86582	0.186322	0.696508	0.101792	0.289345	0.56404	0.421546	0.683262	0.314226	0.938341	0.981151	0.998612
SZNBL	0.541062	-4.72305e-10	4.58062e-09	FALSE	0.100863	0.123141	1.22087	0.000135938	0.683675	0.0287155	0.569376	0.313919	0.0685914	0.643203	0.31832	0.879984	0.846761	0.800602	0.223237	0.180453	0.140413	0.336375	0.17294	0.0244113	0.90098	0.511277	0.431547	0.414578	0.0265623	0.227194	0.260142	0.399171	0.00225141	0.582875	0.145794	0.151462	0.760924	0.124474	0.851264	0.372307	0.0633893	0.172199	0.936858	0.494097	0.123123	0.662316
MOL1	0.543641	-4.58123e-10	4.17951e-09	FALSE	0.113335	0.138539	1.22239	0.000113221	0.368701	0.990331	0.483414	0.728605	0.832216	0.796445	0.95158	0.939257	0.353303	0.932716	0.918011	0.210578	0.569367	0.722566	0.933214	0.683696	0.35929	0.302878	0.953336	0.654953	0.434809	0.392999	0.632639	0.478103	0.559957	0.822469	0.316942	0.304902	0.885413	0.0773527	0.780315	0.880601	0.923345	0.508507	0.528754	0.176039	0.13454	0.498936
MFOL2	0.597107	-1.0298e-09	4.18847e-09	FALSE	0.131882	0.160749	1.21889	7.28818e-05	0.786773	0.885671	0.461237	0.7989	0.936651	0.678291	0.8888	0.714977	0.250827	0.947682	0.727871	0.0895844	0.371649	0.214141	0.742289	0.938978	0.232822	0.0296513	0.49613	0.578173	0.481058	0.305713	0.808982	0.597989	0.820697	0.890251	0.261189	0.0963097	0.95202	0.0880172	0.574847	0.899356	0.890206	0.758667	0.452561	0.614204	0.374394	0.568742
MFOL1	0.60484	-9.33382e-10	3.51033e-09	FALSE	0.161607	0.192155	1.18903	3.42148e-05	0.532598	0.904422	0.38437	0.787837	0.931375	0.470681	0.877299	0.767687	0.318759	0.86048	0.890734	0.258973	0.653511	0.416194	0.107203	0.637168	0.398443	0.0229727	0.645491	0.765924	0.222027	0.787451	0.503468	0.399455	0.891557	0.896012	0.417164	0.461767	0.961391	0.0562783	0.648922	0.88474	0.983182	0.22918	0.724782	0.231705	0.200058	0.569062
MOL2	0.611567	-1.04578e-09	3.69008e-09	FALSE	0.134528	0.160387	1.19222	6.54779e-05	0.385203	0.953647	0.675413	0.904693	0.726382	0.778903	0.784172	0.986697	0.183155	0.908351	0.890231	0.327915	0.394812	0.303015	0.464719	0.558766	0.262492	0.385302	0.850894	0.820576	0.260532	0.643139	0.744901	0.557102	0.774651	0.964387	0.176519	0.17036	0.993786	0.252697	0.814888	0.924987	0.966691	0.215875	0.637905	0.326767	0.317481	0.727357
OBDOP2	0.626835	-1.90914e-09	5.90181e-09	FALSE	0.0652015	0.0777684	1.19274	0.00722367	0.198821	0.693733	0.620674	0.0785904	0.000978869	0.084531	0.571773	0.638223	0.651727	0.242663	0.821859	0.000598232	0.195317	0.942753	0.840357	0.961958	0.665846	0.0167996	0.0102485	0.955938	0.557155	0.858231	0.0365106	0.532943	0.662336	0.305904	0.969582	0.230477	0.474889	0.015152	0.283287	0.65082	0.473709	0.0967584	0.699177	0.269398	0.610518	0.185701
OPC	0.633609	-1.29007e-09	3.77845e-09	FALSE	0.131114	0.153269	1.16897	0.000124189	0.221362	0.647268	0.799957	0.422988	0.330481	0.931869	0.137496	0.633159	0.859075	0.997208	0.301559	0.77745	0.408213	0.677331	0.232063	0.157989	0.771162	0.891486	0.966136	0.456815	0.10145	0.41606	0.998827	0.795803	0.0163222	0.912424	0.267853	0.333557	0.915894	0.205253	0.966226	0.476479	0.49162	0.333207	0.917087	0.0596978	0.00682677	0.912305
OBNBL3	0.658225	-2.62578e-09	6.44167e-09	FALSE	0.0821919	0.0993918	1.20927	0.00417449	0.443611	0.255824	0.58113	0.177955	0.0436219	0.580074	0.789073	0.879916	0.461968	0.597404	0.528034	0.548218	0.946678	0.863774	0.710122	0.453211	0.341225	0.649377	0.48282	0.824476	0.279753	0.828447	0.329672	0.574724	0.931452	0.537721	0.908094	0.566795	0.446117	0.0625749	0.208599	0.523488	0.507204	0.574263	0.547275	0.845937	0.682763	0.665101
ENT4	0.681326	-2.19166e-09	4.64917e-09	FALSE	0.159192	0.189509	1.19044	1.3143e-05	0.285218	0.73843	0.672145	0.419012	0.415692	0.62143	0.188204	0.479364	0.0430893	0.936497	0.0235352	0.702413	0.918691	0.453583	0.924271	0.00644556	0.00961184	0.189366	0.678826	0.407406	0.162885	0.165571	0.321046	0.611728	0.310974	0.658863	0.692338	0.311637	0.993909	0.521095	0.947874	0.101259	0.428873	0.325159	0.0165827	0.840914	0.568103	0.772957
ENT7	0.681963	-2.38922e-09	5.04913e-09	FALSE	0.104195	0.120651	1.15794	0.000180325	0.213171	0.46603	0.390039	0.492701	0.100659	0.84978	0.0953541	0.72777	0.200614	0.522336	0.167066	0.820591	0.11609	0.2888	0.75229	0.926783	0.139636	0.654786	0.803648	0.450947	0.098688	0.201502	0.162526	0.78777	0.0464444	0.84496	0.0670767	0.880775	0.848229	0.481999	0.710984	0.315024	0.549486	0.700133	0.300898	0.245196	0.555718	0.949693
DGNBL1	0.694701	-2.69811e-09	5.29851e-09	FALSE	0.0580509	0.0714355	1.23057	0.000604354	0.0763475	0.499091	0.99729	0.387033	0.0144362	0.649045	0.43753	0.288325	0.452526	0.477636	0.718432	0.115175	0.881258	0.84326	0.177483	0.417293	0.366035	0.468945	0.00139536	0.340955	0.107545	0.818342	0.490159	0.214405	0.0255114	0.3375	0.355867	0.276506	0.506989	0.151988	0.300757	0.755923	0.226346	0.830675	0.414666	0.215845	0.0702812	0.849898
ENT2	0.726149	-2.49856e-09	4.15592e-09	FALSE	0.174373	0.204176	1.17091	8.72205e-07	0.412718	0.777713	0.633027	0.636304	0.0496537	0.280795	0.138545	0.522618	0.0230931	0.88963	0.0228707	0.485334	0.395182	0.56831	0.519377	0.158693	0.0789969	0.498089	0.656748	0.696735	0.833657	0.435191	0.138144	0.788747	0.461914	0.910123	0.396223	0.777241	0.643224	0.297806	0.904814	0.0116754	0.438902	0.765011	0.161568	0.754896	0.620379	0.969889
COP2	0.741921	-2.65328e-09	4.08651e-09	FALSE	0.10676	0.125443	1.175	0.0006879	0.121961	0.84231	0.522118	0.923364	0.600648	0.840589	0.622171	0.557752	0.633835	0.96648	0.469935	0.560091	0.361592	0.460855	0.162917	0.893979	0.466231	0.67085	0.809331	0.406073	0.572135	0.862459	0.961661	0.846054	0.923752	0.906381	0.712533	0.380745	0.520157	0.134094	0.904725	0.359347	0.559479	0.19687	0.729542	0.257083	0.239371	0.51587
HYPEP8	0.742891	-4.24266e-09	6.50432e-09	FALSE	0.0424744	0.0496821	1.16969	0.0258773	0.260056	0.00939535	0.754842	0.160915	0.0875518	0.45038	0.865701	0.64994	0.555349	0.80363	0.893911	0.631178	0.597509	0.300556	0.940079	0.787254	0.339398	0.578497	0.588212	0.788148	0.916691	0.747076	0.0201492	0.198217	0.275152	0.769618	0.355433	0.045533	0.168931	0.744628	0.331774	0.77912	0.018289	0.995657	0.534443	0.732443	0.795629	0.936242
SYNOR5	0.761556	-3.93964e-09	5.53851e-09	FALSE	0.0830543	0.098038	1.18041	0.000999436	0.149984	0.0255838	0.0977334	0.124876	0.47386	0.143903	0.1469	0.881314	0.735242	0.879138	0.79528	0.944599	0.273103	0.391629	0.724287	0.886957	0.404911	0.651013	0.930541	0.237335	0.256971	0.851865	0.807844	0.98207	0.0704791	0.983799	0.0300152	0.832355	0.813775	0.883295	0.594227	0.820249	0.08314	0.453286	0.252662	0.962423	0.8056	0.999826
SYCHO1	0.794055	-4.37728e-09	5.33443e-09	FALSE	0.0855987	0.0995572	1.16307	0.000750911	0.0703615	0.417602	0.255774	0.247966	0.0795808	0.454964	0.293892	0.554515	0.606909	0.499283	0.214993	0.849314	0.926984	0.74287	0.398017	0.75258	0.070283	0.0478571	0.847153	0.865319	0.726664	0.753067	0.308291	0.69358	0.320175	0.975357	0.160914	0.192877	0.622629	0.770458	0.795072	0.650901	0.224156	0.918535	0.018515	0.943838	0.855921	0.996997
SYNOR1	0.796765	-4.21563e-09	5.07832e-09	FALSE	0.114447	0.134224	1.17281	7.86712e-05	0.183255	0.118775	0.370252	0.0468833	0.076173	0.0362569	0.0385131	0.820612	0.55307	0.517569	0.0798477	0.767593	0.19286	0.214713	0.977414	0.756598	0.215822	0.0743434	0.956214	0.167348	0.816755	0.0335519	0.848704	0.895163	0.0798661	0.88987	0.112944	0.840809	0.771867	0.902773	0.371759	0.134904	0.350089	0.811816	0.110344	0.956913	0.706451	0.995487
ACNT2	0.801853	-3.19484e-09	3.76635e-09	FALSE	0.119063	0.143232	1.203	2.17081e-05	0.0388229	0.619487	0.892357	0.870601	0.931888	0.651925	0.647663	0.77213	0.569521	0.970416	0.377726	0.396467	0.704385	0.961976	0.408166	0.156179	0.561908	0.616444	0.709379	0.0401104	0.202423	0.486622	0.605523	0.35511	0.270288	0.779794	0.479541	0.814616	0.751758	0.695372	0.488974	0.58037	0.251993	0.168868	0.262123	0.292569	0.0861575	0.668969
CBPC	0.804859	-4.14297e-09	4.82241e-09	FALSE	0.0569902	0.0663207	1.16372	0.013911	0.704056	0.386932	0.343557	0.215308	0.0884305	0.746379	0.706802	0.978379	0.463297	0.731514	0.437037	0.448749	0.195127	0.302082	0.314289	0.997338	0.0968982	0.585204	0.493269	0.173101	0.399275	0.336668	0.531773	0.391298	0.231528	0.816443	0.943553	0.355622	0.46065	0.0652103	0.838437	0.559189	0.668185	0.800353	0.0775002	0.312095	0.511118	0.752497
PSNP3	0.826112	-3.91237e-09	4.16692e-09	FALSE	0.176746	0.203709	1.15255	3.46661e-05	0.192644	0.672409	0.966136	0.642036	0.0872088	0.672781	0.644063	0.200247	0.106902	0.936893	0.969804	0.97299	0.280285	0.394813	0.0769595	0.988062	0.0914219	0.419367	0.855572	0.057401	0.0963485	0.145803	0.131455	0.888037	0.123162	0.993318	0.0478109	0.0214154	0.460654	0.291825	0.0488636	0.829718	0.335004	0.599601	0.161664	0.953249	0.825236	0.995329
RGSZ	0.866152	-5.02414e-09	4.53286e-09	FALSE	0.0812273	0.0961296	1.18346	0.00212803	0.11183	0.588069	0.939807	0.792265	0.9311	0.758003	0.729931	0.674521	0.975351	0.997086	0.585783	0.981581	0.54694	0.943183	0.532084	0.290357	0.966968	0.63756	0.940134	0.0237797	0.0606459	0.0693295	0.518479	0.995308	0.467641	0.987965	0.362479	0.831907	0.800758	0.773468	0.933306	0.422261	0.560073	0.695307	0.549502	0.543027	0.277282	0.956828
EPEN	0.886603	-4.8156e-09	3.98425e-09	FALSE	0.213021	0.245949	1.15457	0.000219371	0.272668	0.427879	0.491018	0.966237	0.993695	0.345468	0.164689	0.0402788	0.923617	0.997019	0.115437	0.72544	0.736226	0.553051	0.260247	0.393152	0.481806	0.589976	0.999299	0.0866333	0.110592	0.42769	0.794508	0.959166	0.518981	0.999245	0.254807	0.609577	0.933076	0.912605	0.481486	0.0961771	0.414549	0.534913	0.238777	0.822186	0.496653	0.990217
MOL3	0.88974	-4.52175e-09	3.69079e-09	FALSE	0.126061	0.148371	1.17698	0.000439853	0.838019	0.980198	0.573155	0.674335	0.686146	0.905251	0.992606	0.958277	0.486929	0.96131	0.980735	0.862741	0.359492	0.448982	0.200875	0.728361	0.253751	0.743251	0.980649	0.573015	0.360688	0.433123	0.492472	0.948575	0.93574	0.983248	0.337941	0.241116	0.999335	0.552571	0.494713	0.988408	0.963711	0.730363	0.527024	0.396853	0.12224	0.883054
ACOB	0.895171	-4.4431e-09	3.54171e-09	FALSE	0.119602	0.141063	1.17944	4.04656e-05	0.157452	0.825561	0.45208	0.789952	0.96664	0.769727	0.827682	0.648081	0.933988	0.988482	0.722958	0.458481	0.88554	0.773016	0.438003	0.65049	0.972291	0.919119	0.628166	0.0326795	0.0951776	0.162327	0.789812	0.290866	0.284065	0.886785	0.612997	0.999347	0.681506	0.829319	0.836351	0.76056	0.661049	0.3628	0.630081	0.543971	0.303387	0.756294
MGL1	0.908354	-7.19195e-09	5.4047e-09	FALSE	0.0942381	0.104241	1.10614	0.110389	0.0437409	0.473378	0.0186037	0.435491	0.857135	0.705966	0.141576	0.0139895	5.65845e-05	0.990849	0.258714	0.995251	0.558481	0.792349	0.31014	0.959813	0.000158146	0.958291	0.95589	0.0219337	0.0260005	0.0081688	0.00073662	0.993696	8.81239e-05	0.984321	0.00319248	0.00564139	0.999076	0.968422	0.917628	0.378712	0.00493434	0.857146	0.00387025	0.939762	0.537079	0.994435
ACNT1	0.912125	-5.15419e-09	3.80675e-09	FALSE	0.116117	0.137457	1.18378	0.000145853	0.122082	0.97687	0.753989	0.897276	0.907565	0.891603	0.684053	0.905955	0.701631	0.987531	0.302483	0.597296	0.447294	0.91439	0.0758285	0.270948	0.592368	0.585719	0.877974	0.0220915	0.122846	0.274612	0.728794	0.793831	0.127994	0.931213	0.707152	0.930009	0.959216	0.676293	0.8674	0.412111	0.0980674	0.187635	0.251334	0.393609	0.140304	0.739827
VSMCA	0.935224	-6.33734e-09	4.18066e-09	FALSE	0.0971417	0.113496	1.16836	0.00213137	0.200025	0.999171	0.394003	0.85682	0.994772	0.115581	0.00387756	0.136068	0.532124	0.999998	1.21579e-06	0.992719	0.320719	0.276082	0.318755	0.00148847	0.182858	0.898419	0.999987	0.16251	0.205802	0.0845951	0.198351	0.998614	0.735005	0.999935	0.873621	0.955793	0.993394	0.999944	0.9906	0.000510934	0.640575	0.931351	0.160247	0.594748	0.00684812	1
DETPH	0.94076	-9.18489e-09	5.88329e-09	FALSE	0.0354012	0.0418477	1.1821	0.015867	0.207212	0.973937	0.172421	0.439929	0.231959	0.0244871	0.0757439	0.321895	0.401226	0.993347	0.0823119	0.118364	0.250506	0.479179	0.41986	0.822424	0.853503	0.317895	0.0552443	0.210293	0.0805197	0.0836721	0.516263	0.953314	0.647719	0.692624	0.212212	0.5373	0.951436	0.272553	0.529986	0.337039	0.100094	0.920912	0.997553	0.522903	0.128903	0.608868
ACTE1	0.940869	-5.79858e-09	3.71202e-09	FALSE	0.108276	0.126523	1.16852	0.000498811	0.148748	0.927818	0.449958	0.976138	0.956618	0.844162	0.97771	0.823465	0.860367	0.95036	0.864504	0.645121	0.732453	0.901742	0.566227	0.368403	0.908334	0.72139	0.604118	0.0391942	0.202482	0.202177	0.830099	0.74387	0.573211	0.974271	0.563665	0.981128	0.946868	0.852054	0.926434	0.854758	0.596943	0.544208	0.568203	0.461198	0.196738	0.8459
COP1	0.94155	-6.31995e-09	4.0308e-09	FALSE	0.122408	0.13978	1.14192	0.00379496	0.624117	0.718336	0.336036	0.408482	0.810975	0.918958	0.913046	0.755565	0.777271	0.971213	0.948414	0.650855	0.565891	0.65698	0.183848	0.954183	0.372872	0.480246	0.978123	0.37848	0.758579	0.947728	0.972742	0.931654	0.942297	0.903428	0.726106	0.407048	0.574392	0.307595	0.635951	0.938341	0.882967	0.360993	0.720742	0.187999	0.122261	0.727582
MGL2	0.946708	-8.58279e-09	5.31859e-09	FALSE	0.0950962	0.10458	1.09973	0.124927	0.0534668	0.388755	0.0476542	0.551979	0.87169	0.742469	0.0315813	0.0146408	9.59831e-07	0.935749	0.306314	0.992116	0.596064	0.94213	0.270462	0.97548	2.53972e-07	0.822998	0.871303	0.0888706	0.0183732	0.12673	0.000730429	0.958495	4.42773e-06	0.968976	0.00159532	0.00779915	0.998235	0.911279	0.814748	0.298313	0.00179161	0.70125	0.000290243	0.922924	0.453705	0.996174
SYNOR3	0.95716	-7.25721e-09	4.22265e-09	FALSE	0.158916	0.180881	1.13822	0.000179374	0.130016	0.0613377	0.345555	0.0258771	0.136672	0.0765406	0.212383	0.401678	0.868461	0.747544	0.8004	0.817723	0.207807	0.431605	0.493375	0.95934	0.507063	0.248481	0.574774	0.196451	0.659293	0.221932	0.856714	0.789497	0.189675	0.811869	0.0475044	0.930827	0.929864	0.407923	0.345227	0.740294	0.291732	0.835805	0.340779	0.980405	0.930403	0.981773
ACMB	0.966317	-6.77668e-09	3.70468e-09	FALSE	0.124519	0.142797	1.14679	0.00100067	0.126597	0.487121	0.561309	0.501496	0.983968	0.610145	0.864104	0.517715	0.442089	0.831686	0.811244	0.661534	0.975067	0.749331	0.649517	0.28212	0.317654	0.754375	0.798535	0.107155	0.13094	0.288308	0.565188	0.819504	0.123046	0.910371	0.464668	0.509607	0.928362	0.809679	0.26111	0.889716	0.225132	0.255255	0.127855	0.835987	0.199181	0.995719
SYNOR4	0.967682	-8.83856e-09	4.78337e-09	FALSE	0.139386	0.158204	1.135	0.0013221	0.152629	0.202337	0.732856	0.0682617	0.0937152	0.117626	0.204794	0.704449	0.706947	0.747839	0.487299	0.993959	0.374025	0.634898	0.751728	0.912448	0.321335	0.233187	0.880209	0.294295	0.451169	0.269485	0.486208	0.975	0.350648	0.970765	0.0474543	0.760678	0.951302	0.520684	0.49417	0.479738	0.14106	0.844035	0.348138	0.989719	0.943698	0.992305
ACTE2	0.967805	-6.78683e-09	3.66962e-09	FALSE	0.115182	0.133486	1.15891	0.000629515	0.227279	0.972789	0.414477	0.933146	0.981554	0.849866	0.891203	0.957171	0.603545	0.948498	0.855086	0.438228	0.328166	0.821295	0.0641032	0.631896	0.649612	0.580682	0.428844	0.0335001	0.0215171	0.109521	0.71361	0.780988	0.23615	0.862293	0.660455	0.985685	0.903153	0.832202	0.889263	0.808989	0.218629	0.22462	0.393257	0.465451	0.220512	0.488247
RGDG	0.98369	-9.41687e-09	4.40713e-09	FALSE	0.0696178	0.0779676	1.11994	0.0245619	0.0719453	0.986264	0.279271	0.898842	0.993941	0.847269	0.968502	0.359205	0.79885	0.945479	0.740105	0.867881	0.941737	0.723361	0.863959	0.114734	0.694729	0.514796	0.846499	0.194934	0.188995	0.369402	0.557098	0.764102	0.271844	0.376293	0.364061	0.819332	0.904815	0.367133	0.88032	0.492789	0.564924	0.925928	0.398887	0.751337	0.505644	0.858229
ACBG	0.984672	-9.3252e-09	4.3142e-09	FALSE	0.0877779	0.0968908	1.10382	0.0630261	0.316491	0.920358	0.191488	0.524855	0.97054	0.966395	0.782747	0.72925	0.390328	0.991161	0.428161	0.249684	0.999665	0.790064	0.421298	0.194255	0.3848	0.856008	0.890465	0.25282	0.463423	0.357596	0.766199	0.579607	0.391522	0.979045	0.68186	0.854172	0.999411	0.843907	0.822331	0.541937	0.144715	0.656475	0.394631	0.48574	0.337593	0.992326
MGL3	0.985296	-1.11639e-08	5.12582e-09	FALSE	0.097201	0.104331	1.07336	0.243955	0.0376973	0.6198	0.0930456	0.346851	0.965027	0.789451	0.177362	0.0065397	1.67731e-06	0.991515	0.509402	0.998318	0.568734	0.896908	0.619089	0.964467	6.9511e-07	0.913157	0.927413	0.0437189	0.134157	0.0210509	0.00249068	0.988626	0.000184209	0.998916	0.00351539	0.00490486	0.999896	0.887773	0.893648	0.577917	0.00461124	0.650298	0.000560535	0.958357	0.508292	0.9995
EPSC	0.986837	-8.19721e-09	3.69016e-09	FALSE	0.124617	0.142051	1.13991	0.0020237	0.155116	0.627086	0.258982	0.996755	0.996728	0.382602	0.202582	0.0479197	0.921615	0.99804	0.233012	0.819976	0.948291	0.538511	0.202359	0.766478	0.274691	0.727661	0.995061	0.524189	0.806744	0.34983	0.364564	0.993275	0.0379505	0.999329	0.0409268	0.146596	0.979386	0.954715	0.641391	0.101755	0.456236	0.553186	0.0955493	0.917229	0.360498	0.997655
PVM2	0.991238	-1.30831e-08	5.50747e-09	FALSE	0.0885097	0.0910973	1.02923	0.657699	0.0936806	0.533945	0.223568	0.077304	0.874304	0.788576	0.151517	0.0137509	0.000251162	0.996911	0.241557	0.991589	0.503835	0.980996	0.221634	0.882606	0.000390638	0.973529	0.977961	0.0492718	0.0504797	0.0594288	2.98357e-05	0.960532	0.00196376	0.994232	0.0502355	0.0144332	0.999677	0.985232	0.895616	0.202646	0.0105729	0.916105	0.00376262	0.929651	0.23404	0.994617
PVM1	0.991277	-1.23291e-08	5.1865e-09	FALSE	0.100495	0.104604	1.04089	0.50848	0.0698535	0.743096	0.114136	0.0339669	0.781525	0.838978	0.315044	0.00882608	0.00415239	0.986908	0.489202	0.994742	0.462286	0.958668	0.16626	0.884673	0.00273409	0.935205	0.989854	0.0822342	0.0438965	0.0785694	0.000121673	0.99481	0.000829619	0.995899	0.0984744	0.0328542	0.999726	0.994538	0.747379	0.488167	0.00993196	0.969922	0.0053651	0.946281	0.341899	0.998495
HYPEN	0.99202	-9.15659e-09	3.79966e-09	FALSE	0.0900908	0.0986015	1.09447	0.0703595	0.248982	0.315215	0.74402	0.986611	0.998594	0.354898	0.412456	0.484588	0.998903	0.998966	0.460005	0.504439	0.891693	0.773249	0.682344	0.92271	0.995932	0.862371	0.998088	0.409762	0.663815	0.195726	0.162482	0.995226	0.561321	0.984256	0.319202	0.52598	0.623182	0.999087	0.340172	0.667166	0.131976	0.977839	0.962366	0.72725	0.318486	0.9891
OEC	0.992113	-9.53597e-09	3.95012e-09	FALSE	0.112843	0.123534	1.09474	0.0579699	0.228842	0.975595	0.413583	0.754458	0.980405	0.570522	0.605856	0.880326	0.532646	0.999818	0.697259	0.996078	0.925193	0.310107	0.507005	0.426266	0.60628	0.436443	0.997234	0.0463127	0.132088	0.0779921	0.325583	0.998445	0.279771	0.860654	0.783772	0.907521	0.999998	0.997369	0.992265	0.656608	0.924816	0.932477	0.570898	0.601327	0.152858	0.922338
ENTG1	0.992478	-9.64463e-09	3.96682e-09	FALSE	0.151552	0.170006	1.12177	0.00366294	0.149951	0.798624	0.678153	0.784891	0.882064	0.836451	0.128551	0.375109	0.151095	0.992431	0.0493866	0.998043	0.307839	0.616406	0.507393	0.0180062	0.187597	0.324756	0.999988	0.353934	0.124699	0.229286	0.188902	0.86888	0.0901975	0.963903	0.0888073	0.165977	0.999786	0.999093	0.92269	0.121712	0.449363	0.963935	0.264502	0.898864	0.321369	0.989198
ENTG4	0.992985	-9.19716e-09	3.74401e-09	FALSE	0.161988	0.182813	1.12856	0.000872571	0.213504	0.903577	0.656132	0.774054	0.957722	0.762699	0.387577	0.0546144	0.0540339	0.987738	0.0673128	1	0.944065	0.865696	0.698088	0.00462381	0.00628257	0.915292	1	0.296945	0.391471	0.471834	0.100474	0.997316	0.160274	0.998053	0.23223	0.13558	0.999774	0.999818	0.887202	0.142752	0.36573	0.96287	0.0132014	0.989887	0.8691	0.997397
SCHW	0.995781	-1.40193e-08	5.32234e-09	FALSE	0.0600033	0.064644	1.07734	0.274148	0.183731	0.970324	0.107441	0.962921	0.863338	0.284341	0.644302	0.456529	0.740484	0.992801	0.148223	0.945404	0.92154	0.539482	0.207481	0.83827	0.342632	0.422648	0.998868	0.0458982	0.105598	0.116076	0.564554	0.960187	0.0138663	0.975311	0.237292	0.909243	0.965155	0.998511	0.794277	0.562031	0.294163	0.871912	0.214824	0.747999	0.275714	0.888307
ENTG2	0.997494	-1.12907e-08	4.02337e-09	FALSE	0.149219	0.165615	1.10988	0.0122837	0.193075	0.94401	0.572916	0.866122	0.9312	0.869314	0.141481	0.0534682	0.0177869	0.994798	0.0479572	0.999999	0.917761	0.441348	0.578447	0.00334948	0.00143445	0.935647	0.999993	0.268787	0.258627	0.219435	0.0824742	0.953936	0.0653182	0.996023	0.305537	0.0832694	0.99861	0.99916	0.880628	0.12446	0.292327	0.984244	0.00189347	0.932565	0.425314	0.997715
ABC	0.997691	-1.14993e-08	4.05965e-09	FALSE	0.103386	0.113106	1.09402	0.0579904	0.208123	0.836745	0.969769	0.660106	0.999933	0.271442	0.512294	0.436016	0.653152	0.999897	0.179049	0.999975	0.367862	0.459888	0.506772	2.43992e-05	0.608142	0.89032	0.999999	0.336952	0.332561	0.0524062	0.701278	0.999976	0.561822	0.999983	0.191847	0.982695	0.963096	0.999992	0.871298	0.114487	0.0386474	0.891416	0.208592	0.195439	0.00613493	0.99985
VECV	0.997778	-1.24505e-08	4.37655e-09	FALSE	0.137902	0.148939	1.08004	0.0972967	0.155216	0.641718	0.552742	0.7334	0.972566	0.305746	0.106408	0.0929726	0.123989	0.999899	0.0186631	1	0.335067	0.650987	0.716327	0.102751	0.0330017	0.905809	0.99997	0.0124444	0.215141	0.0466967	0.119115	0.998228	0.0631282	1	0.227287	0.543457	0.998894	0.989092	0.999881	0.103696	0.207511	0.952142	0.030876	0.941081	0.120259	0.999998
EPMB	0.997962	-1.13097e-08	3.93759e-09	FALSE	0.0709665	0.0761586	1.07316	0.16017	0.156684	0.502868	0.407172	0.991149	0.984831	0.28226	0.60844	0.125401	0.859997	0.993167	0.368734	0.529083	0.719531	0.379694	0.85537	0.380568	0.834281	0.921977	0.994693	0.275046	0.900005	0.176427	0.0666687	0.997559	0.520951	0.99165	0.229037	0.722823	0.83425	0.995593	0.414695	0.123733	0.400781	0.986439	0.763498	0.437055	0.0466979	0.968528
ENTG3	0.99821	-1.16243e-08	3.99053e-09	FALSE	0.147434	0.163298	1.1076	0.0115133	0.205932	0.878647	0.621193	0.863551	0.990889	0.840761	0.434701	0.111576	0.0144063	0.99927	0.0391632	1	0.719771	0.344051	0.678125	0.0151503	0.00684995	0.914455	0.999999	0.165151	0.175031	0.0677798	0.107514	0.984958	0.125021	0.999334	0.180531	0.213668	0.999347	0.994597	0.902197	0.150825	0.258065	0.998936	0.0180795	0.987941	0.674727	0.998876
VECA	0.998233	-1.06828e-08	3.66231e-09	FALSE	0.125861	0.139951	1.11195	0.0105138	0.133279	0.883864	0.837195	0.982465	0.999834	0.149636	0.00340861	0.0831091	0.306396	0.999998	7.26994e-05	1	0.927399	0.636964	0.696105	3.74639e-05	0.105546	0.930044	1	0.0482257	0.0468887	0.20545	0.123048	0.990285	0.291812	0.999958	0.703851	0.314928	0.999986	0.999973	0.982718	8.06797e-05	0.17862	0.818479	0.0720847	0.596193	0.000780374	0.999778
SATG2	0.999172	-1.36791e-08	4.34833e-09	FALSE	0.117374	0.128302	1.09311	0.0638546	0.174679	0.935233	0.729982	0.911193	0.8301	0.613618	0.976552	0.483184	0.316138	0.999481	0.698442	1	0.971609	0.760088	0.638534	0.0528723	0.171463	0.65309	0.999998	0.0211736	0.14062	0.333415	0.684205	0.992188	0.00634899	0.976017	0.207183	0.872634	0.988586	0.999777	0.998584	0.959505	0.0856835	0.851464	0.183212	0.586541	0.0473254	0.994757
ENTG6	0.999262	-1.24343e-08	3.91114e-09	FALSE	0.134645	0.148902	1.10589	0.0101452	0.227395	0.687822	0.613206	0.804233	0.989128	0.960204	0.476253	0.0928858	0.0414594	0.992823	0.045452	0.999999	0.714863	0.38033	0.654778	0.0018523	0.00668418	0.577758	0.999953	0.151612	0.42503	0.171702	0.0672605	0.968101	0.0799343	0.974748	0.0884568	0.515238	0.995805	0.998785	0.97997	0.39015	0.17174	0.987212	0.023869	0.848912	0.225269	0.996196
ENTG5	0.999531	-1.2791e-08	3.8661e-09	FALSE	0.146467	0.161052	1.09958	0.017595	0.125106	0.746664	0.56466	0.820895	0.96998	0.840129	0.350529	0.244541	0.0360095	0.984895	0.0304634	0.99995	0.987737	0.489882	0.818917	0.00344852	0.0236375	0.827734	0.999994	0.345595	0.571254	0.213276	0.209871	0.923321	0.127133	0.986626	0.333386	0.379017	0.999484	0.997184	0.943704	0.27967	0.199167	0.973562	0.0284417	0.877025	0.370942	0.994148
VLMC1	0.99972	-1.52795e-08	4.42875e-09	FALSE	0.0886092	0.0926686	1.04581	0.435229	0.331809	0.994106	0.174805	0.862341	0.996156	0.321632	0.839771	0.0643625	0.179273	0.998912	0.376669	0.999999	0.189285	0.137849	0.757708	3.80374e-05	0.0193531	0.80234	0.999987	0.084032	0.384312	0.0540483	0.254961	0.929636	0.00751946	0.994209	0.386731	0.377418	0.993498	0.999874	0.867056	0.499169	0.0216034	0.747974	0.0119003	0.042818	0.000367218	0.999593
VECC	0.999752	-1.39298e-08	3.99958e-09	FALSE	0.123274	0.131496	1.0667	0.134136	0.188199	0.738138	0.46149	0.943455	0.996631	0.16736	0.325059	0.0690282	0.111213	0.993905	0.0484584	1	0.831372	0.561127	0.642694	0.112933	0.0276104	0.897154	0.999994	0.0591292	0.492847	0.24053	0.0953873	0.979196	0.0636148	0.992813	0.594448	0.786148	0.999938	0.986988	0.987109	0.13089	0.271102	0.891797	0.0492575	0.968002	0.319959	0.999863
ENTG7	0.99991	-1.35328e-08	3.61253e-09	FALSE	0.159457	0.172742	1.08332	0.0230531	0.201348	0.749829	0.854158	0.92562	0.999826	0.909405	0.528056	0.58172	0.15505	0.991707	0.0599216	0.99978	0.948278	0.69556	0.680124	0.000852544	0.219185	0.859152	0.999966	0.330621	0.333606	0.303704	0.175646	0.974942	0.127362	0.958632	0.3545	0.563322	0.999953	0.999475	0.979543	0.199314	0.216791	0.946524	0.429335	0.778293	0.220449	0.993876
SATG1	0.999924	-1.84284e-08	4.86357e-09	FALSE	0.0643127	0.0662115	1.02952	0.627426	0.397633	0.843288	0.778431	0.896924	0.667207	0.33245	0.70951	0.896271	0.657485	0.999999	0.314419	0.989332	0.477729	0.897911	0.0433266	0.033277	0.404585	0.824006	0.999559	0.145557	0.222545	0.45972	0.626174	0.986794	0.0184274	0.992583	0.0770623	0.982072	0.928935	0.933	0.989919	0.775032	0.0596857	0.881956	0.505867	0.898596	0.212438	0.968152
PER2	0.999966	-1.50955e-08	3.78899e-09	FALSE	0.154557	0.166542	1.07755	0.0467649	0.192374	0.814373	0.695048	0.93909	0.977485	0.231038	0.0523456	0.0449936	0.216312	0.999838	0.000730117	1	0.896967	0.614023	0.571955	0.0271878	0.0311481	0.784595	0.999999	0.215712	0.231018	0.204941	0.230777	0.99235	0.125892	0.999967	0.562089	0.298401	0.999901	0.993892	0.999549	0.00689713	0.141937	0.980071	0.0700796	0.855953	0.0439578	0.999995
CHOR	0.999968	-1.30779e-08	3.26895e-09	FALSE	0.152739	0.162626	1.06473	0.0826467	0.0441813	0.890683	0.680246	0.998296	0.923263	0.892093	0.390657	0.298235	0.800507	0.999885	0.229935	0.972597	0.55025	0.543199	0.645246	0.0673386	0.603716	0.99727	0.99966	0.0833144	0.0375115	0.756836	0.199855	0.999988	0.318764	0.999994	0.0519289	0.758802	0.984501	0.99495	0.998998	0.240572	0.541001	0.940707	0.599175	0.796728	0.179167	0.999944
VLMC2	0.999995	-1.74025e-08	3.92575e-09	FALSE	0.108907	0.110973	1.01897	0.69975	0.279957	0.999391	0.508149	0.751661	0.999968	0.424223	0.642396	0.408019	0.211902	0.999995	0.174992	0.999998	0.639017	0.567508	0.494016	1.68999e-05	0.100904	0.995949	1	0.212148	0.273825	0.0588216	0.517255	0.999957	0.240588	1	0.805796	0.177968	0.999549	0.999987	0.965731	0.22145	0.033062	0.905573	0.0639668	0.138152	0.000958012	1
PER1	0.999998	-1.63046e-08	3.53022e-09	FALSE	0.164045	0.174556	1.06408	0.0856228	0.201954	0.865535	0.613463	0.818096	0.998545	0.185054	0.00632689	0.0905883	0.109911	1	0.000129978	1	0.733985	0.398058	0.557332	0.0185913	0.0100114	0.796401	1	0.0505275	0.281128	0.126894	0.11248	0.999443	0.103262	1	0.429866	0.224331	0.999944	0.999533	0.999991	0.000398275	0.164862	0.975027	0.00170032	0.745066	0.0134054	0.999999
PER3	1	-2.09884e-08	4.13121e-09	FALSE	0.0737897	0.0736751	0.998447	0.976491	0.181958	0.907127	0.834559	0.992796	0.794769	0.308973	0.0505887	0.0600599	0.501864	0.999922	0.0011842	0.99932	0.780967	0.140037	0.448584	0.123194	0.147708	0.932767	0.999783	0.672576	0.250489	0.533512	0.463845	0.999079	0.403353	0.999912	0.428257	0.57734	0.999978	0.998743	0.998304	0.0105846	0.0434432	0.941724	0.164454	0.53014	0.028573	0.999759
ENMFB	1	-2.29256e-08	3.87198e-09	FALSE	0.0934731	0.0938494	1.00403	0.926132	0.131601	0.997537	0.431396	0.977548	0.999992	0.228967	0.84993	0.000199578	0.00318301	0.996861	0.078643	1	0.901701	0.77344	0.80543	0.000329813	0.00628087	0.948028	0.999999	0.271049	0.576496	0.18668	0.175187	0.999244	0.173571	0.998157	0.786189	0.221831	0.99972	0.999309	0.587855	0.106029	0.0100315	0.99466	0.071735	0.97817	0.488028	0.999883
