# Supplementary material for: Genetic mapping of etiologic brain cell types for obesity
Source: eLife. 2020 Sep 21;9:e55851. doi: 10.7554/eLife.55851 (PMC7505664; doi:10.7554/eLife.55851)
Supplement: Figure 3—source data 3. [file elife-55851-fig3-data3.xlsx]

## Sheet: 6 - ESmu MNS BMI cell-types
gene	gene_name	DEGLU4	DEGLU5	DEINH3	HBGLU2	HBGLU5	HBINH8	HBSER5	MEGLU1	MEGLU10	MEGLU11	MEGLU2	MEGLU3	MEGLU7	MEINH2	MEINH3	TEGLU17	TEGLU19	TEGLU21	TEGLU23	TEGLU4	TEINH1	TEINH12
ENSG00000124827	GCM2	0.999353	0	0	0	0	0	0	0	0	0	0	0	0	0	0	0	0	0	0	0	0	0
ENSG00000113722	CDX1	0.995391	0	0	0	0	0	0	0	0	0	0	0	0	0.918547	0	0	0	0	0	0	0	0
ENSG00000120457	KCNJ5	0.993131	0.984839	0.723571	0	0	0	0	0.868299	0	0	0.840226	0.895859	0	0.122014	0	0	0	0	0	0	0.779906	0
ENSG00000146904	EPHA1	0.99226	0.482957	0	0	0.00624422	0	0	0	0	0	0	0	0	0	0	0.155365	0	0	0	0	0	0
ENSG00000163251	FZD5	0.990896	0	0	0	0	0	0	0	0	0	0	0	0	0	0	0	0	0	0	0	0	0.517057
ENSG00000117586	TNFSF4	0.989869	0	0	0	0	0	0	0	0	0	0	0	0	0	0	0	0	0	0	0	0	0
ENSG00000150556	LYPD6B	0.988153	0.393713	0.961396	0.238288	0	0.46067	0	0.93291	0.0117015	0.575283	0.906777	0.658244	0.0982823	0.865336	0.628441	0	0	0	0.140517	0.258828	0.924738	0.571546
ENSG00000158955	WNT9B	0.987977	0.721889	0	0	0.904308	0	0	0	0	0	0.0416667	0.313252	0	0.101261	0.577778	0.0390558	0	0	0.6564	0	0	0
ENSG00000205279	CTXN3	0.987538	0.944994	0.650593	0	0	0	0	0.0162602	0	0	0	0	0	0.0533613	0	0	0	0	0	0	0.189346	0
ENSG00000157890	MEGF11	0.987225	0.110045	0.664252	0.0563668	0.663902	0	0	0.792806	0.0268869	0	0.12735	0	0	0.875394	0.0553396	0.481208	0	0	0.581676	0	0.515195	0.961462
ENSG00000185155	MIXL1	0.984276	0	0	0	0	0	0	0	0	0	0	0	0	0	0.800808	0	0	0	0	0	0	0
ENSG00000054803	CBLN4	0.982132	0.384125	0.365942	0.766381	0.551383	0	0.309877	0.223253	0.459134	0	0.430612	0	0	0.362982	0.315774	0	0	0	0	0	0.296191	0
ENSG00000128573	FOXP2	0.977848	0.905045	0	0.00947636	0	0	0	0.811483	0.938322	0.955017	0.565829	0.932178	0.962267	0.858335	0	0	0	0	0	0	0	0
ENSG00000172403	SYNPO2	0.976415	0	0	0	0	0	0	0	0.148322	0	0	0	0	0	0	0	0	0	0	0	0	0
ENSG00000187123	LYPD6	0.975953	0	0.757966	0	0	0	0.28405	0.359123	0	0	0.714759	0.444111	0	0.0797584	0.16528	0	0	0	0.187092	0	0.916646	0.464331
ENSG00000162552	WNT4	0.974044	0	0	0	0	0	0	0	0	0	0	0	0	0	0	0.398729	0.822599	0.794879	0.652386	0.757551	0	0
ENSG00000174951	FUT1	0.973625	0	0	0	0	0	0	0	0	0	0	0	0	0	0	0	0	0	0.608132	0	0	0.670607
ENSG00000102924	CBLN1	0.971361	0	0	0.502961	0	0	0.10089	0.627368	0.341128	0.00804989	0	0	0	0	0	0	0	0.743192	0	0	0	0
ENSG00000041982	TNC	0.966473	0	0	0	0	0	0	0	0	0	0	0	0	0	0	0	0	0	0	0	0	0
ENSG00000070886	EPHA8	0.961775	0.909018	0.337147	0.113757	0	0	0	0.856494	0	0.3159	0.00508737	0.559304	0	0.320118	0.26944	0	0	0	0.278296	0.589332	0.18603	0
ENSG00000184682	NA	0.959582	0.741016	0.711643	0	0.708046	0	0	0	0	0	0	0	0	0.43241	0	0	0	0	0.865243	0	0	0
ENSG00000196542	SPTSSB	0.957892	0.782475	0.808092	0	0.900081	0	0	0.775589	0.0769231	0	0	0.65989	0.670646	0.8613	0.00654664	0	0	0	0.0568148	0.525997	0.216267	0
ENSG00000128422	KRT17	0.957304	0.527506	0	0	0	0	0.173312	0.404681	0.613345	0	0.874287	0.459619	0.37277	0	0.267155	0	0.562387	0.125866	0	0	0	0
ENSG00000148680	HTR7	0.956868	0.516178	0.930308	0.488179	0	0.112135	0	0.347512	0.330491	0.381611	0.390802	0.29621	0	0.832454	0.869123	0	0	0	0.213116	0.0534819	0.816417	0
ENSG00000233608	TWIST2	0.956048	0.598344	0	0	0	0	0	0.179868	0	0	0.878244	0.821077	0	0	0	0.913542	0	0.676633	0.981751	0	0	0
ENSG00000101327	PDYN	0.954027	0.153455	0	0.535915	0	0	0	0	0.120252	0	0	0	0	0	0	0.368114	0	0	0	0.478463	0.827751	0
ENSG00000168779	SHOX2	0.953448	0.985143	0	0.962326	0	0	0.965464	0.975751	0.992238	0.992125	0.988306	0.987054	0.863834	0.0764706	0.13806	0	0	0	0	0	0	0
ENSG00000143355	LHX9	0.953113	0.970696	0	0.235597	0	0	0	0.93176	0.994977	0.994013	0.985092	0.978744	0.993695	0	0	0	0	0	0.865221	0	0	0
ENSG00000120329	SLC25A2	0.946349	0	0.6186	0.755243	0	0	0	0	0	0.655835	0.849351	0	0	0	0	0	0	0	0.604916	0	0.652672	0.537361
ENSG00000117560	FASLG	0.944914	0.538511	0.576088	0	0.612613	0	0	0.586348	0	0	0	0.794599	0	0.147683	0.792065	0.0832811	0	0	0	0	0.13437	0
ENSG00000139292	LGR5	0.942998	0.0698819	0.466035	0.0752531	0	0	0	0.180775	0	0	0	0	0	0.849719	0.270427	0	0.036704	0	0	0.316651	0.247771	0
ENSG00000141314	RHBDL3	0.942952	0.352802	0.641528	0.543159	0.548397	0.365266	0	0.708204	0.397683	0.559071	0.493832	0.237384	0.834346	0.659699	0.61214	0.589438	0.366477	0.318947	0.300185	0.745363	0.585257	0
ENSG00000019186	CYP24A1	0.941691	0	0	0.811129	0	0	0	0.792225	0	0	0	0	0	0	0	0.660559	0	0.880309	0	0	0	0
ENSG00000141668	CBLN2	0.940268	0.902401	0.435422	0.517555	0	0	0.482111	0.457146	0.917361	0.689617	0.466365	0.476568	0.921174	0.267521	0.477976	0.400054	0	0	0	0.394258	0	0.363912
ENSG00000182601	HS3ST4	0.93912	0.526442	0.353931	0.310266	0.784925	0.38497	0.632142	0.433997	0.620457	0	0.680105	0.433414	0.773581	0.147197	0.304537	0.535059	0.258524	0.464046	0.882396	0	0	0
ENSG00000148737	TCF7L2	0.936677	0.980533	0.354109	0	0	0	0	0	0.982147	0.967062	0.936901	0	0.972427	0	0.971365	0	0	0	0	0	0	0
ENSG00000168952	STXBP6	0.936543	0.867391	0	0	0	0.473685	0	0.287336	0.494808	0.740824	0	0	0	0.437776	0.00130402	0	0	0	0	0.449085	0.714529	0
ENSG00000134215	VAV3	0.933789	0.325217	0.155231	0.140214	0	0	0.0256862	0.313465	0.515766	0.103326	0.114597	0	0	0.0341301	0	0	0	0	0	0	0	0
ENSG00000185056	C5orf47	0.933374	0	0	0	0.711629	0	0	0	0.498693	0.653982	0.620111	0	0	0.872411	0	0	0	0.776894	0.813427	0	0.644815	0
ENSG00000104941	RSPH6A	0.93254	0	0.27379	0	0	0	0	0.096218	0.601115	0.752731	0.767533	0	0.77069	0	0.893044	0	0	0.35995	0	0	0.0112862	0
ENSG00000197705	KLHL14	0.930288	0.404317	0.37395	0.0841121	0	0.950748	0	0	0	0	0.78755	0	0.293006	0.357178	0.649698	0.611737	0.976595	0	0	0	0	0
ENSG00000165621	OXGR1	0.9229	0.844518	0	0	0	0	0	0	0	0	0.902007	0	0	0.646718	0.945633	0	0	0	0.242873	0.53033	0	0
ENSG00000188991	SLC15A5	0.921379	0.794432	0.849229	0	0	0	0	0	0	0	0	0.978101	0	0	0	0	0	0	0	0	0.769394	0
ENSG00000171714	ANO5	0.91816	0	0.0703536	0.944188	0	0	0	0.173769	0.13136	0.0430839	0.690858	0.180887	0.938405	0.593328	0.664491	0	0	0	0	0.0266518	0	0
ENSG00000049130	KITLG	0.917547	0	0	0	0	0	0	0	0	0	0	0	0	0	0	0.686727	0.604947	0	0	0	0	0
ENSG00000122641	INHBA	0.914277	0	0	0	0	0	0	0	0	0	0	0	0	0	0	0	0.681467	0	0	0	0	0
ENSG00000102935	ZNF423	0.912933	0.453606	0.268061	0	0.249788	0	0.109545	0.447414	0	0	0.240685	0	0	0.32051	0.277875	0	0.0315448	0	0.102304	0	0	0
ENSG00000170293	CMTM8	0.908402	0	0	0	0	0	0	0	0	0	0	0	0	0	0	0	0	0	0	0	0	0
ENSG00000169676	DRD5	0.905564	0.950298	0.617384	0.0879576	0.530841	0	0	0.823825	0	0	0.918005	0.76075	0	0.951797	0.513963	0	0.139519	0	0.747004	0.649723	0.761949	0
ENSG00000108924	HLF	0.903469	0.198545	0.0569603	0	0.669832	0.0291356	0	0.188416	0.260957	0.551061	0	0	0.776628	0.275379	0	0	0.0133939	0.419461	0	0.5389	0	0
ENSG00000197991	AL592490	0.90037	0.079966	0.445422	0	0	0	0.567125	0	0	0	0.0473547	0	0	0.0269156	0.200339	0.587876	0	0	0.934527	0	0.385204	0.826087
ENSG00000152953	STK32B	0.899716	0.804485	0.343292	0.70203	0	0	0.819855	0.291349	0.979459	0.451264	0.594462	0	0	0.269717	0.377479	0	0	0	0	0	0.920056	0.988788
ENSG00000156966	B3GNT7	0.897655	0	0.26504	0	0.138237	0	0	0.254942	0	0	0.403604	0.704669	0	0	0	0	0	0.147403	0	0.00526652	0	0
ENSG00000124557	BTN1A1	0.89223	0.712019	0	0	0	0	0	0	0.745829	0	0.80611	0	0	0	0	0	0	0	0	0.531159	0.885879	0
ENSG00000125845	BMP2	0.888157	0.255675	0	0	0	0	0	0	0	0	0	0.835605	0	0.326969	0.231828	0	0	0.0761364	0	0	0.0196444	0
ENSG00000165555	NOXRED1	0.886115	0	0.0240476	0	0	0.943038	0	0	0	0	0.545307	0	0	0	0.342544	0.65023	0	0	0.542072	0	0	0.0692258
ENSG00000180269	GPR139	0.885579	0.493967	0.980568	0.730781	0	0	0.0306473	0.336784	0.249035	0	0.696897	0.830793	0	0.743237	0.840468	0	0	0	0	0	0.415824	0
ENSG00000188676	IDO2	0.884213	0.623489	0.704665	0.534037	0.0128131	0	0	0.790085	0.585907	0.268549	0.674828	0	0	0.204529	0	0.23306	0	0.0195346	0.00846335	0.389042	0.302081	0
ENSG00000184465	WDR27	0.883162	0.1704	0.0724058	0	0.279129	0	0	0.0796421	0.416096	0	0.0615461	0.666125	0	0.346635	0.278122	0	0	0	0.462784	0.676702	0	0
ENSG00000132911	NMUR2	0.883056	0.0346687	0.12453	0.815928	0.242386	0	0	0.0647617	0.0912545	0	0	0	0	0	0	0	0	0	0	0	0.100243	0
ENSG00000181234	TMEM132C	0.882435	0.78748	0	0.35438	0.323652	0	0.772462	0.361254	0.357397	0.426187	0.0316593	0	0	0.531281	0.0708439	0	0	0	0.158854	0	0	0
ENSG00000182575	NXPH3	0.881058	0.548939	0.090993	0.308223	0.70906	0.355881	0	0.193769	0	0	0	0	0	0	0.336141	0	0.0907476	0.193885	0	0.260148	0	0
ENSG00000085831	TTC39A	0.876125	0.726316	0.615618	0.669547	0.396941	0	0.54118	0.836232	0.389342	0.397221	0.263771	0.237342	0.594018	0.868717	0.782974	0	0	0	0	0	0.545452	0
ENSG00000135480	KRT7	0.872101	0	0	0.0817757	0	0	0.256143	0.0558137	0	0	0.0801261	0	0	0	0.5688	0	0	0	0	0.0507501	0.124414	0
ENSG00000169855	ROBO1	0.870264	0.201281	0.296193	0.61155	0	0	0.156733	0.489874	0.3267	0.318938	0.459347	0.506671	0	0.326929	0	0.0834886	0	0	0.802957	0.612159	0.443718	0.296417
ENSG00000144550	CPNE9	0.866071	0.907629	0.421774	0	0.926962	0.161893	0	0.615654	0	0.0294613	0	0.0238034	0.0644913	0.474765	0.0592104	0	0	0	0.547232	0	0	0
ENSG00000172987	HPSE2	0.864086	0	0	0	0	0	0	0	0	0	0	0	0	0	0	0	0	0	0	0	0	0
ENSG00000091664	SLC17A6	0.86339	0.944146	0	0.939951	0.479363	0	0	0.892608	0.869573	0.889501	0.836754	0.759432	0.817085	0	0	0	0	0	0	0	0	0
ENSG00000141431	ASXL3	0.861072	0.360575	0.192447	0.164032	0	0	0.294998	0.116347	0.188365	0.126689	0.31155	0	0	0	0.28051	0.306286	0.48067	0.131518	0	0.470706	0.26911	0
ENSG00000197191	CYSRT1	0.860853	0.160262	0	0	0.377627	0	0	0	0.744703	0	0.659503	0	0	0.393701	0	0.01089	0	0	0.74785	0.00857804	0	0
ENSG00000180611	MB21D2	0.859254	0.233357	0.235491	0.0736213	0.670897	0.0458358	0.0852499	0.0206574	0.00987915	0.274132	0.312949	0	0.0275401	0	0	0	0	0	0.106156	0.56252	0.389127	0
ENSG00000197181	PIWIL2	0.859155	0.494607	0	0	0.752453	0	0	0	0	0	0.0487724	0	0	0.234353	0	0.403269	0	0	0.0540183	0.132317	0.606041	0.333601
ENSG00000006747	SCIN	0.849903	0	0	0	0	0	0	0	0	0	0	0	0	0	0	0.285584	0	0	0	0	0.0900703	0
ENSG00000177519	RPRM	0.849816	0	0	0	0	0	0	0	0.401787	0	0.074549	0.0241874	0	0	0	0.917874	0	0.398337	0.287867	0	0	0
ENSG00000137573	SULF1	0.848501	0	0	0	0	0	0	0	0.153679	0	0	0	0	0	0	0.202335	0.747015	0	0.00901531	0	0	0
ENSG00000081138	CDH7	0.847928	0.65889	0.756533	0.632379	0.688624	0	0.0599036	0.480978	0.950979	0.692423	0.496437	0.353035	0.705592	0.327596	0.252529	0.414456	0	0	0	0.692396	0.383715	0
ENSG00000240891	PLCXD2	0.843467	0.416093	0.791401	0.709213	0.549743	0	0.207722	0.596818	0.672018	0.887531	0.381934	0.430347	0.576622	0.608921	0.447322	0.367809	0	0.398839	0.434731	0.405739	0.477002	0.224063
ENSG00000160716	CHRNB2	0.842401	0.532569	0.596464	0.417381	0.427522	0	0.438538	0.575872	0.352894	0.522482	0.435738	0.270704	0.284727	0.606149	0.461896	0.228983	0.0605169	0.303751	0.309641	0.423406	0.562709	0.463718
ENSG00000145685	LHFPL2	0.842149	0	0	0	0	0	0	0	0	0	0	0	0	0	0	0	0	0	0.0710561	0	0	0
ENSG00000162849	KIF26B	0.836259	0.45967	0.443065	0.312641	0.415573	0	0.455249	0.6314	0.554712	0.392309	0.403452	0.391035	0.692395	0.326961	0.432169	0	0	0.101727	0	0	0.30957	0
ENSG00000178342	KCNG2	0.835321	0	0.379642	0	0	0	0	0	0.153567	0.0579932	0.0893734	0.364367	0.232911	0.252188	0	0	0	0	0.905607	0.882004	0	0
ENSG00000115705	TPO	0.83418	0.234411	0	0.239918	0	0	0.770937	0.937261	0.4685	0.540197	0.557052	0	0	0.136907	0	0.145357	0	0	0	0.00889722	0.269744	0
ENSG00000139971	C14orf37	0.833356	0.288341	0.110164	0.372662	0.431445	0.392401	0.399482	0.246969	0	0.109081	0.00502631	0	0	0.310871	0.110373	0.0859247	0	0	0.441436	0.371918	0.194225	0.278533
ENSG00000111452	ADGRD1	0.832329	0	0	0	0	0	0	0	0	0	0	0	0	0	0	0.278973	0.205853	0.106331	0	0.552043	0	0
ENSG00000162614	NEXN	0.831277	0	0.100393	0	0	0.109888	0	0.197993	0	0.550613	0	0	0	0.171145	0	0	0	0	0	0	0	0
ENSG00000166396	SERPINB7	0.82985	0	0	0	0	0	0	0	0	0	0	0	0	0	0	0	0	0	0.335498	0	0	0
ENSG00000164093	PITX2	0.829675	0.943687	0	0	0	0	0	0.999865	0	0	0.518767	0	0	0.597149	0	0	0	0	0	0	0.429012	0
ENSG00000122584	NXPH1	0.827795	0.253045	0.133926	0.429666	0.159749	0.211685	0	0.0201069	0	0	0	0	0	0.531928	0.707165	0	0	0	0	0	0.190385	0
ENSG00000196482	ESRRG	0.826615	0.837153	0.935927	0.430354	0.892507	0.48386	0	0.384306	0	0.211602	0	0	0.702509	0.885691	0.697565	0	0	0	0	0.290073	0.838187	0
ENSG00000125207	PIWIL1	0.826492	0.754266	0	0.592636	0	0	0.894123	0	0	0	0.747907	0	0	0.155439	0	0.313295	0.554092	0	0	0.37948	0	0
ENSG00000174145	NWD2	0.82409	0	0.00634447	0.286526	0	0	0	0	0	0.199004	0	0	0	0	0.271147	0.891284	0.453783	0.566267	0.714773	0.379298	0.116966	0.149572
ENSG00000158825	CDA	0.823713	0.357121	0.34674	0.40741	0	0	0.417428	0.203922	0.126418	0.252637	0.357721	0.455852	0	0.391513	0.431565	0	0	0.0399892	0	0	0	0.22854
ENSG00000135272	MDFIC	0.823159	0	0	0	0	0	0	0	0	0	0	0	0	0	0	0	0	0	0	0	0	0
ENSG00000133454	MYO18B	0.818519	0	0.424588	0	0.694942	0	0.401762	0	0.0452134	0	0	0	0	0	0	0.0531573	0	0	0	0.044127	0	0
ENSG00000135960	EDAR	0.817935	0.0747304	0	0	0	0	0	0	0	0	0.550052	0	0	0	0	0	0	0	0	0	0	0
ENSG00000182885	ADGRG3	0.816119	0.142618	0	0	0	0	0	0	0	0	0	0	0	0	0	0	0	0	0	0.13666	0	0
ENSG00000152580	IGSF10	0.813908	0.333574	0.245426	0.168189	0.235036	0.726655	0.586878	0	0.265424	0.00646259	0.574264	0.387921	0	0.322089	0.414925	0	0	0	0	0	0.335983	0.330491
ENSG00000117707	PROX1	0.811653	0.0288906	0	0	0	0	0	0	0	0	0	0	0	0	0	0	0	0	0	0	0	0.681473
ENSG00000158470	B4GALT5	0.810751	0.562195	0.66725	0.515196	0.441688	0.347043	0.443616	0.597036	0.217541	0.200078	0.407364	0.31992	0.265353	0.591601	0.51848	0.417518	0.0823409	0.142343	0.206128	0.540838	0.611525	0.351288
ENSG00000112818	MEP1A	0.808113	0	0	0	0	0	0	0	0	0	0	0	0	0	0	0	0	0	0	0	0	0
ENSG00000092969	TGFB2	0.807365	0	0	0	0	0	0	0	0	0	0	0	0	0	0	0	0	0	0.551099	0	0	0
ENSG00000189280	GJB5	0.804088	0	0	0	0	0	0	0	0	0	0	0	0	0	0	0	0	0	0	0	0	0
ENSG00000158089	GALNT14	0.803277	0.314934	0	0	0	0	0	0.607564	0	0.263837	0.0673927	0.407873	0	0.288905	0.0422286	0.016713	0.0732881	0.417006	0.587029	0.830881	0.224876	0.807771
ENSG00000156076	WIF1	0.802239	0.0165639	0	0	0	0	0	0	0.896806	0	0	0	0	0	0	0.361133	0	0	0	0	0	0.455709
ENSG00000171094	ALK	0.801179	0.137144	0	0.823538	0.0596821	0	0.527731	0.0137433	0	0	0	0	0	0.0336441	0	0	0	0	0	0	0.735932	0.614225
ENSG00000185271	KLHL33	0.800754	0.7632	0	0.784577	0.548239	0	0	0.714328	0	0.912123	0.622382	0.870087	0.752548	0.528449	0.128222	0	0	0	0	0.398449	0.325121	0
ENSG00000140873	ADAMTS18	0.800163	0	0	0.380334	0	0.505799	0	0	0	0	0	0	0.374869	0	0	0	0	0.100054	0.327918	0.765703	0	0.943629
ENSG00000156564	LRFN2	0.799244	0.187521	0.238543	0.570192	0	0	0.293789	0.27837	0.371952	0.545039	0.544511	0.244382	0	0.472653	0.567787	0.73476	0.287953	0.30807	0.669206	0.613935	0.429788	0.663562
ENSG00000106436	MYL10	0.798739	0.741312	0	0.514347	0	0	0	0	0	0	0.962032	0	0	0	0.552087	0	0	0	0	0	0.293107	0
ENSG00000204624	DISP3	0.797689	0	0	0.561235	0.127408	0	0.344445	0.155627	0	0	0.0630672	0	0	0	0.0118658	0.533449	0	0	0.227597	0	0	0.102256
ENSG00000187773	FAM69C	0.797594	0.0600924	0	0	0	0	0	0	0	0	0	0	0	0	0	0	0	0	0	0	0	0.228265
ENSG00000186265	BTLA	0.797377	0.697258	0	0.486768	0	0	0	0	0	0	0	0	0	0	0.833202	0	0	0	0	0.0352956	0.85421	0.447107
ENSG00000119698	PPP4R4	0.797183	0.0996127	0.306972	0.175354	0.187976	0	0	0.149431	0	0.00899031	0.270679	0	0.514824	0.139904	0.176046	0.393555	0.462488	0.314015	0.424988	0.297155	0.250178	0.293536
ENSG00000166126	AMN	0.797003	0.809262	0.769124	0.150101	0.10017	0.229747	0	0.755198	0.669415	0.547346	0.775484	0.528249	0.810701	0.906403	0.937481	0.0830105	0	0	0.167268	0.876311	0.779901	0
ENSG00000166407	LMO1	0.795077	0.271759	0	0	0	0	0	0.259857	0	0.28646	0	0.189913	0	0.392337	0.600928	0.235001	0	0.367874	0.352531	0	0.0216295	0.860516
ENSG00000011083	SLC6A7	0.792905	0.846424	0.822335	0.574555	0.389911	0.308281	0.236562	0.63539	0.431399	0.56915	0.585528	0.454154	0.20878	0.816387	0.653754	0.528428	0.428351	0.581703	0.634072	0.87032	0.646168	0.262898
ENSG00000082556	OPRK1	0.792346	0	0.223587	0.324329	0	0	0.628284	0.283024	0.312825	0	0	0	0.0354278	0.3778	0.403234	0	0.314575	0	0	0	0.184938	0.363755
ENSG00000183671	GPR1	0.792299	0.0667323	0	0	0	0	0.515703	0	0	0.0363946	0	0.354394	0	0	0.107662	0.563383	0	0	0.415495	0	0.0591461	0
ENSG00000120549	KIAA1217	0.789307	0.115726	0.147585	0.0846167	0.0758339	0	0	0.108133	0	0	0	0	0	0.253197	0.021889	0	0.349634	0.401087	0.15702	0	0.0580569	0.944783
ENSG00000101958	GLRA2	0.785414	0.643498	0.365631	0.87384	0.234964	0	0.820401	0.230282	0.754485	0.575657	0.757263	0.397548	0.676642	0.103155	0.613184	0.178932	0.824079	0.0346861	0	0	0.566491	0.565968
ENSG00000140945	CDH13	0.785278	0.234709	0.251096	0.581434	0	0	0.418717	0.629213	0.334173	0.418875	0.35419	0.620134	0.317201	0.40437	0.569894	0.43037	0.488911	0.433594	0.190252	0.641439	0.44749	0
ENSG00000146242	TPBG	0.78454	0	0	0.439756	0	0.800661	0.322278	0	0.65187	0.941063	0.243881	0	0.948133	0	0	0.259785	0.675008	0	0	0.412208	0	0
ENSG00000165675	ENOX2	0.779947	0	0	0.192018	0	0	0.582463	0	0	0	0	0	0	0	0	0	0	0.00741342	0.533716	0	0.231508	0
ENSG00000173698	ADGRG2	0.778786	0.479415	0.13843	0.678105	0.0355491	0.26622	0.224449	0.438029	0.686386	0	0.438943	0.214298	0	0.015276	0.312684	0.316282	0.41477	0.0794963	0	0	0	0
ENSG00000167173	C15orf39	0.776692	0	0	0	0	0	0	0	0	0	0	0	0	0.0818562	0	0	0	0	0.591049	0	0	0
ENSG00000104059	FAM189A1	0.773635	0.140462	0.544095	0	0.185415	0	0	0.44782	0	0	0	0	0.0988865	0.329044	0	0.85029	0.512446	0.850438	0.790663	0.898481	0.547866	0.108824
ENSG00000150394	CDH8	0.770322	0.676544	0.605166	0.181914	0	0.0406742	0	0.252482	0	0	0.334335	0.0218198	0.0989549	0.325984	0.384093	0.332207	0	0.115036	0.372713	0.783288	0.603325	0.165136
ENSG00000140368	PSTPIP1	0.768807	0	0	0	0.149952	0	0	0	0.530333	0.151865	0	0	0	0	0	0.705486	0.00582252	0.561804	0.590491	0	0	0
ENSG00000115590	IL1R2	0.768377	0	0.0643549	0	0	0	0.429138	0	0	0.143311	0.32189	0.824206	0	0.078226	0	0.395487	0	0.150541	0	0	0	0.0642753
ENSG00000164951	PDP1	0.766736	0.355422	0.374638	0.545558	0.371978	0	0.413786	0.261617	0.263005	0.0470081	0	0.184969	0.532127	0.30448	0.0153223	0.4652	0.0393194	0	0.00702826	0	0.25434	0.248918
ENSG00000172680	MOS	0.764088	0	0	0	0	0	0	0	0	0	0	0	0	0	0	0	0	0.900819	0	0	0	0
ENSG00000101204	CHRNA4	0.76399	0.924198	0.916061	0.669828	0.687063	0.20277	0.369059	0.91271	0.307447	0	0.731677	0.52771	0.0757925	0.936026	0.838387	0.0830641	0.443416	0.478176	0	0.652171	0.0309625	0
ENSG00000060140	STYK1	0.761613	0.0288513	0.165393	0	0	0	0.150733	0	0	0	0	0	0	0	0	0.0319202	0	0	0.766246	0.0923299	0.218026	0.123953
ENSG00000149571	KIRREL3	0.76154	0.0832359	0	0	0.251082	0.565848	0	0	0.249781	0.363093	0	0.00371129	0.649953	0.241742	0.0831349	0.262625	0	0.550964	0	0.446252	0.340099	0
ENSG00000164484	TMEM200A	0.761212	0.212437	0.210873	0.274843	0	0	0.677935	0	0.369816	0	0.356336	0	0	0	0	0.394322	0.00280071	0.408838	0.364029	0.861807	0.358878	0.511391
ENSG00000133863	TEX15	0.761192	0.317416	0.33835	0	0	0	0	0.0964999	0	0	0.0639239	0	0	0	0	0	0.0830631	0	0	0	0	0
ENSG00000178860	MSC	0.760437	0.216648	0.0308882	0	0.0726879	0.167416	0	0.341889	0.117126	0	0.126688	0.606173	0.378064	0.0285213	0.065234	0.568062	0.47237	0.00524892	0.329254	0.167129	0	0
ENSG00000027075	PRKCH	0.758444	0.00115562	0	0	0	0	0	0	0	0	0	0	0	0	0	0	0	0	0	0	0	0
ENSG00000164694	FNDC1	0.756389	0	0.338159	0	0	0	0	0	0	0	0	0	0	0	0	0.190735	0	0	0	0	0	0
ENSG00000110628	SLC22A18	0.755987	0	0	0	0	0	0	0	0	0	0	0	0	0	0	0	0	0	0	0	0	0.384696
ENSG00000176387	HSD11B2	0.755002	0.344043	0	0	0	0	0	0	0	0	0	0	0	0	0	0	0	0	0	0	0	0.224244
ENSG00000167889	MGAT5B	0.75177	0.312891	0.318016	0.284613	0.579138	0.226853	0.035701	0.342579	0.396225	0.712663	0.282691	0.120601	0.487503	0.431415	0.381406	0.520145	0	0.0749877	0.288764	0.384557	0.319013	0.913011
ENSG00000036565	SLC18A1	0.751749	0	0	0.560954	0	0	0.411094	0	0.167892	0	0	0	0	0	0	0	0	0.410649	0.493991	0.258566	0.253704	0
ENSG00000005961	ITGA2B	0.749525	0.65858	0.276436	0.227702	0	0	0	0.119084	0.613847	0.266738	0.496447	0.348335	0.0131016	0.101841	0.44742	0.0153152	0.0517725	0.242469	0.11636	0	0.518299	0.534816
ENSG00000149201	CCDC81	0.743984	0	0	0.233372	0	0	0	0	0	0	0	0	0.747658	0	0.0942943	0	0	0	0	0	0	0
ENSG00000048052	HDAC9	0.743511	0	0	0	0	0	0	0	0	0.467259	0	0	0	0.0851278	0	0.267046	0	0.183919	0.257673	0.510962	0	0.18665
ENSG00000073803	MAP3K13	0.742977	0.194425	0.347844	0.0194217	0	0	0.271259	0.156636	0.0186279	0.0184807	0.242219	0.0384907	0.420252	0.0861619	0.292276	0	0	0	0.135278	0.0768034	0.324791	0.552354
ENSG00000165349	SLC7A3	0.742748	0.78005	0.0965026	0.842086	0	0	0.359683	0.383127	0.389827	0	0.608393	0.574132	0	0.274813	0.540758	0.176362	0.318859	0.416717	0.215406	0.00299234	0.391716	0
ENSG00000114861	FOXP1	0.742605	0	0	0	0	0	0	0	0	0	0	0.0325697	0	0	0	0	0.111692	0.348903	0.0806908	0.46389	0	0
ENSG00000111696	NT5DC3	0.737545	0.426758	0.414188	0.377385	0.209239	0	0.468475	0.408027	0.343876	0.366863	0.309827	0.274619	0.133501	0.416252	0.380163	0.421746	0.309405	0.41327	0.595332	0.657068	0.172117	0.44966
ENSG00000185760	KCNQ5	0.737216	0	0	0.111564	0.136067	0	0.26627	0.0188611	0	0	0.316948	0	0	0	0	0.651064	0.338741	0.489312	0.852827	0.835032	0	0.833734
ENSG00000147434	CHRNA6	0.735538	0.0504622	0	0	0	0	0	0.00762195	0	0	0	0	0.123141	0.56204	0	0	0	0	0	0.464621	0.156415	0
ENSG00000137204	SLC22A7	0.73515	0	0.729702	0.343548	0.490461	0	0.873614	0	0	0.310966	0.645134	0	0.864809	0	0.0795315	0	0.208406	0	0.0449661	0.217535	0	0
ENSG00000159248	GJD2	0.734321	0.450316	0.436699	0.799724	0.383762	0.234785	0.32969	0.400988	0.353605	0.0286281	0.438876	0.4409	0.12854	0.39162	0.396368	0	0	0	0	0	0.444865	0.451435
ENSG00000163534	FCRL1	0.73217	0	0	0	0	0	0	0	0	0	0	0	0	0	0	0	0	0	0	0	0	0
ENSG00000113212	PCDHB7	0.731851	0.646571	0.10682	0.0359229	0	0	0	0	0	0	0.6127	0	0	0	0	0.370284	0	0.0233225	0	0.077721	0.150119	0
ENSG00000119771	KLHL29	0.731285	0.352273	0.313837	0.233753	0.10269	0.0710112	0.108654	0.281166	0.166816	0.283452	0.263255	0.170993	0.0221257	0.356394	0.138003	0.303909	0.387847	0.214942	0.342665	0.210087	0.56855	0.200675
ENSG00000160207	HSF2BP	0.731042	0	0.00778783	0	0.150819	0	0	0.752275	0.0536532	0	0.0978766	0	0	0.482788	0.0594824	0.134897	0	0	0.130336	0	0	0.431436
ENSG00000100626	GALNT16	0.730406	0.36482	0.491566	0.528361	0.650898	0	0.0370162	0.419253	0.423047	0.237695	0.623466	0.0298823	0.566928	0.514618	0.381754	0.392679	0.390471	0.33962	0.582803	0.739525	0.368077	0
ENSG00000095397	WHRN	0.729816	0.360502	0.636165	0.283772	0.198772	0	0	0.30397	0	0	0	0	0.109211	0.421061	0.232574	0	0	0	0	0	0.41476	0
ENSG00000180205	WFDC9	0.724731	0	0	0	0	0	0	0	0	0	0	0	0	0	0	0	0	0	0	0	0	0
ENSG00000001626	CFTR	0.723428	0	0	0	0	0	0	0.103908	0	0	0.370284	0	0	0	0	0	0	0	0	0.634764	0	0.894799
ENSG00000111432	FZD10	0.72281	0.124422	0	0	0	0	0	0	0	0	0	0.0488215	0	0	0	0	0	0	0	0.0594525	0	0
ENSG00000137875	BCL2L10	0.722628	0.60002	0.661735	0	0	0	0	0	0	0	0	0	0	0	0	0	0	0	0.650822	0	0.0936968	0
ENSG00000147246	HTR2C	0.718791	0.96154	0.878061	0.883778	0.528748	0	0	0.616667	0.934431	0.449295	0.808408	0.306204	0.404945	0.876977	0.91335	0.766542	0.8146	0	0	0	0.757185	0.898843
ENSG00000144278	GALNT13	0.717189	0.455335	0.32787	0.44479	0	0.272566	0.366402	0.381067	0.420372	0.415338	0.429071	0.192441	0.538397	0.376154	0.230326	0.326097	0.256859	0	0	0.415197	0.395515	0
ENSG00000249242	TMEM150C	0.713458	0.40767	0.395974	0.354786	0.317771	0	0.52764	0.585007	0.449806	0.601974	0.391292	0.448632	0	0.437309	0.352745	0.43628	0.43234	0.45963	0.543802	0.76042	0.434207	0.177219
ENSG00000165617	DACT1	0.712373	0	0	0	0	0	0.114429	0	0	0	0	0	0	0	0	0	0	0	0	0	0	0
ENSG00000180875	GREM2	0.711878	0.620769	0.779627	0.78542	0	0	0.084148	0.552053	0.532194	0.402612	0.626191	0.419119	0.444234	0.413225	0.63286	0.603283	0.497255	0.477251	0.0491725	0.363237	0.459138	0
ENSG00000151136	BTBD11	0.708016	0.623626	0.566207	0.64948	0.669088	0.561614	0.664663	0.559949	0.382943	0.406145	0.461466	0.418849	0.40302	0.56209	0.452306	0	0.0325658	0	0	0	0.441158	0.597654
ENSG00000114529	C3orf52	0.707422	0.256776	0	0	0.931504	0	0.314802	0.0348032	0	0.492873	0.0103406	0	0.853295	0	0.613863	0	0	0	0	0.064758	0	0
ENSG00000176697	BDNF	0.707197	0.338123	0	0.305971	0.425583	0	0	0.395659	0.410722	0.566436	0.552531	0.428876	0	0	0	0.545359	0.425011	0.300025	0.773177	0.549245	0	0
ENSG00000183908	LRRC55	0.707123	0.328281	0.277883	0	0.31236	0	0.234461	0.0954373	0.427276	0.238805	0.398907	0	0	0.127187	0	0.514319	0	0	0.308552	0	0.784777	0
ENSG00000163624	CDS1	0.706162	0.594104	0.733185	0.389667	0.493655	0.53926	0.176205	0.670088	0.00839248	0.273871	0.226361	0.11323	0.396195	0.7095	0.348776	0.397219	0.300832	0.429208	0	0.894842	0.436652	0.241282
ENSG00000187871	GFRAL	0.703822	0	0.214792	0.278716	0.187476	0	0	0.25246	0	0	0	0	0	0.621978	0.715641	0	0	0	0	0	0.913919	0
ENSG00000117016	RIMS3	0.700972	0.619239	0.471391	0.491127	0	0	0.611819	0.468491	0.519681	0.47468	0.607662	0.527264	0.444821	0.449545	0.566627	0	0	0	0	0	0.448954	0.585387
ENSG00000111837	MAK	0.698439	0.282729	0	0.251214	0	0	0.242397	0	0.0397878	0	0.368737	0	0	0	0	0	0	0.172772	0	0	0.0508944	0
ENSG00000175040	CHST2	0.696634	0	0.0531816	0	0.0119269	0	0	0.0756242	0	0	0	0.010366	0	0	0	0	0	0	0.566836	0.0236272	0.227116	0
ENSG00000164038	SLC9B2	0.692204	0.226029	0.206187	0.272915	0	0	0.203952	0	0.330811	0	0.654345	0.707463	0	0	0	0	0	0.339561	0.339152	0	0	0
ENSG00000164935	DCSTAMP	0.691658	0	0.569657	0	0.807223	0	0	0	0	0	0	0.642819	0	0.154285	0	0	0	0	0.223594	0	0	0
ENSG00000138735	PDE5A	0.690413	0	0	0	0	0	0	0	0	0	0	0	0	0	0	0	0	0	0	0	0	0.95517
ENSG00000134780	DAGLA	0.690358	0	0	0	0	0	0.188798	0.00224537	0	0.245938	0	0	0.0245321	0.0148037	0.0891986	0.338397	0.286803	0.107364	0.692331	0.48984	0	0
ENSG00000107518	ATRNL1	0.68986	0.202396	0.157296	0.19214	0	0	0	0.347731	0	0	0	0	0.176718	0.261714	0	0.643792	0.357921	0.602041	0.384532	0.615621	0	0.2167
ENSG00000113805	CNTN3	0.685296	0.401385	0	0	0	0	0.441239	0.318511	0.772575	0.204692	0	0	0	0.128781	0	0.696495	0	0.539402	0	0.784132	0.111387	0
ENSG00000181450	ZNF678	0.684864	0	0	0	0	0	0	0	0.0573306	0	0.0827251	0	0.371685	0.0612424	0	0.515179	0	0.530642	0	0	0	0.122748
ENSG00000176919	C8G	0.682547	0.439686	0.0377815	0.0919977	0	0	0	0	0	0.181331	0.390505	0	0.116084	0.200306	0.141536	0	0	0.0645022	0.0783044	0.0389802	0.185508	0
ENSG00000116183	PAPPA2	0.680439	0	0.410877	0	0.996557	0	0.0569826	0.288599	0	0	0.726736	0	0	0	0	0.50058	0	0.004329	0.167873	0.684504	0	0
ENSG00000134245	WNT2B	0.678983	0.619226	0.11333	0.07978	0	0	0	0.0891339	0.429518	0	0	0	0	0.70948	0.402412	0	0.324249	0.934822	0.00934648	0	0	0
ENSG00000168646	AXIN2	0.676348	0.0866252	0	0	0	0	0	0.00689393	0.093668	0	0	0	0	0	0	0	0	0	0.0181778	0	0	0
ENSG00000184985	SORCS2	0.675667	0	0	0	0	0	0	0	0	0	0	0	0.52356	0	0	0.232964	0	0.17625	0	0.776427	0	0.840724
ENSG00000179314	WSCD1	0.672166	0	0	0	0	0	0	0	0	0	0	0	0	0	0	0	0	0	0.251549	0	0	0
ENSG00000175894	TSPEAR	0.672068	0.408711	0.16638	0.113561	0	0	0	0	0	0	0.210153	0	0.970871	0	0	0	0	0	0	0	0	0.0419169
ENSG00000153904	DDAH1	0.671298	0.0200546	0.176505	0	0	0	0	0	0.00738538	0.0243997	0	0	0	0	0.206253	0	0	0	0	0	0.374373	0.443872
ENSG00000095951	HIVEP1	0.667405	0.250504	0.0788034	0.125588	0	0	0.284973	0	0.0646589	0	0	0	0	0.259917	0.195444	0	0	0.39696	0	0.557129	0.0629167	0.354982
ENSG00000113645	WWC1	0.664126	0	0.165695	0	0.382733	0	0	0.0394349	0	0.233877	0	0.0181085	0	0	0	0.582834	0	0.188292	0.425885	0.711162	0.0527434	0
ENSG00000138315	OIT3	0.661931	0	0	0.107671	0.692405	0.958466	0	0	0.110019	0	0	0.284196	0	0	0.404174	0.0574271	0.853794	0	0.039005	0.0145228	0	0
ENSG00000171303	KCNK3	0.661819	0.439872	0.392281	0.630643	0.671403	0.320771	0.482349	0.511246	0.220548	0	0.556438	0.384476	0.189844	0.511433	0.529671	0	0	0	0	0.285916	0.403269	0.270919
ENSG00000106341	PPP1R17	0.661653	0	0	0.0832847	0	0	0	0	0.218941	0.151417	0.108549	0	0	0	0	0	0	0	0	0	0	0
ENSG00000106689	LHX2	0.660142	0.0936055	0	0	0	0	0	0.179029	0.953994	0.671169	0.814792	0.268726	0.0260223	0	0	0.764832	0	0.890035	0.705847	0	0	0
ENSG00000164176	EDIL3	0.659445	0.477118	0.11672	0.477324	0	0	0	0.100728	0.278058	0.531056	0.182938	0	0.0775401	0.1283	0.153172	0	0	0.166022	0.181198	0	0	0
ENSG00000125247	TMTC4	0.657663	0.306279	0.294121	0.681394	0	0.370422	0.497754	0.382984	0	0	0.344792	0.264169	0	0.115433	0.402656	0	0	0	0	0.0974214	0.367355	0
ENSG00000134443	GRP	0.656517	0	0.150923	0	0	0	0	0	0.835835	0.957602	0.407319	0	0	0	0	0	0	0.474533	0.566657	0.920665	0	0
ENSG00000159784	FAM131B	0.656509	0.156677	0.0419388	0	0.524036	0.0437342	0	0.214605	0	0	0.00704622	0	0	0	0	0.574617	0	0.205977	0.471423	0.313712	0.076035	0.166625
ENSG00000151948	GLT1D1	0.65154	0.508373	0.401451	0.514998	0.369602	0.103371	0.359387	0.591081	0	0.634331	0.54381	0.340235	0.386995	0.508121	0.374423	0.452164	0.228796	0.272476	0.380396	0.60448	0.593121	0.294628
ENSG00000144893	MED12L	0.651065	0.531517	0.352583	0.639256	0.0555395	0.100562	0.277906	0.503579	0.382434	0.287785	0.429903	0	0.264787	0.38735	0.325018	0.378559	0	0.0117965	0.156601	0.230646	0.575998	0.518202
ENSG00000254585	MAGEL2	0.650127	0.419896	0.709615	0.66456	0.0592486	0	0.717707	0.121616	0.635754	0.244664	0.439419	0.42351	0	0.387361	0.322803	0	0	0	0.0773313	0	0.670563	0
ENSG00000155858	LSM11	0.649477	0.536671	0.412643	0.147738	0.612192	0	0.184302	0.424969	0.01338	0	0.346307	0.159595	0.141344	0.556025	0.296524	0.450959	0	0.215068	0.877046	0.0968857	0.167475	0
ENSG00000105613	MAST1	0.644272	0.448063	0.545082	0.406205	0.442588	0.436062	0.340581	0.619973	0.43056	0.449935	0.405436	0.353113	0.397201	0.518613	0.430915	0.335643	0.392673	0.429895	0.433274	0.428646	0.444974	0.364277
ENSG00000183395	PMCH	0.643155	0.59012	0.356846	0	0.426973	0	0	0	0	0	0	0	0	0	0	0	0	0.0333333	0	0	0.668102	0
ENSG00000185052	SLC24A3	0.642199	0.655525	0.479251	0.26945	0	0.407777	0.242531	0.506989	0.400976	0.465889	0.408031	0.250967	0.135695	0.386492	0.438864	0.388634	0.370625	0.589441	0.491978	0.376516	0.440659	0.479111
ENSG00000119121	TRPM6	0.642135	0.211069	0	0	0.0738439	0	0	0	0	0	0.842712	0	0	0	0	0	0.782857	0	0	0	0	0
ENSG00000162631	NTNG1	0.641585	0.858549	0.149583	0.343289	0.406987	0	0.258579	0.585876	0.744935	0.761306	0.428537	0.364297	0	0.421013	0.245758	0.14603	0.115544	0.567299	0	0.700195	0	0.398768
ENSG00000132259	CNGA4	0.639576	0	0	0	0	0	0	0.570299	0	0	0.744538	0	0	0.567484	0.170642	0.655083	0	0.898892	0	0.790162	0	0
ENSG00000141086	CTRL	0.639492	0	0.00394654	0.0529595	0.0527457	0	0.0593935	0.127101	0.285804	0.407189	0.404359	0.146113	0.126936	0	0.0559022	0	0	0.0366342	0.159559	0	0.363763	0
ENSG00000174453	VWC2L	0.638154	0.587118	0.460158	0.584446	0.181865	0	0.418331	0.394638	0.783973	0.734524	0.746182	0.387744	0	0.603785	0.37502	0.0395035	0	0.47591	0	0	0.749498	0
ENSG00000166025	AMOTL1	0.6367	0.432229	0.0203396	0.280018	0	0	0.62921	0.380894	0.558771	0.433621	0.59275	0.446127	0.022393	0.185833	0.0506035	0	0	0	0	0	0.1542	0
ENSG00000138741	TRPC3	0.635961	0.399216	0.401502	0.277742	0	0.337315	0	0.240024	0	0.0788694	0	0.370568	0	0.644201	0.325273	0	0	0	0	0.129745	0.421833	0.177827
ENSG00000171617	ENC1	0.635385	0.295812	0.184096	0	0	0	0	0.00345788	0.518739	0.68328	0.0566047	0.14698	0.837724	0	0.148994	0.839655	0.669132	0.703072	0.84167	0.819991	0.28045	0
ENSG00000158966	CACHD1	0.635331	0.759049	0.13645	0.220517	0.0526491	0	0.193889	0.54747	0.446612	0.267102	0.470341	0.662115	0.643698	0.596438	0.400717	0	0	0	0.397736	0	0	0.0523488
ENSG00000164082	GRM2	0.635129	0	0	0	0.694253	0.415916	0	0.175674	0.565608	0	0.186923	0.186269	0	0	0	0	0	0.132443	0	0.613624	0	0
ENSG00000011677	GABRA3	0.634952	0.626803	0.650003	0.568362	0	0.0748727	0.386649	0.656316	0.535357	0.337015	0.472254	0.413	0.149756	0.620986	0.439615	0.595639	0.508338	0.496127	0	0.60087	0.588913	0.399556
ENSG00000185774	KCNIP4	0.634502	0.411757	0.462655	0.414579	0.109052	0	0.071123	0.36953	0.608664	0.468349	0.453376	0.468997	0	0.468312	0.450762	0.227987	0.0186825	0.0884199	0.0180514	0.341065	0.638511	0
ENSG00000204186	ZDBF2	0.634312	0.455995	0.477468	0.699913	0.44988	0	0.723974	0.410793	0.472047	0.273053	0.459647	0.420268	0	0.39371	0.657479	0.296704	0.108152	0.349953	0.447413	0.399496	0.625255	0
ENSG00000124098	FAM210B	0.632698	0	0.00181937	0	0.192305	0	0	0.060379	0.251224	0.00271108	0	0.0232275	0	0.205243	0	0	0	0	0	0	0.0612374	0
ENSG00000101292	PROKR2	0.632251	0.513033	0	0	0	0	0	0	0	0	0	0	0	0	0	0	0	0.047619	0.183796	0	0	0
ENSG00000157445	CACNA2D3	0.632214	0	0.035501	0	0	0.507123	0	0	0	0	0	0	0	0.0420825	0.279716	0	0	0.0252066	0.384795	0.735001	0	0.899479
ENSG00000140986	RPL3L	0.632125	0	0	0	0.271653	0	0	0.0889447	0	0	0	0.110223	0	0	0	0	0	0	0	0	0.115993	0
ENSG00000187699	C2orf88	0.631484	0	0	0	0.0197495	0	0	0	0	0	0	0	0	0	0	0.0229093	0.42781	0.133429	0	0.792095	0	0
ENSG00000181585	TMIE	0.629263	0.667214	0.423514	0.672248	0	0	0.40626	0.225345	0.825004	0.356526	0.694143	0.600813	0	0.26378	0.704656	0.044912	0	0	0	0	0.454051	0.427363
ENSG00000149575	SCN2B	0.628561	0.628432	0.801173	0.619604	0.455446	0.447335	0.42072	0.631484	0.395188	0.452773	0.489327	0.439961	0.517455	0.678466	0.632711	0.435678	0.12957	0.370046	0.45706	0.62581	0.628343	0.439906
ENSG00000087085	ACHE	0.628042	0.529932	0.543094	0.644173	0.477154	0.0573261	0.484212	0.485394	0.456116	0.40374	0.464592	0.450264	0	0.488812	0.487488	0	0	0.0186983	0.261468	0.411646	0.488258	0.475879
ENSG00000107105	ELAVL2	0.627316	0.48122	0.503161	0.674931	0.473198	0.464711	0.626126	0.464286	0.31642	0.294777	0.380059	0.404958	0.0483957	0.482929	0.532667	0.1139	0.379753	0.447872	0.463979	0.398059	0.487087	0.538451
ENSG00000188493	C19orf54	0.625308	0.00525359	0.0967806	0.0723326	0.20999	0	0.118323	0	0	0.237848	0	0	0	0.150232	0.230441	0.121345	0	0.0620671	0	0.0921802	0	0.178566
ENSG00000138604	GLCE	0.624509	0.101169	0.0999963	0.284998	0.414991	0.322938	0.158752	0	0.181892	0.181071	0.344193	0	0	0	0.0575437	0.368354	0	0.202406	0.0811026	0	0.389915	0.366251
ENSG00000165805	C12orf50	0.623678	0.797417	0.984507	0	0	0	0	0	0	0	0.584139	0	0	0	0.796457	0	0	0	0.587026	0	0	0
ENSG00000117154	IGSF21	0.623241	0	0	0	0.352225	0	0	0	0	0	0	0	0.296274	0.0577198	0	0.228605	0.512018	0.354041	0.0418752	0.729496	0	0
ENSG00000095713	CRTAC1	0.623116	0	0	0.039944	0.615928	0.263861	0.170833	0.114529	0	0	0	0	0.0548797	0.110078	0	0.61053	0.639157	0.333933	0.362033	0	0	0.668231
ENSG00000189127	ANKRD34B	0.622935	0.757074	0.876979	0.662073	0.574347	0.586305	0.447757	0.669053	0.300288	0.359826	0.336187	0.33236	0	0.900879	0.786269	0.115186	0	0	0	0.519566	0.702318	0.707243
ENSG00000130226	DPP6	0.622551	0.408233	0.457038	0.57109	0.42698	0.396296	0.427414	0.539357	0.466287	0.444003	0.470704	0.400514	0.408921	0.470524	0.459558	0.436756	0.142565	0.313772	0.394785	0.477316	0.463105	0.390115
ENSG00000170382	LRRN2	0.622041	0.0246514	0.262757	0.0686396	0.210779	0	0.170236	0.0409107	0.0959038	0	0.0201522	0	0.0552807	0	0	0.462228	0.392494	0.266426	0.672622	0.466908	0.1164	0.283278
ENSG00000100095	SEZ6L	0.621754	0.608599	0.540277	0.325811	0.550064	0	0.0784094	0.428559	0.336742	0.0653079	0.454281	0.348065	0.394017	0.38562	0.420672	0.578427	0.401429	0.437244	0.596015	0.752857	0.439434	0.450183
ENSG00000110042	DTX4	0.621427	0	0	0.0934399	0	0	0.0861298	0.0127546	0	0	0.0490502	0	0	0	0.201949	0	0	0.486437	0.282469	0.240893	0.118821	0.00056809
ENSG00000197893	NRAP	0.620024	0.431597	0.00488599	0	0	0	0	0	0	0	0	0	0	0	0	0.561658	0	0	0	0	0.0202109	0
ENSG00000081026	MAGI3	0.616751	0.51615	0.460347	0.264213	0.18764	0	0.380267	0.659298	0.385204	0.619254	0.512622	0.434407	0.239846	0.528174	0.383597	0.334267	0	0.354784	0.294688	0.353872	0.617306	0.198579
ENSG00000156599	ZDHHC5	0.614758	0.312061	0.629893	0.185418	0.222095	0	0.208235	0.310763	0.0106465	0	0	0.100692	0.361158	0.50212	0.331689	0.298316	0	0	0.16799	0.489644	0.542516	0.405776
ENSG00000251322	SHANK3	0.614329	0	0.52009	0	0	0	0	0	0.448174	0	0.58013	0	0	0.0271829	0	0.628611	0	0.0905303	0.140774	0.295191	0.596731	0
ENSG00000144283	PKP4	0.613677	0.310397	0.413713	0.192379	0.167694	0.306393	0.262724	0.313006	0.149223	0.0589659	0.252782	0	0	0.39065	0.342708	0.376009	0.278272	0.339743	0.592854	0.229563	0.518488	0.423092
ENSG00000175274	TP53I11	0.612448	0	0	0.237914	0	0.389553	0	0	0.738985	0.468363	0.258263	0.410614	0.433079	0	0.0903526	0.41893	0.454954	0	0.352165	0	0	0.909046
ENSG00000162194	LBHD1	0.610201	0	0	0.172269	0.245595	0	0.337459	0.0570991	0.0339402	0.663465	0	0	0	0.0934605	0.178187	0.0311423	0	0	0	0	0	0.315228
ENSG00000125510	OPRL1	0.610199	0.642895	0.702897	0.666987	0.455422	0.335408	0.66609	0.683709	0.673552	0.507437	0.719231	0.563081	0.448707	0.644107	0.671224	0.359398	0.322379	0.418327	0.386658	0.515744	0.556611	0.0575525
ENSG00000240720	LRRD1	0.609979	0	0	0.428087	0.0210019	0.746139	0	0.407483	0	0	0	0	0.508482	0.270084	0.0953094	0	0	0	0.215035	0.071497	0	0
ENSG00000019505	SYT13	0.608848	0.63287	0.631328	0.5083	0.590493	0	0.451075	0.410396	0.46243	0.434619	0.53468	0.397634	0.0873663	0.609606	0.651885	0.46043	0.47026	0.468873	0.454695	0.430498	0.562454	0.45223
ENSG00000100604	CHGA	0.607362	0.679517	0.770545	0.398874	0.51239	0.196735	0.344925	0.64574	0.3228	0.405694	0.439896	0.448534	0.438683	0.670193	0.542757	0.399457	0.448788	0.378825	0.302551	0.583138	0.584642	0.469173
ENSG00000094975	SUCO	0.606838	0.00252576	0.0174006	0.167704	0	0	0.350706	0.0195348	0.0151544	0	0.0894138	0	0	0	0	0.177708	0.114488	0	0	0.205567	0.0556883	0.19853
ENSG00000117114	ADGRL2	0.606079	0.545677	0.596021	0.116958	0.517909	0	0	0.671439	0	0	0.239499	0.268141	0	0.362445	0.355421	0.28122	0	0.356538	0	0.683456	0.480995	0
ENSG00000116675	DNAJC6	0.604008	0.556637	0.431706	0.584254	0.47433	0.316582	0.441659	0.391499	0.429754	0.410687	0.432985	0.379034	0.25567	0.420787	0.442313	0.378325	0.23078	0.43596	0.544658	0.373147	0.418239	0.365215
ENSG00000170054	SERPINA9	0.60177	0.439077	0.0769544	0	0.0313015	0	0	0	0.769219	0	0	0	0.777105	0	0	0	0	0	0	0	0.0281195	0
ENSG00000143858	SYT2	0.600759	0.480482	0.923803	0.530037	0.462391	0.701774	0.156666	0.913443	0	0.874388	0.321226	0.45154	0.929498	0.951879	0.43917	0	0	0	0	0.451939	0.4824	0
ENSG00000147676	MAL2	0.600567	0.644772	0.322481	0.595246	0	0	0.614769	0.364513	0.362412	0.363749	0.417677	0.602407	0.278088	0.245459	0.411485	0.614745	0.53526	0.609588	0.379505	0.87149	0.330469	0.104318
ENSG00000139364	TMEM132B	0.600428	0.0968883	0	0.0592349	0	0	0	0	0	0	0	0	0	0	0.143112	0.689418	0.50334	0.430409	0.579932	0.882538	0	0.519883
ENSG00000174106	LEMD3	0.600376	0.331768	0.491082	0.608144	0.0118015	0	0.351086	0.125594	0.221766	0.125532	0.118181	0	0.177232	0.217361	0.150883	0.449286	0.350407	0.0131494	0.310879	0.288503	0.199611	0
ENSG00000164715	LMTK2	0.59938	0.391379	0.656861	0.171612	0.378074	0	0.0235652	0.664226	0.238108	0.501127	0.308496	0.264988	0.532105	0.651346	0.361093	0.530848	0.331176	0.297717	0.423649	0.581728	0.595506	0
ENSG00000162782	TDRD5	0.599334	0.967299	0.792206	0.163567	0.438946	0	0	0.975137	0.950395	0.931241	0.944029	0.192564	0.899559	0.881358	0.0605053	0.060561	0	0	0.311132	0.109743	0.180457	0.0373722
ENSG00000077942	FBLN1	0.598248	0	0	0	0	0	0	0	0	0	0	0	0	0	0	0	0	0	0	0	0	0
ENSG00000164404	GDF9	0.596868	0	0	0	0.0386802	0	0	0	0	0	0	0	0.296123	0	0	0	0	0	0	0	0	0.267028
ENSG00000153060	TEKT5	0.596183	0.738372	0.787942	0.3516	0.0344412	0	0	0.904657	0.931749	0.908333	0.91609	0.813311	0.935082	0.913471	0.901	0.449736	0.560528	0	0	0.77734	0.536514	0
ENSG00000134775	FHOD3	0.595459	0.317338	0.418653	0.356211	0.404804	0	0	0.528305	0.295874	0.375828	0.399055	0.524396	0.304585	0.392733	0.374897	0	0.444862	0.47922	0	0.390791	0.342856	0
ENSG00000162670	BRINP3	0.595075	0.240976	0.261324	0.687989	0.0294798	0	0	0.164095	0.571635	0.53198	0.271716	0.313942	0.368171	0.3317	0.400858	0.513571	0.306914	0	0	0.402836	0.148645	0.715847
ENSG00000140836	ZFHX3	0.594899	0.371706	0.679457	0.565533	0	0	0.610539	0.354615	0.773065	0.720015	0.640556	0.402152	0.668231	0.625884	0.436194	0	0	0	0	0	0.326438	0
ENSG00000146700	SSC4D	0.592836	0	0	0.300838	0.613849	0	0	0.0306011	0.0386424	0.536782	0	0.134812	0	0	0	0.0193513	0	0	0.0957094	0	0	0.123316
ENSG00000152822	GRM1	0.592644	0.491874	0.417215	0.60831	0	0.0142697	0.119644	0.518106	0.11117	0.0459108	0.439063	0.51713	0	0.435209	0.291223	0.419247	0	0.404826	0.528477	0.211139	0.55951	0.19823
ENSG00000180773	SLC36A4	0.591232	0.554159	0.412112	0.695679	0.32673	0.404378	0.548047	0.493036	0.422219	0.390387	0.437454	0.429354	0.477873	0.472861	0.569631	0.22646	0	0.00867769	0.434222	0.344288	0.430553	0.369891
ENSG00000182938	OTOP3	0.59018	0	0	0	0	0	0	0.239001	0	0	0	0	0	0	0	0.106223	0	0	0.293464	0	0	0
ENSG00000113282	CLINT1	0.590021	0.308957	0.203328	0.278247	0.149405	0	0.455995	0.0199838	0	0	0	0	0	0.189099	0.215037	0.204036	0.0493217	0.361664	0.32889	0.123981	0.0314933	0.243363
ENSG00000166159	LRTM2	0.589085	0.385674	0.441645	0.293514	0.461334	0.164771	0	0.582052	0.332822	0.0411747	0.460183	0.426486	0.214114	0.619026	0.44479	0.27543	0	0	0	0.305791	0.420169	0.531081
ENSG00000131969	ABHD12B	0.587728	0	0	0.285758	0	0	0	0	0	0	0.7509	0	0	0	0	0	0	0	0	0	0	0
ENSG00000127578	WFIKKN1	0.5868	0.00452756	0	0	0	0	0	0	0	0	0.147938	0	0	0	0	0	0	0	0	0	0	0
ENSG00000196132	MYT1	0.58649	0.00262467	0.20301	0	0	0.14	0.28765	0.0157208	0	0	0.0899375	0	0	0.246231	0.312362	0.220051	0	0	0.264432	0	0	0
ENSG00000182218	HHIPL1	0.586341	0.496428	0	0	0	0	0	0	0.647092	0	0	0	0	0	0	0	0	0	0	0	0.811608	0
ENSG00000006283	CACNA1G	0.586168	0.431774	0.371144	0.334359	0.368485	0.504387	0	0.480846	0.412311	0.63132	0.554007	0.232087	0.385566	0.431427	0.313388	0.135318	0.427417	0.309071	0.139079	0.439848	0.192298	0.409785
ENSG00000112149	CD83	0.585301	0.815163	0.816551	0.737329	0.364705	0	0	0.89805	0.708868	0.313989	0.908705	0.721003	0.561749	0.617452	0.750651	0	0	0	0	0	0.411622	0
ENSG00000164830	OXR1	0.584977	0.500328	0.324844	0.222391	0.394427	0	0.21515	0.355982	0.360932	0.443077	0.268122	0.146916	0.11504	0.395778	0.289643	0.323381	0.167957	0.411297	0.40092	0.328431	0.327401	0.398484
ENSG00000153551	CMTM7	0.584115	0	0	0	0	0	0	0	0	0	0	0	0	0	0	0	0	0	0	0	0	0
ENSG00000143127	ITGA10	0.58305	0	0.0361503	0	0	0	0	0.0966482	0	0	0	0	0	0.527013	0.142185	0	0	0	0.164381	0	0.0218271	0
ENSG00000116106	EPHA4	0.582911	0.138563	0.302053	0.0532923	0.0096551	0	0	0.124442	0	0	0	0.00383926	0	0.2852	0	0.592162	0.0938722	0.463487	0.80778	0.521177	0	0
ENSG00000145934	TENM2	0.582403	0.752987	0.607036	0.220056	0.351461	0	0	0.555549	0.620878	0.516782	0.537601	0.571795	0.292544	0.594129	0.591229	0.374916	0.272919	0.58131	0.627222	0.696061	0.525295	0.398437
ENSG00000066032	CTNNA2	0.582184	0.400678	0.31856	0.273225	0.222739	0.101258	0.310151	0.137068	0.164286	0.12373	0.274001	0.201085	0.29426	0.347273	0.314511	0.244579	0	0.394955	0.238422	0.50859	0.358632	0.0736715
ENSG00000233932	CTXN2	0.581334	0.651476	0.57939	0.546704	0	0	0.44881	0.631322	0.658959	0.414179	0.731335	0.631186	0	0.47334	0.689849	0.366725	0.428627	0.402265	0.465484	0	0.478444	0.445838
ENSG00000182240	BACE2	0.580627	0	0	0	0	0	0	0	0	0	0	0	0	0	0	0	0	0	0.19558	0	0	0
ENSG00000144285	SCN1A	0.580575	0.721213	0.820432	0.503511	0.586851	0.418286	0.129577	0.808395	0.336537	0.611454	0.414495	0.395001	0.849317	0.849457	0.606033	0.36544	0	0.0563017	0.225091	0.789366	0.609898	0.664234
ENSG00000145247	OCIAD2	0.580008	0.117296	0.0565404	0	0.345214	0	0.192217	0.108258	0.242332	0.610413	0.306286	0.12484	0.182911	0.0353876	0.148788	0.62123	0.602065	0.39131	0.613385	0.726426	0.0431706	0.148427
ENSG00000026508	CD44	0.579998	0	0	0	0	0	0	0	0	0.0510459	0	0	0	0	0	0	0	0	0	0	0	0
ENSG00000139182	CLSTN3	0.579387	0.574959	0.625225	0.466091	0.463027	0.30482	0.387841	0.567136	0.450118	0.45008	0.468859	0.441914	0.441667	0.61832	0.564111	0.43287	0.37017	0.288659	0.422424	0.612695	0.471424	0.603067
ENSG00000186280	KDM4D	0.578997	0	0	0.591144	0	0	0.140451	0	0.601537	0.187219	0	0	0	0	0	0	0	0	0	0.357078	0.54621	0.23062
ENSG00000155886	SLC24A2	0.578079	0.532766	0.589252	0.294745	0.612235	0.178387	0.218896	0.385329	0	0	0	0.0481188	0	0.623898	0.359999	0.540243	0	0	0.594729	0.610571	0.266954	0.360707
ENSG00000006740	ARHGAP44	0.577289	0.423253	0.607162	0.495539	0.613831	0.459515	0.456862	0.554093	0.405256	0.332364	0.407256	0.375035	0.353053	0.675573	0.420334	0.548897	0.278172	0.464446	0.422915	0.386505	0.43683	0.148384
ENSG00000159840	ZYX	0.576777	0	0.049916	0	0.59516	0.29338	0	0.0258667	0	0	0	0	0	0.147757	0	0.00296473	0	0	0.0161541	0	0	0
ENSG00000165209	STRBP	0.575874	0.419018	0.420159	0.346454	0.424881	0.299544	0.0852697	0.413007	0.25226	0.406742	0.204432	0.15709	0.369439	0.424649	0.361185	0.458072	0.338563	0.39864	0.342548	0.610825	0.408293	0.412586
ENSG00000143318	CASQ1	0.575726	0	0	0	0	0	0	0	0	0	0	0	0	0	0	0	0	0	0	0	0	0
ENSG00000255508	AP002990	0.574691	0.123488	0.0815589	0	0.12736	0	0	0.502161	0	0.135475	0.370338	0.523794	0.164626	0.438257	0.122362	0.216875	0	0	0	0.0338334	0.182611	0.0859844
ENSG00000169181	GSG1L	0.574487	0.314569	0.172283	0.24666	0.734329	0	0	0	0.310812	0.678555	0	0	0.140062	0.274797	0.316906	0.694623	0	0.354836	0	0.370536	0.0577074	0
ENSG00000135824	RGS8	0.572695	0.668152	0.77206	0.374562	0.510834	0.199214	0	0.61521	0.409165	0.429113	0.504629	0.461795	0.438642	0.628244	0.536033	0	0	0	0.272752	0	0.723479	0.929728
ENSG00000215045	GRID2IP	0.572502	0	0	0.658473	0	0.780787	0	0	0	0	0	0	0	0	0	0	0	0	0	0	0	0.349364
ENSG00000163788	SNRK	0.571226	0.212058	0.40526	0.366464	0.514466	0.180173	0.212715	0.492814	0	0.00784276	0.173625	0	0.0667781	0.375045	0.295706	0	0	0	0	0.247384	0.348266	0.231458
ENSG00000177875	CCDC184	0.569385	0.641704	0.772049	0.420545	0.562948	0.01	0.438117	0.646994	0.432836	0.44276	0.478771	0.434009	0	0.834802	0.639753	0	0	0	0	0	0.610112	0.463983
ENSG00000100234	TIMP3	0.568375	0	0	0	0	0	0	0	0	0	0	0	0	0	0	0	0	0	0	0	0	0
ENSG00000255112	CHMP1B	0.568152	0.39395	0.3836	0.658389	0.0373434	0.322089	0.397732	0.358923	0.333124	0.301873	0.388132	0.277184	0.324604	0.356149	0.399496	0.375371	0.136155	0.397075	0.355025	0.170418	0.403111	0.476282
ENSG00000159173	TNNI1	0.567212	0	0	0	0	0	0	0	0	0	0	0	0	0	0	0	0	0	0	0	0	0
ENSG00000166862	CACNG2	0.566408	0.369049	0.585626	0.447322	0.249426	0	0.417907	0.594758	0.31367	0.318974	0.436631	0.448989	0.357679	0.599473	0.555268	0.0803534	0.0344332	0.336814	0.444383	0.193862	0.467898	0.622235
ENSG00000167680	SEMA6B	0.565824	0.549291	0.565867	0.415557	0.389975	0.481163	0.217219	0.43006	0.389617	0.341825	0.476014	0.322513	0.284814	0.430104	0.51707	0.560646	0.412765	0.511204	0.6205	0.651294	0.421828	0.38254
ENSG00000161682	FAM171A2	0.565086	0.269601	0.392042	0.500661	0.260529	0	0.313406	0.288864	0.122755	0.14063	0.35708	0.0281546	0.0799465	0.26366	0.365728	0.579622	0.411591	0.433793	0.565319	0.693543	0.23169	0.514491
ENSG00000205002	AARD	0.564791	0.372534	0.402843	0.367122	0.270293	0	0	0.397056	0.467693	0.614773	0.438328	0.409239	0	0.410641	0.120422	0.0284002	0.286758	0.307303	0.00316456	0	0.242301	0
ENSG00000136643	RPS6KC1	0.563382	0.289591	0.266099	0.281204	0.128716	0	0.033661	0.239102	0.292798	0.0930444	0.3256	0.469609	0.0280749	0.283998	0.476879	0.440739	0.191103	0.337793	0.254258	0.293003	0.309262	0.186115
ENSG00000188167	TMPPE	0.561682	0.0130329	0.450478	0.275485	0	0.464939	0.395943	0.586632	0.121914	0	0.307427	0	0	0.276375	0.426096	0.0123002	0	0.0392857	0.187766	0.280771	0.277593	0.352537
ENSG00000073150	PANX2	0.56149	0.530874	0.723368	0.653472	0.719895	0.611569	0.339327	0.64818	0.113939	0.0681076	0.151981	0.397842	0.306434	0.722512	0.48677	0.394597	0.120608	0.376269	0.504145	0.440505	0.455006	0.423452
ENSG00000185477	GPRIN3	0.561077	0.465703	0.520073	0.589041	0.336073	0.129551	0	0.583934	0.157989	0	0.318741	0.047596	0	0.390309	0.749894	0	0.133918	0.279723	0.532689	0.74685	0.862516	0
ENSG00000140323	DISP2	0.560099	0.636555	0.650125	0.588205	0.468303	0.372933	0.464465	0.64421	0.560258	0.476438	0.588291	0.480681	0.475876	0.625743	0.66068	0.433168	0.434225	0.421975	0.468513	0.523362	0.536678	0.475218
ENSG00000142046	TMEM91	0.559783	0.637426	0.557361	0.542403	0.447892	0	0.0382789	0.603664	0.738592	0.579346	0.705534	0.562504	0.632787	0.580821	0.682876	0.291905	0.311809	0.471987	0	0.447969	0.574518	0
ENSG00000198722	UNC13B	0.55826	0	0	0	0	0	0	0	0.229045	0.60646	0	0	0.281857	0	0	0.835078	0.453447	0.398271	0.424744	0.563736	0	0
ENSG00000100285	NEFH	0.55736	0.471704	0.762187	0.441926	0.683619	0.463286	0.442782	0.682161	0.0199501	0.435745	0.33981	0	0.462342	0.80723	0.416124	0.162479	0	0.066952	0.388733	0.565803	0.55019	0.376634
ENSG00000175745	NR2F1	0.557155	0	0	0	0	0	0	0	0	0	0.0117437	0	0	0	0	0.577435	0.434318	0.360055	0.486145	0	0	0.355548
ENSG00000163449	TMEM169	0.556178	0.533507	0.390825	0.0977075	0.247639	0	0	0.332405	0.121472	0.427432	0.166693	0.263252	0.0702372	0.445327	0.370011	0.312093	0.270634	0.292965	0.107709	0.360654	0.418183	0.374241
ENSG00000114948	ADAM23	0.555407	0.31885	0.575832	0.607842	0.329534	0.384612	0.418796	0.580119	0.0534721	0.34186	0.182784	0.06226	0.576918	0.516746	0.248601	0.360815	0.0942171	0.0435434	0.367386	0.549074	0.425367	0
ENSG00000145888	GLRA1	0.555314	0.459949	0.392019	0.808923	0.559904	0.574491	0.458573	0.617759	0	0.307335	0.483366	0.436433	0.393919	0.66949	0.485719	0	0	0	0	0	0.157125	0
ENSG00000168538	TRAPPC11	0.55519	0.159457	0.539188	0.167124	0.251434	0	0.470997	0.34071	0.146191	0.0147173	0.273076	0	0.2028	0.291206	0.403975	0.319425	0.124451	0.381452	0.31731	0.332109	0.158419	0.133848
ENSG00000154096	THY1	0.554826	0.562344	0.593032	0.42035	0.48413	0.326062	0.30836	0.625116	0.44559	0.503981	0.45487	0.408206	0.578616	0.613376	0.494378	0.448133	0.315707	0.385444	0.508445	0.60247	0.475743	0.458331
ENSG00000118242	MREG	0.554824	0.334334	0.422936	0.279088	0.918231	0.373894	0.466005	0.319664	0.460637	0.537862	0.299964	0.307817	0	0.520486	0	0	0.0438532	0	0.0349205	0	0.196309	0
ENSG00000198477	NA	0.55452	0.307293	0.482888	0.573295	0.170403	0	0.370661	0.467317	0.378987	0.0962587	0.215496	0.263875	0.186533	0.342389	0.521233	0.116305	0	0.100637	0.335288	0.125595	0.391758	0
ENSG00000138376	BARD1	0.554414	0	0	0.245981	0	0	0	0.0782579	0	0	0	0	0	0.130543	0	0	0	0	0	0	0	0
ENSG00000109762	SNX25	0.553632	0.435985	0.442029	0.141307	0.408826	0	0.335891	0.321244	0.223342	0.395611	0.351337	0.259056	0.304953	0.407201	0.385204	0.18751	0	0	0.174609	0.648271	0.422114	0.293616
ENSG00000165868	HSPA12A	0.553588	0.455738	0.587868	0.246847	0.42731	0.434042	0.170234	0.554432	0.398699	0.456802	0.416167	0.149274	0.426635	0.590158	0.431527	0.579613	0.42551	0.443784	0.629145	0.610742	0.442294	0.397043
ENSG00000101680	LAMA1	0.553188	0.595342	0	0	0.975003	0	0	0	0	0	0	0	0	0	0	0	0	0	0	0	0.0830404	0
ENSG00000117632	STMN1	0.553068	0.348974	0.245682	0	0.34796	0	0	0	0	0	0	0	0	0	0	0	0	0	0	0	0.409976	0.50164
ENSG00000070770	CSNK2A2	0.552259	0	0.289705	0.218172	0.249525	0	0.21376	0.0448029	0	0.123537	0	0	0	0.295485	0.0402685	0.29647	0	0.038875	0.340154	0.296847	0.289713	0.236563
ENSG00000011347	SYT7	0.55222	0.31448	0.389749	0.296224	0.478819	0.279554	0	0.417952	0.00700173	0.43612	0.287842	0.223716	0.47747	0.489153	0.376309	0.62133	0.411922	0.475889	0.577185	0.661147	0.315535	0
ENSG00000178662	CSRNP3	0.55141	0.595189	0.542512	0.471883	0.218067	0	0.395859	0.50463	0.437483	0.448291	0.473091	0.499162	0.424811	0.581196	0.458668	0.266665	0.378415	0.372757	0.379066	0.433462	0.558048	0.439785
ENSG00000174738	NR1D2	0.551353	0.574096	0.619047	0.433618	0	0.381958	0.218878	0.462878	0.215502	0.502966	0.216641	0.0129255	0.587328	0.562421	0.317205	0.0589267	0.0373074	0.104573	0	0.292276	0.410246	0.135223
ENSG00000182256	GABRG3	0.551174	0.348836	0.249191	0.423812	0	0	0	0.390203	0.378643	0	0.362939	0.218312	0	0.169567	0.372646	0.160667	0.448567	0.356619	0	0.612331	0.356557	0.148467
ENSG00000163814	CDCP1	0.550036	0	0	0	0	0	0	0	0.319344	0.644185	0	0	0.89861	0	0	0	0	0.676246	0	0.697675	0	0
ENSG00000146373	RNF217	0.549933	0.0148515	0.231933	0.355416	0	0	0.612213	0.130801	0.00383656	0	0.142155	0	0	0.0145988	0	0.514861	0.238031	0.456316	0.0282602	0.485915	0.260573	0.344179
ENSG00000055813	CCDC85A	0.548855	0.411182	0.360453	0.378435	0	0.344957	0.428205	0.392246	0.40189	0.456963	0.195292	0.196233	0.355993	0.334114	0.238641	0.191391	0	0.307551	0.345022	0.391979	0.320936	0.0644839
ENSG00000143603	KCNN3	0.548388	0.0720689	0.40402	0	0	0	0.616446	0	0	0	0.19605	0	0	0	0	0.0342369	0.0838738	0.0515693	0.00250221	0	0.326753	0
ENSG00000152932	RAB3C	0.547128	0.535951	0.542231	0.373909	0	0.414257	0.357515	0.366556	0.430187	0.467948	0.308845	0.282932	0.313624	0.595707	0.598576	0.416226	0.383722	0.514992	0.391719	0.58254	0.503652	0.576568
ENSG00000017373	NA	0.546966	0.153314	0.414274	0.246243	0.252016	0.155908	0.215116	0.214588	0	0	0	0	0.096992	0.331551	0.267892	0.329797	0.196999	0.336772	0.332184	0.331315	0.422148	0.332711
ENSG00000196935	SRGAP1	0.544811	0.271804	0.19601	0	0.326977	0	0.501402	0.0856155	0	0.3083	0.0156426	0	0	0.215276	0	0	0	0	0	0	0.317016	0.339924
ENSG00000107282	APBA1	0.544797	0.37159	0.196101	0	0.566186	0	0.230318	0.422442	0.398698	0.66637	0.285288	0.0863006	0.240895	0.369402	0.296816	0.174389	0.11837	0.362709	0.331147	0.0954386	0.239595	0.579378
ENSG00000160191	PDE9A	0.544665	0.203052	0.243341	0	0.418973	0.187589	0.0817878	0	0	0	0	0	0	0.104789	0	0	0	0	0	0.268716	0.16243	0
ENSG00000135436	FAM186B	0.543044	0.0767717	0.278339	0	0.655084	0	0.167053	0.161459	0.563014	0.253319	0	0.156049	0	0.156727	0.809016	0.110624	0	0.66956	0	0.168319	0.569658	0.0910972
ENSG00000164659	KIAA1324L	0.541675	0.355036	0.253423	0.589481	0	0	0.325601	0.33069	0.357919	0.371557	0.179935	0	0.302112	0.056091	0.264637	0	0	0	0	0	0.256486	0
ENSG00000152910	CNTNAP4	0.541441	0.549874	0.638781	0.570066	0.528274	0.525128	0.0286999	0.41567	0.391879	0.37895	0.584228	0.393838	0	0.423503	0.593584	0	0	0.366337	0	0	0.528515	0.882317
ENSG00000139190	VAMP1	0.54124	0.640679	0.829874	0.714969	0.643842	0.666914	0.387877	0.906924	0.434324	0.483901	0.680379	0.479042	0.790656	0.908906	0.641507	0	0	0	0.0458208	0.323002	0.479618	0.274921
ENSG00000137965	IFI44	0.540969	0.403003	0	0	0	0	0.181568	0	0	0	0	0	0	0	0	0.0660944	0	0	0	0.0968777	0	0
ENSG00000198910	L1CAM	0.540816	0.17272	0.31882	0.39529	0.412885	0.109441	0.42302	0.361466	0.344497	0.386991	0.357851	0.307695	0	0.322477	0.279443	0.40593	0.383884	0.445961	0.373655	0.366232	0.370406	0.408514
ENSG00000048471	SNX29	0.540178	0	0	0	0	0	0	0	0	0	0	0	0	0	0	0	0	0	0	0	0	0
ENSG00000101463	SYNDIG1	0.540038	0.192507	0.395277	0.0233978	0.711514	0	0	0.392715	0.0743973	0.372686	0.198616	0.0235475	0	0.360508	0.154151	0.0471803	0	0	0.339561	0.372991	0.275295	0.239771
ENSG00000175664	TEX26	0.538885	0	0	0	0	0	0.449084	0	0.478312	0	0.0564587	0.0944255	0	0	0	0	0	0	0	0	0	0
ENSG00000189195	AC104836.1	0.538838	0.00456621	0	0	0	0	0	0.00362647	0	0	0	0.119048	0	0	0	0	0	0	0	0	0	0
ENSG00000125966	MMP24	0.538485	0.336697	0.444618	0.299437	0.381216	0.14457	0	0.267585	0.148472	0.304376	0.115159	0	0	0.388657	0.407522	0.301097	0.198645	0.124828	0.464155	0.227007	0.343605	0.18979
ENSG00000064763	FAR2	0.538422	0.528546	0.00149282	0.190347	0	0	0.0867342	0.0768016	0	0.428812	0.202902	0	0	0.246857	0	0.205686	0.481579	0.339817	0	0.830963	0.138923	0
ENSG00000110427	KIAA1549L	0.537782	0.389461	0.497477	0	0.53284	0	0	0.655121	0.175172	0.409827	0.224654	0	0.519498	0.347984	0.0209575	0.534611	0.390954	0.622349	0.79392	0.822171	0.370475	0.0997954
ENSG00000171587	DSCAM	0.537481	0.486864	0.593311	0.512449	0.35924	0	0.379347	0.588039	0.464165	0.426568	0.415274	0.243266	0.0993316	0.627708	0.609766	0.0319575	0.0124741	0.15974	0.415595	0.628505	0.548102	0.581973
ENSG00000185818	NAT8L	0.537176	0.537665	0.682833	0.536916	0.519581	0.401017	0.308799	0.688001	0.383241	0.439699	0.456677	0.376526	0.742538	0.682977	0.583113	0.433788	0.20187	0.192429	0.401816	0.643262	0.507916	0.424029
ENSG00000149418	ST14	0.536883	0	0.33029	0	0.244904	0	0	0	0	0.416232	0.544598	0	0	0	0	0	0	0	0	0	0	0
ENSG00000166260	COX11	0.536475	0.352012	0.379687	0.133829	0.37248	0	0	0.532067	0.319708	0.413954	0.395228	0.490167	0.324891	0.572012	0.572677	0.197071	0	0.13828	0.156469	0.142762	0.347321	0.285713
ENSG00000165434	PGM2L1	0.534257	0.44202	0.445659	0.424574	0.437686	0.320746	0.404363	0.396927	0.381989	0.31139	0.43341	0.388056	0.118382	0.426534	0.458546	0.552077	0.465137	0.561048	0.605536	0.610542	0.440153	0.458205
ENSG00000179820	MYADM	0.534155	0.410976	0.568846	0	0.360953	0	0	0.502527	0.374253	0.388489	0.325874	0.299199	0.304006	0.534811	0.356457	0.297517	0.185058	0.421018	0.322136	0.589707	0.424395	0
ENSG00000262484	CCER2	0.531678	0.887494	0.943565	0	0.0171965	0	0	0.919167	0.393179	0.271575	0.879537	0.672894	0.989939	0.944206	0.871619	0	0	0	0	0	0.160655	0
ENSG00000196296	ATP2A1	0.531499	0.532544	0	0	0	0	0	0	0	0.790887	0	0	0	0.100454	0	0	0	0	0.02925	0.211066	0	0
ENSG00000205693	MANSC4	0.530857	0.0399606	0	0	0	0	0	0	0	0	0.00917939	0	0.67199	0	0.143924	0	0.48686	0	0	0.0741302	0.104131	0.141755
ENSG00000205090	TMEM240	0.530602	0.289187	0.462844	0.420087	0.455311	0	0	0.413623	0.395308	0.333437	0.34957	0.242035	0.331927	0.570809	0.391498	0.423219	0.0434257	0.288713	0.254244	0.503922	0.368907	0.397819
ENSG00000177301	KCNA2	0.529991	0.541749	0.66486	0.235764	0.445732	0.264457	0	0.657027	0.172328	0.508677	0.316285	0.304309	0.632824	0.648456	0.342456	0.0893424	0.099908	0.314064	0.282377	0.598726	0.455879	0.338522
ENSG00000138944	KIAA1644	0.528994	0.16666	0.0481433	0	0	0	0.0609748	0.0937032	0.328095	0	0	0.311749	0	0.053518	0.0817458	0.534914	0.52589	0.227546	0.335644	0	0.335935	0.174171
ENSG00000087152	ATXN7L3	0.528209	0.363432	0.535186	0.341546	0.456817	0.382796	0.335962	0.406116	0.119875	0.379591	0.323193	0.0326977	0.138369	0.555127	0.413904	0.427917	0.13797	0.382401	0.437299	0.529239	0.403307	0.521537
ENSG00000085382	HACE1	0.527536	0.174955	0.1935	0.218587	0	0.0882255	0.253181	0.120612	0.125237	0.0322424	0.0177565	0	0.385142	0.187085	0.243773	0.689827	0.475001	0.299501	0.20562	0.28948	0.236088	0
ENSG00000123999	INHA	0.526419	0.412269	0.227212	0.107118	0.466698	0	0	0.397662	0.376614	0.437065	0.181675	0.328071	0.453677	0.292294	0.227738	0.573697	0.297538	0.363508	0.381824	0.581354	0.46119	0.302529
ENSG00000106070	GRB10	0.526345	0.588017	0.447008	0.674314	0.298157	0	0.670516	0.430952	0.611426	0.422174	0.615413	0.459775	0.0885695	0.319998	0.653298	0	0	0	0	0	0.454226	0.466399
ENSG00000138641	HERC3	0.526041	0.364605	0.333694	0.595086	0.359646	0.141945	0.363792	0.363102	0.207667	0.375323	0.338813	0.157646	0.135963	0.372069	0.251516	0.491122	0.427056	0.519541	0.415379	0.634095	0.383895	0.289044
ENSG00000128159	TUBGCP6	0.524594	0.564938	0.5849	0.473677	0.335628	0.567314	0.20887	0.305935	0.220188	0	0.224236	0.374862	0.267741	0.24298	0.237722	0.198536	0	0.109472	0.1472	0.217727	0.181573	0.260201
ENSG00000203668	CHML	0.524283	0.710391	0.402188	0.233453	0.245333	0	0.364662	0.385439	0	0	0.154922	0	0	0.624131	0.392749	0	0.148363	0.385554	0	0.525128	0.410143	0
ENSG00000133059	DSTYK	0.523565	0	0.293483	0.208845	0.299674	0	0.335214	0.374803	0	0.148762	0.0640737	0.0928462	0.0915775	0.340305	0.256853	0.0288116	0.0196022	0.0673947	0.336676	0.0692775	0.348975	0.212967
ENSG00000102359	SRPX2	0.523047	0	0.563716	0	0	0	0	0	0	0	0	0	0	0.689122	0	0	0	0.172212	0	0.463832	0.0413005	0
ENSG00000157617	C2CD2	0.522901	0	0.118329	0	0	0.0862921	0.208569	0	0	0	0	0	0	0.126139	0	0	0	0	0	0.0625114	0.063754	0.167709
ENSG00000144642	RBMS3	0.522285	0.463516	0.302726	0.548306	0.229608	0.467835	0.475178	0.436496	0.0215327	0.188465	0	0.098989	0	0.36024	0.345568	0	0	0	0	0	0.197175	0.485879
ENSG00000204930	FAM221B	0.521869	0	0.126815	0.27537	0.415444	0	0.00255007	0.239986	0	0.17716	0.50924	0	0.0679862	0.0694111	0.193455	0.18823	0	0.186996	0.0217103	0.0732525	0	0
ENSG00000113248	PCDHB15	0.52168	0.37801	0.220199	0.0398657	0.112142	0	0	0.483938	0.0395467	0.404101	0	0.0326128	0.228202	0.531256	0.27617	0.254638	0	0	0	0.0736691	0.215786	0.102056
ENSG00000162426	SLC45A1	0.52135	0.358078	0.480881	0.214501	0.402681	0.140593	0.42438	0.557655	0.393571	0.375171	0.437008	0	0.388086	0.557936	0.4366	0.379936	0.112017	0.370838	0.349882	0.566703	0.449148	0.437178
ENSG00000175497	DPP10	0.518529	0.644401	0.431784	0.646352	0.113022	0.347137	0.0201479	0.456489	0.410508	0	0.416122	0.394111	0.100602	0.401107	0.512983	0.538369	0.378466	0.447289	0	0.636576	0.453912	0.319922
ENSG00000159147	DONSON	0.518331	0.41804	0.0858572	0.213792	0.0815511	0	0.225533	0.356774	0.241824	0.180025	0.218971	0.289318	0.312467	0.23807	0.112063	0.262184	0.057046	0	0.160871	0.29925	0.137783	0.13863
ENSG00000173114	LRRN3	0.517809	0.494413	0.212551	0.186525	0.225749	0	0	0.0456668	0.0124688	0	0	0.215205	0	0.12684	0.37338	0.412647	0.351582	0.358882	0.389755	0.326602	0.260832	0.404359
ENSG00000128510	CPA4	0.51778	0.172617	0.158793	0	0	0	0.605954	0.150073	0	0	0.1143	0	0	0	0	0	0	0.201364	0	0	0	0.0641387
ENSG00000123570	RAB9B	0.516493	0.655165	0.568838	0.783432	0.126754	0.397466	0.548057	0.606449	0.650493	0.540279	0.630377	0.476971	0.410819	0.458408	0.639218	0.301555	0.14735	0.410948	0.451625	0.274579	0.582863	0.0256858
ENSG00000163810	TGM4	0.516467	0	0	0.292275	0	0	0	0.0703975	0.00265252	0.511204	0	0	0.723033	0	0	0.779559	0	0	0.0946791	0.0183929	0	0
ENSG00000089091	DZANK1	0.515665	0.684814	0.709554	0.662069	0.465592	0.444232	0.466659	0.66651	0.57802	0.596142	0.601216	0.540688	0.542225	0.678366	0.679274	0.367328	0.326023	0.429275	0.320996	0.384197	0.584407	0.468291
ENSG00000138795	LEF1	0.515108	0.26712	0	0	0	0	0	0.564464	0	0	0.377107	0.958346	0	0.762654	0.0447761	0	0	0	0	0	0	0
ENSG00000139890	REM2	0.513852	0.365263	0.15856	0	0.427754	0	0	0.0954287	0.482867	0	0.347121	0.298413	0.66287	0	0	0	0	0	0.829018	0.341691	0	0
ENSG00000165023	DIRAS2	0.512607	0	0.355511	0.0115279	0.00748658	0.0318545	0.242385	0.38011	0.0210531	0.504783	0.0231586	0.302126	0	0.375058	0.262079	0.543556	0.449297	0.452606	0.627028	0.724406	0.148804	0.245815
ENSG00000002746	HECW1	0.512186	0.507702	0.595672	0.682082	0.392226	0.230912	0.200922	0.629269	0.42577	0.419946	0.444972	0.381455	0.379314	0.447933	0.452722	0.386569	0.272911	0.437938	0.405537	0.414098	0.389293	0.323257
ENSG00000091137	SLC26A4	0.511162	0	0	0	0	0	0	0	0	0	0	0	0	0	0	0.658742	0.866709	0.895805	0.996246	0.943921	0	0
ENSG00000133101	CCNA1	0.510792	0.216185	0	0	0	0	0	0	0	0.828696	0	0	0	0	0	0	0	0.0902056	0.387667	0.400743	0.566191	0
ENSG00000113657	DPYSL3	0.5103	0.338257	0.387738	0.24475	0.435383	0.259884	0.0991141	0.190176	0.291401	0	0.153196	0.141147	0	0.352483	0.296142	0.118737	0	0.205104	0.402479	0.233006	0.399536	0
ENSG00000158813	EDA	0.508792	0	0	0	0	0	0	0	0	0	0.226677	0	0	0	0.0497647	0.699518	0	0	0.140433	0.860544	0.137239	0.184941
ENSG00000001461	NIPAL3	0.507733	0.383307	0.543646	0.376797	0.401788	0	0.256127	0.403975	0.369603	0.22044	0.447741	0.381871	0.144251	0.430328	0.471846	0.37654	0.38052	0.405952	0.110205	0.41289	0.453626	0.391672
ENSG00000170390	DCLK2	0.506942	0.221589	0.343021	0.136048	0.296653	0.0999043	0	0.257935	0	0	0.0221721	0	0	0.475527	0.214384	0.246336	0.0336247	0.0514168	0.568163	0.279739	0.368238	0.291516
ENSG00000120254	MTHFD1L	0.506489	0.196842	0.239075	0.276362	0	0	0	0.0808654	0.166184	0	0	0	0	0.0248616	0	0	0.128312	0.0463203	0.153151	0	0.0501714	0.44069
ENSG00000107130	NCS1	0.505409	0.417845	0.626501	0.468896	0.408186	0.343925	0.423199	0.499454	0.280132	0.398374	0.403721	0.245778	0.270727	0.638621	0.497087	0.398772	0.213361	0.440127	0.512538	0.454888	0.510751	0.387455
ENSG00000130054	FAM155B	0.504619	0.478466	0.741203	0.470511	0	0.055618	0	0.239298	0	0	0.354762	0	0.13854	0.562679	0.246952	0.371828	0.0899175	0.330325	0.563738	0.486908	0.358551	0.260282
ENSG00000196141	SPATS2L	0.503804	0	0.104312	0	0	0	0	0.0149991	0.321966	0.0302091	0	0.163187	0	0	0	0	0	0	0	0	0.177714	0.225563
ENSG00000071794	HLTF	0.503443	0.0320772	0.238254	0.0902729	0	0	0.0438613	0.131361	0.418923	0	0.255535	0.179764	0.242855	0.146274	0.195303	0.0679471	0	0	0.0644483	0.131767	0.098196	0.328324
ENSG00000130032	PRRG3	0.503305	0.480126	0.592002	0.657559	0	0.334387	0.264617	0.598296	0.610052	0.406133	0.59906	0.407859	0.290567	0.395669	0.425211	0.40139	0	0.283292	0.22352	0.367858	0.365581	0.150633
ENSG00000163013	FBXO41	0.502794	0.474705	0.495451	0.5735	0.397859	0	0.366839	0.412388	0.371872	0.342836	0.377998	0.289292	0.463694	0.538257	0.382133	0.594762	0.434563	0.536409	0.536297	0.64432	0.532881	0.42572
ENSG00000117155	SSX2IP	0.502507	0.409274	0.38126	0.348343	0	0	0.308814	0.439073	0.415675	0.447847	0.422714	0.424293	0.125735	0.393025	0.500901	0.518591	0.217778	0.442122	0.514015	0.356805	0.41535	0.160324
ENSG00000160714	UBE2Q1	0.501394	0.229817	0.277591	0.547191	0.222124	0.271351	0.419763	0.304048	0.0216286	0.107004	0.240379	0.130722	0.0910428	0.382523	0.312736	0.208238	0.214472	0.320489	0.379746	0.332061	0.347705	0.363173
ENSG00000196876	SCN8A	0.501147	0.354638	0.625909	0.311569	0.404786	0.186712	0.0030083	0.636479	0.0656532	0.382967	0.220412	0.117865	0.565189	0.621814	0.384673	0.618087	0.399497	0.417919	0.600931	0.740629	0.415403	0.402486
ENSG00000000005	TNMD	0.500626	0.39007	0.127236	0	0.182786	0	0	0.88128	0	0	0.16545	0.634419	0	0.494844	0.431308	0	0	0	0	0.857244	0.617489	0.104788
ENSG00000091490	SEL1L3	0.500527	0	0	0	0	0	0	0	0	0.287715	0	0	0.40113	0	0	0.358436	0.117141	0.416644	0	0.837603	0	0.931263
ENSG00000176490	DIRAS1	0.500136	0.45445	0.657721	0.422751	0.471503	0.558243	0.325091	0.52966	0.345016	0.424322	0.337007	0.245035	0.143717	0.675419	0.497077	0.334511	0.169225	0.281102	0.326977	0.440869	0.635271	0.616074
ENSG00000173145	NOC3L	0.4999	0.0454888	0.290898	0	0	0	0.00445104	0.20512	0.207865	0.108852	0	0.00578309	0.260061	0.256359	0.0395356	0	0	0.11522	0.147512	0	0.175665	0
ENSG00000137103	TMEM8B	0.499876	0.337812	0.28843	0.225968	0.129688	0	0.206881	0.298486	0.357915	0.0684776	0.265286	0.0722421	0.129476	0.320855	0.348026	0.485247	0.337387	0.5197	0.481931	0.602053	0.353011	0.282261
ENSG00000169862	CTNND2	0.499622	0.332643	0.399651	0.233207	0	0.115223	0.344429	0.289567	0.180053	0.250651	0.324046	0.345035	0.242364	0.377427	0.321525	0.408214	0.376345	0.451063	0.356626	0.455939	0.39044	0.591417
ENSG00000103042	SLC38A7	0.498766	0	0.122225	0.522599	0	0	0.29786	0	0	0.172657	0	0	0	0.141277	0.24534	0.339485	0	0.256525	0.327707	0.144153	0	0.35353
ENSG00000104331	IMPAD1	0.498655	0.302613	0.38881	0.56647	0.0425444	0.164634	0.357247	0.319022	0.15234	0.132068	0.291966	0.194587	0.104278	0.375541	0.435601	0.162343	0	0.131457	0.142093	0.207036	0.369998	0.407521
ENSG00000135622	SEMA4F	0.498523	0.24375	0.22491	0.35272	0.389304	0	0.364093	0.465501	0.165317	0.104809	0.402928	0.165928	0.349196	0.278119	0.0846442	0.418232	0.530838	0.456736	0.375497	0.432492	0.0337933	0
ENSG00000161996	WDR90	0.497516	0	0	0	0	0	0.0285145	0.146365	0	0.436343	0	0	0.0613475	0	0	0.165986	0.344613	0.155576	0.0293641	0.666629	0	0
ENSG00000158158	CNNM4	0.497067	0.234795	0.0572207	0	0	0	0.205799	0.0423092	0.214412	0	0	0	0	0.0888928	0	0.00850047	0	0	0.553727	0.285206	0.0350937	0.189292
ENSG00000129473	BCL2L2	0.496862	0.484492	0.474364	0.131567	0.398032	0	0.081148	0.399945	0.302049	0.378172	0.32227	0.288785	0.257859	0.430404	0.404683	0.272258	0.0955392	0.319913	0.373526	0.32217	0.425583	0.421802
ENSG00000182771	GRID1	0.495653	0.360548	0.420783	0.279023	0	0.0667416	0.408299	0.330986	0.432218	0.467032	0.574217	0.0516413	0.25918	0.466804	0.282056	0.437993	0	0.403416	0.480589	0.587155	0.575519	0.384883
ENSG00000187323	DCC	0.495431	0.258963	0	0.193688	0	0	0.161112	0	0.159881	0.398135	0.0211623	0.245563	0.779374	0	0.0829071	0.0568395	0	0	0.580687	0	0.234259	0
ENSG00000167528	ZNF641	0.495412	0.259031	0.249358	0.181267	0	0	0	0.114442	0.286884	0.0429705	0.217125	0.19484	0	0.218661	0.146736	0	0.109744	0.0391775	0	0	0.215444	0.457479
ENSG00000135749	PCNX2	0.495154	0.350182	0.589424	0.342924	0.408771	0.461288	0	0.614999	0	0.320708	0.124307	0.122533	0.527167	0.482097	0.017418	0.61772	0.205781	0.391807	0.603458	0.904258	0.257752	0.213001
ENSG00000101333	PLCB4	0.494586	0.664609	0.565642	0.412949	0.541364	0.139842	0.137128	0.624516	0.410353	0.471265	0.380725	0.447396	0.479318	0.593867	0.434184	0	0	0	0	0.2562	0.426786	0.139287
ENSG00000147251	DOCK11	0.494548	0	0.146553	0.0930037	0	0	0.198224	0	0	0	0	0	0	0	0	0	0	0	0	0	0	0
ENSG00000175928	LRRN1	0.494545	0	0	0	0.530941	0.208722	0	0	0	0	0	0	0	0	0	0.167819	0	0	0	0	0	0
ENSG00000122025	FLT3	0.493207	0.879474	0.95135	0.25525	0.388083	0	0	0.908937	0.327751	0.38354	0.33171	0	0.912016	0.900224	0.633742	0	0	0	0.149424	0.479444	0.62086	0.204547
ENSG00000197381	ADARB1	0.492731	0.647947	0.593123	0.363186	0.643115	0.332679	0.0401495	0.51212	0.305434	0.544224	0.340813	0.285892	0.453482	0.639517	0.351081	0.487282	0.271364	0.143187	0.443763	0.11561	0.468587	0.539209
ENSG00000108272	NA	0.49152	0	0.0543044	0	0.577453	0	0	0.301299	0	0.368226	0	0.016022	0	0	0	0	0	0	0.077826	0	0	0
ENSG00000183473	NA	0.491509	0.594566	0.507425	0.0940953	0.879022	0	0	0.350539	0.256794	0.676155	0	0	0	0.182869	0.139368	0.901289	0.935863	0.735527	0.962532	0.146189	0	0
ENSG00000151079	AC005833.1	0.490474	0.637862	0.626416	0.221032	0.317582	0.318946	0	0.595249	0.219337	0	0.332457	0.343541	0.313575	0.494967	0.593593	0.28654	0.312814	0.392924	0	0.246442	0.511441	0.419248
ENSG00000143450	OAZ3	0.490035	0	0	0	0	0	0.0973201	0	0.354711	0	0	0	0.687121	0	0	0.0666327	0.0681014	0	0	0	0	0
ENSG00000068615	REEP1	0.489082	0.406949	0.420082	0.541114	0.398818	0.271792	0.543721	0.387608	0.312302	0.33364	0.362283	0.337328	0.184182	0.414015	0.430694	0.404935	0.369301	0.399587	0.347132	0.462092	0.450107	0.276534
ENSG00000131351	HAUS8	0.488877	0.425101	0.269884	0	0.307837	0	0	0.217349	0.042591	0	0.0279243	0	0	0.224147	0.339887	0	0	0	0	0	0.261817	0.125372
ENSG00000164304	CAGE1	0.487428	0	0.0553041	0.509049	0	0.913198	0.321205	0	0.418055	0.222102	0.0522008	0	0.803412	0	0.0335516	0.16454	0.207248	0	0.119089	0.137764	0	0.244824
ENSG00000182870	GALNT9	0.4872	0.332741	0.287978	0	0.530912	0	0	0.458839	0.237351	0.210955	0.101205	0	0.315938	0.32836	0.314854	0.407772	0.37776	0.648661	0.517874	0.933615	0.287647	0
ENSG00000211456	SACM1L	0.486944	0.4	0.598612	0.590201	0.0473214	0.314326	0.455043	0.394347	0	0.106144	0.295225	0.122245	0.2331	0.403656	0.337061	0	0	0.0506813	0	0.215591	0.427048	0.134566
ENSG00000108018	SORCS1	0.486592	0	0.026964	0.0825063	0.310468	0	0.546979	0	0	0.0234314	0.216006	0.364588	0	0.0824394	0.0278968	0.0929587	0	0	0	0.837993	0.213536	0.12789
ENSG00000070182	SPTB	0.486243	0.487574	0.412777	0.566126	0.649965	0.351345	0	0.653569	0.091811	0.369727	0.413482	0.149592	0.621122	0.542521	0.382641	0.400821	0	0	0.40806	0	0.319862	0
ENSG00000152128	TMEM163	0.486133	0.664707	0	0.515949	0	0	0.0525178	0.586027	0.783829	0.655601	0.785185	0.564417	0.66355	0	0	0	0	0	0	0.687733	0	0
ENSG00000140688	C16orf58	0.485767	0.0129265	0.33294	0.610687	0.16857	0.150337	0.139512	0.216632	0	0	0.395023	0	0	0.291007	0.542397	0	0	0	0.129387	0	0.277788	0.0290537
ENSG00000235156	TMEM30CP	0.485552	0.0150919	0	0	0	0	0	0.187887	0	0.496318	0	0	0.573213	0.0500277	0	0	0	0	0.114329	0.0663501	0.0475937	0.49294
ENSG00000144868	TMEM108	0.485527	0.290513	0	0.00141657	0	0	0	0.0396084	0.292202	0.228517	0.126123	0.0736499	0	0.0639694	0	0.163629	0	0.309445	0.50905	0.108263	0	0
ENSG00000075043	KCNQ2	0.485337	0.400332	0.47345	0.419791	0.358536	0.252906	0.291305	0.524713	0.429949	0.415712	0.483847	0.432147	0.448259	0.531751	0.48752	0.550078	0.427466	0.477298	0.651222	0.623895	0.454926	0.419064
ENSG00000128011	LRFN1	0.48466	0.339706	0.254141	0.325219	0.385903	0	0.304556	0.401164	0.361616	0.308959	0.394995	0.281192	0.308459	0.412957	0.374453	0.540961	0.429491	0.57516	0.534775	0.605102	0.335905	0.606346
ENSG00000164620	RELL2	0.483305	0.447717	0.560053	0.377525	0.596627	0.351852	0.351352	0.625642	0.389223	0.461729	0.427398	0.445694	0.417806	0.634633	0.505085	0.435005	0.299317	0.370137	0.454259	0.579811	0.511839	0.390303
ENSG00000140525	FANCI	0.482188	0	0	0	0.324357	0	0	0	0	0	0	0	0	0	0	0	0	0	0.224487	0	0	0
ENSG00000104918	RETN	0.481927	0	0	0	0	0	0	0	0.0371775	0	0	0	0.218782	0	0	0.938692	0.421277	0	0.562488	0.328753	0.694182	0
ENSG00000115687	PASK	0.480924	0	0	0.392264	0.140751	0	0	0.108253	0.104308	0.628668	0.202903	0.666379	0.0794966	0.113096	0.350768	0.0139455	0	0.0261905	0	0.0835461	0	0.451961
ENSG00000111490	TBC1D30	0.480819	0.164787	0.274026	0.331025	0.367684	0.311435	0.380889	0.299427	0.0745592	0.370298	0.179717	0.197617	0.393381	0.359704	0.148114	0.357368	0	0.214601	0.145092	0.5655	0.258336	0.904214
ENSG00000166448	TMEM130	0.480806	0.648933	0.660028	0.666724	0.438344	0.31362	0.475806	0.600087	0.587573	0.476823	0.640798	0.520097	0.454092	0.574792	0.67021	0.36829	0.354523	0.384861	0.26596	0.280055	0.558218	0.481777
ENSG00000174939	ASPHD1	0.480363	0.229259	0.399578	0	0.337021	0.0460674	0	0.363788	0.606574	0.401164	0.283579	0	0.316829	0.34354	0.185929	0.458892	0.281492	0.329823	0.323528	0.687893	0.621675	0.317106
ENSG00000082458	DLG3	0.479833	0.0621843	0.254624	0.000293083	0.340493	0	0.0994416	0.245561	0.00163054	0.295383	0.115188	0.00787049	0	0.323426	0.258451	0.696253	0.38903	0.555883	0.651173	0.60976	0.339137	0.437271
ENSG00000205683	DPF3	0.478739	0	0	0	0.665923	0.513359	0	0.0161163	0	0	0	0	0	0.101979	0	0	0	0	0.699155	0	0	0.231349
ENSG00000164077	MON1A	0.478487	0	0	0	0.148101	0	0	0.419771	0	0.00929705	0	0.185878	0	0.0554463	0	0	0	0	0.0169267	0.104467	0.0543987	0.192258
ENSG00000178602	OTOS	0.478451	0	0	0	0.892423	0	0	0	0	0	0	0	0	0	0	0	0	0	0.971914	0	0	0.310418
ENSG00000119946	CNNM1	0.478191	0.390104	0.352347	0.391243	0.292365	0.413123	0.288169	0.604481	0.386774	0.430043	0.398079	0.375515	0.571653	0.540918	0.41741	0.473448	0.396628	0.440334	0.512561	0.578327	0.412776	0.733671
ENSG00000203685	STUM	0.478173	0	0	0.128767	0	0	0	0	0.0425379	0.15906	0	0.316644	0	0	0	0.831378	0.787392	0.891553	0.841082	0.487236	0.177134	0
ENSG00000125841	NRSN2	0.478063	0.626857	0.593927	0.623084	0.417522	0.372282	0.476285	0.566321	0.580331	0.488491	0.588631	0.485576	0.476338	0.538376	0.651549	0.0467811	0	0.319136	0.182004	0.43192	0.535179	0.407625
ENSG00000138650	PCDH10	0.477753	0.324914	0.216655	0.307811	0	0.112069	0	0.205022	0.014531	0	0.0666573	0.551851	0	0.268339	0.167606	0.20683	0	0.144244	0	0.333431	0.341194	0.0262298
ENSG00000132182	NUP210	0.477745	0.439211	0.241441	0.195368	0.309287	0.044382	0	0.0131007	0.236192	0	0.327539	0	0.045728	0.318411	0.0293576	0.291841	0.278597	0.277037	0.287279	0.466736	0.525216	0.140394
ENSG00000165379	LRFN5	0.477629	0.516017	0.411915	0.412141	0.0813578	0.0462574	0	0.448727	0.54417	0.630781	0.425225	0.437011	0.403692	0.443666	0.517937	0.443367	0	0.457905	0.450897	0.533564	0.357485	0.452824
ENSG00000092068	SLC7A8	0.477456	0	0	0	0.405012	0	0.609171	0	0	0	0	0	0	0	0	0.347595	0.504504	0.644658	0.584852	0.633168	0	0.615284
ENSG00000188763	FZD9	0.47738	0	0	0	0	0.651037	0	0	0	0	0	0	0	0	0	0	0	0	0	0	0	0
ENSG00000219438	FAM19A5	0.477378	0.329557	0.36606	0.321365	0.0408406	0.0880992	0.310935	0.382912	0.369281	0.408177	0.346791	0.125736	0.105414	0.374748	0.403412	0.37271	0.0830076	0.201284	0.415047	0.0306339	0.36203	0.221411
ENSG00000183454	GRIN2A	0.477362	0.0202566	0.084297	0	0	0.206683	0	0.160614	0	0	0	0	0.409142	0.247663	0	0.734035	0.421615	0.538504	0.829747	0.848421	0	0
ENSG00000211455	STK38L	0.477255	0	0.115548	0.245034	0	0.106742	0.539187	0.234183	0	0	0	0	0	0.462981	0.0157471	0.0828251	0	0.117983	0	0.478631	0	0.111145
ENSG00000136193	SCRN1	0.47659	0.436166	0.427156	0.317736	0.316616	0.081476	0.408837	0.382836	0.395142	0.355062	0.397615	0.18534	0.0665107	0.40859	0.438652	0.324606	0.269347	0.328559	0.328814	0.00452175	0.455266	0.474339
ENSG00000175455	CCDC14	0.476531	0	0	0	0	0	0.114475	0	0.0732457	0	0	0	0	0	0	0	0.133771	0.169318	0	0.248795	0.0829962	0
ENSG00000101574	METTL4	0.47465	0	0	0	0	0	0	0	0	0	0	0	0	0	0	0.0150031	0	0	0	0	0	0.18504
ENSG00000167972	ABCA3	0.471686	0.245231	0.380342	0.246625	0.276619	0	0.323784	0.368332	0.0272876	0	0.352257	0	0.0937166	0.312414	0.361531	0.361385	0.257408	0.241064	0.405467	0.578984	0.348495	0.036315
ENSG00000131864	USP29	0.471487	0.639	0.547252	0.646699	0.416499	0.310578	0.596544	0.610164	0.659597	0.583575	0.643838	0.509741	0.436595	0.5035	0.629517	0	0	0	0.091584	0.172518	0.594065	0.469306
ENSG00000117906	RCN2	0.471249	0.127046	0	0.114832	0	0	0.18854	0	0.0466142	0.238041	0	0.0527899	0	0.0148453	0.0790797	0	0	0	0	0.0542203	0.0249469	0
ENSG00000171365	CLCN5	0.470994	0.502207	0.430777	0.676943	0.382678	0.295309	0.686248	0.443069	0.0575373	0.0176704	0.40484	0.384151	0	0.453381	0.632162	0	0	0	0	0	0.441953	0
ENSG00000182698	RESP18	0.470491	0.619578	0.49041	0.433935	0.463522	0	0.39132	0.487745	0.621479	0.473729	0.516383	0.483549	0.44401	0.474611	0.489266	0	0.379949	0.137296	0.247408	0.28852	0.476491	0.46562
ENSG00000108797	CNTNAP1	0.470129	0.445828	0.601393	0.545114	0.632796	0.429426	0.126547	0.66809	0.410071	0.48009	0.557677	0.42979	0.573207	0.672388	0.447247	0.408767	0.160937	0.381907	0.490738	0.699037	0.46227	0.442836
ENSG00000099364	FBXL19	0.469511	0.212504	0.420659	0.275317	0.33531	0.209043	0.113348	0.354324	0.279251	0.109429	0.323693	0.174544	0.218454	0.429176	0.340396	0.472482	0.376388	0.250804	0.394158	0.485767	0.376876	0.388413
ENSG00000170899	GSTA4	0.468856	0	0.353797	0.266743	0	0	0	0.247626	0	0	0.0394271	0	0.618523	0.0304135	0.623515	0	0	0.233355	0.173349	0	0	0
ENSG00000144647	POMGNT2	0.468268	0.34497	0.389171	0.373069	0.365832	0.017191	0.436432	0.390245	0.389047	0.218246	0.431547	0.340643	0.0538102	0.388015	0.375851	0.323757	0.0591677	0.288831	0.245565	0.538455	0.401937	0.354901
ENSG00000126467	TSKS	0.467576	0	0	0	0	0	0	0	0	0	0	0.201111	0	0	0	0.381619	0	0.560547	0	0.0704995	0	0
ENSG00000163888	CAMK2N2	0.467569	0.501123	0.481673	0.604361	0.511093	0.406169	0.460659	0.598293	0.480067	0.472245	0.557971	0.47254	0.416699	0.569143	0.627748	0.376011	0.347534	0.313319	0.36914	0	0.479077	0.482098
ENSG00000187772	LIN28B	0.467525	0.689817	0.786772	0.573797	0.266712	0.796482	0	0.069211	0.000723415	0	0.0396483	0	0.479415	0.560739	0.0331935	0.242057	0	0.0815476	0	0.219843	0.681306	0.472038
ENSG00000087448	KLHL42	0.467374	0.199938	0.0609058	0.171593	0.0650771	0	0.112878	0.274912	0	0.0830025	0.142744	0	0	0.344485	0.229802	0.154847	0	0.191745	0.214994	0.200494	0.0936477	0.0711032
ENSG00000018236	CNTN1	0.464608	0.401483	0.40246	0.462058	0.352555	0.288586	0.539977	0.406619	0.342166	0.376292	0.366569	0.297848	0.204479	0.380678	0.393188	0.42734	0.382278	0.417633	0.431169	0.500699	0.419006	0.161243
ENSG00000141582	CBX4	0.464585	0.188237	0.0802036	0.00356585	0.0439845	0	0	0.255276	0.308455	0.391534	0.215476	0	0.159331	0.299125	0.272608	0.182304	0	0.131641	0	0	0.0797788	0
ENSG00000119782	FKBP1B	0.464466	0.00656698	0.237211	0.164622	0.550343	0	0.294386	0.324574	0.200717	0.361342	0.0714957	0.00275147	0.166169	0.368436	0.269439	0.320157	0.273131	0.340791	0.460813	0.396763	0.406559	0.471844
ENSG00000049618	ARID1B	0.463745	0.2319	0.136378	0.0223232	0	0	0.124443	0.171867	0.0599463	0.193043	0	0	0	0.0414587	0.0243573	0.477397	0.0439756	0.202851	0.39995	0.265902	0.18154	0.400264
ENSG00000006071	ABCC8	0.463605	0.152641	0.401351	0.233771	0.509179	0.0351685	0	0.690818	0.166391	0.0399093	0	0	0.380218	0.538499	0.196371	0.374162	0.0338296	0.14664	0.287435	0.489615	0.142464	0.057864
ENSG00000154065	ANKRD29	0.462529	0.415673	0.680942	0.307959	0.503102	0.319562	0.198521	0.412875	0.350005	0.419429	0.0496097	0.204947	0.0659091	0.632032	0.40423	0	0	0	0.419048	0.33087	0.590004	0.413769
ENSG00000099814	CEP170B	0.462313	0.455891	0.512106	0.426227	0.530124	0.375007	0.450482	0.456424	0.4319	0.427195	0.455829	0.373881	0.377911	0.46436	0.541901	0.448878	0.438063	0.465356	0.445323	0.446916	0.471282	0.470482
ENSG00000139767	SRRM4	0.460747	0	0	0.253741	0.0290462	0.225739	0.236311	0	0.410597	0.311836	0.0497079	0	0	0.238792	0.0675082	0.21427	0.462072	0.392284	0.380025	0.0228923	0.509741	0.394119
ENSG00000188916	FAM196A	0.460231	0.330139	0.900644	0.0994938	0	0	0	0.586332	0.324355	0.0913265	0.286265	0	0.673618	0.723091	0.502512	0	0.00560142	0.480684	0.248303	0.304481	0.923516	0.362041
ENSG00000170571	EMB	0.460167	0.429212	0.356116	0.443123	0.359433	0	0.46889	0.451484	0.42478	0.476514	0.41163	0.204891	0.308021	0.386756	0.334181	0	0	0.395396	0.0305049	0.456078	0.179844	0
ENSG00000133878	DUSP26	0.459654	0.473274	0.414007	0.405132	0.44454	0	0.433159	0.455084	0.471437	0.459358	0.47171	0.461185	0.351171	0.439118	0.477786	0.359325	0.133881	0.311169	0.068877	0.150271	0.472324	0.446136
ENSG00000125355	TMEM255A	0.4596	0.4849	0.451881	0.695839	0	0.0848315	0.783779	0.488155	0.470171	0.396705	0.486236	0.500376	0.406029	0.345434	0.374369	0.197381	0	0.062655	0	0	0.448651	0.0784475
ENSG00000125447	GGA3	0.458684	0.189684	0.433512	0.282972	0.383287	0	0.225546	0.461541	0.156086	0.28612	0.422548	0.0323138	0.385948	0.37007	0.300507	0.435322	0.0109795	0.253451	0.519311	0.413486	0.241146	0.262213
ENSG00000151690	MFSD6	0.457914	0.4239	0.476066	0.576693	0.408899	0.264486	0.418194	0.445117	0.313948	0.245352	0.460344	0.354082	0.281126	0.444757	0.424679	0.30122	0.17356	0.359113	0.357215	0.558173	0.426182	0.294775
ENSG00000148408	CACNA1B	0.45769	0.34399	0.371311	0.445701	0.272569	0.264159	0.512049	0.38423	0.435747	0.384345	0.412485	0.274116	0.128409	0.303829	0.38898	0.462994	0.4124	0.409716	0.454894	0.432924	0.396769	0.676291
ENSG00000162374	ELAVL4	0.457466	0.462441	0.459694	0.442081	0.456182	0	0.459501	0.329989	0.39758	0.458387	0.228917	0.304578	0.378799	0.458189	0.353048	0.414947	0.359099	0.449498	0.26095	0.453397	0.465266	0.302244
ENSG00000128482	RNF112	0.457416	0.0974944	0.215259	0.274924	0	0	0.360281	0.1965	0.278703	0.299321	0.293916	0.072818	0.33608	0.10834	0.159421	0.590693	0.410326	0.467577	0.770235	0.793657	0.131101	0
ENSG00000151952	TMEM132D	0.457297	0	0	0.301648	0	0	0	0	6.02845e-05	0.778288	0	0	0	0.0523418	0.0299202	0.906872	0	0.212852	0	0.924301	0	0
ENSG00000135956	TMEM127	0.456351	0.339989	0.524301	0.0292106	0.387233	0.0137721	0.224695	0.378209	0.153857	0.189643	0.0178504	0.0191323	0.0476604	0.518301	0.382151	0.358685	0.107489	0.333973	0.385573	0.5672	0.488747	0.427534
ENSG00000163900	TMEM41A	0.45625	0.0289958	0.309944	0.000389408	0.290375	0	0	0.279244	0.0041243	0.457951	0.178899	0	0.14399	0.339332	0	0	0	0.0914478	0.201547	0.207103	0.20858	0.3615
ENSG00000177992	SPATA31E1	0.455982	0.0870735	0	0	0.610449	0	0	0.24333	0	0	0.298028	0.75226	0	0	0	0.419388	0	0	0.303659	0.501178	0.617075	0
ENSG00000203724	C1orf53	0.45511	0.539381	0.245762	0	0.0829419	0	0	0.58468	0.653742	0.549469	0.622865	0.514716	0.422494	0.298903	0.101686	0	0	0	0.371734	0.0313635	0.213729	0.355227
ENSG00000258986	TMEM179	0.454792	0.443494	0.446847	0.503688	0.319654	0	0.461594	0.462596	0.469258	0.44135	0.460865	0.36418	0.410746	0.452622	0.462812	0.457039	0.383485	0.383188	0.452999	0.578063	0.418227	0.440651
ENSG00000127561	SYNGR3	0.454652	0.428756	0.434224	0.45213	0.440864	0.352627	0.433973	0.389665	0.443962	0.440217	0.441603	0.389646	0.274849	0.431784	0.43744	0.442092	0.376623	0.390427	0.374313	0.436095	0.462658	0.458645
ENSG00000198934	MAGEE1	0.454297	0.539209	0.638841	0.449913	0.421211	0	0.424928	0.44688	0.451125	0.436828	0.425897	0.389427	0.333236	0.487269	0.459097	0.374927	0.415929	0.313602	0.368823	0.454986	0.479266	0.458464
ENSG00000109436	TBC1D9	0.453482	0.443947	0.459754	0.39339	0.493261	0	0.42814	0.424775	0.383487	0.267468	0.323947	0.407245	0.184122	0.457077	0.439859	0.408165	0.132173	0.398244	0.327451	0.413413	0.461645	0.515684
ENSG00000153237	CCDC148	0.452262	0	0	0.107306	0	0	0.271664	0	0.234569	0	0.137741	0.288031	0	0	0.213253	0.454413	0.2489	0.300207	0.379756	0.272721	0.311188	0.567646
ENSG00000096070	BRPF3	0.451789	0.0832939	0.0839122	0.123061	0.437074	0	0.0705211	0	0	0.0179138	0.136625	0	0	0.00923372	0	0.26834	0.230285	0.324301	0.201048	0.177373	0	0
ENSG00000155980	KIF5A	0.451034	0.456936	0.467981	0.453107	0.459746	0.329253	0.393465	0.468408	0.437686	0.46166	0.428122	0.3981	0.433104	0.472814	0.466744	0.43862	0.395408	0.429614	0.45479	0.447745	0.459916	0.452945
ENSG00000081692	JMJD4	0.450785	0	0	0.0300331	0.485304	0.0732584	0.308632	0.0178465	0.0124789	0	0.141842	0.385871	0	0.233076	0.45376	0.177885	0.250494	0.136509	0.282466	0.282995	0.247236	0.524734
ENSG00000163618	CADPS	0.450247	0.437705	0.484059	0.669041	0.453572	0.433514	0.465737	0.420084	0.334819	0.40237	0.385049	0.141733	0.269887	0.49465	0.458988	0.415521	0.157928	0.320971	0.457661	0.392252	0.458256	0.565994
ENSG00000172350	ABCG4	0.450148	0.445396	0.645219	0.495533	0.318701	0.0357303	0.300171	0.565368	0.342478	0.394459	0.297846	0.358288	0.312271	0.608551	0.414886	0.368441	0	0.371298	0.342087	0.464585	0.371424	0.420011
ENSG00000184672	RALYL	0.450088	0.455492	0.438933	0.397031	0.19837	0	0.554193	0.420359	0.447783	0.461436	0.437718	0.446268	0.142981	0.428838	0.459765	0.444193	0.419766	0.291814	0.44103	0.439416	0.464438	0.42403
ENSG00000104722	NEFM	0.449441	0.476574	0.843065	0.438449	0.619698	0.308451	0.348798	0.763601	0.0684347	0.451066	0.376823	0.190931	0.797618	0.749844	0.43755	0.422052	0	0	0.458534	0.625639	0.566184	0
ENSG00000198797	BRINP2	0.448947	0	0.00713753	0	0	0	0	0.183597	0.603777	0.845454	0.161498	0	0.0898396	0	0	0.627861	0.579728	0.438241	0.779935	0.224719	0.113213	0
ENSG00000029534	ANK1	0.448863	0.433149	0.44613	0.433095	0.616465	0.645822	0.155001	0.486706	0.231934	0.54121	0.281325	0.244719	0.456271	0.639134	0.545313	0	0	0	0	0.00303224	0.455112	0.417171
ENSG00000168036	CTNNB1	0.448496	0.261866	0.284764	0.180318	0	0	0.205126	0.109619	0	0	0.109357	0.0507423	0	0.210942	0.115173	0.274874	0.18464	0.182736	0.270634	0.0714111	0.137429	0.125245
ENSG00000106772	PRUNE2	0.44777	0.423487	0.424686	0.288968	0.446925	0.240959	0.44927	0.432918	0	0.461133	0.144511	0.380108	0	0.412497	0.419831	0.319787	0.121088	0.362296	0.383045	0.177306	0.386117	0.191259
ENSG00000188771	PLET1	0.447762	0	0	0.0789525	0	0	0	0.0709907	0	0	0.791062	0.275467	0	0	0	0	0	0.514236	0.0429791	0	0	0
ENSG00000197121	PGAP1	0.447433	0.272583	0.296513	0.574723	0	0	0.388865	0.0559098	0.377428	0	0.391207	0.15788	0.0610294	0.16742	0.518425	0.0527515	0.0203495	0	0.333228	0	0.5637	0
ENSG00000198300	PEG3	0.447131	0.572231	0.584629	0.605245	0.386468	0.260411	0.482941	0.488345	0.464437	0.454585	0.500113	0.451408	0.426614	0.473158	0.571299	0.171518	0.160612	0.261939	0.271031	0.396539	0.468851	0.44134
ENSG00000078328	RBFOX1	0.446991	0.207941	0.24718	0.374193	0.117609	0.343784	0	0.425341	0.395017	0.484858	0.412505	0.368612	0.639011	0.319291	0.303187	0.594745	0.323168	0.360798	0.574833	0.409588	0	0
ENSG00000174013	FBXO45	0.446484	0.288049	0.299518	0.29528	0.274218	0.13184	0.290479	0.340668	0	0.152957	0.250465	0.0318659	0.107019	0.324101	0.17028	0.420176	0.116739	0.368381	0.560035	0.350426	0.274708	0.260017
ENSG00000148798	INA	0.44624	0.464033	0.598106	0.53676	0.592847	0.335905	0.423463	0.611743	0.418053	0.398046	0.462472	0.409842	0.43354	0.613335	0.484889	0.403005	0.405159	0.41722	0.460177	0.562819	0.452919	0.431096
ENSG00000257704	INAFM1	0.445874	0.469045	0.438336	0.387662	0.44726	0	0.23999	0.45564	0.526494	0.464248	0.466249	0.445782	0.228806	0.445146	0.465896	0.209729	0.260634	0.319372	0.223642	0.238225	0.461643	0.458376
ENSG00000102003	SYP	0.44564	0.457878	0.488562	0.436864	0.435745	0.303732	0.369809	0.45433	0.449209	0.45	0.444267	0.414678	0.405802	0.464486	0.463346	0.48592	0.391925	0.429858	0.471857	0.563175	0.465699	0.436503
ENSG00000197535	MYO5A	0.445588	0.432898	0.43036	0.397595	0.412749	0.341746	0.329014	0.424222	0.347768	0.424316	0.388934	0.24383	0.310321	0.421222	0.412243	0.41611	0.358295	0.388853	0.404492	0.482393	0.431988	0.428769
ENSG00000161594	KLHL10	0.445374	0	0	0	0	0	0	0	0	0	0	0	0	0.177281	0	0.0520475	0	0	0	0	0	0
ENSG00000132872	SYT4	0.444998	0.438369	0.466023	0.551776	0.418446	0.373093	0.454699	0.446933	0.449684	0.359324	0.45589	0.450399	0.431787	0.426722	0.469158	0.450411	0.339803	0.467953	0.450485	0.501859	0.469777	0.433461
ENSG00000112941	PAPD7	0.444653	0.286138	0.344604	0.283171	0.281319	0	0.276367	0.322941	0.144869	0.124408	0.343354	0.0974664	0.0314171	0.307187	0.352792	0.299239	0.332631	0.0890816	0.476398	0.226715	0.340429	0.229734
ENSG00000166924	NYAP1	0.444565	0.4595	0.520646	0.446072	0.552153	0.238836	0.55328	0.466026	0.431878	0.410164	0.458156	0.404719	0.418804	0.460777	0.461317	0.408989	0.370677	0.364696	0.422141	0.398779	0.511054	0.46558
ENSG00000117335	CD46	0.443991	0	0	0.205948	0.00366089	0	0.13163	0	0	0	0	0	0	0.200282	0	0.280446	0	0.179993	0	0.15995	0	0.0611914
ENSG00000163376	KBTBD8	0.443962	0	0	0	0	0	0.228916	0	0	0	0	0	0	0	0	0.407656	0.35157	0.497056	0.201635	0.293963	0	0
ENSG00000198932	GPRASP1	0.443883	0.472098	0.481653	0.650808	0.353967	0.314947	0.455181	0.470239	0.506081	0.464317	0.460621	0.445694	0.428009	0.467279	0.467501	0.357869	0.271202	0.0625517	0.28156	0.332416	0.471401	0.408514
ENSG00000163214	DHX57	0.443154	0.120081	0.180253	0.191861	0.00684008	0	0.351381	0.300685	0	0.299351	0.0210917	0.239917	0.254144	0.165731	0.362049	0.373047	0	0.307202	0.332862	0.50509	0.322328	0.18105
ENSG00000177485	ZBTB33	0.443079	0	0	0.35349	0	0	0.215523	0	0	0	0	0	0	0	0	0.122029	0	0	0.287179	0.0370651	0	0.178351
ENSG00000152214	RIT2	0.442678	0.480659	0.476391	0.494873	0.362622	0.425659	0.488062	0.482489	0.475973	0.469785	0.47434	0.479928	0.34771	0.4832	0.480039	0.215511	0	0.255994	0.227226	0.318965	0.483783	0.390642
ENSG00000105429	MEGF8	0.442568	0.425433	0.548089	0.404996	0.40737	0.418099	0.269482	0.564036	0.262841	0.356244	0.393592	0.296436	0.402324	0.500644	0.517208	0.376985	0.183612	0.274902	0.371483	0.573169	0.438598	0.419161
ENSG00000119523	ALG2	0.442547	0.45525	0.465189	0.523398	0.429374	0.146329	0.467423	0.463999	0.437182	0.329763	0.49887	0.37172	0.2434	0.470529	0.585982	0.325471	0.323562	0.346146	0.390493	0.361225	0.468629	0.47698
ENSG00000141404	GNAL	0.442465	0.420442	0.40396	0.334364	0.444688	0	0	0.379557	0.0528007	0	0.155392	0.123112	0	0.405772	0.327831	0.514005	0.405952	0.386806	0.420145	0	0.435168	0.431344
ENSG00000160710	ADAR	0.442289	0.604204	0.617875	0.573879	0.43167	0.383636	0.436311	0.540454	0.452358	0.38138	0.437092	0.37329	0.401534	0.539522	0.623862	0.343949	0.281738	0.319749	0.364267	0.396243	0.531826	0.459505
ENSG00000172461	FUT9	0.442271	0.569452	0.553161	0.516514	0.183924	0.0719092	0.33345	0.549203	0.357226	0.383171	0.372807	0.377958	0.524501	0.5159	0.489708	0.34987	0.292342	0.451792	0.232054	0.558821	0.499721	0.27652
ENSG00000160396	HIPK4	0.441815	0	0.117701	0	0.713007	0	0.056658	0.73076	0.443261	0.104365	0.27316	0	0.0941923	0	0	0.0314165	0	0	0.297935	0	0.768456	0.0739734
ENSG00000174206	C12orf66	0.441803	0	0.355785	0	0	0	0.0491932	0.0726221	0	0	0	0.126832	0	0	0.319434	0.411294	0	0.301914	0.229233	0.0716167	0	0.143461
ENSG00000114923	SLC4A3	0.441792	0.41159	0.470966	0.39379	0.585932	0.310878	0.102468	0.562165	0.265522	0.426099	0.239602	0.324749	0.068984	0.591675	0.401439	0.420283	0.179387	0.384125	0.34976	0.64698	0.453771	0.43482
ENSG00000166436	TRIM66	0.441357	0.797699	0.822734	0.691385	0.673639	0	0.286782	0.766517	0.584465	0.525942	0.905134	0.787646	0.363611	0.79223	0.93119	0	0.286912	0.313459	0	0.297169	0.606631	0.105346
ENSG00000186017	ZNF566	0.441165	0.0328678	0	0	0.0957611	0.0642697	0	0	0.330525	0	0	0	0	0	0.0359554	0	0	0	0.0801442	0.0306416	0.206599	0.0223584
ENSG00000142583	SLC2A5	0.441149	0	0	0	0	0.391752	0	0	0	0	0	0	0	0	0.146055	0	0	0	0	0	0	0
ENSG00000163288	GABRB1	0.440883	0.269692	0.315723	0.581961	0	0	0.583781	0.190843	0.359176	0	0.510192	0.0194523	0.0239973	0.172706	0.312821	0.506337	0.289733	0.410535	0.626908	0.422914	0.47931	0.176761
ENSG00000136531	SCN2A	0.440541	0.461912	0.410898	0.538534	0.309347	0.118797	0.372548	0.420687	0.505365	0.437111	0.447039	0.412818	0.361108	0.370024	0.444619	0.608189	0.449851	0.443329	0.546605	0.625581	0.434519	0.436124
ENSG00000099625	CBARP	0.440312	0.49115	0.458957	0.456916	0.41593	0.0856812	0.422556	0.450566	0.517156	0.472181	0.530078	0.4459	0.387927	0.454431	0.515642	0.45411	0.376434	0.355672	0.450078	0.429616	0.469401	0.452783
ENSG00000189184	PCDH18	0.44004	0.791053	0.609703	0.16663	0	0.135169	0.69784	0.406479	0.316507	0.172739	0.438576	0.800876	0	0.0090456	0.317983	0	0	0	0	0	0.293275	0
ENSG00000103353	UBFD1	0.440027	0.584852	0.66626	0.316656	0.379088	0.377044	0.377046	0.538719	0.324784	0.0627421	0.441702	0.419492	0.0997326	0.57016	0.578875	0.076174	0	0	0.266439	0.0418934	0.568915	0.419419
ENSG00000145920	CPLX2	0.439959	0.316211	0.377267	0.216365	0.10254	0.192914	0.534149	0.412397	0	0	0.165027	0.294665	0.299405	0.41982	0.339603	0.648035	0	0.0380682	0.658189	0.036174	0.392133	0.746195
ENSG00000249853	HS3ST5	0.439188	0.349273	0.181481	0.513612	0.443146	0.599955	0.602035	0.41959	0.425767	0.426621	0.366357	0.394519	0.10705	0.241138	0.49599	0	0	0.110569	0	0.0426478	0.250185	0
ENSG00000133636	NTS	0.438867	0.315097	0.536724	0	0	0	0	0.2388	0.245641	0	0	0	0	0	0	0	0	0	0	0.569389	0.928976	0
ENSG00000106789	CORO2A	0.438714	0.285965	0.238366	0.431902	0.435683	0.137175	0.399055	0.398283	0.305007	0.207632	0.41196	0.155477	0.0683155	0.297334	0.454952	0.109011	0.202258	0.462271	0.451572	0.390955	0.181468	0.130475
ENSG00000143847	PPFIA4	0.438472	0.413664	0.494932	0.399631	0.591288	0.114597	0.45488	0.528318	0.364296	0.433514	0.443604	0.352068	0.389838	0.510139	0.459766	0	0	0	0.511493	0.341517	0.536897	0.452069
ENSG00000135119	RNFT2	0.438455	0.393701	0.489993	0.169561	0.393854	0	0.0642962	0.370953	0.182786	0.403257	0.342767	0.217943	0.378822	0.434271	0.336419	0.528702	0.333922	0.417289	0.569706	0.644062	0.550692	0.415805
ENSG00000136153	LMO7	0.438397	0	0	0	0	0	0	0	0	0	0	0	0.630154	0	0	0.960277	0.923179	0.547082	0.842096	0.820122	0	0
ENSG00000157064	NMNAT2	0.437838	0.544773	0.541327	0.340737	0.449766	0	0.387911	0.443885	0.394096	0.388048	0.444141	0.393193	0.306965	0.474714	0.514335	0.452472	0.321068	0.448067	0.450258	0.416594	0.505779	0.480854
ENSG00000176788	BASP1	0.437443	0.510919	0.440933	0.426147	0.308254	0.203112	0.382375	0.42317	0.445963	0.41462	0.450767	0.400164	0.195789	0.429609	0.441423	0.455281	0.42792	0.449004	0.522981	0.407043	0.435088	0.433043
ENSG00000205363	C15orf59	0.437016	0.22709	0.249423	0.252528	0.2209	0.484813	0	0.365996	0.397075	0.623756	0.225795	0.274714	0.273495	0.400391	0.358077	0.511385	0.452957	0.381321	0.524128	0.431434	0.300978	0.555083
ENSG00000135503	ACVR1B	0.436907	0.388101	0.365178	0.460897	0.0703029	0.182865	0.265147	0.470903	0.37818	0.433521	0.415365	0.190662	0.393407	0.459423	0.502367	0.569512	0.331349	0.442252	0.413791	0.667436	0.463199	0.377843
ENSG00000058335	RASGRF1	0.436727	0.583482	0.543192	0.48271	0.553093	0	0.460693	0.502497	0.619903	0.577272	0.442076	0.427736	0.429138	0.506459	0.566071	0.418693	0.417817	0.354565	0.498503	0.63634	0.466892	0.382243
ENSG00000115137	DNAJC27	0.436725	0.632468	0.765571	0.551517	0.553247	0.347492	0.396752	0.637388	0.431978	0.427493	0.546608	0.447859	0.39924	0.689458	0.67364	0.342997	0.273478	0.397681	0.430517	0.391248	0.638644	0.443776
ENSG00000186462	NAP1L2	0.436678	0.653006	0.68615	0.678008	0.361891	0.455159	0.444465	0.607314	0.460786	0.445483	0.449872	0.462184	0.511498	0.609303	0.571506	0.141575	0.0569864	0.0457915	0.338702	0.373346	0.584212	0.293397
ENSG00000152977	ZIC1	0.435656	0.183288	0.416803	0	0.749543	0.46408	0	0	0	0	0	0	0	0	0	0	0	0	0	0	0	0
ENSG00000198026	ZNF335	0.435531	0	0.0181541	0	0	0	0.106686	0.320397	0.0541558	0	0.243934	0.150617	0	0	0.189724	0.201477	0	0.0752583	0.248757	0.43506	0.249863	0.0766515
ENSG00000047230	CTPS2	0.435372	0.300921	0.486961	0.181126	0.349922	0.123097	0.287447	0.145821	0.025657	0.193624	0.130671	0.000959816	0	0.267835	0.262204	0	0	0.0382576	0.0170371	0	0.368138	0.029987
ENSG00000137507	LRRC32	0.435311	0	0	0	0	0	0	0	0	0	0	0	0	0	0	0.142704	0	0	0	0.0536784	0	0
ENSG00000105409	ATP1A3	0.435163	0.484099	0.533529	0.491803	0.477639	0.378593	0.365892	0.510155	0.455852	0.473954	0.444567	0.437664	0.439394	0.56989	0.466631	0.442788	0.417941	0.330234	0.449221	0.521041	0.468931	0.46102
ENSG00000124140	SLC12A5	0.434944	0.61301	0.609685	0.63206	0.402605	0.393641	0.422657	0.601092	0.54879	0.508926	0.496046	0.45859	0.49423	0.628238	0.582482	0.481508	0.382929	0.411804	0.421224	0.56143	0.474525	0.392025
ENSG00000185436	IFNLR1	0.434896	0	0	0.401252	0.340856	0	0	0.390813	0.0585966	0	0	0	0	0.708446	0.410987	0	0.459403	0	0	0.0332595	0	0
ENSG00000130540	SULT4A1	0.434634	0.451147	0.458274	0.409671	0.451695	0.202691	0.390906	0.450562	0.422931	0.448073	0.441924	0.372328	0.358128	0.460611	0.468244	0.442081	0.368873	0.39953	0.451877	0.447934	0.458659	0.446172
ENSG00000170616	NA	0.434606	0.37168	0.628969	0.150915	0.52089	0.558361	0	0.420193	0.0292538	0.559428	0	0.149575	0.538483	0.693083	0.270523	0.0246858	0	0	0.225352	0.34139	0.428905	0.694703
ENSG00000133069	TMCC2	0.434497	0	0.123783	0.133834	0.599248	0	0.0349585	0.121402	0	0	0.0406802	0	0	0.248659	0.0475037	0.0626059	0.0672568	0.110574	0.403412	0	0.205674	0.0673666
ENSG00000172782	FADS6	0.434465	0.267444	0.312584	0.237793	0.544616	0.0203371	0	0.157659	0.197757	0.207164	0.338197	0	0.0356283	0.600285	0.0940025	0	0	0	0	0	0.284096	0.0416329
ENSG00000167703	SLC43A2	0.434232	0.0309153	0.403706	0.57665	0.570091	0.10879	0	0.249636	0	0	0	0	0.00287433	0.480173	0.243535	0	0	0	0	0.325756	0.0329972	0
ENSG00000160097	FNDC5	0.434227	0.589106	0.760785	0.538312	0.573388	0.402368	0	0.635027	0.0565413	0.395608	0.269034	0.296713	0.346918	0.79387	0.604693	0	0	0	0.342877	0	0.625147	0.451965
ENSG00000143630	HCN3	0.433978	0.420642	0.593841	0.607707	0.431758	0.380464	0.580316	0.39167	0.408463	0	0.415977	0.386726	0	0.535082	0.667085	0	0	0.441922	0.0347085	0.0778497	0.676642	0.716976
ENSG00000183837	PNMA3	0.433715	0.609491	0.611145	0.68757	0.403819	0	0.658275	0.427081	0.745421	0.425587	0.600357	0.596634	0.313848	0.444511	0.752896	0.302642	0.388345	0	0.390284	0	0.572733	0.367034
ENSG00000091844	RGS17	0.433201	0.46303	0.454386	0.462786	0.379862	0.295315	0.45444	0.449072	0.476485	0.460493	0.452384	0.445419	0.401264	0.455085	0.43924	0.35639	0.366158	0.249383	0	0.306107	0.457036	0.422115
ENSG00000158301	GPRASP2	0.433088	0.476345	0.472326	0.712808	0.41612	0.380373	0.565132	0.469076	0.493814	0.470995	0.539637	0.486526	0.353215	0.462252	0.481002	0	0.0503564	0	0.127522	0.00293303	0.485741	0.453909
ENSG00000187860	CCDC157	0.432803	0	0	0.00939447	0	0	0.0672292	0	0	0	0	0	0	0	0	0.0350388	0	0	0	0.158464	0	0
ENSG00000206190	ATP10A	0.43275	0.0130971	0	0	0	0.334985	0	0	0	0	0	0	0	0	0	0	0	0	0	0	0	0
ENSG00000188089	PLA2G4E	0.432389	0.436976	0.658444	0.596328	0.293722	0	0.198209	0.359845	0.164997	0.446665	0.545784	0.166905	0.51593	0.491342	0.684817	0.425885	0.388874	0.345686	0.101988	0.782288	0.581383	0.258464
ENSG00000154118	JPH3	0.431875	0.400007	0.328563	0.563765	0.418556	0	0.373519	0.445393	0.412621	0.384781	0.42433	0.398	0.512719	0.418605	0.423153	0.550988	0.349599	0.410247	0.602594	0.421121	0.359976	0.359237
ENSG00000067715	SYT1	0.431769	0.384655	0.422126	0.311069	0.395842	0.241064	0.367604	0.26667	0.38181	0.418491	0.263592	0.183133	0.153209	0.391762	0.323537	0.452697	0.308922	0.400116	0.446216	0.499924	0.434752	0.477827
ENSG00000128881	TTBK2	0.431655	0.490618	0.580764	0.579912	0.364267	0.3408	0.446562	0.54744	0.39044	0.44804	0.414089	0.39877	0.216372	0.626858	0.530081	0.307197	0	0.272489	0.0425262	0.411459	0.469681	0.392812
ENSG00000105963	ADAP1	0.431432	0.246987	0.301558	0.231453	0.531907	0	0.189322	0.336462	0	0.262508	0.0192127	0.0303302	0.194174	0.353463	0.261968	0.515836	0.216212	0.385181	0.421839	0.570152	0.168966	0.211139
ENSG00000154277	UCHL1	0.431385	0.451704	0.43856	0.408516	0.431285	0.195542	0.379527	0.421458	0.434594	0.375446	0.431732	0.402911	0	0.420318	0.44359	0.434156	0.379934	0.385685	0.443164	0.409166	0.441376	0.420391
ENSG00000167549	CORO6	0.431276	0.540196	0.757879	0.622174	0.592441	0.781958	0.0300909	0.896667	0.404024	0.698931	0.395715	0.0167648	0.963015	0.914	0.518286	0	0	0	0	0.947781	0.870958	0
ENSG00000198785	GRIN3A	0.430953	0.429841	0.436986	0.461883	0.408733	0	0.152688	0.413099	0.551952	0.0987042	0.423535	0.0444075	0.517463	0.409411	0.456214	0.405666	0.644865	0.372973	0.308328	0.16508	0.455284	0.104389
ENSG00000114270	COL7A1	0.430898	0	0	0.0524727	0.29433	0.387645	0.802996	0	0	0	0	0	0.086704	0	0	0	0.135318	0	0	0	0	0
ENSG00000146006	LRRTM2	0.430863	0.618496	0.346153	0.185093	0	0	0.450487	0.416338	0.409242	0.333414	0.096049	0.0994369	0.0852273	0.376713	0.465505	0.15764	0.476071	0.415604	0.268336	0.455649	0.256135	0.358802
ENSG00000186367	KIAA1024L	0.430762	0.478309	0.469033	0.564799	0.252225	0	0.558829	0.47099	0.542562	0.431854	0.64378	0.529489	0	0.360893	0.483035	0.129562	0.13942	0.344013	0.35558	0	0.479016	0.329675
ENSG00000103723	AP3B2	0.430463	0.377712	0.423596	0.386861	0.330927	0	0.383488	0.43576	0.293692	0.37125	0.365955	0	0.381051	0.434841	0.368258	0.418217	0.310722	0.238184	0.430748	0.527126	0.412477	0.402569
ENSG00000117360	PRPF3	0.430043	0.0701323	0.0231375	0	0.410589	0	0	0.147792	0.278997	0	0.065272	0.0416712	0	0.19781	0	0.0993409	0	0	0.0865488	0.105438	0	0.0990607
ENSG00000055163	CYFIP2	0.4294	0.425407	0.415026	0.41401	0.433007	0.361847	0.300116	0.436137	0.374271	0.413255	0.417869	0.338487	0.349095	0.444816	0.42004	0.456759	0.394116	0.428891	0.473734	0.544164	0.409016	0.400313
ENSG00000166780	C16orf45	0.429364	0.438633	0.417598	0.362888	0.406754	0.148024	0.32416	0.431096	0.520454	0.512606	0.449118	0.434893	0.31671	0.431945	0.456751	0.421636	0.359304	0.381511	0.42794	0.390296	0.437965	0.380504
ENSG00000155974	GRIP1	0.429254	0.237312	0.374944	0.150165	0	0	0.357822	0.246118	0.0153942	0	0	0.036473	0.108866	0.328486	0.271914	0.196188	0.341261	0.208604	0.343224	0.0197025	0.415397	0.857914
ENSG00000102743	SLC25A15	0.429242	0	0.10689	0.032905	0	0	0.0160886	0.247603	0	0	0	0	0.298853	0.423006	0.151079	0	0	0	0	0	0	0
ENSG00000198689	SLC9A6	0.429062	0.342547	0.313817	0.685448	0.211703	0.341546	0.45949	0.396221	0.354827	0.388698	0.442634	0.384263	0.361789	0.343903	0.377125	0.34246	0.325023	0.391859	0.376036	0.287948	0.345848	0.426513
ENSG00000136653	NA	0.428392	0.388726	0.708809	0.434394	0.621804	0.187094	0.381679	0.616308	0.390024	0.361171	0.524609	0.4324	0.40172	0.469298	0.590543	0	0.275436	0.427575	0.0798086	0.299174	0.643206	0.337148
ENSG00000134030	CTIF	0.428355	0.324994	0.461253	0.463165	0.524311	0.198154	0.585432	0.479341	0.337499	0.124655	0.395796	0.151453	0	0.444212	0.492514	0.0786988	0.126609	0.0228822	0.371483	0.00118136	0.361495	0.409202
ENSG00000164306	PRIMPOL	0.427059	0	0	0	0	0	0.138075	0	0	0	0	0	0	0.143327	0	0	0	0	0	0	0	0
ENSG00000151834	GABRA2	0.426996	0.351432	0.416005	0.173871	0.255894	0	0.343966	0.0757589	0.329911	0	0.363624	0	0.148797	0.177409	0.195004	0.650723	0.420953	0.444444	0.68343	0.507529	0.438396	0.439374
ENSG00000111300	NAA25	0.426797	0.276879	0.290945	0.334173	0.252362	0	0.169343	0.391998	0.149836	0.0446356	0.353446	0.107389	0.071807	0.289118	0.325602	0.348621	0	0.326724	0.330863	0.373802	0.230475	0.125069
ENSG00000110429	FBXO3	0.426521	0.336848	0.486628	0.428792	0.309456	0.105522	0.362848	0.375626	0.380947	0.352396	0.352301	0.253419	0.253611	0.422406	0.399416	0	0	0	0.0268126	0.102005	0.383848	0.163426
ENSG00000104435	STMN2	0.426478	0.447202	0.431576	0.404097	0.406546	0.178827	0.369174	0.424126	0.455943	0.438788	0.437689	0.386344	0.083623	0.422568	0.441403	0.447314	0.389607	0.383582	0.447219	0.430379	0.431906	0.436249
ENSG00000148154	UGCG	0.426463	0.404717	0.399605	0.615919	0.105946	0.384237	0.375001	0.428065	0.31089	0.365677	0.202883	0.15299	0.281368	0.432443	0.390656	0.424923	0.105945	0.388757	0.39164	0.428501	0.411114	0.44527
ENSG00000163689	C3orf67	0.426426	0.190006	0.681182	0	0.0417148	0	0	0.126129	0.060586	0	0.0127184	0.210455	0.121506	0.24564	0.708666	0.191544	0.128887	0.308792	0.239197	0.0863873	0.635032	0
ENSG00000151917	BEND6	0.426175	0.597591	0.629642	0.582578	0.562871	0.282069	0.363925	0.684278	0.569443	0.569841	0.609407	0.466323	0.625092	0.666734	0.634856	0.349352	0.328414	0.422152	0.368037	0.308165	0.472573	0.465849
ENSG00000183077	AFMID	0.425988	0.263382	0.599291	0	0.668094	0	0	0	0	0	0	0	0	0.401603	0.36305	0.0117518	0	0.0709416	0	0.0879349	0.63932	0
ENSG00000120053	GOT1	0.425937	0.580907	0.65738	0.373846	0.537876	0.294323	0.237262	0.442987	0.337583	0.428033	0.417241	0.351912	0.390164	0.608616	0.453801	0.396116	0.246495	0.302275	0.378101	0.41349	0.547838	0.413445
ENSG00000084734	GCKR	0.425844	0	0	0	0	0	0	0	0.186431	0	0	0	0	0	0	0.133691	0	0	0	0	0	0
ENSG00000125746	EML2	0.42572	0.456037	0.571621	0.336777	0.523004	0.316818	0.336312	0.528065	0.327621	0.350072	0.381331	0.264793	0.152473	0.586006	0.556905	0	0.115716	0	0.304018	0.250766	0.433892	0.403907
ENSG00000085365	SCAMP1	0.425691	0.413389	0.394426	0.418569	0.278086	0.150442	0.380992	0.426339	0.400214	0.364249	0.409879	0.354228	0.292094	0.424204	0.43206	0.395384	0.236208	0.34072	0.417568	0.386546	0.380667	0.324896
ENSG00000118420	UBE3D	0.425663	0.00557743	0	0	0	0	0.0339392	0.172374	0.213931	0.201433	0	0.163228	0.667863	0.059304	0.246628	0.120284	0.420232	0	0	0.0151213	0	0
ENSG00000013293	SLC7A14	0.425659	0.438271	0.455223	0.632536	0.464369	0.237753	0.444662	0.474009	0.422504	0.0685031	0.467237	0.455433	0.17417	0.469156	0.478165	0.436445	0.0894976	0.153692	0.528602	0.160003	0.476744	0.448837
ENSG00000125814	NAPB	0.425403	0.457665	0.455143	0.428678	0.441937	0.232072	0.343566	0.456236	0.448	0.446082	0.444389	0.406907	0.395849	0.45602	0.459518	0.522684	0.410636	0.450148	0.46482	0.428567	0.451914	0.443697
ENSG00000143502	SUSD4	0.425219	0.399006	0.596766	0.354201	0	0.0345879	0.312329	0.419851	0.353018	0.410199	0.423319	0.34707	0.464829	0.524543	0.429745	0.378673	0.258694	0.422467	0.521876	0.396399	0.449658	0.395619
ENSG00000082641	NFE2L1	0.42473	0.381617	0.441266	0.362932	0.375465	0.196068	0.377686	0.427606	0.310715	0.304486	0.37887	0.284656	0.374285	0.449157	0.426126	0.386591	0.143999	0.347159	0.394505	0.422552	0.432211	0.402047
ENSG00000134986	NREP	0.424682	0	0.268475	0.14582	0.398493	0.321635	0	0	0	0	0	0	0	0.211927	0	0	0	0	0	0	0.185242	0
ENSG00000162378	ZYG11B	0.424658	0.404301	0.460878	0.407764	0.336472	0.253737	0.41097	0.420284	0.305033	0.376936	0.370896	0.173488	0.212523	0.453535	0.499095	0.37732	0.169477	0.423089	0.464894	0.530705	0.443832	0.413096
ENSG00000162706	CADM3	0.424638	0.392832	0.424361	0.435961	0.418418	0.16968	0.376317	0.430657	0.308637	0.400025	0.434489	0.397979	0.281524	0.436188	0.442283	0.49321	0.328905	0.377772	0.445406	0.401192	0.394126	0.386967
ENSG00000178252	WDR6	0.424567	0.464689	0.431458	0.476215	0.417221	0.128347	0.471632	0.41979	0.572657	0.435366	0.475399	0.459735	0	0.42262	0.469649	0.325021	0.384977	0.36631	0.370107	0.12328	0.475001	0.460312
ENSG00000183060	LYSMD4	0.424545	0.564821	0.494403	0.0862153	0.402036	0	0	0.528784	0.443507	0.410211	0.525728	0.433453	0.271962	0.460072	0.559425	0.330119	0.206716	0.317867	0.411472	0.230251	0.525179	0.327749
ENSG00000185338	SOCS1	0.424394	0	0	0	0	0	0	0	0	0	0	0	0	0	0	0	0	0	0	0	0	0
ENSG00000122966	CIT	0.424298	0.408179	0.415017	0.409945	0.373955	0.254701	0.345762	0.455677	0.371966	0.52143	0.410773	0.398242	0.38906	0.451626	0.420656	0.402678	0	0.0131715	0	0.482328	0.427091	0.539157
ENSG00000138698	RAP1GDS1	0.424074	0.12548	0.320628	0.103263	0.359861	0.174727	0.244637	0.286504	0	0.401144	0	0.244535	0.111163	0.337169	0.305144	0.19805	0.0835824	0.289827	0.338205	0.339081	0.271551	0.398077
ENSG00000117602	RCAN3	0.424044	0.346973	0.429364	0.394455	0.443745	0.395275	0.658637	0.378977	0.177333	0	0.35556	0.243601	0	0.393611	0.439594	0	0	0	0	0	0.441564	0.452039
ENSG00000203805	PLPP4	0.423749	0.0852834	0.0320459	0.306912	0.704593	0.373281	0	0.130719	0.685724	0.538074	0.388722	0.694213	0	0.305653	0.403275	0	0	0	0	0	0.0174617	0
ENSG00000159082	SYNJ1	0.423561	0.462543	0.536685	0.422723	0.422123	0.280306	0.402764	0.42209	0.37877	0.406526	0.419998	0.318634	0.231183	0.471892	0.46917	0.42981	0.399186	0.447452	0.516875	0.414535	0.43907	0.446914
ENSG00000136720	HS6ST1	0.423554	0.320658	0.359692	0	0.392589	0	0	0.399005	0.145694	0.272346	0.103835	0	0.582771	0.501016	0.204128	0.379389	0.260852	0.39331	0.248789	0.578915	0.193502	0
ENSG00000112796	ENPP5	0.423035	0.41855	0.513092	0.330484	0.316294	0.0773759	0.391703	0.423665	0.405647	0.374279	0.311822	0.240354	0.391617	0.55258	0.419993	0.287449	0.0680041	0.318098	0.281517	0.483579	0.442808	0.414032
ENSG00000182255	KCNA4	0.423028	0.122681	0	0.596973	0	0	0.263187	0.214598	0.162403	0.286929	0.203146	0	0.0932389	0	0.00754136	0.469452	0	0.0404762	0.298393	0	0	0
ENSG00000079102	RUNX1T1	0.422841	0.412579	0.123621	0.506596	0.372733	0.403672	0	0.578976	0.689372	0.590618	0.443417	0.307925	0.768057	0.324449	0.354448	0.365963	0.334198	0.450571	0.436009	0.307306	0.383248	0
ENSG00000113327	GABRG2	0.422604	0.645897	0.708016	0.626294	0.150959	0	0.344093	0.651862	0.540293	0.569589	0.448047	0.45381	0.61457	0.612908	0.492198	0.515952	0.121086	0.250475	0.352138	0.470251	0.559074	0.445296
ENSG00000113649	TCERG1	0.422257	0.109293	0.123472	0.211375	0.0654464	0	0.135537	0.0369589	0.0683388	0.249063	0	0	0	0.0529536	0	0.244952	0	0	0.307354	0.24307	0.0400301	0.0257922
ENSG00000180488	MIGA1	0.421952	0.520796	0.598159	0.37834	0.398599	0.12842	0.37439	0.433864	0.407224	0.336254	0.407465	0.390698	0.291573	0.539573	0.439983	0.37746	0.304127	0.321689	0.372513	0.407037	0.450747	0.402012
ENSG00000040199	PHLPP2	0.421892	0.539688	0.493268	0.615229	0.303948	0.24971	0.392367	0.442783	0.395495	0.347677	0.516272	0.364036	0.388217	0.412437	0.60382	0.40518	0.250286	0.305401	0.261641	0.415653	0.44371	0.435067
ENSG00000178233	TMEM151B	0.421885	0.420427	0.666216	0.39315	0.63472	0.508372	0	0.424515	0.0615768	0.151368	0.342631	0.0666752	0.297176	0.635	0.576028	0.450814	0.453423	0.399948	0.581249	0.519695	0.45303	0.36265
ENSG00000156113	KCNMA1	0.421478	0.370148	0.123995	0.394719	0.196702	0	0.126196	0.268952	0.12726	0.0409566	0.229932	0.213337	0.0516711	0.30649	0.2439	0.667883	0.542857	0.45673	0.562104	0.627788	0.108202	0
ENSG00000182636	NDN	0.421389	0.437496	0.458488	0.413172	0.290273	0.000735913	0.396893	0.404993	0.426974	0.235176	0.400255	0.339408	0.157821	0.39205	0.409022	0.139879	0.261152	0.209711	0.378263	0.268361	0.459798	0.350326
ENSG00000152767	FARP1	0.42112	0	0	0	0	0	0.0629173	0	0	0	0	0	0	0	0	0.358074	0.182734	0.0118506	0	0.596866	0	0
ENSG00000138400	MDH1B	0.420574	0	0	0	0	0	0	0	0	0	0	0	0	0	0	0	0	0	0.078564	0	0	0.0337733
ENSG00000170500	LONRF2	0.420485	0.467723	0.520645	0.650191	0.433219	0.157556	0.565471	0.453619	0.466736	0.423615	0.52792	0.465205	0.391405	0.472178	0.538667	0.42156	0.390573	0.460291	0.446031	0.415012	0.47597	0.43534
ENSG00000087263	OGFOD1	0.420141	0.626786	0.635794	0.684018	0.407878	0.192184	0.401397	0.669513	0.60391	0.449506	0.718042	0.613611	0.50821	0.607924	0.670613	0.440819	0.318927	0.435328	0.456363	0.478225	0.510778	0.415332
ENSG00000065609	SNAP91	0.419565	0.433321	0.389339	0.667245	0.456128	0.251438	0.46128	0.43729	0.396681	0.435333	0.434437	0.333891	0.303161	0.432586	0.412615	0.408174	0.334093	0.444859	0.486122	0.380347	0.389542	0.418854
ENSG00000187189	TSPYL4	0.419307	0.538857	0.505088	0.377487	0.412321	0.221646	0.321144	0.453235	0.465465	0.466344	0.449225	0.423626	0.403498	0.497706	0.458708	0.320676	0.187054	0.314903	0.395868	0.311286	0.454763	0.43373
ENSG00000121871	SLITRK3	0.419041	0.557345	0.240023	0.00405432	0	0	0	0.623251	0.131477	0.481979	0.0323657	0	0.280629	0.329577	0.203045	0.692621	0.473856	0.249183	0.604042	0.563257	0.164308	0.00344912
ENSG00000126216	TUBGCP3	0.418929	0.0409679	0.27014	0.253135	0.0730455	0	0.301121	0.242459	0.0435929	0.0608096	0.137258	0.0581944	0.39057	0.484035	0.400045	0.132368	0	0.0746925	0.161123	0.325707	0.238647	0.281949
ENSG00000143499	SMYD2	0.418678	0.248256	0.250825	0.236649	0.0740975	0.0976661	0.205398	0.310521	0.299462	0.417951	0.0612082	0.253101	0.479011	0.382163	0.181458	0.457582	0.134689	0.286691	0.392908	0.26771	0.277454	0.400879
ENSG00000184350	MRGPRE	0.418623	0.380884	0.38952	0.380452	0.13878	0	0.623936	0.293133	0.276868	0.360177	0.494964	0.409033	0.316617	0.409735	0.367289	0	0.346051	0.345122	0	0.0931629	0.40809	0.477681
ENSG00000171450	CDK5R2	0.418454	0.384568	0.386602	0.482476	0.415154	0.377494	0.396653	0.423184	0.405228	0.431017	0.369309	0.176625	0.272343	0.421857	0.41673	0.55294	0.423178	0.431112	0.402984	0.583359	0.396373	0.445107
ENSG00000186469	GNG2	0.418001	0.40202	0.306796	0.358146	0	0	0.421584	0.2231	0.429868	0.297315	0.415608	0.391168	0.164572	0.244276	0.384781	0.352441	0.261558	0.368809	0.459297	0.112168	0.386997	0.621475
ENSG00000177098	SCN4B	0.417749	0.146711	0.727601	0	0.44681	0.502024	0	0.883501	0	0	0	0	0.890679	0.794608	0	0	0	0	0	0.923016	0	0
ENSG00000145198	VWA5B2	0.417548	0.601026	0.608022	0.659857	0.535081	0.493314	0.396843	0.781086	0.579906	0.625042	0.682053	0.541606	0.728198	0.67045	0.635964	0.318209	0	0.343312	0.208515	0.521295	0.444883	0.216739
ENSG00000137337	MDC1	0.417384	0	0	0	0.415662	0.112809	0	0	0	0	0	0	0	0.416358	0.0605016	0	0	0.00535714	0	0	0	0
ENSG00000111674	ENO2	0.417315	0.46821	0.563714	0.449367	0.448038	0.306608	0.401602	0.465683	0.461692	0.466288	0.46199	0.412259	0.511155	0.570129	0.49112	0.43576	0.37399	0.390698	0.426469	0.444299	0.47208	0.367538
ENSG00000138463	DIRC2	0.417205	0	0.0512689	0.10731	0.0122367	0	0.314304	0	0	0	0	0	0	0.114416	0	0.0997031	0.0544378	0.0949626	0.138097	0.235222	0.0454706	0.120013
ENSG00000105641	SLC5A5	0.41703	0	0	0	0	0	0.0654674	0	0.584708	0.329735	0.455433	0.419894	0	0	0.297455	0	0	0.758998	0	0.901501	0.506393	0.231392
ENSG00000171298	GAA	0.417006	0.470826	0.457963	0.512448	0.284992	0.28686	0.44344	0.442837	0.46831	0.40181	0.494909	0.437072	0.233521	0.443553	0.544319	0	0.0492067	0.0969008	0.198655	0.40583	0.458788	0.384869
ENSG00000145730	PAM	0.416305	0.379662	0.0140884	0.391436	0	0	0.463292	0.401642	0.417762	0	0.427747	0.343123	0	0.310907	0.229379	0.361011	0	0	0.0627675	0	0.00477707	0.434188
ENSG00000197106	SLC6A17	0.416291	0.44858	0.531586	0.435902	0.612702	0.368445	0.412988	0.437727	0.265656	0.419433	0.302796	0.236216	0.219025	0.523347	0.49791	0.459847	0.431434	0.466534	0.527936	0.648348	0.458512	0.52693
ENSG00000139910	NOVA1	0.416166	0.822165	0.871771	0.710711	0.520423	0.339745	0	0.790677	0.58524	0.214589	0.719936	0.610665	0.689108	0.82789	0.790368	0	0	0	0	0.182562	0.678279	0
ENSG00000167447	SMG8	0.416054	0	0.143593	0	0	0	0	0.0372256	0	0.0896688	0	0	0	0.185272	0	0	0	0	0	0.288154	0.242278	0
ENSG00000172020	GAP43	0.415945	0.46868	0.41025	0.392161	0	0	0.372557	0.42454	0.51122	0.463077	0.462816	0.435926	0.288015	0.369234	0.457905	0.457886	0.422157	0.416123	0.416213	0.413246	0.455985	0.425179
ENSG00000168772	CXXC4	0.415862	0.600906	0.445181	0.643136	0.392062	0.276813	0.40537	0.455969	0.610393	0.60225	0.445099	0.375867	0.591369	0.573192	0.446738	0	0	0.52501	0	0.445773	0.414992	0.444795
ENSG00000175352	NRIP3	0.415756	0.453322	0.378935	0.382665	0.48289	0.448353	0.449466	0.217168	0	0.428571	0.0720124	0	0.339632	0.433279	0.415613	0	0.0484594	0.42363	0.654454	0.58064	0.426826	0.848272
ENSG00000008277	ADAM22	0.415456	0.416655	0.457537	0.390414	0.312334	0.0747477	0.273173	0.511096	0.414503	0.441945	0.397599	0.242563	0.403636	0.426332	0.420294	0.472112	0.38507	0.406127	0.338726	0.528058	0.406026	0.451448
ENSG00000135631	RAB11FIP5	0.415393	0.447859	0.633863	0.597288	0.577857	0.34912	0.45193	0.46305	0.307434	0.412574	0.449754	0.432475	0.364852	0.671192	0.509917	0.187852	0.0385146	0.14464	0.36816	0.400555	0.502804	0.423485
ENSG00000109184	DCUN1D4	0.415273	0.555304	0.502761	0.505862	0.324086	0	0.426631	0.549679	0.45827	0.339189	0.611708	0.418818	0.289039	0.493241	0.608914	0.484519	0.341682	0.411425	0.417255	0.35138	0.436487	0.071137
ENSG00000261115	TMEM178B	0.415151	0.312665	0.564142	0.252145	0	0.241673	0.202233	0.368135	0.282494	0.187338	0.3005	0.0161889	0.0810829	0.480491	0.494195	0.596504	0.31583	0.341116	0.592806	0.571845	0.588392	0.487779
ENSG00000157881	PANK4	0.414957	0.548349	0.525288	0	0.604213	0.0844944	0	0.575496	0.0905403	0.473882	0	0	0.802316	0.532096	0.564758	0.0754606	0	0	0	0.041813	0.554026	0
ENSG00000177169	ULK1	0.414872	0.288579	0.454652	0.458689	0.317392	0.283886	0.20941	0.4579	0.0693498	0.352307	0.388928	0.0896032	0.0437834	0.449047	0.304372	0.237195	0.0113819	0.325121	0.309537	0.313884	0.375858	0.274843
ENSG00000130881	LRP3	0.414784	0.427139	0.551514	0.355576	0.282078	0.360691	0.301369	0.581607	0.379291	0.401824	0.397467	0.40466	0.374417	0.61249	0.474749	0.417393	0.341489	0.363663	0.404857	0.580483	0.42353	0.390426
ENSG00000189299	FOXR2	0.41478	0	0.826449	0	0	0	0	0.373779	0.73998	0.315414	0.873246	0.315722	0	0.487015	0.62171	0	0	0.311354	0	0.0542212	0.218262	0
ENSG00000155511	GRIA1	0.414651	0.31861	0.339727	0.0119676	0	0.221471	0	0.334325	0.0659889	0	0.391552	0	0.224212	0.281088	0.409299	0.545515	0.511774	0.429836	0.708823	0.554842	0.293892	0.382257
ENSG00000176293	ZNF135	0.414465	0.445292	0.495351	0.0095405	0	0	0.426596	0.0115187	0	0	0.0988166	0	0.613149	0.42467	0.0790712	0.146937	0.0279334	0	0.267317	0.520082	0.0531836	0.348054
ENSG00000033627	ATP6V0A1	0.414352	0.33637	0.400027	0.4077	0.428604	0.241291	0.373249	0.37423	0.358525	0.33694	0.307327	0.136102	0.289103	0.429089	0.426828	0.432126	0.307448	0.420017	0.427401	0.533118	0.399605	0.434154
ENSG00000152332	UHMK1	0.41377	0.458043	0.440982	0.56796	0.413796	0.212281	0.458289	0.453412	0.400196	0.363803	0.43143	0.395759	0.309864	0.456135	0.444274	0.402353	0.253209	0.46862	0.436408	0.399229	0.460461	0.463791
ENSG00000253368	TRNP1	0.413329	0.459155	0.464574	0.299356	0.581265	0.385094	0.29185	0.519442	0.0244101	0.449173	0.246475	0	0.22833	0.555095	0.417072	0.349694	0.237299	0.417933	0.465406	0.431763	0.473274	0.490929
ENSG00000188730	VWC2	0.413073	0.736303	0.271414	0.298064	0.321143	0	0.0983067	0.443843	0.408429	0.581322	0.583741	0.450476	0	0.365108	0.333853	0	0	0	0	0	0.453297	0.816958
ENSG00000086300	SNX10	0.412896	0.373782	0.355031	0.282514	0.37481	0	0.447636	0.292397	0.1162	0.0258036	0.149472	0.106923	0	0.215894	0.349215	0.449312	0.446004	0.463929	0.433296	0.405548	0.416619	0.493475
ENSG00000106976	DNM1	0.41269	0.481038	0.554175	0.337377	0.530233	0.277075	0.207195	0.47421	0.430939	0.452991	0.415942	0.345173	0.419977	0.555259	0.449325	0.451447	0.391879	0.421763	0.526223	0.492995	0.450126	0.407181
ENSG00000073969	NSF	0.412366	0.460911	0.477647	0.424746	0.43208	0.319216	0.28155	0.440349	0.437439	0.44156	0.442061	0.400282	0.412082	0.483235	0.441694	0.465258	0.411023	0.413661	0.502716	0.40414	0.431626	0.410696
ENSG00000008735	MAPK8IP2	0.412365	0.393679	0.451574	0.450361	0.450679	0.368791	0.441695	0.441078	0.385504	0.420426	0.41821	0.302576	0.30998	0.470959	0.419081	0.42922	0.396911	0.425172	0.458291	0.429203	0.450233	0.4157
ENSG00000050438	SLC4A8	0.412232	0.577134	0.656396	0.562182	0.572127	0.344952	0	0.575067	0.269472	0.311376	0.357866	0.378567	0.0497995	0.71967	0.6443	0.407231	0.248871	0.354184	0.381688	0.574809	0.621934	0.381385
ENSG00000174996	KLC2	0.411642	0.426011	0.440611	0.428138	0.439906	0.391841	0.347545	0.523711	0.278117	0.441914	0.39192	0.397473	0.463503	0.515138	0.436353	0.398483	0.301461	0.408156	0.417824	0.500264	0.414193	0.359645
ENSG00000083544	TDRD3	0.411475	0	0.0398897	0.219298	0	0.0625843	0	0.0346427	0.0454666	0	0	0	0	0.231089	0	0	0	0	0.0717743	0.116588	0.267989	0
ENSG00000176125	UFSP1	0.411442	0.521362	0.36658	0.549827	0.442583	0.198845	0.645255	0.420206	0.278276	0.186957	0.363148	0.296298	0.303237	0.430738	0.446014	0	0	0	0.21729	0	0.412766	0.26024
ENSG00000137486	ARRB1	0.411431	0.405262	0.569551	0.280298	0.392565	0.299723	0	0.432067	0.307616	0.409261	0.355581	0.120721	0.458852	0.562018	0.486559	0.166303	0.168073	0.378471	0.246106	0.120057	0.409892	0.314595
ENSG00000118200	CAMSAP2	0.411368	0.317328	0.39397	0.360807	0.316335	0.0268082	0.430467	0.354858	0.285264	0.425732	0.286783	0.151962	0.177846	0.326583	0.328963	0.407328	0.0649575	0.381358	0.508286	0.255057	0.3736	0.393601
ENSG00000100401	RANGAP1	0.411116	0.390175	0.432114	0.39634	0.425953	0.192783	0.419895	0.42936	0.448163	0.455045	0.430388	0.32259	0.274998	0.438356	0.417195	0.406394	0.287224	0.432836	0.433208	0.40336	0.398372	0.447578
ENSG00000179532	DNHD1	0.410999	0.591164	0	0.0505257	0.111416	0	0.250329	0.0718311	0.115679	0	0	0	0	0.0318442	0.0703764	0.337887	0	0.0807359	0	0.0237791	0	0
ENSG00000185716	C16orf52	0.410862	0.193296	0.391842	0.659346	0.149453	0.436598	0.445338	0.322353	0.186604	0.256083	0.284719	0	0.0686497	0.412428	0.386048	0.226164	0	0.202799	0.269596	0.299757	0.390731	0.418055
ENSG00000141371	C17orf64	0.4107	0	0	0.055588	0	0	0	0.0716828	0.0153726	0	0.173793	0	0	0	0	0.0847305	0	0.132846	0	0.0119694	0.717745	0
ENSG00000118402	ELOVL4	0.410628	0.414614	0.391215	0.646471	0.418955	0.556653	0.455644	0.378982	0.268884	0.148422	0.352651	0.162558	0.456717	0.340908	0.244366	0.31855	0.0225339	0.0205062	0.352982	0.401478	0.306296	0.389784
ENSG00000040933	INPP4A	0.410402	0.323125	0.370779	0.41129	0.382067	0	0.415359	0.375958	0.251164	0.311999	0.340317	0.183627	0.214325	0.401477	0.389427	0.394664	0.326963	0.397078	0.38655	0.41021	0.379692	0.236692
ENSG00000106723	SPIN1	0.410359	0.316309	0.357477	0.599029	0.283984	0.366806	0.425416	0.357834	0.402698	0.272931	0.365412	0.334382	0.0997995	0.393882	0.434109	0.381232	0.270705	0.374921	0.383208	0.255074	0.350193	0.30914
ENSG00000198780	FAM169A	0.409936	0.423273	0.423544	0.638722	0	0.0847565	0.474332	0.444668	0.497311	0.443478	0.439247	0.391703	0.392899	0.410312	0.517045	0.336214	0.343186	0.329351	0.282883	0.411546	0.480202	0.444297
ENSG00000111530	CAND1	0.409692	0.399136	0.561593	0.408074	0.31513	0.0465728	0.423674	0.420145	0.330011	0.374344	0.39356	0.380217	0.32554	0.439913	0.425268	0.32567	0.167441	0.302575	0.341109	0.284833	0.405493	0.361118
ENSG00000236279	CLEC2L	0.409546	0.444265	0.651259	0.156252	0.657976	0.308773	0	0.46722	0.240235	0.450372	0	0.263968	0.40627	0.743659	0.460855	0.319209	0.00235686	0.0989153	0.414017	0.556741	0.555556	0.430025
ENSG00000188191	PRKAR1B	0.409533	0.453651	0.452476	0.452727	0.432491	0.253267	0.417946	0.4595	0.466908	0.449505	0.463875	0.440269	0.376452	0.460348	0.468249	0.469884	0.415413	0.449975	0.424431	0.442375	0.452186	0.463875
ENSG00000024862	CCDC28A	0.409447	0.42541	0.377264	0.349079	0.332249	0.142365	0.199825	0.525902	0.508529	0.341616	0.489009	0.566496	0.322062	0.426377	0.406897	0.266778	0.223552	0.292714	0.396472	0.401257	0.414258	0.161203
ENSG00000178773	CPNE7	0.409261	0	0	0	0	0	0.817961	0	0.30304	0.133393	0.0284762	0	0	0	0.127211	0.395816	0.782383	0.821814	0.891804	0.374067	0	0.584856
ENSG00000084710	EFR3B	0.409134	0.561866	0.582658	0.328584	0.611361	0.329387	0.464095	0.580686	0.173833	0.403489	0.508311	0.259774	0.438472	0.580536	0.383453	0.213521	0.193087	0.321569	0.512161	0.277116	0.374486	0.174245
ENSG00000137261	KIAA0319	0.409077	0.49596	0.297503	0.535185	0.371954	0	0.530683	0.52394	0.0920375	0.151213	0.160848	0.179454	0.000534759	0.108787	0.286636	0.379377	0.418136	0.472351	0.374595	0.701166	0.403427	0.396344
ENSG00000090661	CERS4	0.408971	0.353229	0.289585	0.400306	0.234106	0	0.315901	0.38774	0.417388	0.423774	0.397344	0.367963	0.179813	0.324407	0.406408	0.260189	0.353271	0.364121	0.206534	0.37923	0.25978	0.419142
ENSG00000198513	ATL1	0.408886	0.370489	0.297421	0.608905	0.319886	0.14008	0.451671	0.332581	0.333922	0.220363	0.385259	0.098861	0.000802139	0.22933	0.337592	0.415856	0.248365	0.331021	0.361215	0.530958	0.269192	0.0302075
ENSG00000162873	KLHDC8A	0.408699	0.581898	0.588157	0.338676	0.672577	0.159087	0.00574926	0.622955	0.659701	0.46341	0.466738	0.472505	0.155618	0.681152	0.640692	0.507592	0	0.201894	0.209981	0.00398979	0.576588	0
ENSG00000130477	UNC13A	0.408155	0.201301	0.369431	0.111653	0.315468	0.321237	0.303068	0.265551	0.0985037	0.254466	0.292664	0	0.317481	0.381866	0.371695	0.642477	0.352676	0.397526	0.583638	0.598924	0.320093	0.423491
ENSG00000127824	TUBA4A	0.407913	0.395541	0.546992	0.401461	0.491529	0.216521	0.356494	0.513711	0.341513	0.357779	0.426553	0.342724	0.293453	0.592992	0.437351	0.587093	0.383932	0.394928	0.529039	0.501611	0.445394	0.369803
ENSG00000104361	NIPAL2	0.407579	0.358076	0.421538	0.443812	0.414003	0	0.492568	0.36568	0.382283	0.40381	0.373289	0.105448	0	0.405429	0.317909	0	0	0	0	0	0.376128	0.000649245
ENSG00000175931	UBE2O	0.406989	0.378617	0.436827	0.50431	0.42685	0.371461	0.444679	0.472581	0.358191	0.368142	0.359772	0.275247	0.33671	0.485995	0.43196	0.416039	0.271566	0.426097	0.412679	0.486191	0.430489	0.413598
ENSG00000144834	TAGLN3	0.406948	0.341265	0.350376	0.1377	0.411744	0	0	0.29036	0.380344	0.404456	0.32489	0.299044	0.168717	0.313374	0.338482	0.3247	0.326679	0.28658	0.381906	0.234717	0.32629	0.139479
ENSG00000185742	C11orf87	0.406817	0.273318	0.0829844	0.388847	0.528302	0.315008	0	0.26875	0.219084	0.009634	0	0	0	0.344245	0.116638	0.395275	0	0.349412	0.0848014	0.585154	0.179436	0.611851
ENSG00000186487	MYT1L	0.406652	0.413909	0.37683	0.407705	0.396226	0.156434	0.200871	0.399892	0.524321	0.527459	0.383015	0.386027	0.499045	0.379009	0.330753	0.513973	0.444238	0.435525	0.464079	0.421197	0.384455	0.449142
ENSG00000109991	P2RX3	0.406572	0	0.54791	0	0	0	0.0956973	0	0	0.0871882	0.112261	0	0	0	0.0927271	0.341446	0	0	0.20466	0.0270906	0	0
ENSG00000145147	SLIT2	0.40636	0.260107	0.304441	0.606949	0.313768	0	0.0605285	0.429913	0.0913902	0	0.391499	0.352222	0.178903	0.364664	0.297777	0.366935	0.78733	0.722701	0.775537	0.754977	0	0
ENSG00000204442	FAM155A	0.406311	0.448199	0.427617	0.533977	0.206371	0.308825	0.398751	0.433467	0.368672	0.420601	0.410041	0.455912	0.576202	0.501209	0.448326	0.475259	0.399432	0.452932	0.429123	0.608445	0.40616	0.504563
ENSG00000139990	DCAF5	0.405889	0.339804	0.340456	0.492372	0.104184	0	0.493563	0.182044	0.144245	0.208702	0.35138	0	0.0784091	0.38627	0.280257	0.259675	0.04639	0.326926	0.378519	0.395891	0.38026	0.39707
ENSG00000143740	SNAP47	0.405526	0.431474	0.436691	0.387892	0.393063	0.0721194	0.366953	0.431761	0.408788	0.400305	0.430772	0.384979	0.198529	0.443089	0.446092	0.369089	0.318749	0.336373	0.36359	0.36792	0.418533	0.422232
ENSG00000168993	CPLX1	0.405352	0.39254	0.676866	0.42296	0.593922	0.435215	0.287571	0.454787	0	0.431654	0.122011	0	0.433909	0.68216	0.512049	0.351875	0	0.210921	0.432319	0.460934	0.619938	0.577347
ENSG00000144406	UNC80	0.40501	0.455379	0.431501	0.591572	0.374432	0.225758	0.373509	0.517071	0.457833	0.474428	0.435687	0.394628	0.413765	0.467084	0.45889	0.460904	0.306194	0.407559	0.441013	0.576941	0.444379	0.381589
ENSG00000113163	COL4A3BP	0.404923	0.466345	0.375216	0.569383	0.141879	0.29897	0.555911	0.384093	0.203605	0.015395	0.320802	0.303974	0.0465909	0.379788	0.407205	0.0383339	0.0103472	0.290412	0.160682	0.276245	0.389217	0.194542
ENSG00000186472	PCLO	0.404752	0.387484	0.423189	0.455151	0.350382	0.326181	0.415517	0.294141	0.391546	0.428429	0.341788	0.244485	0.276411	0.418796	0.42601	0.438589	0.378147	0.390916	0.513288	0.422957	0.426894	0.75023
ENSG00000102181	CD99L2	0.404733	0.341134	0.409601	0.549959	0.361515	0.389548	0.43265	0.437757	0.301664	0.182291	0.411224	0.0934861	0.263912	0.414524	0.422531	0.310757	0.137319	0.318019	0.226066	0.416628	0.432039	0.297243
ENSG00000104497	SNX16	0.404623	0.392974	0.307696	0.39192	0.275444	0.0393188	0.391579	0.249242	0.262804	0.344047	0.0467869	0.0407602	0.140997	0.270821	0.184771	0.195863	0.00919752	0.166224	0.166929	0.299609	0.285676	0.16024
ENSG00000022355	GABRA1	0.404395	0.729213	0.861805	0.371131	0.33281	0	0	0.675507	0.724465	0.866926	0.434788	0.537411	0.764055	0.745173	0.63221	0.529906	0	0.149631	0.0806141	0.75417	0.681224	0.552432
ENSG00000101298	SNPH	0.40434	0.398471	0.610467	0.416205	0.581012	0.413108	0.376783	0.631764	0.223896	0.368009	0.391665	0.200495	0.343602	0.652955	0.453268	0.44078	0.416877	0.451481	0.594653	0.604739	0.433205	0.371941
ENSG00000114631	PODXL2	0.404025	0.482925	0.46642	0.420261	0.402721	0.140875	0.36449	0.473258	0.473276	0.471548	0.553792	0.46251	0.369478	0.469036	0.474346	0	0	0	0.2508	0.179933	0.445383	0.409624
ENSG00000005884	ITGA3	0.403821	0.379624	0.299352	0.525927	0.568566	0	0.398141	0.418496	0.309166	0.391501	0.167314	0.392028	0	0.395017	0.359477	0	0	0	0.0878492	0.320738	0.391635	0.316642
ENSG00000155744	FAM126B	0.403506	0.537019	0.598196	0.582067	0.405355	0.322848	0.35862	0.457538	0.327928	0.407626	0.402183	0.375052	0.306735	0.584269	0.441547	0.404799	0.34793	0.444387	0.428951	0.525951	0.432573	0.438493
ENSG00000151320	AKAP6	0.40298	0.394974	0.37571	0.507015	0.275103	0.166473	0.441661	0.400478	0.321397	0.363189	0.369768	0.378184	0.363838	0.432137	0.347955	0.437517	0.387762	0.41968	0.42952	0.386224	0.373168	0.375065
ENSG00000132563	REEP2	0.402806	0.370292	0.41314	0.440988	0.381914	0	0.381769	0.434522	0.359943	0.343864	0.389145	0.332122	0.157516	0.430121	0.377965	0.441425	0.261774	0.393206	0.428015	0.579566	0.363408	0.394372
ENSG00000185519	FAM131C	0.402319	0.441039	0.828136	0.218166	0.833061	0.618417	0.0159032	0.457107	0.457962	0.213722	0.340338	0.269748	0	0.721548	0.586119	0	0	0	0	0	0.633725	0.404607
ENSG00000171951	SCG2	0.402272	0.476839	0.461601	0.478574	0.407982	0.29216	0.490205	0.450867	0.488206	0.485649	0.456328	0.476081	0.442498	0.435929	0.462414	0	0.0501265	0	0	0.245442	0.478457	0.43504
ENSG00000100321	SYNGR1	0.402002	0.42151	0.440381	0.380834	0.408601	0.244067	0.35449	0.41365	0.337587	0.317178	0.351095	0.275173	0.181083	0.448355	0.430296	0.358288	0.285451	0.412483	0.426914	0.491933	0.424452	0.404802
ENSG00000154917	RAB6B	0.401951	0.381981	0.426054	0.360442	0.428859	0.0925147	0.357738	0.383815	0.329826	0.359103	0.286192	0.264128	0.210896	0.414137	0.412692	0.453487	0.354716	0.421008	0.487493	0.492242	0.420691	0.447791
ENSG00000134121	CHL1	0.4019	0.410127	0.342329	0.622606	0	0.3031	0.42742	0.0681696	0.307511	0.204123	0.399776	0.0881111	0	0.141802	0.280305	0.301597	0.256997	0.422235	0.0708172	0.406636	0.327338	0.372327
ENSG00000109265	KIAA1211	0.401844	0.319284	0.376459	0.590519	0.306412	0.216258	0.584821	0.32287	0.369999	0.416714	0.439581	0.319777	0.0824198	0.389251	0.371789	0	0.257467	0.366431	0.444216	0	0.405876	0.561865
ENSG00000134115	CNTN6	0.401742	0.405644	0.431097	0.154575	0.0444605	0.0550562	0.341265	0.401222	0.753813	0.915503	0.314891	0.563421	0.7469	0.199008	0.25449	0.433446	0.29795	0.309627	0	0.814638	0.13732	0.254362
ENSG00000007402	CACNA2D2	0.40158	0.577687	0.682104	0.630332	0.443612	0.419994	0.136833	0.486625	0.470232	0.463823	0.47944	0.465167	0.604535	0.692705	0.675204	0	0	0	0	0.159244	0.710824	0
ENSG00000196227	FAM217B	0.401351	0.48464	0.559432	0.464029	0.35873	0	0.380682	0.509281	0.542533	0.591806	0.416195	0.330824	0.60231	0.518389	0.447169	0.408047	0.378787	0.449754	0.415066	0.494721	0.49441	0.442223
ENSG00000124493	GRM4	0.401204	0	0.0594508	0.499762	0.284446	0	0.534586	0.567457	0	0.408249	0.43166	0.162108	0.280284	0.277684	0	0	0	0	0	0.250102	0	0
ENSG00000118276	B4GALT6	0.401003	0.374987	0.378194	0.391312	0.362078	0	0.371361	0.419503	0.359618	0.422503	0.415762	0.334014	0.300718	0.422995	0.413734	0.450265	0.333684	0.414768	0.446165	0.455876	0.414822	0
ENSG00000163032	VSNL1	0.400539	0.463812	0.489974	0.405869	0.451777	0.281974	0.378166	0.530687	0.428511	0.397448	0.451271	0.453392	0.441104	0.467899	0.457956	0.447289	0.375937	0.407586	0.410979	0.446528	0.455789	0.338355
ENSG00000197959	DNM3	0.400517	0.405035	0.440359	0.600285	0.302525	0.0313288	0.394559	0.34908	0.360132	0.516516	0.417763	0.330719	0.0754011	0.443801	0.424853	0	0	0.0307335	0	0	0.439759	0.447183
ENSG00000111641	NOP2	0.400398	0.14802	0	0	0.0809249	0	0.0726076	0	0.169641	0	0	0.0654163	0	0.0901621	0	0.162191	0	0	0.205531	0.332668	0.126526	0.279221
ENSG00000241878	PISD	0.399816	0.382265	0.3228	0.32852	0.296763	0	0	0.437755	0.309719	0.0349051	0.379322	0.380541	0.344497	0.334315	0.358237	0.0193285	0	0	0.198567	0.191417	0.349237	0.200316
ENSG00000119242	CCDC92	0.399683	0.460585	0.460048	0.432746	0.425856	0.173946	0.432058	0.545478	0.396253	0.395758	0.449129	0.444194	0.368205	0.47198	0.448144	0.169361	0	0.266807	0.333779	0.31637	0.417135	0.385401
ENSG00000167378	IRGQ	0.399619	0.315121	0.437253	0.336196	0.399444	0.345277	0.365123	0.395812	0.122277	0.276826	0.24017	0.116525	0.126136	0.372774	0.427857	0.397363	0.0727283	0.423354	0.412815	0.420596	0.422388	0.489577
ENSG00000272333	KMT2B	0.399466	0	0	0.219391	0.153182	0	0.235114	0.214936	0	0	0	0	0	0.0840239	0.203333	0.181498	0.312417	0.176358	0.195197	0.286274	0.105519	0.0123357
ENSG00000166405	RIC3	0.399121	0.37067	0.392092	0.303632	0.100627	0.188105	0.362412	0.393678	0.316527	0.26897	0.330034	0.39047	0.168771	0.409135	0.373654	0.368478	0.264967	0.253461	0.370351	0.422979	0.39735	0.409235
ENSG00000119772	DNMT3A	0.398741	0.128662	0.336793	0.0843103	0.320188	0.189264	0	0.111101	0	0.227138	0.0318489	0	0.173061	0.295759	0.0320417	0.152547	0	0.0766529	0.12293	0.00105915	0.325151	0
ENSG00000106236	NPTX2	0.398379	0.00782986	0	0.0826724	0	0	0	0.383005	0.1756	0.123821	0.839498	0.817398	0	0	0	0.822125	0.394725	0.33734	0	0	0	0
ENSG00000144815	NXPE3	0.398051	0.326223	0.385216	0.521733	0.0961131	0.631833	0.616217	0.666994	0.135907	0.336482	0.352482	0.274172	0.50851	0.40011	0.228479	0.17893	0.0812455	0	0.122043	0.38135	0.180059	0.303418
ENSG00000122679	RAMP3	0.397612	0	0	0	0	0.630475	0	0	0	0	0.0124238	0.00838239	0	0	0	0	0	0	0	0.775231	0	0
ENSG00000112584	FAM120B	0.397442	0.411627	0.376429	0.511619	0.428098	0.323738	0.335318	0.477426	0.357714	0.362284	0.341846	0.185967	0.393664	0.431526	0.538428	0.304041	0.0319614	0.345491	0.194809	0.34306	0.347946	0.218258
ENSG00000111371	SLC38A1	0.397347	0.555357	0.60035	0.481534	0.408948	0.387767	0.441276	0.465638	0.363482	0.409283	0.428063	0.342911	0.309589	0.615519	0.506165	0.0297243	0	0.0291322	0.149526	0.345367	0.515979	0.467435
ENSG00000047056	WDR37	0.397197	0.427222	0.580382	0.583418	0.365142	0	0.487652	0.405231	0.396365	0.434395	0.426393	0.325285	0.344066	0.51078	0.545911	0.215113	0.0263279	0.290235	0.222192	0.19982	0.445964	0.430611
ENSG00000153253	SCN3A	0.397097	0.455791	0.337769	0.589098	0	0.0303827	0.461924	0.210731	0.46544	0.412232	0.432256	0.45627	0.270889	0.0939839	0.431703	0.459472	0.216844	0.194665	0.356494	0.239639	0.455821	0.418239
ENSG00000163577	EIF5A2	0.396549	0.372459	0.397524	0.650477	0.365226	0.474877	0.522009	0.296265	0	0.210359	0.0189309	0	0	0.481387	0.331173	0.0568003	0	0.111905	0.273603	0.242989	0.314706	0.409173
ENSG00000108599	AKAP10	0.396499	0	0.289426	0	0.022447	0	0.127242	0.00766265	0	0	0	0.130798	0	0	0.170302	0	0.0102447	0	0.00706506	0.0674753	0	0.0314478
ENSG00000067445	TRO	0.396326	0.554849	0.45441	0.514525	0.346079	0.105331	0.41184	0.475249	0.566192	0.436766	0.503255	0.466556	0.42658	0.456819	0.533713	0.43177	0.338848	0.39238	0.446567	0.424757	0.46724	0.436435
ENSG00000104381	GDAP1	0.395814	0.423037	0.438486	0.637815	0.311551	0.359863	0.497474	0.425433	0.270403	0.39532	0.348786	0.280988	0.373479	0.436775	0.413704	0.41787	0.352515	0.432952	0.412466	0.386066	0.399352	0.430308
ENSG00000100934	SEC23A	0.39552	0.402226	0.408091	0.376259	0.347422	0	0.430079	0.39618	0.327622	0.344038	0.307885	0.374965	0.114238	0.408903	0.44252	0.400279	0.329877	0.413747	0.430505	0.389475	0.431212	0.404258
ENSG00000136425	CIB2	0.395392	0.454286	0.456457	0.350434	0.454527	0	0.398192	0.432939	0.608559	0.477196	0.505947	0.466999	0	0.453424	0.515706	0	0.395025	0.0422521	0.40323	0	0.453227	0.37975
ENSG00000103034	NDRG4	0.395347	0.444715	0.440423	0.3297	0.410872	0.244113	0.268663	0.421082	0.412478	0.440481	0.388426	0.356893	0.398059	0.446566	0.434407	0.440364	0.346065	0.365818	0.423966	0.421524	0.440474	0.398143
ENSG00000155265	GOLGA7B	0.395329	0.274692	0.282722	0.400801	0.642915	0.145115	0.407525	0.636106	0.418614	0.36354	0.509531	0.458751	0.279829	0.40453	0.433651	0.534946	0.347901	0.422759	0.510624	0.43082	0.28137	0.205024
ENSG00000154059	IMPACT	0.395011	0.650861	0.657588	0.637173	0.390232	0.376359	0.451971	0.47536	0.476023	0.409024	0.586334	0.467589	0.283457	0.554948	0.667827	0.220019	0.161474	0.416357	0.310246	0.373134	0.572907	0.461175
ENSG00000089199	CHGB	0.394622	0.415181	0.426094	0.248039	0.445259	0.303895	0.448344	0.397972	0.343406	0.420003	0.310565	0.14794	0.323933	0.430284	0.413385	0.580464	0.181022	0.173187	0.551824	0.419124	0.38116	0.327168
ENSG00000182674	KCNB2	0.393765	0.330564	0.327427	0.439819	0.113106	0.461197	0.384406	0.431505	0.199059	0	0.031661	0.303328	0	0.397296	0.288068	0.157315	0	0.441563	0.339727	0.419361	0.419619	0.450036
ENSG00000142686	C1orf216	0.393484	0.30416	0.453989	0.391037	0.37928	0.344845	0.226879	0.432183	0.289842	0.494949	0.32916	0.0973114	0.21648	0.416187	0.286294	0.403713	0.248635	0.364377	0.38375	0.332946	0.348815	0.37179
ENSG00000111912	NCOA7	0.393275	0.293639	0.347573	0.551819	0.358277	0.376313	0.378926	0.385349	0.353991	0.365272	0.430495	0.397691	0.177421	0.30316	0.411511	0.423605	0.415825	0.432549	0.441798	0.366815	0.385245	0.419935
ENSG00000116273	PHF13	0.393091	0.170168	0.0482247	0.14907	0	0.149096	0.291635	0.248694	0.0993416	0	0.18737	0.460158	0	0.216534	0	0.238262	0	0.203948	0.0501545	0.206443	0.149819	0.0134313
ENSG00000120341	SEC16B	0.392874	0	0.165536	0	0.836286	0	0.0979228	0	0.00843984	0.290217	0	0	0	0	0	0.189532	0	0.363949	0.563129	0	0	0
ENSG00000149260	CAPN5	0.392821	0	0.0859932	0.108205	0.516644	0	0.377143	0	0	0.0560612	0.160336	0.0347453	0	0.0293164	0.00936103	0	0.0806828	0.444513	0.47795	0	0.124899	0.415329
ENSG00000166676	TVP23A	0.392155	0.384103	0.629032	0.297713	0.29783	0	0.303358	0.410402	0.231377	0.017622	0.362753	0.217074	0	0.502206	0.408747	0.335887	0.0774374	0.379191	0.342357	0.480367	0.557342	0.466948
ENSG00000136854	STXBP1	0.391889	0.440888	0.433265	0.404534	0.405393	0.229605	0.319557	0.435388	0.434109	0.433373	0.438839	0.373147	0.397188	0.443925	0.44749	0.438674	0.365689	0.400716	0.419837	0.41023	0.434169	0.400725
ENSG00000128596	CCDC136	0.391583	0.429255	0.430042	0.386911	0.436997	0.395448	0.392955	0.462516	0.355769	0.434607	0.420077	0.371892	0.0600936	0.464724	0.462616	0.00596797	0	0.151803	0	0.216407	0.444245	0.399253
ENSG00000003096	KLHL13	0.391355	0.417523	0.391756	0.40117	0.219355	0	0.0118694	0.393056	0.41441	0.438996	0.392348	0.105768	0	0.189153	0.264483	0.289913	0.228766	0	0	0	0.435911	0.1414
ENSG00000137802	MAPKBP1	0.391133	0.0610213	0.197448	0.0814643	0.277678	0	0	0.133113	0.24273	0.404014	0	0.0603982	0.357538	0.438411	0.192266	0.497093	0.281971	0.351882	0.507334	0.119962	0.113871	0.177461
ENSG00000102678	FGF9	0.391089	0.472037	0.711697	0	0.420309	0	0	0.56317	0.207844	0.58342	0.251059	0.243193	0.554723	0.714447	0.404295	0.223202	0	0	0.190669	0.402322	0.413308	0.524579
ENSG00000174282	ZBTB4	0.390947	0.380398	0.38723	0.326941	0.32429	0.120164	0.306628	0.382079	0.00968732	0.0594016	0.0482901	0.00435116	0.115508	0.423163	0.397307	0.144843	0.049954	0.0583161	0.265455	0.312191	0.364929	0.472745
ENSG00000166747	AP1G1	0.390931	0.231659	0.351534	0.367099	0.28149	0	0.383612	0.282505	0.234421	0.226229	0.403421	0.112234	0.309797	0.386729	0.380564	0.31567	0.129885	0.2113	0.3096	0.260461	0.372976	0.344508
ENSG00000072201	LNX1	0.390828	0.371502	0.379802	0.171824	0.303886	0	0.290219	0.59767	0.249486	0.3773	0.223481	0.452747	0.424717	0.392059	0.311074	0.370674	0	0.0186688	0.278307	0	0.12135	0.359468
ENSG00000091656	ZFHX4	0.390738	0.414863	0.600628	0.654283	0	0	0.650167	0.110864	0.85303	0.834159	0.599795	0.263034	0.648021	0.734019	0.540652	0	0	0	0	0	0.0417994	0
ENSG00000119899	SLC17A5	0.390694	0.11388	0.0495082	0.0393489	0.266416	0	0.00639837	0.0429313	0	0.00324361	0.162831	0	0.331636	0.0977774	0.191441	0.264677	0.343411	0	0.393983	0.450458	0.149218	0.040666
ENSG00000099365	STX1B	0.390633	0.453344	0.62146	0.613899	0.548454	0.392832	0.393997	0.577124	0.433099	0.448961	0.505252	0.411807	0.441892	0.647121	0.63858	0.43024	0.339262	0.411504	0.441055	0.483029	0.483071	0.444978
ENSG00000182013	PNMA8A	0.390409	0.396845	0.355972	0.342918	0	0	0.43492	0.369464	0.566069	0.446057	0.449788	0.342244	0.24426	0.363026	0.425365	0.459352	0.431251	0.433823	0.419843	0.429712	0.438179	0.430998
ENSG00000153012	LGI2	0.390394	0.4289	0.671359	0.410903	0.561991	0.703339	0.220115	0.67406	0.0119413	0.500621	0.0230177	0.311967	0.483247	0.793856	0.499575	0.415953	0	0	0.194914	0.380564	0.697874	0.704185
ENSG00000165995	CACNB2	0.390299	0.491924	0.360901	0.372018	0.0240366	0	0.288497	0.583775	0.294027	0.483524	0.407184	0.392672	0.389741	0.347196	0.239565	0.284769	0.287092	0.274255	0.350383	0	0.377693	0.282458
ENSG00000183571	PGPEP1L	0.390251	0	0.668979	0	0	0	0	0	0.909287	0	0.320305	0.495191	0	0	0.766128	0	0	0	0.624053	0	0	0
ENSG00000185737	NRG3	0.390062	0.362445	0.295475	0.63073	0.227136	0	0.355466	0.301358	0.194557	0.259905	0.184868	0.122974	0	0.0317911	0.367776	0.559299	0.328981	0.56009	0.520097	0.455262	0.230422	0.0877792
ENSG00000118733	OLFM3	0.389704	0.791236	0.720039	0.631829	0	0	0.0329191	0.658686	0	0	0.431526	0.403557	0	0.443698	0.413502	0	0	0	0	0	0.533469	0
ENSG00000169435	RASSF6	0.38938	0.0919291	0.763616	0.00501363	0.447871	0	0.0867953	0.319612	0.305187	0.495921	0.0929551	0	0.843957	0.801008	0	0	0.374003	0	0	0.0650734	0.125032	0
ENSG00000040341	STAU2	0.389302	0.382481	0.434592	0.443241	0.432891	0.26892	0.429945	0.436841	0.394986	0.368042	0.42926	0.273294	0.252529	0.448614	0.456168	0.400257	0.358136	0.428372	0.433036	0.417337	0.447058	0.433233
ENSG00000057019	DCBLD2	0.389199	0.173839	0.309618	0.329001	0.0410405	0	0.0480805	0.340931	0	0.0792661	0.0903765	0	0	0.378342	0.394475	0.270643	0	0	0	0.0248907	0.36595	0
ENSG00000162927	PUS10	0.38917	0.166498	0	0	0.10501	0	0.130598	0.0531615	0	0.125484	0	0	0.276	0	0	0.438078	0	0	0.0114439	0.185995	0	0
ENSG00000083457	ITGAE	0.389002	0.5007	0.141917	0	0.469968	0	0	0.870938	0	0.190997	0.20695	0.185182	0	0.552702	0	0.000822626	0	0	0.0954151	0	0	0
ENSG00000159164	SV2A	0.388918	0.410799	0.450578	0.372063	0.352412	0.23791	0.285573	0.399327	0.364039	0.333111	0.403475	0.336093	0.268575	0.487678	0.452643	0.276942	0.206484	0.261332	0.306558	0.387826	0.401404	0.414558
ENSG00000119900	OGFRL1	0.388891	0.134421	0.193054	0.105754	0	0	0	0.196848	0.274489	0.408644	0.0528467	0.134502	0.334084	0.19913	0.228384	0.428657	0.431881	0.405072	0.639024	0.383801	0.124204	0.563555
ENSG00000169018	FEM1B	0.388474	0.361389	0.431023	0.357903	0.400186	0	0.425254	0.297417	0.371656	0.334643	0.360056	0.234102	0.170915	0.378983	0.365852	0.318082	0.116751	0.325676	0.420045	0.297452	0.453141	0.381368
ENSG00000125166	GOT2	0.388444	0.433312	0.562977	0.266287	0.555352	0.110177	0.18133	0.507179	0.257121	0.35567	0.312993	0.320341	0.38229	0.627599	0.44916	0.357474	0.0903081	0.324277	0.409919	0.463121	0.446802	0.437582
ENSG00000185565	LSAMP	0.388332	0.0229339	0.100299	0.366225	0.120405	0.162742	0.119243	0.345179	0.394401	0.228809	0.418015	0.387776	0.200535	0.323866	0.314292	0.260436	0	0.0965393	0.471348	0	0.250951	0.150243
ENSG00000188636	RTL6	0.387913	0.208376	0.238679	0.140648	0.295231	0.0875958	0.18564	0.347194	0.409485	0.157397	0.297165	0.23438	0.195314	0.31818	0.316602	0.517491	0.476237	0.390658	0.548915	0.391626	0.310997	0.296864
ENSG00000129910	CDH15	0.387212	0	0.0313092	0.150542	0.25877	0	0.182835	0.293934	0.72678	0.358499	0.729441	0.295888	0.31197	0	0.223454	0.242911	0	0.367914	0.0698381	0	0.282508	0
ENSG00000164070	HSPA4L	0.387164	0.574715	0.618864	0.55962	0.433449	0.312391	0.404386	0.60524	0.441711	0.454109	0.441923	0.407163	0.40234	0.639776	0.500921	0.250915	0.156473	0.311671	0.353632	0.394512	0.461869	0.449762
ENSG00000107742	SPOCK2	0.387115	0.397927	0.409857	0.41207	0.420841	0.235055	0.3324	0.410219	0.401319	0.377754	0.400072	0.360472	0.224254	0.44203	0.398251	0.388154	0.249517	0.338499	0.377021	0.37561	0.390121	0.473195
ENSG00000075340	ADD2	0.386912	0.430629	0.427388	0.347777	0.509827	0.100395	0.278028	0.405194	0.42923	0.448942	0.395713	0.31834	0.34165	0.422899	0.41457	0.460422	0.407048	0.380261	0.4539	0.514106	0.448431	0
ENSG00000184785	SMIM10	0.386815	0.518012	0.44015	0.467073	0.48458	0	0.402083	0.497435	0.549652	0.424178	0.619052	0.465194	0.020254	0.443489	0.639713	0.420508	0.342744	0.389778	0.452364	0.339452	0.47244	0.21697
ENSG00000091157	WDR7	0.386738	0.388574	0.550248	0.540127	0.309607	0	0.420948	0.509049	0.382209	0.357127	0.49529	0.282485	0.290241	0.427795	0.426268	0.457717	0.366769	0.496994	0.563354	0.409891	0.383577	0.400934
ENSG00000078053	AMPH	0.386677	0.192798	0.130067	0.544207	0.42051	0	0.378755	0.292937	0.186995	0.0436193	0.31395	0.0804965	0.0486631	0.08666	0.161477	0.448751	0.324514	0.479034	0.606047	0.292332	0.117831	0.41961
ENSG00000130822	PNCK	0.386601	0.461795	0.391886	0.416748	0	0	0.339094	0.45193	0.652572	0.463127	0.633341	0.467073	0.387038	0.340464	0.470894	0.412315	0.446975	0.344099	0.420652	0.00472544	0.447661	0.115675
ENSG00000069424	KCNAB2	0.386344	0.414421	0.583474	0.360478	0.61194	0.439386	0.0192946	0.608769	0.336694	0.406053	0.392304	0.214323	0.451432	0.670795	0.381106	0.445942	0.258877	0.311595	0.600575	0.534187	0.448289	0.330497
ENSG00000163904	SENP2	0.386175	0.361137	0.369387	0.160892	0.315543	0	0.156661	0.417406	0.205632	0.384728	0.291196	0.273512	0.346734	0.499335	0.34324	0.431418	0.235552	0.384583	0.362723	0.387681	0.378877	0.263901
ENSG00000198833	UBE2J1	0.386149	0.427991	0.417155	0.409448	0.37278	0	0.413517	0.39781	0.152881	0.282713	0.392929	0.243353	0.326455	0.549372	0.439364	0.224708	0.0597839	0.253658	0.321012	0.280017	0.400754	0.385851
ENSG00000184524	CEND1	0.386009	0.45304	0.51887	0.399398	0.454182	0.280623	0.325653	0.453968	0.407873	0.438106	0.406186	0.412247	0.330277	0.534788	0.462985	0.352276	0.192343	0.286086	0.402237	0.396018	0.464637	0.454336
ENSG00000169122	FAM110B	0.385995	0.0709234	0.0646433	0	0.412475	0	0	0.135149	0.361188	0.338085	0.381464	0	0.159486	0.212218	0.263966	0.357153	0.162078	0.13477	0.341695	0.227772	0.335252	0.147786
ENSG00000213047	DENND1B	0.385915	0.254681	0.26129	0.30154	0.143924	0.0530337	0.104917	0.385918	0.253349	0.239932	0.31047	0	0.482783	0.336615	0.191505	0	0	0.00281385	0.0908084	0.350075	0.0843299	0.112273
ENSG00000135472	FAIM2	0.385784	0.531854	0.498084	0.534616	0.403977	0.134987	0.306405	0.588845	0.451528	0.444051	0.530654	0.445371	0.318515	0.532929	0.493235	0.40887	0.348736	0.376072	0.380985	0.432792	0.425022	0.412279
ENSG00000183597	TANGO2	0.385493	0.4096	0.504342	0.401349	0.371485	0.238575	0.36358	0.537755	0.438065	0.439052	0.464809	0.396899	0.439332	0.492713	0.455436	0.362579	0.347067	0.315762	0.386815	0.359232	0.427413	0.352319
ENSG00000067840	PDZD4	0.385392	0.385439	0.37847	0.335587	0.329758	0	0.272587	0.0721736	0.345874	0.399266	0.202212	0.360485	0.268411	0.350414	0.283227	0.569915	0.399629	0.415353	0.535621	0.380202	0.391248	0.385896
ENSG00000080561	MID2	0.385349	0.595277	0.339414	0.652212	0	0	0.593646	0.276051	0.294142	0.244594	0.300832	0.386508	0.284603	0.395853	0.525823	0.120921	0.0172465	0	0	0	0.377131	0.389458
ENSG00000104756	KCTD9	0.385343	0.634273	0.798413	0.408552	0.529318	0.350079	0.430985	0.654001	0	0.158348	0.317643	0.159948	0	0.811943	0.683583	0	0	0	0	0.00642356	0.594343	0.167708
ENSG00000166206	GABRB3	0.385022	0.306812	0.340888	0.376285	0	0.343649	0.308344	0.421698	0.42364	0.356333	0.416463	0.388405	0.376462	0.338048	0.249303	0.638434	0.435997	0.485425	0.632683	0.597429	0.313464	0.448718
ENSG00000103249	CLCN7	0.384952	0.207587	0.272039	0	0.0836441	0.0231461	0.160413	0.292257	0.046221	0	0.243991	0.211516	0	0.319022	0.0997972	0.256882	0.0721977	0	0.325582	0.542573	0.120568	0.175206
ENSG00000139220	PPFIA2	0.384703	0.0724894	0.0454376	0.264377	0	0.230642	0.363933	0.0447728	0.398202	0.406553	0.161187	0	0	0.0223303	0.324632	0.59913	0.418857	0.376279	0.631599	0.442005	0.376456	0.350975
ENSG00000175893	ZDHHC21	0.384702	0.387745	0.354503	0.29512	0.352889	0	0.322749	0.375158	0.120972	0.0683095	0.231505	0.23272	0	0.365347	0.275054	0.323536	0.254843	0.341984	0.322731	0.390064	0.393476	0.292702
ENSG00000101290	CDS2	0.384685	0.398919	0.411429	0.385167	0.312473	0.175988	0.331745	0.406057	0.290073	0.297812	0.350192	0.352018	0.203008	0.411076	0.431451	0.332803	0.142447	0.208941	0.372308	0.399943	0.397693	0.402356
ENSG00000167778	SPRYD3	0.384231	0.374028	0.327341	0.357942	0.370456	0.284953	0.356189	0.397542	0.40107	0.371222	0.420575	0.315967	0.130214	0.364358	0.412102	0.414912	0.3689	0.37303	0.431252	0.322835	0.345301	0.413808
ENSG00000036257	CUL3	0.384197	0.327481	0.359672	0.496359	0.171969	0.343448	0.394596	0.297542	0.152408	0.13155	0.117674	0	0.120388	0.320344	0.316948	0.279001	0	0.0919102	0.302038	0.227639	0.301351	0.227673
ENSG00000177432	NAP1L5	0.38415	0.510431	0.44223	0.424794	0.388163	0.234756	0.346082	0.419828	0.470774	0.45006	0.455782	0.436287	0.375336	0.435549	0.456967	0	0.0214417	0.143233	0	0.153398	0.448228	0.431811
ENSG00000173442	EHBP1L1	0.384092	0.232988	0	0.0353824	0.170487	0	0.353504	0	0.408906	0	0.408515	0.278786	0	0	0.289072	0.421541	0.388329	0.377925	0.00421619	0.193378	0.060023	0.0671692
ENSG00000183715	OPCML	0.384043	0.374171	0.346864	0.0918327	0.235639	0	0.268082	0.330341	0.134136	0.000193648	0.291796	0.186588	0.54363	0.370933	0.387146	0.457891	0.480592	0.543098	0.593024	0.623803	0.315519	0.391168
ENSG00000006432	MAP3K9	0.383966	0.373175	0.643364	0.327918	0.497188	0	0.412012	0.384648	0	0.352172	0.148095	0.415781	0.322543	0.547545	0.441061	0.293468	0	0.462054	0.16586	0.626184	0.453685	0.568449
ENSG00000241945	PWP2	0.383934	0.0455478	0.155946	0.239835	0.0066474	0	0.138824	0.339167	0	0.160693	0.36638	0	0	0.285289	0.126503	0.358863	0.371604	0.0021645	0.430485	0.397048	0.29102	0.0717006
ENSG00000167114	SLC27A4	0.383825	0.286491	0.570348	0.46258	0.480487	0	0.22561	0.517873	0.083685	0.144738	0.29124	0.0255951	0.0907086	0.600561	0.373282	0.114098	0.240296	0.102925	0.224512	0.500225	0.439493	0.301224
ENSG00000084731	KIF3C	0.383728	0.496508	0.452491	0.28052	0.404957	0.188892	0.304325	0.388519	0.335991	0.366877	0.401425	0.253467	0.0624332	0.430675	0.393359	0.396343	0.359828	0.405254	0.439505	0.387241	0.424207	0.382135
ENSG00000123643	SLC36A1	0.383703	0.440889	0.627261	0.329727	0.527538	0.153864	0.397656	0.444825	0	0	0.171372	0.0319299	0.319463	0.605805	0.416274	0.227182	0.407708	0.468015	0.397149	0.573567	0.536284	0.246063
ENSG00000166111	SVOP	0.383683	0.37481	0.426857	0.554371	0.416364	0.0520395	0.415002	0.440903	0.503569	0.362613	0.456757	0.416168	0.330682	0.436332	0.451389	0.548284	0.370958	0.514986	0.567602	0.637497	0.413589	0.438545
ENSG00000204390	HSPA1L	0.383592	0	0	0	0	0	0	0	0	0	0	0	0	0	0	0.118865	0	0	0.317383	0	0	0
ENSG00000174373	RALGAPA1	0.383355	0.338412	0.370412	0.242219	0.305155	0.224705	0.355889	0.239707	0.2679	0.299296	0.286759	0.0136934	0.155545	0.382969	0.252602	0.342858	0.072143	0.191423	0.324807	0.397482	0.379823	0.358104
ENSG00000006210	CX3CL1	0.383277	0.423816	0.410106	0.314844	0.336687	0.168629	0	0.420936	0.503525	0.422551	0.408167	0.301275	0.488021	0.422722	0.375633	0.636547	0.421472	0.477638	0.551321	0.77519	0.409156	0.27987
ENSG00000101098	RIMS4	0.383163	0.415309	0.623161	0.362172	0.600702	0.382863	0.187226	0.441286	0.371617	0.49161	0.301726	0.199926	0.423298	0.581951	0.420132	0.274933	0	0.250359	0.143678	0.430204	0.57027	0.377844
ENSG00000134313	KIDINS220	0.383071	0.361211	0.387676	0.390027	0.166947	0	0.394976	0.386197	0.313962	0.212036	0.306659	0.255383	0.153676	0.35978	0.38536	0.216296	0.0289147	0.138813	0.310348	0.202877	0.346106	0.409691
ENSG00000242173	ARHGDIG	0.382915	0.442751	0.400769	0.400588	0.439856	0	0.409525	0.395761	0.476974	0.44888	0.471299	0.46151	0.285866	0.307545	0.472995	0.430209	0.436955	0.45505	0.470216	0.466341	0.457247	0.461769
ENSG00000153933	DGKE	0.382827	0.383693	0.572338	0.35848	0.336796	0.275299	0.365122	0.419114	0.22531	0.0271108	0.37426	0.0451753	0.500153	0.453586	0.403152	0.594793	0.209187	0.469217	0.562463	0.553494	0.394525	0.308839
ENSG00000156395	SORCS3	0.382784	0.326407	0.341328	0.353005	0	0	0.59519	0.381121	0.550389	0	0.399429	0.389394	0.00995989	0.267836	0.406828	0.36568	0	0.462648	0.305275	0.113997	0.597282	0.893041
ENSG00000170091	HGNC:24955	0.382629	0.424886	0.384277	0.368207	0.355487	0.161585	0.258977	0.379416	0.44495	0.431113	0.404056	0.354193	0.366485	0.394681	0.423132	0.440542	0.358139	0.391234	0.430121	0.428476	0.41271	0.405823
ENSG00000072062	PRKACA	0.382626	0.378296	0.394526	0.383987	0.412683	0	0.387957	0.382284	0.401275	0.379031	0.4286	0.323179	0.0576872	0.428343	0.444993	0.228133	0.289932	0.300244	0.311723	0.27812	0.391723	0.411804
ENSG00000102230	PCYT1B	0.382447	0	0	0.0216474	0.450345	0	0.0643179	0	0	0	0	0	0	0.118567	0.0815404	0.46785	0.39289	0.120292	0.492146	0	0.0263623	0.158205
ENSG00000125827	TMX4	0.382298	0.442724	0.439754	0.601589	0.28	0.290203	0.434613	0.430803	0.450873	0.336433	0.46124	0.43104	0.324789	0.443231	0.461812	0.367242	0.246856	0.340739	0.26542	0.414751	0.438918	0.358195
ENSG00000132294	EFR3A	0.382059	0.406481	0.396068	0.422728	0.656323	0.532762	0.282313	0.420163	0.00666603	0.304752	0.356817	0.223769	0.155414	0.44974	0.431212	0.303004	0.304527	0.415939	0.438479	0.55161	0.360509	0.0860653
ENSG00000013392	RWDD2A	0.381771	0.59736	0.507632	0.205372	0.354419	0	0.100927	0.471957	0.62661	0.276998	0.604231	0.522651	0.23072	0.386898	0.412428	0.202997	0.435362	0.137227	0.296399	0.365749	0.424118	0
ENSG00000054356	PTPRN	0.381751	0.388725	0.36507	0.432558	0.399493	0.111228	0.426848	0.394515	0.384559	0.33212	0.417848	0.290333	0.256945	0.381385	0.428003	0.455194	0.362911	0.416256	0.447267	0.571016	0.394347	0.444715
ENSG00000179542	SLITRK4	0.38162	0.634822	0.503836	0.566131	0	0	0.392477	0.542391	0.251711	0.563671	0.3874	0.432582	0.565417	0.578581	0.566676	0.590094	0.690202	0.418167	0.335731	0.760034	0.658103	0.321336
ENSG00000186648	CARMIL3	0.381521	0.632352	0.432645	0.356638	0.41907	0.245252	0.394976	0.58292	0.438011	0.403452	0.465248	0.409622	0.0263369	0.458062	0.507055	0.11002	0	0.248888	0.361861	0.308864	0.456108	0.388919
ENSG00000183654	2020-03-11	0.381504	0.00272782	0.0447976	0	0.599282	0	0	0.103354	0	0	0.139874	0	0	0.355164	0.122647	0.260948	0	0.00965909	0.00379011	0.544766	0	0.359862
ENSG00000152402	GUCY1A2	0.381395	0	0	0.103777	0.0153661	0.321263	0.0158568	0	0	0.158607	0	0	0	0.132059	0	0.316631	0.0697229	0	0.0876141	0	0	0
ENSG00000102172	SMS	0.381306	0.438205	0.412906	0.446646	0.392466	0.257125	0.382373	0.459175	0.439609	0.446952	0.435471	0.427869	0.322799	0.443595	0.441769	0.348828	0.236231	0.375959	0.428545	0.367792	0.434194	0.542317
ENSG00000154975	CA10	0.381196	0.147358	0.349544	0.492673	0	0.0253364	0.400475	0.598617	0.631324	0.663194	0.690165	0.564506	0.497461	0.294139	0.507849	0.611394	0.449161	0.443848	0.528471	0	0.091749	0
ENSG00000253710	ALG11	0.380904	0.266953	0.286684	0.635344	0	0.477436	0.360588	0.177147	0.13427	0.192627	0.343144	0.201836	0.0493984	0.222947	0.350011	0.099605	0	0.0112013	0.238026	0.214131	0.289263	0.0904681
ENSG00000113205	PCDHB3	0.380745	0	0.428202	0.0776382	0.0109827	0	0	0.590735	0	0.221103	0	0	0.343092	0.658612	0	0	0	0	0	0.221403	0.551637	0.19009
ENSG00000108395	TRIM37	0.380568	0.400752	0.4365	0.404523	0.428844	0.352518	0.296169	0.48613	0.406715	0.475442	0.424483	0.363208	0.525009	0.495516	0.421063	0.433727	0.336277	0.35852	0.446286	0.40449	0.416742	0.320341
ENSG00000171735	CAMTA1	0.380521	0.461526	0.43859	0.398776	0.358508	0.185976	0.329368	0.433861	0.436617	0.436532	0.430878	0.401043	0.427907	0.439372	0.439451	0.287509	0.10215	0.0597624	0.396371	0.230043	0.425624	0.347953
ENSG00000115419	GLS	0.380428	0.34057	0.338833	0.427732	0.608236	0.00336417	0.388058	0.357911	0.308086	0.291387	0.279675	0.154978	0.385791	0.371875	0.342498	0.441924	0.358776	0.532117	0.567685	0.520124	0.299999	0.341743
ENSG00000147894	C9orf72	0.379985	0.391548	0.36836	0.47471	0.167361	0	0.390588	0.270183	0.0193746	0.0343726	0.139404	0.150204	0.0477273	0.366592	0.35737	0.00338826	0	0.234932	0.150273	0.0347943	0.393191	0.292716
ENSG00000124459	ZNF45	0.379925	0.0451222	0	0	0	0	0	0	0.000671398	0	0	0	0	0	0.132578	0	0	0	0	0.0329556	0	0.376662
ENSG00000163703	CRELD1	0.37949	0.204372	0.307954	0.253996	0.208898	0.0212363	0.144167	0.320891	0.0337617	0.0662277	0.187946	0.109803	0	0.314228	0.209768	0.301379	0.0979536	0.00134298	0.167226	0.377631	0.2587	0.168937
ENSG00000101132	PFDN4	0.379444	0.350068	0.228461	0.0116256	0.413221	0	0.323001	0.17977	0.283096	0.0250775	0.253349	0.274951	0.0351604	0.224682	0.385916	0.0478592	0	0.167122	0.178147	0	0.335596	0.432307
ENSG00000196632	WNK3	0.379235	0.36395	0.639353	0.566758	0.0945864	0.0941573	0.601765	0.477205	0.455507	0.363719	0.505992	0.394068	0.47452	0.451421	0.621171	0.348972	0.380527	0.298898	0.328461	0.26055	0.510227	0.463825
ENSG00000058056	USP13	0.379101	0.25699	0.45274	0.315698	0.338204	0	0.424557	0.295005	0.31744	0.433153	0.42503	0.21279	0.377361	0.378062	0.326645	0.418392	0.385097	0.370917	0	0.159513	0.392711	0.530618
ENSG00000029364	SLC39A9	0.379038	0.277509	0.438759	0.361359	0.354075	0	0.310126	0.110472	0.0888469	0	0.284556	0	0.078008	0.270329	0.346974	0.0907603	0	0.00844402	0.206547	0.319965	0.336426	0.0867163
ENSG00000172410	INSL5	0.378744	0	0	0.667091	0	0	0.46258	0.470285	0.225915	0.464313	0	0	0.812601	0.35216	0.505777	0.338297	0	0	0.0189873	0.164294	0.190674	0.14532
ENSG00000115977	AAK1	0.378704	0.3937	0.415097	0.339771	0.425028	0.144449	0.239661	0.432811	0.353175	0.383832	0.377047	0.297356	0.355836	0.431792	0.33873	0.422559	0.381527	0.432081	0.579571	0.491867	0.419355	0.439758
ENSG00000167654	ATCAY	0.378214	0.422079	0.513719	0.392759	0.39889	0.122582	0.387116	0.489458	0.405746	0.435362	0.423221	0.36815	0.501425	0.456454	0.44815	0.421323	0.215279	0.366192	0.405556	0.609232	0.453004	0.447718
ENSG00000105143	SLC1A6	0.377919	0.587053	0.406732	0.489088	0.286821	0	0.216696	0.563568	0.632791	0.409834	0.661688	0.373408	0.395725	0.442085	0.738448	0	0.0269015	0.0615801	0.0329703	0.11293	0.415379	0.314791
ENSG00000013561	RNF14	0.377848	0.414034	0.42607	0.335473	0.371788	0.126682	0.332787	0.363848	0.415099	0.390004	0.371845	0.294925	0.190307	0.411456	0.436848	0.375975	0.285796	0.372867	0.406102	0.340321	0.431167	0.406137
ENSG00000136928	GABBR2	0.377632	0.281909	0.359922	0.310163	0.548705	0.312747	0	0.380997	0.205174	0.270922	0.285309	0.0540696	0	0.39817	0.40223	0.607252	0.325818	0.551206	0.606345	0.584663	0.18537	0.361427
ENSG00000115840	SLC25A12	0.377533	0.369615	0.560978	0.33957	0.382157	0.136259	0.358749	0.519907	0.318971	0.327056	0.361712	0.28061	0.416643	0.609228	0.426338	0.274788	0.104162	0.267097	0.380583	0.371145	0.463334	0.495147
ENSG00000173166	RAPH1	0.377456	0.230224	0.397496	0.395318	0.199421	0.394987	0.407113	0.146225	0.145478	0.232149	0.270319	0.181948	0.106217	0.279579	0.366306	0.356896	0.27141	0.436204	0.410023	0.36204	0.359647	0.447933
ENSG00000124422	USP22	0.377385	0.363972	0.341117	0.377549	0.298708	0.165896	0.387094	0.32372	0.375338	0.36495	0.36021	0.250631	0.229058	0.370412	0.401573	0.388099	0.0751322	0.307052	0.412223	0.290519	0.359332	0.362458
ENSG00000178385	PLEKHM3	0.376962	0.0439988	0.231465	0.170113	0.0739317	0	0	0.157803	0.0254652	0	0	0	0	0.269863	0.150999	0.344276	0.0635608	0.286305	0.320917	0.249671	0.316105	0.341086
ENSG00000063438	AHRR	0.376961	0	0	0	0	0	0	0	0	0	0	0	0	0	0	0	0	0	0	0.31875	0	0.766219
ENSG00000170027	YWHAG	0.376866	0.428218	0.410313	0.393488	0.377878	0.235282	0.333815	0.402486	0.42557	0.426535	0.418797	0.340778	0.371414	0.417031	0.424901	0.406952	0.316302	0.375514	0.42686	0.373213	0.406001	0.398427
ENSG00000163596	ICA1L	0.376834	0.397191	0.317147	0.302101	0.295801	0.211946	0.302684	0.228785	0.43275	0.515702	0.409571	0.504486	0.119326	0.308201	0.380438	0.422972	0.280417	0.499984	0.399281	0.420091	0.394359	0.295445
ENSG00000148356	LRSAM1	0.37617	0.270041	0.609042	0.413721	0.404264	0.279782	0.5701	0.433838	0.160671	0.21612	0.299102	0.0527985	0.21963	0.441287	0.369593	0.0817342	0	0.19297	0.248466	0.29164	0.395095	0.408849
ENSG00000157851	DPYSL5	0.375922	0.29438	0.0231853	0.412656	0.200162	0	0.448984	0.0601848	0.328773	0	0.179167	0.260131	0	0.032851	0.277588	0	0.24073	0.359192	0.0953447	0.148612	0.313398	0.65599
ENSG00000173611	SCAI	0.375868	0.225835	0.271511	0.289977	0.310263	0.39717	0.40153	0.270412	0.266373	0.0440066	0.27308	0.259011	0.25008	0.273891	0.164446	0.330367	0.19049	0.388112	0.469469	0.642827	0.312585	0.831218
ENSG00000143153	ATP1B1	0.375569	0.433898	0.421467	0.35976	0.373809	0.245795	0.25201	0.407437	0.389337	0.412607	0.378875	0.336431	0.389139	0.426472	0.411684	0.41052	0.298274	0.288061	0.39684	0.422394	0.418752	0.382461
ENSG00000116793	PHTF1	0.375138	0.18932	0.193075	0	0	0.18647	0.123688	0.32941	0.103616	0.160462	0	0.0898351	0.0962567	0.313104	0.197002	0.358734	0	0.132369	0.357195	0.374475	0.284364	0.364034
ENSG00000129682	FGF13	0.374984	0	0.210447	0.428419	0	0.39963	0.622252	0.200273	0.393332	0	0.286102	0.316802	0	0	0.14531	0.458972	0.318331	0.0413223	0.479402	0.0855083	0	0.478244
ENSG00000156642	NPTN	0.374984	0.370388	0.462782	0.433743	0.255915	0.237473	0.261305	0.402666	0.286873	0.384352	0.269473	0.195784	0.38368	0.396242	0.233109	0.395303	0.281556	0.120971	0.36653	0.447999	0.373993	0
ENSG00000050748	MAPK9	0.374867	0.413854	0.55028	0.450765	0.48826	0.390363	0.423372	0.560021	0.386335	0.426311	0.448912	0.400504	0.396513	0.489361	0.499775	0.401572	0.123362	0.285938	0.291988	0.370963	0.436154	0.392675
ENSG00000123684	LPGAT1	0.374864	0.401257	0.560294	0.368074	0.290133	0.234592	0.211058	0.50167	0.176533	0.294519	0.371668	0.26372	0.341062	0.591077	0.46431	0.433042	0.30228	0.38322	0.362965	0.522714	0.471113	0.402656
ENSG00000120256	LRP11	0.374823	0.300081	0.324275	0.26467	0.427884	0.318563	0.338632	0.373879	0.106225	0.368984	0.207226	0.0707064	0.085762	0.407224	0.270955	0.441497	0.280771	0.403933	0.45987	0.455645	0.361272	0.45181
ENSG00000204851	PNMA8B	0.374742	0.46462	0.492053	0.450542	0.392073	0.195332	0.375464	0.450705	0.562674	0.452564	0.498814	0.44166	0.419067	0.450646	0.486267	0.414118	0.325262	0.164074	0.413706	0.324983	0.463423	0.436142
ENSG00000103056	SMPD3	0.374177	0	0	0	0	0.0994936	0	0	0.0943061	0.0177188	0	0	0	0	0	0.420291	0.417651	0.35062	0.589923	0.392429	0.243612	0.466395
ENSG00000159753	CARMIL2	0.373965	0.321908	0.333523	0.271411	0.587553	0	0.348699	0.544281	0.494871	0.502075	0.582246	0.402125	0	0.43738	0.430062	0.361801	0.0100598	0.362047	0.599501	0.16249	0.280523	0.290642
ENSG00000171724	VAT1L	0.373769	0.510051	0.482004	0.616357	0.486279	0	0.485449	0.473568	0.507538	0.262703	0.489232	0.471599	0.467682	0.47547	0.490741	0.309215	0	0.137916	0	0.471572	0.607351	0.17252
ENSG00000137338	PGBD1	0.373697	0.183765	0.279632	0.0585086	0.0853565	0	0.452423	0.0704559	0.0552206	0.0368481	0.35395	0	0.00935886	0.144197	0.0697115	0.0194688	0.357985	0.109037	0.197832	0	0.242682	0.173496
ENSG00000168843	FSTL5	0.373669	0.465857	0.470991	0.630843	0	0.39112	0.287701	0.462461	0.4388	0	0.476579	0.497616	0	0.40734	0.441477	0.417133	0.412633	0.269766	0.402885	0.415057	0.472701	0.618516
ENSG00000106571	GLI3	0.373592	0	0	0	0	0	0	0	0	0	0	0.0311448	0	0	0	0	0	0	0	0	0	0
ENSG00000120693	SMAD9	0.373159	0.366329	0.5807	0.457192	0	0.0934831	0.253282	0.34764	0.187894	0.380949	0.197361	0	0.360185	0.705866	0.275021	0	0	0	0	0	0.390135	0.457871
ENSG00000267699	AC091551	0.372709	0.617266	0.570849	0.475799	0.364393	0.0295506	0.616873	0.525406	0.403669	0.378269	0.435251	0.379943	0.0536096	0.439411	0.544532	0	0	0	0.189432	0.0561594	0.46717	0.386554
ENSG00000141161	UNC45B	0.372624	0	0	0.089613	0	0	0	0	0	0	0	0	0	0	0	0	0	0	0	0	0	0
ENSG00000141562	NARF	0.372493	0.111491	0.15811	0	0	0	0	0.0321538	0.249662	0.417062	0.12704	0.00473509	0.040107	0.272505	0.252371	0.192063	0.00454127	0.00196281	0.336829	0.215481	0.165619	0
ENSG00000071073	MGAT4A	0.372453	0.390644	0.365954	0.261328	0	0.0193258	0.333049	0.404776	0.366467	0.322828	0.413016	0.0945442	0.234015	0.368328	0.330886	0.397224	0.261642	0.133464	0.403057	0.180547	0.281919	0
ENSG00000222040	NA	0.372368	0	0	0	0	0	0	0	0	0	0	0	0	0	0	0	0	0	0	0	0	0
ENSG00000165972	CCDC38	0.372012	0	0	0.248911	0.0880539	0	0.323299	0.417918	0.473344	0.150057	0	0	0	0	0.101729	0.121474	0	0	0	0	0.316405	0
ENSG00000183309	ZNF623	0.371968	0.113774	0	0	0.143176	0	0.0875371	0	0	0	0	0	0	0.0250594	0	0	0	0	0.0407345	0	0	0.0309609
ENSG00000196440	ARMCX4	0.37189	0.428246	0.342755	0.67302	0.228401	0.351845	0.578349	0.359557	0.33218	0.0211077	0.228444	0.380414	0.0425134	0.296455	0.421501	0.213729	0.335135	0.313627	0.286642	0.300262	0.385257	0.268536
ENSG00000171150	SOCS5	0.371788	0.542346	0.62419	0.361837	0.422686	0	0.209048	0.551071	0.365181	0.424514	0.420729	0.354178	0.571105	0.580914	0.54458	0.223782	0.068579	0.321697	0.352	0.244968	0.458798	0.601093
ENSG00000242732	RTL5	0.371669	0.424413	0.589347	0.650875	0.34071	0	0.561432	0.390219	0.640018	0.358188	0.652627	0.448495	0.156417	0.382703	0.688537	0	0	0	0	0	0.607185	0.13037
ENSG00000144218	AFF3	0.371533	0.282486	0.353871	0.680365	0.378012	0.0314607	0.358001	0.286255	0.354366	0.40377	0.387686	0.359217	0.104164	0.370081	0.258771	0.310568	0	0.416465	0.399725	0.334996	0.367423	0.397196
ENSG00000173264	GPR137	0.371473	0.0608204	0.372857	0.342539	0.454048	0	0.185938	0.382006	0.0530884	0.0629841	0.343296	0	0	0.376294	0.317777	0.261812	0	0.14191	0.328677	0.362219	0.251144	0.241573
ENSG00000186310	NAP1L3	0.371044	0.559106	0.52462	0.671953	0.196785	0.299085	0.527519	0.351126	0.347978	0.182899	0.310115	0.0479908	0.207984	0.446053	0.396569	0	0	0	0.0957935	0.0565658	0.429365	0.33525
ENSG00000112175	BMP5	0.371021	0.16718	0	0	0	0	0	0	0	0.408248	0	0.347484	0	0.0092437	0	0	0	0	0	0	0	0
ENSG00000157837	SPPL3	0.370926	0.332846	0.45421	0.260153	0.188994	0	0.320387	0.284984	0.226352	0.21834	0.249955	0.20383	0.167088	0.360985	0.344102	0.345009	0	0.281717	0.314742	0.394608	0.40398	0.323507
ENSG00000113851	CRBN	0.370925	0.135604	0.181013	0.267636	0.0832704	0	0.312967	0.341727	0.288709	0.196635	0.255285	0.015869	0.0528743	0.279591	0.204049	0.242736	0.0132214	0.0483201	0.0278845	0.215266	0.298114	0.140354
ENSG00000152102	FAM168B	0.37088	0.386512	0.428541	0.284815	0.351816	0.123738	0.146272	0.40057	0.264466	0.351039	0.378398	0.325358	0.356511	0.462144	0.382266	0.359334	0.050184	0.297954	0.369915	0.320465	0.397535	0.251205
ENSG00000079841	RIMS1	0.370768	0.35716	0.312717	0.611745	0.245436	0.55071	0.664201	0.298695	0.179317	0.32874	0.425279	0.18328	0	0.305937	0.372861	0.550022	0.393802	0.405276	0.586234	0.319858	0.226007	0.709742
ENSG00000115839	RAB3GAP1	0.370533	0.364263	0.456731	0.294713	0.332178	0.303034	0.369686	0.366704	0.325641	0.353238	0.388553	0.190226	0.12266	0.422766	0.381822	0.347462	0.367	0.375526	0.339996	0.403794	0.349847	0.326381
ENSG00000188158	NHS	0.370285	0.504215	0.471103	0.601639	0	0.319539	0.406849	0.499136	0.435895	0.428985	0.448248	0.442973	0.448629	0.422406	0.386862	0	0	0	0	0	0.564152	0.72583
ENSG00000065000	AP3D1	0.37021	0.182668	0.204787	0.339948	0.317157	0.106979	0.518964	0.279891	0.0300211	0.260559	0.238683	0.0637958	0.103676	0.280136	0.31016	0.361507	0.300868	0.36979	0.320552	0.348981	0.335405	0.415196
ENSG00000171703	TCEA2	0.370179	0.319148	0.426371	0.320672	0.394202	0	0.238074	0.52992	0.388539	0.346557	0.371885	0.420495	0.223807	0.577598	0.41688	0.332635	0.135751	0.382977	0.365917	0.381933	0.241267	0.0849159
ENSG00000180287	PLD5	0.37	0.343468	0.376184	0.671637	0	0.352048	0.303925	0.377213	0.409559	0.326462	0.192585	0.326061	0	0.598797	0.370963	0.126821	0	0	0	0	0.395464	0
ENSG00000101210	EEF1A2	0.369884	0.396931	0.435784	0.447831	0.590811	0.404912	0.439046	0.454503	0.382684	0.435829	0.40162	0.357815	0.190138	0.501119	0.466194	0.338095	0.115256	0.37118	0.395823	0.41258	0.460229	0.451212
ENSG00000102024	PLS3	0.369077	0	0.0444113	0.195464	0.166201	0.309427	0.305929	0.142306	0	0	0.0663284	0.338232	0	0	0	0.0231018	0.287103	0.116189	0.281275	0.140206	0	0.311231
ENSG00000182749	PAQR7	0.368948	0	0.00745172	0.168479	0.0536817	0	0.197745	0.0968844	0	0	0	0.0374968	0	0.157489	0	0	0	0	0	0	0	0
ENSG00000183723	CMTM4	0.368483	0.272316	0.390161	0.544188	0.171298	0	0.252275	0.36628	0.407292	0.0953453	0.490224	0.160282	0.248734	0.384687	0.383627	0.461605	0.390194	0.492051	0.264919	0.594033	0.3515	0.139676
ENSG00000137414	FAM8A1	0.368396	0.346816	0.400366	0.687539	0.0495674	0.357093	0.659966	0.36183	0.388414	0.172112	0.380953	0.300144	0.0854278	0.394844	0.401125	0.332842	0.30552	0.279403	0.0793432	0.383483	0.362964	0.19978
ENSG00000159202	UBE2Z	0.368189	0.332839	0.414993	0.335693	0.399715	0.232584	0.405883	0.333858	0.0944274	0.191664	0.309469	0.39845	0.0808824	0.401588	0.423114	0.281806	0.237195	0.386462	0.344294	0.310693	0.398257	0.407405
ENSG00000102452	NALCN	0.368027	0.454081	0.427926	0.636844	0.429255	0.452987	0.406397	0.399402	0.359345	0.121006	0.354941	0.221161	0.258203	0.41888	0.4058	0.379947	0.351514	0.272954	0.347444	0.403795	0.425039	0.407557
ENSG00000111913	RIPOR2	0.368002	0	0.141848	0	0	0	0	0	0.244694	0.00939194	0.00187899	0	0	0	0.12456	0.33119	0.46268	0.570704	0.390386	0.0342648	0.314294	0.579393
ENSG00000166200	COPS2	0.367987	0.240789	0.369762	0.277012	0.247055	0.215525	0.366387	0.334631	0.230205	0.194416	0.378165	0.125544	0.137299	0.336813	0.208368	0.168574	0.0134514	0.131415	0.23787	0.0254603	0.321663	0.207067
ENSG00000198216	CACNA1E	0.367861	0.126126	0.117917	0.0319461	0.424514	0.287687	0.189927	0.229748	0.416625	0.375651	0.290102	0	0.51532	0.0185462	0.155673	0.765558	0.488101	0.598327	0.649267	0.629673	0.143243	0
ENSG00000089818	NECAP1	0.367857	0.429229	0.448147	0.423725	0.428149	0.120795	0.402435	0.414326	0.430362	0.411858	0.449836	0.415985	0.290965	0.452731	0.461886	0.37437	0.207085	0.400157	0.416105	0.362268	0.448137	0.423538
ENSG00000106683	LIMK1	0.367674	0.42547	0.776275	0.584083	0.708785	0.448927	0.400174	0.653795	0.15108	0.275759	0.491536	0.325144	0.444468	0.743848	0.643743	0	0	0	0	0.339725	0.574703	0.43762
ENSG00000107758	PPP3CB	0.367611	0.358178	0.335329	0.480002	0.342897	0.0990328	0.36606	0.364451	0.334709	0.413853	0.359582	0.293784	0.390717	0.411714	0.365662	0.532326	0.32899	0.437586	0.551402	0.416882	0.359171	0.364665
ENSG00000101350	KIF3B	0.367303	0.066175	0.427734	0.169994	0.357082	0.212753	0.0619916	0.133987	0.0832469	0.234135	0	0	0.242201	0.357686	0.162178	0.465208	0.105498	0.315764	0.482438	0.545261	0.360363	0.39365
ENSG00000140995	DEF8	0.367118	0.0972252	0.366376	0.185769	0.42942	0.10049	0.229313	0.338611	0	0	0.0793569	0	0	0.346439	0.252875	0	0	0.0750664	0.122782	0.0119747	0.298334	0.322436
ENSG00000157087	ATP2B2	0.366402	0.417455	0.580315	0.35544	0.489635	0.237149	0.165827	0.539195	0.156341	0.442002	0.289735	0.242993	0.535208	0.617186	0.424345	0.531187	0.273688	0.237062	0.444729	0.638191	0.432135	0.380714
ENSG00000196821	C6orf106	0.366402	0.107345	0.233778	0.184328	0.339781	0.213532	0.322332	0.204871	0.00868022	0.139602	0.00272454	0	0.161297	0.339566	0.20312	0.28205	0	0.183107	0.376582	0.33185	0.1999	0.296003
ENSG00000152954	NRSN1	0.366112	0.446919	0.398878	0.383777	0.426715	0.278613	0.253059	0.403906	0.507001	0.46082	0.428915	0.421493	0.361395	0.40412	0.444078	0.240246	0.151127	0.370853	0.368289	0.420552	0.409442	0
ENSG00000137267	TUBB2A	0.365626	0.353114	0.363315	0	0.338603	0	0.0895228	0.249385	0.302758	0.349221	0.262961	0.192475	0	0.277885	0.302808	0.369696	0.316842	0.265707	0.385218	0.281327	0.377167	0.261871
ENSG00000145214	DGKQ	0.365534	0.589464	0.787115	0.651886	0.553034	0	0.345533	0.647253	0.37187	0.346009	0.498362	0.433227	0	0.682058	0.754454	0.24103	0	0	0.309406	0.385978	0.606562	0.320389
ENSG00000175564	UCP3	0.365471	0	0	0	0	0	0	0	0	0	0	0	0	0.0731092	0	0.0620172	0	0	0	0	0	0
ENSG00000165650	PDZD8	0.365344	0.292007	0.339321	0.437808	0	0	0.144134	0.119568	0	0.0197521	0.0770848	0.229678	0.0809492	0.368223	0.0938968	0.204226	0	0.0852691	0	0.160847	0.265776	0
ENSG00000078549	ADCYAP1R1	0.365323	0.338486	0.530561	0.352582	0.36883	0	0.460434	0.317553	0.387839	0.0262393	0.437723	0.197007	0.279759	0.356194	0.399635	0	0.0376523	0	0	0	0.347711	0.403941
ENSG00000171533	MAP6	0.365173	0.261316	0.41101	0.314583	0.425988	0	0.382123	0.395638	0.133861	0.253049	0.334526	0.00556693	0.104211	0.419698	0.32677	0.37815	0.124639	0.421502	0.243914	0.416875	0.352592	0
ENSG00000124574	ABCC10	0.365048	0.146809	0.503293	0.278134	0.409472	0.41754	0.0778932	0.369115	0.41983	0	0.504242	0	0.0961413	0.389077	0	0	0	0	0.0213056	0.0413211	0.0270865	0
ENSG00000144635	DYNC1LI1	0.364794	0.278727	0.368447	0.308208	0.215538	0.231829	0.39455	0.303004	0.222743	0.160232	0.150212	0.0966214	0	0.364054	0.308783	0.328321	0.222102	0.357836	0.317794	0.236825	0.276447	0.258046
ENSG00000185386	MAPK11	0.364787	0	0.249966	0.320553	0.374606	0	0.425838	0.28354	0.339412	0.0348567	0.366712	0.376965	0.511922	0.139781	0.116041	0.311442	0.0941398	0.367328	0.396449	0.358043	0	0.225595
ENSG00000176406	RIMS2	0.364747	0	0	0.137524	0	0.213643	0.305315	0	0.30062	0.439309	0.19073	0.00284414	0.143563	0.147228	0.0276075	0.0195589	0	0.0188853	0.103236	0.216789	0	0.280508
ENSG00000169083	AR	0.364341	0.339128	0.309868	0.682048	0	0	0.238916	0.587836	0.207073	0	0.817689	0.0915506	0.282743	0.5337	0.268416	0.664083	0.593495	0.3988	0.511254	0.429183	0.242388	0.0751263
ENSG00000107819	SFXN3	0.364239	0.161408	0.159408	0.245636	0.36479	0.130897	0.166566	0.325539	0.167308	0.0872533	0.136371	0.0610443	0.318814	0.327506	0.420458	0.415136	0.357288	0.439131	0.411443	0.387607	0.276786	0.386715
ENSG00000170606	HSPA4	0.363891	0.369704	0.395616	0.161561	0.355875	0.160744	0.330099	0.35244	0.249954	0.267778	0.225218	0.149347	0.149933	0.416114	0.349707	0.376725	0.149805	0.272973	0.397933	0.364333	0.411995	0.396455
ENSG00000127220	ABHD8	0.363782	0.424081	0.379415	0.171842	0.334953	0.0243902	0	0.380124	0.440674	0.429905	0.388431	0.415449	0.247611	0.404572	0.406786	0.342574	0.173833	0.260006	0.361276	0.172061	0.371299	0.367822
ENSG00000136040	PLXNC1	0.363647	0.0208123	0	0	0	0	0.293562	0	0.575319	0.37016	0.251633	0	0	0	0	0.432799	0.322721	0.270049	0.398072	0.26588	0.2845	0
ENSG00000188042	ARL4C	0.36334	0.440267	0.440106	0.417716	0.588342	0.3528	0.395664	0.414989	0.433052	0.353936	0.399369	0.415052	0	0.454113	0.430433	0	0	0	0	0	0.444361	0.848967
ENSG00000105186	ANKRD27	0.36312	0	0	0	0	0	0.115797	0	0	0	0	0	0	0	0	0.0586153	0.341597	0.168991	0.426201	0.234314	0	0
ENSG00000137252	HCRTR2	0.362947	0.78331	0.209395	0.352052	0.898221	0.895956	0.0906435	0.140182	0.485297	0.591518	0.365851	0	0	0.70254	0.691911	0	0	0	0	0	0.843559	0
ENSG00000183379	SYNDIG1L	0.36272	0.420876	0	0.164361	0.298045	0.354455	0	0	0.340392	0.857067	0.00920707	0	0.889523	0.314134	0.381032	0	0	0	0	0	0	0.678864
ENSG00000095539	SEMA4G	0.362604	0.389595	0.529666	0.196302	0.435907	0.058427	0.148583	0.285135	0.166839	0.0568496	0.159414	0.158858	0	0.529693	0.339136	0	0	0.255392	0	0	0.412021	0.602672
ENSG00000176049	JAKMIP2	0.362515	0.213367	0.241811	0.125216	0.00242668	0	0.273254	0.296943	0.289854	0.390165	0.316099	0.00447914	0.325684	0.301341	0.110004	0.451697	0.342248	0.349075	0.389348	0.360529	0.342573	0.372402
ENSG00000116750	UCHL5	0.362437	0.376111	0.384878	0.0265729	0.233616	0	0.00119295	0.30326	0.350288	0.277145	0.359015	0.342939	0	0.395172	0.398867	0.0484368	0.187569	0.201232	0.0248455	0.135082	0.387483	0.384616
ENSG00000069188	SDK2	0.362388	0.0253587	0	0.0245664	0.18131	0.0198876	0.112124	0	0.416578	0	0	0	0	0.10674	0	0	0.459999	0.553332	0.0536023	0.823686	0.0569917	0.817382
ENSG00000172159	FRMD3	0.362117	0.253614	0.18936	0.356203	0	0	0.363452	0.149445	0.181391	0.12523	0.300069	0.0843975	0.343764	0.139396	0.237936	0.0798248	0	0	0	0	0.351514	0.253365
ENSG00000106633	GCK	0.362063	0.17481	0	0	0.0950385	0	0	0.153475	0.905482	0.771195	0.22563	0	0	0	0.341225	0.244907	0.287186	0.261865	0.33654	0.0253351	0.396268	0
ENSG00000117152	RGS4	0.361872	0.185654	0	0.239179	0.322308	0.115959	0	0	0	0.498901	0.0760522	0	0	0.114759	0	0.497936	0.249132	0.419933	0.138127	0.640524	0.34486	0
ENSG00000174672	BRSK2	0.361837	0.371725	0.623674	0.382097	0.39241	0	0.306074	0.52624	0.336419	0.516594	0.332432	0.32597	0.436557	0.58919	0.404222	0.420406	0.318428	0.297678	0.464171	0.514014	0.379291	0.274201
ENSG00000105173	CCNE1	0.361753	0.104406	0.352621	0.166228	0.375003	0	0	0.392283	0	0.23074	0	0	0.166285	0.582198	0.397539	0.550503	0	0	0.0102296	0.459745	0.375511	0.370302
ENSG00000106078	COBL	0.361717	0.461694	0.134379	0.354761	0.0146917	0.205903	0.405482	0.0976311	0.425191	0.41804	0.498081	0.0486307	0.372496	0.0905913	0.211093	0.553895	0	0.686228	0	0.589523	0.238056	0
ENSG00000137821	LRRC49	0.361636	0.319825	0.607961	0.314274	0.426852	0.399697	0.132734	0.638372	0.389931	0.436618	0.423647	0.237089	0.379523	0.565685	0.366843	0.125222	0	0.189733	0.280526	0.367901	0.384972	0.0522918
ENSG00000115762	PLEKHB2	0.361307	0.458106	0.464724	0.442433	0.449391	0.259577	0.411538	0.448237	0.431273	0.427245	0.448899	0.429566	0.183222	0.469133	0.465295	0.333675	0.296315	0.395833	0.306139	0.330485	0.460834	0.451798
ENSG00000177932	ZNF354C	0.361084	0.369074	0.324276	0	0.0406525	0.173717	0.27175	0.197563	0.0746547	0.261527	0.231116	0	0.127421	0.339958	0.271652	0.471032	0.153576	0	0.331374	0.444275	0.321385	0.211892
ENSG00000132639	SNAP25	0.360858	0.423868	0.410741	0.385169	0.385318	0.243167	0.287781	0.407442	0.394689	0.420844	0.393963	0.382518	0.385406	0.422608	0.41551	0.431434	0.343455	0.321249	0.42125	0.387275	0.398456	0.371111
ENSG00000164512	ANKRD55	0.36071	0.605425	0.517805	0.751618	0.359374	0	0.62531	0.502002	0	0.197181	0.516553	0.266175	0.175245	0.600623	0.411109	0	0	0	0.107006	0	0.347897	0.145788
ENSG00000179051	RCC2	0.360658	0.317542	0.230637	0.0330207	0.0257989	0	0	0.23268	0.0016785	0.0278369	0.146264	0	0.219297	0.28539	0.261278	0.322194	0.0635203	0.0618506	0.213138	0.331182	0	0
ENSG00000166228	PCBD1	0.360226	0.439188	0.264787	0.411579	0.367338	0	0.479121	0.382488	0.550851	0.378518	0.476834	0.480253	0	0.158318	0.411361	0	0	0	0	0	0.198671	0.539114
ENSG00000109738	GLRB	0.360221	0.407282	0.412408	0.652345	0.395278	0.286004	0.323591	0.450228	0.288258	0.272515	0.364257	0.325344	0.381235	0.429693	0.347674	0.314855	0.0831226	0.212411	0.0915129	0.394165	0.358068	0.194754
ENSG00000260230	FRRS1L	0.360041	0.430496	0.368206	0.36799	0.0846241	0.029016	0.212007	0.377273	0.204257	0.377779	0.321344	0.325723	0.334135	0.374627	0.339705	0.595003	0.412841	0.445426	0.624967	0.568473	0.356267	0.43484
ENSG00000112078	KCTD20	0.359976	0.374872	0.280735	0.181525	0.332654	0	0.179825	0.237178	0.188699	0.0571747	0.167223	0.159967	0	0.324363	0.308439	0.210515	0.17683	0.173448	0.287698	0.213519	0.365036	0.0699788
ENSG00000018189	RUFY3	0.359973	0.393769	0.413589	0.412051	0.381766	0.347174	0.385158	0.354901	0.297229	0.383296	0.347569	0.199898	0.182219	0.431736	0.380476	0.312737	0.112152	0.273854	0.332824	0.334431	0.42008	0.399937
ENSG00000109685	NSD2	0.359927	0.349419	0.394498	0.386495	0.341349	0.262331	0.319829	0.376504	0.146777	0.343647	0.364891	0.12292	0.150067	0.403647	0.403993	0.305532	0.0833525	0.271232	0.312552	0.32657	0.403644	0.398252
ENSG00000186231	KLHL32	0.359633	0.520258	0.486058	0.41543	0.513165	0	0.263788	0.563578	0.365152	0.345234	0.33279	0.262015	0	0.549991	0.460132	0	0	0	0	0.405112	0.574464	0.38333
ENSG00000271303	SRXN1	0.359615	0.424639	0.458062	0.376352	0.446765	0.0281749	0.216444	0.442762	0.447435	0.451742	0.437334	0.404361	0.313031	0.535865	0.446029	0.265555	0	0.255438	0.418719	0.295839	0.460997	0.454953
ENSG00000110497	AMBRA1	0.359482	0.220666	0.308721	0.178595	0.22746	0.150275	0.179744	0.132357	0	0.0015976	0.171968	0	0.131198	0.122676	0.15495	0.252064	0.116478	0.190019	0.252706	0.350606	0.228571	0.119761
ENSG00000102781	KATNAL1	0.359452	0.415387	0.452299	0.382022	0.263112	0.173848	0.378225	0.385429	0.29628	0.0316615	0.375211	0.232912	0.11611	0.449646	0.40082	0.309261	0.15373	0.341499	0.342084	0.291883	0.369843	0.418781
ENSG00000198598	MMP17	0.35938	0	0.113936	0	0	0	0	0.0212412	0	0	0	0	0	0	0.0604766	0.804239	0.802109	0.681697	0.788023	0.893371	0	0
ENSG00000169783	LINGO1	0.359204	0.203871	0.289872	0.0506546	0.307235	0.265579	0	0.154674	0.0666603	0.462872	0	0	0.25669	0.317691	0.0852471	0.828068	0.568479	0.626729	0.745963	0.821126	0.069931	0
ENSG00000197457	STMN3	0.358897	0.427653	0.404413	0.314054	0.398609	0.200589	0.234301	0.40427	0.416733	0.428257	0.403701	0.326136	0.37702	0.418606	0.399371	0.405074	0.320081	0.317714	0.375268	0.416867	0.399239	0.387585
ENSG00000188175	HEPACAM2	0.358875	0	0.0768786	0.587156	0	0	0	0.584636	0	0	0.0541916	0.347048	0	0	0.101678	0	0	0	0	0	0	0
ENSG00000140534	TICRR	0.358642	0	0	0	0	0	0	0.190317	0	0	0	0	0	0	0	0	0	0	0	0.0604054	0	0
ENSG00000168234	TTC39C	0.358513	0.249521	0	0	0.0491329	0	0.0528097	0.251249	0	0	0	0.162748	0.321312	0.107618	0	0	0	0	0.370378	0	0.223651	0.366137
ENSG00000196497	IPO4	0.358115	0.119852	0.326426	0.156043	0.264326	0	0.265145	0.362459	0.257589	0.166644	0.352759	0.192031	0.0760695	0.373074	0.235734	0.309226	0.220879	0.0338277	0.329818	0.368326	0.316676	0.289373
ENSG00000110436	SLC1A2	0.357974	0	0	0	0	0	0	0	0	0	0	0	0	0	0	0	0	0.237234	0.597821	0.101075	0	0
ENSG00000133026	MYH10	0.357857	0.360563	0.426424	0.35159	0.421398	0.306141	0.365717	0.441694	0.284276	0.388983	0.381512	0.318117	0.180573	0.435727	0.415186	0.515074	0.377906	0.317882	0.367138	0.488908	0.403293	0.420972
ENSG00000149541	B3GAT3	0.357721	0.326779	0.37777	0.282749	0.426371	0.0101976	0.242666	0.418661	0.253143	0.275067	0.311533	0.0918224	0.108155	0.424114	0.383414	0.31223	0.0175903	0.126874	0.414291	0.329446	0.418636	0.427131
ENSG00000100346	CACNA1I	0.357559	0.509955	0.61309	0	0.551385	0.546805	0	0.63588	0.199024	0.0127324	0.331648	0.149732	0.752636	0.672699	0.546365	0.51851	0	0.218007	0.47294	0.844188	0.223835	0.237108
ENSG00000153558	FBXL2	0.357444	0.298433	0.339837	0.279601	0.057246	0.0918954	0.100089	0.426545	0.205018	0.333905	0.388849	0.398876	0.164997	0.365812	0.263828	0.408305	0.311121	0.439903	0.123474	0.469532	0.318971	0.29363
ENSG00000116199	FAM20B	0.357218	0.425486	0.543003	0.405912	0.352709	0.0829454	0.500004	0.536363	0.379323	0.336403	0.473488	0.277377	0.220495	0.608158	0.463945	0.345854	0.194518	0.406203	0.435609	0.519314	0.503357	0.441854
ENSG00000103489	XYLT1	0.357173	0	0	0	0.420041	0	0	0	0	0	0	0	0.115245	0	0	0.415467	0.869526	0.77759	0.306805	0.849556	0	0
ENSG00000068366	ACSL4	0.357133	0.173689	0.304723	0.702825	0.215433	0.363421	0.799623	0.26739	0.393994	0.0903416	0.27077	0	0	0.308783	0.383126	0.414967	0.308455	0.307632	0.356417	0.33544	0.289657	0.120683
ENSG00000153827	TRIP12	0.357111	0.193105	0.286639	0.399244	0.0506501	0.16463	0.38768	0.316401	0.0689622	0.0648238	0.0310973	0.131943	0	0.216919	0.144616	0.188181	0	0	0.121367	0.250121	0.22174	0.105907
ENSG00000101152	DNAJC5	0.357069	0.409008	0.413732	0.391374	0.356206	0.147708	0.307769	0.406925	0.384547	0.361382	0.417309	0.339359	0.280992	0.421093	0.427327	0.376829	0.23752	0.321918	0.386221	0.360725	0.412365	0.398612
ENSG00000022567	SLC45A4	0.356947	0.421874	0.553898	0.287686	0.323144	0.290856	0.00408012	0.606252	0.274835	0.409705	0.284802	0.117133	0.503397	0.635177	0.35406	0.371202	0	0.202332	0.357583	0.437242	0.413946	0.19745
ENSG00000204991	SPIRE2	0.356591	0.422398	0.630671	0.195954	0.420572	0	0.358945	0.405974	0.33875	0.237253	0.410736	0.432341	0	0.472245	0.44653	0	0	0	0.160663	0.0727804	0.428976	0.0527512
ENSG00000154548	SRSF12	0.356544	0.345693	0.285512	0.349614	0.0955683	0	0.415644	0.335988	0.415016	0.148388	0.526065	0.438278	0	0.213464	0.557188	0.359607	0.101803	0.418976	0.407421	0.0917235	0.425129	0.460349
ENSG00000142185	TRPM2	0.35653	0.487532	0.606967	0.341558	0.426493	0	0	0.75396	0.359979	0.416783	0.431999	0.364194	0.708509	0.7603	0.581131	0.333895	0.290783	0.377268	0.209957	0.608422	0.522776	0.285336
ENSG00000108379	WNT3	0.356386	0	0	0	0.751181	0	0	0	0	0	0	0	0	0	0	0	0	0	0	0	0	0
ENSG00000140382	HMG20A	0.356315	0.229025	0.185495	0.263809	0.337106	0	0.280087	0.251407	0.43861	0.242035	0.279906	0.0342334	0.256855	0.368951	0.232652	0.194271	0	0.405839	0.28315	0.365167	0.216029	0.285322
ENSG00000108389	MTMR4	0.356002	0.378782	0.386455	0.632013	0.562081	0.40614	0.606724	0.409979	0.198161	0.147608	0.344784	0.0653954	0	0.380999	0.4091	0.291643	0	0	0.0837692	0.246808	0.366457	0.365122
ENSG00000006715	VPS41	0.3559	0.394779	0.472995	0.271089	0.320685	0	0.255235	0.370304	0.319531	0.33232	0.388406	0.294428	0.241015	0.408898	0.376719	0.324629	0.322975	0.277423	0.363393	0.356323	0.379741	0.304166
ENSG00000176641	RNF152	0.355853	0.446206	0.457273	0.652689	0.766457	0.565111	0.393403	0.428784	0.385189	0.476464	0.360653	0.369642	0.560539	0.564859	0.461961	0.0432004	0	0	0	0.0753825	0.445926	0
ENSG00000130413	STK33	0.355811	0	0	0.0782224	0	0	0.133299	0	0	0	0	0	0	0	0	0	0	0	0	0	0	0.0460153
ENSG00000177542	SLC25A22	0.355785	0.312383	0.339985	0.290566	0.547687	0.173283	0.210356	0.273158	0.36665	0.370007	0.320972	0.113386	0	0.363879	0.358595	0.555098	0.488362	0.60356	0.656402	0.581374	0.358671	0.334097
ENSG00000138669	PRKG2	0.355762	0.323476	0	0.467125	0	0	0.151633	0	0	0.468162	0	0.593267	0	0.0888529	0.12304	0.876848	0	0.692971	0	0	0	0
ENSG00000087470	DNM1L	0.355581	0.408097	0.41607	0.402671	0.325785	0.123423	0.368905	0.389843	0.365315	0.414856	0.393377	0.225081	0.164973	0.399356	0.383273	0.363454	0.280512	0.340941	0.39994	0.340892	0.424324	0.437482
ENSG00000188573	FBLL1	0.355275	0.279354	0.641004	0.644381	0.406321	0.107528	0.488992	0.4642	0.463994	0.412878	0.573771	0.0191505	0	0.594681	0.51834	0.287907	0.167527	0.0176604	0.373138	0.310943	0.605533	0.653734
ENSG00000155506	LARP1	0.355152	0.331581	0.488245	0.354275	0.362163	0.0441548	0.539303	0.384024	0.0724151	0.0793958	0.238467	0.121193	0.133088	0.471282	0.380649	0.252087	0.16618	0.352615	0.401813	0.332354	0.423445	0.436133
ENSG00000108684	ASIC2	0.3551	0.036371	0.449369	0.431444	0	0	0.464461	0.42824	0.261399	0.0375194	0.45066	0.225037	0.137332	0.416246	0.438298	0.458128	0.243094	0.324604	0.354094	0.442622	0.50184	0.0388498
ENSG00000101019	UQCC1	0.354879	0.342991	0.37456	0.162852	0.39741	0	0.146789	0.37285	0.374772	0.27204	0.330003	0.249011	0.266498	0.427166	0.425432	0	0	0	0.102764	0.0466035	0.403166	0.459565
ENSG00000162636	FAM102B	0.354732	0	0	0.0177804	0	0	0.148895	0.030582	0.0261366	0	0	0.0216278	0	0	0	0.304722	0	0.378768	0	0.145932	0.161492	0.169326
ENSG00000151014	NOCT	0.35472	0.308647	0.28755	0.500266	0.246368	0	0.166332	0.2331	0.275292	0.262617	0.294289	0.136342	0.0872995	0.288512	0.319422	0.525382	0.293858	0.312244	0.420622	0.327921	0.274161	0.156316
ENSG00000143369	ECM1	0.354472	0	0	0	0	0.0517978	0.0668119	0	0	0	0	0	0	0	0	0	0.0654823	0	0	0	0	0
ENSG00000120694	HSPH1	0.354382	0.334305	0.462603	0.319529	0.220288	0	0.384614	0.368256	0.307654	0.086464	0.327759	0.24278	0.0826203	0.374397	0.366594	0.390874	0.352313	0.385321	0.420794	0.380824	0.416173	0.355811
ENSG00000135740	SLC9A5	0.353966	0	0.554953	0.520808	0.348872	0	0.319698	0.64774	0.327615	0.734163	0.484232	0.426506	0.663038	0.776017	0.626976	0.604421	0	0	0	0.523734	0.361661	0.292872
ENSG00000156515	HK1	0.353847	0.366347	0.420845	0.411582	0.418285	0.00862069	0.437409	0.366858	0.264215	0.248053	0.381869	0.184954	0.0743316	0.412846	0.428205	0.415909	0.400442	0.444485	0.448084	0.416164	0.404858	0.383995
ENSG00000090470	PDCD7	0.353604	0.180675	0.207488	0.434193	0.225947	0	0.206462	0.235533	0.372207	0.265057	0.369059	0.235995	0	0.229182	0.341025	0.287137	0	0.269055	0.296087	0.243728	0.092829	0.23842
ENSG00000077254	USP33	0.353504	0.314179	0.42402	0.626865	0	0.399344	0.373996	0.41262	0.319339	0.378355	0.299655	0.0858075	0.361549	0.42795	0.404697	0.313865	0.088183	0.0539355	0.260319	0.350739	0.332061	0.111983
ENSG00000171208	NETO2	0.353326	0	0.33032	0.26974	0.398754	0	0.270582	0.0644885	0	0.305458	0	0	0.332173	0.351005	0.308961	0.179564	0.405172	0	0.403257	0	0.393744	0
ENSG00000181291	TMEM132E	0.353283	0.392518	0.345719	0.401573	0	0	0.64446	0.353881	0.00824861	0	0.436749	0.33957	0.586514	0.440713	0.393163	0.552721	0.195604	0	0.151363	0	0.1976	0.663568
ENSG00000104093	DMXL2	0.353208	0.321114	0.389836	0.448535	0.416548	0.33239	0.353892	0.379754	0.33148	0.256014	0.286319	0.147306	0.258299	0.386375	0.318847	0.467157	0.425364	0.441753	0.584188	0.407224	0.355523	0.371903
ENSG00000113360	DROSHA	0.353146	0.318156	0.36699	0.159037	0.384306	0.32899	0.138558	0.291502	0.175625	0.167059	0.16884	0.33008	0.0888369	0.38435	0.191153	0.299991	0.351957	0.270846	0.332692	0.396837	0.394548	0.377039
ENSG00000162373	BEND5	0.352961	0.190487	0.0660526	0	0.339706	0	0.238759	0.0317272	0.0746671	0	0	0	0.071384	0.107035	0.156013	0.0363221	0	0.369655	0	0.758944	0.394922	0
ENSG00000157077	ZFYVE9	0.352758	0.35525	0.541462	0.332462	0.498987	0.369181	0	0.396302	0.260654	0.398086	0.295285	0.119891	0.376307	0.594528	0.382772	0.106558	0.064261	0.0303719	0.321221	0.249888	0.373604	0.196294
ENSG00000147789	ZNF7	0.352704	0.10203	0.20075	0	0.0874759	0	0.0390857	0.00390548	0	0.212503	0	0.101725	0.848219	0.112827	0.515913	0.188443	0.0819575	0.0543831	0	0.113034	0.125652	0.23876
ENSG00000082175	PGR	0.352652	0.472921	0.230061	0.808374	0.027264	0	0.629415	0.379691	0.442597	0.638981	0.405268	0.653497	0.399102	0.581942	0.356452	0.183582	0	0.582675	0	0.432962	0.307592	0.217445
ENSG00000151067	CACNA1C	0.352648	0.311419	0.000466505	0.0886644	0.373565	0.0207299	0	0.265792	0.107523	0	0.21306	0	0.0821524	0.213948	0	0.607991	0.280114	0.382773	0.680555	0.330866	0.166226	0.401876
ENSG00000116005	PCYOX1	0.352297	0.0737018	0.242609	0.228907	0.226994	0	0.24806	0.256373	0.0601381	0.134185	0.190566	0.220416	0.110227	0.185835	0.118962	0.25125	0.0346631	0.20821	0.296443	0.398995	0.0962933	0.350158
ENSG00000182568	SATB1	0.352121	0	0	0.127531	0.0641321	0	0	0.0607198	0	0	0	0	0	0	0.273165	0	0	0.546401	0.454834	0.625811	0.451901	0
ENSG00000163512	AZI2	0.352034	0.139844	0.286303	0.213291	0.177079	0.068545	0.237493	0.228485	0.192391	0.242519	0.293012	0.083184	0.201688	0.314671	0.24038	0.336019	0.0655323	0.109662	0.191637	0.157229	0.236316	0.377326
ENSG00000060982	BCAT1	0.352027	0.654248	0.685143	0.564217	0.378084	0.0319596	0.432018	0.597802	0.417699	0.45772	0.449892	0.361404	0.38347	0.676779	0.589238	0	0.240883	0	0.311009	0.393906	0.61664	0.644938
ENSG00000175161	CADM2	0.351998	0.228936	0.30851	0.408371	0.165765	0.309057	0.203061	0.364194	0.125887	0.101956	0.107525	0.200682	0.232649	0.326033	0.155514	0.558904	0.164406	0.294918	0.397809	0.416463	0.134377	0.151884
ENSG00000177034	MTX3	0.351893	0.466701	0.574804	0.234616	0.473479	0.360414	0.291383	0.458964	0.0687836	0	0.284898	0	0.0544786	0.61764	0.305928	0.220992	0	0	0.315264	0.29883	0.611482	0.280163
ENSG00000122952	ZWINT	0.351844	0.448515	0.429585	0.38784	0.37987	0.223612	0.332967	0.40592	0.447513	0.420707	0.432272	0.396924	0.354375	0.420691	0.432035	0.400392	0.314003	0.348721	0.364886	0.284121	0.43005	0.388017
ENSG00000017427	IGF1	0.351833	0.159979	0	0	0	0	0	0.00570325	0	0	0	0	0	0	0	0	0	0	0	0	0	0.919686
ENSG00000148300	REXO4	0.351602	0.23224	0.225036	0	0.186011	0	0	0.273211	0.350841	0.350504	0.0496909	0.214648	0.0309492	0.27729	0.102606	0.211516	0.286581	0.154026	0.276976	0.315627	0	0.0413297
ENSG00000066933	MYO9A	0.351393	0.17043	0.282376	0.334491	0	0.277772	0.391568	0.207525	0.201578	0	0.331443	0.0588687	0.0729947	0.0561793	0.181304	0.372574	0.114957	0.292154	0.365634	0.353838	0.290584	0.298103
ENSG00000102316	MAGED2	0.351384	0.2809	0.41073	0.0927772	0.214289	0	0.140652	0.233743	0	0	0.28283	0.337316	0	0.329308	0.333456	0	0	0	0	0	0.418862	0.00990099
ENSG00000166922	SCG5	0.35111	0.378598	0.357523	0.303086	0.194754	0.103133	0.108402	0.361022	0.397495	0.362386	0.344588	0.291104	0.270648	0.334061	0.324017	0.360025	0.222637	0.151395	0.309934	0.371782	0.332024	0.186099
ENSG00000154174	TOMM70	0.351051	0.293263	0.306517	0.552129	0.278906	0	0.437764	0.341513	0.261466	0.35979	0.314849	0.136294	0.0768717	0.2718	0.352593	0.399229	0.0950793	0.355392	0.387081	0.30537	0.394512	0.285652
ENSG00000104140	RHOV	0.350939	0.556582	0.619511	0.329506	0.498812	0	0.531889	0.509168	0.456339	0.450174	0.594519	0.313634	0.389183	0.414912	0.557758	0	0	0.217269	0.264332	0.308664	0.413984	0.367085
ENSG00000143862	ARL8A	0.350872	0.21554	0.258362	0.131692	0.332111	0	0.221466	0.178707	0.08709	0.102101	0.0985062	0.110059	0	0.28201	0.23682	0.249245	0.189584	0.256292	0.291907	0.28251	0.276084	0.28814
ENSG00000162694	EXTL2	0.350844	0.403102	0.61071	0.425922	0.340555	0.0458974	0.362173	0.441912	0	0.11365	0.0859011	0.197447	0.122674	0.600173	0.439746	0.122966	0	0	0.112211	0.0518142	0.383183	0.349979
ENSG00000180815	MAP3K15	0.350723	0.15289	0.0426226	0	0	0	0	0	0.113757	0	0.428178	0	0	0.0236755	0	0.535908	0.428448	0	0	0.0849824	0	0
ENSG00000168824	HGNC:18790	0.350722	0.447167	0.444928	0.390065	0.391093	0.221405	0.306794	0.441909	0.443534	0.440223	0.433526	0.394964	0.412742	0.451798	0.449675	0.402529	0.235926	0.25958	0.385312	0.402358	0.440955	0.388106
ENSG00000109103	UNC119	0.350667	0.346273	0.389832	0.144038	0.377029	0.326618	0	0.351924	0.444021	0.371234	0.358713	0.415735	0	0.387603	0.415827	0	0	0	0	0	0.396846	0.538179
ENSG00000145495	2020-03-06	0.350101	0.316288	0.384533	0.509969	0.24185	0.180535	0.421364	0.355547	0.316445	0.31707	0.3905	0.274118	0.353394	0.338854	0.390325	0.425038	0.223455	0.356223	0.424458	0.439099	0.399601	0.340349
ENSG00000165323	FAT3	0.350065	0.310158	0.273199	0.18767	0	0	0.309219	0.157889	0.100517	0.475119	0	0	0.0628342	0.311151	0.19983	0.484137	0.403226	0.412067	0.319553	0.653944	0.220133	0
ENSG00000156959	LHFPL4	0.350039	0.436824	0.450854	0.377982	0.399137	0.361411	0.266617	0.428162	0.388418	0.31495	0.415364	0.350486	0.38348	0.449472	0.443724	0.455084	0.312101	0.382768	0.434149	0.478137	0.512097	0.449858
ENSG00000008056	SYN1	0.349914	0.372919	0.406448	0.43694	0.517922	0.208999	0.39233	0.43027	0.402346	0.428968	0.395453	0.208397	0.33918	0.444251	0.42792	0.491637	0.43629	0.503573	0.518959	0.403919	0.397273	0.436729
ENSG00000105576	TNPO2	0.349881	0.312559	0.4184	0.377587	0.403084	0	0.434536	0.383895	0.294492	0.175406	0	0.324363	0.127941	0.409699	0.366312	0.385516	0.36132	0.334713	0.352886	0.385723	0.438079	0.396652
ENSG00000116688	MFN2	0.349487	0.375981	0.465786	0.516916	0.42219	0.0900967	0.442916	0.399626	0.285986	0.327644	0.328318	0.272716	0.133222	0.459296	0.453936	0.334702	0.362009	0.376281	0.423395	0.411803	0.407147	0.436715
ENSG00000140463	BBS4	0.349479	0.340915	0.340936	0.159267	0.339544	0.145944	0.101311	0.383686	0.328308	0.34253	0.407512	0.270043	0.220747	0.394408	0.34197	0.278029	0.125853	0.27193	0.2734	0.265832	0.381299	0.306541
ENSG00000132361	CLUH	0.349311	0.270352	0.608594	0.46606	0.448086	0.333364	0.331723	0.520546	0.199913	0	0.371148	0.15038	0.10107	0.59474	0.510461	0.279315	0.0119568	0.0791716	0.299464	0.538232	0.420241	0.413127
ENSG00000204590	GNL1	0.348344	0.385403	0.466324	0.354024	0.40561	0.329522	0.368898	0.320979	0.23312	0.156762	0.357402	0.0913745	0.266426	0.457103	0.419115	0.358156	0.10123	0.373537	0.39316	0.309183	0.406394	0.360056
ENSG00000138336	TET1	0.348082	0.0425864	0.188164	0.0313363	0.263764	0.377848	0	0.0297666	0.0559744	0.198035	0.126049	0	0.00915775	0.217008	0.175862	0	0	0	0	0	0.0661442	0
ENSG00000067369	TP53BP1	0.348019	0.481374	0.432448	0.424571	0.361449	0.25866	0.435114	0.40671	0.414112	0.415858	0.437734	0.224469	0.334056	0.443655	0.508858	0.235732	0.220248	0.181973	0.301915	0.38497	0.561494	0.423673
ENSG00000173064	HECTD4	0.347947	0.354168	0.380544	0.299166	0.410695	0	0.275044	0.390452	0.289408	0.379691	0.335027	0.268971	0.163168	0.410315	0.407627	0.441969	0.321244	0.365321	0.438886	0.444438	0.375646	0.431167
ENSG00000089101	CFAP61	0.347838	0	0	0	0.238744	0	0	0	0.115694	0	0.0166998	0	0	0	0	0.0504936	0	0.151441	0	0.581128	0	0
ENSG00000118369	USP35	0.347511	0.422415	0.538259	0.622207	0	0	0.187013	0.368334	0.285957	0.256292	0.435523	0.216242	0	0.376712	0.370143	0.0404533	0.376738	0.307118	0.0293917	0.483455	0.358265	0.237198
ENSG00000136099	PCDH8	0.347439	0.559428	0.430225	0	0	0.0273034	0	0.179226	0.39724	0.0885944	0.105013	0.29174	0	0.349529	0.408876	0.496177	0.488188	0.142181	0.608444	0.704912	0.717486	0
ENSG00000148814	LRRC27	0.347277	0	0.562131	0.0747177	0	0	0.0378802	0.415698	0.0925862	0.37952	0.575915	0	0	0.503091	0.484969	0.312865	0.21468	0	0.202691	0.235033	0.281897	0.0364389
ENSG00000254402	LRRC24	0.346863	0.2543	0.360309	0	0.341644	0.247938	0	0.274653	0.224832	0.153155	0.0603894	0.225904	0.078877	0.399408	0.218058	0	0	0	0	0.287542	0.339216	0.277672
ENSG00000105971	CAV2	0.34685	0	0	0	0.0996565	0	0	0	0	0	0	0	0	0	0	0	0	0	0	0	0	0
ENSG00000198626	RYR2	0.346824	0.323125	0.331029	0.493792	0.339354	0.551884	0.0859874	0.487021	0.127748	0.162864	0.272677	0	0.546933	0.465372	0.331657	0.626557	0.325779	0.47562	0.640355	0.53839	0.277276	0.404676
ENSG00000169851	PCDH7	0.346631	0.377554	0.397312	0.619213	0	0.485775	0.45754	0.381796	0.411984	0.636216	0.11313	0.0472229	0.590743	0.422219	0.382423	0.483765	0	0.438223	0.292048	0.414107	0.318713	0.0856076
ENSG00000146872	TLK2	0.345933	0.29157	0.434496	0.23602	0.0875208	0	0.349509	0.341028	0.168958	0.100643	0.34153	0.29119	0.185649	0.537599	0.297372	0.0882563	0	0.120253	0.105563	0.159293	0.361265	0.297403
ENSG00000154380	ENAH	0.34565	0.361954	0.524973	0.47073	0.395838	0.218948	0.372815	0.433748	0.233464	0.14147	0.368469	0.320301	0.168783	0.52047	0.357449	0.109294	0.0335709	0.0629132	0.317847	0.291097	0.426193	0.441993
ENSG00000185198	PRSS57	0.345469	0	0	0	0	0	0	0	0	0	0	0	0	0	0	0.821433	0	0	0.161355	0.431959	0.320326	0
ENSG00000187068	C3orf70	0.345438	0.238911	0.0397929	0.00781555	0	0	0.293599	0	0	0	0	0	0	0.0328094	0	0	0	0	0	0.148805	0.179904	0.559236
ENSG00000187678	SPRY4	0.345366	0	0.344856	0	0	0.0261798	0.171196	0.00929405	0.187708	0.116201	0.14716	0	0	0.605806	0.576972	0	0	0	0	0	0.00159236	0.448156
ENSG00000128266	GNAZ	0.345068	0.369421	0.398675	0.414184	0.296218	0.121951	0.551827	0.393206	0.398636	0.360449	0.427715	0.135078	0.0286096	0.384884	0.412956	0.45572	0.405473	0.45368	0.496579	0.51314	0.438845	0
ENSG00000132535	DLG4	0.345019	0.350031	0.35582	0.202658	0.386344	0	0.335997	0.377146	0.425297	0.42306	0.429607	0.34689	0.162901	0.397254	0.397176	0.478064	0.389531	0.427096	0.527619	0.499559	0.361299	0.421159
ENSG00000167971	CASKIN1	0.344815	0.424223	0.404418	0.443904	0.423685	0.380467	0.419688	0.606055	0.359927	0.326485	0.435179	0.364579	0.38498	0.578485	0.386237	0	0	0.289682	0.410156	0	0.435685	0.44226
ENSG00000100077	GRK3	0.344696	0	0	0	0	0	0	0	0	0	0	0	0	0	0	0.228363	0.178334	0.283178	0.0824942	0.107233	0	0.417037
ENSG00000167632	TRAPPC9	0.34461	0.124675	0.294749	0.224927	0.369044	0.00955056	0.336196	0.199009	0	0.145863	0.195997	0	0.220696	0.358766	0.245811	0.189254	0.184008	0.189605	0.224603	0.300105	0.211213	0.326401
ENSG00000115266	APC2	0.344401	0.397085	0.352371	0.382909	0.34418	0	0.376797	0.425832	0.368244	0.381026	0.362026	0.377909	0.193829	0.431824	0.41111	0.269155	0.199562	0.00857438	0.337139	0.380767	0.414491	0.405538
ENSG00000101489	CELF4	0.344374	0.432584	0.378878	0.410331	0.351103	0.207317	0.351751	0.342779	0.449831	0.422129	0.417058	0.374287	0.211163	0.365812	0.42084	0.433431	0.394727	0.408063	0.443897	0.378195	0.394128	0.436621
ENSG00000130119	GNL3L	0.34437	0.426489	0.41339	0.640279	0.364777	0.349468	0.494038	0.450335	0.444625	0.406005	0.442982	0.417284	0.319893	0.461151	0.456726	0.385943	0.254375	0.429253	0.399559	0.343387	0.433931	0.451806
ENSG00000221946	FXYD7	0.344237	0.346323	0	0	0	0	0.202984	0.360297	0.558111	0.58699	0.468853	0.407941	0.263784	0	0.143355	0.297366	0.387824	0.455733	0.492817	0.366098	0	0.276049
ENSG00000119844	AFTPH	0.344196	0.249514	0.336058	0.321521	0.140358	0	0.281609	0.302255	0.0622003	0.321743	0.291302	0	0.169279	0.358784	0.282686	0.216844	0.158711	0.236568	0.236634	0.306252	0.189175	0.297624
ENSG00000104695	PPP2CB	0.344124	0.211386	0.320199	0.230097	0.142532	0	0.340293	0.0954284	0.267681	0.248059	0.324481	0.187356	0.0909759	0.317767	0.211904	0.300757	0.137618	0.223615	0.371597	0.156668	0.267606	0.160548
ENSG00000174898	CATSPERD	0.344029	0.355707	0	0.236522	0.176291	0	0	0.0770219	0.0316494	0	0.0727162	0.138984	0	0.525031	0.190741	0	0	0.579093	0.295958	0	0.164599	0.132487
ENSG00000078804	TP53INP2	0.343987	0.232427	0.201644	0.385025	0.471879	0.331618	0.296011	0.0601311	0	0.281931	0	0	0	0.263662	0.2555	0.0765048	0.000229938	0.251909	0.215024	0.279004	0.282213	0.171423
ENSG00000166167	BTRC	0.34378	0.360014	0.349192	0.34445	0.130491	0	0.199642	0.416207	0.273788	0.249882	0.320983	0.254814	0.307044	0.423102	0.380789	0.390601	0.333733	0.206811	0.388871	0.416119	0.365775	0.374044
ENSG00000100330	MTMR3	0.343734	0.210369	0.245421	0.162585	0.330554	0	0.119599	0.165152	0	0.133465	0.179494	0	0.117313	0.31293	0.174358	0.314674	0.222876	0.237581	0.397762	0.321284	0.175289	0.192867
ENSG00000182541	LIMK2	0.343691	0.379735	0.306182	0.253121	0.240961	0.130296	0.214259	0.351754	0.185741	0.0559794	0.344301	0.149817	0.217961	0.402949	0.356772	0.35376	0.113339	0.031036	0.271088	0.298958	0.363099	0.202044
ENSG00000176884	GRIN1	0.343669	0.326987	0.467684	0.473406	0.349596	0.228566	0.253982	0.597722	0.425331	0.445146	0.428683	0.371532	0.575438	0.501065	0.433421	0.521503	0.303812	0.420902	0.481675	0.688704	0.386724	0.39128
ENSG00000111540	RAB5B	0.343472	0.121994	0.26015	0.171911	0.345398	0	0.289443	0.317362	0.024554	0.159449	0.310734	0.128167	0	0.369062	0.37012	0.211546	0.132641	0.372471	0.347701	0.205983	0.289195	0.414077
ENSG00000182378	PLCXD1	0.343332	0.830265	0.717255	0.538428	0	0.0361798	0.341758	0.524073	0.550282	0.343623	0.78969	0.55869	0.432451	0.586577	0.861417	0.118894	0.406465	0.0834957	0	0.0583732	0.7848	0.518586
ENSG00000130939	UBE4B	0.343265	0.262007	0.359981	0.296112	0.288229	0	0.389348	0.374536	0.249928	0.132954	0.187991	0.178419	0.158226	0.363605	0.358441	0.307214	0.0580593	0.281174	0.347791	0.311489	0.288774	0.277873
ENSG00000095203	EPB41L4B	0.343116	0.423117	0.31212	0.388005	0	0	0	0.383072	0.509007	0.199224	0.449604	0.310505	0.247411	0.296031	0.500639	0.39962	0	0	0.186146	0.0910273	0.301095	0.0164746
ENSG00000126947	ARMCX1	0.34306	0.258796	0.0598059	0.383329	0.303911	0.121478	0.358695	0.221428	0.239272	0.364443	0.14045	0.0557333	0.195036	0.242379	0.193863	0.247252	0	0	0.1154	0.232021	0.220051	0.256107
ENSG00000105251	SHD	0.342932	0.55422	0.475336	0.332309	0.578823	0.31742	0.258755	0.405244	0.457777	0.435566	0.33238	0.371804	0.277134	0.668215	0.60551	0	0	0	0	0	0.435425	0.376048
ENSG00000186007	LEMD1	0.342901	0.221064	0.114052	0.353927	0.804563	0.418663	0	0	0.584012	0.170364	0.257194	0.579947	0	0.00170759	0.249419	0.398209	0	0.289155	0	0	0.338797	0
ENSG00000165084	C8orf34	0.342812	0.05784	0	0.00322392	0.360451	0	0	0.219063	0.0293497	0.543165	0.00845547	0	0.0960561	0.111797	0	0.612563	0.657414	0.6509	0.391279	0.594127	0.0597576	0.595547
ENSG00000099284	H2AFY2	0.342668	0	0	0	0	0	0	0	0	0	0	0	0	0	0	0	0	0	0	0	0.0292817	0
ENSG00000159363	ATP13A2	0.342639	0.389449	0.470264	0.397994	0.358091	0	0.382885	0.44349	0.224143	0.350094	0.396116	0.0360251	0.0126337	0.428324	0.346375	0.278428	0.0849046	0.177602	0.320086	0.453293	0.416402	0.375493
ENSG00000187147	RNF220	0.342579	0.127753	0.299034	0.327241	0.266007	0.267591	0.324595	0.24798	0.0660848	0	0.16497	0	0.0671123	0.328667	0.293148	0.10017	0.0920901	0.145708	0.263946	0.208283	0.209265	0.348069
ENSG00000105711	SCN1B	0.342511	0.415744	0.516249	0.349341	0.568994	0.346087	0	0.484313	0.232449	0.451264	0.363593	0.212476	0.485827	0.553727	0.406287	0.460449	0.319598	0.359138	0.536533	0.639729	0.422279	0.27267
ENSG00000158156	XKR8	0.342505	0.174492	0.0829825	0	0.00582852	0	0	0.258907	0.275169	0.0220522	0.546129	0	0	0.480437	0.275776	0	0	0	0	0	0.495418	0.113374
ENSG00000198853	RUSC2	0.342471	0.303376	0.556994	0.0974136	0.465194	0	0.247997	0.375507	0.216678	0.285195	0.172233	0	0.0735294	0.412698	0.311172	0.228436	0.118784	0.113759	0.26124	0.229421	0.349044	0.346585
ENSG00000140743	CDR2	0.342322	0.278685	0.170256	0.342319	0.23181	0.428982	0.230955	0.484857	0	0.00416344	0.223346	0	0.0668937	0.317143	0.0118759	0	0	0	0	0	0.201544	0
ENSG00000139970	RTN1	0.342277	0.387965	0.34857	0.341598	0.306937	0.189971	0.247168	0.353931	0.403161	0.385377	0.367669	0.306611	0.349765	0.342665	0.354139	0.412046	0.315377	0.313245	0.390243	0.40374	0.36632	0.332171
ENSG00000112624	BICRAL	0.342125	0.266682	0.397481	0.284987	0.332028	0	0.131633	0.524146	0.317471	0.198319	0.32583	0.176199	0.209446	0.356199	0.517545	0.291681	0.137352	0.343826	0.28976	0.412088	0.373759	0.22638
ENSG00000106609	TMEM248	0.341578	0.269132	0.231522	0.263317	0.0830646	0	0.345951	0.37786	0.233689	0.0230926	0.330781	0	0.0608957	0.392841	0.433893	0.21648	0	0.0172004	0.174204	0.31015	0.254751	0.0460985
ENSG00000065559	MAP2K4	0.341429	0.387622	0.4247	0.661474	0.413839	0.0166106	0.561025	0.434957	0.43813	0.415879	0.447111	0.350572	0.271311	0.43608	0.416384	0.390206	0.376263	0.43997	0.483342	0.399644	0.416488	0.407548
ENSG00000143333	RGS16	0.341134	0	0	0	0	0	0	0	0.142764	0.635619	0	0	0	0	0	0	0	0	0	0	0	0.864915
ENSG00000111052	LIN7A	0.340743	0.146747	0.202829	0.157073	0.359936	0.286237	0	0.151886	0.544689	0.706151	0.0501221	0.206727	0.129078	0.334112	0.34313	0.512103	0.490848	0.452573	0.312189	0.363156	0.45115	0.330368
ENSG00000157540	DYRK1A	0.340733	0.262287	0.289124	0.292513	0.234803	0	0.323267	0.34176	0.104106	0.183024	0.329523	0.0548375	0.0258021	0.36743	0.410883	0.365085	0.213874	0.370932	0.332464	0.291727	0.365089	0.329347
ENSG00000123360	PDE1B	0.340256	0.58669	0.543065	0.155279	0.587576	0	0	0.384825	0.0550547	0.247186	0.124947	0.188501	0.555218	0.647058	0.561552	0.444481	0.0445505	0.257081	0	0	0.277782	0.185379
ENSG00000049769	PPP1R3F	0.339868	0.389943	0.510326	0.503236	0.475173	0	0	0.406493	0.430183	0.452452	0.530462	0.431204	0.422784	0.418755	0.403115	0.199753	0	0.19589	0.3318	0.32489	0.411013	0.268628
ENSG00000198794	SCAMP5	0.339599	0.216149	0.374929	0.355813	0.421904	0.122372	0.360961	0.336976	0.222544	0.175321	0.273128	0.179038	0.188035	0.431899	0.419408	0.367138	0.177167	0.357214	0.404016	0.530669	0.398643	0.405713
ENSG00000137312	FLOT1	0.339519	0	0	0	0.294495	0	0.222904	0	0.079273	0.084674	0.0364055	0	0	0	0	0.279107	0.382962	0.232207	0.308808	0.284599	0.00433475	0.243251
ENSG00000170852	KBTBD2	0.339491	0.374022	0.553697	0.343382	0.292258	0.17525	0.383332	0.316938	0.15646	0.220878	0.241173	0.05183	0.120856	0.494207	0.389683	0.123054	0	0.132423	0.240513	0.240236	0.419888	0.344494
ENSG00000162188	GNG3	0.339384	0.433281	0.378522	0.313612	0.378868	0.200904	0.223611	0.398788	0.457397	0.452336	0.438543	0.41327	0.281995	0.411742	0.424501	0.424494	0.356799	0.348849	0.422414	0.328855	0.406683	0.429793
ENSG00000148343	MIGA2	0.339274	0.361588	0.598193	0.372674	0.499922	0	0.0301407	0.472952	0.275735	0.401606	0.358659	0.2973	0.0891711	0.645322	0.616512	0.297428	0.0692079	0.256311	0.302495	0.491291	0.415157	0.396295
ENSG00000143390	RFX5	0.339175	0.540052	0.297355	0.668765	0.215832	0.216608	0.296472	0.573347	0.403058	0.298577	0.387237	0.30957	0.640481	0.429781	0.521184	0	0	0.137977	0	0	0.324189	0.312818
ENSG00000134709	HOOK1	0.33908	0.081279	0.0557007	0.308568	0.13104	0	0.294776	0.116974	0.593766	0.525091	0.342263	0.21834	0.489284	0.248347	0.335145	0.593546	0.421866	0.448465	0.204574	0.455103	0.0598461	0.33685
ENSG00000184898	RBM43	0.339045	0.312109	0.319326	0.221194	0	0	0.37009	0.379926	0.344315	0.299951	0.613763	0.410533	0.418569	0.326433	0.283507	0	0	0.14789	0.203613	0.0531439	0.206699	0.210258
ENSG00000163935	SFMBT1	0.338764	0.398187	0.338862	0.217191	0.338584	0	0.0657417	0.345033	0.0804668	0	0.294625	0.109118	0.559417	0.423906	0.265863	0.336695	0.248641	0.273286	0.270998	0.261891	0.321992	0.106939
ENSG00000112309	B3GAT2	0.33864	0.23205	0.30617	0.0725577	0	0	0	0	0.247585	0	0.158556	0.359345	0	0	0.0127927	0	0.516066	0	0.713648	0	0.215473	0
ENSG00000158258	CLSTN2	0.338434	0.346716	0.413658	0.415463	0	0	0.443868	0.372149	0.361506	0.195066	0.243489	0.262363	0	0.431713	0.444885	0.358802	0.461382	0.499457	0.72243	0.435766	0.381935	0
ENSG00000144229	THSD7B	0.338433	0	0.368935	0.592137	0	0	0	0.376952	0	0.251889	0.243467	0.387348	0	0.221677	0.576358	0	0	0	0.543781	0	0.282399	0
ENSG00000142892	PIGK	0.338063	0.342976	0.417353	0.256963	0.382886	0.0591884	0.280088	0.425173	0.280235	0.0343242	0.305056	0.123752	0.228423	0.387539	0.381954	0.213715	0.211845	0	0.296816	0.359337	0.428003	0.304211
ENSG00000139200	PIANP	0.338001	0.37549	0.384026	0.415856	0.258794	0.151579	0.399032	0.382415	0.443185	0.389456	0.456182	0.359412	0.188332	0.359	0.449428	0.437788	0.39357	0.423126	0.404568	0.576977	0.44219	0.410517
ENSG00000179796	LRRC3B	0.337733	0.395326	0.396971	0.205155	0	0	0	0.43767	0.564655	0.574687	0.517843	0.430877	0.061631	0.528353	0.549753	0.242737	0	0.364266	0	0	0.281957	0.420372
ENSG00000178719	GRINA	0.33761	0.222411	0.333337	0.308705	0.286855	0.120374	0.238318	0.325996	0.121619	0.16494	0.289648	0.160481	0.0783422	0.355019	0.313545	0.297232	0.11244	0.190161	0.292176	0.364846	0.289916	0.2768
ENSG00000160991	ORAI2	0.337081	0.329297	0.164971	0.079991	0.360007	0	0	0.468809	0.301566	0.557038	0.213528	0.155859	0.452126	0.0707153	0.327965	0.544452	0.38445	0.413452	0.789867	0	0.000132696	0.0446275
ENSG00000054277	OPN3	0.336872	0.256527	0.0100505	0.171834	0	0	0	0.23422	0.0403317	0	0.106053	0	0	0.0150452	0.0447722	0	0.299116	0.720728	0	0.839533	0	0
ENSG00000146151	HMGCLL1	0.336857	0.342961	0.507944	0.263019	0.271605	0.327621	0.6267	0.231741	0.131647	0.303581	0.19355	0.115483	0.179221	0.303326	0.213675	0.187326	0.317688	0	0.0449293	0.306917	0.362427	0.39111
ENSG00000183741	CBX6	0.336774	0.351094	0.376591	0.300142	0.323581	0.0829479	0.178112	0.38578	0.399036	0.369981	0.367516	0.330265	0.296562	0.383454	0.367452	0.400172	0.275093	0.315639	0.399423	0.360903	0.370539	0.240682
ENSG00000130643	CALY	0.336616	0.430222	0.294236	0.251433	0.155338	0	0.0687241	0.320892	0.461686	0.431546	0.425174	0.361103	0.329678	0.177882	0.363583	0.456234	0.403392	0.283685	0.425759	0.419001	0.403273	0.259471
ENSG00000172932	ANKRD13D	0.33658	0.384004	0.511075	0.344012	0.451836	0	0.307765	0.467855	0.415081	0.435247	0.411462	0.0966917	0	0.437918	0.404623	0.393871	0.343468	0.362798	0.385213	0.416233	0.412502	0.39347
ENSG00000153395	LPCAT1	0.336448	0	0.178804	0.198292	0.0348919	0	0.319252	0.0336806	0	0	0.310377	0.0764653	0	0.0255739	0.270671	0.284769	0	0.0864153	0.220579	0.21397	0.230286	0.386361
ENSG00000168724	DNAJC21	0.336241	0.460565	0.393984	0.626792	0.291033	0	0.354388	0.471288	0.201968	0.226899	0.389629	0.0850814	0.0778743	0.41414	0.314704	0	0	0	0.17364	0	0.323205	0
ENSG00000172260	NEGR1	0.336212	0.0428875	0	0.429938	0	0.343441	0.365428	0.303699	0.620509	0.448767	0.403342	0.376296	0.398035	0.0718979	0.297752	0.618382	0.428071	0.384135	0.306345	0.379574	0.356703	0.221969
ENSG00000152670	DDX4	0.336089	0.514868	0	0.0791472	0	0	0	0.220102	0	0	0	0	0	0	0.681954	0.131228	0	0.392068	0.603177	0.0911267	0	0.0357085
ENSG00000102531	FNDC3A	0.336018	0.0404122	0.21165	0.508862	0	0	0.576628	0.198236	0.355085	0	0.277077	0	0	0.0928637	0.358967	0.22875	0	0	0.152418	0.177835	0.144761	0.273209
ENSG00000133275	CSNK1G2	0.33594	0.208517	0.298418	0.255291	0.337989	0	0.402484	0.195811	0.0277192	0	0.255969	0	0	0.225232	0.285711	0.286645	0	0.209625	0.393032	0.302366	0.210376	0.238142
ENSG00000182220	ATP6AP2	0.335906	0.310706	0.356352	0.39445	0.157869	0.295419	0.372945	0.166835	0	0	0	0	0	0.224254	0.216433	0.281389	0.242888	0.14466	0.24531	0.396987	0.351428	0.094954
ENSG00000136367	ZFHX2	0.335853	0.129939	0.260756	0.508858	0.026113	0	0.574708	0.293913	0.269212	0.265155	0.435774	0.204426	0.0514706	0.304508	0.103998	0.268216	0.149874	0.351031	0.362553	0.411195	0.0446745	0.149587
ENSG00000118873	RAB3GAP2	0.335711	0.250217	0.324073	0.364228	0	0	0.372929	0.280013	0.0735181	0.153481	0.095664	0.143654	0.274891	0.392738	0.163593	0.237569	0.0466199	0.207163	0.247726	0.301002	0.402545	0.330568
ENSG00000183092	BEGAIN	0.335616	0.31246	0.40886	0.642242	0.180889	0	0.637815	0.576309	0.519261	0.199263	0.611592	0.390846	0.275397	0.413936	0.638088	0.402512	0.39021	0.475263	0.498485	0.403918	0.424849	0.37541
ENSG00000109832	DDX25	0.335476	0.46396	0.432445	0.122297	0.432973	0	0.128057	0.348648	0.340147	0.402114	0.351124	0.412046	0.162243	0.41603	0.387715	0.316443	0.276588	0.0418216	0.308576	0.236221	0.396315	0.419151
ENSG00000160007	ARHGAP35	0.335346	0.203056	0.218751	0.169498	0.307631	0	0.38553	0.2831	0.150172	0.15391	0.210795	0.0641157	0.21047	0.371077	0.31918	0.302503	0.229227	0.203404	0.327471	0.322032	0.294876	0.312865
ENSG00000139197	PEX5	0.335148	0.147105	0.139035	0	0.45269	0	0.0255007	0.22658	0.0510742	0.0455931	0.00108042	0.0224597	0	0.255148	0.156077	0.165635	0	0.252519	0.135279	0.279499	0.285402	0.52105
ENSG00000124194	GDAP1L1	0.334975	0.371929	0.373505	0.131591	0.376735	0.0138772	0.441025	0.224033	0.343335	0.376819	0.326018	0.143532	0.107152	0.397296	0.361592	0.352667	0.325053	0.313572	0.398702	0.388718	0.393279	0.441309
ENSG00000117411	B4GALT2	0.334934	0.0753182	0.236662	0.189814	0.250324	0	0	0.239631	0.133285	0.0281274	0.199524	0.0371769	0	0.205217	0.234707	0.535738	0	0.343627	0.586716	0.323698	0.306785	0.313435
ENSG00000129951	PLPPR3	0.33472	0.560613	0.446029	0.282228	0.338066	0	0.133491	0.432459	0.606707	0.439933	0.404407	0.378524	0.241523	0.475631	0.494908	0.37432	0.0786527	0.185232	0.155969	0.348045	0.452751	0.450184
ENSG00000161813	LARP4	0.334701	0.0745416	0.224671	0.349837	0.346332	0.0922019	0.472874	0.270655	0	0	0	0	0	0.30624	0.153348	0.0279298	0	0	0.1098	0	0.261422	0.156714
ENSG00000033100	CHPF2	0.33452	0.137217	0.313814	0.188142	0.378119	0	0.336449	0.366836	0.0295415	0	0.0303457	0.0514461	0.027139	0.305765	0.30899	0.378356	0.309831	0.324464	0.314989	0.542753	0.263544	0.370028
ENSG00000173020	GRK2	0.334448	0.228445	0.281904	0.419017	0.310485	0.0173465	0.360477	0.22256	0.306718	0.325198	0.38641	0.0696186	0.164565	0.383275	0.358016	0.278609	0	0.359386	0.416599	0.273413	0.32349	0.371587
ENSG00000196950	SLC39A10	0.334397	0.200294	0	0.289606	0	0	0	0	0.119425	0.044055	0.0419485	0.14378	0.0524064	0.0681554	0	0.596724	0.0316165	0.362532	0.28369	0.431913	0	0
ENSG00000198700	IPO9	0.334286	0.33998	0.367166	0.329149	0.228714	0	0.317515	0.416681	0.239297	0.370937	0.254562	0.336469	0.121591	0.40525	0.315102	0.26317	0.259646	0.186536	0.375678	0.323185	0.348356	0.349857
ENSG00000127252	HRASLS	0.334133	0.566517	0.604255	0.191281	0.173719	0	0.354274	0.571933	0.678767	0.356322	0.732911	0.327865	0.00106952	0.622741	0.51317	0.0681346	0	0	0	0.200838	0.60962	0
ENSG00000105696	TMEM59L	0.334036	0.458906	0.457635	0.36107	0.442028	0.0853659	0.323325	0.458616	0.454575	0.4275	0.465485	0.442694	0.380629	0.465302	0.45026	0.393748	0.312552	0.22635	0.402517	0.432896	0.423063	0.381468
ENSG00000179222	MAGED1	0.333939	0.419895	0.418331	0.173988	0.223878	0	0.222441	0.35346	0.36192	0.357222	0.363438	0.203161	0.212111	0.399345	0.369493	0.284927	0.222853	0.137965	0.238914	0.393618	0.389447	0.324212
ENSG00000013016	EHD3	0.333469	0.27043	0.418904	0.347501	0.37916	0.0168209	0.334529	0.384053	0.0832534	0.240961	0.238711	0.106668	0	0.418567	0.390617	0.228288	0.0350655	0.425558	0.48411	0.361058	0.385108	0.467773
ENSG00000105341	DMAC2	0.333368	0.309578	0.542159	0.231367	0.448283	0	0.147366	0.410729	0.241897	0.336999	0.275921	0.343789	0.0318182	0.556554	0.386593	0.186085	0.0919172	0.0775285	0.183887	0.233473	0.44105	0.367523
ENSG00000143442	POGZ	0.333358	0.181627	0.0229054	0.241218	0	0	0.182336	0.225607	0.184075	0.10574	0.121755	0.0517661	0.234167	0.111031	0.132655	0.287339	0.0921185	0.395501	0.266043	0.257687	0.105513	0.0995572
ENSG00000094631	HDAC6	0.333214	0.155431	0.303893	0.302799	0.189175	0.150562	0.281765	0.352917	0.298358	0.402032	0.349553	0.0379931	0	0.318563	0.473041	0.310311	0.308489	0.219879	0.318203	0.337009	0.334574	0.562466
ENSG00000014824	SLC30A9	0.333047	0.405946	0.423319	0.341088	0.381821	0.119533	0.369132	0.401456	0.366614	0.363544	0.381996	0.232658	0.0924465	0.434913	0.420898	0.281681	0.169694	0.264682	0.377632	0.217035	0.393989	0.283017
ENSG00000048707	VPS13D	0.332616	0.195136	0.394074	0.18878	0.494025	0.0448421	0.17683	0.340719	0.0464704	0.0382455	0.0799566	0	0	0.348303	0.351707	0.32564	0.322493	0.208867	0.39433	0.360611	0.371947	0.342217
ENSG00000185973	TMLHE	0.332244	0	0	0	0	0	0	0	0.523016	0	0	0.0180041	0	0.0146299	0	0	0	0	0	0	0	0
ENSG00000121879	PIK3CA	0.332215	0.191048	0.319295	0.512459	0.147305	0.388792	0.398495	0.29679	0.0902551	0.274847	0.0838501	0.124968	0.281471	0.316587	0.156929	0	0	0.0115186	0.000441566	0.205773	0.308954	0.291485
ENSG00000119965	C10orf88	0.33196	0.0188422	0.0436428	0.292817	0.268578	0	0.286674	0.00651159	0.00119893	0.246412	0.132961	0.275747	0.0658422	0.237493	0.185792	0.192103	0.0173202	0	0.27967	0.245493	0.203662	0.324454
ENSG00000102606	ARHGEF7	0.331745	0.156621	0.240085	0.232225	0.159414	0.114219	0.374974	0.131193	0	0	0.221489	0.138648	0.137701	0.172783	0.0988992	0.406944	0.187053	0.299267	0.374916	0.391869	0.313268	0.273724
ENSG00000106688	SLC1A1	0.331653	0	0.359071	0.0250586	0.0236094	0	0.0557874	0.118197	0.062488	0.400374	0.016817	0	0.0764706	0.308328	0.1719	0.484138	0.390582	0.353967	0.40457	0.828081	0.348461	0.209654
ENSG00000224531	SMIM13	0.331356	0.247867	0.426156	0.426182	0.330007	0.287592	0.350642	0.182058	0.032323	0.128873	0.264556	0.0474149	0.195741	0.36975	0.303312	0.531435	0.286231	0.465788	0.474535	0.578147	0.362829	0.387867
ENSG00000139266	2020-03-09	0.331196	0.320006	0.354131	0.209142	0.264482	0	0.15708	0.368122	0.163041	0	0.29621	0.0475971	0.104401	0.415283	0.371256	0.350117	0	0.300758	0.427777	0.396792	0.401221	0.510576
ENSG00000131067	GGT7	0.330907	0.266084	0.399486	0.266166	0.409453	0.0390034	0.242395	0.320945	0.157178	0.223824	0.208171	0.0611723	0.164367	0.41888	0.306045	0.366703	0.355121	0	0.357993	0.558465	0.35698	0.334492
ENSG00000181754	AMIGO1	0.330901	0.32671	0.515832	0.230865	0.423241	0.144162	0.127288	0.434279	0.10395	0.293993	0.234991	0	0.38782	0.392298	0.311398	0.386149	0.065601	0.367655	0.282323	0.448539	0.451616	0.484055
ENSG00000138074	SLC5A6	0.330766	0.352069	0.457103	0.207456	0.252074	0.312586	0.346889	0.288011	0	0.264461	0.080983	0.138297	0	0.39728	0.40334	0	0	0	0	0.0221803	0.385061	0.301323
ENSG00000175662	TOM1L2	0.330754	0.351283	0.406109	0.250614	0.409849	0.122267	0.374542	0.416883	0.0833014	0	0.311719	0.0268748	0.137968	0.446163	0.381584	0.23551	0.308288	0.306011	0.355775	0.233969	0.316215	0.398068
ENSG00000155897	ADCY8	0.330699	0.135186	0.558753	0	0.404532	0	0	0.254958	0.334366	0.316093	0	0.092866	0.283749	0.260523	0.340303	0.3009	0	0.252125	0	0.526743	0.343882	0
ENSG00000184992	BRI3BP	0.330486	0.505725	0.612039	0.398881	0.42393	0.306071	0.0884259	0.565642	0.390921	0.324338	0.381253	0.378667	0.356138	0.620499	0.573571	0.379758	0.117693	0.35381	0.412319	0.584139	0.432803	0.463415
ENSG00000009694	TENM1	0.330456	0.342923	0.431834	0.637604	0	0.272556	0.551588	0.3753	0.593604	0.528016	0.423319	0.0591886	0.260476	0.257553	0.0505882	0.432201	0.446225	0.613583	0	0.0983566	0.442736	0.282441
ENSG00000070610	GBA2	0.330368	0.339942	0.464315	0.136886	0.411888	0	0	0.382474	0.360344	0.21689	0.29004	0.134648	0.315083	0.505334	0.459361	0.35855	0.239313	0.142119	0.178583	0.567297	0.398633	0.149971
ENSG00000168016	TRANK1	0.330315	0.383066	0.485053	0.412026	0.451995	0.365398	0.371136	0.49721	0.274336	0.298228	0.335887	0.237012	0.553326	0.363415	0.624595	0.633101	0.414272	0.261189	0.297377	0.597731	0.419979	0
ENSG00000008283	CYB561	0.329694	0.401725	0.218499	0.249369	0.390488	0	0.433074	0.252072	0.434124	0.335887	0.398282	0.209843	0.276745	0.237705	0.42971	0.433342	0.435259	0.449734	0.152599	0.620805	0.336824	0.104897
ENSG00000160957	RECQL4	0.329635	0	0.394462	0	0	0	0	0	0	0.342296	0	0.0952787	0.297728	0	0	0	0	0.0738636	0.0123271	0	0	0
ENSG00000140386	SCAPER	0.32953	0	0	0.274117	0	0.16128	0.377285	8.9815e-05	0.212146	0.0996026	0.0907479	0.0170207	0	0	0	0.308485	0.186521	0.332822	0.204553	0.148835	0.0620936	0.212153
ENSG00000253457	SMIM18	0.329146	0.399444	0.385443	0.0816669	0.318764	0	0	0.00375717	0.462865	0.24174	0.312586	0.377206	0	0	0.311639	0.313959	0.188394	0	0.070577	0	0.426725	0.299913
ENSG00000165887	ANKRD2	0.329081	0.302527	0	0	0	0	0.492527	0.0431086	0.147913	0	0.60935	0.0283466	0	0	0	0	0.161335	0.0601732	0.0695704	0	0.76967	0
ENSG00000003987	MTMR7	0.328978	0.334591	0.598343	0.339402	0.374187	0.0826966	0.302677	0.384046	0.228015	0.314174	0.139577	0.068853	0.394566	0.388944	0.310908	0.377363	0.379497	0.223008	0.21379	0.340419	0.392678	0.059151
ENSG00000184378	ACTRT3	0.328971	0.74183	0.884626	0.800898	0.467189	0	0	0.715558	0.186549	0	0.443307	0.852643	0	0.506981	0.59412	0	0.115492	0	0.268918	0	0.336814	0
ENSG00000058804	NDC1	0.328897	0.108096	0.0852563	0	0.0181118	0	0.189175	0.403247	0	0	0.235992	0.0026235	0.0227273	0.225503	0.00400522	0	0	0	0.14198	0.192725	0.194747	0.201099
ENSG00000186908	ZDHHC17	0.328556	0.320735	0.443367	0.269164	0.159828	0.0530908	0.121852	0.359065	0.185011	0.280615	0.230151	0.100973	0.195256	0.403583	0.411228	0.283097	0.0292021	0.124073	0.318534	0.37982	0.358255	0.295834
ENSG00000139725	RHOF	0.328499	0.439539	0.393554	0.408204	0.420303	0.560755	0.151005	0.450759	0.507318	0.548663	0.470389	0.353033	0.226091	0.436346	0.434799	0.461123	0.426563	0.430628	0.428761	0.393573	0.482249	0.498377
ENSG00000171433	GLOD5	0.328489	0	0.501693	0	0	0	0	0.666068	0	0.11593	0.0483853	0.376513	0.472358	0.312769	0.348377	0	0	0.270105	0	0	0.8293	0.508079
ENSG00000169255	B3GALNT1	0.328463	0.21841	0.310813	0.40594	0.00622318	0	0.431886	0.279592	0.0151065	0.0825927	0.0283728	0.0306501	0	0.125053	0.233393	0.34334	0.129654	0.341799	0.194351	0.404025	0.356931	0.136496
ENSG00000152291	TGOLN2	0.328381	0.314502	0.374372	0.597796	0.220525	0	0.417055	0.386579	0.136773	0.0928544	0.337482	0.276959	0.126872	0.371709	0.387383	0.0880413	0.0443205	0.182657	0.0852047	0.306504	0.264231	0.356926
ENSG00000130294	KIF1A	0.328308	0.359779	0.369258	0.281313	0.331546	0.073381	0.25565	0.357427	0.29647	0.353145	0.327998	0.235603	0.212166	0.377083	0.368467	0.350342	0.219591	0.284878	0.336976	0.367619	0.374609	0.351733
ENSG00000114573	ATP6V1A	0.328256	0.369862	0.402206	0.389583	0.342187	0.232653	0.327574	0.360468	0.367348	0.351545	0.357534	0.245458	0.177674	0.389136	0.385177	0.392324	0.313313	0.371815	0.422236	0.351231	0.387151	0.376619
ENSG00000125354	2020-09-06	0.32806	0.437296	0.392941	0.396552	0.376889	0.277079	0.442192	0.428115	0.189842	0.331623	0.37838	0.386904	0.302105	0.46142	0.44148	0.174905	0	0.282409	0.369451	0.423835	0.418243	0
ENSG00000183114	FAM43B	0.327939	0.459704	0.564879	0.272674	0.374691	0	0.540955	0.613797	0.307876	0.176711	0.339738	0.339525	0.182775	0.54609	0.339415	0.308712	0.502706	0.415334	0.32234	0.449088	0.386939	0.428995
ENSG00000106992	AK1	0.327854	0.27938	0.352561	0.0933959	0.320827	0.0428932	0	0.261903	0.364353	0.359869	0.30385	0.0851037	0.0719251	0.386243	0.376741	0.110178	0.139285	0.0642562	0.0467937	0.256966	0.343086	0.247694
ENSG00000133083	DCLK1	0.327785	0.170201	0.168136	0.261807	0	0.209945	0.295246	0.191316	0.237253	0.165942	0.0507798	0.0609803	0.0285428	0.0306886	0.248473	0.537859	0.325697	0.412938	0.292043	0.598062	0.310595	0.3282
ENSG00000150768	DLAT	0.327655	0.410755	0.435356	0.288232	0.436397	0.0764298	0.338199	0.387011	0.353928	0.200676	0.320782	0.123176	0.253866	0.447096	0.419135	0.255221	0.158182	0.376832	0.413433	0.307876	0.428079	0.413966
ENSG00000165061	ZMAT4	0.327613	0	0.38918	0.278661	0.470322	0.464428	0	0.142954	0	0	0.288392	0	0.233651	0.325915	0.259772	0	0	0	0	0.191438	0.0557767	0
ENSG00000100280	AP1B1	0.327323	0.418117	0.517805	0.405386	0.542938	0.400846	0.37509	0.447789	0.366518	0.399737	0.420407	0.373766	0.281627	0.547339	0.416586	0.34229	0.334538	0.277718	0.273141	0.336571	0.41117	0.422256
ENSG00000116237	ICMT	0.327311	0.116187	0.3394	0.0827445	0.16357	0	0.356862	0.249786	0	0.19849	0	0	0	0.257611	0.253255	0.321983	0	0.105672	0.20462	0.363113	0.299253	0.130446
ENSG00000007202	KIAA0100	0.327056	0.300256	0.614985	0	0.371182	0	0	0.368723	0.0980721	0.0931448	0.246706	0.216437	0.0834225	0.543701	0.427119	0.253911	0.121368	0.0254649	0.305399	0.0835277	0.552969	0.264139
ENSG00000142002	DPP9	0.326983	0.208614	0.319044	0.17316	0.350031	0.118502	0.308201	0.478793	0	0.230626	0.103257	0	0.147144	0.388221	0.316217	0.27791	0.110285	0.380185	0.336037	0.347186	0.239921	0.283843
ENSG00000177511	ST8SIA3	0.326902	0.401034	0.384212	0.69279	0.0148183	0.109508	0.527924	0.314277	0.422993	0.359856	0.393447	0.303075	0.0218583	0.285914	0.415732	0.421804	0.303491	0.446657	0.473827	0.493158	0.322965	0.42151
ENSG00000164742	ADCY1	0.326486	0	0	0	0	0.512863	0	0	0	0.0637103	0	0	0.297401	0.14285	0	0.580795	0.447125	0.599477	0	0.791074	0	0
ENSG00000198793	MTOR	0.325988	0.345648	0.438215	0.290652	0.389972	0	0.200981	0.376367	0.0790003	0.284623	0.317068	0.0621321	0.213579	0.378669	0.36458	0.35086	0.147887	0.286888	0.291538	0.363243	0.395867	0.316448
ENSG00000102780	DGKH	0.325672	0	0	0	0	0	0	0	0	0	0	0	0.166562	0	0	0.0393294	0	0	0.0616191	0.539865	0	0
ENSG00000126773	PCNX4	0.32562	0.0667307	0.209107	0.28781	0.223156	0.0374157	0.359734	0.269578	0.249293	0.307379	0.21659	0.0595726	0.266202	0.126653	0.201272	0.327379	0	0.116512	0.178643	0.199681	0.256505	0.286474
ENSG00000188157	AGRN	0.325568	0.0636997	0	0.0221766	0	0.0010513	0	0.0199389	0.0417706	0	0.0441563	0	0	0.0556387	0.0652141	0.0763532	0	0	0.252009	0.0724664	0	0.0444861
ENSG00000134265	NAPG	0.325541	0.331811	0.339586	0.35514	0.352125	0.050778	0.256177	0.381515	0.361631	0.329763	0.352273	0.226987	0.293259	0.39148	0.370551	0.425957	0.328129	0.401914	0.426396	0.401952	0.339374	0.301023
ENSG00000142599	RERE	0.32546	0.0924429	0.204495	0.253229	0.0654576	0.0657065	0.366728	0.187176	0.109566	0.0626452	0.223494	0	0.00040107	0.230032	0.230641	0.0180579	0.0123017	0.0360021	0.335553	0	0.126362	0.312485
ENSG00000145349	CAMK2D	0.325358	0.319619	0.295077	0.440331	0.420553	0.18919	0.176491	0.420731	0.495045	0.451562	0.40345	0.189832	0.296944	0.334699	0.380906	0.507611	0.450335	0.433734	0	0	0.433028	0.374234
ENSG00000183044	ABAT	0.325333	0.489009	0.642653	0.353794	0.162406	0.31566	0.397929	0.427995	0.0371667	0.0661793	0.245966	0.193121	0.145321	0.602354	0.591953	0	0	0	0	0.103108	0.625554	0.67615
ENSG00000130150	MOSPD2	0.325322	0	0	0	0	0	0.41216	0	0	0	0	0	0	0	0	0	0	0	0	0	0	0
ENSG00000189369	GSPT2	0.324938	0.367119	0.522291	0.610587	0	0	0.412034	0.336655	0.16909	0.267116	0.380813	0	0	0.305174	0.319414	0.299235	0.288108	0	0.188035	0.288288	0.313481	0.0995318
ENSG00000198933	TBKBP1	0.324547	0.0592852	0.309494	0.275053	0.396144	0.374009	0.247122	0.306119	0	0	0.32583	0.327128	0.014639	0.524279	0.299027	0.143035	0	0	0.311103	0.157724	0.289451	0.170512
ENSG00000212864	RNF208	0.324461	0.434009	0.440234	0.45155	0.478364	0.234213	0.257291	0.537655	0.443269	0.393415	0.530065	0.400044	0.401227	0.449272	0.442623	0.404601	0.325413	0.397513	0.409336	0.397794	0.418816	0.400638
ENSG00000183087	GAS6	0.324391	0.332485	0.508655	0.0461606	0.337732	0.0831108	0	0.418558	0	0.137684	0.167587	0.158833	0.113235	0.477367	0.382093	0	0	0.0506395	0	0.601504	0.320683	0.0698281
ENSG00000135763	URB2	0.324229	0.418598	0.22505	0	0	0	0.0104785	0.173152	0	0.0164399	0	0	0.42975	0.111101	0	0.124025	0.136122	0	0.130921	0.344779	0	0.271151
ENSG00000103066	PLA2G15	0.324189	0	0.0326642	0	0	0	0.165474	0	0	0	0	0	0	0	0	0.147394	0	0	0	0.271657	0	0.207953
ENSG00000111731	C2CD5	0.32379	0.262352	0.269654	0.320927	0.305067	0	0.27308	0.123679	0.300262	0.209974	0.264942	0.00236755	0.0631684	0.275218	0.303475	0.439035	0.405934	0.202371	0.398893	0.452019	0.336079	0.140442
ENSG00000196715	VKORC1L1	0.32356	0.266597	0.192687	0.276073	0	0	0.387803	0.159966	0	0.0310806	0.0591883	0.0371129	0	0.312136	0.353873	0.287023	0	0.277174	0.313808	0.493598	0.307198	0.260925
ENSG00000123091	RNF11	0.323533	0.308358	0.258776	0.412735	0.307449	0.275308	0.382927	0.251417	0.382346	0.32693	0.371167	0.237042	0.0563503	0.347279	0.390648	0.31863	0.115659	0.361824	0.321727	0.200463	0.349664	0.446585
ENSG00000144136	SLC20A1	0.322916	0.350022	0.559606	0.376303	0.550044	0	0.177418	0.342591	0.0222041	0.309718	0.178324	0	0.0231952	0.463669	0.240661	0.106762	0	0.371606	0.17048	0.682255	0.357931	0
ENSG00000186094	AGBL4	0.322823	0.198577	0.459068	0.201882	0	0.845927	0.466121	0.224907	0.319945	0.189389	0.532756	0.342735	0	0.410937	0.407063	0.308687	0.31032	0.266935	0.308999	0.755955	0.571359	0
ENSG00000102096	PIM2	0.322694	0	0.25891	0.355918	0.294672	0	0.556344	0.363914	0.297475	0.319519	0.382559	0.349194	0	0.315155	0.161061	0.424241	0.283355	0.413285	0.395945	0.351122	0.264312	0.400737
ENSG00000074317	SNCB	0.322461	0.447506	0.431572	0.336902	0.410476	0.238225	0.213907	0.432861	0.45525	0.490882	0.444424	0.418269	0.417338	0.448633	0.452987	0.445878	0.375102	0.378596	0.413709	0.397571	0.426686	0.432475
ENSG00000166257	SCN3B	0.322279	0.0955243	0.0603657	0.407153	0	0	0.459958	0	0.411058	0	0.263166	0.31113	0	0	0.171682	0.578279	0.32168	0.419579	0.622917	0.287348	0.363823	0.461701
ENSG00000071553	ATP6AP1	0.322245	0.239018	0.300521	0.234553	0.216689	0.177565	0.119917	0.244155	0.0844044	0.12287	0.127537	0.141413	0.150201	0.323133	0.240179	0.268638	0.169004	0.208909	0.285967	0.379174	0.279828	0.266501
ENSG00000149428	HYOU1	0.322121	0.405258	0.513963	0.203107	0.274489	0	0.34829	0.572548	0.34376	0.334867	0.604468	0.35868	0.035361	0.577258	0.631436	0.140992	0	0	0.318008	0.183324	0.413043	0.00206947
ENSG00000114544	SLC41A3	0.321892	0.371563	0.252076	0.157868	0.206687	0.30113	0.0539688	0.391431	0	0.235895	0.263173	0.27097	0	0.311315	0.000920622	0	0	0	0	0	0.163262	0.167587
ENSG00000111269	CREBL2	0.321438	0.601998	0.481721	0.679138	0.309367	0.0308989	0.585769	0.612701	0.358753	0.372819	0.583705	0.580502	0.517192	0.653926	0.645006	0	0	0	0.0377539	0.0535629	0.496519	0.320898
ENSG00000166454	ATMIN	0.321209	0.376581	0.60113	0.572421	0.398254	0	0.430312	0.513278	0.392394	0.192705	0.480805	0.421127	0.455537	0.608128	0.552669	0.349823	0.26552	0.279841	0.32896	0.158766	0.423621	0.384757
ENSG00000166402	TUB	0.321142	0.395271	0.342568	0.374337	0	0.0285955	0.527039	0.331285	0.38004	0.338242	0.410413	0.342834	0.420078	0.367363	0.422009	0.412955	0.343487	0.326958	0.425482	0.589217	0.421612	0.514401
ENSG00000105983	LMBR1	0.320963	0.363434	0.433935	0.0724986	0.327936	0.221278	0.265934	0.399704	0.219335	0.255768	0.267461	0	0.360828	0.372123	0.35078	0.305118	0	0.216241	0.26949	0.460026	0.389088	0.333988
ENSG00000091972	CD200	0.320793	0.292103	0.259206	0.396708	0.124425	0	0.421489	0.209634	0.366127	0.155563	0.350129	0.315511	0	0.135382	0.373068	0.283576	0.326756	0.283319	0.33262	0.221534	0.379852	0.271941
ENSG00000100889	PCK2	0.320753	0.0374534	0.106817	0.335478	0.147246	0	0	0.124114	0	0.265459	0.182664	0	0	0.00224551	0.102995	0	0	0	0.268233	0.164871	0.130692	0.214582
ENSG00000179603	GRM8	0.320731	0.197903	0.0400972	0.611365	0.546646	0	0	0.482394	0.373393	0	0.359796	0	0	0.329658	0.279035	0.299968	0	0.384748	0	0.917982	0	0
ENSG00000183621	ZNF438	0.320661	0	0	0	0	0	0	0	0	0	0	0	0	0	0	0	0	0.075	0	0	0	0
ENSG00000076356	PLXNA2	0.32057	0.0136896	0.269687	0.32685	0.433724	0.0288057	0.126819	0.0185019	0	0	0	0	0	0.0274035	0	0.595214	0.557451	0.364736	0.407775	0.597113	0.238058	0.589024
ENSG00000178904	DPY19L3	0.320551	0	0	0	0	0	0	0	0	0	0	0	0.0367647	0	0	0.513399	0	0	0.653924	0	0.104885	0
ENSG00000085433	WDR47	0.319458	0.306096	0.29676	0.355566	0.250279	0	0.339977	0.389145	0.384886	0.350993	0.32034	0.208587	0.339299	0.327441	0.335654	0.44615	0.366148	0.394842	0.391861	0.362511	0.265656	0.299054
ENSG00000135423	GLS2	0.319445	0.361662	0.548648	0.589998	0.306902	0	0.261364	0.648776	0.239872	0.336552	0.407669	0.495407	0.206217	0.545278	0.534831	0	0	0	0	0.373605	0.386265	0.344869
ENSG00000103343	ZNF174	0.319286	0	0	0	0	0	0.536231	0.0770714	0	0	0.0912962	0	0.274579	0.332476	0	0.353467	0	0.0652056	0.523255	0.144531	0.093466	0
ENSG00000151746	BICD1	0.319265	0.285608	0.373054	0.538689	0.282349	0.25209	0.38461	0.37468	0.344576	0.279032	0.306289	0.118825	0.158289	0.37188	0.425457	0.299693	0.211913	0.258951	0.254808	0.379745	0.282402	0.316528
ENSG00000076864	RAP1GAP	0.319018	0.485222	0.546364	0.382385	0.407032	0.14687	0.284292	0.45545	0.275953	0.373419	0.400969	0.170822	0.351128	0.606943	0.406333	0	0.287602	0.30334	0.170117	0.534072	0.503725	0.277795
ENSG00000151490	PTPRO	0.318998	0.247039	0.0470409	0.0173651	0	0	0.370228	0.0778793	0	0	0.109868	0.392664	0.537502	0.0425194	0.308542	0.601071	0.262117	0	0.325521	0	0.189832	0
ENSG00000149256	TENM4	0.318955	0.144029	0.455698	0.199634	0	0	0.225221	0.328953	0.448966	0.38472	0.32412	0.207238	0.148663	0.322235	0.351529	0.550743	0.325227	0.464572	0.414914	0.463204	0.522573	0.54714
ENSG00000068305	MEF2A	0.318899	0	0	0	0	0.0697014	0	0	0	0.189197	0	0	0	0	0	0.319482	0.140722	0.207546	0.365054	0	0	0.152938
ENSG00000117020	AKT3	0.318775	0.100902	0.263592	0.390337	0.415539	0	0.331212	0.229336	0	0.0681168	0.220532	0.0113258	0	0.32338	0.365731	0.414316	0.267125	0.430674	0.592804	0.433685	0.139523	0.421109
ENSG00000109756	RAPGEF2	0.318429	0.307877	0.226722	0.000635014	0.347954	0	0	0.297116	0.40851	0.285398	0.286251	0.0668032	0.0963904	0.267293	0.425904	0.413828	0.191971	0.242262	0.676706	0.479924	0.213155	0.217722
ENSG00000197774	EME2	0.318328	0.188392	0.553188	0.18521	0.558813	0	0.196923	0.0161657	0	0	0.530299	0.233139	0.173555	0.234704	0.592859	0.510591	0.192988	0.232182	0.549538	0.569553	0.501045	0.564779
ENSG00000166246	C16orf71	0.318119	0.256702	0.00915597	0.128032	0	0	0.0164596	0.354054	0.110305	0.481583	0.388951	0.19195	0	0.572517	0.100501	0.243521	0	0	0.0190609	0.144457	0.278935	0.215835
ENSG00000170185	USP38	0.317972	0	0.0888827	0	0.219853	0	0	0.130303	0	0	0	0	0	0.153542	0	0.0776382	0	0	0.0106712	0.198464	0	0.119377
ENSG00000154265	ABCA5	0.317924	0.414434	0.368023	0.367707	0.413781	0.398708	0.336878	0.431276	0.0485805	0.0707706	0.290012	0.315927	0.106551	0.460813	0.374703	0.199689	0.0411589	0.121802	0.00872093	0.383687	0.357342	0.323778
ENSG00000072954	TMEM38A	0.317902	0.122398	0.294136	0.110317	0.281177	0.0961943	0	0.210314	0.09155	0.174553	0.0315201	0.0223957	0.149733	0.401899	0.377223	0.392822	0.341472	0.257787	0.411277	0.588611	0.331854	0.424096
ENSG00000143924	EML4	0.317467	0.0579451	0.130289	0.154856	0	0.407777	0	0.223709	0.226356	0	0	0.288296	0.0580214	0.268068	0.0154436	0.268847	0	0.128139	0.42748	0.260331	0.202754	0.262254
ENSG00000142920	AZIN2	0.317452	0.237815	0.383649	0	0.448712	0.308836	0	0.320455	0	0.31725	0.0122604	0	0.0879011	0.358201	0.0497814	0	0	0	0	0.216666	0.305952	0.230025
ENSG00000203772	SPRN	0.317444	0	0	0	0	0.103833	0	0	0.112987	0.273462	0	0	0	0	0	0.773365	0.578244	0.706456	0.714173	0.806021	0.177006	0.532709
ENSG00000104490	NCALD	0.317388	0.337231	0.315022	0	0.358936	0	0.360774	0.131983	0.415886	0.350682	0.132046	0	0.12627	0.287878	0.388971	0.50293	0.397835	0.4166	0.408903	0	0.254334	0
ENSG00000173744	AGFG1	0.317382	0.0669832	0.108946	0.17803	0.12234	0.218561	0.354479	0.0357464	0.007817	0.292852	0.00465051	0	0	0.047322	0	0.256526	0.0876638	0.369977	0.32443	0.22728	0.0817852	0.000663952
ENSG00000130638	ATXN10	0.31729	0.367983	0.360414	0.318333	0.0966026	0	0.340734	0.216525	0.207221	0.105199	0.31505	0.179102	0	0.282852	0.230915	0.150362	0.159922	0.0749483	0.28953	0.16646	0.351481	0.24202
ENSG00000129946	SHC2	0.317286	0.200028	0.320196	0	0.0893182	0	0.434345	0.330811	0.297668	0.425625	0.331914	0.118368	0	0.225722	0.33452	0.348293	0.411985	0.38203	0.331267	0.333051	0.151228	0.104268
ENSG00000140284	SLC27A2	0.316936	0.855614	0.821045	0.834785	0.24007	0	0	0.831936	0.877418	0.615514	0.605495	0.474535	0	0.821351	0.841849	0.147277	0.123084	0	0.304917	0	0.678642	0
ENSG00000065989	PDE4A	0.316893	0.494133	0.660572	0.482783	0.520719	0.366335	0	0.576513	0.216028	0.358567	0.172095	0.377093	0.573105	0.66437	0.532408	0.37155	0.43576	0.429545	0.323462	0.654594	0.577702	0.429935
ENSG00000106524	ANKMY2	0.316455	0.235953	0.369127	0.446714	0.304851	0	0.36344	0.49734	0.0506602	0.290008	0.362089	0	0.219359	0.36185	0.411898	0.254887	0.244108	0.307814	0.227047	0.261775	0.366251	0.0526805
ENSG00000058091	CDK14	0.316415	0.415206	0.401162	0.538728	0.504544	0.278006	0.437461	0.429456	0.424448	0.295861	0.45947	0.14346	0.252299	0.416659	0.397741	0.457423	0.17095	0.470218	0.609588	0.30148	0.316849	0.451566
ENSG00000110697	PITPNM1	0.316195	0.429392	0.453732	0.341641	0.367753	0.295147	0.38989	0.56735	0.397169	0.543801	0.393002	0.247037	0.216821	0.450248	0.385418	0.343853	0.245389	0.315397	0.419683	0.404888	0.427908	0.396992
ENSG00000131711	MAP1B	0.316106	0.353543	0.3583	0.314859	0.349038	0.228343	0.257208	0.328325	0.322665	0.359832	0.281839	0.230228	0.229011	0.351651	0.349858	0.38015	0.237296	0.271746	0.370224	0.328045	0.338717	0.33728
ENSG00000109339	MAPK10	0.316039	0.428043	0.447439	0.340835	0.375995	0.336277	0.226498	0.426579	0.386867	0.434939	0.388714	0.308514	0.363559	0.452145	0.426051	0.442802	0.359773	0.45258	0.541319	0.416871	0.424677	0.408115
ENSG00000078699	CBFA2T2	0.315795	0.24876	0.404055	0.309558	0.304802	0	0.293932	0.40225	0.259843	0.350209	0.24425	0.223672	0.404933	0.49425	0.557565	0.564056	0.0105197	0.0293634	0.34889	0.277424	0.531727	0.32691
ENSG00000172348	RCAN2	0.315606	0.411118	0.436574	0.376037	0.0301528	0.264988	0.431203	0.483098	0.226446	0.221393	0.34814	0.380976	0.288302	0.606493	0.480415	0	0	0	0	0.0208978	0.439724	0.595233
ENSG00000233670	PIRT	0.315494	0.463624	0	0	0	0	0	0	0	0	0	0	0	0	0	0	0	0	0	0	0	0
ENSG00000051341	POLQ	0.315383	0	0	0	0	0	0	0	0.402401	0.144018	0.35741	0	0	0	0.540898	0.0710592	0.423531	0.337282	0	0	0	0
ENSG00000116954	RRAGC	0.315217	0.230182	0.398962	0.359727	0.323451	0.00925147	0.412228	0.329806	0.0492998	0.303752	0.141549	0.0255311	0	0.3711	0.354038	0.122453	0	0.151891	0.108286	0.236655	0.333553	0.237913
ENSG00000164506	STXBP5	0.315129	0.200399	0.416601	0.386989	0.398304	0.0554037	0.205529	0.150547	0.328424	0.376156	0.293957	0.0438956	0.384326	0.411045	0.310025	0.523975	0.571579	0.45123	0.502295	0.369235	0.388495	0.196589
ENSG00000168280	KIF5C	0.315091	0.388204	0.408515	0.280134	0.380041	0.152019	0.302113	0.388871	0.320983	0.400182	0.21629	0.262618	0.264913	0.405942	0.368738	0.448882	0.3961	0.353815	0.454281	0.389536	0.415268	0.440543
ENSG00000197467	COL13A1	0.314983	0	0	0	0	0	0	0	0	0	0	0	0	0	0	0.0332618	0	0	0.13475	0	0	0
ENSG00000177181	RIMKLA	0.314493	0.494077	0.848992	0.153319	0.405825	0.18184	0.399977	0.616384	0	0.268499	0.0158775	0	0.292799	0.869872	0.529832	0	0	0.0176407	0.181844	0	0.567894	0.40571
ENSG00000109794	FAM149A	0.314104	0.381253	0.255251	0.39223	0.197458	0	0.599362	0.119638	0.320099	0	0.367546	0	0	0.276364	0.372156	0	0	0.128311	0	0	0.151851	0.404699
ENSG00000139505	MTMR6	0.314099	0.0335421	0.198729	0.258433	0.00743494	0.0618167	0.389949	0.0318394	0.0610973	0.135447	0.0976017	0	0	0.106225	0.0133662	0.273006	0.0565647	0.289684	0.291842	0.187444	0.240968	0.249543
ENSG00000151532	VTI1A	0.31385	0.218222	0.318075	0.0143841	0.203285	0	0.076001	0.209573	0.323212	0.192939	0.210222	0	0.219453	0.282975	0.262407	0.218825	0.116498	0.196419	0.291235	0.194465	0.188645	0.243685
ENSG00000241973	PI4KA	0.313572	0.367298	0.532072	0.3331	0.402643	0.0601346	0.256953	0.385866	0.136767	0.230667	0.197799	0.13751	0.157219	0.416406	0.386862	0.39636	0.269028	0.280606	0.390369	0.564496	0.41663	0.297508
ENSG00000003249	DBNDD1	0.313547	0.444376	0.442293	0.353098	0.441858	0	0.0702039	0.459845	0.464368	0.460976	0.451536	0.440821	0.312621	0.371935	0.437387	0	0	0	0.0847053	0	0.410268	0.423751
ENSG00000135018	UBQLN1	0.31352	0.339391	0.42512	0.398497	0.309698	0.289269	0.34787	0.361567	0.271389	0.31101	0.279931	0.170847	0.146791	0.378168	0.374661	0.162597	0.0411014	0.185385	0.259808	0.238452	0.346377	0.273227
ENSG00000138834	MAPK8IP3	0.313382	0.288366	0.388059	0.380709	0.41111	0.19566	0.342953	0.424664	0.242549	0.217806	0.348747	0.220912	0.305355	0.424906	0.383856	0.383689	0.247033	0.358459	0.41534	0.382129	0.350481	0.374979
ENSG00000007047	MARK4	0.313371	0.286792	0.381657	0.112446	0.374107	0.34492	0.362057	0.265792	0.073614	0.219505	0.01677	0	0	0.544594	0.383684	0.31274	0.0423086	0.280972	0.471448	0.380808	0.395836	0.468855
ENSG00000111726	CMAS	0.313025	0.439348	0.419576	0.365058	0.37114	0	0.360406	0.414159	0.459902	0.434595	0.454615	0.402089	0.297187	0.38267	0.447691	0.390924	0.384829	0.381137	0.41264	0.319033	0.402826	0.198084
ENSG00000023228	NDUFS1	0.312964	0.352726	0.438492	0.154823	0.387343	0	0.133962	0.369849	0.155241	0.281503	0.161593	0.125331	0.213735	0.43904	0.31115	0.114385	0	0	0.201661	0.300439	0.359391	0.182268
ENSG00000138688	KIAA1109	0.31293	0.178408	0.269154	0.364306	0.0873749	0.0197645	0.370332	0.283667	0.0885287	0.237726	0.145565	0.0437036	0.0330214	0.314471	0.17831	0.349774	0	0.267139	0.253537	0.351833	0.270219	0.277501
ENSG00000128268	MGAT3	0.312867	0.33944	0.584919	0.0858158	0.283691	0	0.217288	0.406584	0.0800403	0.304341	0.175091	0.0807525	0.233623	0.470747	0.290748	0.380779	0.25232	0.347685	0.476012	0.509796	0.396084	0.375293
ENSG00000124507	PACSIN1	0.31266	0.421501	0.417311	0.359605	0.466446	0.167998	0.315399	0.416534	0.385508	0.413951	0.386523	0.362111	0.185094	0.4494	0.412297	0.439141	0.385667	0.37606	0.43192	0.402188	0.413429	0.402003
ENSG00000166783	MARF1	0.31229	0.353311	0.370986	0.699821	0.404141	0.12919	0.585099	0.30975	0	0	0.157915	0.0708984	0.271643	0.385702	0.40502	0.139231	0	0.0195248	0.168932	0.303068	0.344152	0.319134
ENSG00000162929	KIAA1841	0.312094	0.253008	0.392176	0.548865	0.36031	0	0.403864	0.345363	0.251703	0.411472	0.316251	0.216581	0	0.381435	0.0867855	0.300705	0.0403541	0.265508	0.331533	0.286765	0.343789	0
ENSG00000160469	BRSK1	0.312062	0.286659	0.322299	0.241756	0.580449	0.203874	0.0101942	0.317794	0	0.337204	0.250182	0.120349	0.0889037	0.527349	0.450574	0.405583	0.390223	0.390951	0.563659	0.484724	0.373414	0.327547
ENSG00000165355	FBXO33	0.311845	0.397646	0.526599	0.554632	0	0.314037	0.384138	0.410994	0.355639	0.310734	0.451057	0.38865	0.374061	0.609302	0.520352	0.305261	0	0.342274	0.114026	0.456445	0.455923	0.359123
ENSG00000108094	CUL2	0.31173	0.356573	0.567412	0.20954	0.152147	0	0.0840785	0.352187	0.253008	0.204307	0.388866	0.0913612	0.276703	0.375287	0.333276	0.250127	0.184328	0.178148	0.308262	0.476221	0.418495	0.227694
ENSG00000112146	FBXO9	0.311715	0.402356	0.278896	0.292228	0.372306	0.172939	0.125256	0.433667	0.434682	0.449306	0.400476	0.3913	0.276788	0.397147	0.407333	0.33078	0.197681	0.184573	0.29428	0.163202	0.327091	0.391692
ENSG00000063046	EIF4B	0.311591	0.260412	0.276327	0.183169	0.255262	0	0.362278	0.325333	0.312751	0.261742	0.366033	0.183374	0.171257	0.301321	0.330568	0.267388	0.000747298	0.222164	0.352843	0.126623	0.310883	0.264721
ENSG00000142875	PRKACB	0.311528	0.468114	0.404616	0.496408	0.287285	0	0.31972	0.401729	0.416053	0.367533	0.468547	0.326729	0.355603	0.387989	0.455845	0.328234	0	0.322949	0.142105	0.373201	0.411092	0
ENSG00000028203	VEZT	0.311416	0.19437	0.219439	0.302529	0.0943039	0.0600294	0.386078	0.318269	0.171651	0.151649	0.316936	0.0256591	0.196119	0.307948	0.251465	0.39746	0.143548	0.352592	0.325642	0.351111	0.240883	0.429607
ENSG00000063015	SEZ6	0.311288	0	0.315013	0.157714	0	0	0.537127	0.401911	0.400972	0.445906	0.406664	0.347005	0	0.165145	0.0275708	0.521386	0.605714	0.556401	0.336634	0.734017	0.0898355	0.806687
ENSG00000149218	ENDOD1	0.311189	0.305285	0.529803	0.294401	0.329712	0.274113	0.315937	0.585501	0.0641185	0.0693261	0.331764	0.220776	0.100802	0.584551	0.364789	0	0	0	0	0	0.229525	0.505052
ENSG00000163625	WDFY3	0.311147	0.266617	0.325546	0.575792	0.290952	0.208035	0.396718	0.337472	0.216239	0.131822	0.157435	0.0982851	0.130281	0.390779	0.312785	0.311717	0.125976	0.300841	0.292039	0.347267	0.309033	0.409898
ENSG00000147416	ATP6V1B2	0.311081	0.412144	0.410834	0.358703	0.394647	0.21352	0.313238	0.405432	0.392123	0.373537	0.395108	0.293171	0.304973	0.421045	0.423618	0.412333	0.349719	0.364883	0.42342	0.369607	0.39996	0.401721
ENSG00000183576	SETD3	0.310915	0.186679	0.316682	0.0835287	0.292491	0.0376367	0.237732	0.268343	0.248378	0.326814	0.289008	0.164128	0.085361	0.288396	0.292285	0.141458	0.0709933	0.0599174	0.322398	0.191595	0.302789	0.305645
ENSG00000103423	DNAJA3	0.31076	0.346325	0.579971	0.175622	0.366903	0.0977392	0.164074	0.35316	0.145508	0.0589175	0.296167	0.119401	0.139773	0.401986	0.335112	0.2187	0	0.176021	0.299632	0.274507	0.333515	0.19539
ENSG00000081377	CDC14B	0.310701	0.250252	0.0182431	0.602956	0.248254	0.100899	0.235838	0.128618	0.323217	0.0987333	0.258171	0.0276746	0.274763	0.248219	0.402698	0	0	0	0	0	0.246775	0.368159
ENSG00000110514	MADD	0.310681	0.394592	0.427688	0.374375	0.389804	0	0.370556	0.41417	0.362385	0.366046	0.330269	0.221399	0.14746	0.415493	0.416597	0.487872	0.376457	0.341103	0.571339	0.442791	0.410356	0.409481
ENSG00000150625	GPM6A	0.310624	0.376321	0.31938	0.360521	0.13987	0.162637	0.123185	0.300011	0.391013	0.348342	0.346639	0.290864	0.262066	0.258959	0.342255	0.523383	0.351141	0.344345	0.405259	0.377222	0.330696	0.322986
ENSG00000155096	AZIN1	0.310376	0.0764296	0.210753	0.175794	0.0997318	0.316165	0.0759336	0.0934525	0.0134759	0.269069	0	0	0	0.172886	0.0163003	0.212719	0	0.28368	0.305824	0.0823785	0.228887	0.357996
ENSG00000112539	C6orf118	0.310174	0.288919	0	0	0	0	0	0.0183904	0.83541	0.755668	0.0919044	0.0634243	0	0	0	0.185796	0	0	0	0	0	0
ENSG00000135049	AGTPBP1	0.310103	0.159738	0.313721	0.359189	0.290077	0.231414	0.348439	0.280538	0.134424	0.336551	0.162483	0.0607243	0.183289	0.30549	0.278809	0.406362	0.207535	0.354462	0.469739	0.480502	0.241891	0.412487
ENSG00000147481	SNTG1	0.309976	0.475245	0.468616	0.521132	0.193531	0	0	0.444452	0.33046	0.610176	0.343917	0.383899	0.732124	0.507136	0.40299	0.27864	0.120999	0.0597944	0.318323	0.256991	0.389878	0.527187
ENSG00000117569	PTBP2	0.309446	0.220057	0.150771	0.537627	0	0	0.437536	0.296543	0.21178	0	0.258457	0	0	0.0723518	0.0512761	0.357822	0.275075	0.34113	0.342158	0.164546	0.287962	0.230768
ENSG00000138028	CGREF1	0.309402	0.440542	0.403993	0.299097	0.34875	0	0.272881	0.389625	0.426895	0.240169	0.409051	0.407434	0.0418449	0.398451	0.420856	0.462031	0.313263	0.259339	0.256414	0.201351	0.463366	0.421618
ENSG00000126950	TMEM35A	0.309377	0.341972	0.531954	0.55732	0.310309	0.337007	0	0.443278	0.336821	0.418726	0.318471	0	0.10234	0.547612	0.392565	0.642322	0.283707	0.418937	0.301065	0.530086	0.416596	0.0345129
ENSG00000115993	TRAK2	0.309326	0.205829	0.271121	0.0447811	0.436975	0.257926	0.149324	0.0613682	0	0.281003	0	0	0.22981	0.255001	0	0.350769	0.0431134	0.411959	0.483434	0.488842	0.274571	0.179362
ENSG00000090857	PDPR	0.30925	0	0.442653	0.0104167	0.182268	0	0	0.272303	0	0	0	0	0.0237737	0.35082	0.413204	0	0	0	0	0.0616023	0.311238	0.091503
ENSG00000185274	GALNT17	0.309212	0.0733482	0.323117	0.336205	0.16959	0.531953	0.289709	0.33671	0	0.411881	0.147809	0.139168	0.0105615	0.220981	0.223657	0.393441	0	0.401882	0.736362	0.495973	0.242813	0.377356
ENSG00000166816	LDHD	0.309043	0.286818	0.271569	0.383625	0.234603	0	0.17738	0.52005	0.276044	0.577606	0.250119	0	0	0.357594	0.182976	0	0	0.240754	0.0978182	0.102628	0.246505	0.36865
ENSG00000135974	C2orf49	0.308991	0.185169	0.190329	0.0882858	0.0130539	0.17241	0.35933	0.134079	0.342743	0.0700989	0.272245	0.153724	0	0.30263	0.262655	0	0.0122651	0	0.150656	0	0.35125	0.376639
ENSG00000204304	PBX2	0.308754	0.226291	0.366295	0.205036	0.235071	0.263103	0.223999	0.33286	0.319942	0.20128	0.28078	0.166209	0.22362	0.399154	0.503777	0.285168	0.0568435	0.24209	0.321386	0.269301	0.316803	0.213742
ENSG00000151835	SACS	0.308499	0.369489	0.553797	0.591158	0.367598	0.508175	0.231086	0.574785	0.286928	0.469609	0.252162	0.257408	0.749118	0.431016	0.0796045	0.39761	0.181836	0.298414	0.400895	0.493852	0.402003	0.174317
ENSG00000204131	NHSL2	0.308388	0.0137907	0.139636	0.263267	0.169236	0	0.56179	0.0418585	0.174083	0	0.210372	0	0.199835	0.156603	0.167519	0.288651	0.0354851	0.290712	0.199817	0.139722	0.237152	0
ENSG00000196338	NLGN3	0.308345	0.302096	0.299026	0.318822	0.110885	0	0.174571	0.307515	0.342595	0.203799	0.34981	0.168488	0.180166	0.380639	0.374156	0.442304	0.0850195	0.34224	0.390805	0.476086	0.38229	0.345576
ENSG00000132970	WASF3	0.30797	0.296189	0.410027	0.381507	0.20743	0.410466	0.390188	0.376348	0.336184	0.294157	0.321674	0.27425	0	0.423058	0.355452	0.0180194	0.121895	0.327501	0.242906	0.138468	0.435344	0.427822
ENSG00000142549	IGLON5	0.307884	0.463705	0.721306	0.697473	0.562089	0.382562	0.234954	0.725712	0.198262	0.0819181	0.492978	0.138726	0.223334	0.872985	0.661824	0	0	0	0.147216	0.236054	0.595135	0.388731
ENSG00000204767	FAM196B	0.307567	0.777532	0.728445	0.779119	0	0	0	0.680524	0.495665	0.66678	0.68143	0.276582	0.203863	0.653888	0.736161	0	0.0140772	0	0	0	0.542272	0.909103
ENSG00000122126	OCRL	0.307519	0.258332	0.264209	0.465392	0.257745	0	0.376204	0.315396	0.397308	0.26579	0.348952	0.36435	0.121992	0.27399	0.366413	0.347771	0.048287	0.367422	0.354709	0.138853	0.359428	0.431585
ENSG00000178567	EPM2AIP1	0.307463	0.43846	0.475871	0.656625	0.406901	0.305076	0.54678	0.429373	0.400893	0.422099	0.448494	0.390071	0.156952	0.459417	0.480814	0.134053	0.0900207	0.240213	0.283185	0.200975	0.456536	0.433259
ENSG00000071575	TRIB2	0.307402	0.186046	0.153501	0	0	0	0	0.283805	0	0	0	0	0	0.314614	0	0	0	0	0	0	0.351714	0
ENSG00000004478	FKBP4	0.307375	0.100626	0.211041	0.0529015	0.277221	0	0.140502	0.0647566	0.0840687	0.0986638	0.0793405	0.0192603	0	0.172469	0.199793	0	0	0	0	0	0.174825	0.105854
ENSG00000113719	ERGIC1	0.307332	0.322984	0.349933	0.386435	0.318063	0	0.316139	0.355519	0.112275	0.0738284	0.340733	0.100909	0.177389	0.365362	0.345554	0.409149	0.0613359	0.382104	0.367303	0.403793	0.35642	0.384973
ENSG00000135973	GPR45	0.307269	0.0611784	0.060357	0.301068	0	0	0.502761	0	0.0188471	0	0.286432	0.290676	0.365081	0.0187957	0.306115	0.384841	0	0.565517	0.460877	0.485939	0.166118	0
ENSG00000141576	RNF157	0.306962	0.491509	0.645299	0.511169	0.336504	0.240194	0.419134	0.626222	0.321784	0.26374	0.443726	0.317631	0.527515	0.636205	0.500214	0.433947	0.411872	0.455286	0.549351	0.520828	0.517483	0.404402
ENSG00000139977	NAA30	0.306958	0.128518	0.187042	0.51902	0	0	0.593703	0.0646882	0	0.0293078	0.280414	0	0	0.205794	0.0519819	0.177468	0	0.287178	0.188047	0.162871	0.167405	0.0689296
ENSG00000165716	FAM69B	0.306858	0.392643	0.405032	0.0345838	0.40053	0	0	0.406373	0.345966	0.390001	0.358471	0.228092	0.203923	0.401411	0.374651	0.367349	0.341096	0.191908	0.337431	0.449372	0.432467	0.394062
ENSG00000156194	PPEF2	0.306785	0	0	0	0.214862	0	0.117443	0	0.702517	0.044898	0.353709	0	0.346312	0.281243	0	0	0	0	0	0	0.318653	0.033355
ENSG00000188559	RALGAPA2	0.306777	0.183492	0.34313	0.326394	0.299918	0.571651	0.332379	0.289367	0.160221	0.268692	0.105849	0.0243793	0.080975	0.300096	0.00906246	0.2462	0	0.131307	0	0.588881	0.40749	0.453263
ENSG00000114745	GORASP1	0.30673	0.214339	0.16026	0	0	0	0.184918	0.0897657	0.175804	0.133119	0.102779	0.445897	0.079757	0.206344	0.195278	0.231172	0	0.207618	0.0274507	0.266114	0.0520079	0.262251
ENSG00000118503	TNFAIP3	0.306632	0	0	0	0	0	0	0	0	0	0	0	0	0	0	0	0.083579	0.202083	0	0.0806034	0	0
ENSG00000149679	CABLES2	0.306519	0.584359	0.854396	0.395759	0.617087	0.399497	0.165761	0.575057	0.154685	0.408205	0.329869	0.241039	0.0724701	0.837803	0.601909	0.198509	0.178204	0.344798	0.391545	0.383306	0.510833	0.406388
ENSG00000172795	DCP2	0.30618	0.425693	0.502479	0.197796	0.359016	0.315499	0.332464	0.38629	0.25041	0.28059	0.324658	0.0478628	0.31738	0.547157	0.310196	0.306873	0	0.169965	0.364152	0.376401	0.418773	0.373628
ENSG00000054793	ATP9A	0.306126	0.273129	0.317943	0.338549	0.324996	0.00988225	0.277537	0.3751	0.282876	0.297371	0.363722	0.222405	0.179947	0.371975	0.367687	0.377976	0.248394	0.347919	0.381275	0.46632	0.309546	0.280736
ENSG00000100320	RBFOX2	0.305874	0.346834	0.343092	0.359693	0.393807	0.291948	0.366957	0.343171	0.408868	0.395562	0.38243	0.162721	0.268681	0.398822	0.389194	0.420778	0.356452	0.412419	0.439113	0.416439	0.407101	0.421937
ENSG00000204842	ATXN2	0.305701	0.114063	0.324864	0.205676	0.00325279	0	0.168443	0.245978	0.0887205	0.0504938	0.0776494	0	0.0210561	0.324164	0.305195	0.196501	0	0.0949528	0.179522	0.255232	0.17812	0.203735
ENSG00000144668	ITGA9	0.305622	0	0.111608	0	0	0	0	0	0	0	0	0	0	0	0	0	0	0.43018	0	0.0379429	0	0
ENSG00000173621	LRFN4	0.30556	0.101804	0	0.225586	0.150363	0	0.135175	0	0	0.252093	0.101957	0	0	0.232527	0.232361	0.423499	0.140653	0	0.193456	0.488866	0.23909	0.0264973
ENSG00000205755	CRLF2	0.305483	0.271258	0.0959494	0	0	0	0	0.223216	0.430269	0.266367	0.354881	0	0	0.265256	0.092371	0.227615	0	0.038934	0	0.354704	0.0657703	0.270454
ENSG00000115966	ATF2	0.305429	0.298482	0.280119	0.608278	0.104397	0.216075	0.500859	0.200656	0.284184	0.257592	0.298321	0.161002	0.132219	0.241427	0.345103	0.309433	0.0526558	0.38735	0.346883	0.220347	0.310814	0.304798
ENSG00000138380	CARF	0.305181	0.254813	0.0582696	0.195739	0.0189788	0	0.184478	0.136633	0.26486	0	0.239368	0	0	0.172192	0.257293	0.412543	0	0.124149	0.325668	0.315371	0.253498	0
ENSG00000070031	SCT	0.305177	0	0	0.260776	0.314813	0	0	0	0.232138	0	0.309237	0.110258	0	0	0.101831	0	0	0	0.0590595	0	0.23295	0
ENSG00000164796	CSMD3	0.304685	0.353965	0	0.469627	0	0	0.140032	0.290078	0.655194	0.414089	0.529007	0.509016	0.32137	0.29466	0.221042	0.510245	0.304887	0.30139	0.236039	0.0958297	0.225817	0.0170427
ENSG00000155816	FMN2	0.304628	0	0	0.522001	0.17551	0	0.378349	0	0	0.0124419	0.102216	0	0	0.208925	0	0.244583	0	0.263737	0.16747	0.140657	0	0.297839
ENSG00000088179	PTPN4	0.3046	0.292411	0.36773	0.263031	0.279727	0	0.239704	0.262765	0.0148667	0.339296	0.0144682	0	0.249786	0.245973	0.237105	0.243703	0.00879513	0.207713	0	0.163864	0.199431	0.325663
ENSG00000166479	TMX3	0.304471	0.0818347	0.269786	0.311243	0	0	0.36371	0.0537992	0	0	0	0	0	0.244347	0.161007	0	0	0.00129132	0	0.12065	0.0640039	0.238626
ENSG00000072071	ADGRL1	0.304444	0.318846	0.365799	0.35449	0.32315	0.162847	0.252672	0.36541	0.255473	0.364944	0.328749	0.163553	0.273512	0.391703	0.354593	0.50551	0.371911	0.363563	0.425767	0.57228	0.350195	0.309793
ENSG00000139921	TMX1	0.304057	0.147926	0.214627	0.377136	0	0.163005	0.427759	0.129546	0.237456	0	0.354283	0.281554	0	0.180499	0.32003	0	0	0	0	0.0880049	0.317339	0.406135
ENSG00000185950	IRS2	0.303982	0	0.485629	0.445803	0.219447	0.536792	0.508051	0.190197	0.00172645	0.219149	0	0	0	0.193598	0.209404	0	0.23292	0	0.282232	0.136095	0.247984	0
ENSG00000167702	KIFC2	0.303972	0.3325	0.522357	0.108353	0.481929	0.315717	0	0.465494	0.40854	0.580928	0.371891	0.339662	0.502591	0.54483	0.403283	0.598617	0.43348	0.342928	0.579963	0.613936	0.411564	0.298692
ENSG00000103494	RPGRIP1L	0.30353	0.287025	0.542609	0.539085	0.211349	0	0.199787	0.511695	0.0582968	0.270614	0.214909	0	0.399291	0.412448	0.315827	0.162651	0.21727	0.213757	0.292665	0.487206	0.391848	0.341662
ENSG00000067221	STOML1	0.30352	0.217672	0.155313	0.0647665	0.332722	0	0	0.359021	0.194386	0.302954	0.334543	0.0604684	0.0625	0.262479	0.253505	0.36037	0	0.018595	0.446106	0.351189	0.202427	0.297904
ENSG00000136813	KIAA0368	0.303483	0.0624369	0.336367	0.314755	0.223815	0.153865	0.342226	0.22212	0.0340495	0.219127	0.24028	0.106156	0	0.328348	0.318474	0.275363	0	0.218853	0.199435	0.284492	0.307479	0.19564
ENSG00000005486	RHBDD2	0.303219	0.357238	0.386535	0.399835	0.244437	0.0659444	0.455654	0.343709	0.441243	0.426474	0.527203	0.426263	0.0389037	0.346507	0.438992	0.353048	0.306856	0.379784	0.333501	0.36823	0.334566	0.379425
ENSG00000176454	LPCAT4	0.303208	0.162472	0.406189	0	0.531998	0	0	0.507597	0.185163	0.32657	0.25528	0.269667	0.795185	0.641121	0.210937	0.518238	0.179668	0.176269	0.123705	0.504346	0.207039	0
ENSG00000182287	AP1S2	0.303157	0.290763	0.39605	0.601991	0.443099	0.292458	0.358683	0.368176	0.436783	0.0315163	0.135566	0.0232915	0	0.377346	0.324172	0	0.212201	0	0	0	0.421122	0.535608
ENSG00000170471	RALGAPB	0.303128	0.194658	0.371579	0.196315	0.286651	0	0.169254	0.334066	0.122265	0.350461	0.279881	0.213968	0.278108	0.420715	0.243986	0.335782	0.0953212	0.0912879	0.374974	0.430786	0.364408	0.422765
ENSG00000166532	RIMKLB	0.30309	0.226792	0.341431	0.552425	0.103808	0.416008	0.58329	0.167793	0.248169	0	0.374197	0.284507	0	0.144356	0.337852	0	0	0.285225	0.313041	0.322333	0.489282	0.33278
ENSG00000136485	DCAF7	0.302982	0.22907	0.279883	0.512527	0.295826	0.162919	0.429274	0.240712	0.439603	0.2504	0.385109	0.425895	0.212698	0.217167	0.384495	0.380277	0.340353	0.377391	0.336483	0.379881	0.299591	0.38006
ENSG00000171603	CLSTN1	0.302951	0.342459	0.387033	0.313995	0.344607	0.204584	0.134751	0.382538	0.345587	0.36859	0.362578	0.271231	0.356171	0.399801	0.371754	0.414731	0.277222	0.338376	0.38512	0.521998	0.350974	0.34952
ENSG00000135845	PIGC	0.302777	0	0	0	0	0	0	0	0	0	0	0	0	0.0164671	0	0	0	0	0	0	0	0
ENSG00000179832	MROH1	0.302519	0.43471	0.594065	0.567533	0.544514	0.506174	0.463517	0.398623	0	0.186791	0.0817938	0	0.0114973	0.647358	0.386262	0	0	0.0279762	0.211349	0.268722	0.33623	0.406189
ENSG00000107521	HPS1	0.302483	0	0	0	0	0.107303	0	0	0.030082	0	0	0	0	0	0	0	0	0.06921	0.0755078	0.0508698	0	0
ENSG00000020129	NCDN	0.302121	0.396107	0.409443	0.3437	0.371954	0.171047	0.156068	0.42383	0.504194	0.611579	0.394002	0.342706	0.398482	0.421658	0.396053	0.491325	0.304501	0.333397	0.484947	0.372685	0.384553	0.261454
ENSG00000158828	PINK1	0.30212	0.360208	0.327481	0.191684	0.326384	0	0	0.293286	0.245516	0.279776	0.367777	0.233006	0.231016	0.382274	0.355864	0.0845526	0.0722005	0	0	0.209444	0.269331	0.299698
ENSG00000198961	PJA2	0.302106	0.415031	0.400382	0.425305	0.315523	0.219092	0.341952	0.389921	0.386623	0.386112	0.389535	0.250806	0.297164	0.384795	0.395071	0.384791	0.207519	0.33549	0.401356	0.35156	0.40337	0.353479
ENSG00000141622	RNF165	0.301471	0.134797	0.143438	0.258963	0.13347	0.158603	0.143759	0.212632	0.276813	0.170117	0.116646	0	0.300847	0.176115	0.101013	0.638265	0.507877	0.521049	0.723114	0.591117	0.280107	0.50641
ENSG00000114648	KLHL18	0.301349	0.367316	0.463619	0.298554	0.329549	0.361762	0.233672	0.549832	0.00695377	0.259295	0.288474	0	0.163738	0.514934	0.594934	0.243094	0	0.147867	0.34369	0.346683	0.397092	0.305092
ENSG00000029725	RABEP1	0.301278	0.155529	0.308696	0.295296	0.173963	0.0312237	0.353453	0.262948	0.164563	0.286868	0.194973	0.212368	0.10488	0.335783	0.30764	0.330801	0.332194	0.357595	0.374557	0.305119	0.368825	0.353167
ENSG00000225697	SLC26A6	0.30107	0.097753	0	0	0	0	0	0.0492881	0	0	0	0	0	0.048274	0	0.0620887	0.516364	0	0	0	0	0
ENSG00000107938	EDRF1	0.301033	0.087415	0.17868	0.0263824	0.0234104	0.0197753	0.0608772	0.523364	0	0.0221655	0	0	0.518696	0.265595	0.1709	0.106745	0	0	0.53551	0.47548	0.161649	0.23476
ENSG00000103502	CDIPT	0.30085	0.0361184	0.164792	0.0942751	0.304962	0	0.258446	0.055326	0	0.0908695	0	0	0	0.122398	0.115502	0.341586	0.142504	0.269183	0.184995	0.363653	0.0275566	0.110631
ENSG00000242114	MTFP1	0.300644	0.367936	0.414654	0.0125049	0.429775	0.087889	0	0.333254	0.096318	0	0.254957	0.0822242	0.122259	0.386639	0.411937	0.543063	0.520762	0.369264	0.474285	0.313411	0.391083	0.42545
ENSG00000143674	MAP3K21	0.300625	0.230626	0	0	0	0	0.0510478	0.332653	0	0	0	0	0	0.190142	0.232589	0.134045	0	0.689911	0	0.718562	0	0.0303116
ENSG00000196652	ZKSCAN5	0.300608	0.339812	0.414563	0.00540304	0.0822254	0	0.0913854	0	0	0	0	0	0	0.129272	0	0	0	0	0.0324183	0	0.179465	0.0137559
ENSG00000097046	CDC7	0.300394	0.292845	0.308782	0.323351	0.134189	0.0696629	0.11378	0.634899	0.2876	0.116258	0	0.276506	0	0.323389	0.306317	0.219282	0	0	0.236262	0.0714511	0.0532572	0.182963
ENSG00000111110	PPM1H	0.300084	0	0.145717	0.28497	0	0	0.336181	0	0	0	0	0	0	0.238384	0.0516164	0.272987	0.31635	0.0713179	0.330265	0.109279	0.0394952	0.636658
ENSG00000171310	CHST11	0.299523	0	0.123527	0	0	0	0.196684	0	0	0	0	0	0	0.0256139	0	0	0	0.185146	0.671759	0	0.243045	0
ENSG00000156475	PPP2R2B	0.299389	0.101132	0.200488	0.252571	0.256466	0	0.252304	0.27272	0.399215	0.404006	0.314026	0.130407	0.239854	0.23933	0.159644	0.483885	0.377852	0.441932	0.41637	0.399401	0.263753	0
ENSG00000108091	CCDC6	0.299215	0.0570619	0.360144	0.531207	0.511071	0.280782	0.556359	0.319182	0	0	0.414133	0.0785893	0	0.333642	0.325558	0.315097	0	0.143214	0.347553	0.34919	0.386945	0.0511089
ENSG00000153714	LURAP1L	0.299204	0.348108	0.148689	0	0.0429022	0	0	0.0516002	0.100238	0.368486	0.0948937	0.274058	0	0.0939514	0.0213767	0	0.219548	0	0.48312	0	0	0.3193
ENSG00000160193	WDR4	0.299192	0.101119	0	0	0.129777	0.0933708	0.259298	0.0762998	0.188962	0.185922	0	0	0.327817	0.163822	0	0.0341706	0	0.23903	0.0698611	0.0720269	0.229938	0.275328
ENSG00000188582	PAQR9	0.299189	0.223068	0.312636	0.302665	0.228332	0.21164	0.24129	0.483778	0.199711	0.399923	0.366172	0.103916	0.712234	0.353113	0.307628	0.606619	0.40415	0.507707	0.649794	0.624011	0.212851	0.299682
ENSG00000152061	RABGAP1L	0.299045	0.135412	0.0789793	0.509776	0	0	0.464489	0.23461	0.326167	0.136501	0.337406	0.236374	0	0.26937	0.189868	0.474933	0.19126	0.445327	0.543354	0.371054	0.185043	0.384814
ENSG00000116138	DNAJC16	0.299029	0.106104	0.257532	0.175685	0	0.0106091	0.256573	0.274195	0.155605	0.0833544	0.0344795	0	0.0659759	0.32779	0.30515	0.360119	0.177095	0.333648	0.368123	0.420933	0.188056	0.161196
ENSG00000149582	TMEM25	0.298924	0.0495382	0.39954	0.289377	0.476527	0.368808	0.0389002	0.628467	0.188401	0.36844	0.366321	0.0142053	0.492766	0.585829	0.321	0.251714	0	0.350034	0.329655	0.435876	0.248689	0.355454
ENSG00000131127	ZNF141	0.298736	0.610991	0.633769	0.405924	0.0932348	0.0551685	0.396699	0.477487	0.647728	0.520276	0.434381	0.414452	0.50427	0.530635	0.62537	0.381206	0	0.137734	0	0	0.429521	0.372109
ENSG00000198420	TCAF1	0.298415	0.382873	0.40746	0.303193	0.2832	0.151703	0.360027	0.299032	0.298508	0.272902	0.289888	0.281071	0.0480615	0.345564	0.35496	0.374855	0.198878	0.335776	0.397636	0.386219	0.407874	0.39852
ENSG00000054965	FAM168A	0.298274	0.17155	0.192384	0.213967	0.258744	0	0.128008	0.210561	0.0129484	0.244658	0.0931041	0	0.153743	0.299951	0.251358	0.147421	0.143596	0.178955	0.153622	0.266845	0.214646	0.135008
ENSG00000168959	GRM5	0.298227	0.286389	0.302876	0.372129	0	0.267053	0	0.355047	0.629567	0.601587	0.391536	0.283851	0.634611	0.316751	0.309446	0.557406	0.453243	0.44498	0.586022	0.623563	0.355792	0
ENSG00000142197	DOPEY2	0.298177	0.111907	0.313127	0.067514	0.282545	0.227052	0.252445	0.440591	0.0331863	0.163102	0.157872	0	0.0483289	0.310659	0.230121	0.216228	0.0530004	0.00833333	0.24381	0.351237	0.161266	0
ENSG00000085377	PREP	0.297997	0.136436	0.186803	0	0.138825	0	0	0.188908	0	0	0	0	0	0.347761	0	0	0	0.213021	0.288608	0	0.263323	0
ENSG00000174640	SLCO2A1	0.297811	0	0	0	0.946531	0	0	0	0	0	0	0	0	0	0	0	0	0	0.960205	0.468604	0	0
ENSG00000151025	GPR158	0.297697	0.316295	0.400321	0.399506	0.386601	0.538951	0.275135	0.41155	0.264591	0.440017	0.239265	0.169842	0.0835561	0.402282	0.316195	0.527868	0.170468	0.397181	0.420421	0.330714	0.42744	0.778947
ENSG00000232434	C9orf172	0.297626	0.227658	0.279517	0	0	0.157249	0.0102467	0.220916	0.193972	0.324925	0.079606	0	0.266008	0.309996	0.0231922	0.601118	0.370189	0.309625	0.47515	0.400706	0.288427	0.1896
ENSG00000160753	RUSC1	0.297408	0.421531	0.434809	0.4244	0.456254	0.206504	0.412266	0.416753	0.200727	0.432885	0.255534	0.374804	0.0816845	0.45695	0.425778	0.393413	0.417497	0.432832	0.372505	0.430515	0.408985	0.442677
ENSG00000185272	RBM11	0.297344	0	0	0.22393	0	0	0.363852	0	0.218735	0	0.227015	0	0	0	0.140497	0.0614897	0	0	0.343712	0.106405	0.00300778	0
ENSG00000106266	SNX8	0.297317	0.270905	0.284978	0	0.346406	0	0.315595	0.256714	0.0872899	0.292303	0.250306	0	0	0.196009	0.294603	0	0	0	0	0	0.152533	0.448238
ENSG00000144792	ZNF660	0.297284	0.185048	0.228445	0.638284	0	0	0.611416	0.272997	0.126199	0	0.276206	0.195571	0.108987	0.22838	0.124262	0	0	0.0361472	0.038872	0.0176349	0.0023443	0.0659456
ENSG00000074964	ARHGEF10L	0.297239	0.263886	0.320567	0	0.600556	0	0.0540616	0.333258	0.0880659	0.177308	0.0162078	0	0.131471	0.376993	0.201673	0	0	0	0	0.225109	0.309952	0.0533598
ENSG00000053702	NRIP2	0.297215	0.47057	0.621409	0.514792	0.635611	0.305346	0.255194	0.709872	0.647906	0.6163	0.700407	0.519933	0.409827	0.576022	0.699382	0	0	0	0	0	0.402204	0.317523
ENSG00000105278	ZFR2	0.296991	0.320616	0.370813	0.319647	0.361296	0.552392	0.345852	0.29424	0.100322	0.327357	0.291663	0.138092	0	0.352453	0.261079	0.18418	0.323081	0.276451	0.36415	0.376755	0.374691	0.375488
ENSG00000177380	PPFIA3	0.29671	0.359181	0.30871	0.384384	0.321389	0	0.312482	0.370892	0.256858	0.434641	0.353656	0.201914	0	0.314352	0.393384	0.500806	0.37095	0.435168	0.604508	0.467132	0.31034	0.363694
ENSG00000204899	MZT1	0.296678	0.311559	0.292875	0.104055	0.271629	0.0277544	0.182192	0.202507	0.454498	0.378447	0.333451	0.283091	0.0953209	0.303166	0.296663	0.0250655	0.0737526	0.0613636	0.257419	0	0.394543	0.372468
ENSG00000171132	PRKCE	0.2965	0.140432	0.196235	0.266406	0.372778	0.154437	0	0.242118	0.309349	0.027256	0.289192	0.193487	0.33277	0.290107	0.178234	0.64099	0.452204	0.52066	0.656159	0.591966	0.273649	0.427363
ENSG00000066777	ARFGEF1	0.296381	0.117751	0.282663	0.304613	0.120712	0.124937	0.25097	0.240581	0.188936	0.106845	0.169572	0	0.233244	0.338847	0.0874015	0.34039	0	0.196766	0.343225	0.334113	0.341586	0.160788
ENSG00000198836	OPA1	0.296333	0.298831	0.391238	0.352684	0.300893	0.358355	0.331104	0.386849	0.130914	0.240129	0.296619	0.268869	0.275391	0.427845	0.342535	0.371173	0.126063	0.254688	0.393885	0.399343	0.365086	0.378772
ENSG00000120451	SNX19	0.296099	0.291461	0.415615	0.132676	0.243205	0.351048	0.277155	0.577474	0	0.245747	0.202921	0.173177	0.431707	0.394382	0.298832	0.286567	0	0	0.252024	0.372706	0.229255	0.167645
ENSG00000011566	MAP4K3	0.29603	0.161902	0.304186	0.295599	0.281265	0	0.311765	0.14374	0.0517936	0	0.007469	0.327336	0.0614973	0.305172	0.18114	0.146911	0.173167	0.341231	0.522957	0.34011	0.341541	0.434544
ENSG00000187446	CHP1	0.295912	0.238519	0.351555	0.0318972	0.371796	0	0.178755	0.378694	0.271197	0.268094	0.37875	0.211324	0.124866	0.364443	0.368591	0.328969	0.210267	0.380089	0.401614	0.379041	0.302509	0.0398706
ENSG00000120800	UTP20	0.29577	0.175551	0.2048	0.0932414	0	0	0.0933791	0.301587	0	0	0.160365	0	0	0.0785889	0.0543554	0.303715	0	0	0.15762	0.244453	0.0123103	0.0818861
ENSG00000167981	ZNF597	0.29546	0.295222	0.409731	0.673272	0.171874	0.429503	0.570049	0.317783	0.315329	0.114626	0.30113	0.248579	0	0.335116	0.271665	0.213343	0.30456	0.137269	0.189511	0.1546	0.386936	0.353423
ENSG00000127585	FBXL16	0.29545	0.1029	0.23694	0.225487	0.296083	0.0272288	0.167609	0.203234	0.278776	0.364688	0.28105	0.0620681	0.221933	0.217436	0.264955	0.625526	0.437191	0.516734	0.624528	0.566291	0.250122	0.355178
ENSG00000164040	PGRMC2	0.295287	0.286434	0.344906	0.518841	0.178985	0	0.469577	0.361823	0.260678	0.203934	0.345752	0.118313	0.145455	0.381829	0.403694	0.300372	0.0190848	0.363986	0.323643	0.285743	0.326895	0.297988
ENSG00000185028	LRRC14B	0.294999	0	0	0.01397	0	0	0.0936109	0.670718	0	0	0	0	0	0.000323057	0	0	0	0	0	0	0	0
ENSG00000165325	DEUP1	0.294969	0.703429	0	0.0283294	0	0	0	0.435244	0.850746	0	0.8457	0.0880736	0	0	0	0	0	0	0	0	0.0289982	0
ENSG00000160326	SLC2A6	0.294856	0.141593	0.221233	0.296947	0.511365	0.304462	0.325953	0.320563	0.239969	0.307109	0.134418	0	0	0.365221	0.111235	0.358453	0.376071	0.22453	0.533378	0.627802	0.322845	0.284602
ENSG00000166685	COG1	0.294845	0.101106	0.177619	0.0454003	0.302129	0.0205618	0	0.0641086	0.0525059	0	0.219348	0	0	0.0581855	0.14813	0.0531111	0.337604	0	0.263037	0.315299	0.185061	0.0998714
ENSG00000108231	LGI1	0.294824	0.0781471	0.0651241	0	0.34629	0.0931536	0	0.325888	0.132339	0.202672	0.0315671	0.240949	0.26751	0	0.0224478	0.559171	0.423564	0.408811	0.626011	0.486717	0.018666	0.370816
ENSG00000123612	ACVR1C	0.294772	0	0	0	0	0	0	0	0.413188	0	0.198739	0	0	0	0	0.807032	0.0510761	0.507853	0.815791	0.07096	0	0
ENSG00000110422	HIPK3	0.294751	0.124485	0.0815314	0.321608	0.193878	0.207923	0.341958	0.138722	0.053568	0.312439	0.0957217	0	0.073262	0.262102	0.120187	0.307978	0	0.0331464	0.224988	0.273223	0.0934796	0.177396
ENSG00000145029	NICN1	0.294719	0.295356	0.343035	0.355212	0.315585	0	0.365816	0.318169	0.229656	0.204328	0.334146	0.290737	0.136698	0.383934	0.35966	0.37983	0.192101	0.405795	0.338676	0.288722	0.270372	0.37515
ENSG00000085788	DDHD2	0.29455	0.365301	0.283577	0.534913	0.301726	0.361576	0.281954	0.293109	0.316496	0.281418	0.258303	0.230918	0.349999	0.372528	0.0905719	0.317961	0	0.0708628	0.319412	0.260654	0.172193	0
ENSG00000132932	ATP8A2	0.294491	0.103646	0.366501	0.148318	0.300863	0.267411	0.0534588	0.25274	0.0640135	0	0.218019	0	0.1263	0.187752	0.0291711	0.404018	0.314346	0.133638	0.0300633	0.560967	0.112333	0.343957
ENSG00000163848	ZNF148	0.294463	0	0	0.0563697	0.0731021	0	0.208511	0.0205227	0	0.105526	0	0	0.0371658	0	0	0.424101	0.131876	0.245091	0.329393	0.285324	0	0.231705
ENSG00000174437	ATP2A2	0.2943	0.33011	0.36602	0.327245	0.236962	0.215938	0.198446	0.310071	0	0.158695	0.206774	0.10494	0.201738	0.368232	0.33086	0.264665	0.180674	0.200258	0.325078	0.459609	0.295224	0.151318
ENSG00000178950	GAK	0.294137	0.126502	0.330767	0.15083	0.303735	0	0.320168	0.247494	0	0.00948877	0.129569	0	0.149864	0.269329	0.289879	0.335618	0.0958099	0.352292	0.310694	0.35789	0.274369	0.271585
ENSG00000009335	UBE3C	0.294054	0.18069	0.376555	0.229641	0.381928	0.288491	0.235209	0.284255	0.243584	0.339156	0.27636	0	0.202274	0.384483	0.330163	0.38005	0.0221315	0.389008	0.382722	0.357963	0.326072	0.337842
ENSG00000086475	SEPHS1	0.294008	0	0	0	0.0174855	0	0	0.0704447	0.111175	0	0	0	0	0.109321	0.0486148	0	0	0	0.00253901	0	0.189852	0.133682
ENSG00000172667	ZMAT3	0.293973	0.280569	0.410595	0.532166	0.357951	0.17058	0.361836	0.418501	0.3168	0.306924	0.413258	0.320473	0.386306	0.416894	0.414709	0.328987	0	0.375187	0.273999	0.454761	0.369256	0.396228
ENSG00000131089	ARHGEF9	0.293965	0.249255	0.251148	0.272898	0.178864	0	0.203337	0.273693	0.362191	0.409703	0.282729	0.268946	0.152072	0.351566	0.317536	0.612511	0.383645	0.421657	0.532565	0.380068	0.285405	0.339379
ENSG00000160209	PDXK	0.293758	0.400656	0.563866	0.619289	0.391576	0.274602	0.289548	0.393883	0.362743	0.204025	0.539966	0.395449	0.231697	0.563601	0.614074	0	0.0904231	0.0593492	0	0	0.534092	0.57196
ENSG00000173960	UBXN2A	0.293551	0.433109	0.35669	0.347438	0.412398	0.0510934	0.188491	0.403199	0.347739	0.283232	0.36305	0.350821	0.0583556	0.459759	0.423542	0.0573882	0	0	0.19526	0.130946	0.397236	0.545862
ENSG00000198815	FOXJ3	0.293481	0.449012	0.315847	0.239099	0.354516	0	0.208616	0.357145	0.206289	0.192555	0.361936	0.18984	0.339877	0.311388	0.402633	0.435164	0.37409	0.416637	0.454513	0.369558	0.406446	0.261445
ENSG00000154447	SH3RF1	0.293259	0.0409833	0	0.619097	0	0.26708	0.564434	0	0	0	0	0.26514	0	0	0.194236	0.422993	0	0.0090368	0.607881	0.727656	0.180756	0
ENSG00000115085	ZAP70	0.293128	0.883969	0	0	0	0	0	0	0.618071	0	0.807011	0.00976488	0.10932	0	0	0	0	0	0.394115	0	0	0
ENSG00000138286	FAM149B1	0.292978	0.000808244	0.293683	0.00992991	0.16281	0	0.252989	0.242297	0.278263	0.252848	0.197337	0	0.119492	0.284247	0.232551	0	0	0.387603	0.339309	0.190744	0.20811	0.260554
ENSG00000174238	PITPNA	0.292973	0.316083	0.412781	0.17887	0.408212	0.204479	0.227418	0.344809	0.159169	0.311056	0.219301	0.153379	0.175936	0.419678	0.391575	0.339743	0.116464	0.322661	0.353374	0.327399	0.386603	0.381931
ENSG00000205060	SLC35B4	0.292933	0.151427	0.448827	0.264181	0.154969	0	0.105217	0.14824	0	0.0844836	0.161314	0.146287	0	0.469287	0.216896	0.287134	0	0.314578	0.112206	0.279245	0.353531	0.288046
ENSG00000138777	PPA2	0.292823	0.0753688	0.195448	0	0.241478	0	0	0.254016	0.267203	0.343545	0	0.236745	0.303538	0.305663	0.244078	0	0.104709	0.0285124	0	0.0589967	0.0697098	0.154935
ENSG00000143776	CDC42BPA	0.292808	0.264891	0.269284	0.308216	0.268386	0.0981918	0.326301	0.255839	0.0733743	0.359748	0.191296	0.108267	0.127473	0.339693	0.188865	0.219818	0.119913	0.111423	0.312956	0.32197	0.284345	0.179947
ENSG00000152223	EPG5	0.292732	0.279452	0.464767	0.524479	0.135184	0.3529	0.344395	0.261106	0.000911184	0.145673	0.129129	0	0	0.312503	0.269679	0.240152	0	0.323433	0.140709	0.313697	0.29888	0.393782
ENSG00000103495	MAZ	0.292437	0.0880986	0.104226	0.0560277	0.0721879	0	0.232863	0.129937	0.262499	0.255224	0.186406	0.238296	0	0.0608367	0.0564456	0.158042	0.158567	0.137628	0.305543	0.0457662	0.163442	0.254782
ENSG00000070061	ELP1	0.292427	0.316211	0.444786	0.1588	0.298544	0	0.578235	0.279193	0.00537119	0.145981	0.316917	0	0.084893	0.354493	0.220981	0.305107	0.208975	0.297717	0.288355	0.34165	0.295334	0.314712
ENSG00000172568	FNDC9	0.292106	0.201556	0.258095	0.760552	0	0	0.550173	0	0.261175	0	0.803237	0.28422	0	0	0.44057	0.720537	0	0	0	0	0.676412	0
ENSG00000152092	ASTN1	0.291723	0.308407	0.00564471	0.410676	0	0	0.425736	0.289596	0.359553	0.335794	0.359381	0.209034	0	0.201685	0.386434	0.491715	0.348703	0.437854	0.424215	0.346766	0.183604	0.40985
ENSG00000138802	SEC24B	0.291636	0.180192	0.137363	0.282566	0.0163776	0	0.284664	0.229726	0.0291579	0	0.273269	0.00972613	0.0106952	0.341013	0.244204	0.132948	0	0.0750123	0.0426357	0.15736	0.227178	0.238225
ENSG00000067057	PFKP	0.291622	0.409609	0.554864	0.185264	0.41607	0	0.133971	0.425705	0.221748	0.326713	0.397736	0.18056	0.153877	0.502292	0.390455	0.427635	0.41584	0.393047	0.415057	0.393967	0.465268	0.146151
ENSG00000147044	CASK	0.290903	0.108354	0.35635	0.336727	0	0	0.333737	0.153135	0.0969055	0.376823	0.219216	0.274673	0.0512701	0.268467	0.222877	0.312226	0.185255	0.400103	0.251935	0.283211	0.347074	0
ENSG00000107643	MAPK8	0.290749	0.376829	0.386693	0.464583	0.344637	0.137178	0.360158	0.346398	0.260247	0.213798	0.089581	0.266781	0.264864	0.406893	0.344366	0.306859	0.336436	0.431666	0.391228	0.422784	0.360345	0.359561
ENSG00000184368	MAP7D2	0.290693	0.396062	0.434107	0.654232	0.453629	0.387402	0.488754	0.420832	0.40881	0.341106	0.416463	0.345635	0.157487	0.442087	0.459658	0.249148	0.0880087	0.162038	0.351373	0.331849	0.422192	0.436114
ENSG00000124788	ATXN1	0.290583	0.199723	0.0487498	0.248284	0.0796157	0.232261	0	0.0420783	0	0.298316	0	0	0.168636	0.169009	0.0576565	0.434513	0.304288	0.426613	0.291368	0.325335	0.150494	0.619245
ENSG00000047932	GOPC	0.290458	0.0516266	0.0760567	0.333557	0	0	0.161981	0.136069	0.241363	0.295688	0	0.0826081	0	0.120937	0.18208	0.469651	0.288109	0.243757	0.26909	0.291691	0.17823	0.306761
ENSG00000108179	PPIF	0.290255	0.311132	0.653381	0.31534	0.483413	0.280959	0	0.412426	0.301918	0.0403178	0.36687	0.198599	0.323644	0.623309	0.433479	0.15739	0	0	0.102566	0.205831	0.574634	0.572619
ENSG00000061938	TNK2	0.290232	0.310484	0.599358	0.581622	0.389934	0.0885672	0.501603	0.44382	0.269942	0.0168958	0.402105	0.380097	0.374254	0.439846	0.410291	0.0996589	0	0.186526	0.223984	0.324531	0.35826	0.00198831
ENSG00000005955	NA	0.290049	0.20423	0.234397	0.269606	0.190576	0.0189235	0.271788	0.293963	0.217208	0.256913	0.310136	0.219314	0	0.292732	0.326555	0.232288	0.101173	0.270213	0.231322	0.256622	0.198635	0.3136
ENSG00000176994	SMCR8	0.289952	0.458776	0.348925	0	0.324345	0	0.290678	0.363456	0.0211491	0.133452	0.239437	0.105837	0.609402	0.349215	0.290049	0.266933	0	0.00627706	0.415665	0.256246	0.312697	0.230967
ENSG00000078142	PIK3C3	0.289904	0	0.0697478	0.00668265	0.164989	0	0	0.120296	0.0796398	0.13073	0	0	0.0790775	0.180343	0.0177906	0.186885	0	0.215845	0.0994791	0.095722	0	0.586253
ENSG00000168243	GNG4	0.28971	0.453754	0.408656	0.385486	0	0	0.571522	0.378707	0.334748	0	0.471777	0.459484	0	0.289464	0.505356	0.42644	0.411836	0.21995	0.0522387	0	0.452665	0.603587
ENSG00000198879	SFMBT2	0.289641	0.327735	0.397534	0.277354	0	0	0.597472	0.463043	0.223131	0.743152	0.417049	0.199999	0.110464	0.561389	0.260655	0.315993	0	0	0.415874	0.254627	0.522999	0
ENSG00000130590	SAMD10	0.289376	0.145504	0.34375	0.206416	0.140307	0.0167416	0	0.386914	0.418867	0.152204	0.358978	0.15607	0	0.42254	0.304391	0.0929316	0	0.278714	0.0623732	0.261433	0.422392	0.441364
ENSG00000140718	FTO	0.289333	0.17855	0.289912	0.366926	0.333097	0.0130362	0.362238	0.324095	0.361433	0.229122	0.378148	0.0717302	0.143783	0.375384	0.350024	0.057639	0.0219591	0.0615186	0.177249	0.15684	0.282564	0.397975
ENSG00000119661	DNAL1	0.289306	0.116576	0.263944	0.0429326	0.138519	0.0122472	0.225834	0.1535	0.177055	0.343344	0.143212	0	0.0346257	0.152882	0.105003	0.548266	0.372217	0.334607	0.524441	0.523456	0.264635	0.373576
ENSG00000204217	BMPR2	0.289053	0.102041	0.297019	0.538997	0.136952	0	0.450457	0.0714478	0	0	0.191036	0.0476708	0.0315508	0.230475	0.196533	0.343641	0.285916	0.381385	0.371426	0.354245	0.292156	0.297961
ENSG00000169750	RAC3	0.289036	0.328074	0.297014	0.249904	0.442591	0	0.311477	0.386925	0.448076	0.414077	0.452883	0.413877	0	0.360716	0.341061	0.140517	0.346523	0.403643	0.426395	0.155778	0.426883	0.458066
ENSG00000158623	COPG2	0.288977	0.313972	0.527241	0.539396	0.342116	0.0299622	0.339514	0.384603	0.327845	0.229182	0.588913	0.345573	0.0121658	0.516148	0.365893	0.249922	0.168069	0.0119318	0.183131	0.266034	0.386272	0.0198831
ENSG00000161011	SQSTM1	0.288967	0.351771	0.406235	0.337087	0.344391	0	0.385051	0.348575	0.346951	0.184568	0.348691	0.161185	0.107353	0.370992	0.388801	0.297916	0.249563	0.216809	0.235399	0.0985219	0.331818	0.321502
ENSG00000112159	MDN1	0.288732	0.367371	0.308597	0.430573	0.139928	0.252344	0.294315	0.30215	0.255026	0.189008	0.354236	0.389877	0.294316	0.355418	0.345931	0.20894	0.0551662	0.218364	0.256773	0.324996	0.283168	0.381519
ENSG00000218336	TENM3	0.288405	0.344797	0.360439	0	0	0	0.0609067	0.252486	0.180077	0.185891	0.0382285	0.393033	0	0.378362	0	0.362929	0.783571	0.459186	0	0.625924	0.336722	0.318607
ENSG00000181090	EHMT1	0.288346	0.342846	0.337181	0.122754	0	0	0.0554979	0.373967	0.371769	0.382291	0.350629	0.225133	0.0398396	0.376001	0.339088	0.205664	0.0254656	0.0142045	0.310751	0.289969	0.411835	0.33246
ENSG00000025800	KPNA6	0.28834	0.367865	0.458464	0.237649	0.310331	0	0.217961	0.387481	0.282474	0.323061	0.362149	0.196091	0.0471925	0.40301	0.355422	0.352539	0.34271	0.270061	0.364269	0.364345	0.390077	0.33875
ENSG00000004487	KDM1A	0.288334	0.248683	0.238703	0.0369829	0.353801	0	0.033122	0.195695	0.00469979	0.0470334	0.16707	0.146491	0	0.281315	0.306494	0.0537301	0.153052	0.0415953	0.302582	0.238008	0.193155	0.196936
ENSG00000114062	UBE3A	0.288213	0.384309	0.32528	0.308958	0.208591	0.206371	0.210685	0.343403	0.40672	0.392782	0.364897	0.310322	0.353496	0.338614	0.347412	0.304593	0.203093	0.163171	0.343059	0.271084	0.338331	0.312948
ENSG00000175764	TTLL11	0.288211	0.274502	0.51675	0.426484	0.294783	0.255387	0.203816	0.521826	0.342893	0.458264	0.0741193	0.0698256	0.393792	0.378856	0.195045	0.559237	0.4235	0.31009	0.397431	0.523751	0.241268	0.184854
ENSG00000123908	AGO2	0.287941	0.235595	0.314287	0.400862	0.150094	0.0331161	0.397217	0.202441	0.273862	0.0539311	0.24111	0.223284	0.0608289	0.335428	0.318713	0.329947	0.335214	0.35169	0.362458	0.280296	0.375143	0.371247
ENSG00000106608	URGCP	0.287926	0.34586	0.587453	0.472462	0.309995	0	0.338589	0.358432	0.279306	0	0.308002	0	0.0725936	0.349353	0.424832	0.232989	0.189545	0.102253	0.28358	0.246709	0.471452	0.249557
ENSG00000185105	MYADML2	0.287591	0.260394	0.614841	0.230591	0.6816	0	0	0.314407	0.359836	0.250532	0	0	0.742317	0.544037	0.357606	0.303831	0	0.130244	0	0.740814	0.452885	0.452204
ENSG00000139428	MMAB	0.287356	0	0.0377009	0.271523	0	0	0.0938891	0	0.169938	0.32301	0.237859	0.149824	0.138522	0	0.230141	0.337686	0	0.0223485	0	0.0131663	0.064039	0.155944
ENSG00000068796	KIF2A	0.287119	0.061275	0.0624487	0.302142	0.109249	0.252093	0.417694	0.0243399	0.0670919	0.0659028	0	0.0328257	0.0532086	0.135083	0.0899461	0.279667	0.314257	0.154558	0.370778	0.25262	0.209697	0.192292
ENSG00000101079	NDRG3	0.287048	0.292917	0.400503	0.243476	0.351322	0.167893	0.192813	0.361118	0.161903	0.337095	0.315566	0.182685	0.208824	0.404756	0.362152	0.546842	0.370253	0.336895	0.438742	0.486904	0.366405	0.354062
ENSG00000144959	NCEH1	0.286993	0.373891	0.631222	0.38332	0.433192	0.247807	0.141053	0.469919	0.315833	0.319073	0.36556	0.25978	0.405143	0.543153	0.358474	0.402613	0.100253	0.221446	0.388104	0.704588	0.503888	0.349745
ENSG00000157823	AP3S2	0.286947	0.114725	0.27253	0.0965222	0.319303	0.266202	0.344635	0.347049	0.106056	0.232731	0.0457535	0.22242	0.0266043	0.253617	0.261973	0.22851	0.258327	0.233614	0.244162	0.173832	0.299493	0.390477
ENSG00000168297	PXK	0.286868	0.536783	0.358734	0.339407	0.344607	0	0.387399	0.391967	0.223597	0.245801	0.283117	0.365994	0	0.523244	0.425824	0	0	0	0	0.01653	0.315454	0.312306
ENSG00000107140	TESK1	0.286566	0.240941	0.29271	0.1953	0.37645	0.171679	0.116308	0.502991	0.11458	0.0433288	0.304895	0	0.0525401	0.372583	0.276375	0.361553	0.169739	0.304941	0.332043	0.457309	0.29363	0.408335
ENSG00000185090	MANEAL	0.286055	0.182722	0.283458	0.307531	0.360726	0.542754	0	0.375543	0	0.318787	0.164904	0	0.293593	0.429268	0.310111	0.453893	0	0.248143	0.402801	0.56659	0.318567	0.397904
ENSG00000177731	FLII	0.28559	0.0492524	0.291872	0.195168	0.0572537	0	0.144121	0.232603	0	0	0.033493	0	0	0.303985	0.152668	0	0	0	0	0	0.286894	0.206185
ENSG00000112697	TMEM30A	0.285391	0.198425	0.159685	0.386343	0.0866378	0.206476	0.317288	0.239432	0.117015	0.145043	0.224549	0.0954697	0.180949	0.180885	0.241951	0.327018	0.145321	0.244237	0.30142	0.26236	0.177068	0.0396601
ENSG00000186416	NKRF	0.285383	0.626865	0.744598	0.64279	0.385856	0.384263	0.0940449	0.488887	0.508876	0.439223	0.524164	0.251155	0.271617	0.632267	0.635433	0.237672	0.29081	0.220386	0.261528	0.23078	0.403562	0.33676
ENSG00000088808	PPP1R13B	0.285216	0.34164	0.518315	0.560665	0.154769	0	0.186808	0.332599	0.238631	0.301046	0.370684	0.266561	0.221004	0.50057	0.341116	0.449364	0.361985	0.438626	0.611318	0.204784	0.288665	0.274677
ENSG00000109158	GABRA4	0.285034	0	0	0	0	0	0	0	0	0	0	0	0.0196524	0	0	0.63587	0.383502	0.573268	0.523629	0.593619	0	0.272488
ENSG00000182831	C16orf72	0.285011	0.0586987	0.157139	0.101297	0	0	0.405946	0.143846	0.0361596	0	0	0	0	0.116948	0.211162	0	0	0	0.116179	0	0.11558	0.323299
ENSG00000101977	MCF2	0.284908	0.674852	0.217709	0.598712	0.17709	0.877589	0.413112	0.887244	0.348332	0.220191	0.402597	0.725448	0.918523	0.919587	0.455986	0	0	0.0217532	0	0.229962	0.432632	0.211854
ENSG00000256453	DND1	0.284751	0	0	0	0.236354	0	0	0.0401918	0	0	0	0	0	0	0	0	0.0157724	0	0.0767589	0	0	0
ENSG00000051009	FAM160A2	0.284685	0.0821012	0.215135	0.159618	0.128529	0.231614	0.0344225	0.148748	0.348235	0.0265298	0.00230177	0	0.0362968	0.183632	0.20739	0.547158	0.379175	0.317535	0.38242	0.532352	0.297174	0.196114
ENSG00000110344	UBE4A	0.284635	0.281061	0.40468	0.290864	0.233665	0.0750431	0.322076	0.32693	0	0.118847	0.0620537	0.0719222	0.039639	0.402172	0.17667	0.118202	0	0.0209711	0.319223	0.306977	0.366499	0.380455
ENSG00000189079	ARID2	0.284361	0.119471	0.139275	0.22512	0.109971	0	0.177057	0.107158	0.0577882	0.228756	0	0	0	0.168868	0.00889531	0.0113969	0	0	0.17167	0.120913	0.190047	0.137274
ENSG00000166548	TK2	0.284248	0.237389	0.247415	0.212025	0.107512	0	0.161107	0.310771	0.327823	0.297309	0.348012	0.300638	0.00347594	0.298179	0.325107	0.159061	0.153859	0.295725	0.224723	0	0.347224	0.496676
ENSG00000070669	ASNS	0.284119	0.328795	0.327386	0.139395	0.233918	0	0.118837	0.245729	0.151789	0.390048	0.23904	0	0.34001	0.348714	0.0401453	0.324455	0.340118	0.274407	0.272672	0.336544	0.336284	0.197988
ENSG00000148331	ASB6	0.284087	0.00171752	0.0305455	0.0808847	0.0298651	0.031573	0	0.169767	0	0	0.184426	0	0.0179813	0.130055	0	0	0	0.200499	0.0425743	0.232948	0.00154812	0
ENSG00000162409	PRKAA2	0.284	0	0.0423586	0.364701	0	0	0.386473	0.0253727	0.23848	0.299375	0.0188369	0.0133734	0	0.0294411	0.136677	0.366635	0	0.528041	0.179282	0.417272	0.195705	0.59732
ENSG00000112304	ACOT13	0.283963	0.141089	0.102538	0	0.136536	0	0	0	0.0575484	0.0610476	0.10264	0.00857435	0	0.154749	0.0916077	0.0112814	0.0823753	0	0.0182702	0.00264787	0.121152	0.327869
ENSG00000157927	RADIL	0.28376	0.386592	0.346197	0.45359	0.474092	0	0	0.547504	0.573145	0.524565	0.339687	0.0775502	0.534494	0.322763	0.431939	0.342529	0.465129	0.235018	0.0597226	0.308696	0.198245	0
ENSG00000119401	TRIM32	0.283604	0.394875	0.401667	0.488903	0.222726	0.308251	0.377195	0.306397	0.375132	0.417979	0.347331	0.319581	0.107219	0.407851	0.397124	0.309893	0.293419	0.235249	0.310589	0.351396	0.391783	0.311872
ENSG00000196220	SRGAP3	0.283571	0.311634	0.380035	0.288321	0.536604	0.271441	0.284795	0.349825	0.201733	0.123925	0.0908963	0	0.125201	0.420756	0.343072	0.416874	0.405097	0.420386	0.569674	0.371777	0.394405	0.321039
ENSG00000088543	C3orf18	0.283558	0.263342	0.297916	0.0448793	0.496178	0.257393	0	0.76925	0.115494	0.116497	0.0554081	0	0	0.359881	0.274266	0	0	0	0	0.297152	0.432866	0
ENSG00000138942	RNF185	0.283204	0.0226308	0.376796	0	0.267885	0	0.222224	0.315788	0	0.138306	0.232572	0	0.0201203	0.270502	0.246425	0.0804432	0	0	0.204021	0.145665	0.305456	0.104756
ENSG00000107929	LARP4B	0.283096	0.15102	0.266139	0.285575	0.300054	0.00998738	0.345315	0.296209	0.300123	0.301659	0.311703	0.133414	0.0542781	0.35896	0.32676	0.239253	0.235014	0.345255	0.311755	0.2827	0.299743	0.310104
ENSG00000029153	ARNTL2	0.282897	0	0	0	0	0	0	0.716173	0.55683	0.0916667	0.281111	0	0	0.189566	0	0.61578	0.442427	0.533099	0.148277	0.827281	0	0.0161906
ENSG00000147130	ZMYM3	0.28279	0.0583956	0.240828	0.32205	0.102053	0	0.337843	0.336349	0.391711	0.212184	0.389049	0.0715383	0.115642	0.334825	0.391974	0.379228	0.423566	0.338186	0.262641	0.338755	0.391943	0.215302
ENSG00000042813	ZPBP	0.282677	0.0526903	0.347312	0.795342	0	0	0.174889	0.792402	0.434393	0.245649	0.193113	0.587953	0	0.392016	0.621136	0	0	0	0.0642847	0	0.46908	0.210176
ENSG00000164430	MB21D1	0.282497	0	0	0	0	0	0	0	0	0	0	0	0	0	0	0	0	0	0.216917	0.127562	0	0
ENSG00000198301	SDAD1	0.282132	0.224133	0.510127	0.467932	0.296362	0	0.551515	0.0681616	0.194151	0	0.13203	0.0291073	0	0.366952	0.220277	0.174386	0	0	0.231197	0.261507	0.319167	0.22917
ENSG00000142484	TM4SF5	0.281949	0.735163	0.0971374	0.236287	0	0	0	0.324513	0.927446	0.220842	0.947832	0.752864	0	0	0.821371	0	0.202195	0	0.0714339	0	0.37916	0
ENSG00000166171	DPCD	0.281632	0.401764	0.33859	0.111762	0.319083	0	0.185141	0.380262	0.418719	0.408565	0.375544	0.335357	0.301503	0.35423	0.355783	0.353551	0.338541	0.306892	0.37573	0.344683	0.363434	0.382168
ENSG00000182670	TTC3	0.281611	0.379274	0.352868	0.299532	0.29283	0.21804	0.23138	0.342812	0.388847	0.355691	0.356234	0.283649	0.31365	0.352595	0.353802	0.367081	0.240113	0.258845	0.348474	0.346235	0.346933	0.308042
ENSG00000077264	PAK3	0.281565	0.501841	0.463869	0.596476	0.295743	0.318399	0.554796	0.447538	0.460465	0.434787	0.447316	0.407441	0.244513	0.439937	0.469213	0.408738	0.318638	0.429204	0.437459	0.440656	0.471249	0.443333
ENSG00000114279	FGF12	0.281531	0.322123	0.429093	0.265082	0.263819	0.320361	0	0.316564	0.125362	0.383695	0.392699	0.0792168	0.107553	0.395764	0.361376	0.424277	0.434236	0.421448	0.22646	0.357455	0.366148	0.371553
ENSG00000159921	GNE	0.281513	0.274294	0.198189	0.112152	0	0.164638	0.279724	0.257327	0	0.00735864	0.0105224	0.214186	0	0.296069	0.281582	0.115085	0	0	0.144397	0.0920909	0.32099	0.27857
ENSG00000136045	PWP1	0.281437	0	0	0	0.0346821	0	0.263603	0	0	0.0633953	0	0	0	0	0.129841	0.146365	0	0	0.0025758	0	0.0287637	0
ENSG00000141720	NA	0.281283	0.291517	0.347203	0.317614	0.212634	0.0845959	0.297992	0.391823	0.381599	0.248084	0.443103	0.225358	0.347685	0.385185	0.402812	0.496649	0.391211	0.418998	0.543908	0.55862	0.362578	0.428302
ENSG00000137494	ANKRD42	0.281259	0.238971	0.311273	0.210573	0.511396	0	0	0.032994	0.357548	0.324579	0.256307	0	0.447114	0.300314	0.193265	0.394925	0	0.157286	0.292053	0.556417	0.250502	0.349199
ENSG00000100092	SH3BP1	0.281066	0.414585	0.385877	0.28012	0.392632	0.154647	0	0.375242	0.49292	0.459917	0.42643	0.418686	0.289081	0.404312	0.413804	0.393995	0.388904	0.36202	0.406734	0.349659	0.421771	0.413721
ENSG00000147364	FBXO25	0.281027	0.378096	0.354694	0.293533	0	0.269316	0.290704	0.297891	0.334648	0.0796626	0.331078	0.257713	0.0818182	0.180017	0.215171	0.327171	0.296917	0.232832	0.361535	0.207931	0.26293	0.285702
ENSG00000147421	HMBOX1	0.280974	0.135164	0.34766	0.0987467	0.394661	0.227507	0.513653	0	0	0	0	0	0	0.374735	0.225116	0.0558294	0	0	0	0.0873052	0.327985	0.623597
ENSG00000113742	CPEB4	0.280916	0.167136	0.0438981	0.278833	0	0.234573	0.266079	0.109657	0.0747171	0.271132	0.0478673	0.0186204	0	0.0897155	0.122468	0.37843	0.20485	0.249599	0.345511	0.289536	0.048213	0
ENSG00000164061	BSN	0.280692	0.0131845	0.217921	0.334884	0.374275	0.301482	0.390498	0.0869598	0	0.208757	0.0819711	0	0	0.25598	0.261223	0.719209	0.508486	0.707817	0.762801	0.635748	0.254638	0.442573
ENSG00000166226	CCT2	0.280637	0.15397	0.321387	0.0814283	0.127649	0.0851556	0.289989	0.264766	0.209179	0.121224	0.282763	0.16816	0.0665775	0.226966	0.280306	0.0458571	0.0770867	0.0688017	0.280891	0.106103	0.286613	0.146769
ENSG00000115464	USP34	0.280636	0.278842	0.20797	0.446578	0.00795126	0	0.388431	0.263937	0.284063	0.309713	0.301785	0.211243	0.0620321	0.225306	0.305442	0.310747	0.136698	0.165112	0.308771	0.23346	0.383149	0.387956
ENSG00000170364	SETMAR	0.280606	0	0.396062	0	0.404681	0	0	0.0128535	0	0	0	0.31374	0.444877	0	0.147643	0.0547634	0	0.149629	0.04699	0.170497	0.357458	0.396539
ENSG00000144583	2020-03-04	0.280531	0.0807377	0.186488	0	0.380837	0.151369	0.246067	0.0580486	0.0213409	0.0939329	0.30552	0	0	0.180591	0.155857	0.42256	0	0.0276515	0.0196865	0	0.417882	0.38928
ENSG00000137073	UBAP2	0.280275	0	0	0.134654	0	0.0396338	0.0887747	0	0	0	0.0270105	0	0	0	0	0.17251	0	0.219557	0.151504	0.144301	0.0645412	0.365015
ENSG00000135801	TAF5L	0.280252	0	0	0	0.0256744	0	0.0460404	0.163974	0.0139075	0	0	0	0.0209225	0.272323	0	0.219917	0.0194397	0.152241	0.0640023	0.222279	0.0878972	0.256416
ENSG00000157224	CLDN12	0.280083	0	0.158365	0.127881	0	0	0.232839	0.104494	0.0778591	0.21381	0.00169109	0	0.138844	0.0202853	0	0.314285	0	0.0369048	0	0.315278	0.120479	0
ENSG00000083642	PDS5B	0.279977	0.246659	0.333028	0.545066	0.142556	0.169788	0.419201	0.321669	0.367322	0.347865	0.187073	0.0661633	0.0131684	0.361925	0.365461	0.37209	0.0193148	0.130254	0.331944	0.29852	0.357178	0.101544
ENSG00000100490	CDKL1	0.279825	0.289347	0.325537	0.198322	0.315266	0.381976	0	0.296631	0.337824	0.265067	0.294884	0.0510997	0.0622729	0.343765	0.187233	0.317044	0.340503	0.273013	0.266373	0.372728	0.32952	0
ENSG00000027847	B4GALT7	0.279777	0.282298	0.192012	0.00024338	0.144097	0	0.0559625	0.261064	0.333972	0	0.216218	0.295515	0.191589	0.176375	0.168815	0.220221	0	0.0947855	0.0236238	0.207635	0.292139	0.296173
ENSG00000197312	DDI2	0.279632	0.184091	0.498148	0.193515	0.251842	0.119573	0.242881	0.300348	0	0.141803	0.0208568	0	0	0.3569	0.271298	0.234595	0.0271902	0	0.296118	0.240635	0.300339	0.256244
ENSG00000196189	SEMA4A	0.279631	0	0.163704	0.615351	0	0	0.285982	0.0161351	0.412229	0.143809	0.532822	0.0329545	0.138998	0.13956	0.408311	0.100427	0.318709	0	0.136976	0	0	0
ENSG00000127995	CASD1	0.279569	0.110163	0.236912	0.628021	0.269734	0	0.557238	0.221839	0.0275273	0	0.173341	0.103249	0.0980615	0.106795	0.0776432	0.30717	0.17351	0.194827	0.139664	0.364286	0.195267	0.262523
ENSG00000111728	ST8SIA1	0.279381	0.397347	0.404653	0.560104	0.391435	0.547788	0.290322	0.414306	0.357447	0.442759	0.411094	0.338471	0.411051	0.724649	0.529872	0.0760184	0	0	0.288051	0.564705	0.432504	0
ENSG00000164209	SLC25A46	0.279362	0.293938	0.375767	0.407524	0.138163	0.0994533	0.430501	0.289712	0.233748	0.293407	0.101835	0.109163	0.210718	0.334541	0.249058	0.249306	0.0217291	0.314175	0.320998	0.327496	0.340125	0.337447
ENSG00000165168	CYBB	0.279341	0	0	0.130346	0	0	0	0	0	0	0	0	0	0.0352941	0	0.076824	0	0	0	0.11698	0	0
ENSG00000127526	SLC35E1	0.278977	0.202256	0.121576	0.169977	0.19005	0	0.265536	0.331349	0	0	0.194714	0.0265549	0	0.433315	0.331728	0.216049	0.122637	0.0702455	0.167957	0.393714	0.35328	0.334465
ENSG00000183780	SLC35F3	0.278912	0	0	0.331727	0	0	0.726003	0.141809	0	0	0.00497678	0	0.427521	0	0	0.45046	0.661949	0	0.648938	0.169389	0.00574957	0
ENSG00000132434	LANCL2	0.27888	0.259879	0.345628	0.139939	0	0	0.233766	0.23692	0.0923173	0.352568	0.144072	0.00998208	0.0692513	0.372093	0.357943	0.617104	0.34728	0.569122	0.515846	0.339583	0.359228	0.40836
ENSG00000138757	G3BP2	0.278704	0.384881	0.383878	0.409188	0.215161	0.162952	0.357103	0.382937	0.387798	0.331669	0.393459	0.287277	0.168249	0.385669	0.390109	0.328345	0.260448	0.309905	0.308613	0.302173	0.370841	0.366401
ENSG00000147905	ZCCHC7	0.278639	0.142994	0.0759059	0.366977	0.00717679	0.364504	0	0.0964168	0.00892001	0.0718435	0.0962017	0	0.131283	0.161835	0.00777757	0.0873597	0.0585767	0.00924587	0.196868	0.247575	0.0312279	0.0867663
ENSG00000134369	NAV1	0.278487	0.0277834	0.228767	0.235869	0.279757	0.154331	0.366797	0.18879	0.15744	0.288806	0.0909902	0	0.080615	0.282072	0.24821	0.448338	0.364951	0.346928	0.434844	0.385444	0.287845	0.313453
ENSG00000116120	FARSB	0.278333	0.275796	0.264171	0.319679	0.156867	0	0.0468446	0.381459	0.248948	0.358947	0.352018	0.0667392	0.0641711	0.407246	0.398227	0.108664	0	0.303709	0.284478	0.186053	0.318967	0.379902
ENSG00000065491	TBC1D22B	0.278169	0.300438	0.636675	0.330319	0.167383	0	0.27605	0.275297	0.267851	0	0.328433	0.212581	0.209776	0.341997	0.589542	0.223188	0.106918	0.381361	0.331369	0.310872	0.449473	0.307447
ENSG00000163082	SGPP2	0.278045	0.455372	0.441062	0.43409	0.445274	0.390205	0	0.650036	0.142581	0.346115	0.423375	0.0951847	0.450642	0.468984	0.407943	0	0	0	0	0.443781	0.285719	0
ENSG00000204681	GABBR1	0.277953	0.304646	0.285427	0.291894	0.142865	0	0.221972	0.275543	0.284585	0.277515	0.29311	0.227092	0.215775	0.288876	0.317344	0.293325	0.21344	0.19969	0.290377	0.35326	0.302735	0.339667
ENSG00000058404	CAMK2B	0.277858	0.391118	0.378356	0.296278	0.375951	0.174622	0.20628	0.398989	0.429239	0.476636	0.42085	0.281354	0.613892	0.359418	0.403344	0.570299	0.374171	0.356865	0.586349	0.534847	0.344737	0.251089
ENSG00000160218	TRAPPC10	0.277854	0.064508	0.162675	0.11736	0	0	0.0747719	0.00282917	0	0	0	0	0.00127005	0.216614	0.0121088	0.0291468	0.0803527	0	0.0389996	0	0.0988965	0.15298
ENSG00000147454	SLC25A37	0.277832	0	0	0.158219	0	0	0	0.112482	0	0.158739	0	0	0.225479	0	0	0.158089	0	0.19069	0	0.195103	0	0
ENSG00000127249	ATP13A4	0.277464	0	0	0	0	0	0	0	0	0	0	0	0	0	0	0	0	0	0.02425	0	0.0913884	0
ENSG00000162076	FLYWCH2	0.277297	0.459301	0.382462	0.293132	0.444613	0	0	0.44209	0.469924	0.437247	0.514569	0.454009	0.323133	0.418952	0.587485	0	0	0	0.109948	0	0.429529	0.143721
ENSG00000102038	SMARCA1	0.277246	0.360274	0	0.383252	0	0	0.347505	0.171207	0.269365	0.280748	0.344982	0.031418	0	0.131219	0.158414	0.395614	0.103355	0.392203	0.241543	0.218495	0.242443	0.416702
ENSG00000053900	ANAPC4	0.276952	0.262444	0.288483	0.270758	0.318351	0	0.332666	0.246639	0.0223959	0.119789	0.197399	0	0.361989	0.319348	0.192875	0.219713	0	0.0458604	0.0765699	0.288716	0.0998299	0.248465
ENSG00000082805	ERC1	0.276371	0	0.0249114	0.0424183	0.255375	0	0.11168	0	0	0.185332	0.0434987	0	0	0	0	0.404702	0.0540929	0.350268	0.564918	0.16446	0.193432	0.728499
ENSG00000131061	ZNF341	0.27634	0	0.439462	0	0.352816	0	0	0.00509195	0	0.326087	0	0.202605	0	0	0.0190262	0.749727	0	0.370256	0.308281	0.315521	0.153326	0.294293
ENSG00000130723	PRRC2B	0.276297	0.291495	0.339241	0.278973	0.322511	0.00010513	0.317294	0.291098	0.289061	0.218293	0.340513	0.193677	0.189572	0.339604	0.32882	0.391446	0.354764	0.343531	0.415889	0.334021	0.307767	0.309871
ENSG00000176428	VPS37D	0.275907	0.331462	0.25938	0.316693	0.119034	0.198445	0.235776	0.350985	0.355205	0.265931	0.392338	0.310786	0.456679	0.35614	0.569713	0.318451	0.361383	0.348074	0.326814	0.329453	0.216294	0.354699
ENSG00000131828	PDHA1	0.275684	0.297635	0.3801	0.26028	0.313343	0	0.166795	0.324115	0.045751	0.231044	0.118944	0.000191963	0.0990642	0.34918	0.287261	0.359373	0.17688	0.33447	0.388435	0.35929	0.342695	0.35842
ENSG00000213923	CSNK1E	0.27566	0.240295	0.3021	0.113179	0.355184	0.0670732	0.0643672	0.189133	0.225323	0.322135	0.130047	0.0787049	0.325536	0.320343	0.325273	0.215959	0.159749	0.256988	0.178426	0.34366	0.208204	0.216538
ENSG00000029639	TFB1M	0.275655	0.107331	0.0454115	0.102062	0	0	0	0.218917	0	0.195187	0.0818403	0	0	0	0.354873	0	0	0.0311147	0	0	0.129141	0.0244279
ENSG00000111667	USP5	0.275637	0.283267	0.371875	0.267573	0.333294	0.0244954	0.374632	0.345863	0.241246	0.306944	0.33245	0.015485	0.136832	0.350521	0.401177	0.31996	0.186569	0.354314	0.378181	0.341572	0.376125	0.356444
ENSG00000174243	DDX23	0.274722	0.507842	0.516914	0	0	0	0	0.0697822	0.483478	0.546807	0.5146	0.28717	0	0.676089	0.453398	0	0	0	0	0	0.586348	0
ENSG00000176095	IP6K1	0.274547	0.354633	0.343993	0.366546	0.292047	0	0.363525	0.378136	0.281575	0.153385	0.383941	0.311558	0.207919	0.391138	0.397784	0.263969	0.127731	0.236612	0.342854	0.313388	0.366699	0.375839
ENSG00000147475	ERLIN2	0.274405	0	0.0422399	0	0	0	0.375888	0	0.0333301	0	0	0	0	0.0142631	0	0	0	0	0	0.134862	0.126295	0.378726
ENSG00000131467	PSME3	0.274266	0.297584	0.307501	0.174146	0.286502	0	0.34676	0.246212	0.251263	0.185306	0.291919	0.258667	0.16703	0.258101	0.336506	0.302838	0.224226	0.303761	0.386667	0.30508	0.255842	0.368525
ENSG00000110844	PRPF40B	0.274199	0.308038	0.339978	0.410147	0	0	0.157301	0.416717	0.0334261	0	0.15535	0.0997068	0.0634358	0.249901	0.143723	0.28358	0.0690576	0.0180047	0.320132	0.511514	0.293311	0.212193
ENSG00000154359	LONRF1	0.273776	0	0	0.0833162	0.154925	0	0.0129358	0.0515065	0	0	0	0	0.043984	0	0	0.276892	0	0.427886	0.445772	0.74356	0	0.165476
ENSG00000172534	HCFC1	0.273518	0.174688	0.250015	0.170256	0.172777	0	0.360222	0.261111	0.00724151	0.165535	0.265834	0.0111979	0.00735294	0.261333	0.303296	0.286268	0.251985	0.174105	0.28604	0.262319	0.215296	0.160159
ENSG00000116254	CHD5	0.273372	0.44545	0.451144	0.527657	0.434347	0.308141	0.423103	0.423225	0.428437	0.386013	0.444241	0.384047	0.3716	0.467013	0.580783	0.430166	0.444217	0.464773	0.40803	0.481218	0.477063	0.473703
ENSG00000185800	DMWD	0.273296	0.03824	0.0551409	0.384705	0.00562784	0	0.136613	0	0.0694897	0.0170411	0.0811255	0	0	0.0571357	0.0803508	0.396901	0.29884	0.311078	0.392514	0.314701	0.0634731	0.361155
ENSG00000105948	TTC26	0.273269	0.00255906	0	0	0	0.422157	0	0.0970437	0.206613	0	0	0	0	0	0.0889283	0.577176	0.140369	0	0.388023	0.122015	0	0
ENSG00000072041	SLC6A15	0.273158	0.315345	0.347717	0.463786	0.322427	0.393712	0.458464	0.334701	0.253227	0.209879	0.225703	0.125051	0.0162433	0.35331	0.44446	0.445998	0.426615	0.309489	0.440906	0.430096	0.399759	0.457403
ENSG00000196776	CD47	0.272988	0.15392	0.122224	0.213907	0.199344	0	0.226691	0.0948895	0.101765	0.041005	0.14581	0	0.131952	0.166001	0.189796	0.243131	0.195102	0.19468	0.178574	0.249364	0.265647	0.182344
ENSG00000084234	APLP2	0.272966	0.201909	0.296329	0.25574	0.220833	0.211943	0.113797	0.256147	0	0.0546088	0.192315	0.0978372	0.134492	0.308622	0.2549	0.0265671	0	0.119628	0	0.135693	0.213326	0.307788
ENSG00000035687	ADSS	0.272837	0.37708	0.388647	0.378045	0.319397	0	0.281692	0.41255	0.240785	0.127251	0.384237	0.119081	0.324397	0.387114	0.407221	0.251526	0.0137963	0.304961	0.286845	0.343838	0.295041	0.0423354
ENSG00000168917	SLC35G2	0.272795	0.400422	0.436682	0.200075	0.360388	0	0.293864	0.336034	0.316922	0.236022	0.316825	0.389997	0	0.3679	0.402434	0	0	0	0	0	0.386938	0.345363
ENSG00000128607	KLHDC10	0.272632	0.421601	0.567384	0.524248	0.384379	0	0.484417	0.469441	0.386366	0.21838	0.442237	0.33421	0.107888	0.472515	0.523036	0.321785	0.00436882	0.221547	0.424415	0.304512	0.506626	0.409614
ENSG00000145335	SNCA	0.272483	0.308244	0	0	0.374079	0	0	0	0.36809	0	0.367078	0.292417	0	0	0.297476	0.557615	0.426181	0.398923	0.604945	0.350076	0.285053	0.375408
ENSG00000169016	E2F6	0.272454	0.445908	0.406514	0.191203	0.282834	0	0.333249	0.333318	0.294982	0.0519648	0.27488	0.31841	0.179789	0.412644	0.234148	0.0207936	0	0.14132	0	0.0757924	0.350549	0.336528
ENSG00000203727	SAMD5	0.272238	0.199123	0.603484	0	0.387024	0	0	0.0250643	0.152733	0	0.185318	0	0	0.74486	0.256092	0	0	0	0.0857061	0.0992216	0.273059	0
ENSG00000138018	SELENOI	0.272151	0.2164	0.349868	0.230178	0.19551	0	0.237797	0.345128	0.157969	0.21755	0.250213	0.145188	0.0831551	0.357573	0.372501	0.31729	0	0.137394	0.086468	0.279407	0.327858	0.169089
ENSG00000153989	NUS1	0.271822	0.177897	0.24374	0.386686	0.00929368	0	0.420502	0.169359	0.215658	0.264404	0.224541	0.0824162	0.146056	0.23471	0.362907	0.349727	0.203158	0.370927	0.26035	0.250619	0.345132	0.357329
ENSG00000105953	OGDH	0.271728	0.315802	0.501874	0.388401	0.437234	0.126787	0.338825	0.401761	0.0861788	0.102053	0.35082	0.102572	0.169051	0.522203	0.390247	0.17343	0.0785813	0.262146	0.263868	0.319144	0.399872	0.321867
ENSG00000178951	ZBTB7A	0.271531	0.256905	0.349018	0.281417	0.303793	0.0902019	0.0478734	0.353696	0.195108	0.341326	0.237577	0.186204	0.261466	0.448997	0.335578	0.212366	0.0987583	0.251586	0.24639	0.336562	0.237375	0.322139
ENSG00000184205	TSPYL2	0.271371	0.535395	0.416277	0.602544	0.151666	0	0.51306	0.463735	0.486282	0.397154	0.594257	0.458607	0.234561	0.405959	0.623427	0.144016	0	0.125098	0.30677	0.176237	0.43047	0.288184
ENSG00000138768	USO1	0.271165	0.295196	0.322158	0.277009	0.162478	0.0458368	0.361346	0.339122	0.0523211	0.0381971	0.177055	0	0	0.386043	0.333654	0.169477	0.0435732	0.120159	0.310543	0.266637	0.309616	0.23304
ENSG00000196104	SPOCK3	0.271033	0.219242	0.336357	0.295124	0	0	0.421622	0.308735	0	0	0.195434	0.0286665	0	0.275471	0.410824	0	0	0	0.0141343	0	0.41106	0.38229
ENSG00000187806	TMEM202	0.270954	0.194937	0.0119176	0	0.214981	0.480912	0.0494251	0	0.238367	0.30719	0.330102	0.17345	0	0	0.274148	0.0995585	0.0168779	0	0.0661491	0.183429	0	0.3927
ENSG00000173226	IQCB1	0.270748	0.346667	0.314658	0.29754	0.254258	0	0.13567	0.363719	0.432668	0.356626	0.413355	0	0.0585561	0.288226	0.338034	0.152713	0.216762	0	0.212566	0.186879	0.318078	0.295759
ENSG00000143494	VASH2	0.270485	0.231672	0.0842346	0.0173773	0.732089	0	0	0.399869	0.193337	0	0.507043	0.232214	0	0.380415	0	0	0	0	0	0	0.119342	0.154947
ENSG00000137218	FRS3	0.270376	0.655942	0.653899	0	0.344074	0	0.0733207	0.578954	0.543901	0.409582	0.466914	0.395831	0.2288	0.566351	0.617652	0	0	0	0.0749408	0	0.504635	0.182857
ENSG00000145391	SETD7	0.270211	0.0210649	0	0.283818	0.197643	0.411307	0.368749	0.198831	0	0.370077	0	0	0.160207	0.270251	0	0.133255	0	0.153357	0.348439	0.218874	0.0857661	0.580427
ENSG00000204310	AGPAT1	0.269942	0.242661	0.253198	0.211158	0.223114	0	0.212262	0.25512	0.313214	0.0685999	0.357161	0.257495	0.00561497	0.356908	0.561346	0.356576	0	0.302022	0.322493	0.384898	0.362571	0.21501
ENSG00000008118	CAMK1G	0.269903	0.339476	0.567435	0.654559	0.387128	0.04	0.395661	0.390816	0.275111	0.26779	0.495304	0.29477	0.655329	0.558903	0.758989	0	0	0	0.258656	0.673959	0.354957	0.233856
ENSG00000214517	PPME1	0.269792	0.270055	0.350627	0.374493	0.325048	0	0.377534	0.190241	0.115193	0.167029	0.325944	0.208495	0	0.40373	0.353607	0.323823	0.220664	0.302103	0.335687	0.359102	0.333835	0.452671
ENSG00000075292	ZNF638	0.269673	0.10199	0.140092	0.18209	0	0	0.123055	0	0	0.0216886	0	0.0863834	0.0999332	0.0448686	0	0.190308	0.0777765	0.198795	0.0935345	0.145116	0.11612	0.008233
ENSG00000152904	GGPS1	0.269611	0	0	0.0905801	0	0.189185	0	0	0.321487	0.151755	0	0	0	0	0.0109445	0.170059	0	0.119421	0.151366	0.118938	0	0.297688
ENSG00000132466	ANKRD17	0.269441	0.292902	0.31772	0.325866	0.246744	0	0.298183	0.327644	0.26493	0.179202	0.318934	0.237979	0.203743	0.281957	0.285012	0.271636	0.0715107	0.251773	0.217052	0.327699	0.26582	0.285234
ENSG00000189241	TSPYL1	0.269439	0.419404	0.422372	0.450974	0.331705	0.0387931	0.406298	0.433806	0.414626	0.405381	0.409655	0.380666	0.284913	0.42817	0.434231	0.328031	0.134169	0.290641	0.373074	0.338474	0.402211	0.373002
ENSG00000102595	UGGT2	0.269354	0.0959679	0.180791	0.0539265	0	0	0	0.472579	0.253489	0.271153	0.484846	0.103953	0.437855	0.193751	0.519783	0.202236	0	0.0782713	0.276601	0.274003	0.0142427	0.198606
ENSG00000113638	TTC33	0.268942	0.357517	0.246256	0.405532	0.0133209	0.0170311	0.397913	0.343239	0.260448	0.307503	0.409895	0.202917	0	0.296783	0.386986	0	0.011267	0.0656508	0.0572228	0	0.17426	0.372107
ENSG00000048140	TSPAN17	0.268904	0	0	0	0.317514	0	0.188497	0.0712682	0	0.177701	0	0.0213719	0	0.00432468	0	0	0	0.225556	0.405003	0.333139	0	0.386528
ENSG00000133958	UNC79	0.268616	0.308756	0.338329	0	0.128062	0	0.0440657	0.314961	0.292641	0.333192	0.279849	0	0.504167	0.330489	0.163088	0.398032	0.268829	0.391121	0.390631	0.608201	0.374507	0.335952
ENSG00000197056	ZMYM1	0.268284	0	0	0.844557	0	0	0.342815	0	0.0144008	0	0	0	0.0564555	0	0	0	0	0.0388528	0.0677204	0	0	0.162179
ENSG00000139163	ETNK1	0.268268	0.357624	0.380868	0.418828	0.210171	0.249677	0.352337	0.382332	0.337921	0.324254	0.381069	0.231401	0.270021	0.411565	0.382131	0.304385	0.182743	0.326023	0.303635	0.330373	0.378432	0.325662
ENSG00000115109	EPB41L5	0.268013	0	0	0.0517426	0	0	0.0603672	0	0	0	0	0	0	0	0	0	0	0	0	0	0	0.256804
ENSG00000141837	CACNA1A	0.267835	0.27617	0.314494	0.409342	0.419915	0.276798	0.504318	0.39725	0.367546	0.580578	0.316349	0.245108	0.384524	0.384866	0.275524	0.402577	0.0429984	0.353918	0.466077	0.530714	0.343229	0
ENSG00000111652	COPS7A	0.267613	0	0.0523885	0	0.203575	0	0.079598	0.125672	0.0409073	0.318707	0.113273	0.0680189	0	0.176198	0.0513692	0.295667	0.316921	0.22787	0.256103	0.273035	0.0510439	0.33033
ENSG00000149243	KLHL35	0.267559	0	0	0	0	0	0	0	0	0	0.00293077	0	0	0	0	0.00963648	0	0	0.152059	0.0641159	0	0
ENSG00000159128	IFNGR2	0.267288	0	0.115203	0.0626221	0.186135	0	0.0406637	0.305117	0.351328	0.374039	0.358103	0.145529	0	0.126838	0.235774	0.451528	0.241838	0.317596	0.597221	0.364521	0.00389243	0.245379
ENSG00000139192	TAPBPL	0.267215	0	0	0	0	0	0.173845	0	0	0	0	0	0	0	0	0	0	0	0	0	0	0.112499
ENSG00000215218	UBE2QL1	0.266814	0.592174	0.647864	0.525753	0.623658	0	0.439242	0.606348	0.38546	0.410407	0.589881	0.443056	0.555413	0.60175	0.624824	0.594143	0.46299	0.507518	0.622979	0.63542	0.430844	0.460423
ENSG00000185359	HGS	0.266483	0.0745605	0.0865856	0.317614	0.318475	0.0149285	0.31485	0.32588	0.0404757	0	0.112082	0	0	0.251459	0.192515	0.149267	0.00212693	0.181093	0.129836	0.253367	0.228974	0.196744
ENSG00000198824	CHAMP1	0.266351	0.370749	0.407846	0.281594	0.108162	0	0.294953	0.207137	0.296918	0.363201	0.291042	0.185936	0.0763369	0.32114	0.275688	0.267046	0.188455	0.320978	0.33843	0.260665	0.370987	0.404256
ENSG00000103160	HSDL1	0.266331	0.405028	0.378467	0.350945	0.221903	0	0.393965	0.42763	0.331861	0.135165	0.396749	0.366548	0.160028	0.415799	0.399676	0.163256	0.0538163	0.233727	0.290408	0.254294	0.408938	0.407999
ENSG00000136895	GARNL3	0.266294	0.356499	0.381704	0.266294	0.362153	0.38403	0.153677	0.423414	0.0967591	0.254493	0.371949	0.267734	0.381603	0.367804	0.412181	0.2208	0.353254	0.447464	0	0.549143	0.29712	0.304031
ENSG00000113013	HSPA9	0.266164	0.2717	0.392922	0.299243	0.264148	0.304182	0.321043	0.29877	0.0834932	0.0480732	0.0772736	0.100653	0.0681818	0.347764	0.330642	0.019752	0.0859393	0.086312	0.0367235	0.207267	0.380874	0.234156
ENSG00000111897	SERINC1	0.266104	0.304341	0.289106	0.278383	0.198523	0.166632	0.221732	0.261689	0.171686	0.215192	0.217775	0.181469	0.218583	0.280911	0.274483	0.329275	0.224074	0.232128	0.302735	0.340162	0.255503	0.195335
ENSG00000121753	ADGRB2	0.266032	0.333831	0.177924	0.0741989	0.0897182	0	0.0495332	0.285011	0.24957	0.204021	0.13352	0.192479	0.0571524	0.216072	0.21682	0.646565	0.547097	0.479413	0.654591	0.758674	0.121503	0.0871976
ENSG00000175356	SCUBE2	0.266003	0.568147	0	0.509742	0	0.495698	0	0	0	0	0.00409202	0	0.356908	0	0	0	0	0	0.728362	0.15323	0.701828	0.566436
ENSG00000213760	ATP6V1G2	0.265902	0.417092	0.38717	0.332009	0.394575	0.188183	0.16027	0.404708	0.452279	0.447207	0.411203	0.40867	0.383317	0.409474	0.431613	0.439422	0.399419	0.393733	0.440645	0.372033	0.390222	0.422187
ENSG00000107021	TBC1D13	0.265786	0.268059	0.251187	0.360238	0.412686	0.0348315	0.370086	0.276235	0.18266	0	0.129029	0	0	0.313342	0.291475	0.0910637	0	0.220061	0.281874	0.214005	0.359968	0.349862
ENSG00000099910	KLHL22	0.265721	0.347219	0.394815	0.300442	0.28748	0.125279	0.355548	0.327652	0.308503	0.289241	0.402856	0.157293	0.379755	0.384891	0.263183	0.337997	0.0785527	0.267626	0.447808	0.454188	0.379175	0.396428
ENSG00000182827	ACBD3	0.26569	0	0.248229	0.284081	0.120415	0	0.399118	0	0.000623441	0	0	0	0	0.12358	0.0208178	0.026318	0.127783	0	0.0630617	0	0.0107042	0.0292566
ENSG00000129282	NA	0.265349	0.100868	0.512576	0.0687056	0.334425	0.483338	0.0831788	0.32652	0	0	0	0.124228	0.0469241	0.332851	0.342022	0.0191946	0	0.0763995	0	0.24811	0	0
ENSG00000138081	FBXO11	0.265261	0.227196	0.33077	0.636405	0	0.235529	0.444843	0.27328	0.320974	0.231709	0.280938	0.182431	0.12012	0.278358	0.274435	0.258111	0.270653	0.301931	0.376939	0.125224	0.299131	0.278785
ENSG00000143367	TUFT1	0.265201	0.424158	0.488899	0.263288	0	0.345399	0.200357	0.106387	0.160125	0.328495	0	0.318376	0	0.844186	0.0125307	0	0.0812205	0	0.00618193	0	0.379706	0
ENSG00000078902	TOLLIP	0.264918	0.381362	0.422135	0.330174	0.295295	0.11701	0.384145	0.403326	0.237093	0.253896	0.404695	0.331265	0.0953877	0.429464	0.423928	0.211093	0	0.256174	0.307449	0.341836	0.408522	0.316649
ENSG00000126261	UBA2	0.264757	0.0577895	0.157626	0.217986	0.160842	0	0.269388	0.0195797	0	0	0	0	0	0.151992	0.030924	0.0317265	0.0938147	0.00165289	0.00305172	0.0139319	0.0318029	0
ENSG00000185324	CDK10	0.264726	0.257702	0.19668	0.0394194	0.182809	0	0	0.370665	0.28764	0.301368	0.280793	0.0646916	0.0722594	0.354754	0.312701	0.303018	0.134204	0.147789	0.28738	0.346678	0.180436	0.482135
ENSG00000198862	LTN1	0.264483	0.0566781	0.197144	0.213767	0.0950214	0	0.261794	0.0367899	0	0	0.120753	0	0	0.207607	0.1115	0.288401	0.018625	0.35231	0.262976	0.311856	0.213128	0.185771
ENSG00000167861	HID1	0.264379	0.261801	0.15581	0.314301	0.380222	0	0.371753	0.290972	0.172306	0.23626	0.389017	0.0598925	0.0178476	0.26264	0.326189	0.316899	0.363486	0.241905	0.285334	0.472598	0.189314	0.282194
ENSG00000173482	PTPRM	0.264353	0.137372	0	0.332216	0	0	0.361658	0.0703334	0	0.464964	0	0.166547	0	0	0.00163003	0	0	0	0	0	0.0483718	0.743731
ENSG00000101180	HRH3	0.264176	0.408706	0.457611	0.277521	0	0.110962	0	0.0541684	0.351308	0.373517	0.242957	0.0429997	0	0.343512	0.328808	0.181749	0.702061	0.833952	0	0.854513	0.105098	0.367579
ENSG00000168439	STIP1	0.263691	0.391206	0.428924	0.324663	0.373167	0.278554	0.378815	0.416968	0.286729	0.204317	0.354341	0.193714	0.0721925	0.442136	0.424503	0.169234	0.161495	0.096431	0.0932532	0.120763	0.412852	0.4185
ENSG00000141664	ZCCHC2	0.263677	0	0.216073	0.240188	0.186421	0	0.356523	0.22797	0	0.014059	0.0248286	0	0	0.188944	0.287839	0.293745	0	0.576581	0.24531	0.129624	0.313405	0.0127009
ENSG00000171475	WIPF2	0.263655	0.31609	0.266574	0.372717	0.342985	0.190441	0.283947	0.34468	0.205961	0.1864	0.325159	0.386465	0	0.327117	0.304496	0.326005	0.32216	0.192097	0.368907	0.426543	0.286738	0.380794
ENSG00000157625	TAB3	0.263419	0.110478	0.374637	0.537594	0.136254	0	0.548214	0.544483	0.213751	0.260079	0.326088	0.32314	0.248311	0.292837	0.594945	0.20952	0	0.0880411	0.32916	0.120614	0.119258	0.202447
ENSG00000119689	DLST	0.263371	0.352201	0.645585	0.230806	0.499657	0.350335	0.155605	0.343741	0.0135718	0.00726181	0.0695697	0	0.213778	0.588712	0.528651	0.298154	0.0412164	0.150544	0.28065	0.37596	0.447187	0.391447
ENSG00000167881	SRP68	0.263286	0.0388967	0.10153	0	0.0571918	0	0.130168	0.0813035	0.0551985	0.0189291	0.280687	0	0	0.287291	0.312862	0	0	0	0	0.130456	0.0774062	0.0556636
ENSG00000186479	RGS7BP	0.263203	0	0.269786	0	0	0.180471	0	0.0971764	0	0.364899	0	0	0.228547	0.337018	0	0.455361	0.391456	0.352856	0.415396	0.56005	0.11744	0.52835
ENSG00000111218	PRMT8	0.263191	0	0.138311	0.0792831	0	0.651424	0.414157	0.0252829	0	0.318273	0	0	0	0.0384647	0	0.631419	0.358075	0.391167	0.423113	0.442036	0.299781	0.0233574
ENSG00000145819	ARHGAP26	0.263178	0.144822	0.309697	0.307296	0	0	0.357294	0.141677	0.413952	0.351106	0.404227	0.130962	0.275175	0.374144	0.42717	0.265919	0.334258	0.387803	0.385068	0.628732	0.426743	0.382728
ENSG00000085871	MGST2	0.263126	0.730674	0	0.613964	0	0	0	0.402226	0	0	0	0	0	0.603201	0	0	0	0	0	0	0.00537692	0
ENSG00000130779	CLIP1	0.263048	0.174009	0.234335	0.26414	0.018639	0	0.363827	0.0842733	0.244799	0.185654	0.228578	0.124333	0	0.266903	0.195669	0.387629	0.303878	0.3788	0.498683	0.3758	0.27978	0.279873
ENSG00000130559	CAMSAP1	0.262762	0.288837	0.331283	0.292161	0.276379	0	0.309495	0.327447	0.312327	0.354029	0.321085	0.340068	0.218036	0.382462	0.402428	0.409135	0.177072	0.349139	0.360682	0.381025	0.363729	0.403273
ENSG00000171368	TPPP	0.262548	0.4006	0.247946	0.253234	0	0	0.206352	0.250051	0.34089	0.170168	0.350291	0.189276	0.138436	0.174705	0.440183	0.388626	0.158887	0.35339	0.428229	0.266806	0.281491	0.309851
ENSG00000141376	BCAS3	0.262147	0	0.0109629	0.182098	0.205947	0.20019	0.120716	0	0	0.0844164	0	0	0.068115	0.0249917	0	0.161874	0	0	0.195854	0.0331181	0	0.0555868
ENSG00000162989	KCNJ3	0.262063	0.296463	0.172139	0.163385	0.175226	0.433455	0.37354	0.322311	0.229509	0.43256	0.191092	0	0.677507	0.238942	0	0.725041	0.427052	0.342104	0.591744	0.702144	0	0.528589
ENSG00000134440	NARS	0.261965	0.341997	0.398906	0.27578	0.364292	0.0583474	0.262991	0.357165	0.225588	0.208263	0.297625	0.208792	0.166845	0.410598	0.333692	0.19959	0.148942	0.132057	0.314391	0.290076	0.359593	0.410177
ENSG00000076826	CAMSAP3	0.261822	0.351452	0.310672	0.102115	0.376526	0	0.296993	0.637427	0.281865	0.223425	0.283962	0.381733	0	0.534651	0.352571	0.322102	0.0298496	0.219006	0.317217	0.328999	0.489642	0.41996
ENSG00000116604	MEF2D	0.261815	0.0632956	0.279973	0.149011	0.314982	0.216126	0.264282	0.305924	0.316465	0.378808	0.16122	0	0.267434	0.256085	0.289736	0.592965	0.40153	0.394362	0.39883	0.502165	0.273746	0.202537
ENSG00000185149	NPY2R	0.261649	0.0182083	0.0509893	0.773915	0	0	0	0	0	0	0	0	0	0	0	0	0.0804098	0	0.940191	0	0.939507	0
ENSG00000243279	PRAF2	0.261415	0.205681	0.221048	0.11042	0.32441	0.0256518	0.130088	0.350471	0.160884	0.311152	0.263906	0.0538137	0.124666	0.340462	0.156734	0.30333	0.143366	0.140953	0.234154	0.254685	0.293051	0.410805
ENSG00000105726	ATP13A1	0.261219	0.069355	0.0880152	0.0813234	0.243557	0	0	0.0407663	0.0293844	0	0.102829	0.234518	0.0370989	0.153892	0	0.252262	0.107782	0	0.0964127	0.507618	0.00623673	0
ENSG00000152642	GPD1L	0.261112	0.201754	0.146572	0.0694792	0	0.0211312	0.241924	0	0.0770572	0.235011	0.0812828	0	0.0432487	0.229288	0.0522075	0.559653	0.38661	0.534871	0.394235	0.417253	0.19973	0.349739
ENSG00000151553	FAM160B1	0.260892	0.194706	0.174334	0.354912	0.0976733	0.0970203	0.116437	0.306363	0	0	0	0	0	0.29547	0.185285	0.219454	0	0.345455	0.00224463	0.130909	0.0974189	0.171912
ENSG00000086015	MAST2	0.260741	0.0714791	0.325917	0.30998	0.395679	0.363985	0.246074	0.351876	0.0500671	0.0521882	0.158158	0.240199	0	0.393923	0.374569	0.211186	0.263484	0.151887	0.315396	0.310917	0.318187	0.520042
ENSG00000160460	SPTBN4	0.26055	0.492946	0.622508	0.385805	0.61218	0.448108	0.24611	0.590818	0.256995	0.431279	0.310276	0.114432	0.589792	0.638617	0.476276	0.57403	0.241305	0.39573	0.415188	0.668171	0.45407	0.335755
ENSG00000116918	TSNAX	0.260384	0.183359	0.155808	0.0509965	0	0	0.180021	0.0114065	0.317947	0.289317	0.278526	0.0957896	0	0.111515	0.175841	0.35026	0.159605	0.268541	0.31093	0.233105	0.191407	0.0710954
ENSG00000102996	MMP15	0.26027	0	0	0	0	0	0	0	0	0	0	0	0	0	0	0	0	0	0	0	0.196981	0.0569299
ENSG00000088538	DOCK3	0.25994	0.274227	0.367768	0.301604	0.335693	0.0689655	0.240947	0.37055	0.327044	0.424876	0.374391	0.317766	0.660421	0.351617	0.330202	0.619997	0.419388	0.351008	0.211614	0.585374	0.333238	0.333606
ENSG00000071894	CPSF1	0.25978	0.347899	0.137341	0	0.342101	0	0	0.423427	0	0.219105	0	0	0.45585	0.0150192	0.141878	0.0914755	0.3478	0.0179113	0	0.290463	0.0461447	0.180727
ENSG00000222011	FAM185A	0.259768	0.576405	0.352967	0.0250195	0.0390173	0	0.0777541	0.486273	0.288489	0.349874	0.291274	0.304845	0	0.410094	0.211849	0.35838	0.159478	0.236039	0.196898	0.3801	0.337594	0.385075
ENSG00000145882	PCYOX1L	0.259747	0	0	0	0	0.205681	0	0	0	0	0	0	0	0	0	0	0	0	0	0	0	0.111997
ENSG00000142168	SOD1	0.259728	0.322469	0.362331	0.0989644	0.299235	0.101346	0.136048	0.320804	0.256534	0.26102	0.277462	0.228871	0.108957	0.362135	0.310323	0.0696519	0.238051	0.111829	0.310635	0.105818	0.292997	0.175341
ENSG00000115073	ACTR1B	0.259535	0.232688	0.300055	0.261142	0.30332	0.146236	0.335381	0.343145	0.158144	0.341248	0.210219	0.144548	0.185027	0.368239	0.306496	0.381584	0.126351	0.303143	0.368999	0.376874	0.287112	0.256974
ENSG00000134058	CDK7	0.259529	0.0911626	0.117783	0	0.0930271	0	0.0232289	0.331583	0	0.237362	0.246021	0	0.0119652	0.178843	0.0263345	0.215095	0	0.320371	0.24337	0.404614	0.0847199	0.182602
ENSG00000152969	JAKMIP1	0.259495	0.0907254	0.128282	0.313152	0.138855	0	0.276333	0.297669	0.428686	0.440123	0.400815	0.428801	0.240165	0.223073	0.302412	0.440759	0.22945	0.420971	0.284797	0.410113	0.176477	0.166598
ENSG00000103365	GGA2	0.259455	0.184654	0.108227	0.278628	0	0	0.413669	0.277844	0.210714	0.0488085	0.315126	0.0638597	0.24105	0.310981	0.328799	0.120207	0	0.309024	0.231088	0.0822889	0.156449	0.226067
ENSG00000184702	2020-09-05	0.259453	0	0	0	0.0609827	0	0	0	0	0.330433	0	0	0	0	0	0.470807	0.324206	0.175032	0.310984	0.325501	0	0
ENSG00000161958	FGF11	0.259411	0.509558	0.527621	0	0	0	0	0.477091	0	0	0	0	0	0.8717	0.460042	0	0.477185	0.302177	0.325022	0.485059	0.816311	0.896276
ENSG00000176102	CSTF3	0.259088	0.394067	0.245492	0.214528	0.103538	0	0.171079	0.31587	0.446607	0.353326	0.423447	0.417953	0.304935	0.194133	0.374156	0.372128	0.30529	0.0604339	0.343187	0.226865	0.348931	0.259946
ENSG00000100731	PCNX1	0.259005	0.0979996	0.123224	0.299875	0.0015896	0	0.200048	0.154956	0.153972	0.0836561	0.223139	0	0.0266711	0.161192	0.27872	0.308566	0.250014	0.326877	0.612123	0.528795	0.259581	0.0945795
ENSG00000153561	RMND5A	0.258802	0.266991	0.291219	0.309746	0.20768	0.109858	0	0.31852	0.14545	0.284143	0.150088	0	0.249127	0.381897	0.27644	0.182359	0.112654	0.219591	0.3081	0.267433	0.185757	0.0221362
ENSG00000162728	KCNJ9	0.258651	0.445219	0.286768	0.0824944	0.0106877	0.198751	0.215506	0.390754	0.404051	0.529674	0.145853	0.366615	0.154305	0.350011	0.195209	0.561454	0.568627	0.429157	0.198923	0.749547	0.210505	0.32126
ENSG00000157557	ETS2	0.258372	0.358608	0.25742	0.557328	0	0.324208	0.185818	0.529213	0.543005	0.254294	0.605239	0.432545	0.148356	0.238702	0.125325	0.468213	0.346634	0.405045	0.353	0.689882	0.0493631	0
ENSG00000175175	PPM1E	0.25835	0.221742	0.386592	0.207979	0.509278	0	0.0103216	0.288866	0	0	0	0.0526619	0	0.520796	0.322317	0.621362	0.417975	0.531183	0.65898	0.660117	0.41815	0.504614
ENSG00000113595	TRIM23	0.257747	0.236721	0.290144	0.226772	0.0282755	0	0.492011	0.118744	0.0919721	0.163844	0.222151	0.00934221	0.125618	0.18975	0.45038	0.289559	0.191802	0.152733	0.360189	0.28836	0.317623	0.269262
ENSG00000118946	PCDH17	0.257676	0.364064	0.393866	0.536643	0	0	0.51795	0.327989	0.419522	0.24237	0.499854	0.138149	0	0.29256	0.308718	0	0.293402	0	0.194614	0.25788	0.402923	0.32355
ENSG00000169992	NLGN2	0.257603	0.230258	0.389989	0.411505	0.300287	0.0490959	0.407008	0.395321	0.357577	0.326911	0.292197	0.121385	0.152005	0.397082	0.403164	0.433023	0.122442	0.397398	0.413062	0.550734	0.392683	0.461838
ENSG00000103404	USP31	0.257498	0.00197009	0	0.213488	0.1317	0.16666	0.128599	0.0472876	0	0	0	0.026043	0.13389	0.0372172	0.032228	0.207935	0.0851345	0.224857	0.275567	0.229861	0	0.0377466
ENSG00000177051	FBXO46	0.257286	0	0	0.0672702	0	0	0.0323628	0.0537585	0	0	0.151064	0.256735	0	0.0606123	0.0392799	0.0786939	0.0313237	0	0	0	0	0.080831
ENSG00000102921	N4BP1	0.257219	0.293607	0.361083	0.363123	0.202251	0	0.39857	0.366226	0.357174	0.250284	0.337939	0.379204	0.0167112	0.355435	0.345075	0.14881	0.105947	0.123384	0.0574576	0.228331	0.324421	0.314733
ENSG00000185129	PURA	0.256965	0.380163	0.38086	0.458065	0.275774	0.231497	0.311261	0.361584	0.340914	0.298381	0.339854	0.29574	0.302631	0.376612	0.359981	0.257892	0.165958	0.247882	0.260647	0.256792	0.348336	0.315708
ENSG00000135720	DYNC1LI2	0.256894	0.312789	0.388031	0.388241	0.237784	0.242057	0.328738	0.363275	0.191591	0.20168	0.223307	0.135718	0.133824	0.397508	0.393618	0.32526	0.200326	0.343846	0.255931	0.360077	0.3538	0.3406
ENSG00000164924	YWHAZ	0.256758	0.184633	0.27893	0.271509	0.213123	0.0383726	0.246707	0.269076	0.284471	0.292795	0.267116	0.205529	0.217246	0.253025	0.298795	0.396077	0.284806	0.358779	0.405578	0.28949	0.302045	0.355057
ENSG00000181789	COPG1	0.256705	0.411102	0.517072	0.331243	0.436112	0.28586	0.273084	0.432968	0.398329	0.365712	0.418143	0.307521	0.369285	0.458197	0.434035	0.304724	0.165038	0.210227	0.34431	0.323567	0.421721	0.42103
ENSG00000010818	HIVEP2	0.256561	0	0	0.011186	0.565594	0	0	0	0	0	0	0	0.194296	0	0	0.566838	0.511517	0.475017	0.609927	0.674769	0	0
ENSG00000184602	SNN	0.256523	0.0185391	0.249187	0.133223	0.0673276	0.065286	0	0.365171	0.169795	0.218086	0.276266	0.093742	0.303746	0.177249	0.0502049	0.552414	0.183745	0.34361	0.516183	0.231076	0.00203468	0.150688
ENSG00000044090	CUL7	0.256428	0.0436136	0.193747	0.16439	0.17068	0	0.100019	0.196773	0.2536	0	0.357045	0	0	0.200152	0.155955	0	0	0	0	0	0.290112	0.0853311
ENSG00000100445	SDR39U1	0.256373	0.522842	0.495638	0.377756	0.414102	0.121626	0	0.417214	0.416831	0.48723	0.433176	0.404447	0.0470588	0.502838	0.401602	0.306248	0.00511612	0.281533	0.237484	0.285006	0.433798	0.188551
ENSG00000011295	TTC19	0.256272	0.121439	0.298788	0.352144	0.233493	0.0751682	0.169215	0.334859	0.362035	0.335158	0.309989	0.241134	0.243117	0.309484	0.314361	0.348998	0.158793	0.358483	0.360981	0.536783	0.257987	0.383497
ENSG00000005238	FAM214B	0.256176	0.00479895	0	0.0239969	0.136824	0	0.341352	0.0803604	0.0901508	0.212235	0.0749569	0	0	0.0118513	0.0680076	0	0	0.00640496	0.183619	0.0734427	0	0.200297
ENSG00000157954	WIPI2	0.256151	0.131996	0.251987	0.316088	0.170253	0	0.340499	0.289307	0.284131	0.264068	0.334178	0.0998208	0.135561	0.309024	0.306364	0.185362	0.0413888	0.267045	0.262344	0.24356	0.273369	0.353651
ENSG00000158882	TOMM40L	0.255997	0.185619	0.184634	0.071142	0.392865	0	0.0581756	0.103095	0.220328	0.187643	0.134688	0.0763373	0	0.254687	0.367682	0.210394	0.208926	0.261469	0.378415	0.249781	0.234509	0.416214
ENSG00000136295	TTYH3	0.25588	0.197174	0.267872	0.346023	0.324411	0.038688	0.44404	0.338707	0.170468	0.090579	0.302952	0.14474	0	0.408039	0.480992	0.379188	0.0625431	0.295836	0.296966	0.37058	0.242925	0.240782
ENSG00000243449	C4orf48	0.255599	0.379312	0.324994	0.0540739	0.274407	0	0.0206432	0.283046	0.407016	0.351596	0.363285	0.354618	0.0689171	0.292893	0.372013	0.277744	0.158715	0.124845	0.245281	0.257942	0.367926	0.371369
ENSG00000178234	GALNT11	0.255208	0.218811	0.269104	0	0.223308	0	0.000726141	0.102413	0.0786016	0.118821	0.0281849	0.104812	0	0.183953	0.374236	0.18647	0	0	0.00908013	0.219935	0.31728	0.0422913
ENSG00000006125	AP2B1	0.254927	0.250113	0.361287	0.227996	0.331855	0	0.320435	0.307105	0.1432	0.124564	0.278297	0.17859	0	0.366989	0.345959	0.391154	0.198501	0.359642	0.411996	0.379636	0.385714	0.408203
ENSG00000101811	CSTF2	0.254869	0.357603	0.552769	0.645327	0.25069	0.222923	0.328127	0.616529	0.347544	0.407644	0.403177	0.275299	0.507383	0.402307	0.34999	0.33887	0	0.243329	0.0900158	0.342831	0.38389	0.239017
ENSG00000164983	TMEM65	0.254805	0.0626894	0.256103	0.229712	0.262751	0.406759	0.33829	0.212958	0.198908	0.0485089	0.119715	0	0	0.299737	0.0411699	0.0491298	0	0.0107955	0	0	0.515964	0.430522
ENSG00000084693	AGBL5	0.254781	0.126267	0.153812	0.0374805	0	0	0.106918	0.103626	0.00168797	0.137009	0.272251	0	0	0.324365	0.184331	0	0	0	0	0	0.0705063	0.0452443
ENSG00000087191	PSMC5	0.254774	0.367991	0.31075	0.200114	0.362199	0	0.241611	0.372547	0.372532	0.330795	0.375084	0.255131	0.136765	0.351607	0.384276	0.186518	0.191538	0.125155	0.224625	0.186032	0.324974	0.373211
ENSG00000112964	GHR	0.254608	0	0	0.182802	0	0	0	0	0	0	0	0	0	0	0	0	0	0	0	0	0	0
ENSG00000165997	ARL5B	0.254401	0.0545417	0.00891024	0.535813	0	0.144615	0.50872	0	0	0.0767608	0.00178504	0	0	0.150151	0	0	0	0.289696	0.233072	0.0371955	0.0151274	0
ENSG00000138660	AP1AR	0.254282	0.164506	0.211728	0.292185	0.154376	0	0	0.365857	0.395519	0.393094	0.376714	0.377344	0.0299465	0.174515	0.250895	0.383608	0.179769	0.32	0.389652	0.165778	0.345747	0.072417
ENSG00000169891	REPS2	0.254246	0.272043	0.368712	0	0.0683792	0	0	0.253757	0.149481	0.401904	0	0	0.158021	0.516766	0.192897	0.527881	0.393187	0.59753	0.643339	0.588519	0.271834	0.568443
ENSG00000070882	OSBPL3	0.253955	0	0	0.0189039	0	0	0	0	0	0	0	0	0	0	0	0	0	0	0	0.558924	0	0.241508
ENSG00000048740	CELF2	0.253684	0	0	0.203	0.125568	0.191548	0	0	0.227422	0.311104	0	0	0.28994	0	0	0.522577	0.329545	0.371891	0.461288	0.461385	0	0
ENSG00000135829	DHX9	0.253642	0.299268	0.319013	0.32	0.00621387	0	0.122515	0.172443	0.130682	0.0586754	0.304998	0	0	0.334452	0.220838	0.296981	0.170595	0.0202479	0.250244	0.145427	0.144439	0.111179
ENSG00000156050	FAM161B	0.253454	0.00131234	0	0.111519	0	0	0	0.194609	0.251721	0.252962	5.52975e-05	0.220417	0.380954	0.138245	0.0979413	0.193582	0	0	0	0.1569	0.285309	0.283522
ENSG00000163932	PRKCD	0.253226	0	0	0	0.231163	0	0	0	0	0	0	0	0	0	0	0	0	0	0.238683	0	0	0
ENSG00000183020	AP2A2	0.253165	0.253532	0.103191	0.309131	0.390707	0.129731	0.400786	0.186743	0.323054	0.244796	0.307333	0.17635	0.0527406	0.23938	0.242392	0.379928	0.310556	0.410136	0.448834	0.114654	0.20857	0.43373
ENSG00000103460	TOX3	0.252909	0	0.0694223	0.242639	0	0.636321	0.282288	0	0.401351	0.512301	0.152022	0.272898	0.211212	0.1637	0.348985	0.795986	0.395108	0.143516	0	0	0	0
ENSG00000105568	PPP2R1A	0.252711	0.169327	0.350117	0.146835	0.336963	0.151808	0.192068	0.201496	0.167706	0.205566	0.183905	0	0.114639	0.336653	0.262931	0.269838	0.192803	0.158729	0.316939	0.187109	0.262024	0.267316
ENSG00000197362	ZNF786	0.252516	0.313868	0	0	0.0524085	0	0	0.47441	0	0.0265873	0.0952223	0	0	0	0	0	0	0.102219	0.103378	0.0140041	0.0630856	0.0075069
ENSG00000164076	CAMKV	0.25224	0.0437462	0	0	0	0	0	0.136317	0.507069	0.409579	0.333302	0.328487	0.400428	0	0	0.682273	0.626708	0.579428	0.724567	0.626207	0	0.0532609
ENSG00000203666	EFCAB2	0.252082	0.358616	0.388861	0.369712	0.20623	0	0.260047	0.308124	0.253748	0.0147657	0.328539	0.371337	0	0.382981	0.411036	0.131596	0	0.250177	0.0309832	0.141525	0.432147	0.344613
ENSG00000164068	RNF123	0.251745	0.218112	0.249331	0.300051	0.294869	0	0	0.288274	0	0	0	0.0395444	0.033623	0.275211	0	0.0629521	0	0.020671	0.128314	0.198044	0.130412	0.256784
ENSG00000113580	NR3C1	0.251726	0	0	0	0	0	0.557931	0	0	0	0	0	0	0	0	0.00616048	0.0901357	0	0	0.358128	0	0
ENSG00000157764	BRAF	0.251542	0.194116	0.255253	0.476037	0.136527	0	0.306227	0.360471	0.249866	0.35635	0.342683	0.0357691	0.119051	0.268209	0.296627	0.40515	0.271909	0.386341	0.537458	0.41501	0.268051	0.37961
ENSG00000179912	R3HDM2	0.251448	0.0515256	0.226297	0.277985	0.478682	0	0.326014	0.029145	0.0303088	0	0.0598929	0	0.0393717	0.348996	0.20435	0.383792	0.210286	0.442552	0.117469	0.556229	0	0.0741474
ENSG00000108061	SHOC2	0.250993	0.318625	0.271074	0.341302	0.219691	0	0.356011	0.322944	0.00148667	0.0486541	0.306639	0.148449	0	0.244221	0.246443	0.389973	0.158556	0.32177	0.430603	0.324319	0.36521	0.414816
ENSG00000084764	MAPRE3	0.250624	0.301851	0.343655	0.35432	0.319024	0.249139	0.373832	0.376621	0.344801	0.379285	0.359358	0.306659	0.171591	0.421047	0.383531	0.339358	0.241587	0.301862	0.309758	0.328977	0.313728	0.370416
ENSG00000197102	DYNC1H1	0.25035	0.288192	0.253472	0.252873	0.303151	0	0.193642	0.29189	0.115576	0.18953	0.141676	0.0794088	0.155147	0.33324	0.28624	0.332953	0.194527	0.221682	0.326794	0.371792	0.249485	0.144304
ENSG00000196235	SUPT5H	0.250167	0.11125	0.182402	0.210614	0.319275	0.162019	0.317181	0.262269	0.144873	0.171919	0.217283	0.0806885	0	0.333942	0.305948	0.239787	0.103472	0.298091	0.270346	0.340719	0.147559	0.227706
ENSG00000134287	ARF3	0.24988	0.283772	0.300392	0.325235	0.330407	0.143608	0.315245	0.305351	0.343597	0.323951	0.342354	0.204633	0.220989	0.321608	0.340979	0.516718	0.337918	0.387544	0.523802	0.45444	0.342412	0.370879
ENSG00000074755	ZZEF1	0.249803	0.00313195	0.202227	0.330749	0.267221	0.0835183	0.448236	0.268752	0.0358719	0.061677	0.236496	0.0282826	0.185804	0.222303	0.225392	0.0783078	0.0988531	0.234551	0.266805	0.344802	0.16259	0.290626
ENSG00000129625	REEP5	0.249659	0.126945	0.154973	0.170086	0.20539	0.151388	0.20861	0.123181	0.153319	0.146011	0.0545847	0.101229	0	0.120259	0.166915	0.158401	0	0.165289	0.261162	0.230881	0.18405	0.162801
ENSG00000213190	MLLT11	0.249352	0.383214	0.324099	0.241426	0.300924	0.0803196	0.22583	0.332411	0.429234	0.404682	0.384469	0.335287	0.299822	0.34257	0.368791	0.40064	0.3205	0.330414	0.401988	0.287582	0.369767	0.373892
ENSG00000068354	TBC1D25	0.249349	0	0	0.00793419	0.0842967	0	0.355789	0	0	0.149017	0	0	0.223332	0	0	0.141438	0.422811	0	0.123966	0.016797	0.200301	0.0145269
ENSG00000001497	LAS1L	0.249254	0.28793	0.288268	0.212348	0.192064	0.246179	0.210521	0.2946	0.315144	0.155964	0.152232	0.301753	0.117653	0.331065	0.242526	0.183948	0	0	0.0372871	0.195754	0.284527	0.237767
ENSG00000129245	FXR2	0.249227	0.28626	0.292244	0.274276	0.247143	0	0.329921	0.342812	0.0899194	0	0.201885	0.121961	0	0.384445	0.299545	0.18875	0.098132	0.0502583	0.241155	0.263468	0.262398	0.286512
ENSG00000179915	NRXN1	0.249225	0.317224	0.231415	0.283666	0.235251	0.0991379	0	0.313854	0.371068	0.424265	0.340338	0.266483	0.291175	0.227642	0.192347	0.525759	0.329719	0.296512	0.526147	0.436579	0.189832	0.354463
ENSG00000173566	NA	0.249052	0.131545	0.175161	0.0101602	0.173594	0	0.278652	0.0824034	0.32291	0.278073	0.176023	0	0.00989305	0.118751	0.385507	0.0364623	0.00143711	0.103392	0.279353	0.339683	0.237604	0.252601
ENSG00000185621	LMLN	0.248859	0.466921	0.472247	0.312819	0.347256	0.152135	0	0.41335	0.0635656	0.0661558	0.283646	0.0234221	0.178126	0.341247	0.235697	0.262444	0.186239	0	0.341297	0.0855978	0.371275	0.109622
ENSG00000100764	PSMC1	0.248761	0.279691	0.27382	0.059789	0.290777	0	0.070695	0.219952	0.195902	0.161272	0.307312	0.219536	0.105548	0.31701	0.334449	0.117947	0.155266	0.0256198	0.202055	0	0.243703	0.327998
ENSG00000158526	TSR2	0.248705	0.382781	0.384586	0.332597	0.189439	0	0.433463	0.416982	0.505389	0.414494	0.46378	0.425656	0.32072	0.397832	0.49325	0.36862	0.217181	0.306609	0.328909	0.204685	0.370816	0.346725
ENSG00000182177	ASB18	0.247994	0	0	0.0163551	0.0114162	0	0	0.00237295	0	0.934826	0.30727	0	0.823375	0	0.245112	0.270744	0.316327	0	0.612392	0	0.799093	0
ENSG00000115504	EHBP1	0.24798	0.362848	0.459947	0.217807	0.014499	0.367729	0.261689	0.260964	0.121966	0.12034	0.352128	0.147818	0.192697	0.40252	0.383969	0.324497	0.0621896	0.0616022	0.322014	0.33991	0.317833	0.267341
ENSG00000105784	RUNDC3B	0.247911	0.469274	0.450648	0.38225	0	0.081308	0.376698	0.54116	0.528222	0.338848	0.522119	0.239772	0.334012	0.521407	0.577111	0.518083	0.342034	0.281294	0.48255	0.293778	0.448844	0.0640569
ENSG00000087258	GNAO1	0.247392	0.224604	0.286671	0.257666	0.20985	0.0919891	0.268235	0.25532	0.232178	0.28964	0.248035	0.17539	0.127607	0.290554	0.30106	0.346937	0.215854	0.334374	0.387665	0.332208	0.277588	0.478999
ENSG00000196850	PPTC7	0.247319	0.473952	0.652083	0.551552	0.337024	0.0996636	0.345683	0.620873	0.197557	0.170972	0.397168	0.15351	0.275596	0.634745	0.600333	0.140307	0.229539	0.165078	0.340644	0.352992	0.499017	0.0952255
ENSG00000117069	ST6GALNAC5	0.247314	0.0460699	0	0.0145076	0.559815	0	0	0.0154931	0	0	0	0.077937	0	0	0.0253353	0.542678	0.624337	0.757433	0.822164	0.698371	0.277786	0.924667
ENSG00000179715	PCED1B	0.247232	0.105104	0.154614	0.187693	0	0	0.153004	0.105992	0.109098	0.211197	0.267919	0	0.10494	0.104469	0.26709	0	0	0	0.226937	0	0.0396614	0
ENSG00000206418	RAB12	0.247127	0.00151546	0.242953	0.23441	0.294498	0	0.319189	0.309612	0.0268559	0.102312	0.252547	0	0	0.293683	0.323281	0.44814	0.060991	0.343669	0.329032	0.280571	0.284533	0.318019
ENSG00000155961	RAB39B	0.246893	0.113889	0.0831702	0.184283	0	0.0617754	0.35884	0.139387	0.018943	0.0833239	0.0486659	0	0	0.080885	0.127599	0.271713	0.281493	0.166763	0.24776	0.124609	0.199311	0.289575
ENSG00000149929	HIRIP3	0.246796	0.142177	0.0361114	0.169097	0.284755	0	0.175111	0.0843032	0.188415	0.150362	0.463349	0.186458	0.0261364	0.137853	0.0869314	0.27347	0	0	0.0301839	0.283797	0.0412401	0.00405778
ENSG00000078124	ACER3	0.24674	0.0554671	0.431034	0.284346	0	0.0488764	0.293531	0.0354058	0	0.0562967	0.0943212	0.22715	0	0.190522	0.220923	0	0	0	0	0.0165177	0.0136235	0.0650936
ENSG00000127311	HELB	0.246738	0	0	0	0	0	0	0	0	0	0	0	0	0	0	0	0	0.0755411	0	0	0	0
ENSG00000173221	GLRX	0.246667	0.365765	0.520148	0.185846	0.446998	0	0.115128	0.414327	0.185022	0.266421	0.294856	0.354938	0.0207888	0.58866	0.394172	0.16276	0	0.209925	0.338714	0.28853	0.394329	0.511409
ENSG00000175073	VCPIP1	0.246645	0.34218	0.33799	0.535313	0.15383	0.303434	0.399005	0.226841	0	0.326141	0.264297	0.111659	0.0578209	0.352693	0.29561	0.261056	0.098338	0.233183	0.324829	0.302629	0.300217	0.35376
ENSG00000164091	WDR82	0.246624	0.390391	0.458262	0.364112	0.336499	0	0.271953	0.361884	0.37979	0.307184	0.250884	0.258953	0.22007	0.377967	0.377782	0.277396	0.209305	0.19861	0.377112	0.334683	0.393474	0.205363
ENSG00000165813	CCDC186	0.246422	0.26548	0.0343814	0.298889	0.35035	0	0.205676	0.230399	0.0710723	0.342382	0.26673	0.046647	0.0675134	0.310024	0.127603	0.0833172	0	0.335365	0.226001	0.163817	0.239088	0.204539
ENSG00000130830	MPP1	0.246109	0.0222267	0.0860186	0.196526	0	0.16468	0.0817749	0.0123047	0	0.0135762	0	0	0	0.198814	0.00250614	0	0	0	0.0127686	0	0.019816	0
ENSG00000082293	COL19A1	0.246049	0	0	0	0	0	0	0	0	0	0	0	0	0.320566	0	0	0	0	0	0	0	0.969751
ENSG00000196781	TLE1	0.24602	0	0	0	0	0	0	0	0	0	0	0	0	0	0	0	0	0	0	0	0	0
ENSG00000168434	COG7	0.246003	0.0440493	0.0402088	0.0328447	0	0	0	0	0	0.0243029	0.0547653	0.0036473	0.0549465	0.0872536	0	0.213272	0.288955	0.0639291	0.204111	0.289266	0.0197275	0.115164
ENSG00000126217	MCF2L	0.245968	0.185607	0.305729	0.287027	0.214486	0.00410008	0.301812	0.367881	0.349944	0.32857	0.286473	0.241595	0.150602	0.358265	0.371209	0.399528	0.380647	0.340853	0.398648	0.363041	0.367482	0.267637
ENSG00000133246	PRAM1	0.245939	0	0	0	0.0851638	0	0	0	0	0.0781179	0	0	0	0	0	0	0	0	0	0	0	0
ENSG00000168291	PDHB	0.245935	0.292559	0.336632	0.282794	0.344004	0.352788	0.161438	0.29144	0.0878573	0.168774	0.156017	0.13623	0.0531417	0.394645	0.247144	0.158187	0.0623132	0	0.119666	0.170698	0.357619	0.274715
ENSG00000157870	FAM213B	0.245905	0.322927	0.31922	0.171723	0.399333	0	0.231396	0.320943	0.357179	0.237619	0.426566	0.387961	0.0177807	0.356183	0.422242	0.254883	0.292941	0.242478	0.369957	0.239868	0.307818	0.41916
ENSG00000138101	DTNB	0.245546	0.0328349	0.156357	0	0.389916	0.119855	0	0.230093	0.140462	0.00605151	0.235405	0	0.018115	0.0882425	0.271937	0.403375	0.420181	0.424213	0.249517	0.188617	0.233325	0.558025
ENSG00000164211	STARD4	0.245494	0	0.0546744	0.481006	0.327876	0	0.373038	0	0	0	0.320204	0	0	0.228359	0.337137	0	0	0.186214	0.00364292	0	0	0
ENSG00000037474	NSUN2	0.245417	0.204684	0.230291	0.0254494	0.229105	0	0.294473	0.355731	0.294861	0	0.302362	0.19237	0	0.21696	0.238513	0.213258	0.0735801	0	0.328952	0.182582	0.236964	0.075571
ENSG00000198925	ATG9A	0.245409	0.162714	0.225907	0.308493	0.317171	0.304542	0.193409	0.425159	0.162018	0.150041	0.230452	0.12644	0.343628	0.389511	0.295064	0.327998	0.145167	0.29972	0.371688	0.49804	0.200105	0.294001
ENSG00000112234	FBXL4	0.245193	0.245528	0.195784	0.21956	0	0.109101	0.341496	0.303289	0	0	0.305112	0.32057	0	0.2556	0.170681	0	0	0	0	0.0437144	0.0941158	0
ENSG00000170153	RNF150	0.244791	0	0	0.0376201	0	0	0.454757	0.0423595	0	0.164743	0	0.0397364	0.0182487	0.149169	0.123608	0.601537	0.326252	0.514552	0.520198	0.710374	0.0702922	0.0190716
ENSG00000167536	DHRS13	0.244396	0.341444	0.389365	0.252295	0.101586	0	0.150876	0.10932	0.333571	0.142286	0.289597	0.422249	0.149202	0.336549	0.36349	0	0	0	0	0	0.382087	0.148077
ENSG00000110917	MLEC	0.244071	0.0229844	0.130475	0.188447	0	0	0.221914	0.161612	0	0	0.0677847	0	0.052139	0.105721	0.236668	0.0322655	0	0.0443182	0.348334	0.158481	0.276148	0.316874
ENSG00000198843	SELENOT	0.244062	0.222768	0.280936	0.099111	0.135998	0.144659	0.180331	0.216715	0.0395646	0.0764911	0.0570744	0	0	0.271972	0.228887	0.247448	0.0308117	0.125568	0.226338	0.266225	0.274305	0.300463
ENSG00000185527	PDE6G	0.244051	0.38571	0.0376763	0.0730627	0	0	0	0	0	0	0	0.286825	0	0	0	0	0	0	0	0	0	0
ENSG00000142655	PEX14	0.243947	0.0253081	0.0953931	0.0219324	0.229021	0	0.0668057	0.204457	0.292346	0.233224	0.185716	0.219545	0	0.292505	0.189055	0.153186	0	0	0.102933	0.322839	0.123945	0
ENSG00000091129	NRCAM	0.243898	0	0.0536481	0.164377	0	0	0	0.0293695	0	0	0	0	0	0.0207917	0	0.627364	0.376419	0.532865	0.506526	0.803465	0.0265393	0.292477
ENSG00000169193	CCDC126	0.243836	0.114785	0.120394	0	0.115661	0	0.0784032	0	0.000287742	0.0918684	0	0	0	0.0364742	0	0	0.00103184	0	0	0.163873	0	0
ENSG00000135127	BICDL1	0.243735	0.303348	0.20568	0.141958	0.0828868	0	0.316179	0.244402	0.0848668	0.0196069	0.280786	0	0	0.272378	0.279977	0.26191	0	0.303011	0.320785	0.317306	0.341754	0.0195179
ENSG00000162298	SYVN1	0.24365	0	0.189862	0.275384	0.0906102	0	0.0651777	0.217593	0	0	0.118546	0	0	0.16411	0.100287	0.223851	0	0.0906828	0.166899	0.326295	0.0814204	0.0972004
ENSG00000139597	N4BP2L1	0.243624	0.380611	0.251646	0.186059	0.243837	0	0.419658	0.365579	0.521797	0.371354	0.395497	0.351209	0.299475	0.27771	0.350367	0.145829	0.158118	0.363998	0.290475	0.23964	0.405588	0.213761
ENSG00000078018	MAP2	0.243602	0.286114	0.342243	0.358264	0.313827	0.0399495	0.3397	0.351953	0.377574	0.3821	0.281092	0.184861	0.26147	0.34934	0.354659	0.447384	0.366795	0.379752	0.369147	0.384412	0.377355	0.399468
ENSG00000167770	OTUB1	0.243502	0.236075	0.402801	0.559135	0.378039	0.135563	0.398267	0.396289	0.37726	0.360556	0.404758	0.32876	0.179902	0.510692	0.372913	0.298127	0.123247	0.263061	0.397188	0.275077	0.28651	0.30739
ENSG00000188739	RBM34	0.243456	0.0338452	0.0399328	0.0565314	0.120945	0	0.136958	0.210819	0.153201	0.0158792	0.0113679	0.0438316	0	0.0912076	0.217678	0.102315	0	0	0.0699733	0	0.0813311	0.30366
ENSG00000037637	FBXO42	0.243247	0.0473724	0.2449	0	0.137735	0	0.25822	0	0.17164	0	0.234245	0.0152291	0.128133	0.253878	0.212825	0.34742	0	0.258715	0.221542	0.341056	0.265698	0.145191
ENSG00000146676	PURB	0.243079	0.337894	0.350077	0.335892	0.304538	0.202902	0.185254	0.299201	0.310051	0.344838	0.267905	0.192219	0.250025	0.361055	0.377451	0.364303	0.208554	0.302553	0.355794	0.293063	0.364726	0.399375
ENSG00000158445	KCNB1	0.242935	0.305836	0.322727	0.32241	0.114344	0.408634	0.108814	0.280632	0.0437848	0.183252	0.199836	0	0.309943	0.284508	0.288137	0.558074	0.107036	0.497961	0.354393	0.781167	0.270623	0.426173
ENSG00000204104	TRAF3IP1	0.242851	0.261549	0.25428	0.173275	0.21326	0	0.186636	0.357684	0.0471545	0.241756	0.209762	0	0.510953	0.572003	0.481113	0.00693356	0	0	0.0540918	0.10591	0.152577	0.248073
ENSG00000084112	SSH1	0.242788	0.127617	0.33507	0.0792481	0.0276012	0	0.256026	0.279449	0	0	0.108565	0.243523	0	0.369158	0.224918	0	0	0.0543585	0.186951	0.0304873	0.335317	0.351528
ENSG00000144362	PHOSPHO2	0.242756	0.0466256	0.279132	0.0507833	0.243262	0	0	0.267097	0.0365912	0	0.0995026	0.0403123	0.0856283	0.37414	0.215776	0.171794	0	0.200954	0.250068	0.210999	0.336029	0.26478
ENSG00000213023	SYT3	0.242724	0.433004	0.798798	0.572363	0.412218	0.498687	0.283784	0.64612	0.299153	0.42011	0.417077	0.370333	0.555139	0.720474	0.554825	0.170326	0.00678317	0.226016	0.505555	0.525184	0.594588	0.556273
ENSG00000112379	ARFGEF3	0.24221	0.299367	0.371447	0.471272	0.157615	0.0207865	0.444695	0.365367	0.171094	0.186793	0.364978	0.0613002	0.368096	0.435325	0.393519	0.372292	0.28156	0.385082	0.416644	0.305431	0.386234	0.41921
ENSG00000089248	ERP29	0.24194	0.172515	0.175532	0.15336	0.15583	0.0425778	0.234402	0.0529459	0.145646	0	0.266303	0.130023	0	0.103002	0.302825	0.0202526	0.0354104	0.00650826	0.0957068	0.215671	0.139375	0.123478
ENSG00000135482	ZC3H10	0.241715	0.204002	0.0388759	0	0.23051	0	0.192697	0.21489	0	0	0	0.0677352	0	0.282424	0.230069	0	0	0	0	0	0	0
ENSG00000105321	CCDC9	0.241655	0.456179	0.565069	0.293349	0.280125	0.577209	0	0.528888	0.321581	0.0808817	0.325766	0.31158	0	0.370532	0.482478	0.242635	0.362876	0.172228	0.207829	0.29495	0.233879	0.303621
ENSG00000149269	PAK1	0.241546	0.309318	0.335992	0.283151	0.571006	0.168209	0.233319	0.340967	0.414725	0.598288	0.321986	0.235818	0.346336	0.357997	0.309744	0.396752	0.161704	0.34876	0.364017	0.443105	0.286828	0.00455914
ENSG00000095787	WAC	0.241369	0	0.219138	0.419756	0	0	0.363012	0.145732	0.191638	0.0378582	0.0998332	0	0	0.0909216	0.110667	0.150634	0.00327662	0.0468492	0.10437	0.158391	0.0816967	0.26909
ENSG00000128833	MYO5C	0.241228	0	0	0	0.584798	0	0.0791914	0	0	0	0	0	0.868821	0	0	0.157771	0.263137	0.350243	0	0.852187	0	0
ENSG00000009724	MASP2	0.240999	0	0	0	0.0973025	0.401456	0.0254544	0	0	0	0.0881007	0	0	0	0	0.0235036	0	0	0.0197969	0.125731	0.0434616	0
ENSG00000172058	SERF1A	0.240941	0.26377	0.112568	0	0.328189	0	0	0.00314352	0.350966	0.314071	0.17166	0.181341	0	0	0.176956	0.324067	0.1755	0.269424	0.339712	0	0.144506	0.363384
ENSG00000264364	DYNLL2	0.240698	0.383841	0.367622	0.292165	0.298964	0.218881	0.23112	0.349581	0.378769	0.367635	0.364316	0.304902	0.279435	0.371521	0.368601	0.270449	0.15722	0.210795	0.281557	0.211189	0.367759	0.334613
ENSG00000110171	TRIM3	0.240417	0.281198	0.452485	0.183023	0.444562	0	0.300609	0.355165	0	0.134897	0.219427	0.152816	0	0.309425	0.344401	0.323885	0.228819	0.311784	0.343789	0.412603	0.353283	0.236087
ENSG00000110881	ASIC1	0.240374	0.44145	0.46316	0.424792	0	0.526774	0.194493	0.575116	0.359905	0.406627	0.452069	0.405789	0.108054	0.647928	0.63611	0.282238	0.372338	0.278928	0	0.380053	0.547154	0.506086
ENSG00000111785	RIC8B	0.240224	0	0.494164	0.196809	0.212057	0	0.377983	0.35887	0.012277	0.186159	0.224688	0.00755055	0.152493	0.338012	0.495644	0.0318895	0	0.0614497	0	0.0822968	0.387509	0.38261
ENSG00000050344	NFE2L3	0.240198	0	0	0	0	0	0	0	0	0	0	0	0	0	0	0	0	0	0	0.040633	0	0
ENSG00000196405	EVL	0.240009	0.369449	0.32104	0.19793	0.329926	0.00567704	0.134377	0.287763	0.402593	0.399593	0.341885	0.225154	0.140775	0.311971	0.322981	0.379418	0.185993	0.239404	0.321375	0.191029	0.395119	0.372001
ENSG00000143850	PLEKHA6	0.239772	0.461048	0.598845	0.425822	0.481352	0.316957	0.335219	0.614967	0.438646	0.475421	0.412221	0.448554	0.423064	0.620575	0.430063	0.149089	0.0308692	0.433422	0.195526	0.417131	0.440469	0.0492006
ENSG00000101236	RNF24	0.239762	0	0.394224	0.0304074	0.192177	0.0107865	0.104748	0.29738	0.228058	0.292479	0.0107572	0.106032	0	0.280155	0	0.302612	0.0466737	0	0.191814	0.304729	0.265358	0.130411
ENSG00000102109	PCSK1N	0.239697	0.332679	0.294515	0.223476	0.277461	0.203848	0.187293	0.306172	0.376584	0.344691	0.313614	0.289034	0.270269	0.320662	0.295735	0.337576	0.235112	0.209194	0.277388	0.278658	0.299782	0.297687
ENSG00000162512	SDC3	0.239692	0.108709	0.105491	0.114459	0.4763	0	0.174065	0	0.248646	0.124141	0.0363115	0	0	0.0502745	0.172883	0.464115	0.34629	0.393772	0.387195	0.12621	0.141602	0.00115085
ENSG00000134324	LPIN1	0.239384	0.127601	0.369929	0.426134	0.367456	0	0.541499	0.438709	0.16612	0	0.392588	0	0	0.393529	0.386718	0	0	0	0	0	0.398755	0.306464
ENSG00000108799	EZH1	0.239361	0.0311679	0.318225	0.40136	0.352008	0.250537	0.180807	0.224163	0.294169	0.143897	0.299145	0.0409521	0	0.257004	0.301505	0	0.0441699	0.251085	0.295598	0.218807	0.188353	0.341982
ENSG00000101337	TM9SF4	0.239259	0.118096	0.336809	0.0361958	0.254343	0.0671783	0.218228	0.371034	0.0786029	0.119289	0.345796	0.114218	0.264488	0.360386	0.361434	0.283569	0	0.259657	0.113572	0.471051	0.23464	0.337964
ENSG00000146416	AIG1	0.239251	0	0.0997854	0	0.311248	0	0.0927579	0	0.0125168	0	0	0	0	0.0695692	0.0455477	0	0	0	0.139768	0.192127	0.0475053	0
ENSG00000127663	KDM4B	0.239173	0.0468276	0	0	0.151889	0	0	0.00251482	0	0.187644	0	0	0	0.0657025	0	0.233301	0	0.242122	0.426508	0.363751	0.10332	0
ENSG00000138031	ADCY3	0.239077	0.482236	0.401268	0.352675	0.0996869	0.209471	0.323188	0.5258	0.226228	0.266489	0.423822	0.283825	0.301147	0.402889	0.381357	0.207092	0.221637	0.325945	0.371359	0.613488	0.353269	0.299211
ENSG00000213088	ACKR1	0.238892	0.0426349	0.346515	0.564486	0.408597	0.307683	0.234505	0.413491	0	0.246483	0.407473	0.173463	0	0.41856	0.514014	0.727824	0.0328236	0.483276	0.573123	0.350844	0.301517	0.329629
ENSG00000145451	GLRA3	0.238787	0.71283	0.10803	0.878779	0	0	0.344621	0.820664	0.980646	0.190305	0.974045	0.4936	0.61623	0.185264	0.42426	0.7207	0	0	0	0.172883	0.0330601	0
ENSG00000164961	WASHC5	0.238369	0	0	0.311405	0	0.0746067	0.435733	0	0	0	0	0	0	0.0894726	0	0.0941824	0	0.234507	0	0.14478	0	0.147007
ENSG00000120265	PCMT1	0.238112	0.220004	0.262874	0.215817	0.257932	0	0.172391	0.257206	0.336332	0.263671	0.31233	0.155874	0.12881	0.247427	0.221603	0.242772	0.128075	0.233624	0.249392	0.251951	0.212964	0.145518
ENSG00000182667	NTM	0.238035	0.429759	0.366627	0.149306	0.19371	0.118482	0.14603	0.338562	0.128429	0.29702	0.252027	0.204974	0.353201	0.355556	0.347574	0.40861	0.296712	0.360987	0	0.585707	0.272186	0.411969
ENSG00000070718	AP3M2	0.237873	0.327266	0.354894	0.239303	0.365189	0.194533	0.234035	0.32506	0.352527	0.369941	0.30792	0.117574	0.228672	0.389959	0.355269	0.441258	0.224159	0.497973	0.616908	0.441441	0.371417	0.3143
ENSG00000127980	PEX1	0.237841	0.0295514	0.0609077	0.321964	0.236119	0	0.113068	0.263843	0.0231632	0.118487	0.0103814	0	0.237065	0.141997	0.127918	0	0	0.130126	0	0.185901	0	0.291562
ENSG00000103064	SLC7A6	0.237656	0.101021	0.275328	0.0994578	0	0	0.0510015	0.311495	0	0	0.00361706	0	0	0.31294	0.355427	0.286058	0	0	0.233962	0.307297	0.320119	0.287737
ENSG00000147180	ZNF711	0.237387	0.399834	0.520605	0.599628	0.225212	0	0.31159	0.204823	0.14372	0.388207	0.327355	0	0	0.313913	0.567944	0.26424	0.0747347	0.371101	0.17436	0.361335	0.430713	0.432536
ENSG00000166821	PEX11A	0.237217	0	0	0	0.236498	0.0652809	0	0	0	0	0	0	0	0	0	0	0.0263119	0	0.439069	0	0	0.24909
ENSG00000171204	TMEM126B	0.237133	0.32151	0.268252	0	0	0.128906	0.289648	0.221189	0.297746	0.30443	0.36202	0.101078	0.00227273	0.262195	0.268303	0.0373339	0	0	0.113864	0.0390784	0.37879	0.305648
ENSG00000135116	HRK	0.237101	0	0	0	0.489211	0	0	0	0.493028	0	0.27207	0	0	0	0	0.958899	0.931195	0.884454	0.898016	0.860809	0	0
ENSG00000100151	PICK1	0.237091	0.224191	0.26931	0.150404	0.1081	0	0	0.234323	0.0137157	0.360629	0.15069	0.0864474	0	0.218277	0.209133	0.152427	0.0190274	0	0.0954506	0.242952	0.258276	0.320624
ENSG00000128872	TMOD2	0.236959	0.186401	0.179028	0.214374	0.186623	0	0.163278	0.256186	0.209263	0.310713	0.207701	0.100269	0.176604	0.233987	0.259528	0.348996	0.217521	0.321761	0.380395	0.333649	0.207457	0.277954
ENSG00000090432	MUL1	0.236912	0.286763	0.292542	0.0995096	0.239053	0.0103371	0.12317	0.295931	0.11034	0.331943	0.314416	0.125264	0.0721257	0.402663	0.305794	0.0981911	0	0	0.197931	0.332604	0.226406	0.25426
ENSG00000089639	GMIP	0.23686	0.0896063	0	0.0931835	0	0	0.19418	0.0963563	0	0.136889	0.431833	0.173969	0	0	0	0	0.185872	0.0260823	0	0.0859524	0	0.0942512
ENSG00000112902	SEMA5A	0.236817	0	0	0.60171	0	0	0.032503	0	0	0	0	0	0	0.114785	0	0	0	0	0.280636	0	0	0
ENSG00000116497	S100PBP	0.236676	0	0.239321	0.532588	0.0434971	0	0.604865	0.186516	0.204178	0.0711509	0.406861	0.31169	0.138097	0.188146	0.438018	0.0524481	0	0	0.128006	0.0631492	0.35979	0.130411
ENSG00000205593	DENND6B	0.236629	0.393826	0.31887	0.287308	0.239875	0.367808	0.161048	0.556097	0.483162	0.553492	0.384888	0.512549	0.362109	0.40869	0.388233	0.294478	0	0	0.0382925	0.365196	0.369722	0.337925
ENSG00000047315	POLR2B	0.236334	0.146083	0.3198	0	0.237562	0	0.0408476	0.120351	0.0360637	0	0.0078448	0.0997609	0.0694519	0.225139	0.0449454	0.088408	0	0.120186	0.15532	0.123046	0.349773	0.160016
ENSG00000141699	RETREG3	0.23627	0.156914	0.191754	0	0.210118	0	0.0386908	0.126397	0	0.0422637	0	0	0	0.233078	0.144623	0.0704645	0	0	0.253811	0.172473	0.0420205	0.24386
ENSG00000125851	PCSK2	0.236044	0.338022	0.0476302	0.417974	0.389459	0.378478	0.386141	0.450287	0.439979	0.525307	0.43388	0.154274	0.522546	0.0697771	0	0.428823	0.368352	0.41144	0.449473	0.560491	0	0.423335
ENSG00000047849	MAP4	0.235818	0.270334	0.273794	0.377665	0.339943	0.232286	0.391491	0.267962	0.172865	0.321025	0.207879	0.176286	0	0.362527	0.337948	0.0416217	0	0.262724	0.316676	0.198746	0.287131	0.392651
ENSG00000148200	NR6A1	0.235754	0	0.260199	0.0038454	0.0873314	0.131236	0.315445	0.180862	0	0	0	0	0.20051	0.288535	0	0.387137	0.347676	0.336858	0.150103	0.287711	0.0297049	0
ENSG00000105649	RAB3A	0.235308	0.395544	0.383903	0.280344	0.344822	0.211522	0.209647	0.367712	0.378571	0.392071	0.328709	0.299311	0.285774	0.401653	0.383463	0.385454	0.312217	0.301409	0.371103	0.37193	0.381605	0.367123
ENSG00000160216	AGPAT3	0.235302	0.058042	0.231072	0	0.210378	0	0	0.309315	0	0	0	0.00582288	0.247102	0.285438	0.046386	0.225092	0	0.0409091	0.185493	0.236344	0.168425	0.0437323
ENSG00000141564	RPTOR	0.235155	0.359763	0.425482	0.146334	0.361936	0	0.286677	0.359072	0.0672358	0.238478	0.301098	0	0.282772	0.480305	0.385475	0.251366	0.0280524	0.303402	0.326825	0.407826	0.30118	0.30256
ENSG00000196547	MAN2A2	0.235062	0.252328	0.262162	0.29677	0	0.0736964	0.196227	0.334547	0.285675	0.154941	0.239204	0.189145	0.258164	0.322199	0.18652	0.307579	0.0261554	0.0488636	0.256847	0.330764	0.242892	0.179892
ENSG00000165966	PDZRN4	0.235043	0.314288	0.294755	0.532377	0	0	0	0.347697	0.557095	0.768932	0.234298	0.395336	0	0.267165	0.129431	0.734083	0.745274	0.107108	0	0.406922	0.264817	0.522329
ENSG00000085832	EPS15	0.235027	0.0325318	0.035641	0.206872	0.0324246	0	0.26706	0.038845	0	0.0873838	0	0	0	0.0927312	0.0474572	0	0	0.072469	0.237199	0	0	0.328239
ENSG00000065833	ME1	0.235015	0	0	0	0	0	0.271129	0	0	0	0	0	0	0	0	0	0.0494941	0.262436	0.583856	0	0	0
ENSG00000149532	CPSF7	0.234864	0.180921	0.186039	0.11635	0.121582	0	0.272601	0.198806	0.11599	0.315587	0.108405	0.0463911	0.285161	0.319999	0.27884	0.165045	0.0274201	0.226026	0.239738	0.194975	0.130293	0.229611
ENSG00000112425	EPM2A	0.234768	0.532645	0.194693	0.247694	0.304165	0	0.382284	0.320794	0.27219	0.106183	0.352683	0	0	0.316563	0.264221	0.179503	0.00670696	0.212318	0.317749	0.191212	0.27897	0.238473
ENSG00000172247	C1QTNF4	0.234695	0.45477	0.416923	0.28531	0.430725	0.243891	0	0.44796	0.58222	0.449703	0.557949	0.451691	0.445035	0.417048	0.459495	0.406121	0.215851	0.000206612	0.0742959	0.327564	0.437496	0
ENSG00000176956	LY6H	0.234674	0.39277	0.336361	0.189619	0	0	0.12028	0.319567	0.515701	0.418337	0.433598	0.42049	0.212099	0.291188	0.406313	0.453618	0.429145	0.370361	0.452344	0.409724	0.42178	0.393702
ENSG00000151778	SERP2	0.234645	0.421311	0.401791	0.290482	0.355912	0.0967199	0.150467	0.401154	0.441894	0.418661	0.442232	0.421983	0.245334	0.397061	0.426521	0.43888	0.342969	0.346721	0.441518	0.328983	0.427712	0.43723
ENSG00000133318	RTN3	0.234546	0.262866	0.289509	0.25463	0.22594	0.197855	0.225207	0.270141	0.22981	0.231265	0.269432	0.229076	0.234425	0.290501	0.297255	0.296139	0.230858	0.236725	0.286421	0.325566	0.247481	0.259371
ENSG00000198680	TUSC1	0.234397	0	0.350246	0.491429	0.0340077	0	0.280703	0	0	0	0	0	0	0.273974	0.123577	0.441973	0.504062	0.35138	0.263783	0.207162	0.19268	0.277531
ENSG00000172554	SNTG2	0.234397	0.248407	0	0	0	0	0	0.208553	0	0	0.129253	0.220112	0	0.0478586	0	0.030398	0	0	0	0.169544	0	0
ENSG00000157657	ZNF618	0.234326	0.410186	0.614459	0.51106	0	0	0.126778	0.495602	0	0.38525	0.371385	0.381001	0	0.690321	0.507286	0.65787	0.176843	0.416445	0.171584	0	0.409597	0.390867
ENSG00000134247	PTGFRN	0.234197	0.276238	0.00424519	0.0361205	0.281497	0	0	0.022567	0	0	0	0.321569	0	0.00869095	0	0	0	0.34117	0	0.434687	0.0012385	0
ENSG00000160310	PRMT2	0.233906	0.351779	0.248652	0.322214	0.0723874	0	0.44892	0.240883	0.458789	0.135704	0.445812	0.407534	0	0.115986	0.411178	0	0.103185	0.267466	0.300462	0	0.416403	0.436228
ENSG00000225190	PLEKHM1	0.233841	0	0	0	0.0512524	0	0.249042	0	0	0	0	0	0	0.207566	0	0.148629	0	0	0.222036	0.136674	0.0657078	0.0749472
ENSG00000163558	PRKCI	0.233782	0.183852	0.286848	0.20246	0.264166	0	0.268544	0.339166	0.0424899	0.191926	0.0975199	0.0199002	0.00795455	0.254965	0.247666	0.339228	0.243447	0.347289	0.37523	0.366078	0.314808	0.314693
ENSG00000138032	PPM1B	0.233762	0.294271	0.26126	0.320688	0.356137	0.0973507	0.305808	0.330644	0.364169	0.402512	0.247105	0.13527	0.168316	0.322534	0.332169	0.0625674	0	0.155751	0.135665	0.214309	0.304762	0.357472
ENSG00000203780	FANK1	0.233594	0.0225088	0	0.04522	0	0	0.165248	0	0.159245	0.0938658	0	0	0	0	0	0.316865	0.118146	0.344008	0.225962	0.42832	0	0
ENSG00000158856	DMTN	0.233405	0.412112	0.363318	0.173762	0.300412	0	0.284072	0.409504	0.428212	0.413172	0.441301	0.356703	0.276527	0.397315	0.389878	0.517818	0.423744	0.385365	0.445087	0.377662	0.334476	0.287194
ENSG00000142459	EVI5L	0.233304	0.0356133	0.225154	0.231622	0.0752925	0	0.427097	0.155999	0.00772108	0.0199458	0.0497933	0.106291	0	0.322348	0.287653	0.0142076	0	0	0.0856728	0.0244546	0.290575	0.0953138
ENSG00000184402	SS18L1	0.233278	0.444715	0.500888	0.450615	0.329074	0.293282	0.453665	0.422505	0.397474	0.384278	0.460521	0.372706	0.046123	0.422347	0.624967	0.331934	0.17602	0.247289	0.406375	0.361444	0.512774	0.371179
ENSG00000125821	DTD1	0.232985	0.40637	0.403951	0.0402501	0.211614	0	0	0.377514	0.536007	0.414255	0.420652	0.303163	0.081016	0.340555	0.431628	0.36533	0.251863	0	0.300764	0.131281	0.315969	0.162182
ENSG00000107295	SH3GL2	0.232939	0.402075	0.311915	0.557912	0.382026	0.399598	0.395291	0.45924	0.312996	0.416851	0.419112	0.42324	0.331429	0.434999	0.330125	0.435996	0.401863	0.520293	0.580848	0.355247	0.301621	0
ENSG00000090615	GOLGA3	0.232856	0	0.301715	0.137876	0.165418	0	0.323056	0.363942	0.106154	0.275266	0.272048	0.0805229	0	0.300574	0.161846	0.209944	0	0.194867	0.304113	0.188631	0.261328	0.315302
ENSG00000130758	MAP3K10	0.232661	0.0704183	0.238801	0.118258	0.457154	0.206813	0.175297	0.0575394	0.0455592	0.225182	0	0	0.247692	0.219746	0.245815	0.601996	0.207288	0.265053	0.545463	0.427869	0.31428	0.345781
ENSG00000039123	SKIV2L2	0.232461	0.222532	0.110472	0.155715	0.0204239	0	0	0.183766	0.0203817	0.110149	0.0105693	0.118473	0	0.160035	0	0.12087	0	0.318347	0.0710161	0.156195	0.0330414	0
ENSG00000177595	PIDD1	0.232353	0	0	0.367575	0	0	0	0	0	0.187759	0	0	0	0	0.540742	0.00869633	0.023806	0	0	0	0.0548339	0
ENSG00000101052	IFT52	0.232332	0	0	0.0572709	0.0384393	0	0.127508	0	0	0.0377653	0.024239	0	0	0.135841	0	0	0	0.116303	0	0	0.0550198	0
ENSG00000112541	PDE10A	0.232268	0	0	0	0.156957	0	0.112691	0	0.0632074	0	0.0417136	0	0.0325535	0	0.120414	0.314482	0.188091	0	0.293583	0.310896	0	0.212397
ENSG00000070081	NUCB2	0.232196	0	0	0.0986214	0	0	0.102151	0	0.267154	0	0.0779895	0.114243	0	0	0.06499	0.268624	0.296359	0.165862	0.288603	0.274118	0.0303432	0.308773
ENSG00000127022	CANX	0.232046	0.236102	0.302332	0.364582	0.139302	0.171468	0.273083	0.259321	0.106992	0.0884005	0.208073	0.197466	0.0945856	0.267676	0.313208	0.0970661	0.0988733	0.165238	0.12814	0.127872	0.271052	0.142989
ENSG00000108309	RUNDC3A	0.231951	0.170742	0.265093	0.0485541	0.38067	0	0.207117	0.273046	0.295074	0.328881	0.267375	0.151971	0	0.303038	0.302909	0.389607	0.332848	0.327988	0.416905	0.347468	0.312513	0.355667
ENSG00000169933	FRMPD4	0.231858	0.206716	0.538837	0.152841	0.480173	0.0577528	0.144065	0.0168403	0.466488	0	0	0	0	0.303511	0	0.0240547	0	0.102755	0.508489	0.301613	0.387551	0.690333
ENSG00000132718	SYT11	0.231742	0.221661	0.229567	0.234369	0.210967	0.171257	0.222044	0.230151	0.199214	0.192002	0.230177	0.169887	0.192045	0.235164	0.236308	0.217272	0.1947	0.230424	0.214704	0.288798	0.226778	0.22685
ENSG00000081760	AACS	0.231447	0	0	0	0	0	0	0	0	0	0	0	0	0	0	0	0	0.20885	0.238941	0.0855163	0	0
ENSG00000138071	ACTR2	0.231442	0.255062	0.283642	0.282564	0.206176	0.053196	0.310611	0.170549	0.241601	0.304101	0.186257	0.115946	0.187099	0.325243	0.309082	0.375283	0.213719	0.361819	0.386432	0.336144	0.358095	0.17657
ENSG00000056586	RC3H2	0.231271	0.172378	0.24244	0.31553	0.122774	0.230731	0.172033	0.276505	0.113293	0.0669539	0.113058	0.150122	0.044385	0.247369	0.198737	0.358392	0.266479	0.353279	0.355958	0.26643	0.158463	0.0631694
ENSG00000095370	SH2D3C	0.231129	0	0.230783	0.0932008	0.457589	0.272713	0	0.326969	0.267903	0	0.201016	0	0.00494652	0.198601	0	0.113017	0	0.0316017	0	0.304858	0.320152	0
ENSG00000163517	HDAC11	0.231005	0.500858	0.553699	0.441334	0.252166	0.161165	0.354372	0.450778	0.561456	0.446558	0.528579	0.450263	0.273153	0.449105	0.547583	0.0785846	0.154576	0.268511	0.216181	0.248544	0.484822	0.405706
ENSG00000047579	DTNBP1	0.230875	0.378318	0.302524	0.0964318	0.326844	0	0	0.305299	0.0222521	0.163283	0.216846	0.226474	0	0.379399	0.0415425	0.388066	0.0140837	0.317146	0.38104	0.560052	0.351577	0.111743
ENSG00000107147	KCNT1	0.230722	0.404885	0.389173	0.398349	0.415293	0.469807	0.0747754	0.621242	0.380121	0.433581	0.384892	0.356486	0.791343	0.516952	0.416415	0.48097	0.381415	0	0	0.551608	0.323883	0.0709213
ENSG00000120251	GRIA2	0.230429	0.361503	0.2819	0.275438	0	0	0.130446	0.340618	0.443347	0.483975	0.338514	0.288491	0.375271	0.268221	0.285559	0.399476	0.30365	0.299368	0.392006	0.48276	0.315964	0.318865
ENSG00000133243	BTBD2	0.230256	0.175316	0.370982	0.0319384	0.362752	0.087509	0.306049	0.288564	0	0.183576	0.23187	0	0	0.368752	0.41891	0.170895	0	0.171866	0.287621	0.173904	0.369273	0.381444
ENSG00000178381	ZFAND2A	0.230136	0.353321	0.307905	0.075134	0.283136	0.0865917	0.0307159	0.283546	0.254323	0.298814	0.27566	0.0494625	0	0.343758	0.269371	0.28283	0.153765	0.305414	0.382826	0.268394	0.357374	0.182631
ENSG00000160014	CALM3	0.230047	0.231865	0.237591	0.0821122	0.225165	0.108495	0	0.233609	0.238298	0.250937	0.235203	0.221206	0.225201	0.241207	0.233886	0.250788	0.21321	0.2203	0.283305	0.216229	0.236465	0.227293
ENSG00000177551	NHLH2	0.230042	0.781769	0	0.929494	0.257099	0	0	0.366431	0	0	0.399171	0.417988	0	0	0	0	0	0	0.0165587	0	0	0
ENSG00000156976	EIF4A2	0.229851	0.326072	0.305136	0.251177	0.270756	0.100084	0.248667	0.311556	0.384815	0.352584	0.367012	0.33765	0.321917	0.326876	0.352578	0.212308	0.20292	0.18564	0.304386	0.139237	0.306736	0.321499
ENSG00000145332	KLHL8	0.229727	0.0453122	0.333352	0.101587	0.16369	0.209791	0.121117	0.10788	0.157082	0.344653	0.00267756	0	0.0526738	0.345468	0.284361	0.179736	0.193082	0	0.316986	0.245042	0.309341	0.369836
ENSG00000100034	PPM1F	0.229709	0.458122	0.634726	0.584533	0.278372	0	0.387123	0.599632	0.16248	0	0.320059	0.443961	0.0858957	0.598036	0.386201	0.202906	0	0.0506198	0.234133	0.334086	0.449612	0.155714
ENSG00000181392	SYNE4	0.22967	0.289962	0.18555	0.0630841	0	0	0	0.525355	0.235497	0.144969	0.598481	0.294676	0.223684	0.213163	0.586672	0.0973518	0	0	0	0.0266119	0	0.128267
ENSG00000023287	RB1CC1	0.229509	0.308219	0.324363	0.251119	0.122839	0.0796888	0.243048	0.290522	0.175122	0.256058	0.16943	0.0927822	0.143984	0.332276	0.257423	0.281001	0.0804208	0.244943	0.239465	0.336303	0.313646	0.236776
ENSG00000248713	AC083902	0.229351	0	0	0	0	0	0	0	0	0	0	0	0	0	0	0.567822	0	0.834356	0	0	0	0.53792
ENSG00000114520	SNX4	0.229288	0.00717317	0	0.123306	0	0	0.313335	0	0.0236428	0	0	0	0	0	0.0883834	0	0	0	0	0	0.0682944	0
ENSG00000100150	DEPDC5	0.229225	0.147018	0.313241	0.319727	0.176289	0	0	0.300827	0.142862	0	0	0.140108	0	0.51488	0.303908	0	0.208762	0.0792675	0.0778286	0.184052	0.364818	0.285615
ENSG00000033170	FUT8	0.229214	0	0	0	0.176657	0	0	0	0	0	0	0	0	0	0	0	0	0	0.093106	0	0	0.357965
ENSG00000106261	ZKSCAN1	0.22919	0.0735502	0.103588	0.304275	0.319119	0	0.294681	0.308614	0.18396	0.296814	0.151904	0.32289	0.284809	0.328748	0.271083	0.234057	0	0.1579	0.381635	0.22889	0.259909	0.315873
ENSG00000114999	TTL	0.229091	0	0.216447	0.0888552	0.315573	0	0.150791	0.191071	0	0	0	0	0.235191	0.0806442	0.160888	0.420924	0.106958	0.397511	0.404942	0.403869	0.257012	0
ENSG00000122733	PHF24	0.229006	0.387172	0.368997	0.158912	0.359481	0.25785	0.438806	0.325719	0.15556	0.288857	0.176381	0	0.209565	0.445244	0.381295	0.598903	0.442138	0.493071	0.37021	0.610702	0.471997	0
ENSG00000103257	SLC7A5	0.228999	0	0	0	0.185801	0	0	0	0	0	0	0	0	0	0	0	0	0	0	0	0	0.280501
ENSG00000056050	HPF1	0.228939	0.193194	0.167912	0	0.152856	0	0.0242739	0.285723	0.295156	0.287011	0.243707	0.1027	0.159158	0.242041	0.283814	0.127659	0.13986	0	0.167146	0.0601271	0.188143	0.385211
ENSG00000068745	IP6K2	0.22888	0.122822	0.179308	0	0.09901	0	0.0938994	0	0.373867	0.316675	0.347304	0.282796	0	0.137304	0.246374	0.0302249	0	0	0.245197	0.083608	0.269484	0.192832
ENSG00000183783	KCTD8	0.228593	0.386129	0.347783	0.441924	0.10713	0.601964	0	0.387575	0.613796	0.818108	0.34393	0.276718	0.70421	0.38262	0.399533	0	0	0	0	0.122747	0.42197	0
ENSG00000061676	NCKAP1	0.228371	0.240408	0.352922	0.307745	0.209958	0.148339	0.209605	0.318023	0.143056	0.136813	0.260732	0.078129	0.194987	0.351405	0.296722	0.433007	0.344838	0.356225	0.467619	0.381582	0.274328	0.150542
ENSG00000136002	ARHGEF4	0.22823	0.390299	0.453077	0.41856	0.429474	0.328668	0.33357	0.470125	0.364226	0.419752	0.437637	0.367961	0.373693	0.52553	0.438203	0.373994	0.330283	0.284858	0.590895	0.336713	0.464315	0.564727
ENSG00000117600	PLPPR4	0.227879	0.170474	0.0334951	0.130666	0	0.0508831	0.275337	0	0.357368	0.354425	0.126597	0.129639	0.0983957	0.051023	0.0443834	0.646847	0.510676	0.414667	0.632966	0.593616	0.322977	0.163826
ENSG00000076344	RGS11	0.227662	0	0	0.246415	0.110288	0	0.347999	0.23456	0.594543	0.294564	0.0842177	0.169942	0.47178	0.109672	0	0.219619	0.112932	0.513045	0.556102	0.660482	0.135425	0.450498
ENSG00000145194	ECE2	0.227343	0.509474	0.443375	0.533356	0.319103	0.20822	0.442793	0.505409	0.425079	0.259758	0.46625	0.438943	0.361555	0.446946	0.466615	0.220312	0	0	0.213698	0	0.375411	0.44087
ENSG00000169217	CD2BP2	0.22728	0	0.252178	0	0.247587	0	0.105673	0.00552362	0	0.124415	0.198241	0	0.0287433	0.263392	0.12499	0.246009	0	0	0.335535	0.172977	0.0472399	0.212675
ENSG00000134759	ELP2	0.227268	0.173111	0.349501	0.29145	0.217102	0.0517728	0.156336	0.372545	0.0298293	0	0.284084	0	0.0987968	0.375734	0.259926	0.284279	0	0.135572	0.283869	0.258795	0.321685	0.136924
ENSG00000166546	BEAN1	0.227019	0.225969	0.366212	0.440951	0.30737	0	0.647208	0.400759	0.302071	0	0.342052	0.343434	0	0.409425	0.331682	0	0.284532	0.281794	0	0	0.358537	0.439461
ENSG00000101856	PGRMC1	0.226558	0.376661	0.343197	0.41542	0.0180194	0	0.390247	0.250484	0.417331	0.075184	0.402363	0.328844	0	0.10242	0.375424	0.414573	0.359252	0.372326	0.338506	0.313929	0.392311	0.343383
ENSG00000127720	METTL25	0.226492	0	0	0	0	0	0	0	0	0.0364512	0	0	0	0	0.0328355	0	0.107827	0	0.10323	0.00542611	0.0182602	0.102249
ENSG00000078369	GNB1	0.226461	0.241978	0.260789	0.210385	0.201621	0.120269	0.222822	0.238291	0.198446	0.257523	0.237572	0.17955	0.172393	0.283192	0.310627	0.318389	0.222695	0.222366	0.307431	0.194059	0.276608	0.302479
ENSG00000006114	NA	0.226459	0	0.115461	0.38885	0.0128822	0.11051	0.407689	0.0588055	0.0397564	0.179082	0.227692	0	0	0.0489419	0.00596125	0	0	0	0.19494	0.20846	0.147596	0.0509312
ENSG00000163605	PPP4R2	0.226452	0.0461709	0.0305561	0	0.0591923	0	0.267833	0.119456	0.242435	0.212106	0.0500752	0.252877	0.0756684	0.0508566	0.00870902	0.320343	0.32504	0.315948	0.456222	0.250007	0.0888335	0.293562
ENSG00000115525	ST3GAL5	0.226328	0	0.261763	0	0.127561	0	0	0.239384	0	0	0.0809846	0	0	0.336103	0.29247	0.602407	0.556302	0.490911	0.407877	0.504431	0.158762	0.0092068
ENSG00000082898	XPO1	0.226233	0.0932436	0.251253	0.574814	0	0	0.466672	0.0147746	0	0	0.0581183	0.0737778	0.0253342	0.0584123	0	0.0537	0.16918	0	0.185754	0	0.213077	0.0165152
ENSG00000135870	RC3H1	0.226068	0.115509	0.0353611	0.468189	0	0	0.55237	0	0	0	0	0	0	0.129096	0.177854	0.0126675	0	0	0.0661867	0	0.0625885	0.108726
ENSG00000130227	XPO7	0.226059	0.270786	0.247157	0.549746	0	0.022603	0.389376	0.183764	0.228981	0.166268	0.192382	0.0815203	0	0.286517	0.273353	0.160994	0	0.092043	0.055025	0.188203	0.230217	0.243824
ENSG00000170004	CHD3	0.225854	0.287256	0.15376	0.317288	0.288517	0.208263	0.177221	0.207602	0.175832	0.268461	0.29072	0.19753	0.0176471	0.201392	0.273381	0.419092	0.36838	0.324641	0.424878	0.349967	0.313189	0.32745
ENSG00000197296	FITM2	0.225773	0.16306	0.443859	0.347263	0.398594	0.216241	0.303306	0.322773	0	0.00445391	0.14362	0	0.276318	0.493373	0.257261	0.114436	0.00172453	0.158289	0.310758	0.338699	0.349838	0.383554
ENSG00000221968	FADS3	0.225633	0	0.000736687	0.298028	0	0	0.314615	0.254001	0.211964	0	0.377752	0.364754	0	0	0.271538	0.102829	0	0	0.151153	0.206571	0	0.309552
ENSG00000100614	PPM1A	0.225631	0.354118	0.453771	0.418722	0.345106	0.141855	0.37473	0.399462	0.212741	0.149879	0.361806	0.149475	0.141444	0.404778	0.419956	0.306257	0.0404691	0.308793	0.266384	0.311595	0.408868	0.234743
ENSG00000176871	WSB2	0.225555	0.160767	0.262413	0.181082	0.31379	0.0227082	0.156432	0.317333	0.102628	0.127723	0.142147	0	0.139305	0.301349	0.313169	0.473467	0.361441	0.397636	0.564569	0.391552	0.322824	0.341769
ENSG00000143256	PFDN2	0.225548	0.374582	0.306372	0.185082	0.204667	0	0.181743	0.298349	0.377247	0.326603	0.361187	0.319656	0.218717	0.312423	0.366758	0.145657	0.195045	0.204081	0.163987	0.169097	0.290102	0.328043
ENSG00000178038	ALS2CL	0.225286	0	0	0	0	0	0	0	0	0.0525135	0	0	0	0	0	0	0	0	0	0	0	0
ENSG00000087299	L2HGDH	0.224803	0.00393701	0.225855	0.398182	0	0	0.0981083	0.49476	0.275114	0.0549972	0.340378	0.191157	0.30355	0.203002	0.589089	0.122556	0	0.199793	0.152015	0.254696	0.262059	0.264672
ENSG00000120688	WBP4	0.224656	0.137604	0.118679	0.126007	0.250082	0	0.320361	0.0899048	0.306771	0.247882	0.170508	0.155426	0	0.230881	0.265382	0.186113	0.130145	0.178539	0.322345	0.198774	0.253718	0.327054
ENSG00000197603	C5orf42	0.224478	0.333584	0.328745	0.454801	0.147631	0	0.283016	0.336818	0.324395	0.0754339	0.378846	0.352959	0.291823	0.335091	0.371965	0.300308	0.17327	0.0676481	0.243078	0.46176	0.32964	0.346644
ENSG00000114988	LMAN2L	0.224279	0.0733987	0	0	0	0	0	0.0507326	0.258345	0.136262	0.0403514	0.0995009	0.125334	0	0	0.36568	0.231523	0	0.454489	0.192684	0.131813	0
ENSG00000171451	DSEL	0.224203	0	0.182579	0.63716	0	0.470224	0.59293	0	0.161645	0	0	0	0	0	0.185096	0.306814	0.371539	0.0319805	0	0	0	0
ENSG00000141002	TCF25	0.224048	0.29498	0.323312	0.260237	0.294389	0.19775	0.214367	0.304345	0.275881	0.345388	0.299967	0.191323	0.225334	0.325647	0.317602	0.297272	0.202288	0.213791	0.308384	0.285018	0.311284	0.309628
ENSG00000172733	PURG	0.224014	0	0	0.0856524	0.202068	0.166781	0.0194733	0.00161667	0	0	0	0	0	0.0867316	0	0.270568	0	0.226355	0.481761	0.237893	0.0133139	0.582608
ENSG00000136141	LRCH1	0.223925	0.540177	0.518775	0.378671	0.317357	0	0.301292	0.461769	0.161013	0	0.513897	0	0	0.552731	0.429082	0	0	0	0	0	0.367945	0
ENSG00000117153	KLHL12	0.223863	0.373635	0.197844	0.272809	0.269876	0.0864786	0.34898	0.223967	0.124704	0.3264	0.261523	0	0.396923	0.275349	0.299595	0.272073	0.0711444	0.315449	0.388269	0.355526	0.346902	0.290602
ENSG00000120709	FAM53C	0.223858	0.165995	0.155889	0	0.199399	0	0.0968852	0.068787	0.0587953	0	0.187799	0	0	0.0862456	0.281753	0.208395	0.189941	0.255583	0.294453	0.25084	0.134772	0.2039
ENSG00000182934	SRPRA	0.223775	0.0536472	0.0470237	0.19148	0	0	0.116117	0.117621	0	0	0.139431	0	0	0.213396	0.251202	0	0.0250057	0	0.0369837	0.192298	0.0665251	0.0459984
ENSG00000023516	AKAP11	0.223737	0.366735	0.3832	0.373708	0.325854	0.119008	0.31096	0.400356	0.322146	0.37999	0.374174	0.267155	0.26111	0.380495	0.369606	0.42015	0.349231	0.380672	0.421835	0.37697	0.350291	0.318429
ENSG00000143353	LYPLAL1	0.223736	0	0.277724	0	0.157101	0	0.0713093	0	0.0051314	0.0517164	0.141188	0.203789	0	0.0708306	0.0216754	0	0	0	0.066324	0	0.193823	0.0577422
ENSG00000198208	RPS6KL1	0.223708	0.349362	0.257179	0.214369	0.135391	0	0	0.322296	0.152472	0.321353	0.336308	0.405107	0.139462	0.277062	0.331947	0.270795	0.353166	0.232332	0.511381	0.402705	0.290632	0.318334
ENSG00000064205	WISP2	0.223695	0	0	0	0	0	0	0	0	0	0	0	0	0	0	0.0532189	0	0	0	0	0	0
ENSG00000180543	TSPYL5	0.223663	0.368507	0.546914	0.662075	0.274326	0.00269663	0.404042	0.446266	0.464102	0.396361	0.444468	0.304772	0.332268	0.394894	0.310733	0.407434	0.409865	0.403923	0.357106	0.340725	0.346702	0.268717
ENSG00000131409	LRRC4B	0.223549	0.304132	0.549724	0.279681	0.263029	0.0342725	0.237457	0.54402	0.368029	0.301108	0.297566	0.180096	0.269966	0.590439	0.465341	0.382466	0.196889	0.308619	0.354451	0.461618	0.34117	0.449722
ENSG00000180104	EXOC3	0.223514	0.333682	0.373613	0.195206	0.344722	0	0.0489615	0.21429	0.0977844	0.0759101	0.214759	0.0396724	0.0673128	0.391613	0.289431	0.304836	0.275904	0.144749	0.282102	0.314918	0.304419	0.399123
ENSG00000126107	HECTD3	0.223485	0.133856	0.305802	0.308459	0.381838	0.00393258	0.315648	0.433848	0.305691	0.213301	0.353415	0.0220118	0.0933188	0.35618	0.231644	0.0812447	0	0	0.127361	0.1384	0.246505	0.136674
ENSG00000181072	CHRM2	0.223484	0.656674	0.632454	0.614347	0.74526	0.388739	0.342755	0.244286	0.418352	0.545225	0.25257	0.473501	0.902975	0.758213	0.394154	0	0	0	0	0	0.51192	0
ENSG00000178605	GTPBP6	0.223216	0.0411699	0	0	0.487409	0	0.102114	0	0.281684	0.134894	0.0608794	0	0	0	0	0.220553	0	0.0832128	0.249852	0.10081	0.0389685	0.322454
ENSG00000125484	GTF3C4	0.223174	0.2043	0.338939	0.34456	0.295339	0.0523009	0.434667	0.255714	0.204301	0	0.27467	0	0.222594	0.29128	0.283057	0.147117	0	0.0305195	0.255353	0.0655196	0.304017	0.280975
ENSG00000171115	GIMAP8	0.223057	0	0	0.0717061	0	0	0.110151	0	0	0	0	0	0	0	0	0	0	0	0	0	0	0
[truncated: 13,072 more rows]
