# Supplementary material for: Genetic mapping of etiologic brain cell types for obesity
Source: eLife. 2020 Sep 21;9:e55851. doi: 10.7554/eLife.55851 (PMC7505664; doi:10.7554/eLife.55851)
Supplement: Figure 3—source data 4. [file elife-55851-fig3-data4.xlsx]

## Sheet: 7 - MNS BMI-prioritized 
Annotation	Significant GWAS traits (FWER<0.05)	Probable location	Region	Description
DEGLU4	Major Depression Disorder (Howard, 2019) Schizophrenia (Pardinas, 2018) Intelligence (Savage, 2018) Educational Attainment (Lee, 2018) Worry (Nagel, 2018) Neuroticism (Nagel, 2018) BMI (Loh, 2018)	Parafascicular nucleus	Thalamus	Excitatory neurons, thalamus
DEGLU5	Bipolar Disorder (PGC, 2018) Worry (Nagel, 2018) Neuroticism (Nagel, 2018) BMI (Loh, 2018)	Anterior pretectal nucleus	Midbrain dorsal	Excitatory neurons, midbrain
DEINH3	Bipolar Disorder (PGC, 2018) BMI (Loh, 2018)	Subthalamic nucleus	Hypothalamus	Inhibitory neurons, hypothalamus
HBGLU2	Bipolar Disorder (PGC, 2018) Intelligence (Savage, 2018) BMI (Loh, 2018)	Nucleus of the solitary tract	Medulla	Excitatory neurons, hindbrain
HBGLU5	Schizophrenia (Pardinas, 2018) Worry (Nagel, 2018) Neuroticism (Nagel, 2018) BMI (Loh, 2018)	Pontine reticular nucleus, caudal part	Pons	Excitatory neurons, hindbrain
HBINH8	BMI (Loh, 2018)	Spinal nucleus of the trigeminal	Medulla	Inhibitory neurons, hindbrain
HBSER5	Bipolar Disorder (PGC, 2018) BMI (Loh, 2018)	Nucleus raphe pons (pallidus, oscurus, magnus, B1-3)	Pons	Serotonergic neurons, hindbrain
MEGLU1	Bipolar Disorder (PGC, 2018) Intelligence (Savage, 2018) Educational Attainment (Lee, 2018) Worry (Nagel, 2018) BMI (Loh, 2018)	Superior colliculus, red nucleus	Midbrain dorsal	Excitatory neurons, midbrain
MEGLU10	Major Depression Disorder (Howard, 2019) Intelligence (Savage, 2018) Educational Attainment (Lee, 2018) Worry (Nagel, 2018) Neuroticism (Nagel, 2018) BMI (Loh, 2018)	Inferior colliculus	Midbrain dorsal	Excitatory neurons, midbrain
MEGLU11	Depression (Nagel, 2018) Major Depression Disorder (Howard, 2019) Intelligence (Savage, 2018) Educational Attainment (Lee, 2018) Worry (Nagel, 2018) BMI (Loh, 2018) Insomnia (Jansen, 2018)	Inferior colliculus	Midbrain dorsal	Excitatory neurons, midbrain
MEGLU2	Depression (Nagel, 2018) Major Depression Disorder (Howard, 2019) Intelligence (Savage, 2018) Worry (Nagel, 2018) Neuroticism (Nagel, 2018) BMI (Loh, 2018)	Periaqueductal grey	Midbrain dorsal	Excitatory neurons, midbrain
MEGLU3	Bipolar Disorder (PGC, 2018) Intelligence (Savage, 2018) Worry (Nagel, 2018) Neuroticism (Nagel, 2018) BMI (Loh, 2018) Insomnia (Jansen, 2018)	Periaqueductal grey	Midbrain dorsal	Excitatory neurons, midbrain
MEGLU7	Bipolar Disorder (PGC, 2018) Major Depression Disorder (Howard, 2019) Intelligence (Savage, 2018) Educational Attainment (Lee, 2018) Worry (Nagel, 2018) Neuroticism (Nagel, 2018) BMI (Loh, 2018) Insomnia (Jansen, 2018)	Inferior colliculus	Midbrain dorsal	Excitatory neurons, midbrain
MEINH2	Bipolar Disorder (PGC, 2018) Worry (Nagel, 2018) BMI (Loh, 2018)	Midbrain	Midbrain dorsal,Midbrain ventral	Inhibitory neurons, midbrain
MEINH3	Bipolar Disorder (PGC, 2018) Intelligence (Savage, 2018) BMI (Loh, 2018)	Dorsal midbrain, medial geniculate nucleus, anteroventral midbrain	Midbrain dorsal	Inhibitory neurons, midbrain
TEGLU17	Bipolar Disorder (PGC, 2018) Major Depression Disorder (Howard, 2019) Schizophrenia (Pardinas, 2018) Intelligence (Savage, 2018) Educational Attainment (Lee, 2018) Worry (Nagel, 2018) Neuroticism (Nagel, 2018) BMI (Loh, 2018) Insomnia (Jansen, 2018)	Piriform pyramidal	Cortex	Excitatory neurons, cerebral cortex
TEGLU19	Bipolar Disorder (PGC, 2018) Schizophrenia (Pardinas, 2018) Intelligence (Savage, 2018) Educational Attainment (Lee, 2018) Worry (Nagel, 2018) Neuroticism (Nagel, 2018) BMI (Loh, 2018)	Anterior olfactory nucleus and ventral striatum	Cortex	Excitatory neurons, cerebral cortex
TEGLU21	Bipolar Disorder (PGC, 2018) Depression (Nagel, 2018) Major Depression Disorder (Howard, 2019) Schizophrenia (Pardinas, 2018) Intelligence (Savage, 2018) Educational Attainment (Lee, 2018) Worry (Nagel, 2018) Neuroticism (Nagel, 2018) BMI (Loh, 2018) Risk Tolerance (Linner, 2019)	CA1 (posterior),subiculum,entorhinal	Hippocampus	Excitatory neurons, hippocampus CA1
TEGLU23	Bipolar Disorder (PGC, 2018) Schizophrenia (Pardinas, 2018) Intelligence (Savage, 2018) Educational Attainment (Lee, 2018) BMI (Loh, 2018)	CA3	Hippocampus	Excitatory neurons, hippocampus CA3
TEGLU4	Bipolar Disorder (PGC, 2018) Schizophrenia (Pardinas, 2018) Intelligence (Savage, 2018) Educational Attainment (Lee, 2018) Worry (Nagel, 2018) Neuroticism (Nagel, 2018) BMI (Loh, 2018) Risk Tolerance (Linner, 2019)	Cortex pyramidal layer 5, Cingulate/Retrosplenial area (superficial and deep)	Cortex	Excitatory neurons, cerebral cortex
TEINH1	Bipolar Disorder (PGC, 2018) Intelligence (Savage, 2018) Educational Attainment (Lee, 2018) Worry (Nagel, 2018) BMI (Loh, 2018)	Medial septal nucleus and Magnocellular nucleus	Pallidum	Inhibitory neurons, pallidum
TEINH12	Bipolar Disorder (PGC, 2018) Intelligence (Savage, 2018) Worry (Nagel, 2018) BMI (Loh, 2018)	Hippocampus,Cortex	Hippocampus,Cortex	Non-border Cck interneurons, cortex/hippocampus
