# Supplementary material for: Genetic mapping of etiologic brain cell types for obesity
Source: eLife. 2020 Sep 21;9:e55851. doi: 10.7554/eLife.55851 (PMC7505664; doi:10.7554/eLife.55851)
Supplement: Figure 3—source data 5. [file elife-55851-fig3-data5.xlsx]

## Sheet: 8 - S-LDSC Modules
Module ID	Module color ID	No. genes	P-value	Module cell-type	Module cell-type description
M1	floralwhite_427	33	0.000187739	MEINH2	Inhibitory neurons, midbrain
M2	magenta_72	58	0.00507954	DEGLU5	Excitatory neurons, midbrain
M3	wheat_126	314	0.00531194	HBGLU5	Excitatory neurons, hindbrain
M4	darkorange_544	407	0.00629071	TEINH1	Inhibitory neurons, pallidum
M5	chocolate_274	27	0.011096	HBSER5	Serotonergic neurons, hindbrain
M6	lightcoral_316	115	0.0112318	HBSER5	Serotonergic neurons, hindbrain
M7	darkred_417	268	0.0121004	MEGLU11	Excitatory neurons, midbrain
M8	lightcyan_59	61	0.0124244	DEGLU5	Excitatory neurons, midbrain
M9	lightcyan_446	78	0.0127323	MEINH2	Inhibitory neurons, midbrain
M10	gainsboro_558	28	0.0130943	TEINH12	Non-border Cck interneurons, cortex/hippocampus
M11	cornflowerblue_405	156	0.0168861	MEGLU10	Excitatory neurons, midbrain
M12	seashell_113	25	0.017389	HBGLU2	Excitatory neurons, hindbrain
M13	cadetblue_272	18	0.020332	HBSER5	Serotonergic neurons, hindbrain
M14	moccasin_473	162	0.0243681	TEGLU17	Excitatory neurons, cerebral cortex
M15	royalblue_366	74	0.0254243	MEGLU2	Excitatory neurons, midbrain
M16	gold_560	25	0.0304267	TEINH12	Non-border Cck interneurons, cortex/hippocampus
M17	darkgoldenrod_539	16	0.0308609	TEINH1	Inhibitory neurons, pallidum
M18	palegoldenrod_482	64	0.0312842	TEGLU17	Excitatory neurons, cerebral cortex
M19	darkslateblue_420	140	0.0319363	MEINH2	Inhibitory neurons, midbrain
M20	forestgreen_428	114	0.0337029	MEINH2	Inhibitory neurons, midbrain
M21	lightseagreen_194	41	0.0343309	HBSER5	Serotonergic neurons, hindbrain
M22	lightyellow_456	20	0.0368052	MEINH3	Inhibitory neurons, midbrain
M23	indianred_308	27	0.0375002	HBSER5	Serotonergic neurons, hindbrain
M24	mediumpurple_335	106	0.0380064	MEGLU1	Excitatory neurons, midbrain
M25	lightsalmon_451	77	0.0385409	MEINH3	Inhibitory neurons, midbrain
M26	tan_378	27	0.0425108	MEGLU3	Excitatory neurons, midbrain
M27	cadetblue_530	79	0.0446478	TEGLU23	Excitatory neurons, hippocampus CA3
M28	snow_375	30	0.046155	MEGLU3	Excitatory neurons, midbrain
M29	coral_146	18	0.0475937	HBGLU5	Excitatory neurons, hindbrain
M30	cyan_407	31	0.0480377	MEGLU11	Excitatory neurons, midbrain
M31	mistyrose_85	10	0.0526026	DEINH3	Inhibitory neurons, hypothalamus
M32	seashell_242	18	0.0576626	HBSER5	Serotonergic neurons, hindbrain
M33	salmon_497	27	0.0583262	TEGLU19	Excitatory neurons, cerebral cortex
M34	lightsteelblue_197	33	0.0585712	HBSER5	Serotonergic neurons, hindbrain
M35	aliceblue_131	37	0.0591283	HBGLU5	Excitatory neurons, hindbrain
M36	dodgerblue_554	19	0.0618717	TEINH12	Non-border Cck interneurons, cortex/hippocampus
M37	salmon_368	129	0.0634426	MEGLU2	Excitatory neurons, midbrain
M38	beige_264	14	0.0658592	HBSER5	Serotonergic neurons, hindbrain
M39	lavender_53	40	0.0671629	DEGLU5	Excitatory neurons, midbrain
M40	darkorchid_29	27	0.0683294	DEGLU4	Excitatory neurons, thalamus
M41	lightyellow_69	117	0.0684329	DEGLU5	Excitatory neurons, midbrain
M42	black_8	28	0.068516	DEGLU4	Excitatory neurons, thalamus
M43	mediumblue_462	105	0.0694039	MEINH3	Inhibitory neurons, midbrain
M44	white_388	131	0.0710182	MEGLU10	Excitatory neurons, midbrain
M45	palegreen_354	57	0.0763929	MEGLU2	Excitatory neurons, midbrain
M46	thistle_250	23	0.0787338	HBSER5	Serotonergic neurons, hindbrain
M47	lightpink_321	123	0.0787538	MEGLU1	Excitatory neurons, midbrain
M48	navyblue_476	103	0.0793448	TEGLU17	Excitatory neurons, cerebral cortex
M49	coral_404	29	0.0809622	MEGLU10	Excitatory neurons, midbrain
M50	olivedrab_478	11	0.0810694	TEGLU17	Excitatory neurons, cerebral cortex
M51	lightgoldenrod_447	317	0.0817859	MEINH2	Inhibitory neurons, midbrain
M52	orchid_352	144	0.0906433	MEGLU2	Excitatory neurons, midbrain
M53	paleturquoise_484	62	0.0915661	TEGLU17	Excitatory neurons, cerebral cortex
M54	royalblue_237	35	0.091773	HBSER5	Serotonergic neurons, hindbrain
M55	papayawhip_486	90	0.0925674	TEGLU17	Excitatory neurons, cerebral cortex
M56	darkviolet_35	68	0.0957081	DEGLU4	Excitatory neurons, thalamus
M57	mediumspringgreen_80	15	0.0958869	DEINH3	Inhibitory neurons, hypothalamus
M58	orange_92	27	0.0964987	HBGLU2	Excitatory neurons, hindbrain
M59	seashell_371	65	0.0994867	MEGLU3	Excitatory neurons, midbrain
M60	blueviolet_11	23	0.100454	DEGLU4	Excitatory neurons, thalamus
M61	yellow_515	36	0.101394	TEGLU21	Excitatory neurons, hippocampus CA1
M62	peru_359	65	0.102001	MEGLU2	Excitatory neurons, midbrain
M63	darkkhaki_541	116	0.103567	TEINH1	Inhibitory neurons, pallidum
M64	pink_102	37	0.104165	HBGLU2	Excitatory neurons, hindbrain
M65	antiquewhite_3	123	0.109543	DEGLU4	Excitatory neurons, thalamus
M66	sienna_372	22	0.11069	MEGLU3	Excitatory neurons, midbrain
M67	goldenrod_303	29	0.111923	HBSER5	Serotonergic neurons, hindbrain
M68	lightskyblue_195	37	0.112889	HBSER5	Serotonergic neurons, hindbrain
M69	burlywood_13	30	0.11405	DEGLU4	Excitatory neurons, thalamus
M70	royalblue_495	42	0.114136	TEGLU19	Excitatory neurons, cerebral cortex
M71	orchid_481	16	0.114154	TEGLU17	Excitatory neurons, cerebral cortex
M72	hotpink_565	52	0.116657	TEINH12	Non-border Cck interneurons, cortex/hippocampus
M73	lightpink_450	29	0.117344	MEINH3	Inhibitory neurons, midbrain
M74	limegreen_199	17	0.120218	HBSER5	Serotonergic neurons, hindbrain
M75	snow_117	15	0.120359	HBGLU2	Excitatory neurons, hindbrain
M76	lightseagreen_323	171	0.124326	MEGLU1	Excitatory neurons, midbrain
M77	purple_492	210	0.126589	TEGLU19	Excitatory neurons, cerebral cortex
M78	gainsboro_42	20	0.126717	DEGLU4	Excitatory neurons, thalamus
M79	lightgreen_62	32	0.129873	DEGLU5	Excitatory neurons, midbrain
M80	seashell_500	27	0.130076	TEGLU19	Excitatory neurons, cerebral cortex
M81	aliceblue_518	139	0.133056	TEGLU21	Excitatory neurons, hippocampus CA1
M82	mediumblue_333	78	0.133579	MEGLU1	Excitatory neurons, midbrain
M83	navyblue_89	114	0.138088	HBGLU2	Excitatory neurons, hindbrain
M84	blanchedalmond_396	17	0.140527	MEGLU10	Excitatory neurons, midbrain
M85	darkorange_157	97	0.141473	HBGLU5	Excitatory neurons, hindbrain
M86	lightslateblue_454	43	0.1422	MEINH3	Inhibitory neurons, midbrain
M87	magenta_330	29	0.145377	MEGLU1	Excitatory neurons, midbrain
M88	deeppink_36	87	0.145396	DEGLU4	Excitatory neurons, thalamus
M89	blue_397	93	0.147334	MEGLU10	Excitatory neurons, midbrain
M90	plum_232	17	0.147828	HBSER5	Serotonergic neurons, hindbrain
M91	darkmagenta_26	72	0.148788	DEGLU4	Excitatory neurons, thalamus
M92	hotpink_307	23	0.149289	HBSER5	Serotonergic neurons, hindbrain
M93	cornflowerblue_18	66	0.149634	DEGLU4	Excitatory neurons, thalamus
M94	moccasin_344	198	0.149868	MEGLU2	Excitatory neurons, midbrain
M95	midnightblue_83	34	0.150545	DEINH3	Inhibitory neurons, hypothalamus
M96	honeydew_435	71	0.150602	MEINH2	Inhibitory neurons, midbrain
M97	rosybrown_236	29	0.152597	HBSER5	Serotonergic neurons, hindbrain
M98	beige_135	16	0.156371	HBGLU5	Excitatory neurons, hindbrain
M99	palegoldenrod_224	14	0.158414	HBSER5	Serotonergic neurons, hindbrain
M100	powderblue_233	19	0.159616	HBSER5	Serotonergic neurons, hindbrain
M101	navy_88	63	0.162922	HBGLU2	Excitatory neurons, hindbrain
M102	orangered_93	27	0.163821	HBGLU2	Excitatory neurons, hindbrain
M103	blue_268	23	0.165458	HBSER5	Serotonergic neurons, hindbrain
M104	tomato_509	14	0.170184	TEGLU21	Excitatory neurons, hippocampus CA1
M105	palevioletred_356	43	0.171189	MEGLU2	Excitatory neurons, midbrain
M106	thistle_508	47	0.171278	TEGLU21	Excitatory neurons, hippocampus CA1
M107	wheat_255	21	0.17561	HBSER5	Serotonergic neurons, hindbrain
M108	lawngreen_313	159	0.175773	HBSER5	Serotonergic neurons, hindbrain
M109	lightsteelblue_455	20	0.181944	MEINH3	Inhibitory neurons, midbrain
M110	mediumorchid_334	29	0.185697	MEGLU1	Excitatory neurons, midbrain
M111	ivory_567	21	0.185708	TEINH12	Non-border Cck interneurons, cortex/hippocampus
M112	aquamarine_391	130	0.186214	MEGLU10	Excitatory neurons, midbrain
M113	peachpuff_100	45	0.186881	HBGLU2	Excitatory neurons, hindbrain
M114	linen_71	55	0.186996	DEGLU5	Excitatory neurons, midbrain
M115	seagreen_370	146	0.18821	MEGLU3	Excitatory neurons, midbrain
M116	salmon_239	20	0.189024	HBSER5	Serotonergic neurons, hindbrain
M117	white_259	19	0.18945	HBSER5	Serotonergic neurons, hindbrain
M118	blue_139	106	0.189592	HBGLU5	Excitatory neurons, hindbrain
M119	goldenrod_174	25	0.189916	HBSER5	Serotonergic neurons, hindbrain
M120	darkolivegreen_156	80	0.190415	HBGLU5	Excitatory neurons, hindbrain
M121	navajowhite_345	171	0.191105	MEGLU2	Excitatory neurons, midbrain
M122	paleturquoise_97	29	0.195685	HBGLU2	Excitatory neurons, hindbrain
M123	orchid_223	27	0.196809	HBSER5	Serotonergic neurons, hindbrain
M124	deepskyblue_295	22	0.198518	HBSER5	Serotonergic neurons, hindbrain
M125	mediumvioletred_469	23	0.201066	TEGLU4	Excitatory neurons, cerebral cortex
M126	lavenderblush_441	44	0.201339	MEINH2	Inhibitory neurons, midbrain
M127	mediumaquamarine_74	108	0.204402	DEGLU5	Excitatory neurons, midbrain
M128	oldlace_477	36	0.205925	TEGLU17	Excitatory neurons, cerebral cortex
M129	azure_5	16	0.206418	DEGLU4	Excitatory neurons, thalamus
M130	peachpuff_358	112	0.206842	MEGLU2	Excitatory neurons, midbrain
M131	darkturquoise_421	129	0.208364	MEINH2	Inhibitory neurons, midbrain
M132	mediumblue_204	37	0.211024	HBSER5	Serotonergic neurons, hindbrain
M133	floralwhite_169	105	0.211192	HBGLU5	Excitatory neurons, hindbrain
M134	bisque_7	29	0.21187	DEGLU4	Excitatory neurons, thalamus
M135	gainsboro_429	80	0.213936	MEINH2	Inhibitory neurons, midbrain
M136	palegoldenrod_95	19	0.21667	HBGLU2	Excitatory neurons, hindbrain
M137	palevioletred_227	31	0.217343	HBSER5	Serotonergic neurons, hindbrain
M138	darkblue_279	31	0.217916	HBSER5	Serotonergic neurons, hindbrain
M139	mediumaquamarine_203	24	0.219912	HBSER5	Serotonergic neurons, hindbrain
M140	cornsilk_535	54	0.220264	TEGLU23	Excitatory neurons, hippocampus CA3
M141	darkorchid_416	15	0.220431	MEGLU11	Excitatory neurons, midbrain
M142	darkblue_150	57	0.224433	HBGLU5	Excitatory neurons, hindbrain
M143	lavenderblush_570	278	0.225193	TEINH12	Non-border Cck interneurons, cortex/hippocampus
M144	darkorchid_158	37	0.225491	HBGLU5	Excitatory neurons, hindbrain
M145	violetred_383	49	0.227044	MEGLU3	Excitatory neurons, midbrain
M146	papayawhip_228	15	0.227957	HBSER5	Serotonergic neurons, hindbrain
M147	lavenderblush_54	18	0.229139	DEGLU5	Excitatory neurons, midbrain
M148	chartreuse_144	18	0.229399	HBGLU5	Excitatory neurons, hindbrain
M149	gold_302	14	0.231783	HBSER5	Serotonergic neurons, hindbrain
M150	darkseagreen_161	24	0.232691	HBGLU5	Excitatory neurons, hindbrain
M151	sandybrown_498	10	0.233497	TEGLU19	Excitatory neurons, cerebral cortex
M152	lightsteelblue_68	86	0.235809	DEGLU5	Excitatory neurons, midbrain
M153	linen_329	28	0.24067	MEGLU1	Excitatory neurons, midbrain
M154	darkred_288	29	0.240971	HBSER5	Serotonergic neurons, hindbrain
M155	firebrick_555	106	0.241013	TEINH12	Non-border Cck interneurons, cortex/hippocampus
M156	forestgreen_299	27	0.245426	HBSER5	Serotonergic neurons, hindbrain
M157	whitesmoke_256	30	0.24719	HBSER5	Serotonergic neurons, hindbrain
M158	darkolivegreen_543	20	0.248003	TEINH1	Inhibitory neurons, pallidum
M159	gainsboro_300	19	0.248251	HBSER5	Serotonergic neurons, hindbrain
M160	paleturquoise_355	54	0.253138	MEGLU2	Excitatory neurons, midbrain
M161	paleturquoise_226	23	0.257632	HBSER5	Serotonergic neurons, hindbrain
M162	coral_17	93	0.257641	DEGLU4	Excitatory neurons, thalamus
M163	tan_120	112	0.257673	HBGLU2	Excitatory neurons, hindbrain
M164	violet_253	17	0.259897	HBSER5	Serotonergic neurons, hindbrain
M165	khaki_568	40	0.261042	TEINH12	Non-border Cck interneurons, cortex/hippocampus
M166	lightgoldenrod_60	30	0.26241	DEGLU5	Excitatory neurons, midbrain
M167	lightskyblue_324	43	0.265003	MEGLU1	Excitatory neurons, midbrain
M168	aliceblue_2	84	0.26684	DEGLU4	Excitatory neurons, thalamus
M169	yellowgreen_387	160	0.269183	MEGLU10	Excitatory neurons, midbrain
M170	mistyrose_472	67	0.271766	TEGLU17	Excitatory neurons, cerebral cortex
M171	mediumspringgreen_209	37	0.272266	HBSER5	Serotonergic neurons, hindbrain
M172	honeydew_306	19	0.272965	HBSER5	Serotonergic neurons, hindbrain
M173	chocolate_145	51	0.273626	HBGLU5	Excitatory neurons, hindbrain
M174	azure_392	32	0.274625	MEGLU10	Excitatory neurons, midbrain
M175	hotpink_436	31	0.274771	MEINH2	Inhibitory neurons, midbrain
M176	darkturquoise_163	23	0.275589	HBGLU5	Excitatory neurons, hindbrain
M177	turquoise_381	28	0.276989	MEGLU3	Excitatory neurons, midbrain
M178	violet_511	19	0.280278	TEGLU21	Excitatory neurons, hippocampus CA1
M179	darkmagenta_284	50	0.280278	HBSER5	Serotonergic neurons, hindbrain
M180	burlywood_400	35	0.280279	MEGLU10	Excitatory neurons, midbrain
M181	mintcream_342	160	0.282396	MEGLU1	Excitatory neurons, midbrain
M182	lightgoldenrodyellow_448	25	0.282635	MEINH2	Inhibitory neurons, midbrain
M183	floralwhite_40	19	0.284225	DEGLU4	Excitatory neurons, thalamus
M184	violetred_125	91	0.289093	HBGLU5	Excitatory neurons, hindbrain
M185	skyblue_502	16	0.291464	TEGLU19	Excitatory neurons, cerebral cortex
M186	floralwhite_298	26	0.293641	HBSER5	Serotonergic neurons, hindbrain
M187	darkorange_286	39	0.294011	HBSER5	Serotonergic neurons, hindbrain
M188	darkgoldenrod_281	24	0.295442	HBSER5	Serotonergic neurons, hindbrain
M189	lightgoldenrod_189	25	0.296335	HBSER5	Serotonergic neurons, hindbrain
M190	dodgerblue_425	24	0.29731	MEINH2	Inhibitory neurons, midbrain
M191	goldenrod_432	61	0.298942	MEINH2	Inhibitory neurons, midbrain
M192	white_517	11	0.300753	TEGLU21	Excitatory neurons, hippocampus CA1
M193	coral_275	51	0.301103	HBSER5	Serotonergic neurons, hindbrain
M194	peru_101	36	0.30188	HBGLU2	Excitatory neurons, hindbrain
M195	lightyellow_198	32	0.30375	HBSER5	Serotonergic neurons, hindbrain
M196	chocolate_403	29	0.30614	MEGLU10	Excitatory neurons, midbrain
M197	green_46	22	0.306911	DEGLU4	Excitatory neurons, thalamus
M198	gainsboro_171	14	0.309074	HBSER5	Serotonergic neurons, hindbrain
M199	tan_249	20	0.309309	HBSER5	Serotonergic neurons, hindbrain
M200	ghostwhite_43	24	0.313853	DEGLU4	Excitatory neurons, thalamus
M201	lightpink_192	19	0.314398	HBSER5	Serotonergic neurons, hindbrain
M202	mediumslateblue_208	28	0.31641	HBSER5	Serotonergic neurons, hindbrain
M203	darkturquoise_34	13	0.316796	DEGLU4	Excitatory neurons, thalamus
M204	darkolivegreen_27	18	0.320373	DEGLU4	Excitatory neurons, thalamus
M205	cornsilk_406	134	0.320588	MEGLU10	Excitatory neurons, midbrain
M206	mistyrose_214	19	0.322984	HBSER5	Serotonergic neurons, hindbrain
M207	yellowgreen_516	11	0.324831	TEGLU21	Excitatory neurons, hippocampus CA1
M208	sandybrown_240	20	0.325387	HBSER5	Serotonergic neurons, hindbrain
M209	mediumaquamarine_332	22	0.327399	MEGLU1	Excitatory neurons, midbrain
M210	rosybrown_107	24	0.328381	HBGLU2	Excitatory neurons, hindbrain
M211	lightgoldenrodyellow_319	26	0.328452	HBSER5	Serotonergic neurons, hindbrain
M212	dodgerblue_167	24	0.329013	HBGLU5	Excitatory neurons, hindbrain
M213	navyblue_218	14	0.331182	HBSER5	Serotonergic neurons, hindbrain
M214	steelblue_506	26	0.331779	TEGLU21	Excitatory neurons, hippocampus CA1
M215	whitesmoke_385	323	0.333418	MEGLU7	Excitatory neurons, midbrain
M216	bisque_394	19	0.33383	MEGLU10	Excitatory neurons, midbrain
M217	slateblue_245	28	0.340514	HBSER5	Serotonergic neurons, hindbrain
M218	lavender_311	18	0.341633	HBSER5	Serotonergic neurons, hindbrain
M219	darkviolet_551	17	0.342762	TEINH12	Non-border Cck interneurons, cortex/hippocampus
M220	blueviolet_140	78	0.343425	HBGLU5	Excitatory neurons, hindbrain
M221	moccasin_215	24	0.343579	HBSER5	Serotonergic neurons, hindbrain
M222	honeydew_177	133	0.345083	HBSER5	Serotonergic neurons, hindbrain
M223	deeppink_165	67	0.347776	HBGLU5	Excitatory neurons, hindbrain
M224	darksalmon_31	22	0.348279	DEGLU4	Excitatory neurons, thalamus
M225	navy_217	102	0.348671	HBSER5	Serotonergic neurons, hindbrain
M226	moccasin_86	75	0.350941	DEINH3	Inhibitory neurons, hypothalamus
M227	khaki_181	20	0.350998	HBSER5	Serotonergic neurons, hindbrain
M228	skyblue_373	43	0.351025	MEGLU3	Excitatory neurons, midbrain
M229	beige_6	52	0.351818	DEGLU4	Excitatory neurons, thalamus
M230	papayawhip_357	32	0.351833	MEGLU2	Excitatory neurons, midbrain
M231	green_175	30	0.352643	HBSER5	Serotonergic neurons, hindbrain
M232	turquoise_510	36	0.352919	TEGLU21	Excitatory neurons, hippocampus CA1
M233	mediumseagreen_465	36	0.353067	TEGLU4	Excitatory neurons, cerebral cortex
M234	yellow_257	19	0.354553	HBSER5	Serotonergic neurons, hindbrain
M235	darkkhaki_154	88	0.354652	HBGLU5	Excitatory neurons, hindbrain
M236	papayawhip_99	72	0.355197	HBGLU2	Excitatory neurons, hindbrain
M237	brown_270	32	0.356201	HBSER5	Serotonergic neurons, hindbrain
M238	darkviolet_293	19	0.361573	HBSER5	Serotonergic neurons, hindbrain
M239	navy_475	21	0.361999	TEGLU17	Excitatory neurons, cerebral cortex
M240	rosybrown_365	65	0.362705	MEGLU2	Excitatory neurons, midbrain
M241	white_1	14	0.364633	DEGLU4	Excitatory neurons, thalamus
M242	yellow_386	112	0.369167	MEGLU10	Excitatory neurons, midbrain
M243	darkkhaki_25	32	0.370512	DEGLU4	Excitatory neurons, thalamus
M244	blueviolet_269	30	0.370685	HBSER5	Serotonergic neurons, hindbrain
M245	red_106	34	0.37284	HBGLU2	Excitatory neurons, hindbrain
M246	mediumslateblue_466	52	0.375278	TEGLU4	Excitatory neurons, cerebral cortex
M247	darkcyan_409	64	0.37766	MEGLU11	Excitatory neurons, midbrain
M248	bisque_136	47	0.380718	HBGLU5	Excitatory neurons, hindbrain
M249	cadetblue_143	57	0.385046	HBGLU5	Excitatory neurons, hindbrain
M250	lightcyan_317	19	0.387433	HBSER5	Serotonergic neurons, hindbrain
M251	antiquewhite_132	24	0.389095	HBGLU5	Excitatory neurons, hindbrain
M252	lightcoral_58	108	0.394987	DEGLU5	Excitatory neurons, midbrain
M253	darkgoldenrod_152	20	0.395725	HBGLU5	Excitatory neurons, hindbrain
M254	greenyellow_176	59	0.398068	HBSER5	Serotonergic neurons, hindbrain
M255	salmon_110	53	0.39886	HBGLU2	Excitatory neurons, hindbrain
M256	mediumseagreen_336	72	0.399285	MEGLU1	Excitatory neurons, midbrain
M257	red_235	41	0.401041	HBSER5	Serotonergic neurons, hindbrain
M258	lemonchiffon_56	25	0.404545	DEGLU5	Excitatory neurons, midbrain
M259	plum_490	110	0.404649	TEGLU17	Excitatory neurons, cerebral cortex
M260	olivedrab_91	38	0.408622	HBGLU2	Excitatory neurons, hindbrain
M261	ghostwhite_430	67	0.409343	MEINH2	Inhibitory neurons, midbrain
M262	linen_200	19	0.411762	HBSER5	Serotonergic neurons, hindbrain
M263	seagreen_241	27	0.412329	HBSER5	Serotonergic neurons, hindbrain
M264	black_266	16	0.412546	HBSER5	Serotonergic neurons, hindbrain
M265	black_137	37	0.416932	HBGLU5	Excitatory neurons, hindbrain
M266	tomato_251	25	0.418854	HBSER5	Serotonergic neurons, hindbrain
M267	chocolate_532	83	0.424086	TEGLU23	Excitatory neurons, hippocampus CA3
M268	mintcream_84	15	0.424712	DEINH3	Inhibitory neurons, hypothalamus
M269	blanchedalmond_267	21	0.425205	HBSER5	Serotonergic neurons, hindbrain
M270	darkturquoise_292	26	0.426315	HBSER5	Serotonergic neurons, hindbrain
M271	lightgoldenrodyellow_61	34	0.427813	DEGLU5	Excitatory neurons, midbrain
M272	sienna_501	32	0.428719	TEGLU19	Excitatory neurons, cerebral cortex
M273	darkmagenta_413	29	0.429693	MEGLU11	Excitatory neurons, midbrain
M274	midnightblue_212	17	0.429919	HBSER5	Serotonergic neurons, hindbrain
M275	mediumorchid_76	54	0.434234	DEINH3	Inhibitory neurons, hypothalamus
M276	khaki_439	91	0.43483	MEINH2	Inhibitory neurons, midbrain
M277	indianred_566	108	0.436112	TEINH12	Non-border Cck interneurons, cortex/hippocampus
M278	lawngreen_442	18	0.438303	MEINH2	Inhibitory neurons, midbrain
M279	lightskyblue_453	14	0.439623	MEINH3	Inhibitory neurons, midbrain
M280	orange_479	21	0.441708	TEGLU17	Excitatory neurons, cerebral cortex
M281	palevioletred_485	53	0.441783	TEGLU17	Excitatory neurons, cerebral cortex
M282	darkkhaki_283	15	0.443571	HBSER5	Serotonergic neurons, hindbrain
M283	greenyellow_305	15	0.446768	HBSER5	Serotonergic neurons, hindbrain
M284	bisque_523	57	0.447508	TEGLU23	Excitatory neurons, hippocampus CA3
M285	mediumturquoise_339	45	0.451202	MEGLU1	Excitatory neurons, midbrain
M286	gold_173	22	0.452615	HBSER5	Serotonergic neurons, hindbrain
M287	lightsalmon_322	195	0.453869	MEGLU1	Excitatory neurons, midbrain
M288	ghostwhite_172	20	0.457288	HBSER5	Serotonergic neurons, hindbrain
M289	navajowhite_87	37	0.459313	DEINH3	Inhibitory neurons, hypothalamus
M290	lightslateblue_196	36	0.459708	HBSER5	Serotonergic neurons, hindbrain
M291	darkorange_415	25	0.460463	MEGLU11	Excitatory neurons, midbrain
M292	aquamarine_4	116	0.460704	DEGLU4	Excitatory neurons, thalamus
M293	mediumturquoise_81	25	0.463686	DEINH3	Inhibitory neurons, hypothalamus
M294	bisque_265	35	0.463905	HBSER5	Serotonergic neurons, hindbrain
M295	palegreen_225	20	0.464674	HBSER5	Serotonergic neurons, hindbrain
M296	purple_105	54	0.467342	HBGLU2	Excitatory neurons, hindbrain
M297	blanchedalmond_9	18	0.467799	DEGLU4	Excitatory neurons, thalamus
M298	cornflowerblue_276	16	0.469371	HBSER5	Serotonergic neurons, hindbrain
M299	lightslateblue_67	87	0.472041	DEGLU5	Excitatory neurons, midbrain
M300	mediumturquoise_210	25	0.475734	HBSER5	Serotonergic neurons, hindbrain
M301	orange_221	41	0.476436	HBSER5	Serotonergic neurons, hindbrain
M302	ivory_438	95	0.481707	MEINH2	Inhibitory neurons, midbrain
M303	mediumpurple_464	63	0.482087	TEGLU4	Excitatory neurons, cerebral cortex
M304	lightblue_57	18	0.482779	DEGLU5	Excitatory neurons, midbrain
M305	lavender_440	100	0.484352	MEINH2	Inhibitory neurons, midbrain
M306	brown_12	16	0.486004	DEGLU4	Excitatory neurons, thalamus
M307	darkgoldenrod_23	38	0.486317	DEGLU4	Excitatory neurons, thalamus
M308	cadetblue_14	15	0.489599	DEGLU4	Excitatory neurons, thalamus
M309	oldlace_219	14	0.48986	HBSER5	Serotonergic neurons, hindbrain
M310	rosybrown_494	10	0.48992	TEGLU19	Excitatory neurons, cerebral cortex
M311	cornflowerblue_534	108	0.490377	TEGLU23	Excitatory neurons, hippocampus CA3
M312	chartreuse_273	23	0.493289	HBSER5	Serotonergic neurons, hindbrain
M313	olivedrab_349	17	0.494934	MEGLU2	Excitatory neurons, midbrain
M314	powderblue_491	27	0.494991	TEGLU19	Excitatory neurons, cerebral cortex
M315	darkolivegreen_414	27	0.497217	MEGLU11	Excitatory neurons, midbrain
M316	skyblue_244	27	0.499578	HBSER5	Serotonergic neurons, hindbrain
M317	mediumvioletred_340	51	0.501318	MEGLU1	Excitatory neurons, midbrain
M318	goldenrod_561	58	0.505776	TEINH12	Non-border Cck interneurons, cortex/hippocampus
M319	ivory_51	124	0.50874	DEGLU5	Excitatory neurons, midbrain
M320	lightyellow_327	128	0.508856	MEGLU1	Excitatory neurons, midbrain
M321	darkturquoise_550	21	0.509082	TEINH12	Non-border Cck interneurons, cortex/hippocampus
M322	darkgoldenrod_410	27	0.511285	MEGLU11	Excitatory neurons, midbrain
M323	brown_528	24	0.511288	TEGLU23	Excitatory neurons, hippocampus CA3
M324	orangered_222	21	0.517027	HBSER5	Serotonergic neurons, hindbrain
M325	burlywood_142	17	0.51893	HBGLU5	Excitatory neurons, hindbrain
M326	azure_134	32	0.520623	HBGLU5	Excitatory neurons, hindbrain
M327	chocolate_16	16	0.525941	DEGLU4	Excitatory neurons, thalamus
M328	tomato_380	27	0.526598	MEGLU3	Excitatory neurons, midbrain
M329	mediumblue_75	28	0.52757	DEINH3	Inhibitory neurons, hypothalamus
M330	lavender_569	46	0.528716	TEINH12	Non-border Cck interneurons, cortex/hippocampus
M331	tomato_122	25	0.528933	HBGLU2	Excitatory neurons, hindbrain
M332	lightgreen_191	21	0.529525	HBSER5	Serotonergic neurons, hindbrain
M333	plum_361	104	0.543107	MEGLU2	Excitatory neurons, midbrain
M334	maroon_460	14	0.545162	MEINH3	Inhibitory neurons, midbrain
M335	green_304	48	0.548325	HBSER5	Serotonergic neurons, hindbrain
M336	midnightblue_341	187	0.550054	MEGLU1	Excitatory neurons, midbrain
M337	peru_230	23	0.5503	HBSER5	Serotonergic neurons, hindbrain
M338	darkblue_408	108	0.555084	MEGLU11	Excitatory neurons, midbrain
M339	purple_234	26	0.558461	HBSER5	Serotonergic neurons, hindbrain
M340	slateblue_374	26	0.562056	MEGLU3	Excitatory neurons, midbrain
M341	firebrick_168	30	0.562103	HBGLU5	Excitatory neurons, hindbrain
M342	white_130	46	0.563511	HBGLU5	Excitatory neurons, hindbrain
M343	snow_246	38	0.56783	HBSER5	Serotonergic neurons, hindbrain
M344	honeydew_564	58	0.569374	TEINH12	Non-border Cck interneurons, cortex/hippocampus
M345	mintcream_213	18	0.571072	HBSER5	Serotonergic neurons, hindbrain
M346	violetred_254	18	0.575179	HBSER5	Serotonergic neurons, hindbrain
M347	violetred_512	14	0.576784	TEGLU21	Excitatory neurons, hippocampus CA1
M348	mediumseagreen_207	23	0.579426	HBSER5	Serotonergic neurons, hindbrain
M349	indianred_50	104	0.580739	DEGLU5	Excitatory neurons, midbrain
M350	burlywood_529	15	0.584326	TEGLU23	Excitatory neurons, hippocampus CA3
M351	maroon_73	106	0.585703	DEGLU5	Excitatory neurons, midbrain
M352	lightblue_315	32	0.58666	HBSER5	Serotonergic neurons, hindbrain
M353	navy_346	61	0.587082	MEGLU2	Excitatory neurons, midbrain
M354	orangered_480	15	0.590944	TEGLU17	Excitatory neurons, cerebral cortex
M355	cyan_536	54	0.591078	TEGLU23	Excitatory neurons, hippocampus CA3
M356	whitesmoke_514	20	0.594165	TEGLU21	Excitatory neurons, hippocampus CA1
M357	wheat_384	215	0.594683	MEGLU7	Excitatory neurons, midbrain
M358	sienna_243	21	0.596637	HBSER5	Serotonergic neurons, hindbrain
M359	limegreen_457	31	0.59749	MEINH3	Inhibitory neurons, midbrain
M360	springgreen_505	51	0.598411	TEGLU19	Excitatory neurons, cerebral cortex
M361	palegoldenrod_353	80	0.601118	MEGLU2	Excitatory neurons, midbrain
M362	aquamarine_133	24	0.602257	HBGLU5	Excitatory neurons, hindbrain
M363	lightskyblue_66	12	0.603514	DEGLU5	Excitatory neurons, midbrain
M364	pink_360	11	0.603874	MEGLU2	Excitatory neurons, midbrain
M365	lightpink_63	29	0.60473	DEGLU5	Excitatory neurons, midbrain
M366	sandybrown_369	36	0.607052	MEGLU3	Excitatory neurons, midbrain
M367	gold_44	60	0.616569	DEGLU4	Excitatory neurons, thalamus
M368	greenyellow_434	86	0.619951	MEINH2	Inhibitory neurons, midbrain
M369	darksalmon_547	275	0.622096	TEINH12	Non-border Cck interneurons, cortex/hippocampus
M370	maroon_331	24	0.624112	MEGLU1	Excitatory neurons, midbrain
M371	greenyellow_47	26	0.627041	DEGLU4	Excitatory neurons, thalamus
M372	mistyrose_343	111	0.628132	MEGLU2	Excitatory neurons, midbrain
M373	deeppink_294	30	0.62897	HBSER5	Serotonergic neurons, hindbrain
M374	cornsilk_277	22	0.629808	HBSER5	Serotonergic neurons, hindbrain
M375	orchid_94	20	0.63136	HBGLU2	Excitatory neurons, hindbrain
M376	green_433	45	0.636541	MEINH2	Inhibitory neurons, midbrain
M377	aliceblue_389	24	0.640216	MEGLU10	Excitatory neurons, midbrain
M378	lightgreen_449	115	0.644599	MEINH2	Inhibitory neurons, midbrain
M379	deeppink_423	37	0.648048	MEINH2	Inhibitory neurons, midbrain
M380	saddlebrown_109	57	0.6505	HBGLU2	Excitatory neurons, hindbrain
M381	saddlebrown_238	16	0.65088	HBSER5	Serotonergic neurons, hindbrain
M382	darkslateblue_291	24	0.651901	HBSER5	Serotonergic neurons, hindbrain
M383	darkmagenta_155	22	0.6522	HBGLU5	Excitatory neurons, hindbrain
M384	lemonchiffon_185	31	0.656446	HBSER5	Serotonergic neurons, hindbrain
M385	brown_141	58	0.657914	HBGLU5	Excitatory neurons, hindbrain
M386	darkkhaki_412	29	0.660886	MEGLU11	Excitatory neurons, midbrain
M387	blue_526	37	0.661589	TEGLU23	Excitatory neurons, hippocampus CA3
M388	aquamarine_520	98	0.665102	TEGLU23	Excitatory neurons, hippocampus CA3
M389	yellowgreen_258	42	0.665529	HBSER5	Serotonergic neurons, hindbrain
M390	mediumslateblue_79	17	0.665743	DEINH3	Inhibitory neurons, hypothalamus
M391	darkgreen_24	19	0.668003	DEGLU4	Excitatory neurons, thalamus
M392	deepskyblue_424	31	0.668363	MEINH2	Inhibitory neurons, midbrain
M393	red_493	68	0.670072	TEGLU19	Excitatory neurons, cerebral cortex
M394	deepskyblue_553	22	0.674672	TEINH12	Non-border Cck interneurons, cortex/hippocampus
M395	lightcoral_445	17	0.675319	MEINH2	Inhibitory neurons, midbrain
M396	violet_124	15	0.676074	HBGLU5	Excitatory neurons, hindbrain
M397	mediumorchid_205	20	0.678708	HBSER5	Serotonergic neurons, hindbrain
M398	plum_103	35	0.67882	HBGLU2	Excitatory neurons, hindbrain
M399	lightseagreen_65	45	0.6792	DEGLU5	Excitatory neurons, midbrain
M400	darkgreen_411	22	0.682789	MEGLU11	Excitatory neurons, midbrain
M401	lavenderblush_312	15	0.686894	HBSER5	Serotonergic neurons, hindbrain
M402	darkcyan_538	177	0.687037	TEGLU23	Excitatory neurons, hippocampus CA3
M403	midnightblue_470	130	0.691962	TEGLU4	Excitatory neurons, cerebral cortex
M404	lightgoldenrod_318	20	0.695304	HBSER5	Serotonergic neurons, hindbrain
M405	sienna_114	40	0.697132	HBGLU2	Excitatory neurons, hindbrain
M406	darkblue_21	38	0.697525	DEGLU4	Excitatory neurons, thalamus
M407	lemonchiffon_314	31	0.700181	HBSER5	Serotonergic neurons, hindbrain
M408	seagreen_499	30	0.702736	TEGLU19	Excitatory neurons, cerebral cortex
M409	purple_363	132	0.70461	MEGLU2	Excitatory neurons, midbrain
M410	oldlace_348	22	0.710477	MEGLU2	Excitatory neurons, midbrain
M411	steelblue_119	43	0.712309	HBGLU2	Excitatory neurons, hindbrain
M412	cyan_20	17	0.716367	DEGLU4	Excitatory neurons, thalamus
M413	darkred_159	28	0.720942	HBGLU5	Excitatory neurons, hindbrain
M414	azure_521	392	0.721305	TEGLU23	Excitatory neurons, hippocampus CA3
M415	yellow_128	16	0.725363	HBGLU5	Excitatory neurons, hindbrain
M416	darkcyan_22	14	0.725726	DEGLU4	Excitatory neurons, thalamus
M417	lawngreen_571	91	0.731662	TEINH12	Non-border Cck interneurons, cortex/hippocampus
M418	khaki_310	22	0.738505	HBSER5	Serotonergic neurons, hindbrain
M419	azure_263	29	0.739208	HBSER5	Serotonergic neurons, hindbrain
M420	lemonchiffon_443	61	0.740383	MEINH2	Inhibitory neurons, midbrain
M421	green_562	27	0.758946	TEINH12	Non-border Cck interneurons, cortex/hippocampus
M422	whitesmoke_127	162	0.772752	HBGLU5	Excitatory neurons, hindbrain
M423	powderblue_362	94	0.77405	MEGLU2	Excitatory neurons, midbrain
M424	ivory_309	25	0.77461	HBSER5	Serotonergic neurons, hindbrain
M425	chartreuse_15	26	0.775662	DEGLU4	Excitatory neurons, thalamus
M426	mintcream_471	43	0.775827	TEGLU4	Excitatory neurons, cerebral cortex
M427	cornsilk_148	81	0.776559	HBGLU5	Excitatory neurons, hindbrain
M428	ghostwhite_301	19	0.777853	HBSER5	Serotonergic neurons, hindbrain
M429	blueviolet_527	39	0.781798	TEGLU23	Excitatory neurons, hippocampus CA3
M430	limegreen_328	43	0.78659	MEGLU1	Excitatory neurons, midbrain
M431	navajowhite_474	127	0.792552	TEGLU17	Excitatory neurons, cerebral cortex
M432	mediumslateblue_337	134	0.794171	MEGLU1	Excitatory neurons, midbrain
M433	deepskyblue_37	30	0.796848	DEGLU4	Excitatory neurons, thalamus
M434	lightcyan_188	19	0.797231	HBSER5	Serotonergic neurons, hindbrain
M435	dodgerblue_296	36	0.797904	HBSER5	Serotonergic neurons, hindbrain
M436	darkcyan_280	29	0.800761	HBSER5	Serotonergic neurons, hindbrain
M437	dodgerblue_38	23	0.803089	DEGLU4	Excitatory neurons, thalamus
M438	red_364	29	0.803184	MEGLU2	Excitatory neurons, midbrain
M439	springgreen_247	46	0.804338	HBSER5	Serotonergic neurons, hindbrain
M440	orangered_351	26	0.81065	MEGLU2	Excitatory neurons, midbrain
M441	linen_458	12	0.811956	MEINH3	Inhibitory neurons, midbrain
M442	firebrick_297	26	0.815454	HBSER5	Serotonergic neurons, hindbrain
M443	beige_522	261	0.820823	TEGLU23	Excitatory neurons, hippocampus CA3
M444	forestgreen_41	26	0.823693	DEGLU4	Excitatory neurons, thalamus
M445	blue_10	23	0.824355	DEGLU4	Excitatory neurons, thalamus
M446	oldlace_90	78	0.825423	HBGLU2	Excitatory neurons, hindbrain
M447	thistle_121	18	0.827899	HBGLU2	Excitatory neurons, hindbrain
M448	royalblue_108	19	0.828853	HBGLU2	Excitatory neurons, hindbrain
M449	lavenderblush_183	15	0.830583	HBSER5	Serotonergic neurons, hindbrain
M450	darkred_30	18	0.830618	DEGLU4	Excitatory neurons, thalamus
M451	steelblue_377	30	0.842396	MEGLU3	Excitatory neurons, midbrain
M452	peru_488	22	0.849663	TEGLU17	Excitatory neurons, cerebral cortex
M453	peachpuff_229	20	0.85584	HBSER5	Serotonergic neurons, hindbrain
M454	firebrick_426	33	0.865718	MEINH2	Inhibitory neurons, midbrain
M455	darkseagreen_419	91	0.867757	MEINH2	Inhibitory neurons, midbrain
M456	beige_393	17	0.86813	MEGLU10	Excitatory neurons, midbrain
M457	mediumseagreen_78	34	0.873376	DEINH3	Inhibitory neurons, hypothalamus
M458	maroon_202	34	0.874441	HBSER5	Serotonergic neurons, hindbrain
M459	palegreen_96	26	0.875312	HBGLU2	Excitatory neurons, hindbrain
M460	aquamarine_262	22	0.880103	HBSER5	Serotonergic neurons, hindbrain
M461	darkseagreen_32	71	0.88584	DEGLU4	Excitatory neurons, thalamus
M462	palevioletred_98	30	0.886473	HBGLU2	Excitatory neurons, hindbrain
M463	cadetblue_401	113	0.887109	MEGLU10	Excitatory neurons, midbrain
M464	antiquewhite_390	15	0.889179	MEGLU10	Excitatory neurons, midbrain
M465	blanchedalmond_138	17	0.890463	HBGLU5	Excitatory neurons, hindbrain
M466	darkred_546	71	0.89215	TEINH12	Non-border Cck interneurons, cortex/hippocampus
M467	magenta_459	36	0.892892	MEINH3	Inhibitory neurons, midbrain
M468	coral_533	72	0.894071	TEGLU23	Excitatory neurons, hippocampus CA3
M469	black_395	17	0.895203	MEGLU10	Excitatory neurons, midbrain
M470	cornsilk_19	33	0.895533	DEGLU4	Excitatory neurons, thalamus
M471	firebrick_39	57	0.89606	DEGLU4	Excitatory neurons, thalamus
M472	navajowhite_216	31	0.901839	HBSER5	Serotonergic neurons, hindbrain
M473	darkviolet_422	72	0.904292	MEINH2	Inhibitory neurons, midbrain
M474	sandybrown_111	75	0.907624	HBGLU2	Excitatory neurons, hindbrain
M475	mediumspringgreen_467	16	0.909684	TEGLU4	Excitatory neurons, cerebral cortex
M476	darkseagreen_548	151	0.912242	TEINH12	Non-border Cck interneurons, cortex/hippocampus
M477	lawngreen_184	24	0.914204	HBSER5	Serotonergic neurons, hindbrain
M478	darkmagenta_542	32	0.917466	TEINH1	Inhibitory neurons, pallidum
M479	springgreen_118	23	0.918962	HBGLU2	Excitatory neurons, hindbrain
M480	mediumorchid_463	52	0.921123	MEINH3	Inhibitory neurons, midbrain
M481	slateblue_503	26	0.923484	TEGLU19	Excitatory neurons, cerebral cortex
M482	lightsteelblue_326	20	0.923547	MEGLU1	Excitatory neurons, midbrain
M483	lightsalmon_64	70	0.927606	DEGLU5	Excitatory neurons, midbrain
M484	peachpuff_487	23	0.928783	TEGLU17	Excitatory neurons, cerebral cortex
M485	greenyellow_563	11	0.928784	TEINH12	Non-border Cck interneurons, cortex/hippocampus
M486	lawngreen_55	14	0.929332	DEGLU5	Excitatory neurons, midbrain
M487	limegreen_70	34	0.930175	DEGLU5	Excitatory neurons, midbrain
M488	honeydew_48	106	0.930436	DEGLU4	Excitatory neurons, thalamus
M489	lightslateblue_325	12	0.932521	MEGLU1	Excitatory neurons, midbrain
M490	aliceblue_260	15	0.93255	HBSER5	Serotonergic neurons, hindbrain
M491	magenta_201	20	0.932841	HBSER5	Serotonergic neurons, hindbrain
M492	seagreen_112	30	0.935619	HBGLU2	Excitatory neurons, hindbrain
M493	navyblue_347	22	0.93688	MEGLU2	Excitatory neurons, midbrain
M494	darkorange_28	50	0.939248	DEGLU4	Excitatory neurons, thalamus
M495	mediumpurple_77	27	0.940974	DEINH3	Inhibitory neurons, hypothalamus
M496	darkorchid_287	16	0.94138	HBSER5	Serotonergic neurons, hindbrain
M497	pink_231	28	0.945362	HBSER5	Serotonergic neurons, hindbrain
M498	blanchedalmond_525	50	0.946879	TEGLU23	Excitatory neurons, hippocampus CA3
M499	lightseagreen_452	46	0.951133	MEINH3	Inhibitory neurons, midbrain
M500	darkcyan_151	22	0.952028	HBGLU5	Excitatory neurons, hindbrain
M501	olivedrab_220	47	0.952485	HBSER5	Serotonergic neurons, hindbrain
M502	brown_399	107	0.953004	MEGLU10	Excitatory neurons, midbrain
M503	burlywood_271	17	0.95326	HBSER5	Serotonergic neurons, hindbrain
M504	darkorchid_545	34	0.954617	TEINH1	Inhibitory neurons, pallidum
M505	palegreen_483	20	0.954759	TEGLU17	Excitatory neurons, cerebral cortex
M506	darkviolet_164	25	0.959789	HBGLU5	Excitatory neurons, hindbrain
M507	antiquewhite_519	40	0.960104	TEGLU21	Excitatory neurons, hippocampus CA1
M508	mediumvioletred_82	20	0.960243	DEINH3	Inhibitory neurons, hypothalamus
M509	darksalmon_160	57	0.960538	HBGLU5	Excitatory neurons, hindbrain
M510	mediumaquamarine_461	19	0.961131	MEINH3	Inhibitory neurons, midbrain
M511	darksalmon_418	33	0.961827	MEGLU11	Excitatory neurons, midbrain
M512	darkolivegreen_285	57	0.962213	HBSER5	Serotonergic neurons, hindbrain
M513	tan_507	65	0.96745	TEGLU21	Excitatory neurons, hippocampus CA1
M514	black_524	111	0.96781	TEGLU23	Excitatory neurons, hippocampus CA3
M515	darkslateblue_162	29	0.968006	HBGLU5	Excitatory neurons, hindbrain
M516	antiquewhite_261	20	0.96871	HBSER5	Serotonergic neurons, hindbrain
M517	saddlebrown_496	22	0.969652	TEGLU19	Excitatory neurons, cerebral cortex
M518	yellowgreen_129	63	0.970103	HBGLU5	Excitatory neurons, hindbrain
M519	slateblue_116	24	0.970476	HBGLU2	Excitatory neurons, hindbrain
M520	forestgreen_170	22	0.970864	HBGLU5	Excitatory neurons, hindbrain
M521	darkgreen_153	25	0.971792	HBGLU5	Excitatory neurons, hindbrain
M522	springgreen_376	16	0.973669	MEGLU3	Excitatory neurons, midbrain
M523	floralwhite_556	49	0.974502	TEINH12	Non-border Cck interneurons, cortex/hippocampus
M524	darkseagreen_290	18	0.976573	HBSER5	Serotonergic neurons, hindbrain
M525	mediumspringgreen_338	21	0.976807	MEGLU1	Excitatory neurons, midbrain
M526	chartreuse_531	47	0.978005	TEGLU23	Excitatory neurons, hippocampus CA3
M527	darkgreen_540	137	0.978579	TEINH1	Inhibitory neurons, pallidum
M528	blueviolet_398	19	0.980226	MEGLU10	Excitatory neurons, midbrain
M529	steelblue_248	16	0.980747	HBSER5	Serotonergic neurons, hindbrain
M530	cornflowerblue_147	53	0.982281	HBGLU5	Excitatory neurons, hindbrain
M531	hotpink_49	19	0.983182	DEGLU4	Excitatory neurons, thalamus
M532	orange_350	27	0.983397	MEGLU2	Excitatory neurons, midbrain
M533	lavender_182	102	0.984729	HBSER5	Serotonergic neurons, hindbrain
M534	indianred_437	15	0.986052	MEINH2	Inhibitory neurons, midbrain
M535	darkslateblue_549	29	0.986591	TEINH12	Non-border Cck interneurons, cortex/hippocampus
M536	cyan_278	23	0.986937	HBSER5	Serotonergic neurons, hindbrain
M537	deeppink_552	15	0.987041	TEINH12	Non-border Cck interneurons, cortex/hippocampus
M538	mediumturquoise_468	14	0.987759	TEGLU4	Excitatory neurons, cerebral cortex
M539	ivory_180	20	0.989702	HBSER5	Serotonergic neurons, hindbrain
M540	lightgreen_320	31	0.990043	HBSER5	Serotonergic neurons, hindbrain
M541	wheat_513	22	0.990414	TEGLU21	Excitatory neurons, hippocampus CA1
M542	lightblue_444	21	0.991444	MEINH2	Inhibitory neurons, midbrain
M543	lightcoral_187	20	0.992333	HBSER5	Serotonergic neurons, hindbrain
M544	mediumpurple_206	21	0.993063	HBSER5	Serotonergic neurons, hindbrain
M545	darksalmon_289	42	0.994053	HBSER5	Serotonergic neurons, hindbrain
M546	cyan_149	19	0.994346	HBGLU5	Excitatory neurons, hindbrain
M547	turquoise_123	104	0.995017	HBGLU2	Excitatory neurons, hindbrain
M548	lightgoldenrodyellow_190	26	0.995344	HBSER5	Serotonergic neurons, hindbrain
M549	forestgreen_557	25	0.995978	TEINH12	Non-border Cck interneurons, cortex/hippocampus
M550	indianred_179	15	0.996268	HBSER5	Serotonergic neurons, hindbrain
M551	lightblue_186	12	0.996309	HBSER5	Serotonergic neurons, hindbrain
M552	powderblue_104	31	0.997122	HBGLU2	Excitatory neurons, hindbrain
M553	turquoise_252	25	0.998108	HBSER5	Serotonergic neurons, hindbrain
M554	thistle_379	40	0.998294	MEGLU3	Excitatory neurons, midbrain
M555	hotpink_178	25	0.998506	HBSER5	Serotonergic neurons, hindbrain
M556	darkgreen_282	19	0.999023	HBSER5	Serotonergic neurons, hindbrain
M557	khaki_52	111	0.999484	DEGLU5	Excitatory neurons, midbrain
M558	gold_431	73	0.99964	MEINH2	Inhibitory neurons, midbrain
M559	darkslateblue_33	20	0.999656	DEGLU4	Excitatory neurons, thalamus
M560	ghostwhite_559	25	0.999715	TEINH12	Non-border Cck interneurons, cortex/hippocampus
M561	lightsalmon_193	14	0.999909	HBSER5	Serotonergic neurons, hindbrain
M562	mediumvioletred_211	19	0.99997	HBSER5	Serotonergic neurons, hindbrain
M563	skyblue_115	15	1	HBGLU2	Excitatory neurons, hindbrain
