# Supplementary material for: Genetic mapping of etiologic brain cell types for obesity
Source: eLife. 2020 Sep 21;9:e55851. doi: 10.7554/eLife.55851 (PMC7505664; doi:10.7554/eLife.55851)
Supplement: Figure 3—source data 6. [file elife-55851-fig3-data6.xlsx]

## Sheet: 9 - Module M1
Gene symbol	Ensembl Gene ID	kME	MAGMA ZSTAT
Foxp2	ENSG00000128573	0.72179	4.7052
Ndnf	ENSG00000173376	0.566754	-1.5647
Ntng1	ENSG00000162631	0.566019	5.5499
Pde1c	ENSG00000154678	0.507651	3.5608
Rgs4	ENSG00000117152	0.460316	1.5456
Id2	ENSG00000115738	0.449697	-1.1873
Gsg1l	ENSG00000169181	0.430394	-0.96423
Lef1	ENSG00000138795	0.419454	-0.23215
Nos1ap	ENSG00000198929	0.401967	0.37696
Plcb4	ENSG00000101333	0.376301	3.5876
Nxph1	ENSG00000122584	0.365348	0.51802
Htr1a	ENSG00000178394	0.361991	1.6167
Npas1	ENSG00000130751	0.360904	8.2912
Plch1	ENSG00000114805	0.355168	1.8505
Tfap2b	ENSG00000008196	0.352511	7.4552
Sox21	ENSG00000125285	0.342589	1.1118
Rabep1	ENSG00000029725	0.282438	4.1944
Rgs7bp	ENSG00000186479	0.274921	4.4455
B3glct	ENSG00000187676	0.274313	-2.3223
Bcl11a	ENSG00000119866	0.267728	2.1902
Npas3	ENSG00000151322	0.267122	2.9895
Arpp21	ENSG00000172995	0.260295	3.7888
Trpc3	ENSG00000138741	0.229204	0.28776
Pvrl3	ENSG00000177707	0.222324	-2.0468
Gtf2f1	ENSG00000125651	0.195766	0.054444
Amn	ENSG00000166126	0.189759	5.1942
Hlf	ENSG00000108924	0.178116	2.1013
Zfpm2	ENSG00000169946	0.16173	3.5716
Rims4	ENSG00000101098	0.13914	4.2699
Fdps	ENSG00000160752	0.10986	-0.8491
Zfp598	ENSG00000167962	0.104591	3.226
Rmnd5a	ENSG00000153561	0.0810101	2.7827
Tigd2	ENSG00000180346	0.0549711	-0.1647
