# Supplementary material for: Genetic mapping of etiologic brain cell types for obesity
Source: eLife. 2020 Sep 21;9:e55851. doi: 10.7554/eLife.55851 (PMC7505664; doi:10.7554/eLife.55851)
Supplement: Figure 3—source data 7. [file elife-55851-fig3-data7.xlsx]

## Sheet: 10 - MAGMA MNS
Annotation	P-value	Estimate	Std.error	FWER < 0.05
MEINH2	6.08253e-14	0.778311	0.10486	TRUE
MEGLU2	2.21327e-12	0.774488	0.111777	TRUE
TEGLU4	1.46996e-11	0.599815	0.0901311	TRUE
DEINH3	1.49679e-11	0.718318	0.107981	TRUE
MEGLU1	1.61229e-11	0.71394	0.107501	TRUE
SCINH2	1.63474e-11	1.01296	0.152571	TRUE
TEINH11	4.43729e-11	0.626644	0.0965559	TRUE
TEGLU10	1.73049e-10	0.577494	0.0919414	TRUE
MEINH3	1.83881e-10	0.697709	0.111248	TRUE
TEINH12	3.62946e-10	0.642107	0.10416	TRUE
MEGLU10	8.94486e-10	0.679415	0.112862	TRUE
DEGLU5	2.70109e-09	0.677206	0.116001	TRUE
MEINH13	2.73848e-09	0.752751	0.128992	TRUE
TEGLU24	5.9419e-09	0.509678	0.089342	TRUE
TEGLU11	5.99108e-09	0.516179	0.090504	TRUE
HBGLU3	8.12051e-09	0.68353	0.120952	TRUE
MEGLU11	9.76232e-09	0.629085	0.111948	TRUE
HBGLU5	9.94591e-09	0.602877	0.107346	TRUE
TEGLU23	1.42797e-08	0.520591	0.0937462	TRUE
TEINH1	3.7776e-08	0.613853	0.114092	TRUE
TEGLU8	4.73852e-08	0.470698	0.0881576	TRUE
TEINH16	5.07606e-08	0.542047	0.101759	TRUE
MEINH4	6.70528e-08	0.683419	0.129537	TRUE
SCINH7	7.0033e-08	0.776708	0.147443	TRUE
HBINH5	1.43803e-07	0.48884	0.0952182	TRUE
TEGLU21	1.46624e-07	0.575812	0.112239	TRUE
HBINH9	1.86485e-07	0.654742	0.128767	TRUE
TEINH19	2.53154e-07	0.497515	0.0989832	TRUE
MEGLU6	3.48953e-07	0.548286	0.110448	TRUE
MEGLU3	4.546e-07	0.671207	0.136631	TRUE
TEGLU2	5.18464e-07	0.500933	0.10251	TRUE
HBINH6	5.38853e-07	0.565056	0.115813	TRUE
TEINH20	6.41087e-07	0.559451	0.115479	TRUE
SCGLU2	6.72974e-07	0.755736	0.156307	TRUE
TEGLU18	7.89846e-07	0.460864	0.0959547	TRUE
TEINH9	9.36623e-07	0.568684	0.119255	TRUE
HBINH8	9.46743e-07	0.69299	0.145388	TRUE
TEINH18	9.719e-07	0.480718	0.100966	TRUE
TEGLU20	1.06029e-06	0.553566	0.116698	TRUE
TEINH13	1.13896e-06	0.524961	0.111008	TRUE
TEGLU19	1.21787e-06	0.562883	0.119371	TRUE
SCINH3	1.27461e-06	0.703821	0.149555	TRUE
TEGLU3	1.39167e-06	0.442123	0.0943074	TRUE
TEGLU9	2.25045e-06	0.502803	0.109577	TRUE
SCINH6	2.86338e-06	0.574337	0.126562	TRUE
SCINH8	3.39501e-06	0.62587	0.139024	TRUE
SCGLU3	3.42495e-06	0.64806	0.144013	TRUE
TEINH17	3.61166e-06	0.481744	0.107324	TRUE
HBINH2	4.2115e-06	0.567019	0.127254	TRUE
HBGLU2	4.26862e-06	0.464567	0.104329	TRUE
TEINH10	4.4679e-06	0.467831	0.105294	TRUE
SCINH10	5.30427e-06	0.704877	0.159982	TRUE
MEGLU9	5.68293e-06	0.510299	0.116215	TRUE
MBCHO1	6.73562e-06	0.528955	0.121491	TRUE
TEGLU17	1.04775e-05	0.397934	0.0935014	TRUE
SCGLU4	1.17841e-05	0.53571	0.12666	TRUE
TEINH15	1.19103e-05	0.418387	0.0989771	TRUE
HYPEP3	1.28521e-05	0.578232	0.13735	TRUE
TEGLU14	1.29035e-05	0.507951	0.120681	TRUE
HBCHO2	1.32436e-05	0.517015	0.123007	TRUE
TEINH4	1.71303e-05	0.513006	0.123781	TRUE
ENT9	1.74312e-05	0.386109	0.0932524	TRUE
TEGLU15	1.76406e-05	0.417049	0.100792	TRUE
MSN1	1.79023e-05	0.368086	0.0890313	TRUE
SCINH5	2.22145e-05	0.563316	0.137918	TRUE
DEINH2	2.31988e-05	0.502599	0.123357	TRUE
HBINH4	2.41414e-05	0.523879	0.128874	TRUE
HBSER3	2.686e-05	0.501356	0.124096	TRUE
DEGLU1	3.02849e-05	0.351276	0.0875606	TRUE
MEINH10	3.20002e-05	0.4036	0.100931	TRUE
MEINH12	3.85981e-05	0.618995	0.156545	TRUE
HBINH3	3.86882e-05	0.521485	0.131903	TRUE
TEINH3	4.52901e-05	0.536692	0.137063	TRUE
HBGLU6	4.58654e-05	0.373266	0.0954004	TRUE
MEGLU7	4.84128e-05	0.469381	0.120368	TRUE
CBGRC	5.21389e-05	0.532036	0.137069	TRUE
HBSER1	5.26599e-05	0.461117	0.118872	TRUE
TEGLU7	5.33792e-05	0.339907	0.0876997	TRUE
DEINH5	6.31653e-05	0.504061	0.131451	TRUE
MEGLU5	6.64397e-05	0.415247	0.108643	TRUE
DEINH1	6.92594e-05	0.437026	0.114649	TRUE
SCGLU1	7.10379e-05	0.645055	0.169503	TRUE
MEGLU8	7.26051e-05	0.451813	0.118893	TRUE
HBSER2	8.23491e-05	0.420441	0.111558	TRUE
TEGLU5	8.82935e-05	0.401512	0.107031	TRUE
MEGLU14	0.0001292	0.49854	0.13641	TRUE
DEGLU4	0.00013974	0.442602	0.121777	TRUE
OBNBL2	0.000152654	0.457457	0.126661	TRUE
OBINH5	0.000158311	0.531865	0.14765	TRUE
SCINH9	0.000167289	0.535396	0.149226	TRUE
HBGLU9	0.00021965	0.37353	0.106234	FALSE
MEINH6	0.000220773	0.475653	0.13533	FALSE
MEGLU4	0.000221596	0.425777	0.121174	FALSE
DGGRC1	0.000222783	0.369129	0.105095	FALSE
TEINH14	0.000250027	0.402765	0.115686	FALSE
TEINH5	0.000254324	0.425021	0.122239	FALSE
HBCHO3	0.000281564	0.365046	0.105824	FALSE
HBINH7	0.000287324	0.449872	0.130621	FALSE
MEINH7	0.000301976	0.472467	0.137721	FALSE
TEGLU13	0.000459507	0.353796	0.106728	FALSE
MSN2	0.000519265	0.301445	0.0918882	FALSE
TECHO	0.00066073	0.41518	0.129262	FALSE
OBNBL1	0.000986158	0.37873	0.12237	FALSE
TEGLU22	0.00100221	0.292082	0.0945202	FALSE
HBNOR	0.00100877	0.426029	0.137953	FALSE
TEINH7	0.00104654	0.429435	0.139551	FALSE
SCINH1	0.00115694	0.469751	0.154156	FALSE
HBSER5	0.00121	0.351049	0.115715	FALSE
DEGLU3	0.00122887	0.282994	0.0934269	FALSE
ENT8	0.00132267	0.331319	0.110192	FALSE
HBCHO4	0.0013514	0.368644	0.122873	FALSE
HYPEP1	0.00137064	0.384587	0.128372	FALSE
MEINH9	0.0016273	0.33221	0.112877	FALSE
HBGLU7	0.00164247	0.284431	0.0967372	FALSE
TEINH8	0.0018124	0.432121	0.148516	FALSE
TEINH21	0.00184371	0.340997	0.117414	FALSE
DEGLU2	0.00216771	0.290881	0.101951	FALSE
SCGLU5	0.00223903	0.35065	0.123346	FALSE
TEGLU12	0.00227369	0.290594	0.102397	FALSE
SCGLU7	0.00247853	0.45592	0.162234	FALSE
SCINH4	0.00261098	0.444367	0.159074	FALSE
SCGLU10	0.00349972	0.418413	0.155125	FALSE
MBDOP1	0.00375391	0.394832	0.147666	FALSE
HYPEP2	0.00441726	0.402301	0.153623	FALSE
TEGLU1	0.00513928	0.289973	0.112977	FALSE
DECHO1	0.00560148	0.278074	0.109623	FALSE
HBSER4	0.00674255	0.268583	0.108694	FALSE
TEINH6	0.00798774	0.342347	0.142066	FALSE
SEPNBL	0.00831856	0.399651	0.166874	FALSE
MEINH5	0.00958009	0.296939	0.126752	FALSE
MEINH8	0.0101801	0.347209	0.149665	FALSE
TEINH2	0.0102534	0.242483	0.104645	FALSE
OBDOP1	0.0109156	0.303496	0.132326	FALSE
OBNBL5	0.0111628	0.306716	0.134228	FALSE
DGGRC2	0.0130035	0.22284	0.100092	FALSE
HBGLU10	0.014906	0.295308	0.135911	FALSE
TEGLU6	0.0190651	0.218607	0.105421	FALSE
DEINH4	0.0216444	0.281077	0.139072	FALSE
SCGLU8	0.0220718	0.33548	0.166665	FALSE
CBINH2	0.0231032	0.309791	0.155386	FALSE
MBDOP2	0.023414	0.264688	0.133141	FALSE
MEINH14	0.0240779	0.35407	0.17917	FALSE
HBCHO1	0.0297166	0.264437	0.140275	FALSE
MEINH11	0.0315401	0.288827	0.155386	FALSE
TEGLU16	0.0393592	0.201439	0.114565	FALSE
PSNF2	0.0415791	0.197914	0.114218	FALSE
HBGLU8	0.0436672	0.22064	0.129048	FALSE
HBGLU4	0.0455428	0.237635	0.140628	FALSE
CBINH1	0.0506883	0.196706	0.120065	FALSE
PSPEP3	0.059716	0.163325	0.10488	FALSE
MSN3	0.0601676	0.154655	0.0995552	FALSE
DEINH6	0.0638375	0.261482	0.171641	FALSE
SCGLU6	0.0652515	0.204324	0.135116	FALSE
OBINH2	0.0664255	0.158251	0.105288	FALSE
PSPEP8	0.0671097	0.190419	0.127136	FALSE
HBGLU1	0.0726247	0.174571	0.119848	FALSE
PSNF3	0.0893996	0.156518	0.116411	FALSE
NFOL1	0.0905284	0.118359	0.0884875	FALSE
OBINH3	0.0988957	0.154674	0.120095	FALSE
HBADR	0.102825	0.160844	0.127082	FALSE
MSN4	0.105143	0.12101	0.0965888	FALSE
DEINH8	0.115827	0.197158	0.164825	FALSE
MEINH1	0.122129	0.178865	0.153603	FALSE
HYPEP5	0.123601	0.156803	0.1355	FALSE
OBINH4	0.128468	0.148968	0.131398	FALSE
DECHO2	0.131479	0.142296	0.12711	FALSE
MSN5	0.136834	0.125395	0.114548	FALSE
HYPEP7	0.139946	0.186713	0.172786	FALSE
PSNF1	0.141313	0.121428	0.113011	FALSE
SCGLU9	0.145105	0.148778	0.140662	FALSE
DGNBL2	0.148881	0.111912	0.107475	FALSE
SCINH11	0.154285	0.149059	0.146386	FALSE
DGNBL1	0.170979	0.121347	0.127689	FALSE
OBINH1	0.183526	0.120613	0.133711	FALSE
MFOL2	0.184969	0.079178	0.0883073	FALSE
PSNP1	0.18885	0.0821535	0.0931265	FALSE
PSPEP7	0.203762	0.102543	0.123801	FALSE
PSPEP1	0.232828	0.0823366	0.112854	FALSE
CBNBL2	0.239467	0.108313	0.152977	FALSE
DEINH7	0.24148	0.112824	0.160816	FALSE
CBNBL1	0.249974	0.0976008	0.144682	FALSE
NFOL2	0.291725	0.0539459	0.0983758	FALSE
HYPEP6	0.311448	0.0682295	0.138745	FALSE
HYPEP4	0.350834	0.0589334	0.153842	FALSE
ENT5	0.374611	0.0325222	0.101736	FALSE
PSNP6	0.404667	0.022712	0.0941276	FALSE
OBDOP2	0.441055	0.0193234	0.130303	FALSE
HYPEP8	0.444312	0.0212517	0.151746	FALSE
PSNP5	0.462007	0.00968071	0.101496	FALSE
MFOL1	0.468791	0.00656336	0.0838124	FALSE
CR	0.481559	0.00650102	0.140583	FALSE
PSPEP4	0.493279	0.00177061	0.105099	FALSE
PSPEP2	0.500544	-0.000139525	0.102307	FALSE
ENT1	0.510021	-0.00353451	0.140687	FALSE
OBNBL4	0.538739	-0.0152933	0.157244	FALSE
HBINH1	0.552126	-0.0206701	0.157742	FALSE
PSPEP6	0.554495	-0.0173086	0.126314	FALSE
COP2	0.56701	-0.0171429	0.101575	FALSE
MOL1	0.587583	-0.0214745	0.0970218	FALSE
ENT6	0.600983	-0.0274119	0.107121	FALSE
PSNP2	0.676782	-0.0486738	0.106106	FALSE
PSPEP5	0.69727	-0.0664739	0.128682	FALSE
PSNP3	0.717082	-0.0531041	0.0924823	FALSE
MSN6	0.717324	-0.0777673	0.135265	FALSE
ENT4	0.782151	-0.0747096	0.0958427	FALSE
CBPC	0.799934	-0.112557	0.133772	FALSE
OBNBL3	0.802692	-0.0961433	0.112937	FALSE
SZNBL	0.818726	-0.0857389	0.0941616	FALSE
ENT2	0.827134	-0.0958968	0.101701	FALSE
MOL2	0.850225	-0.095407	0.091964	FALSE
SYNOR1	0.883923	-0.132512	0.1109	FALSE
ACNT2	0.894483	-0.119078	0.095203	FALSE
SYCHO2	0.895098	-0.143188	0.11417	FALSE
ENT7	0.895116	-0.155453	0.12394	FALSE
ENT3	0.900339	-0.126061	0.0982131	FALSE
ACNT1	0.903634	-0.129478	0.0993995	FALSE
PSNP4	0.908603	-0.151203	0.113492	FALSE
DETPH	0.921588	-0.215701	0.152341	FALSE
MOL3	0.926651	-0.129116	0.0889611	FALSE
ACTE2	0.930328	-0.142739	0.0965542	FALSE
RGSZ	0.938476	-0.174493	0.113146	FALSE
COP1	0.939165	-0.14627	0.094496	FALSE
SYNOR4	0.945143	-0.163868	0.102444	FALSE
SYNOR3	0.946724	-0.153444	0.0950709	FALSE
SYNOR5	0.954411	-0.208298	0.123302	FALSE
SYNOR2	0.965977	-0.206893	0.113376	FALSE
SYCHO1	0.967056	-0.245972	0.133729	FALSE
ACOB	0.984915	-0.204031	0.0941069	FALSE
EPSC	0.98518	-0.192297	0.0884088	FALSE
SCHW	0.985738	-0.275111	0.125608	FALSE
ACTE1	0.986018	-0.21584	0.0981973	FALSE
ACBG	0.989176	-0.247474	0.10775	FALSE
OPC	0.989228	-0.214947	0.0935132	FALSE
VSMCA	0.993353	-0.250245	0.101064	FALSE
ENTG1	0.99392	-0.215426	0.0859023	FALSE
HYPEN	0.995266	-0.267465	0.103068	FALSE
ACMB	0.996036	-0.243981	0.0918773	FALSE
EPMB	0.997781	-0.3308	0.116248	FALSE
MGL2	0.997917	-0.276937	0.0966373	FALSE
SATG1	0.998556	-0.351167	0.117847	FALSE
OEC	0.998926	-0.297701	0.0969898	FALSE
MGL1	0.999443	-0.323224	0.0991282	FALSE
MGL3	0.999546	-0.31498	0.0949199	FALSE
SATG2	0.999651	-0.305639	0.0901308	FALSE
ENTG4	0.999726	-0.283834	0.0821151	FALSE
RGDG	0.999726	-0.416856	0.120578	FALSE
ABC	0.999792	-0.340751	0.0965212	FALSE
EPEN	0.999827	-0.270428	0.0755706	FALSE
ENTG5	0.999842	-0.306545	0.0850786	FALSE
ENTG6	0.999886	-0.319733	0.0867345	FALSE
PER3	0.999901	-0.417124	0.112017	FALSE
ENTG2	0.999964	-0.33253	0.083711	FALSE
ENTG7	0.999971	-0.338075	0.0840835	FALSE
CHOR	0.999981	-0.351682	0.0853305	FALSE
PER1	0.999987	-0.340416	0.080776	FALSE
VLMC1	0.999987	-0.432373	0.10257	FALSE
PVM1	0.999989	-0.409959	0.0967462	FALSE
PVM2	0.99999	-0.425826	0.0999111	FALSE
VECV	0.999991	-0.361189	0.0842585	FALSE
VECA	0.999996	-0.421309	0.0938781	FALSE
ENTG3	0.999997	-0.376788	0.0836891	FALSE
PER2	0.999997	-0.379497	0.0836021	FALSE
VLMC2	0.999998	-0.431711	0.0930565	FALSE
ENMFB	1	-0.527155	0.106435	FALSE
VECC	1	-0.491068	0.0882336	FALSE
