# Supplementary material for: Genetic mapping of etiologic brain cell types for obesity
Source: eLife. 2020 Sep 21;9:e55851. doi: 10.7554/eLife.55851 (PMC7505664; doi:10.7554/eLife.55851)
Supplement: Figure 4—source data 1. [file elife-55851-fig4-data1.xlsx]

## Sheet: 11 - MNS S-LDSC cond.
Annotation	Baseline	DEGLU4	DEGLU5	DEINH3	HBGLU2	HBGLU5	HBINH8	HBSER5	MEGLU1	MEGLU10	MEGLU11	MEGLU2	MEGLU3	MEGLU7	MEINH2	MEINH3	TEGLU17	TEGLU19	TEGLU21	TEGLU23	TEGLU4	TEINH1	TEINH12
DEINH3	1.17705e-06	0.000138761	0.10747	NA	0.00157296	0.000691081	3.83604e-05	0.000131809	0.00645196	0.000424088	0.00059819	0.00822186	0.000342747	9.30559e-05	0.0258861	0.00236449	4.91199e-05	2.2202e-05	0.000136614	3.5446e-05	0.000111031	0.000189222	0.000112454
MEGLU11	2.59169e-06	3.60912e-05	0.00981447	0.000391082	0.000968201	6.63713e-05	3.30675e-05	5.26265e-05	0.000506865	0.00129062	0.476663	0.0062123	0.000918348	0.000152715	0.00098034	0.00024073	6.41946e-05	3.81944e-05	0.000251593	2.8894e-05	0.00043658	0.000127247	2.40606e-05
MEINH2	8.11498e-06	0.00043082	0.046297	0.0176629	0.00234178	0.00199865	0.000193746	0.000457034	0.00591062	0.000738029	0.00290028	0.00404321	0.000821324	0.000424349	NA	0.00485066	0.000184251	4.91189e-05	0.000247792	0.000169772	0.000236609	0.000554667	0.000426968
MEGLU10	8.83146e-06	0.000203771	0.0364285	0.00222797	0.00398234	0.000406673	7.84713e-05	0.000338755	0.00258095	0.494438	0.0231341	0.0590703	0.00471507	0.000358328	0.00203261	0.00106375	0.000545811	0.000122884	0.000721929	0.000172455	0.000479409	0.000568206	0.000123876
DEGLU5	9.14384e-06	0.000365001	0.499435	0.00146266	0.000198927	0.0005917	8.27021e-05	0.000242252	0.00251615	0.000481392	0.00121897	0.00032521	0.000400814	0.000198036	0.00049968	0.00120456	0.00016418	3.79713e-05	6.60477e-05	9.1279e-05	4.36688e-05	0.000186486	0.000207428
MEGLU1	1.54074e-05	0.000813594	0.30353	0.0400334	0.0372622	0.00209296	0.000189839	0.000448008	NA	0.00415858	0.00803571	0.17196	0.0158633	0.000993208	0.0491883	0.0102412	0.000374002	0.000168232	0.00153469	0.000230931	0.00203218	0.00239934	0.000246991
MEGLU3	3.84801e-05	0.00137281	0.0579943	0.00394837	0.00343986	0.001329	0.000203658	0.000707768	0.014328	0.00775951	0.0101008	0.0267713	0.5	0.00139609	0.0050555	0.00440102	0.000642472	0.00029459	0.000488727	0.000386791	0.000475723	0.00125282	0.000541158
TEGLU23	4.05101e-05	0.000599003	0.007681	0.00215328	0.00224019	0.00127956	0.000217491	0.000551553	0.00127589	0.00176417	0.00144858	0.00753697	0.00106694	0.000941289	0.00320997	0.00218994	0.024965	0.00912899	0.0759567	NA	0.056373	0.00164434	0.00169308
DEGLU4	4.18573e-05	0.500534	0.181604	0.0142916	0.0148882	0.00232458	0.000450651	0.000956176	0.0106098	0.0030206	0.00341902	0.0354004	0.0100817	0.00142342	0.0204402	0.00843316	0.000660983	0.000615927	0.00563725	0.000755373	0.00652097	0.00543416	0.000741832
TEGLU19	4.5006e-05	0.000726734	0.00309615	0.00208198	0.000688836	0.000996048	0.000169071	0.000349372	0.00116506	0.00198006	0.00349032	0.0033396	0.00132417	0.000748205	0.000949139	0.00140189	0.0762748	0.5	0.12271	0.0134976	0.0402309	0.00129103	0.00115536
HBSER5	5.01534e-05	0.00096962	0.0457043	0.00935279	0.0780059	0.00148665	0.000460672	0.5	0.00423846	0.00497288	0.00456432	0.0347669	0.00367637	0.000718757	0.0157461	0.00861497	0.000557486	0.000390828	0.00219648	0.000654474	0.00147768	0.00579954	0.00139676
HBGLU2	5.36193e-05	0.0013854	0.0193806	0.00569508	NA	0.00203321	0.000753069	0.00545613	0.0144453	0.00350713	0.00565824	0.0040528	0.00201927	0.00148505	0.00644193	0.00871754	0.000975067	0.000206397	0.000253772	0.000540595	0.000186434	0.00145091	0.00134739
MEGLU2	7.44746e-05	0.00154133	0.0229685	0.0060477	0.00163156	0.00255369	0.000526823	0.00189172	0.0215195	0.00925622	0.00958236	NA	0.00359841	0.00231805	0.00408121	0.00669504	0.00138115	0.000372519	0.000534572	0.000836875	0.000256474	0.0012342	0.00103127
TEGLU17	8.56403e-05	0.000532139	0.00760471	0.00198591	0.00321633	0.000950251	0.000413802	0.000514127	0.00189908	0.00407889	0.00386126	0.00800688	0.00187514	0.00138964	0.00225271	0.00198858	NA	0.0191342	0.117564	0.00891132	0.111263	0.00172095	0.00107448
MEGLU7	9.13157e-05	0.00121461	0.0552475	0.00772377	0.0101787	0.00385963	0.00102717	0.000704512	0.00872558	0.00684559	0.0279803	0.0368714	0.00652285	NA	0.0148809	0.00380805	0.00168775	0.000747135	0.00213184	0.000990118	0.00644628	0.00129067	0.000538864
MEINH3	0.000101488	0.00295547	0.292366	0.0700291	0.0557933	0.00782442	0.000946033	0.00365725	0.0378789	0.00922797	0.0135272	0.107379	0.0159365	0.00256208	0.131719	0.499173	0.00176004	0.000937388	0.00448555	0.00149532	0.00417083	0.00827193	0.00231077
HBGLU5	0.000110504	0.0012546	0.0607258	0.0146599	0.00855816	0.495464	0.00115491	0.00104055	0.00771605	0.00284829	0.0036109	0.0185562	0.00370167	0.00273816	0.0239913	0.00801411	0.000918418	0.000705292	0.00242155	0.0010184	0.00452583	0.00442949	0.000931769
TEINH12	0.000111583	0.000892061	0.0213529	0.00676516	0.0066757	0.0012363	0.000432878	0.00132272	0.00212126	0.00152242	0.00182937	0.0072795	0.00219664	0.000630137	0.00915362	0.00346898	0.00157625	0.00116068	0.00335274	0.00182862	0.00655513	0.00411663	NA
TEINH1	0.000114149	0.0057484	0.321291	0.142225	0.0357796	0.0124364	0.00114508	0.00761495	0.0424777	0.0157142	0.0197126	0.066897	0.0160385	0.00255946	0.118692	0.0434435	0.00383254	0.00177492	0.00475623	0.00275839	0.00526106	NA	0.00780046
TEGLU4	0.000114284	0.00139181	0.00167175	0.00208265	0.000402134	0.00227753	0.000524713	0.000712055	0.002876	0.00144477	0.00395003	0.000523958	0.000679247	0.00206258	0.00182544	0.00190972	0.0321166	0.00269574	0.00483776	0.00644317	NA	0.000905852	0.00231958
TEGLU21	0.000115727	0.00151285	0.00248048	0.00242235	0.000619253	0.00162207	0.000433429	0.000976433	0.00279566	0.00232774	0.00328058	0.00156455	0.000887476	0.00114293	0.00183849	0.00247591	0.0367773	0.00556676	0.5	0.00956339	0.00628084	0.00107858	0.00147483
HBINH8	0.000159137	0.0011272	0.0133276	0.00708609	0.0102156	0.00351452	0.497735	0.00118207	0.0032578	0.00205491	0.00498723	0.00635186	0.00171038	0.00268319	0.0120464	0.00343911	0.000987136	0.000516934	0.00122115	0.000694956	0.00190848	0.00171317	0.000824769
DEINH5	0.000208413	0.00253189	0.0330596	0.0171325	0.00821326	0.00194528	0.0007541	0.00492614	0.0105086	0.0119919	0.00599634	0.0374611	0.00874951	0.00153967	0.00838727	0.0128742	0.00164988	0.000947376	0.00129253	0.0014286	0.00079644	0.00656535	0.00260853
HBGLU3	0.000224919	0.00180038	0.0537434	0.00755466	0.0887801	0.00182027	0.00220141	0.00461292	0.00865983	0.0107174	0.00801482	0.0458329	0.0115968	0.00364837	0.00927291	0.00773438	0.00164042	0.00112509	0.00399973	0.00123589	0.00265327	0.00444588	0.00145347
HBINH5	0.000233956	0.00405749	0.131654	0.0747711	0.184707	0.0142528	0.00364331	0.00947896	0.0418215	0.00561393	0.0133192	0.042781	0.00776642	0.0040362	0.114268	0.0298366	0.00231835	0.00102661	0.00410474	0.00241029	0.00396904	0.00943894	0.00448083
MEINH13	0.000300814	0.00331327	0.136022	0.0518795	0.0516171	0.00554931	0.00149151	0.00569051	0.021561	0.0217353	0.0100801	0.0998365	0.0200838	0.00302253	0.0685704	0.0325113	0.00159022	0.00175515	0.0054497	0.00194047	0.00292575	0.0127208	0.00313996
MEGLU8	0.000301591	0.00189105	0.0474877	0.00591986	0.0116504	0.00317648	0.00153879	0.00155018	0.00739727	0.0246049	0.0417262	0.0453232	0.0158316	0.0124485	0.00644053	0.00466746	0.00480379	0.00222461	0.00622164	0.00204148	0.00836087	0.00302969	0.0012472
HBINH3	0.000364159	0.00161401	0.0084766	0.00407134	0.00824048	0.00229399	0.00328457	0.00376201	0.00409116	0.00311865	0.00329434	0.00388571	0.0025634	0.00148721	0.00348471	0.0043677	0.00160258	0.000743138	0.00103064	0.00105937	0.000748011	0.00238905	0.00190001
HBINH9	0.00045696	0.00312361	0.0314392	0.00959903	0.0286916	0.00464449	0.0116395	0.00564591	0.0127857	0.00875732	0.0117826	0.0172009	0.00763897	0.00496596	0.0134507	0.0107585	0.00627065	0.00218424	0.00369301	0.00321544	0.00413329	0.00457689	0.00340537
HBCHO2	0.000600091	0.00659978	0.0702843	0.022282	0.0501184	0.035998	0.00717543	0.0175031	0.0236235	0.012215	0.0120209	0.0154472	0.00730232	0.00605992	0.0292329	0.0238328	0.00492443	0.00178766	0.00328536	0.00441517	0.00308323	0.00775707	0.00755445
HBNOR	0.000629806	0.00159192	0.00319496	0.00211662	0.00315283	0.00209153	0.002049	0.0045601	0.00272615	0.00394718	0.00422441	0.00199959	0.00226752	0.00205017	0.0025099	0.00284921	0.00170757	0.00103163	0.000930413	0.00128722	0.000963564	0.00176026	0.00228936
HBINH4	0.000658251	0.00499245	0.112739	0.0310013	0.10543	0.0155416	0.00828699	0.0134723	0.0201057	0.008195	0.00788075	0.0305939	0.0148863	0.00446368	0.0478008	0.022576	0.00227231	0.00154214	0.00471525	0.00240507	0.00582668	0.0111221	0.00442346
SCINH4	0.000752858	0.00296425	0.0259107	0.00754457	0.0123267	0.00609911	0.00792084	0.00317494	0.0116032	0.0121024	0.0100525	0.0349055	0.0134088	0.00721019	0.010702	0.0108568	0.00369293	0.00279882	0.00373255	0.00269129	0.00456531	0.00371875	0.00276614
MEINH4	0.000771679	0.00693545	0.0331927	0.0267312	0.00557792	0.00951157	0.00393756	0.00775097	0.0258292	0.0160976	0.0192698	0.0109829	0.00937278	0.0076302	0.0381289	0.0297056	0.00455061	0.00220342	0.00241304	0.00335406	0.00194153	0.0096389	0.00633696
TEGLU6	0.000962097	0.00414617	0.0428324	0.0136744	0.0120313	0.00805986	0.00301083	0.00296502	0.012755	0.0276933	0.0334638	0.0500225	0.0143125	0.0141376	0.017024	0.0126908	0.066935	0.0305844	0.150878	0.0236106	0.19207	0.00845886	0.0050121
SCINH2	0.000964392	0.00513765	0.0142034	0.010622	0.00419224	0.00692304	0.00645007	0.00398266	0.0190687	0.0079168	0.0111703	0.00572811	0.0069689	0.00874917	0.0114309	0.0113192	0.00496538	0.00228599	0.00199468	0.00333906	0.00233371	0.00495386	0.00493343
MSN1	0.0010063	0.00458378	0.01525	0.00927619	0.00683267	0.00841793	0.00308014	0.00349686	0.0104848	0.0173474	0.0272053	0.0312708	0.0118288	0.0283593	0.0121186	0.00922464	0.0545277	0.0183586	0.0372326	0.0202048	0.0826787	0.00767495	0.00498134
MEINH7	0.00104426	0.00868039	0.169481	0.048008	0.0302867	0.0174806	0.00648695	0.00663433	0.0261547	0.0160713	0.0326231	0.0511872	0.0179341	0.0114528	0.122306	0.0373484	0.00385953	0.00329352	0.0058935	0.00328243	0.0123608	0.0150084	0.00557217
TEINH11	0.00111245	0.0051735	0.0531333	0.0294459	0.0320969	0.00598264	0.00398341	0.0102705	0.0151518	0.0136636	0.0122312	0.0346451	0.013971	0.00581342	0.0442821	0.0236674	0.00822765	0.00727587	0.0149375	0.0108308	0.0242741	0.0210957	0.163739
TEGLU10	0.00117611	0.00969358	0.0542939	0.0327244	0.0314739	0.0165157	0.0050228	0.00698649	0.0150714	0.0162375	0.0222704	0.03803	0.00981626	0.00936262	0.0300465	0.0181232	0.166475	0.0705858	0.444211	0.0525844	0.427805	0.0116169	0.0105311
TEINH15	0.00119004	0.00469612	0.0221225	0.0125287	0.0092882	0.0082452	0.00560096	0.00404852	0.00776815	0.0072672	0.0103985	0.0124413	0.00636646	0.0076408	0.0179679	0.0100298	0.0105109	0.0114868	0.0154434	0.00965626	0.0293096	0.00870352	0.0297463
HBINH7	0.00135827	0.0101565	0.119746	0.0854903	0.104222	0.0267508	0.0164615	0.0148942	0.0481663	0.0115554	0.0297352	0.0421208	0.0253683	0.0172572	0.14513	0.036792	0.00536176	0.00329635	0.0100835	0.00491246	0.0187531	0.0204792	0.00677915
MEINH9	0.00143733	0.00837557	0.078718	0.0273134	0.0229523	0.0151007	0.0059419	0.00875668	0.0271113	0.0197921	0.060935	0.0302109	0.0214772	0.0137014	0.0599374	0.0287205	0.00743436	0.00418169	0.00547854	0.00604788	0.00962401	0.0113113	0.00888632
HBGLU9	0.00153321	0.017213	0.276288	0.120607	0.207521	0.0556705	0.0204155	0.0229629	0.0978551	0.0174854	0.0738899	0.0778134	0.0312043	0.0297433	0.217659	0.038582	0.00655116	0.00488367	0.0157487	0.00725089	0.0196358	0.0228249	0.0113245
SCINH8	0.00156731	0.00310927	0.0115161	0.00552048	0.00829897	0.00539877	0.0103795	0.00584311	0.00715667	0.0193129	0.0126679	0.0202756	0.00935958	0.00620253	0.00680397	0.0087527	0.00592607	0.00581286	0.00788435	0.00605	0.00472062	0.00534924	0.00362727
TEGLU5	0.00159413	0.00902172	0.0767958	0.0280061	0.018529	0.0112191	0.0059048	0.00645184	0.0169462	0.0288387	0.0472836	0.059993	0.0173295	0.0135378	0.023131	0.0165329	0.122774	0.0595929	0.312565	0.0624989	0.290169	0.0125603	0.0116844
TECHO	0.001689	0.0210281	0.173339	0.102147	0.0613123	0.0327399	0.00705174	0.0286387	0.0445697	0.0331557	0.0347379	0.095958	0.0452877	0.0127395	0.0834947	0.0690226	0.0127736	0.0157957	0.0328126	0.0191712	0.0237731	0.0691431	0.0184294
HYPEP1	0.00173778	0.010438	0.109415	0.0353989	0.0529943	0.0153003	0.00452407	0.021684	0.0292348	0.0403775	0.0262977	0.138618	0.0387812	0.00735768	0.0288215	0.0355649	0.00512062	0.00538291	0.00804378	0.00609551	0.00716321	0.0250375	0.00788192
TEGLU24	0.00183817	0.0078	0.0167674	0.0136499	0.00516859	0.0160006	0.00467159	0.00583919	0.0121219	0.0128545	0.0220418	0.0132721	0.00697861	0.0138408	0.0101951	0.0130336	0.171171	0.0553444	0.133851	0.193608	0.154396	0.0100674	0.0174248
TEGLU9	0.00184987	0.0146732	0.0867835	0.0409764	0.031576	0.0232302	0.00752462	0.0072832	0.019076	0.0248619	0.050968	0.0753966	0.0168347	0.0156895	0.0306912	0.0198153	0.13814	0.0714797	0.380259	0.0476902	0.385131	0.015777	0.0140875
MEGLU9	0.00203036	0.0143638	0.287853	0.0563273	0.0883783	0.0209012	0.00728539	0.0171591	0.0736799	0.438477	0.328364	0.369328	0.11437	0.0838308	0.0668759	0.0488576	0.0210002	0.0160496	0.0314338	0.013683	0.0328062	0.0307813	0.00816678
OBNBL2	0.0020336	0.00376847	0.012912	0.011949	0.013407	0.00768867	0.00815754	0.00387835	0.00884693	0.00882275	0.0192881	0.0147494	0.00748284	0.009587	0.0171449	0.0104707	0.00771862	0.00648326	0.00668906	0.00482711	0.0134874	0.00766127	0.00579586
DGGRC2	0.00215663	0.00475641	0.0120779	0.00413235	0.00238456	0.00891932	0.00277704	0.00164847	0.00760545	0.0190001	0.0160626	0.0134231	0.00874882	0.0145897	0.00613846	0.00747778	0.135464	0.0528024	0.0915636	0.122465	0.0840397	0.00669428	0.00859028
TEGLU20	0.00225866	0.0146159	0.0546077	0.0298946	0.0336461	0.0205581	0.00561591	0.00861943	0.021085	0.0242767	0.0465529	0.0602472	0.0214609	0.0168543	0.03325	0.0259074	0.184491	0.175123	0.478348	0.0890462	0.355531	0.0192148	0.0155205
DGGRC1	0.00276083	0.00668848	0.0117657	0.00468545	0.00317584	0.0112002	0.00421089	0.00237024	0.00613626	0.0206589	0.0169635	0.017547	0.00917683	0.0143608	0.00660051	0.00686903	0.0786761	0.0366933	0.0708796	0.101848	0.0623132	0.00686196	0.0109609
HBINH2	0.00282375	0.0145637	0.161954	0.0802935	0.148903	0.0177937	0.0136517	0.0376126	0.0397034	0.0243155	0.0240741	0.115882	0.0319549	0.0143391	0.0822959	0.0595794	0.00986964	0.0109362	0.0245216	0.0120763	0.0163009	0.0445517	0.017541
TEINH17	0.00283508	0.0128746	0.0474625	0.0403181	0.011432	0.0263244	0.0107402	0.0110977	0.0321586	0.0151106	0.0354092	0.0166225	0.0127277	0.0143455	0.0587885	0.0277122	0.0160863	0.00899881	0.00994416	0.00860363	0.0116926	0.0226446	0.0437417
CBGRC	0.00284772	0.00474988	0.00822012	0.00595872	0.00745893	0.0193491	0.00795755	0.00249292	0.00647736	0.00639114	0.00857057	0.00848669	0.00766475	0.00886676	0.00817083	0.00496498	0.0063653	0.00502172	0.00593559	0.00713506	0.00646753	0.00305642	0.00412125
HBSER3	0.00288359	0.02555	0.200689	0.102812	0.181265	0.0282278	0.0143076	0.246075	0.079416	0.0597311	0.0376256	0.185902	0.0669658	0.0180487	0.149974	0.12203	0.0118753	0.0104984	0.0277633	0.0148682	0.0193322	0.0750772	0.0252483
HBCHO4	0.00290971	0.0172432	0.111944	0.0510337	0.0634806	0.0253787	0.01144	0.0312435	0.042431	0.0262001	0.0269846	0.0582373	0.0247362	0.0116954	0.0547945	0.0453846	0.0128606	0.00852405	0.0182784	0.011428	0.0157934	0.026973	0.0176169
TEGLU3	0.00303283	0.0167562	0.0593586	0.031465	0.0299142	0.0412909	0.00920591	0.0120664	0.0210921	0.0278619	0.0576813	0.0503464	0.0155004	0.0258094	0.0330898	0.0244766	0.214492	0.116687	0.353348	0.103203	0.39012	0.0193143	0.0165051
TEINH4	0.00318031	0.00918183	0.0495306	0.0257109	0.0135067	0.00957737	0.00745894	0.00686569	0.0144999	0.0284293	0.0249573	0.0382137	0.0253808	0.00890018	0.0253623	0.0207963	0.0125967	0.0156913	0.018428	0.0136641	0.0225033	0.0194221	0.0941763
HBCHO3	0.00326983	0.0173235	0.0643609	0.0465062	0.0785436	0.0242956	0.0108819	0.0623815	0.0481527	0.0295561	0.0288806	0.0374642	0.022405	0.0145547	0.0455889	0.0460846	0.0153138	0.0089026	0.0123146	0.0149703	0.0112933	0.0268691	0.0206927
SCINH10	0.00383604	0.0141328	0.0748762	0.0303418	0.0544957	0.0246564	0.0263154	0.0177982	0.0375881	0.0581088	0.0749837	0.0686349	0.0566911	0.028883	0.0299342	0.0360338	0.0223257	0.0170099	0.0211044	0.0187707	0.0195196	0.024517	0.00912088
TEGLU13	0.00416106	0.0203132	0.0869118	0.0378881	0.0275707	0.0236625	0.0111696	0.0136345	0.0289323	0.0533533	0.0495345	0.0707036	0.0238194	0.0310022	0.0358754	0.0288282	0.252813	0.0949117	0.389657	0.144169	0.32719	0.0260171	0.0281571
DEGLU1	0.00427169	0.0897142	0.338535	0.178153	0.116678	0.0739005	0.0147914	0.0225909	0.111123	0.0618141	0.147863	0.178748	0.0783002	0.0355101	0.198095	0.0846707	0.0684922	0.041893	0.139081	0.0559887	0.176644	0.0676253	0.0355587
MEGLU4	0.00450818	0.0237968	0.196689	0.0420076	0.0600314	0.0224102	0.0143309	0.0151004	0.0661081	0.070034	0.0855705	0.154075	0.0860065	0.0327379	0.0587634	0.0400228	0.0345892	0.0230974	0.0506261	0.0225474	0.0454624	0.0262874	0.016317
TEGLU15	0.00467151	0.0217811	0.123318	0.0770213	0.0741134	0.0447873	0.015806	0.022722	0.0470577	0.0543991	0.08215	0.102634	0.0369448	0.0274856	0.0734519	0.0487606	0.360268	0.100343	0.356418	0.102856	0.3715	0.0487921	0.0340614
TEINH3	0.00553724	0.0191723	0.0476114	0.049012	0.0216758	0.0213516	0.014945	0.0311496	0.0333725	0.0368709	0.03952	0.0295317	0.0227626	0.02113	0.0354894	0.0408603	0.0157574	0.0111741	0.0109747	0.0150765	0.0112882	0.0269191	0.0227926
DEINH4	0.00567239	0.0474633	0.387872	0.147188	0.137482	0.0467801	0.0173659	0.0621605	0.0973567	0.194685	0.105766	0.297951	0.169746	0.0569479	0.13874	0.131672	0.0258655	0.0291879	0.0459767	0.0266577	0.0516148	0.120545	0.036574
OBINH5	0.00613772	0.00981834	0.0335497	0.0355808	0.0158254	0.0162614	0.022457	0.00901148	0.0196143	0.0161118	0.0181092	0.0202527	0.0135614	0.0195082	0.0441173	0.0222825	0.007222	0.00969794	0.00860804	0.00884759	0.0122536	0.0210628	0.0179326
TEGLU12	0.006197	0.0446094	0.161639	0.0852544	0.0828115	0.0367224	0.0190704	0.021335	0.0619795	0.05885	0.104884	0.148488	0.0614514	0.0501034	0.0817006	0.0654582	0.254254	0.160763	0.381603	0.166662	0.346674	0.0440411	0.030325
DECHO1	0.00650516	0.0668894	0.389392	0.282201	0.229486	0.0954802	0.0240534	0.106601	0.15081	0.112495	0.105886	0.253472	0.124813	0.0412325	0.264092	0.213387	0.0574074	0.0502472	0.110134	0.0759439	0.0797337	0.181531	0.0775368
SCGLU3	0.00747385	0.0281821	0.104339	0.049721	0.0369489	0.0349053	0.0219345	0.032438	0.0805375	0.0831557	0.0679633	0.120133	0.0701918	0.040728	0.0559514	0.0668099	0.0311167	0.0234593	0.0247849	0.0254806	0.0218927	0.0343378	0.0254664
DEINH6	0.00764788	0.0162535	0.0612692	0.0428833	0.0432188	0.0131395	0.0150658	0.0330922	0.0347836	0.0427398	0.0335645	0.0721511	0.0416827	0.020079	0.0367885	0.0414609	0.0116861	0.0130582	0.015299	0.00948804	0.0128308	0.0343662	0.0149108
MEINH12	0.00770294	0.0168784	0.037828	0.0302865	0.0147015	0.0200121	0.0149638	0.0169183	0.0313427	0.0313728	0.0353995	0.0221268	0.0223604	0.0202715	0.0388585	0.0349874	0.0154877	0.0123913	0.0119851	0.0145914	0.0119192	0.0218454	0.0200013
MBDOP1	0.00796327	0.0188089	0.0267827	0.0237684	0.0175575	0.0170199	0.0127055	0.0232305	0.028842	0.0268376	0.0204123	0.0255043	0.0221309	0.0154059	0.023008	0.0273393	0.0122887	0.0121887	0.0116409	0.0144055	0.00946365	0.0174927	0.0158578
TEGLU18	0.00802744	0.0311485	0.117607	0.0767634	0.0597042	0.0483394	0.0166449	0.024832	0.0542683	0.0750887	0.10329	0.0950884	0.051688	0.0569228	0.0593986	0.0537813	0.523722	0.303803	0.43268	0.149031	0.449698	0.0557191	0.038721
TEGLU11	0.00854557	0.036761	0.0979495	0.0679271	0.0666555	0.0530102	0.0190676	0.0310576	0.0528151	0.056809	0.0871853	0.106664	0.039541	0.0475992	0.0696715	0.0607666	0.442539	0.239016	0.589886	0.228922	0.555034	0.0537138	0.0565277
DEGLU3	0.00884738	0.172632	0.52115	0.26655	0.212778	0.104602	0.0289666	0.072076	0.205091	0.149345	0.191669	0.385451	0.152049	0.0598148	0.262661	0.181264	0.0873008	0.0817262	0.204199	0.0805552	0.161568	0.146742	0.0672377
HYPEP3	0.00889385	0.102967	0.693303	0.338183	0.369414	0.0860107	0.0316886	0.133919	0.310107	0.327758	0.179815	0.715942	0.319823	0.0680988	0.287139	0.286635	0.0587782	0.0597013	0.122826	0.0540707	0.089299	0.195407	0.0455047
MSN5	0.00923993	0.0336885	0.0616807	0.0473257	0.0348514	0.0269838	0.0222052	0.0217799	0.0476986	0.0750254	0.0934162	0.105297	0.0686951	0.0971998	0.0612473	0.0531239	0.134434	0.0618014	0.131575	0.076563	0.111452	0.0520477	0.0387815
MEGLU6	0.00925044	0.0663515	0.451691	0.167317	0.193906	0.0581629	0.0307113	0.0406036	0.185138	0.148372	0.229143	0.288705	0.190973	0.0857577	0.220473	0.1225	0.0925151	0.0607497	0.129153	0.060413	0.164789	0.0964787	0.042618
HBGLU1	0.00928468	0.0383541	0.129392	0.0997307	0.117405	0.0372016	0.029512	0.045087	0.0916409	0.0435454	0.0799574	0.0804578	0.0699993	0.0499123	0.0953557	0.0586978	0.0427	0.0348295	0.059131	0.0371061	0.051276	0.0605556	0.042334
TEGLU2	0.00929341	0.0655581	0.146362	0.0905958	0.10239	0.0769673	0.025828	0.0459503	0.0696171	0.0729143	0.140828	0.138309	0.0731033	0.0606897	0.111217	0.0821549	0.277158	0.234986	0.521042	0.19429	0.453947	0.0664002	0.0538568
HBGLU7	0.0095621	0.0597532	0.361518	0.237236	0.296504	0.636447	0.0714704	0.073096	0.170638	0.0605201	0.120988	0.182374	0.0678917	0.102413	0.272455	0.14766	0.0450234	0.032296	0.0879754	0.045761	0.100338	0.0870331	0.0528818
MEGLU14	0.00970269	0.0524441	0.396688	0.197917	0.210083	0.0931589	0.0328843	0.139173	0.177419	0.140294	0.0974758	0.36394	0.160659	0.0400442	0.181949	0.176327	0.0426658	0.0423509	0.0836106	0.0429494	0.0654411	0.115182	0.056713
TEINH5	0.00990252	0.0281791	0.111771	0.0603598	0.0381605	0.0270391	0.0197204	0.020166	0.0400551	0.0684438	0.0606451	0.0831057	0.0563229	0.0318058	0.0624437	0.0535231	0.030632	0.0339614	0.0465505	0.0306109	0.0452582	0.0481771	0.132852
ENT8	0.00992937	0.0204557	0.0313708	0.0249906	0.0373337	0.0257403	0.0224526	0.0500866	0.0322013	0.0354936	0.0310637	0.0336307	0.024908	0.0218649	0.0275689	0.0380635	0.0214995	0.0155583	0.0192057	0.0219986	0.0134132	0.0292288	0.0246738
HBSER2	0.0100741	0.0721236	0.397064	0.24522	0.52521	0.0772391	0.0414209	0.606077	0.161323	0.142914	0.119978	0.35227	0.136219	0.0627103	0.3131	0.254611	0.0538287	0.0416527	0.107224	0.056428	0.0762844	0.172014	0.0875946
MEINH6	0.01009	0.0532959	0.415292	0.244075	0.108887	0.0847941	0.0368269	0.0335895	0.150031	0.0860241	0.143351	0.194405	0.105245	0.0783229	0.310072	0.157092	0.0345185	0.0221243	0.0614426	0.0241743	0.0567207	0.0913087	0.0505968
HBINH6	0.0102181	0.035966	0.201181	0.141064	0.171492	0.0649078	0.0442502	0.0519136	0.0888909	0.0407338	0.0530461	0.10478	0.0565726	0.0270661	0.135878	0.101754	0.0283495	0.0222282	0.0465651	0.0321864	0.0388306	0.0716032	0.0398102
MBCHO1	0.0109777	0.0488478	0.316042	0.153016	0.120934	0.0847823	0.0369069	0.0438227	0.144027	0.094626	0.131345	0.202941	0.0861991	0.0749596	0.17513	0.100505	0.0510662	0.0370792	0.0695758	0.0437285	0.0694828	0.0681737	0.0445503
HBGLU6	0.0113356	0.0577513	0.374513	0.212577	0.305259	0.690171	0.0623305	0.0747036	0.149853	0.0733261	0.0992533	0.163976	0.0724301	0.0957532	0.238501	0.144612	0.0460988	0.0350711	0.0903142	0.0465924	0.110673	0.09878	0.0604401
OBNBL1	0.0118435	0.0378612	0.179377	0.107927	0.110362	0.0630377	0.0420583	0.044047	0.0965358	0.0890108	0.185699	0.134731	0.121486	0.0612594	0.14145	0.0931659	0.0702387	0.0481747	0.0860414	0.0364539	0.0901227	0.0805609	0.0331615
ENT9	0.0124963	0.0266852	0.0687354	0.0438886	0.0808404	0.0396837	0.0265343	0.0551012	0.0463553	0.0418126	0.0588601	0.0861484	0.0501982	0.0257664	0.052779	0.0632825	0.0329058	0.0244837	0.04043	0.0364469	0.0437455	0.0395674	0.0361977
SEPNBL	0.0128662	0.0441939	0.195592	0.0812632	0.0658407	0.0598735	0.0251702	0.0294699	0.0652553	0.0377236	0.0682658	0.0908566	0.0698211	0.0325647	0.0885848	0.0630848	0.0260453	0.0297687	0.0387492	0.0277349	0.0370936	0.0582019	0.0278777
TEINH18	0.0129946	0.0816015	0.333877	0.254872	0.114631	0.14502	0.0587857	0.0656226	0.181417	0.0783199	0.122436	0.18808	0.0936618	0.0720689	0.3541	0.169984	0.0937295	0.0682988	0.104451	0.0667845	0.125452	0.138411	0.194454
TEINH19	0.0130112	0.0976576	0.439727	0.305704	0.252196	0.120157	0.0614253	0.101899	0.233283	0.162809	0.152661	0.301817	0.141384	0.0870659	0.387754	0.250217	0.120531	0.0751561	0.136677	0.113594	0.192304	0.186814	0.27731
MSN4	0.0132764	0.0398742	0.0569205	0.0486933	0.0358055	0.0399459	0.0278212	0.0322935	0.059974	0.0945696	0.105153	0.0769577	0.0527554	0.105637	0.053374	0.0560949	0.246141	0.0994132	0.12218	0.117362	0.168653	0.057326	0.0491597
MSN2	0.013727	0.0393418	0.0810574	0.0606776	0.0525503	0.0553669	0.0333844	0.030961	0.0668336	0.104649	0.133058	0.127547	0.0736099	0.175292	0.0795331	0.0643568	0.229195	0.119046	0.169027	0.115335	0.282668	0.0604591	0.0479035
TEGLU8	0.0137859	0.0584793	0.189949	0.126777	0.0960044	0.100756	0.039436	0.0422386	0.0858879	0.125203	0.203887	0.188063	0.0738332	0.0724059	0.103163	0.0863585	0.627227	0.246971	0.580631	0.241243	0.565856	0.0687103	0.068885
TEINH13	0.0140822	0.0599657	0.238356	0.159439	0.120995	0.0635328	0.0364867	0.0527324	0.115782	0.0634277	0.0923513	0.126425	0.0667129	0.0475081	0.187522	0.122541	0.0763355	0.0543262	0.100808	0.0740621	0.135483	0.11336	0.471448
SCGLU1	0.0143539	0.0485529	0.299635	0.119365	0.198222	0.0787365	0.0450898	0.0580747	0.153689	0.141986	0.119027	0.300119	0.193757	0.0689736	0.117356	0.120988	0.035321	0.0403377	0.0377426	0.0410264	0.0480767	0.0749839	0.0421532
TEINH9	0.014859	0.0469658	0.164346	0.112318	0.0653586	0.0605436	0.0346749	0.0411596	0.0777089	0.0664447	0.0571211	0.0973012	0.0677803	0.0410744	0.126077	0.101268	0.0403777	0.0440725	0.0488587	0.052704	0.0697105	0.0898714	0.553308
MEGLU5	0.0150569	0.0723698	0.470291	0.168567	0.127849	0.0724133	0.0401103	0.0430339	0.205143	0.185608	0.231848	0.285307	0.173744	0.109977	0.217933	0.134217	0.0821509	0.0534141	0.108837	0.053336	0.113265	0.0958723	0.057695
MEINH11	0.0152652	0.0376585	0.200869	0.0943892	0.059852	0.05668	0.0375982	0.0407849	0.0756296	0.0796768	0.127489	0.114666	0.0825414	0.0536638	0.156266	0.0903969	0.0419876	0.0415682	0.051962	0.0365446	0.0733642	0.0782702	0.049772
MEINH10	0.0154603	0.0558408	0.265815	0.160486	0.0967561	0.0922501	0.0476483	0.0787511	0.124994	0.13777	0.207798	0.166559	0.0969948	0.0805433	0.21818	0.15255	0.0752491	0.0528822	0.0616377	0.0664126	0.062549	0.0986744	0.0748218
TEINH16	0.0154934	0.0454838	0.181421	0.122871	0.0930587	0.059703	0.0511892	0.0464171	0.0822843	0.0724582	0.116592	0.117706	0.0721614	0.0489374	0.149177	0.0969292	0.0931617	0.067564	0.0917002	0.0617703	0.133852	0.0971172	0.259099
HBADR	0.0162565	0.0685789	0.299034	0.163085	0.546737	0.0616267	0.0713703	0.22801	0.141289	0.175553	0.142754	0.26988	0.170591	0.071548	0.187217	0.163276	0.0481558	0.0368734	0.0556534	0.0417463	0.0574546	0.119899	0.0767
CBINH1	0.017489	0.0378935	0.146197	0.101323	0.0625373	0.0879447	0.0464599	0.0231656	0.0760672	0.0426961	0.0586835	0.0552225	0.0508796	0.0580391	0.156491	0.0754203	0.0361519	0.0289156	0.0306266	0.0306343	0.0565876	0.0644785	0.0494637
PSPEP1	0.0179516	0.0577026	0.14871	0.114961	0.111885	0.0872048	0.0554349	0.0766703	0.104593	0.057373	0.0720134	0.115957	0.0739882	0.0443816	0.110396	0.0987776	0.0443747	0.0417038	0.0623023	0.0578641	0.0629085	0.0767308	0.0593442
HBSER4	0.0180797	0.0712857	0.211587	0.144567	0.332172	0.0833236	0.056234	0.420997	0.135858	0.102856	0.0926357	0.178107	0.0981119	0.0619903	0.169802	0.178697	0.0611911	0.0362211	0.0549882	0.0543684	0.0517391	0.112347	0.0744357
DEINH1	0.0191893	0.143087	0.612879	0.469342	0.247443	0.23021	0.0999277	0.111824	0.277334	0.145395	0.270775	0.26245	0.179136	0.149113	0.568164	0.357026	0.0955597	0.0688799	0.119283	0.0685268	0.15608	0.250512	0.144229
TEGLU1	0.0203586	0.13037	0.284256	0.158853	0.128196	0.142658	0.0720513	0.0779332	0.145203	0.177106	0.207971	0.250263	0.126517	0.173323	0.164539	0.142173	0.251209	0.193688	0.429524	0.162982	0.471375	0.127853	0.0789284
TEGLU16	0.0205541	0.0806552	0.221646	0.121782	0.140727	0.0754664	0.0489005	0.0729863	0.115738	0.216662	0.223736	0.256481	0.128441	0.132456	0.132853	0.120976	0.691197	0.326028	0.630327	0.320873	0.549426	0.110963	0.0846456
HBGLU10	0.0208692	0.0856759	0.439549	0.132305	0.405439	0.0838919	0.0951297	0.116933	0.248319	0.232054	0.284395	0.311707	0.199062	0.161285	0.230558	0.158364	0.0759296	0.0708466	0.103187	0.0683403	0.121856	0.0994438	0.0500804
PSPEP3	0.0219949	0.0548071	0.109737	0.0976498	0.103581	0.0716416	0.0607136	0.0783313	0.0846863	0.0585939	0.0632719	0.109463	0.0738873	0.0468058	0.0805732	0.0779967	0.0403178	0.0382833	0.0627986	0.0499728	0.0525294	0.0709185	0.0533821
DEINH2	0.0225753	0.105358	0.349294	0.281193	0.0999922	0.162625	0.0854797	0.0866716	0.189347	0.0886183	0.131061	0.117932	0.0927572	0.104265	0.300037	0.204232	0.0693984	0.0469637	0.0660814	0.0584012	0.0670662	0.143413	0.108047
PSNF1	0.0232008	0.0918866	0.212181	0.180608	0.128884	0.127056	0.0619057	0.0970748	0.136984	0.067037	0.0982378	0.119265	0.106484	0.0712451	0.205934	0.128163	0.0551327	0.0521511	0.108917	0.065326	0.0988947	0.100288	0.0786245
HYPEP5	0.0232384	0.0583193	0.253915	0.110818	0.164118	0.0691118	0.0401147	0.113221	0.119474	0.157696	0.13481	0.211417	0.118627	0.0623134	0.121914	0.127158	0.0475482	0.0541217	0.0560419	0.0515657	0.0671241	0.112445	0.0664539
TEINH2	0.024352	0.106725	0.433363	0.325384	0.167607	0.110896	0.0555841	0.104025	0.23138	0.29542	0.221247	0.422097	0.182048	0.131654	0.268623	0.271315	0.228768	0.13336	0.197078	0.149441	0.180929	0.212623	0.119752
PSPEP2	0.0250378	0.0629553	0.147635	0.129255	0.133955	0.0921662	0.0601927	0.101523	0.125328	0.0757424	0.0767954	0.157849	0.0924803	0.0543136	0.128947	0.112161	0.0540591	0.0556682	0.0832336	0.0741638	0.0699832	0.0884749	0.0673821
DEINH7	0.0258983	0.0341108	0.0576787	0.0493865	0.0493711	0.0299925	0.0324595	0.0414755	0.0459806	0.0497556	0.0408099	0.0575418	0.0550292	0.0280826	0.0436492	0.0480081	0.0285467	0.0376189	0.0321273	0.0298719	0.0380569	0.046735	0.0363915
SCGLU4	0.0261686	0.0477133	0.112187	0.0713592	0.081287	0.0628962	0.0478567	0.0626266	0.100324	0.114903	0.109148	0.134516	0.0866762	0.0826627	0.0773594	0.0873568	0.0570989	0.0541488	0.0521602	0.0480426	0.041583	0.0549165	0.0409586
SCGLU2	0.026699	0.0552532	0.139202	0.0820404	0.0729066	0.0666772	0.0449962	0.0560418	0.109705	0.109273	0.100207	0.120848	0.0895356	0.082306	0.0802988	0.0901554	0.0569858	0.0468093	0.0451123	0.0473378	0.0406028	0.0623493	0.0493546
SCINH3	0.0276715	0.0527077	0.0869775	0.0635629	0.0619586	0.0549925	0.0519955	0.0539916	0.0779002	0.0800119	0.0759681	0.0807515	0.0646514	0.0613996	0.0708263	0.0766499	0.0505885	0.0423551	0.0374439	0.0448326	0.0405422	0.0595311	0.0503412
SCINH1	0.0311034	0.0924337	0.36389	0.286713	0.18499	0.164365	0.436626	0.0650136	0.201865	0.129625	0.194657	0.215318	0.115658	0.145649	0.315367	0.168595	0.0774211	0.0671149	0.109211	0.0678691	0.120711	0.133181	0.0918789
SCINH5	0.0315418	0.0994235	0.314	0.198225	0.180479	0.158354	0.191868	0.0788576	0.174613	0.139252	0.184431	0.263247	0.152869	0.121154	0.241073	0.190355	0.0926257	0.0799625	0.121223	0.0868678	0.114262	0.133116	0.087131
TEGLU7	0.0329889	0.102055	0.203059	0.123359	0.108938	0.129365	0.059259	0.0768121	0.124464	0.21362	0.255	0.226442	0.110228	0.162802	0.139084	0.129439	0.879079	0.405856	0.664994	0.443105	0.682762	0.128281	0.12552
MEINH8	0.0333875	0.0633224	0.232732	0.157103	0.10921	0.0908278	0.0632503	0.0665458	0.132284	0.125603	0.152448	0.193013	0.164144	0.0916383	0.208146	0.17025	0.0606494	0.0634225	0.0817615	0.06173	0.0791466	0.10965	0.0774329
TEGLU22	0.0346716	0.138847	0.366437	0.21036	0.191903	0.148621	0.0614384	0.110311	0.209613	0.266778	0.249011	0.3606	0.176058	0.173324	0.194141	0.192677	0.766172	0.533302	0.837274	0.666084	0.718112	0.206352	0.133862
HBCHO1	0.0355469	0.0785549	0.163779	0.102931	0.12195	0.127617	0.0758194	0.0908002	0.102054	0.0853131	0.0818082	0.0985855	0.0863349	0.0748136	0.101318	0.110686	0.0621885	0.0485238	0.055576	0.0634738	0.055389	0.0787652	0.0731998
SCINH9	0.0395052	0.05553	0.124288	0.078322	0.0936278	0.085312	0.109352	0.081737	0.101072	0.149697	0.143595	0.139671	0.114984	0.092523	0.0985988	0.117328	0.0636849	0.0746466	0.0570899	0.071416	0.0764455	0.0862553	0.064771
PSPEP5	0.0406528	0.0702031	0.129564	0.0964132	0.119671	0.0846307	0.0669959	0.0930035	0.114756	0.0877604	0.0838742	0.14747	0.0991709	0.0644415	0.0976413	0.10207	0.0564852	0.0561315	0.0790049	0.0737304	0.0685219	0.0882786	0.0684109
HYPEP2	0.0429835	0.120687	0.454914	0.257251	0.325601	0.153156	0.0946444	0.187236	0.238581	0.335827	0.23868	0.44546	0.301749	0.107173	0.247767	0.304354	0.111522	0.116303	0.142691	0.0928808	0.0949572	0.237137	0.112337
SCGLU6	0.0430117	0.0699658	0.199413	0.0920792	0.156986	0.0836092	0.0779311	0.103653	0.129595	0.279912	0.24539	0.294865	0.170418	0.0890885	0.10194	0.119266	0.103092	0.112191	0.102393	0.0900333	0.102836	0.100539	0.0584062
TEINH7	0.0440573	0.0717583	0.157442	0.131907	0.115045	0.0761417	0.0580366	0.0807762	0.110726	0.138873	0.131492	0.171675	0.147898	0.0641476	0.12508	0.152475	0.0812735	0.0915629	0.104761	0.0863564	0.107305	0.124924	0.204911
HBGLU8	0.0447996	0.197762	0.658655	0.462334	0.511928	0.857366	0.200005	0.200006	0.363734	0.202692	0.247284	0.344137	0.200018	0.27206	0.552579	0.354226	0.141667	0.113273	0.218019	0.14851	0.230644	0.267209	0.17377
TEINH8	0.0508774	0.0709869	0.168598	0.121682	0.0796694	0.0928309	0.0693631	0.0713419	0.099126	0.161023	0.139904	0.125805	0.116942	0.0812366	0.119912	0.118819	0.0999939	0.109244	0.116417	0.105115	0.121828	0.110616	0.160914
SCINH7	0.0545242	0.0939738	0.218809	0.124274	0.185759	0.162121	0.213091	0.100339	0.18031	0.204181	0.203558	0.314451	0.212188	0.143164	0.187331	0.203594	0.116604	0.117977	0.127035	0.117335	0.121207	0.130265	0.105904
DECHO2	0.0554765	0.164167	0.471875	0.266635	0.187027	0.220303	0.102547	0.132389	0.258777	0.216037	0.213083	0.327861	0.310505	0.168196	0.287826	0.214132	0.0885237	0.105614	0.125832	0.100146	0.115454	0.175167	0.119407
MSN3	0.0559265	0.140006	0.214575	0.173842	0.157413	0.139528	0.107716	0.107596	0.168315	0.321306	0.303412	0.297186	0.209418	0.308453	0.192151	0.18687	0.5212	0.317726	0.390968	0.314634	0.480049	0.188941	0.149634
HBSER1	0.0575738	0.276283	0.676256	0.546051	0.600148	0.280169	0.162178	0.675854	0.494857	0.395273	0.332065	0.64586	0.402964	0.210955	0.615927	0.593021	0.179855	0.154447	0.283615	0.194595	0.221949	0.458665	0.275245
PSNP5	0.0578338	0.11546	0.200575	0.167863	0.162435	0.149315	0.109686	0.15835	0.167473	0.119581	0.0955986	0.190867	0.135434	0.101701	0.163263	0.153479	0.081171	0.0790661	0.114628	0.0968016	0.106804	0.134715	0.103787
MEINH14	0.0592362	0.0787455	0.118694	0.104344	0.0813447	0.0839798	0.073968	0.0950894	0.0996559	0.0947063	0.0948755	0.101382	0.0968458	0.0838699	0.103578	0.108692	0.0782175	0.0800041	0.074397	0.0714241	0.074346	0.0888586	0.08736
MBDOP2	0.0623457	0.2324	0.692914	0.529429	0.456389	0.23313	0.157081	0.309581	0.418731	0.416477	0.363409	0.550779	0.429159	0.180186	0.497288	0.4776	0.178044	0.205998	0.308536	0.175082	0.222884	0.407564	0.234446
TEINH20	0.0624536	0.204221	0.488649	0.383395	0.287354	0.208893	0.1469	0.158616	0.316663	0.255437	0.276352	0.382058	0.227247	0.207477	0.40279	0.346222	0.232431	0.191694	0.266975	0.213408	0.300609	0.314577	0.449498
SCGLU10	0.0626434	0.177394	0.387576	0.198255	0.267809	0.177121	0.143052	0.140233	0.313434	0.237835	0.390407	0.354378	0.338876	0.231807	0.300861	0.239966	0.142666	0.128625	0.134627	0.111978	0.175301	0.123412	0.112028
TEINH14	0.0640561	0.130217	0.339831	0.247272	0.193772	0.167582	0.137937	0.137926	0.199737	0.248354	0.249978	0.284645	0.218683	0.176087	0.257071	0.229578	0.254858	0.254298	0.298575	0.211399	0.350136	0.24411	0.512527
OBINH4	0.0662506	0.076555	0.0943639	0.0658384	0.0723224	0.0893731	0.0850439	0.0537538	0.0820064	0.112782	0.13964	0.104008	0.0913217	0.13509	0.0729835	0.0829972	0.113408	0.103102	0.0866533	0.086098	0.107609	0.069857	0.0962122
CBNBL1	0.0663725	0.132955	0.265568	0.161223	0.169084	0.269736	0.152428	0.0961088	0.143005	0.13852	0.173738	0.190416	0.125594	0.131927	0.192639	0.13688	0.105568	0.0844418	0.123892	0.102688	0.112378	0.115803	0.102301
TEINH6	0.0698545	0.155359	0.340045	0.278114	0.220478	0.138894	0.124903	0.148305	0.221261	0.280303	0.243806	0.362408	0.307945	0.133699	0.275515	0.286013	0.140716	0.176194	0.187877	0.153107	0.126692	0.25055	0.439569
ENT1	0.0720003	0.0898228	0.108435	0.101909	0.138256	0.096356	0.0990093	0.127162	0.0959534	0.11052	0.0901965	0.116767	0.100942	0.0841187	0.101045	0.103252	0.0766004	0.0796179	0.0979414	0.0856989	0.0775388	0.0949001	0.0943402
DEGLU2	0.0721399	0.488589	0.791141	0.595283	0.43793	0.379732	0.177756	0.24991	0.532408	0.462257	0.582951	0.633206	0.440688	0.286996	0.572723	0.467603	0.344908	0.293579	0.455524	0.313905	0.442924	0.413423	0.270076
PSPEP4	0.0790418	0.157528	0.320779	0.278104	0.260546	0.213232	0.150487	0.197683	0.274628	0.191968	0.202711	0.288588	0.22676	0.151122	0.26551	0.238028	0.149023	0.149584	0.196548	0.184495	0.206413	0.212441	0.179126
HBGLU4	0.0814059	0.232655	0.706906	0.487816	0.573473	0.463999	0.237443	0.266182	0.412685	0.276428	0.285423	0.426916	0.346014	0.196596	0.516862	0.464815	0.157817	0.168459	0.247083	0.169441	0.200775	0.325415	0.198974
CBINH2	0.0860432	0.20301	0.347837	0.323465	0.230224	0.274959	0.24488	0.147272	0.284471	0.139889	0.191921	0.218855	0.209452	0.19694	0.392563	0.257102	0.133954	0.123467	0.153327	0.137029	0.189541	0.211037	0.165075
PSNF3	0.0876325	0.219841	0.462092	0.42015	0.302616	0.321896	0.191296	0.232902	0.38555	0.209176	0.275867	0.344092	0.26297	0.236822	0.416086	0.297639	0.174298	0.153978	0.225257	0.211799	0.252134	0.257803	0.240337
PSNP6	0.0876467	0.174265	0.287279	0.262197	0.221489	0.253067	0.163818	0.207379	0.242954	0.165317	0.176798	0.272385	0.198792	0.165941	0.272811	0.222395	0.148609	0.143711	0.18192	0.174579	0.151426	0.198558	0.165047
MEINH1	0.0881487	0.149956	0.262967	0.256913	0.149951	0.196854	0.164393	0.114121	0.192738	0.129826	0.172997	0.139595	0.125246	0.158818	0.338145	0.221667	0.103311	0.104036	0.0789638	0.104493	0.112954	0.189763	0.185641
TEINH10	0.0939381	0.214954	0.478288	0.401366	0.281726	0.256196	0.164586	0.211216	0.321933	0.302506	0.279899	0.38159	0.292589	0.217522	0.427114	0.375659	0.206239	0.212084	0.210549	0.231384	0.27158	0.343995	0.874955
SCINH11	0.101045	0.176245	0.276247	0.234573	0.208518	0.185019	0.124259	0.206724	0.243459	0.285378	0.241485	0.261173	0.263214	0.13496	0.257897	0.269189	0.137278	0.146965	0.140471	0.126399	0.140355	0.255739	0.186173
SCGLU9	0.101804	0.169496	0.31607	0.167135	0.235977	0.194052	0.166926	0.181104	0.287182	0.345443	0.352776	0.351396	0.346609	0.26146	0.247376	0.214982	0.171472	0.195471	0.172153	0.173405	0.191918	0.169428	0.154587
TEINH21	0.101873	0.289767	0.549827	0.476435	0.383403	0.288355	0.221938	0.293318	0.450033	0.420236	0.394679	0.526471	0.396488	0.267955	0.487995	0.446404	0.232038	0.23491	0.272731	0.23083	0.281348	0.442521	0.295251
HYPEP4	0.10694	0.266387	0.563897	0.385346	0.384529	0.248262	0.181925	0.321026	0.359202	0.390263	0.31694	0.447595	0.439968	0.195283	0.44315	0.407329	0.158206	0.200073	0.240785	0.193369	0.217654	0.335379	0.215768
DEINH8	0.108778	0.170441	0.279692	0.230319	0.233566	0.127656	0.119931	0.173347	0.203366	0.256505	0.203217	0.285169	0.29276	0.139201	0.203293	0.240473	0.121344	0.169019	0.148967	0.139417	0.136593	0.212947	0.169812
HYPEP7	0.111833	0.225604	0.449461	0.320053	0.383773	0.186962	0.156209	0.296655	0.278002	0.329131	0.226052	0.416535	0.319068	0.154059	0.290744	0.32781	0.191897	0.201646	0.26627	0.208084	0.179802	0.335543	0.222515
TEGLU14	0.117256	0.333632	0.594707	0.478403	0.440786	0.385288	0.237608	0.234273	0.433635	0.411662	0.533972	0.513449	0.3945	0.429354	0.485464	0.429868	0.785771	0.576037	0.822073	0.628058	0.756892	0.38023	0.310966
SCGLU7	0.117559	0.164858	0.237207	0.163836	0.193179	0.163863	0.149614	0.141042	0.265186	0.235394	0.203053	0.3015	0.259665	0.254273	0.20091	0.202722	0.178183	0.184771	0.167669	0.183812	0.185073	0.173473	0.21706
OBINH1	0.119972	0.142558	0.17757	0.173448	0.147665	0.179401	0.160971	0.120681	0.172756	0.230271	0.240845	0.198333	0.169532	0.238012	0.184388	0.169205	0.315662	0.263206	0.244162	0.221831	0.255266	0.195186	0.236224
PSNF2	0.122111	0.316703	0.638501	0.589114	0.402781	0.487308	0.269421	0.282108	0.492185	0.316296	0.365044	0.465424	0.351506	0.31725	0.583954	0.428227	0.212958	0.215434	0.311322	0.247942	0.33837	0.370595	0.296864
PSPEP8	0.130236	0.274029	0.503493	0.400871	0.365979	0.389143	0.263593	0.276729	0.427715	0.350296	0.450616	0.398862	0.304232	0.305346	0.423877	0.36305	0.235105	0.246826	0.301807	0.247726	0.308201	0.278858	0.256553
MEINH5	0.138212	0.391337	0.889446	0.776504	0.622632	0.524927	0.370858	0.34487	0.701049	0.5406	0.627043	0.655935	0.593473	0.423398	0.920132	0.787158	0.236737	0.219072	0.284466	0.231915	0.31774	0.591448	0.393779
HBINH1	0.145172	0.175604	0.300983	0.26402	0.317287	0.263411	0.211799	0.220136	0.261174	0.282245	0.298999	0.323857	0.262744	0.268408	0.324066	0.286543	0.226779	0.224847	0.247839	0.225987	0.220825	0.251166	0.265834
OBDOP1	0.145993	0.198916	0.320449	0.303502	0.234318	0.247794	0.231365	0.19138	0.225912	0.231145	0.268205	0.267878	0.239014	0.234984	0.298173	0.268548	0.170665	0.190517	0.189298	0.213487	0.189209	0.262369	0.293377
OBNBL5	0.147511	0.187486	0.252674	0.223898	0.161286	0.20273	0.196406	0.151296	0.161799	0.198346	0.184921	0.188882	0.192633	0.20745	0.224143	0.216549	0.164735	0.201198	0.171162	0.178574	0.206989	0.198008	0.30315
SCINH6	0.152058	0.321864	0.679721	0.469244	0.484495	0.430545	0.52459	0.312668	0.552689	0.569532	0.622216	0.725234	0.54122	0.527387	0.563175	0.563085	0.343872	0.357639	0.377176	0.316319	0.353708	0.413891	0.303216
SCGLU8	0.176614	0.2775	0.403808	0.259728	0.273999	0.297922	0.25173	0.227344	0.343927	0.333305	0.343126	0.405771	0.374692	0.323422	0.323642	0.307677	0.283553	0.252985	0.263006	0.271138	0.294655	0.238886	0.219597
OBINH3	0.183737	0.22662	0.268086	0.234716	0.226663	0.272525	0.269774	0.190995	0.261649	0.260567	0.337517	0.27742	0.255398	0.364261	0.285523	0.221106	0.500852	0.387955	0.377038	0.35181	0.38302	0.249429	0.340517
OBNBL4	0.234544	0.245619	0.255835	0.287634	0.223994	0.333165	0.334996	0.226175	0.224715	0.277223	0.263393	0.235656	0.261149	0.275342	0.283748	0.294092	0.246431	0.299429	0.240346	0.268232	0.232323	0.277047	0.31843
MSN6	0.238975	0.284675	0.368415	0.308979	0.284677	0.276838	0.308304	0.301276	0.329297	0.463516	0.463269	0.40995	0.411996	0.445643	0.338857	0.335551	0.501524	0.408617	0.411595	0.424174	0.492211	0.327984	0.300821
HYPEP6	0.241753	0.547516	0.848823	0.711496	0.747819	0.524369	0.429282	0.653974	0.653285	0.767618	0.65259	0.82094	0.678283	0.519421	0.695584	0.692655	0.437166	0.436309	0.564742	0.464169	0.510574	0.666468	0.494148
ENT5	0.249816	0.312967	0.381945	0.367775	0.519905	0.376428	0.376216	0.437312	0.36255	0.376502	0.372878	0.443451	0.330884	0.311346	0.375029	0.354853	0.278475	0.321406	0.348514	0.321109	0.30005	0.355942	0.356134
OBINH2	0.320441	0.403386	0.465634	0.450381	0.39204	0.476013	0.460285	0.345253	0.452742	0.40742	0.515114	0.457268	0.396448	0.58232	0.501328	0.377938	0.671204	0.572601	0.552997	0.541019	0.608586	0.435309	0.527894
SCGLU5	0.322682	0.472097	0.778705	0.556269	0.63593	0.503623	0.459606	0.52727	0.696839	0.774545	0.756396	0.846917	0.715082	0.57095	0.598685	0.632678	0.530724	0.540533	0.487631	0.481068	0.510956	0.586022	0.466622
PSPEP6	0.351367	0.513035	0.701748	0.589431	0.565629	0.579058	0.515507	0.548101	0.65051	0.613138	0.603954	0.659097	0.618216	0.540355	0.605831	0.596946	0.417477	0.449434	0.518287	0.483501	0.474463	0.523454	0.502705
DGNBL2	0.354822	0.440427	0.470883	0.367331	0.305005	0.534564	0.406133	0.319967	0.389119	0.555554	0.470648	0.495187	0.46076	0.499145	0.376788	0.419258	0.56758	0.521146	0.553535	0.678378	0.457343	0.388274	0.495765
SYNOR2	0.371119	0.522547	0.655557	0.579618	0.569275	0.608732	0.459901	0.626576	0.630753	0.586541	0.600829	0.65644	0.576112	0.463893	0.642148	0.638497	0.483448	0.491074	0.562559	0.506781	0.531548	0.581492	0.567679
PSNP1	0.383927	0.608948	0.714295	0.667658	0.619368	0.644867	0.533867	0.641473	0.674276	0.617454	0.605704	0.672481	0.634246	0.509653	0.66704	0.641482	0.563876	0.550871	0.659342	0.624054	0.583393	0.609206	0.576684
NFOL2	0.396719	0.314132	0.231401	0.297438	0.3671	0.311822	0.361809	0.414734	0.299966	0.28904	0.308028	0.27946	0.30092	0.3373	0.257644	0.299028	0.316999	0.294705	0.287508	0.326489	0.307296	0.319327	0.37054
CBNBL2	0.414511	0.416965	0.464619	0.434198	0.387566	0.712226	0.486201	0.366651	0.452857	0.491022	0.518586	0.508366	0.426505	0.451982	0.437876	0.442886	0.462055	0.481954	0.423029	0.510124	0.423804	0.398513	0.528528
SYCHO2	0.420945	0.516281	0.674257	0.570374	0.598438	0.567525	0.477391	0.588309	0.590707	0.565027	0.529399	0.639993	0.563224	0.476514	0.58376	0.599936	0.483236	0.494586	0.55987	0.505322	0.552671	0.57194	0.532781
PSPEP7	0.424803	0.610508	0.782721	0.674087	0.659594	0.677362	0.567268	0.627016	0.729802	0.698636	0.734293	0.754601	0.690585	0.616933	0.720671	0.714106	0.506485	0.500234	0.568871	0.589063	0.542603	0.631141	0.620201
ENT6	0.431472	0.548767	0.662406	0.637062	0.807122	0.549914	0.610928	0.74721	0.64054	0.674759	0.63065	0.780676	0.622427	0.555503	0.655617	0.614775	0.542713	0.56662	0.682714	0.557052	0.559998	0.614667	0.6214
CR	0.462517	0.541673	0.720494	0.620931	0.650867	0.558548	0.532644	0.576254	0.68844	0.682451	0.654608	0.73758	0.680142	0.560014	0.591636	0.678608	0.548556	0.539129	0.599044	0.579622	0.553076	0.635939	0.516366
NFOL1	0.466656	0.409408	0.332531	0.390266	0.34347	0.439521	0.408819	0.430632	0.363071	0.396178	0.356748	0.355844	0.400803	0.410571	0.328695	0.376244	0.418324	0.382116	0.355122	0.414855	0.355666	0.409333	0.422381
PSNP2	0.496314	0.655463	0.754826	0.721839	0.711999	0.691585	0.64872	0.704399	0.727825	0.668466	0.635991	0.737843	0.685686	0.588739	0.720114	0.695218	0.577425	0.575229	0.665444	0.618904	0.615308	0.660537	0.595995
ENT3	0.500141	0.545885	0.606754	0.636781	0.775306	0.615999	0.615505	0.745524	0.574153	0.568825	0.542972	0.682768	0.568721	0.502389	0.653616	0.598562	0.487569	0.549033	0.632762	0.550462	0.475984	0.628792	0.644244
PSNP4	0.539021	0.664527	0.78039	0.72826	0.73914	0.70306	0.674103	0.74106	0.732713	0.696557	0.649176	0.72427	0.71053	0.632135	0.742711	0.703684	0.629607	0.600321	0.685869	0.671661	0.633786	0.695681	0.652214
SZNBL	0.541062	0.51178	0.463419	0.517132	0.434352	0.597185	0.558028	0.47008	0.513581	0.56958	0.553006	0.537001	0.56637	0.523358	0.507521	0.540837	0.524811	0.557036	0.488377	0.534395	0.437008	0.525273	0.550991
MOL1	0.543641	0.430504	0.323042	0.388971	0.376449	0.49471	0.491563	0.433016	0.410452	0.402737	0.434818	0.390624	0.435183	0.448522	0.388899	0.40331	0.385168	0.408779	0.354008	0.3882	0.392537	0.432436	0.471778
MFOL2	0.597107	0.502462	0.416921	0.495178	0.458989	0.572646	0.563575	0.535433	0.497273	0.514616	0.505924	0.471269	0.52115	0.535189	0.449329	0.486679	0.507749	0.488639	0.444415	0.504784	0.506936	0.527566	0.564402
MFOL1	0.60484	0.442728	0.267556	0.426943	0.534937	0.502138	0.579267	0.597282	0.42278	0.422791	0.436856	0.371077	0.427391	0.499526	0.415343	0.432975	0.423886	0.421741	0.37844	0.430452	0.403122	0.447864	0.537478
MOL2	0.611567	0.473801	0.287399	0.409932	0.488165	0.504423	0.555724	0.571142	0.420791	0.383891	0.441055	0.38782	0.44307	0.469452	0.407251	0.441237	0.413053	0.424624	0.38467	0.442616	0.415848	0.468091	0.563397
OBDOP2	0.626835	0.668436	0.654469	0.698726	0.630377	0.70264	0.71521	0.642268	0.674338	0.728055	0.749832	0.693953	0.710097	0.732645	0.711074	0.675264	0.80235	0.76025	0.740298	0.765232	0.735082	0.743637	0.796453
OPC	0.633609	0.621787	0.631219	0.617988	0.55443	0.583063	0.610589	0.606721	0.60451	0.686496	0.671221	0.647611	0.680676	0.67584	0.602287	0.672807	0.597612	0.688005	0.593112	0.596054	0.535509	0.612896	0.57283
OBNBL3	0.658225	0.650151	0.62772	0.649165	0.598523	0.709028	0.68761	0.668866	0.617093	0.69559	0.676684	0.6308	0.651527	0.634196	0.645906	0.679529	0.69605	0.69235	0.67041	0.7064	0.624396	0.674709	0.79349
ENT4	0.681326	0.71488	0.722122	0.723076	0.816484	0.756074	0.73182	0.815875	0.731653	0.731146	0.742127	0.785926	0.717202	0.681754	0.712587	0.716679	0.645742	0.713365	0.708034	0.693813	0.628421	0.739084	0.750582
ENT7	0.681963	0.741166	0.803135	0.755112	0.907908	0.766174	0.781717	0.90707	0.790911	0.850484	0.809926	0.856508	0.819434	0.745535	0.812731	0.814114	0.692365	0.702604	0.806276	0.735084	0.741868	0.780576	0.758662
DGNBL1	0.694701	0.696101	0.682351	0.638459	0.623492	0.786993	0.752257	0.678613	0.664593	0.719876	0.730684	0.706268	0.736308	0.718163	0.655093	0.728319	0.734292	0.733901	0.72943	0.810608	0.676129	0.687045	0.763854
ENT2	0.726149	0.821862	0.867908	0.879959	0.934027	0.84735	0.840812	0.930268	0.858913	0.836446	0.823198	0.892704	0.817182	0.787603	0.883403	0.867537	0.780499	0.801986	0.872136	0.819784	0.799677	0.871471	0.890651
COP2	0.741921	0.713794	0.617322	0.634944	0.708684	0.642522	0.681277	0.770376	0.632992	0.630495	0.600763	0.660498	0.692048	0.699552	0.619765	0.68148	0.696937	0.695948	0.696161	0.701117	0.674171	0.675361	0.679554
HYPEP8	0.742891	0.816979	0.876807	0.861597	0.866138	0.822949	0.832167	0.861708	0.8653	0.893086	0.897385	0.898609	0.880143	0.823381	0.882225	0.866405	0.8024	0.786236	0.80236	0.81929	0.806646	0.863572	0.846931
SYNOR5	0.761556	0.878225	0.922288	0.898119	0.883955	0.911304	0.835517	0.908382	0.896226	0.872002	0.880388	0.905595	0.864348	0.831772	0.894658	0.906463	0.828997	0.842512	0.864744	0.856317	0.859966	0.895992	0.866113
SYCHO1	0.794055	0.896097	0.963308	0.944211	0.931698	0.940579	0.857382	0.93492	0.951756	0.938704	0.924409	0.943467	0.913104	0.876082	0.941708	0.949945	0.856649	0.867099	0.899657	0.874084	0.885791	0.934222	0.921331
SYNOR1	0.796765	0.893073	0.955923	0.925984	0.933984	0.936806	0.862346	0.945341	0.944273	0.935579	0.938942	0.956658	0.924033	0.868526	0.940753	0.954109	0.881476	0.886361	0.911721	0.8977	0.899619	0.92404	0.91404
ACNT2	0.801853	0.751863	0.658073	0.705141	0.558492	0.769855	0.748861	0.710378	0.676213	0.67345	0.658899	0.65673	0.718074	0.73011	0.734625	0.706531	0.656653	0.720589	0.6538	0.694081	0.680546	0.6942	0.763794
CBPC	0.804859	0.857455	0.95391	0.944632	0.923264	0.930384	0.893789	0.868164	0.930777	0.875976	0.932007	0.886066	0.880721	0.892602	0.954217	0.890196	0.857705	0.876231	0.856333	0.860837	0.896575	0.875462	0.867224
PSNP3	0.826112	0.902106	0.952385	0.945718	0.928332	0.924846	0.927608	0.929178	0.949838	0.915477	0.912835	0.941481	0.927941	0.892295	0.944937	0.933807	0.884416	0.885415	0.917699	0.904853	0.898159	0.917194	0.900847
RGSZ	0.866152	0.802271	0.694204	0.778134	0.669572	0.808941	0.834688	0.794214	0.740653	0.782968	0.694571	0.731017	0.786255	0.789935	0.752924	0.769979	0.763761	0.812631	0.710733	0.791442	0.746845	0.777412	0.814433
EPEN	0.886603	0.857258	0.872868	0.869951	0.865494	0.908897	0.879255	0.891628	0.884066	0.878773	0.871005	0.87932	0.864118	0.862243	0.899474	0.88578	0.874684	0.862641	0.836379	0.878245	0.857789	0.884267	0.874478
MOL3	0.88974	0.833329	0.748679	0.804071	0.80125	0.882435	0.850336	0.859053	0.824296	0.807211	0.81951	0.823795	0.845056	0.820356	0.805028	0.825851	0.798652	0.817758	0.772909	0.821001	0.81802	0.844866	0.875159
ACOB	0.895171	0.864572	0.749468	0.803038	0.67979	0.837115	0.870023	0.840138	0.786158	0.818426	0.767123	0.777125	0.826771	0.81735	0.818102	0.790858	0.814828	0.850332	0.789026	0.833193	0.808036	0.799112	0.855239
MGL1	0.908354	0.872207	0.848488	0.845002	0.811492	0.899644	0.886976	0.852621	0.868164	0.871939	0.871158	0.846845	0.891091	0.873581	0.838225	0.880673	0.887627	0.89772	0.853774	0.881585	0.877797	0.845109	0.870788
ACNT1	0.912125	0.88581	0.858893	0.845081	0.749444	0.913588	0.90325	0.870106	0.841726	0.851896	0.833995	0.821173	0.867543	0.878775	0.884059	0.862537	0.798983	0.857175	0.803567	0.836467	0.828593	0.832693	0.874106
VSMCA	0.935224	0.90849	0.887226	0.886964	0.842259	0.938852	0.935123	0.907039	0.902634	0.910549	0.915869	0.908171	0.913117	0.899956	0.882899	0.903859	0.914168	0.929139	0.896499	0.924461	0.89116	0.896528	0.882796
DETPH	0.94076	0.947144	0.965908	0.95792	0.941062	0.958972	0.957321	0.958055	0.965585	0.971833	0.97615	0.978017	0.950853	0.948791	0.962554	0.960322	0.938693	0.948853	0.946754	0.958394	0.940295	0.957207	0.945131
ACTE1	0.940869	0.911279	0.831521	0.867757	0.784572	0.894532	0.91643	0.905535	0.870503	0.89174	0.853081	0.864533	0.888309	0.896367	0.875222	0.865533	0.884695	0.89991	0.846755	0.906493	0.881524	0.881047	0.910102
COP1	0.94155	0.944752	0.923151	0.919279	0.906049	0.924183	0.906462	0.939398	0.923724	0.926968	0.914575	0.935981	0.95338	0.924801	0.916771	0.941641	0.929806	0.938427	0.935042	0.936424	0.926908	0.932849	0.913821
MGL2	0.946708	0.92555	0.913788	0.913239	0.888208	0.945175	0.93485	0.916237	0.933138	0.925473	0.926795	0.917161	0.9395	0.929337	0.910558	0.936179	0.932427	0.938339	0.908877	0.926839	0.934958	0.909752	0.918061
SYNOR3	0.95716	0.988038	0.996304	0.990975	0.990791	0.994039	0.97959	0.995876	0.994481	0.990041	0.990347	0.994585	0.989179	0.977994	0.995033	0.99523	0.981455	0.984151	0.989667	0.987559	0.98965	0.992089	0.990941
ACMB	0.966317	0.950345	0.930055	0.94184	0.894264	0.96549	0.940041	0.942665	0.927351	0.934407	0.920467	0.935765	0.946229	0.940271	0.94942	0.941046	0.916663	0.944672	0.901407	0.942784	0.925295	0.944809	0.949342
SYNOR4	0.967682	0.991328	0.997599	0.99557	0.99236	0.996689	0.985707	0.995889	0.996766	0.99534	0.996125	0.996804	0.991949	0.988096	0.996679	0.997344	0.987653	0.989847	0.992196	0.992115	0.992728	0.995408	0.995083
ACTE2	0.967805	0.957029	0.911752	0.927783	0.884861	0.947519	0.960047	0.946547	0.938306	0.940395	0.923435	0.929817	0.948399	0.949194	0.939997	0.929692	0.934876	0.948316	0.92814	0.942472	0.934465	0.933353	0.945762
RGDG	0.98369	0.972795	0.950025	0.965685	0.917283	0.975003	0.97642	0.966614	0.957932	0.97268	0.949743	0.954525	0.970786	0.969968	0.960833	0.961345	0.969062	0.982946	0.965355	0.974288	0.969577	0.966915	0.975117
ACBG	0.984672	0.9737	0.962626	0.970236	0.952166	0.979422	0.973641	0.974657	0.967777	0.970193	0.964667	0.962472	0.973884	0.9706	0.977135	0.971994	0.952183	0.973967	0.954289	0.963864	0.953152	0.967735	0.980267
MGL3	0.985296	0.97647	0.973706	0.973734	0.962329	0.985469	0.981712	0.973338	0.979052	0.977574	0.977763	0.973563	0.983521	0.980456	0.971006	0.980364	0.982137	0.981811	0.971411	0.978777	0.981131	0.971133	0.976545
EPSC	0.986837	0.978543	0.969631	0.977222	0.975626	0.987969	0.986259	0.981431	0.982708	0.985213	0.980266	0.985955	0.985392	0.97556	0.982418	0.98435	0.980876	0.985846	0.965491	0.984425	0.97487	0.984785	0.980004
PVM2	0.991238	0.986421	0.980228	0.980312	0.975376	0.986658	0.989047	0.979707	0.986057	0.983909	0.983339	0.983491	0.9899	0.985859	0.981715	0.984154	0.987219	0.988518	0.982335	0.986813	0.98337	0.982725	0.982672
PVM1	0.991277	0.98543	0.98055	0.978821	0.973187	0.985997	0.988639	0.979066	0.985151	0.982929	0.981608	0.980333	0.989633	0.984176	0.981576	0.98395	0.984742	0.987161	0.979061	0.985792	0.982088	0.982068	0.983009
HYPEN	0.99202	0.990553	0.988262	0.988337	0.982139	0.993861	0.992431	0.989665	0.991271	0.993011	0.99253	0.99009	0.99296	0.986921	0.991421	0.990781	0.98642	0.990116	0.98051	0.988927	0.982453	0.989969	0.985391
OEC	0.992113	0.984917	0.986315	0.975259	0.959845	0.98442	0.983049	0.980434	0.96976	0.98513	0.984031	0.977318	0.986773	0.981051	0.974717	0.979291	0.980291	0.990064	0.980153	0.984741	0.979524	0.983102	0.988102
ENTG1	0.992478	0.986578	0.968053	0.979671	0.983427	0.990118	0.989619	0.989468	0.982489	0.983773	0.976104	0.983546	0.986052	0.986686	0.976585	0.984413	0.974663	0.985201	0.97693	0.977901	0.972418	0.982292	0.989298
ENTG4	0.992985	0.984911	0.957702	0.971503	0.970586	0.989825	0.98834	0.987008	0.976497	0.976786	0.974905	0.975465	0.983658	0.985062	0.968382	0.977723	0.971287	0.985812	0.969763	0.976956	0.9657	0.978478	0.990086
SCHW	0.995781	0.995433	0.994755	0.995679	0.992081	0.996435	0.994053	0.995186	0.994353	0.994401	0.994377	0.995856	0.995537	0.993744	0.995832	0.994895	0.994665	0.99689	0.992954	0.993056	0.995821	0.993937	0.996156
ENTG2	0.997494	0.994383	0.984626	0.987811	0.989399	0.995629	0.995656	0.995397	0.989672	0.989784	0.986867	0.989144	0.993259	0.992982	0.986636	0.990954	0.987566	0.994102	0.988056	0.990344	0.985691	0.991666	0.995629
ABC	0.997691	0.997349	0.997348	0.997536	0.99496	0.99843	0.997531	0.996204	0.997531	0.99706	0.997176	0.997498	0.997476	0.997398	0.998165	0.998149	0.995016	0.997397	0.995185	0.996544	0.994472	0.996348	0.996694
VECV	0.997778	0.996634	0.993741	0.99511	0.990968	0.997065	0.996909	0.995114	0.996251	0.99615	0.99524	0.995328	0.997042	0.995945	0.994879	0.995518	0.995252	0.996938	0.994585	0.996378	0.994618	0.99502	0.994682
EPMB	0.997962	0.997588	0.996533	0.996847	0.992032	0.998049	0.997196	0.997056	0.996356	0.998063	0.998178	0.997544	0.997193	0.995839	0.996183	0.996715	0.994715	0.996812	0.991716	0.997414	0.99288	0.996555	0.995694
ENTG3	0.99821	0.99563	0.985784	0.990664	0.990724	0.996724	0.996574	0.996462	0.99297	0.993226	0.991475	0.992668	0.995129	0.995829	0.989506	0.99358	0.990673	0.995755	0.990011	0.992304	0.989436	0.993905	0.996664
VECA	0.998233	0.99683	0.99274	0.994976	0.992368	0.99685	0.997979	0.996471	0.995959	0.993785	0.992185	0.993223	0.99683	0.995529	0.995815	0.995285	0.991708	0.996141	0.994412	0.995252	0.992184	0.995148	0.993969
SATG2	0.999172	0.998228	0.99841	0.998375	0.996482	0.998821	0.99829	0.998743	0.998221	0.998547	0.998029	0.998648	0.999125	0.997795	0.998398	0.998715	0.997143	0.998763	0.997482	0.998179	0.997666	0.998516	0.998654
ENTG6	0.999262	0.998171	0.994459	0.996387	0.996445	0.998727	0.998759	0.998698	0.997026	0.997313	0.996311	0.99723	0.998058	0.997873	0.995773	0.997801	0.994636	0.997726	0.995879	0.996321	0.994697	0.997485	0.998492
ENTG5	0.999531	0.998889	0.995973	0.997629	0.997843	0.999049	0.99921	0.999147	0.997707	0.997998	0.997138	0.997842	0.998671	0.99863	0.997107	0.998402	0.996408	0.998515	0.996983	0.997455	0.996391	0.998336	0.999021
VLMC1	0.99972	0.999538	0.999104	0.998828	0.998022	0.999622	0.999645	0.999147	0.999109	0.999298	0.998996	0.99922	0.999464	0.999135	0.999104	0.999059	0.998872	0.999411	0.998763	0.999318	0.998547	0.999069	0.998955
VECC	0.999752	0.999658	0.999033	0.999248	0.998443	0.999653	0.999599	0.999393	0.999382	0.999589	0.999457	0.999336	0.999673	0.999412	0.999225	0.999348	0.999282	0.999549	0.999074	0.999428	0.998988	0.999293	0.999329
ENTG7	0.99991	0.999751	0.998936	0.999554	0.999536	0.999771	0.999828	0.999863	0.999541	0.999586	0.99952	0.999674	0.999731	0.999707	0.9995	0.999685	0.998998	0.999673	0.999377	0.99947	0.998955	0.999681	0.999755
SATG1	0.999924	0.999884	0.999847	0.999907	0.999697	0.99996	0.999915	0.999882	0.999912	0.999907	0.999876	0.999929	0.999919	0.999848	0.999889	0.999914	0.999842	0.999909	0.999835	0.999882	0.999826	0.999844	0.999922
PER2	0.999966	0.999945	0.999814	0.99992	0.999776	0.999958	0.999956	0.999924	0.999923	0.999927	0.99992	0.999913	0.999953	0.999908	0.999935	0.999926	0.999884	0.999935	0.999886	0.999926	0.999865	0.999906	0.999909
CHOR	0.999968	0.999912	0.99983	0.999934	0.999956	0.99997	0.999968	0.999986	0.999922	0.999919	0.999861	0.999869	0.999917	0.999905	0.999936	0.999947	0.999907	0.999926	0.999881	0.999942	0.999834	0.99995	0.999871
VLMC2	0.999995	0.999991	0.999989	0.999984	0.999969	0.999994	0.999989	0.999985	0.999988	0.999991	0.999992	0.99999	0.999993	0.999986	0.99999	0.999989	0.99998	0.999991	0.999978	0.999989	0.999966	0.999982	0.999974
PER1	0.999998	0.999996	0.999988	0.999993	0.999981	0.999997	0.999997	0.999995	0.999995	0.999992	0.999992	0.999994	0.999997	0.999994	0.999995	0.999993	0.999989	0.999994	0.999988	0.999996	0.999987	0.999992	0.999994
PER3	1	1	0.999999	0.999999	0.999999	1	1	0.999999	0.999999	0.999999	0.999999	0.999999	1	0.999999	0.999999	0.999999	0.999999	1	0.999999	0.999999	0.999998	0.999999	0.999999
ENMFB	1	1	1	1	1	1	1	1	1	1	1	1	1	1	1	1	1	1	1	1	1	1	1
