# Supplementary material for: Genetic mapping of etiologic brain cell types for obesity
Source: eLife. 2020 Sep 21;9:e55851. doi: 10.7554/eLife.55851 (PMC7505664; doi:10.7554/eLife.55851)
Supplement: Figure 5—source data 1. [file elife-55851-fig5-data1.xlsx]

## Sheet: 12 - HYP metadata
Hypothalamus metadata
Annotation	Dataset	Original annotation label	Marker	Taxonomy1	Taxonomy2	Ncells	No. ES genes DET	No. ES genes GES	No. ES genes NSI	No. ES genes EP	No. ES genes ESmu
ARCME-ASTRO1	ARCME	s32.Astrocytes	Agt/Slc1a2/Sparcl1	Glia	Astrocyte	99	1606	1462	741	1483	1976
ARCME-EPENDY1	ARCME	s01.Ependymocy1	Dbi/Mlc1/Dynlrb2	Glia	Ependymal	37	3369	3900	394	1627	4249
ARCME-EPENDY2	ARCME	s02.Ependymocy2	Sntn/Cdhr4/Col6a5	Glia	Ependymal	430	3524	3321	1624	2463	3875
ARCME-EPI1	ARCME	s11.Endothelial	Hbb-bs/Flt1/Slco1a4	Vascular	Epithelial	240	2631	2316	1486	2112	2876
ARCME-FIBRO1	ARCME	s16.Fibroblasts1	Rpph1/Gbp2/Inmt	Other	Fibroblast	14	1550	1495	524	1424	1778
ARCME-FIBRO2	ARCME	s17.Fibroblasts2	Igf2/Apod/Igfbp2	Other	Fibroblast	38	1355	1182	676	1245	1558
ARCME-FIBRO3	ARCME	s18.Fibroblasts3	Mgp/Gsn/Crispld2	Other	Fibroblast	120	1641	1378	1137	1714	2006
ARCME-MICRO1	ARCME	s15.Microglia	Ctss/Hexb/Cx3cr1	Immune	Microglia	304	2009	1711	1588	2110	2358
ARCME-MURAL1	ARCME	s12.Mural_Cells1	Igfbp3/Plvap/Emcn	Vascular	Mural	29	1739	1483	547	1249	1915
ARCME-MURAL2	ARCME	s13.Mural_Cells2	Acta2/Myl9/Tpm2	Vascular	Mural	55	1944	1825	842	2002	2347
ARCME-NEURO1	ARCME	n01.Hdc	Hdc	Neuron	Neuron	50	2255	1638	309	693	2645
ARCME-NEURO10	ARCME	n10.Ghrh	Ghrh	Neuron	Neuron	504	3313	2232	837	1061	3673
ARCME-NEURO11	ARCME	n11.Trh-Cxcl12	Trh/Cxcl12	Neuron	Neuron	327	2992	1620	556	992	3331
ARCME-NEURO12	ARCME	n12.Agrp-Sst	Agrp/Sst	Neuron	Neuron	539	3747	3000	682	1081	4333
ARCME-NEURO13	ARCME	n13.Agrp-Gm8773	Agrp/Gm8773	Neuron	Neuron	1747	3943	4688	968	1374	5351
ARCME-NEURO14	ARCME	n14.Pomc-Ttr	Pomc/Ttr	Neuron	Neuron	512	3431	1731	524	708	3728
ARCME-NEURO15	ARCME	n15.Pomc-Anxa2	Pomc/Anxa2	Neuron	Neuron	369	3508	3198	526	789	4161
ARCME-NEURO16	ARCME	n16.Rgs16-Vip	Rgs16/Vip	Neuron	Neuron	474	1774	934	1101	1537	2280
ARCME-NEURO17	ARCME	n17.Rgs16-Dlx1	Rgs16/Dlx1	Neuron	Neuron	106	1645	554	301	428	1781
ARCME-NEURO18	ARCME	n18.Rgs16-Slc17a6	Rgs16/Slc17a6	Neuron	Neuron	258	1858	564	529	673	2068
ARCME-NEURO19	ARCME	n19.Gpr50	Gpr50	Neuron	Neuron	67	1691	938	350	725	1934
ARCME-NEURO2	ARCME	n02.Gm8773-Tac1	Gm8773/Tac1	Neuron	Neuron	83	2640	2134	282	642	3178
ARCME-NEURO20	ARCME	n20.Kiss1-Tac2	Kiss1/Tac2	Neuron	Neuron	657	3062	1722	810	1169	3471
ARCME-NEURO21	ARCME	n21.Pomc-Glipr1	Pomc/Glipr1	Neuron	Neuron	310	3699	1949	509	760	3995
ARCME-NEURO22	ARCME	n22.Tmem215	Tmem215	Neuron	Neuron	752	3182	1203	639	897	3517
ARCME-NEURO23	ARCME	n23.Sst-Unc13c	Sst/Unc13c	Neuron	Neuron	552	2872	1421	655	974	3144
ARCME-NEURO24	ARCME	n24.Sst-Pthlh	Sst/Pthlh	Neuron	Neuron	246	3363	2048	579	961	3611
ARCME-NEURO25	ARCME	n25.Th-Lef1	Th/Lef1	Neuron	Neuron	229	2290	846	418	607	2477
ARCME-NEURO26	ARCME	n26.Htr3b	Htr3b	Neuron	Neuron	486	3936	2230	569	883	4211
ARCME-NEURO27	ARCME	n27	Tbx19	Neuron	Neuron	431	2469	1050	592	991	2791
ARCME-NEURO28	ARCME	n28.Qrfp	Qrfp	Neuron	Neuron	66	1544	902	340	678	1756
ARCME-NEURO29	ARCME	n29.Nr5a1-Adcyap1	Nr5a1/Adcyap1	Neuron	Neuron	745	3510	3044	1318	1874	4038
ARCME-NEURO3	ARCME	n03	Th/Sst	Neuron	Neuron	30	2021	1455	290	635	2404
ARCME-NEURO30	ARCME	n30.Nr5a1-Nfib	Nr5a1/Nfib	Neuron	Neuron	316	2183	817	629	838	2370
ARCME-NEURO31	ARCME	n31.Fam19a2	Fam19a2	Neuron	Neuron	171	2736	1380	428	724	2981
ARCME-NEURO32	ARCME	n32.Slc17a6-Trhr	Slc17a6/Trhr	Neuron	Neuron	342	3824	2206	507	821	4050
ARCME-NEURO4	ARCME	n04.Sst-Nts	Sst/Nts	Neuron	Neuron	70	3169	2486	274	571	3772
ARCME-NEURO5	ARCME	n05.Nfix-Htr2c	Nfix/Htr2c	Neuron	Neuron	35	2241	1401	164	388	2591
ARCME-NEURO6	ARCME	n06.Oxt	Oxt	Neuron	Neuron	36	1467	1501	218	532	2127
ARCME-NEURO7	ARCME	n07	Arx/Nr5a2	Neuron	Neuron	279	2408	955	574	844	2604
ARCME-NEURO8	ARCME	n08	Th/Slc6a3	Neuron	Neuron	287	2810	1098	454	533	2935
ARCME-NEURO9	ARCME	n09.Th-Slc6a3	Th/Slc6a3	Neuron	Neuron	202	2063	816	463	698	2227
ARCME-NG21	ARCME	s28.NG2_OPC1	Nusap1/Nuf2/Tacc3	Glia	Oligodendrocyte	23	1466	938	468	943	1588
ARCME-NG22	ARCME	s29.NG2_OPC2	C1ql1/Pdgfra/Lhfpl3	Glia	Oligodendrocyte	604	2380	1577	1451	1871	2790
ARCME-OLIGO1	ARCME	s03.Oligodendro1	Gm15440/Tmem2/Cnksr3	Glia	Oligodendrocyte	23	1449	1387	549	1034	1701
ARCME-OLIGO2	ARCME	s04.Oligodendro2	Aplp1/Gstp1/Endod1	Glia	Oligodendrocyte	12	1383	1665	389	946	1840
ARCME-OLIGO3	ARCME	s05.Oligodendro3	Mal/Mog/Opalin	Glia	Oligodendrocyte	96	1695	1477	967	1261	1888
ARCME-OLIGO4	ARCME	s06.Oligodendro4	Car2/Trf/Gm21984	Glia	Oligodendrocyte	392	1736	1547	1586	1570	2084
ARCME-OLIGO5	ARCME	s07.Oligodendro5	Bcas1/Fyn/Tnr	Glia	Oligodendrocyte	39	1616	1528	383	890	1914
ARCME-OLIGO6	ARCME	s27.Oligodendro6	Gpr17/Fyn/Lims2	Glia	Oligodendrocyte	185	2236	1605	888	1346	2475
ARCME-OTHER1	ARCME	n33.unassigned(1)	unassigned-1	Other	Other	420	2030	650	537	729	2258
ARCME-OTHER2	ARCME	n34.unassigned(2)	unassigned-2	Other	Other	1381	2510	1276	894	1305	3100
ARCME-PATU1	ARCME	s08.Pars_Tuber1A	Chga/Chgb/Apoc3	Endocrine	Pars tuberalis	42	3379	4332	254	1072	4748
ARCME-PATU2	ARCME	s09.Pars_Tuber1B	Wfdc2/Anxa1/Cyp2f2	Endocrine	Pars tuberalis	15	1230	948	442	1066	1445
ARCME-PATU3	ARCME	s10.Pars_Tuber1C	Epcam/Cyp2f2/Mia	Endocrine	Pars tuberalis	93	3305	3614	644	1994	4018
ARCME-PATU4	ARCME	s19.Parstuber2A	Chgb/Apoc3/Ces1d	Endocrine	Pars tuberalis	230	2153	1687	929	1784	2483
ARCME-PATU5	ARCME	s20.Parstuber2B	Cga/Scg2/Pcsk1	Endocrine	Pars tuberalis	8	571	516	408	692	858
ARCME-PVM1	ARCME	s14.PVMs	Gusb/Lyz2/Mrc1	Immune	Macrophage	26	1388	1094	670	1271	1526
ARCME-TANY1	ARCME	s30.b2_tanycytes1	Ppp1r1b/Lix1/Scn7a	Glia	Tanycyte	592	2896	2063	1447	1823	3317
ARCME-TANY2	ARCME	s31.b2_tanycytes2	Scn7a/Cldn10/Fndc3c1	Glia	Tanycyte	592	3136	2321	1523	2100	3526
ARCME-TANY3	ARCME	s33.a1_tanycytes2	Tspan7/Ldha/Pole4	Glia	Tanycyte	68	1594	1188	591	1355	1869
ARCME-TANY4	ARCME	s34.a1_tanycytes1	Ntrk2/Tgfb2/Gpr50	Glia	Tanycyte	334	2381	2006	1319	1918	2714
ARCME-TANY5	ARCME	s35.b1_tanycytes	6330403K07Rik/Crym/Frzb	Glia	Tanycyte	1933	2693	2628	1986	2373	3640
ARCME-TANY6	ARCME	s36.a2_tanycytes	Pdzph1/Kctd14/6330403K07Rik	Glia	Tanycyte	1169	2315	2005	1802	2212	3129
HYPC-ASTRO1	HYPC	Astro	Gja1/Ppap2b	Glia	Astrocyte	45	981	746	788	1225	1522
HYPC-EPENDY1	HYPC	Ependy	Rarres2/Dbi	Glia	Ependymal	123	2264	2204	1730	2131	2724
HYPC-EPITH1	HYPC	Epith1	Itm2a/Slco1a4	Vascular	Epithelial	60	1891	1675	1276	1828	2181
HYPC-EPITH2	HYPC	Epith2	Timp3/Slc9a3r2	Vascular	Epithelial	58	2148	1889	1270	1891	2393
HYPC-MACRO1	HYPC	Macro	Pf4/Lyz2	Immune	Macrophage	14	1483	1433	567	1642	1911
HYPC-MICRO1	HYPC	Micro	Hexb/Ctss	Immune	Microglia	23	924	751	518	985	1293
HYPC-MO1	HYPC	MO	Mog/Plp1	Glia	Oligodendrocyte	265	1338	1160	1604	1424	2076
HYPC-NEURO1	HYPC	GABA1	Pvalb/Cplx3	Neuron	Neuron	10	1142	479	322	327	1282
HYPC-NEURO10	HYPC	GABA18	1500016L03Rik/Coch	Neuron	Neuron	23	1172	446	192	180	1309
HYPC-NEURO11	HYPC	GABA2	St18/Npas1	Neuron	Neuron	19	991	308	357	288	1141
HYPC-NEURO12	HYPC	GABA3	Meis2/Arpp21	Neuron	Neuron	42	1351	594	667	568	1575
HYPC-NEURO13	HYPC	GABA4	Arx/Gm13498	Neuron	Neuron	13	975	399	169	227	1120
HYPC-NEURO14	HYPC	GABA5	Lhx6/Lhx8	Neuron	Neuron	48	1733	879	496	468	2007
HYPC-NEURO15	HYPC	GABA6	Pax6/Myh7	Neuron	Neuron	28	1141	504	397	414	1376
HYPC-NEURO16	HYPC	GABA7	Th/Unc13c	Neuron	Neuron	13	963	431	378	417	1102
HYPC-NEURO17	HYPC	GABA8	Dlk1/Vgf	Neuron	Neuron	115	1108	247	527	266	1391
HYPC-NEURO18	HYPC	GABA9	1500016L03Rik/Lhx1	Neuron	Neuron	23	850	289	385	292	991
HYPC-NEURO19	HYPC	Glu1	Rasd1/Rgs2	Neuron	Neuron	11	599	192	242	149	686
HYPC-NEURO2	HYPC	GABA10	Prok2/Gal	Neuron	Neuron	14	1290	886	224	324	1569
HYPC-NEURO20	HYPC	Glu10	Trh/Bdnf	Neuron	Neuron	12	662	242	194	196	750
HYPC-NEURO21	HYPC	Glu11	Tac2/Kiss1	Neuron	Neuron	30	1084	397	426	303	1246
HYPC-NEURO22	HYPC	Glu12	Lhx9/Vgll2	Neuron	Neuron	17	956	486	203	281	1140
HYPC-NEURO23	HYPC	Glu13	Pomc/Cartpt	Neuron	Neuron	16	998	287	268	188	1120
HYPC-NEURO24	HYPC	Glu14	Avp/Pcsk1	Neuron	Neuron	30	1246	607	319	247	1485
HYPC-NEURO25	HYPC	Glu15	Sst/Nhlh2	Neuron	Neuron	22	1109	459	261	241	1297
HYPC-NEURO26	HYPC	Glu2	Sln/Calb2	Neuron	Neuron	13	917	361	349	355	1029
HYPC-NEURO27	HYPC	Glu3	Nrn1/Fezf2	Neuron	Neuron	10	902	305	304	313	997
HYPC-NEURO28	HYPC	Glu4	Tcf7l2/Shox2	Neuron	Neuron	68	1978	957	447	467	2178
HYPC-NEURO29	HYPC	Glu5	Foxb1/Cpne9	Neuron	Neuron	83	1794	982	654	563	2116
HYPC-NEURO3	HYPC	GABA11	Ghrh/Gal	Neuron	Neuron	25	1221	464	422	297	1396
HYPC-NEURO30	HYPC	Glu6	Tac1/Aldh3b2	Neuron	Neuron	19	1455	996	253	412	1760
HYPC-NEURO31	HYPC	Glu7	Nrgn/Fezf1	Neuron	Neuron	96	1886	742	587	430	2141
HYPC-NEURO32	HYPC	Glu8	Ptprr/Lhx9	Neuron	Neuron	37	1777	873	279	280	2020
HYPC-NEURO33	HYPC	Glu9	Samd3/Gng8	Neuron	Neuron	26	1137	404	265	211	1291
HYPC-NEURO34	HYPC	Hista	Prph/Wif1	Neuron	Neuron	11	1002	532	325	427	1164
HYPC-NEURO4	HYPC	GABA12	Crabp1/Tbx3	Neuron	Neuron	38	1376	725	334	371	1620
HYPC-NEURO5	HYPC	GABA13	Gal/Hmx3	Neuron	Neuron	113	1981	885	439	272	2280
HYPC-NEURO6	HYPC	GABA14	Sst/Sstr1	Neuron	Neuron	42	1446	564	432	312	1667
HYPC-NEURO7	HYPC	GABA15	Npy/Agrp	Neuron	Neuron	68	1678	787	601	393	2046
HYPC-NEURO8	HYPC	GABA16	Asb4/Cox6a2	Neuron	Neuron	50	1295	424	478	343	1553
HYPC-NEURO9	HYPC	GABA17	Prlr/Slc18a2	Neuron	Neuron	30	1645	770	319	316	1854
HYPC-OLIGO1	HYPC	IMO	Fyn/Bcas1	Glia	Oligodendrocyte	68	1395	823	1316	1217	1895
HYPC-OPC1	HYPC	OPC	Serpine2/Olig1	Glia	Oligodendrocyte	248	1643	1298	1503	1618	2344
HYPC-OPC2	HYPC	POPC	Top2a/Cdca3	Glia	Oligodendrocyte	23	1078	536	578	774	1265
HYPC-TANY1	HYPC	Tany	Prdx6/Cst3	Glia	Tanycyte	123	2037	1872	1445	1886	2591
HYPR-ASTRO1	HYPR	astrocytes	NA	Glia	Astrocyte	267	713	602	1669	1578	1922
HYPR-EPENDY1	HYPR	ependymal	NA	Glia	Ependymal	356	1615	1614	1783	1884	2529
HYPR-EPI1	HYPR	endothelial	NA	Vascular	Epithelial	240	1294	1202	1686	1813	2156
HYPR-MICRO1	HYPR	microglia	NA	Immune	Microglia	48	506	440	1348	1282	1424
HYPR-MURAL1	HYPR	vsm	NA	Vascular	Mural	71	660	557	1607	1684	1815
HYPR-NEURO1	HYPR	Adcyap1_1_Tac1	Adcyap1/Tac1	Neuron	Neuron	14	1482	867	249	148	1722
HYPR-NEURO10	HYPR	Dopamine_2_low_VMAT2	Dopamine/VMAT2	Neuron	Neuron	7	955	579	248	133	1178
HYPR-NEURO11	HYPR	Dopamine_3	Dopamine	Neuron	Neuron	12	1688	2068	182	262	2464
HYPR-NEURO12	HYPR	Dopamine_4	Dopamine	Neuron	Neuron	5	1038	933	123	130	1472
HYPR-NEURO13	HYPR	GABA_10	GABA	Neuron	Neuron	20	1844	1109	326	185	2150
HYPR-NEURO14	HYPR	GABA_11_Nts_1	GABA/Nts	Neuron	Neuron	25	2280	2124	171	137	2733
HYPR-NEURO15	HYPR	GABA_12_Nts_2	GABA/Nts	Neuron	Neuron	26	2212	1874	214	124	2581
HYPR-NEURO16	HYPR	GABA_13_Galanin	GABA/Galanin	Neuron	Neuron	23	1905	1274	216	97	2165
HYPR-NEURO17	HYPR	GABA_14_Npy_Agrp	GABA/Npy/Agrp	Neuron	Neuron	13	1174	734	283	255	1491
HYPR-NEURO18	HYPR	GABA_15_Npynegmedium	GABA/Npynegmedium	Neuron	Neuron	7	912	842	215	369	1287
HYPR-NEURO19	HYPR	GABA_2_Gucy1a3	GABA/Gucy1a3	Neuron	Neuron	19	1585	1048	272	167	1958
HYPR-NEURO2	HYPR	Adcyap1_2	Adcyap1	Neuron	Neuron	20	1812	1360	293	189	2171
HYPR-NEURO20	HYPR	GABA_3_Crhpos_neg_Lhx6	GABA/Crhpos/Lhx6	Neuron	Neuron	20	2011	1347	222	126	2285
HYPR-NEURO21	HYPR	GABA_4_Crhpos_neg_Pgr15l	GABA/Crhpos/Pgr15l	Neuron	Neuron	24	1619	905	373	226	1868
HYPR-NEURO22	HYPR	GABA_5_Calcr_Lhx1	GABA/Calcr/Lhx1	Neuron	Neuron	32	1771	1036	487	298	2124
HYPR-NEURO23	HYPR	GABA_6_Otof_Lhx1	GABA/Otof/Lhx1	Neuron	Neuron	24	1186	629	368	218	1392
HYPR-NEURO24	HYPR	GABA_7_Pomcpos_neg	GABA/Pomcpos	Neuron	Neuron	27	1456	963	473	283	1780
HYPR-NEURO25	HYPR	GABA_8	GABA	Neuron	Neuron	15	1532	1457	376	311	1959
HYPR-NEURO26	HYPR	GABA_9	GABA	Neuron	Neuron	22	1995	1387	213	126	2240
HYPR-NEURO27	HYPR	GABA1	GABA1	Neuron	Neuron	14	1630	1298	256	229	1982
HYPR-NEURO28	HYPR	Gadneglow_Gnrhneg_pos	Gadneglow/Gnrhneg	Neuron	Neuron	9	827	481	418	334	1095
HYPR-NEURO29	HYPR	Hcrt	Hcrt	Neuron	Neuron	14	1226	811	380	246	1515
HYPR-NEURO3	HYPR	Avp_1_high	Avp	Neuron	Neuron	9	1072	658	419	297	1356
HYPR-NEURO30	HYPR	Hmitpos_neg	Hmitpos	Neuron	Neuron	24	1338	966	432	310	1676
HYPR-NEURO31	HYPR	Npvf	Npvf	Neuron	Neuron	6	634	474	274	214	884
HYPR-NEURO32	HYPR	Oxytocin_1	Oxytocin	Neuron	Neuron	9	1105	897	241	198	1507
HYPR-NEURO33	HYPR	Oxytocin_2	Oxytocin	Neuron	Neuron	7	730	652	102	79	1029
HYPR-NEURO34	HYPR	Oxytocin_3	Oxytocin	Neuron	Neuron	11	952	898	356	402	1439
HYPR-NEURO35	HYPR	Oxytocin_4	Oxytocin	Neuron	Neuron	10	1110	724	309	199	1379
HYPR-NEURO36	HYPR	Pmch	Pmch	Neuron	Neuron	4	254	387	103	80	515
HYPR-NEURO37	HYPR	Sst_1_low	Sst	Neuron	Neuron	17	1427	846	289	174	1703
HYPR-NEURO38	HYPR	Sst_2_high	Sst	Neuron	Neuron	9	1054	704	326	228	1325
HYPR-NEURO39	HYPR	Sst_3_medium	Sst	Neuron	Neuron	12	1149	960	327	277	1554
HYPR-NEURO4	HYPR	Avp_2_high	Avp	Neuron	Neuron	8	913	982	236	311	1348
HYPR-NEURO40	HYPR	Trh_1_low	Trh	Neuron	Neuron	26	1520	837	561	329	1847
HYPR-NEURO41	HYPR	Trh_2_medium	Trh	Neuron	Neuron	20	1481	1023	419	308	1775
HYPR-NEURO42	HYPR	Trh_3_high	Trh	Neuron	Neuron	9	1002	668	286	227	1285
HYPR-NEURO43	HYPR	Vglut2_11	Vglut2	Neuron	Neuron	12	2021	1958	202	331	2613
HYPR-NEURO44	HYPR	Vglut2_12_Mgat4b	Vglut2/Mgat4b	Neuron	Neuron	4	990	1200	103	235	1479
HYPR-NEURO45	HYPR	Vglut2_13Ninl_Rfx5_Zfp346	Vglut2/Ninl/Rfx5/Zfp346	Neuron	Neuron	5	1159	1388	81	190	1647
HYPR-NEURO46	HYPR	Vglut2_14_Col9a2	Vglut2/Col9a2	Neuron	Neuron	5	844	496	326	295	1049
HYPR-NEURO47	HYPR	Vglut2_15_Hcn1_6430411K18Rik	Vglut2/Hcn1/K18Rik	Neuron	Neuron	4	1033	962	226	324	1362
HYPR-NEURO48	HYPR	Vglut2_2_Crhpos_neg	Vglut2/Crhpos	Neuron	Neuron	15	966	505	302	158	1277
HYPR-NEURO49	HYPR	Vglut2_3_Crhnegpos_neg_low	Vglut2/Crhnegpos	Neuron	Neuron	40	1607	699	463	220	1931
HYPR-NEURO5	HYPR	Avp_3_medium	Avp	Neuron	Neuron	8	993	684	265	176	1212
HYPR-NEURO50	HYPR	Vglut2_4	Vglut2	Neuron	Neuron	4	933	884	240	238	1319
HYPR-NEURO51	HYPR	Vglut2_6_Prmt8_Ugdh	Vglut2/Prmt8/Ugdh	Neuron	Neuron	11	1160	735	164	131	1345
HYPR-NEURO52	HYPR	Vglut2_7_Pgam_Snx12	Vglut2/Pgam/Snx12	Neuron	Neuron	6	837	437	478	350	1079
HYPR-NEURO53	HYPR	Vglut2_8	Vglut2	Neuron	Neuron	9	794	428	493	322	1023
HYPR-NEURO54	HYPR	Vglut2_9_Gpr149	Vglut2/Gpr149	Neuron	Neuron	6	769	408	380	264	968
HYPR-NEURO6	HYPR	circadian_1_Vip_Grppos_neg	circadian/Vip/Grppos	Neuron	Neuron	6	596	254	497	303	804
HYPR-NEURO7	HYPR	circadian_2_Nms_VIPpos_neg	circadian/Nms/VIPpos	Neuron	Neuron	12	746	340	541	300	983
HYPR-NEURO8	HYPR	circadian_3_Per2	circadian/Per2	Neuron	Neuron	13	631	178	468	178	880
HYPR-NEURO9	HYPR	Dopamine_1	Dopamine	Neuron	Neuron	17	1666	1218	141	113	2034
HYPR-OLIGO1	HYPR	oligos	NA	Glia	Oligodendrocyte	1001	1316	1236	1652	1297	2117
LHA-ASTRO1	LHA	Nonneuronal_6	Slc7a10/Gja1/Aqp4/Agt	Glia	Astrocyte	358	1274	984	2000	2002	2361
LHA-ASTRO2	LHA	Nonneuronal_8	Gfap/Gja1/Aqp4/Agt	Glia	Astrocyte	22	1169	920	535	1342	1503
LHA-EPI1	LHA	Nonneuronal_2	Flt1	Vascular	Epithelial	303	2327	1877	1942	2348	2682
LHA-FIBRO1	LHA	Nonneuronal_5	Pdgfra/Col1a2/Gja1	Other	Fibroblast	56	1593	1253	1062	1930	2124
LHA-MACRO1	LHA	Nonneuronal_7	C1qa/Cx3cr1/Mrc1	Immune	Macrophage	27	933	748	729	1348	1411
LHA-MICRO1	LHA	Nonneuronal_10	C1qa/Cx3cr1/Tmem119	Immune	Microglia	71	1065	775	1260	1574	1663
LHA-MURAL1	LHA	Nonneuronal_9	Cspg4/Acta2	Vascular	Mural	35	1023	741	790	1267	1420
LHA-NEURO1	LHA	GABA_1	Slc32a1/Gal/Dlk1	Neuron	Neuron	450	4972	4917	585	1365	5641
LHA-NEURO10	LHA	GABA_10	Slc32a1/Sst/Meis2	Neuron	Neuron	60	2516	1125	231	441	2713
LHA-NEURO11	LHA	GABA_11	Slc32a1/Col25a/Otp	Neuron	Neuron	58	2449	1237	341	587	2610
LHA-NEURO12	LHA	GABA_12	Slc32a1/Th/Slc18a	Neuron	Neuron	45	2700	1693	157	354	3034
LHA-NEURO13	LHA	GABA_13	Slc32a1/Sst/Otp	Neuron	Neuron	70	2437	1295	418	620	2591
LHA-NEURO14	LHA	GABA_14	Slc32a1/Atp1a	Neuron	Neuron	65	1801	945	274	638	2080
LHA-NEURO15	LHA	GABA_15	Slc32a1/Calb1/Cbln4	Neuron	Neuron	44	1997	809	193	395	2096
LHA-NEURO16	LHA	Glut_1	Slc17a6/Pmch/Gad1	Neuron	Neuron	119	3325	4809	544	1064	5194
LHA-NEURO17	LHA	Glut_2	Slc17a6/Nrgn/Gda	Neuron	Neuron	186	4362	3643	431	833	4691
LHA-NEURO18	LHA	Glut_3	Slc17a6/Zic1/Gad1	Neuron	Neuron	59	2803	1404	245	471	2950
LHA-NEURO19	LHA	Glut_4	Slc17a6/Tac1/Pitx2	Neuron	Neuron	93	3403	2824	245	734	3908
LHA-NEURO2	LHA	GABA_2	Slc32a1/Npy/Npw	Neuron	Neuron	125	2145	727	334	495	2235
LHA-NEURO20	LHA	Glut_5	Slc17a6/Ebf3/Otp	Neuron	Neuron	300	4597	4434	493	1196	5189
LHA-NEURO21	LHA	Glut_6	Slc17a6/Hcrt	Neuron	Neuron	162	3636	4095	657	1049	4678
LHA-NEURO22	LHA	Glut_7	Slc17a6/Gpr101/Tcf4	Neuron	Neuron	41	1937	604	167	251	2053
LHA-NEURO23	LHA	Glut_8	Slc17a6/Trh/Cbln2	Neuron	Neuron	52	3028	1723	122	302	3326
LHA-NEURO24	LHA	Glut_9	Slc17a6/Synpr/Gad1	Neuron	Neuron	181	4232	3251	500	917	4504
LHA-NEURO25	LHA	Glut_10	Slc17a6/Grp/Cck	Neuron	Neuron	49	1889	906	268	519	2062
LHA-NEURO26	LHA	Glut_11	Slc17a6/Calca/Col27a	Neuron	Neuron	47	1238	566	391	711	1486
LHA-NEURO27	LHA	Glut_12	Slc17a6/Trh/Syt2	Neuron	Neuron	79	3743	3786	319	763	4563
LHA-NEURO28	LHA	Glut_13	Slc17a6/Syt2/Meis2_Gad1	Neuron	Neuron	54	2763	1943	290	673	3105
LHA-NEURO29	LHA	Glut_14	Slc17a6/Otp/Gpr101	Neuron	Neuron	75	3322	2183	184	420	3624
LHA-NEURO3	LHA	GABA_3	Slc32a1/Nts/Cartpt	Neuron	Neuron	75	3307	2875	351	731	3773
LHA-NEURO30	LHA	Glut_15	Slc17a6/Sst	Neuron	Neuron	40	1987	988	275	558	2163
LHA-NEURO4	LHA	GABA_4	Slc32a1/Unassigned	Neuron	Neuron	58	1540	709	584	1341	1819
LHA-NEURO5	LHA	GABA_5	Slc32a1/Meis2/Calb2	Neuron	Neuron	210	4115	3696	364	852	4585
LHA-NEURO6	LHA	GABA_6	Slc32a1/Sst/Col25a	Neuron	Neuron	27	2217	1430	170	430	2539
LHA-NEURO7	LHA	GABA_7	Slc32a1/Tac2/Serpini1	Neuron	Neuron	466	5458	5665	660	1589	6193
LHA-NEURO8	LHA	GABA_8	Slc32a1/Lhx/Tcf4	Neuron	Neuron	103	2825	1512	335	631	3098
LHA-NEURO9	LHA	GABA_9	Slc32a1/Cbln2/Calb1	Neuron	Neuron	44	2786	1440	208	489	3007
LHA-OLIGO1	LHA	Nonneuronal_1	Olig1/Mag/Opalin	Glia	Oligodendrocyte	1196	1285	1294	2677	2076	2689
LHA-OPC1	LHA	Nonneuronal_13	Olig1/Mag/Pdgfra/Fyn	Glia	Oligodendrocyte	182	2171	1513	1508	2110	2580
LHA-OPC2	LHA	Nonneuronal_3	Olig1/Cspg4/Pdgfra	Glia	Oligodendrocyte	186	1400	847	1432	1994	2287
LHA-OTHER1	LHA	Nonneuronal_11	doublets	Other	Other	33	1405	1109	587	1333	1666
LHA-OTHER2	LHA	Nonneuronal_12	doublets	Other	Other	21	1646	1298	181	658	2156
LHA-RBC1	LHA	Nonneuronal_4	Hba-a1	Other	RBC	46	29	33	1385	907	1385
POA-ASTRO1	POA	Astrocytes_1	NA	Glia	Astrocyte	793	1986	1533	1996	2411	2858
POA-ASTRO2	POA	Astrocytes_2	NA	Glia	Astrocyte	64	1458	1057	983	1722	1879
POA-EPENDY1	POA	Ependymal_1	NA	Glia	Ependymal	69	1989	1408	934	1730	2288
POA-EPI1	POA	Endothelial_1	NA	Vascular	Epithelial	467	2510	1971	1948	2388	3040
POA-EPI2	POA	Endothelial_2	NA	Vascular	Epithelial	39	1083	1131	794	1644	1687
POA-EPI3	POA	Endothelial_3	NA	Vascular	Epithelial	35	1802	1591	828	1799	2117
POA-FIBRO1	POA	Fibroblast_1	NA	Other	Fibroblast	72	2052	1739	930	1827	2301
POA-MACRO1	POA	Macrophage_1	NA	Immune	Macrophage	79	1439	1244	912	1691	1911
POA-MICRO1	POA	Microglia_1	NA	Immune	Microglia	767	2092	1968	2606	2508	2934
POA-MICRO2	POA	Microglia_2	NA	Immune	Microglia	61	1552	1183	1048	1758	1908
POA-MURAL1	POA	Mural_1	NA	Vascular	Mural	364	2147	1603	1718	2054	2617
POA-MURAL2	POA	Mural_2	NA	Vascular	Mural	149	1795	1449	1560	2077	2329
POA-NEURO1	POA	e1_Glut	Glut	Neuron	Neuron	573	4369	2483	680	831	4889
POA-NEURO10	POA	e2_Tac1_Fezf1	Tac1/Fezf1	Neuron	Neuron	389	4816	3737	631	1041	5379
POA-NEURO11	POA	e20_Crh	Crh	Neuron	Neuron	49	2641	1891	331	637	3232
POA-NEURO12	POA	e21_Glut_Rxpf3	Glut/Rxpf3	Neuron	Neuron	46	2770	1533	478	1015	3053
POA-NEURO13	POA	e22_Gal_Ucn3	Gal/Ucn3	Neuron	Neuron	25	1801	1056	278	397	2159
POA-NEURO14	POA	e23_Reln_Etv1	Reln/Etv1	Neuron	Neuron	22	2017	1240	337	575	2426
POA-NEURO15	POA	e24_Gal_Rxfp1_	Gal/Rxfp1	Neuron	Neuron	18	1846	1222	269	465	2187
POA-NEURO16	POA	e3_Cartpt_Isl1	Cartpt/Isl1	Neuron	Neuron	269	4893	3447	598	808	5422
POA-NEURO17	POA	e4_Trh_Angpt1	Trh/Angpt1	Neuron	Neuron	219	4205	3070	535	812	4779
POA-NEURO18	POA	e5_Adcyap1_Nkx2.1	Adcyap1/Nkx2	Neuron	Neuron	211	4974	3432	496	724	5421
POA-NEURO19	POA	e6_Nos1_Trp73	Nos1/Trp73	Neuron	Neuron	207	4065	2359	553	891	4383
POA-NEURO2	POA	e10_Glut_Meis2	Glut/Meis2	Neuron	Neuron	151	3983	2677	497	817	4442
POA-NEURO20	POA	e7_Reln_C1ql1	Reln/C1ql1	Neuron	Neuron	171	3578	2002	521	726	4011
POA-NEURO21	POA	e8_Cck_Ebf3	Cck/Ebf3	Neuron	Neuron	168	2029	1055	713	785	2313
POA-NEURO22	POA	e9_Glut_Tcf7l2	Glut/Tcf7l2	Neuron	Neuron	167	3579	1986	556	863	3820
POA-NEURO23	POA	h1_Gaba_Slc17a6	Gaba/Slc17a6	Neuron	Neuron	89	2508	1038	304	558	2752
POA-NEURO24	POA	h2_Nts_Slc17a8	Nts/Slc17a8	Neuron	Neuron	317	4625	3234	611	985	5049
POA-NEURO25	POA	h3_Slc32a1_Gsc	Slc32a1/Gsc	Neuron	Neuron	111	3683	1721	387	592	3999
POA-NEURO26	POA	i1_Gaba	Gaba	Neuron	Neuron	1343	4303	2962	748	1513	4950
POA-NEURO27	POA	i10_Tac1_Nts	Tac1/Nts	Neuron	Neuron	573	4861	3356	1276	1496	5255
POA-NEURO28	POA	i11_Gaba	Gaba	Neuron	Neuron	570	4058	2662	1033	1320	4659
POA-NEURO29	POA	i12_Gaba	Gaba	Neuron	Neuron	447	4163	2365	552	625	4604
POA-NEURO3	POA	e11_Glut_Shox2	Glut/Shox2	Neuron	Neuron	133	3692	2084	484	745	4069
POA-NEURO30	POA	i13_Gaba	Gaba	Neuron	Neuron	434	4468	2902	731	1087	4836
POA-NEURO31	POA	i14_Avp_Cck	Avp/Cck	Neuron	Neuron	356	2989	1546	935	921	3307
POA-NEURO32	POA	i15_Gaba	Gaba	Neuron	Neuron	348	5177	3345	561	651	5581
POA-NEURO33	POA	i16_Gal_Th	Gal/Th	Neuron	Neuron	347	4905	4240	632	823	5626
POA-NEURO34	POA	i17_Th_Nos1	Th/Nos1	Neuron	Neuron	334	4345	2505	563	803	4702
POA-NEURO35	POA	i18_Gal_Tac2	Gal/Tac2	Neuron	Neuron	331	4426	3107	528	793	4939
POA-NEURO36	POA	i2_Tac1_Pdyn	Tac1/Pdyn	Neuron	Neuron	1065	4568	3296	1534	1797	5112
POA-NEURO37	POA	i20_Gal_Moxd1	Gal/Moxd1	Neuron	Neuron	297	4369	2404	625	687	4762
POA-NEURO38	POA	i21_Sst_Pou3f3	Sst/Pou3f3	Neuron	Neuron	272	4355	2756	692	895	4699
POA-NEURO39	POA	i22_Gal_Pmaip1	Gal/Pmaip1	Neuron	Neuron	246	3350	1860	613	738	3792
POA-NEURO4	POA	e12_Nos1_Foxp2	Nos1/Foxp2	Neuron	Neuron	127	3401	2307	417	864	3899
POA-NEURO40	POA	i23_Crh_Nts	Crh/Nts	Neuron	Neuron	235	4076	2613	530	934	4412
POA-NEURO41	POA	i24_Nmu	Nmu	Neuron	Neuron	215	4370	2775	529	711	4791
POA-NEURO42	POA	i25_Npy_Etv1	Npy/Etv1	Neuron	Neuron	213	3641	2151	667	991	4011
POA-NEURO43	POA	i26_Tac1_Prok2	Tac1/Prok2	Neuron	Neuron	189	1350	633	909	1050	1666
POA-NEURO44	POA	i27_Th_Trh	Th/Trh	Neuron	Neuron	159	3451	1737	449	585	3756
POA-NEURO45	POA	i28_Gaba_Six6	Gaba/Six6	Neuron	Neuron	158	3831	1788	362	440	4177
POA-NEURO46	POA	i29_Gaba_Igsf1	Gaba/Igsf1	Neuron	Neuron	155	3891	2578	479	792	4380
POA-NEURO47	POA	i3_Penk_Nts	Penk/Nts	Neuron	Neuron	984	3920	2653	1593	1691	4449
POA-NEURO48	POA	i30_Vip	Vip	Neuron	Neuron	150	1920	1039	737	841	2239
POA-NEURO49	POA	i31_Calca	Calca	Neuron	Neuron	129	2713	1189	390	493	3056
POA-NEURO5	POA	e13_Ghrh_C1ql1	Ghrh/C1ql1	Neuron	Neuron	115	3886	2184	410	585	4242
POA-NEURO50	POA	i32_Sst_Npy	Sst/Npy	Neuron	Neuron	122	2185	1061	464	607	2491
POA-NEURO51	POA	i35_Crh_Tac2	Crh/Tac2	Neuron	Neuron	103	3019	1117	296	367	3248
POA-NEURO52	POA	i37_Bdnf_Chrm2	Bdnf/Chrm2	Neuron	Neuron	87	2937	1707	502	851	3247
POA-NEURO53	POA	i38_Kiss1_Th	Kiss1/Th	Neuron	Neuron	67	2583	1182	303	462	2955
POA-NEURO54	POA	i39_Gaba	Gaba	Neuron	Neuron	54	2224	945	236	359	2494
POA-NEURO55	POA	i4_Gaba_Mylk	Gaba/Mylk	Neuron	Neuron	873	3578	1869	1449	1467	4098
POA-NEURO56	POA	i40_Sst_Reln	Sst/Reln	Neuron	Neuron	46	2045	1108	319	624	2311
POA-NEURO57	POA	i41_Npy_Penk	Npy/Penk	Neuron	Neuron	42	2164	983	270	402	2419
POA-NEURO58	POA	i42_Pthlh	Pthlh	Neuron	Neuron	40	2090	1065	317	542	2368
POA-NEURO59	POA	i43_Chat	Chat	Neuron	Neuron	38	2006	1401	337	680	2447
POA-NEURO6	POA	e15_Ucn3_Brs3	Ucn3/Brs3	Neuron	Neuron	110	3697	2245	412	767	4081
POA-NEURO60	POA	i44_Th_Cxcl14	Th/Cxcl14	Neuron	Neuron	30	1866	1135	405	632	2139
POA-NEURO61	POA	i45_Bdnf_Pmaip1	Bdnf/Pmaip1	Neuron	Neuron	26	1148	476	358	582	1345
POA-NEURO62	POA	i5_Gaba_Pou3f3	Gaba/Pou3f3	Neuron	Neuron	784	5260	4224	989	1507	5752
POA-NEURO63	POA	i6_Avp_Nms	Avp/Nms	Neuron	Neuron	751	3113	2156	1350	1332	3673
POA-NEURO64	POA	i7_Gaba	Gaba	Neuron	Neuron	711	5600	4948	780	1135	6412
POA-NEURO65	POA	i8_Gal_Amigo2	Gal/Amigo2	Neuron	Neuron	705	5202	3504	645	630	5729
POA-NEURO66	POA	i9_Gaba	Gaba	Neuron	Neuron	607	4692	2978	612	672	5252
POA-NEURO7	POA	e16_Sst_Cartpt	Sst/Cartpt	Neuron	Neuron	92	2729	1706	433	571	3174
POA-NEURO8	POA	e17_Th_Adcyap1	Th/Adcyap1	Neuron	Neuron	77	3086	2753	429	836	4046
POA-NEURO9	POA	e19_Ghrh_Trh	Ghrh/Trh	Neuron	Neuron	61	2741	1820	300	669	3175
POA-OLIGO3	POA	Mature_oligodendrocyte_1	mature	Glia	Oligodendrocyte	3561	1617	1453	2697	2459	3154
POA-OLIGO4	POA	Mature_oligodendrocyte_2	mature	Glia	Oligodendrocyte	1637	2072	1695	2872	2445	3110
POA-OLIGO5	POA	Mature_oligodendrocyte_3	mature	Glia	Oligodendrocyte	620	2234	1860	2401	2334	2894
POA-OLIGO6	POA	Mature_oligodendrocyte_4	mature	Glia	Oligodendrocyte	578	3002	2813	2011	2135	3516
POA-OLIGO7	POA	Mature_oligodendrocyte_5	mature	Glia	Oligodendrocyte	262	3471	4666	1192	2072	5116
POA-OLIGO8	POA	Mature_oligodendrocyte_6	mature	Glia	Oligodendrocyte	49	1124	584	853	1084	1369
POA-OLIGO9	POA	Newly_formed_oligodendrocyte_1	newly-formed	Glia	Oligodendrocyte	459	3319	2313	1804	2326	3815
POA-OPC1	POA	Immature_oligodendrocyte_1	immature	Glia	Oligodendrocyte	1632	3493	2426	2196	2678	4249
POA-OPC2	POA	Immature_oligodendrocyte_2	immature	Glia	Oligodendrocyte	60	2740	1984	770	1787	3040
VMH-ASTRO1	VMH	Astro_Aqp4	Aqp4	Glia	Astrocyte	18	2112	1606	1052	2705	2886
VMH-EPI1	VMH	Endo_Gja5	Gja5	Vascular	Epithelial	6	1853	1344	586	1547	2039
VMH-MICRO1	VMH	Micro_Siglech	Siglech	Immune	Microglia	48	2123	1758	1737	2773	2934
VMH-NEURO1	VMH	Clic4	Clic4	Neuron	Neuron	12	1624	1504	331	940	2301
VMH-NEURO10	VMH	Esr1_3_Samd9l_Nmur2	Esr1/Samd9l/Nmur2	Neuron	Neuron	100	1878	700	484	456	2191
VMH-NEURO11	VMH	Esr1_4_Smoc2	Esr1/Smoc2	Neuron	Neuron	150	2608	904	431	434	2944
VMH-NEURO12	VMH	Esr1_5_Ngf	Esr1/Ngf	Neuron	Neuron	148	2296	1415	743	969	2969
VMH-NEURO13	VMH	Esr1_6_Ctxn3	Esr1/Ctxn3	Neuron	Neuron	122	2077	776	358	414	2481
VMH-NEURO14	VMH	Irx5	Irx5	Neuron	Neuron	13	1981	1243	274	674	2542
VMH-NEURO15	VMH	Lhx1_1	Lhx1	Neuron	Neuron	25	2150	886	535	1024	2401
VMH-NEURO16	VMH	Lhx1_2	Lhx1	Neuron	Neuron	11	1751	1022	371	917	2185
VMH-NEURO17	VMH	Lhx9	Lhx9	Neuron	Neuron	21	1724	1174	447	779	2135
VMH-NEURO18	VMH	Nfib_1_Prdm13	Nfib/Prdm13	Neuron	Neuron	91	1764	896	733	828	2192
VMH-NEURO19	VMH	Nfib_2_Car4	Nfib/Car4	Neuron	Neuron	26	2202	1224	420	924	2634
VMH-NEURO2	VMH	Dlk1_1_Il1rapl2	Dlk1/Il1rapl2	Neuron	Neuron	210	2639	550	314	280	2915
VMH-NEURO20	VMH	Nr5a1_1_Npffr2	Nr5a1/Npffr2	Neuron	Neuron	200	1875	852	709	1076	2665
VMH-NEURO21	VMH	Nr5a1_2_Ctxn3	Nr5a1/Ctxn3	Neuron	Neuron	170	2772	1118	575	775	3333
VMH-NEURO22	VMH	Nr5a1_3_Car8	Nr5a1/Car8	Neuron	Neuron	155	2174	1312	705	992	2915
VMH-NEURO23	VMH	Nr5a1_4_7_Glipr1	Nr5a1/Glipr1	Neuron	Neuron	420	2035	2067	813	1238	3551
VMH-NEURO24	VMH	Nr5a1_8_Tcf7l2	Nr5a1/Tcf7l2	Neuron	Neuron	175	2552	993	699	854	3039
VMH-NEURO25	VMH	Nr5a1_9_11_Rorb	Nr5a1/Rorb	Neuron	Neuron	74	2454	970	331	355	2881
VMH-NEURO26	VMH	Nr5a1_Foxp2_1_Prdm13	Nr5a1/Foxp2/Prdm13	Neuron	Neuron	150	2112	802	769	850	2485
VMH-NEURO27	VMH	Nr5a1_Foxp2_2_C1ql2	Nr5a1/Foxp2/C1ql2	Neuron	Neuron	216	2130	853	609	682	2601
VMH-NEURO28	VMH	Nr5a1_Foxp2_3	Nr5a1/Foxp2	Neuron	Neuron	14	967	460	225	287	1133
VMH-NEURO29	VMH	Nr5a1_Smoc2_low	Nr5a1/Smoc2/low	Neuron	Neuron	26	696	288	566	835	1169
VMH-NEURO3	VMH	Dlk1_2_Nts	Dlk1/Nts	Neuron	Neuron	146	1684	889	665	807	2307
VMH-NEURO30	VMH	Nup62cl	Nup62cl	Neuron	Neuron	91	1259	233	152	109	1344
VMH-NEURO31	VMH	Satb2_Calcrl	Satb2/Calcrl	Neuron	Neuron	303	1987	858	629	717	2479
VMH-NEURO32	VMH	Satb2_Six3	Satb2/Six3	Neuron	Neuron	61	1451	666	332	424	1763
VMH-NEURO33	VMH	Slc18a3	Slc18a3	Neuron	Neuron	47	2603	1451	674	1022	2984
VMH-NEURO34	VMH	Slc32a1_1_Nup62cl	Slc32a1/Nup62cl	Neuron	Neuron	11	1354	649	299	586	1625
VMH-NEURO35	VMH	Slc32a1_2	Slc32a1	Neuron	Neuron	149	2112	672	377	262	2438
VMH-NEURO36	VMH	Tbx3_1_Tac2	Tbx3/Tac2	Neuron	Neuron	14	1567	897	272	498	1900
VMH-NEURO37	VMH	Tbx3_2_Anxa2	Tbx3/Anxa2	Neuron	Neuron	63	2409	1290	600	696	2849
VMH-NEURO38	VMH	Tbx3_3_Slc14a1	Tbx3/Slc14a1	Neuron	Neuron	128	3090	1996	914	1235	3758
VMH-NEURO39	VMH	Tsix_Esr1_1_Gabrg3	Tsix/Esr1/Gabrg3	Neuron	Neuron	65	1713	794	432	500	2122
VMH-NEURO4	VMH	Dlk1_3_Maob	Dlk1/Maob	Neuron	Neuron	258	1905	1196	854	1084	2825
VMH-NEURO40	VMH	Tsix_Esr1_2_Twist2	Tsix/Esr1/Twist2	Neuron	Neuron	64	2214	854	416	428	2536
VMH-NEURO5	VMH	Dlk1_4_Maob	Dlk1/Maob	Neuron	Neuron	109	1474	548	457	529	1863
VMH-NEURO6	VMH	Dlk1_5_Egflam	Dlk1/Egflam	Neuron	Neuron	139	1616	386	381	350	1883
VMH-NEURO7	VMH	Dlk1_6_F2rl2	Dlk1/F2rl2	Neuron	Neuron	30	665	193	113	85	750
VMH-NEURO8	VMH	Esr1_1_Insm2	Esr1/Insm2	Neuron	Neuron	106	2221	1124	501	625	2726
VMH-NEURO9	VMH	Esr1_2_Samd9l_Rorb	Esr1/Samd9l/Rorb	Neuron	Neuron	95	1794	808	410	462	2219
VMH-OLIGO1	VMH	Oligo_Opalin_1	Opalin	Glia	Oligodendrocyte	15	1416	890	766	1506	1690
VMH-OLIGO2	VMH	Oligo_Opalin_2	Opalin	Glia	Oligodendrocyte	12	2060	2085	455	1568	2799
VMH-OTHER1	VMH	Scgn	NA	Other	Other	53	1487	433	325	378	1709
VMH-OTHER2	VMH	SMC	NA	Other	Other	7	2049	1602	760	2475	2664
VMH-PVM1	VMH	PVM_Mrc1	Mrc1	Immune	Macrophage	7	1925	1638	758	2443	2585
