# Supplementary material for: Genetic mapping of etiologic brain cell types for obesity
Source: eLife. 2020 Sep 21;9:e55851. doi: 10.7554/eLife.55851 (PMC7505664; doi:10.7554/eLife.55851)
Supplement: Figure 5—source data 2. [file elife-55851-fig5-data2.xlsx]

## Sheet: 13 - S-LDSC HYP
Annotation	P-value	Estimate	Std.error	FWER < 0.05	AD (Jansen, 2019)	ADHD (Demontis, 2017)	AN (Duncan, 2017)	ASD (Grove, 2018)	BIP (PGC, 2018)	CAD (Schunkert, 2011)	CVD (Loh, 2018)	CELIAC (Dubois, 2010)	CROHNS (Jostins, 2012)	DEP (Nagel, 2018)	BP_DIA (Loh, 2018)	EA3 (Lee, 2018)	FG_F (Lagou, 2018)	FI_F (Lagou, 2018)	HBA1C (Wheeler, 2017)	HEIGHT (Loh, 2018)	IBD (Jostins, 2012)	INS (Jansen, 2018)	INT (Savage, 2018)	HDL (Teslovich, 2010)	LDL (Teslovich, 2010)	TG (Teslovich, 2010)	SLE (Bentham, 2015)	MDD (Howard, 2019)	MS (Patsopoulos, 2011)	NEU (Nagel, 2018)	PBC (Cordell, 2015)	RA (Okada, 2014)	RT (Linner, 2019)	SCZ (Pardinas, 2018)	SWB (Okbay, 2016)	BP_SYS (Loh, 2018)	T1D (Bradfield, 2011)	T2D (Loh, 2018)	UC (Jostins, 2012)	WHR (Pulit, 2019)	WHRadjBMI (Loh, 2018)	WORRY (Nagel, 2018)
POA-NEURO66	3.62293e-05	2.63266e-08	6.63463e-09	TRUE	0.0982411	0.0309792	0.694428	0.015604	5.79021e-06	0.147037	0.377542	0.73869	0.812114	0.00668582	0.404801	0.000170922	0.291623	0.574768	0.0520232	0.579124	0.213139	0.00855782	0.0148695	0.341555	0.35442	0.214107	0.334107	0.000507523	0.586827	0.02238	0.067776	0.257544	0.021207	0.00626942	0.740225	0.447955	0.143262	0.270821	0.138046	0.0407359	0.661238	0.00308429
ARCME-NEURO29	4.90718e-05	1.91287e-08	4.91092e-09	TRUE	0.217334	0.43793	0.0981785	0.0725038	9.22293e-09	0.260892	0.122119	0.923126	0.446533	0.0203748	0.417968	2.8244e-05	0.0484191	0.94321	0.492932	0.999676	0.535747	0.000742684	3.1481e-06	0.36305	0.624969	0.7962	0.477054	0.00411205	0.0830333	7.48224e-05	0.199702	0.710814	0.00233819	2.23489e-06	0.312175	0.535442	0.817942	0.36002	0.595561	0.093082	0.925579	2.30161e-07
LHA-NEURO20	4.92527e-05	2.07101e-08	5.31812e-09	TRUE	0.489377	0.0079377	0.0680137	0.260629	3.58406e-07	0.125307	0.170816	0.68225	0.385385	4.09452e-05	0.702222	9.89426e-05	0.219959	0.591946	0.0381398	0.994818	0.38257	0.0458394	0.000232967	0.589181	0.0323006	0.134206	0.00907355	1.36539e-05	0.149504	0.000399454	0.0382479	0.332796	0.0186995	0.0820338	0.297501	0.495868	0.012629	0.341079	0.470387	0.392161	0.998303	0.000369332
POA-NEURO21	0.000100699	1.79505e-08	4.82895e-09	TRUE	0.120363	0.764099	0.186932	0.0270955	0.00124257	0.155451	0.0905951	0.123119	0.369442	0.147638	0.69658	0.0415077	0.994075	0.273815	0.323555	0.989632	0.0836453	0.0716579	0.112215	0.839352	0.223543	0.844487	0.0786571	0.0416817	0.426969	0.109975	0.337629	0.918761	0.0266874	0.0348353	0.106003	0.621083	0.0016407	0.935985	0.118162	0.0536085	0.935054	0.256156
POA-NEURO1	0.000208621	2.72167e-08	7.71246e-09	FALSE	0.156236	0.000137819	0.588418	0.126548	0.0446715	0.465529	0.131505	0.676863	0.765884	0.002848	0.644408	0.01616	0.0341707	0.316848	0.387062	0.99785	0.442129	0.00146057	0.000889518	0.0754795	0.232793	0.0818429	0.00292476	0.000866973	0.00908451	0.00964987	0.00980818	0.287771	0.0301024	0.109224	0.135721	0.568156	0.160177	0.347485	0.529999	0.0556848	0.633805	0.000113716
POA-NEURO40	0.00023516	2.44947e-08	7.00426e-09	FALSE	0.843321	0.00236484	0.133733	0.0357512	0.000399525	0.259901	0.471014	0.761446	0.783145	4.0952e-06	0.683793	3.13801e-07	0.378287	0.745003	0.0403829	0.763029	0.620764	5.14529e-05	6.5742e-08	0.72151	0.676153	0.471034	0.225889	0.000134307	0.130292	6.25326e-05	0.261862	0.60768	0.0182702	0.00584201	0.0424656	0.386924	0.420235	0.74537	0.607121	0.559524	0.999911	0.00108774
POA-NEURO30	0.000291448	2.12169e-08	6.16868e-09	FALSE	0.957036	0.0087895	0.218099	0.0412472	3.73977e-08	0.231495	0.546519	0.677138	0.652979	0.00150953	0.781879	0.000191403	0.34103	0.907889	0.0478265	0.999847	0.428181	0.0697441	1.19559e-05	0.801443	0.634695	0.590297	0.565248	0.00595743	0.0362527	0.00246981	0.0316857	0.0785593	0.0268489	0.00459534	0.136092	0.819817	0.00535156	0.457741	0.231356	0.241887	0.99841	0.000204922
LHA-NEURO18	0.000409199	2.38791e-08	7.13554e-09	FALSE	0.111107	0.0106597	0.0192612	0.0182998	0.000761809	0.416334	0.0574178	0.52437	0.588871	0.00178355	0.382302	0.00058079	0.208275	0.117615	0.396791	0.993608	0.410612	0.000189575	0.00100116	0.687119	0.151081	0.548574	0.302436	0.000269377	0.26778	0.00341317	0.97497	0.163059	0.047815	0.0351101	0.0530862	0.381936	0.18635	0.40118	0.25694	0.0513915	0.638335	0.00689128
HYPR-NEURO14	0.000474156	2.6999e-08	8.16807e-09	FALSE	0.812184	0.000227194	0.132667	0.308016	6.84381e-05	0.125399	0.65107	0.113829	0.603757	0.00012209	0.368287	0.00028959	0.0489763	0.810767	0.241299	0.890228	0.352576	0.374426	8.59455e-08	0.670001	0.360374	0.22872	0.359832	0.00763713	0.079143	0.000502348	0.290818	0.218131	0.041053	6.32097e-07	0.727718	0.290709	0.177164	0.332452	0.455713	0.253095	0.885833	0.00486058
ARCME-NEURO31	0.000551198	1.82621e-08	5.59671e-09	FALSE	0.323016	0.232285	0.174758	0.262053	0.00188633	0.339331	0.129124	0.919384	0.925102	0.0240106	0.21219	0.000177165	0.0970442	0.155352	0.998938	0.999398	0.780776	0.00386262	0.00044593	0.106455	0.714702	0.404655	0.768636	0.0758147	0.449111	0.000453009	0.203388	0.770205	0.118613	0.0190829	0.304249	0.251504	0.681326	0.342221	0.285989	0.116994	0.814926	0.000112144
ARCME-NEURO30	0.000629829	1.75878e-08	5.45357e-09	FALSE	0.653453	0.147763	0.559895	0.400127	1.17e-05	0.661174	0.687652	0.950558	0.0536624	0.000230443	0.855772	1.51912e-05	0.246375	0.870727	0.474487	0.950856	0.206643	0.013765	1.49663e-05	0.855866	0.695698	0.922085	0.934125	0.000715287	0.329109	0.000221707	0.283455	0.967095	0.000990653	0.000332153	0.0634348	0.901375	0.955379	0.723682	0.360497	0.460404	0.999411	9.26142e-06
ARCME-OTHER2	0.000636186	1.69782e-08	5.26923e-09	FALSE	0.293344	0.180004	0.0103345	0.0346851	1.41216e-06	0.0915212	0.10666	0.602729	0.489642	0.00180397	0.450055	7.41695e-05	0.274593	0.816722	0.131284	0.999982	0.22623	0.000416425	1.973e-06	0.780646	0.235891	0.80947	0.81739	0.0116925	0.0657973	0.000618062	0.219436	0.821935	0.135195	6.53256e-05	0.679783	0.294673	0.253794	0.214807	0.193486	0.229284	0.990725	0.000110155
HYPC-NEURO26	0.000727261	2.90406e-08	9.12192e-09	FALSE	0.20236	0.490183	0.29532	0.265967	0.0154121	0.77819	0.580693	0.953751	0.535864	0.0178171	0.553401	0.0254003	0.918874	0.624337	0.3372	0.997866	0.619932	0.125284	0.14871	0.937556	0.554728	0.671832	0.586177	0.0390131	0.613008	0.00677219	0.269803	0.956913	0.0380528	0.133423	0.0890184	0.676919	0.0466419	0.2699	0.572058	0.196113	0.801427	0.0647506
LHA-NEURO27	0.000729424	1.67541e-08	5.26405e-09	FALSE	0.848379	0.288071	0.664736	0.0236831	2.32507e-06	0.168237	0.0131908	0.574229	0.321613	0.0532529	0.283483	0.0142505	0.299945	0.449108	0.010801	0.403984	0.314998	0.00290948	0.0138741	0.607232	0.257536	0.359481	0.377145	0.0301807	0.0760657	0.0118977	0.0605896	0.093933	0.000233352	0.000567418	0.245937	0.151692	0.115881	0.336703	0.56975	0.0701791	0.377808	0.00168517
HYPR-NEURO44	0.000863726	3.56477e-08	1.13764e-08	FALSE	0.563506	0.0280628	0.211348	0.128782	0.0272846	0.655191	0.435471	0.3636	0.126945	0.000575577	0.278188	0.000669905	0.290054	0.34968	0.347449	0.986141	0.0930235	0.0252553	0.000961631	0.943064	0.991301	0.335546	0.410019	0.00790732	0.721216	0.000338096	0.162844	0.358251	0.017095	0.163293	0.306838	0.388273	0.530323	0.062187	0.19368	0.0140581	0.158104	0.00827349
POA-NEURO62	0.00103374	1.23783e-08	4.01845e-09	FALSE	0.275649	0.069134	0.332517	0.643994	3.61044e-05	0.0492967	0.464117	0.351177	0.903479	0.00229154	0.651705	1.9812e-06	0.125204	0.947956	0.272749	0.917103	0.746391	0.0544031	2.79521e-06	0.535208	0.341439	0.770854	0.305629	0.0339761	0.169442	0.000228046	0.092721	0.100618	0.0280622	9.44156e-05	0.119878	0.41938	0.0290111	0.295167	0.512245	0.452347	0.977597	4.15942e-05
LHA-NEURO17	0.00121817	2.20523e-08	7.27526e-09	FALSE	0.6802	0.191903	0.0378993	0.366407	0.000859731	0.204657	0.193828	0.478745	0.269583	0.0192994	0.939375	1.78948e-05	0.029723	0.877983	0.261985	0.851684	0.261452	0.0495852	9.3884e-06	0.501775	0.534626	0.290009	0.379586	0.00267478	0.136142	0.000260475	0.290964	0.246906	0.0371504	0.00015394	0.0176443	0.681673	0.306436	0.174694	0.591513	0.118486	0.62294	6.43525e-05
POA-NEURO20	0.00134055	1.68815e-08	5.62321e-09	FALSE	0.783693	0.133212	0.516564	0.015287	0.0270529	0.20459	0.0743542	0.809618	0.632216	0.0150066	0.337382	0.00666777	0.201547	0.503157	0.72069	0.934185	0.503001	0.00200954	0.00491664	0.913767	0.59245	0.0651512	0.101848	0.0032963	0.0497017	0.00462147	0.298056	0.975973	0.129645	0.0524822	0.240445	0.269789	0.162887	0.0599483	0.737362	0.0989974	0.306138	0.00642915
ARCME-NEURO9	0.00162189	2.29537e-08	7.79774e-09	FALSE	0.810933	0.199227	0.132484	0.349763	0.102805	0.422953	0.0458709	0.49286	0.131067	0.0217408	0.358429	0.000128461	0.681436	0.581894	0.650126	0.952704	0.267501	0.161868	0.00112141	0.597613	0.997634	0.814554	0.631204	0.0687453	0.567207	0.076821	0.754116	0.975993	0.0194312	0.00517956	0.429672	0.105685	0.236482	0.18107	0.926711	0.0472789	0.454852	0.00442782
ARCME-NEURO26	0.0016978	1.69165e-08	5.77462e-09	FALSE	0.237367	0.00579861	0.173111	0.305275	0.000822814	0.926237	0.749584	0.490587	0.718213	0.24238	0.97966	2.12083e-06	0.550685	0.440019	0.263601	0.990652	0.563937	0.0440107	9.53102e-06	0.455352	0.484572	0.716633	0.342648	0.0512511	0.318846	0.0343539	0.345619	0.383234	0.0105933	1.77479e-05	0.246586	0.930802	0.437995	0.230813	0.300129	0.650649	0.993732	0.00339909
ARCME-NEURO32	0.00173886	2.17421e-08	7.44077e-09	FALSE	0.595467	0.252945	0.0779006	0.000747373	0.000924296	0.535053	0.3318	0.749211	0.658302	0.00163581	0.427817	8.07182e-05	0.0213942	0.683151	0.836897	0.997049	0.0884628	0.0554459	1.23059e-05	0.537749	0.583827	0.167708	0.283478	0.00613398	0.114599	0.00363345	0.121083	0.327583	0.277989	0.000242775	0.00969623	0.513041	0.892648	0.231623	0.0696491	0.306637	0.991665	0.013537
LHA-NEURO7	0.00184893	1.66654e-08	5.74107e-09	FALSE	0.208418	0.0151709	0.271249	0.00469862	1.12221e-06	0.156736	0.0126067	0.457848	0.682943	0.00857516	0.396467	0.0575449	0.0505602	0.7054	0.0272769	0.910641	0.662453	0.0805613	0.000156325	0.302264	0.0203669	0.0191458	0.203397	0.0303427	0.00998267	0.0102432	0.00386412	0.0257643	0.000301879	0.000981152	0.184533	0.102409	0.0492741	0.150278	0.378847	0.311268	0.991847	0.0107814
HYPR-NEURO40	0.00204947	2.40874e-08	8.39152e-09	FALSE	0.874777	0.025793	0.528449	0.0809663	0.209311	0.215067	0.104894	0.148529	0.953046	0.0124263	0.117358	0.0678627	0.0910672	0.903054	0.438686	0.430907	0.733868	0.0411434	0.0328721	0.676423	0.88422	0.0965758	0.198676	0.0515599	0.687216	0.00888233	0.494085	0.208749	0.198029	0.0485338	0.0668034	0.0604026	0.241414	0.548751	0.512604	0.0721801	0.639617	0.060551
POA-NEURO19	0.00212572	1.57688e-08	5.51572e-09	FALSE	0.42685	0.0206951	0.363457	0.198295	0.000149784	0.241978	0.848361	0.786719	0.459136	0.0160476	0.584054	0.0160522	0.236331	0.586348	0.277504	0.996211	0.414627	0.00448217	0.00258616	0.45066	0.163846	0.175528	0.546453	0.0121763	0.0933203	0.0036968	0.00244134	0.0919366	0.0643549	0.0163161	0.214047	0.716677	0.0220404	0.530542	0.324594	0.218966	0.521426	6.57933e-06
HYPR-NEURO43	0.00221597	2.17964e-08	7.65953e-09	FALSE	0.921274	0.00677597	0.0277043	0.164793	0.00779379	0.149288	0.0065151	0.846846	0.609651	0.000173915	0.10434	0.00030686	0.302992	0.381513	0.0265453	0.977337	0.192792	0.00972228	4.02587e-05	0.35696	0.932986	0.0426551	0.169168	0.00347315	0.626171	0.000266705	0.344243	0.137384	0.000734437	0.000210533	0.578509	0.0692152	0.17448	0.0141435	0.21155	0.0463611	0.273001	6.25064e-05
POA-NEURO26	0.00222621	1.52436e-08	5.35957e-09	FALSE	0.305777	0.0161798	0.708107	0.039195	4.43248e-06	0.113459	0.192073	0.600708	0.47215	0.00212562	0.585709	4.43251e-06	0.257733	0.556429	0.12253	0.903782	0.391272	0.000734752	3.39643e-07	0.104217	0.113583	0.142777	0.603631	0.000426367	0.161141	0.000428065	0.0854274	0.462222	2.30748e-05	1.27253e-05	0.238813	0.372678	0.0869208	0.319068	0.243203	0.37715	0.995855	2.49416e-06
HYPR-NEURO24	0.0023638	3.17581e-08	1.12417e-08	FALSE	0.854381	0.0727278	0.12179	0.29387	0.00833713	0.800523	0.171492	0.85346	0.135621	0.000310349	0.134925	0.00630213	0.00934112	0.652206	0.328863	0.4218	0.0489262	0.0908263	0.00191994	0.398373	0.458979	0.22816	0.531686	0.00105083	0.0356939	0.0855696	0.207707	0.787165	0.763736	0.0270292	0.684205	0.287855	0.10802	0.152026	0.0404153	0.0961419	0.730502	0.0828461
ARCME-NEURO11	0.00243808	1.50593e-08	5.34945e-09	FALSE	0.150008	0.261406	0.367242	0.220862	0.0402169	0.0235449	0.133396	0.457607	0.0669111	0.638384	0.67055	0.0523904	0.337953	0.519619	0.850411	0.647457	0.0436509	0.0571859	0.144661	0.911703	0.31467	0.108037	0.342743	0.177521	0.399563	0.178397	0.968743	0.730067	0.229489	0.0435932	0.702727	0.505034	0.213508	0.219058	0.175829	0.0669472	0.397609	0.0315347
ARCME-NEURO8	0.00266605	1.62108e-08	5.81813e-09	FALSE	0.9146	0.069117	0.450276	0.484834	0.00166301	0.69865	0.0208746	0.455023	0.168728	0.000681283	0.324768	5.61094e-07	0.0816861	0.589543	0.703091	0.471174	0.440338	0.504965	2.27642e-05	0.85032	0.531223	0.954962	0.511927	0.0356349	0.783537	0.00920897	0.888407	0.585014	0.0627158	0.00355677	0.29619	0.127862	0.0634217	0.248534	0.842171	0.0790744	0.484383	0.00096254
POA-NEURO34	0.00279026	1.49563e-08	5.39654e-09	FALSE	0.126824	0.370038	0.286004	0.0222097	0.00109642	0.0222731	0.470761	0.884443	0.869812	0.00478917	0.810628	0.0152113	0.143547	0.181895	0.0702684	0.916345	0.757533	0.105533	0.00032274	0.478601	0.0361517	0.0399489	0.130618	0.0645439	0.0207224	0.0138759	0.0157714	0.603061	0.594153	0.0327179	0.252567	0.73776	0.0573057	0.319628	0.359974	0.60471	0.814927	0.0102296
LHA-NEURO30	0.00291028	1.65765e-08	6.01092e-09	FALSE	0.358658	0.397153	0.782272	0.271269	0.0328856	0.0233978	0.392575	0.743314	0.960064	0.205183	0.891228	0.0899308	0.735543	0.544558	0.665271	0.0370212	0.804666	0.0496725	0.385781	0.509178	0.666936	0.589748	0.77962	0.0171119	0.322058	0.0212705	0.471077	0.870834	0.203879	0.0208951	0.784999	0.831975	0.139611	0.851379	0.814264	0.18215	0.378729	0.128841
POA-NEURO52	0.0030579	1.70601e-08	6.22291e-09	FALSE	0.127948	0.0114361	0.174802	0.413344	2.20501e-05	0.72568	0.465042	0.436295	0.757866	0.00474534	0.951608	1.59442e-05	0.826046	0.877894	0.783539	0.972735	0.738832	0.0043627	0.0175778	0.515651	0.604164	0.767695	0.145357	0.00187537	0.420372	0.00348624	0.0322672	0.491026	0.07268	0.0962978	0.523406	0.92681	0.221828	0.890762	0.672425	0.33801	0.963973	0.00426716
POA-NEURO44	0.00310422	1.58532e-08	5.79311e-09	FALSE	0.22508	0.333886	0.399785	0.467216	0.0461734	0.216793	0.269154	0.682027	0.83949	0.0500272	0.859918	0.00785118	0.691596	0.800218	0.433019	0.953899	0.807321	0.103528	0.105795	0.27586	0.199175	0.0160947	0.503603	0.00358124	0.603969	0.13359	0.366422	0.355585	0.11699	0.093372	0.18474	0.885169	0.390245	0.981144	0.956628	0.637082	0.989691	0.128327
POA-NEURO10	0.0037696	1.44927e-08	5.42385e-09	FALSE	0.931593	0.272529	0.0476749	0.197826	0.00414579	0.800678	0.0921354	0.810331	0.509497	0.0323857	0.269316	0.00527351	0.331052	0.304344	0.466739	0.965423	0.54865	0.00089169	0.00751078	0.640936	0.60771	0.271789	0.351836	0.00193048	0.0214623	0.00163551	0.0404639	0.179902	0.00286821	0.118448	0.46235	0.224635	0.0297675	0.966661	0.82925	0.355902	0.942063	0.000220851
ARCME-NEURO23	0.00387781	1.45608e-08	5.4688e-09	FALSE	0.21946	0.139458	0.443286	0.0943272	0.00363188	0.0125206	0.169988	0.863789	0.727635	0.000223475	0.298425	5.87504e-06	0.620746	0.902998	0.709275	0.71306	0.454656	0.0283463	0.000319636	0.407672	0.414168	0.211734	0.393301	0.000474593	0.304378	0.000333575	0.280095	0.751794	0.00298564	8.11382e-05	0.202498	0.394821	0.463738	0.531967	0.263752	0.0689552	0.822025	0.000268048
HYPR-NEURO1	0.0039331	2.76642e-08	1.04088e-08	FALSE	0.694718	0.0413705	0.161447	0.117449	0.00912144	0.1596	0.0578378	0.698835	0.24309	0.00307618	0.172349	0.00166434	0.018827	0.966654	0.588427	0.64606	0.296486	0.0605652	0.00252515	0.296777	0.971056	0.149656	0.270112	0.00209342	0.110754	0.000940472	0.524076	0.0361963	0.00950041	0.000547227	0.702427	0.182673	0.440408	0.02426	0.50992	0.0126407	0.274104	0.00104771
POA-NEURO9	0.00393696	1.52733e-08	5.74738e-09	FALSE	0.72671	0.0819827	0.171369	0.0615413	0.0311614	0.281035	0.480001	0.903066	0.206763	0.20638	0.436506	0.104728	0.605352	0.343061	0.96746	0.62781	0.361687	0.566855	0.219345	0.976355	0.84362	0.536277	0.0337712	0.0577728	0.286562	0.0939683	0.558201	0.592344	0.109985	0.137839	0.673983	0.544559	0.691867	0.611723	0.342036	0.216413	0.344259	0.0262984
HYPR-NEURO51	0.00425002	2.91228e-08	1.10668e-08	FALSE	0.776569	0.0243834	0.219903	0.112134	0.0203971	0.238215	0.432626	0.616245	0.166515	0.00320943	0.276633	1.88178e-05	0.165217	0.526917	0.00305516	0.971505	0.117246	0.286597	0.000342752	0.383221	0.578782	0.192574	0.587803	0.0124545	0.306096	0.00409147	0.266909	0.670432	0.0371605	0.0369873	0.403476	0.232279	0.15422	0.162914	0.295562	0.220885	0.818003	0.00070394
LHA-NEURO19	0.00473784	2.16471e-08	8.34379e-09	FALSE	0.826511	0.0266211	0.00805169	0.015756	8.18729e-05	0.33734	0.192552	0.529421	0.843986	0.00858721	0.284884	0.000273642	0.536251	0.373709	0.442258	0.787783	0.643495	0.00245943	2.07478e-07	0.343222	0.434236	0.402364	0.130812	0.000490174	0.059236	0.000235258	0.309199	0.580371	0.00596134	0.00714743	0.0358138	0.147159	0.16284	0.320985	0.450475	0.0602425	0.807765	3.6026e-05
POA-NEURO23	0.0047459	2.41973e-08	9.32885e-09	FALSE	0.84196	8.73146e-05	0.523186	0.00285698	0.0010414	0.0861393	0.354968	0.86791	0.628914	0.00190875	0.529263	1.6061e-05	0.83392	0.81648	0.554853	0.995174	0.285162	0.00231524	8.39025e-08	0.593302	0.502998	0.53741	0.0422622	2.34893e-05	0.116927	6.91489e-08	0.569863	0.214133	0.00112801	4.23503e-05	0.305867	0.507207	0.122424	0.551456	0.188793	0.392404	0.911293	3.91763e-11
HYPC-NEURO28	0.00481513	1.75969e-08	6.79725e-09	FALSE	0.598856	0.19662	0.246497	0.484995	0.000137855	0.678582	0.248174	0.347658	0.256139	0.0118151	0.689912	0.000672069	0.124579	0.411613	0.0350323	0.999721	0.0799797	0.000609679	2.12267e-05	0.935857	0.729548	0.41139	0.227007	0.0196901	0.573819	0.000331022	0.322596	0.884386	0.00220558	6.51354e-05	0.0126686	0.363809	0.432372	0.112711	0.127791	0.74756	0.987764	0.000104322
LHA-NEURO6	0.00483391	2.00902e-08	7.76435e-09	FALSE	0.280689	0.00988583	0.00932068	0.162628	0.0532634	0.823336	0.462014	0.866245	0.992189	0.0742963	0.694584	0.0218456	0.265214	0.0635966	0.54218	0.748625	0.847141	0.0862308	0.000297023	0.906188	0.895949	0.232592	0.219742	0.0364902	0.87293	0.000706407	0.710742	0.276563	0.111769	0.000220198	0.0026466	0.848503	0.537383	0.18103	0.648808	0.550047	0.847099	0.0794436
POA-NEURO4	0.0049579	1.47958e-08	5.7376e-09	FALSE	0.862547	0.0384805	0.390076	0.284751	0.0019094	0.233293	0.209398	0.889107	0.440721	0.0566851	0.296468	0.00222771	0.878279	0.764414	0.792211	0.943436	0.937424	9.89843e-05	0.000741586	0.242683	0.454982	0.327635	0.50273	0.000818542	0.597999	0.00872914	0.717344	0.490489	0.0386763	0.00144077	0.0999002	0.425122	0.276474	0.477275	0.858842	0.059378	0.454664	0.000882886
ARCME-NEURO24	0.00517622	1.41718e-08	5.52757e-09	FALSE	0.127188	0.107201	0.232676	0.00687473	0.000231609	0.050061	0.059464	0.748534	0.529432	0.00123426	0.202021	7.89338e-07	0.383617	0.872221	0.658166	0.99932	0.158521	4.0179e-05	8.28703e-06	0.628922	0.87977	0.544024	0.831563	0.000369004	0.515598	8.94349e-06	0.612531	0.64111	0.000394882	0.000229569	0.0636942	0.226499	0.596058	0.190183	0.198525	0.192316	0.827569	3.74243e-06
LHA-NEURO13	0.00574612	1.42599e-08	5.64221e-09	FALSE	0.870709	0.160308	0.0733513	0.185176	0.00594471	0.19563	0.024207	0.347187	0.0533419	0.0036507	0.151299	3.31611e-06	0.162475	0.71134	0.93971	0.770496	0.0893651	0.0176216	1.02118e-05	0.901626	0.621721	0.811094	0.636834	0.00149479	0.36581	0.000492247	0.875665	0.475385	0.0425	8.81788e-06	0.111797	0.162827	0.415945	0.18565	0.607849	0.15131	0.464739	0.000250031
LHA-NEURO24	0.00576809	1.2514e-08	4.95402e-09	FALSE	0.137762	0.0109729	0.338572	0.0119768	0.000763994	0.0897548	0.251229	0.734579	0.616009	0.00126036	0.939328	0.00189821	0.523147	0.158905	0.439476	0.972342	0.515199	0.0209643	0.000451937	0.364641	0.147535	0.0670503	0.651788	0.00153559	0.310085	7.87146e-05	0.24309	0.255109	0.0782242	9.27016e-05	0.0109162	0.867711	0.883728	0.192208	0.374155	0.292322	0.996691	0.00192632
VMH-NEURO24	0.00648945	1.36395e-08	5.49017e-09	FALSE	0.544535	0.17529	0.513591	0.548832	0.0639074	0.204777	0.143063	0.0796269	0.461572	0.20259	0.733678	0.334148	0.115663	0.597767	0.389064	0.631777	0.312837	0.0354346	0.0407498	0.351656	0.99982	0.401101	0.838301	0.283308	0.0917471	0.148081	0.110592	0.256502	0.136217	0.00767166	0.414452	0.780087	0.495472	0.00475744	0.474087	0.0558611	0.126724	0.0193125
HYPR-NEURO48	0.00659473	2.64326e-08	1.06643e-08	FALSE	0.769462	0.796581	0.502954	0.919746	0.0305663	0.00444796	0.15298	0.0178041	0.062254	0.345863	0.119415	0.540244	0.270621	0.394027	0.107571	0.286817	0.123175	0.00803966	0.703881	0.396503	0.175217	0.0317457	0.204532	0.174322	0.0014026	0.319925	0.632769	0.10002	0.110564	0.637195	0.70131	0.090161	0.00834535	0.0108559	0.532957	0.0403046	0.044228	0.0527098
POA-NEURO43	0.00723993	1.29419e-08	5.29291e-09	FALSE	0.0983754	0.278222	0.0643269	0.155555	0.064008	0.077852	0.0204029	0.705903	0.0238537	0.0449365	0.390703	0.00307478	0.0604506	0.212304	0.0663615	0.169585	0.0256343	0.273568	0.00159466	0.01441	0.026608	0.0490629	0.0878243	0.0529103	0.122984	0.0497457	0.424159	0.0658731	0.0893795	0.0547992	0.00230001	0.230578	0.104284	0.0400642	0.0572616	0.00351131	0.0631968	0.051841
POA-NEURO6	0.00735555	1.40404e-08	5.75563e-09	FALSE	0.827302	0.010583	0.42242	0.336518	0.0566599	0.548782	0.435769	0.0491799	0.378092	0.0791602	0.632776	0.255409	0.227877	0.425965	0.70795	0.749246	0.508902	0.28252	0.159838	0.0921759	0.480407	0.0775803	0.142853	0.0341601	0.0307793	0.00610937	0.00865764	0.584178	0.323137	0.208679	0.282627	0.692853	0.0589818	0.329004	0.391711	0.187813	0.310323	0.00526573
POA-NEURO33	0.00752594	1.58632e-08	6.52505e-09	FALSE	0.403792	0.00559878	0.446298	0.585914	0.0115719	0.336877	0.352457	0.941037	0.727222	0.0197204	0.775687	0.00377936	0.0260525	0.536217	0.747078	0.10311	0.326138	0.429728	0.0353733	0.283059	0.077565	0.0501349	0.138995	0.180218	0.220014	0.19093	0.0295155	0.965888	0.972451	0.292342	0.597284	0.504545	0.0983305	0.0872674	0.222301	0.157479	0.854972	0.124861
HYPC-NEURO15	0.00757881	2.10326e-08	8.66043e-09	FALSE	0.106507	0.0781962	0.28004	0.0403585	0.0225229	0.385003	0.549302	0.415145	0.508541	0.0393469	0.758185	0.0116834	0.127737	0.173454	0.432847	0.455473	0.191183	0.560706	0.00133072	0.176367	0.383087	0.156078	0.335028	0.00438312	0.735556	0.0119611	0.2995	0.649256	0.0131891	0.00165393	0.0864906	0.51123	0.0237351	0.219953	0.129807	0.0795783	0.670418	0.0391913
HYPR-NEURO30	0.00820752	2.50997e-08	1.04601e-08	FALSE	0.888641	0.696818	0.307138	0.904392	0.000725296	0.334499	0.194476	0.0925205	0.179355	0.237419	0.142717	0.0589079	0.0674668	0.559506	0.929701	0.105284	0.53171	0.729838	0.166825	0.262531	0.338515	0.614729	0.202671	0.180039	0.755481	0.259837	0.767475	0.128624	0.192074	0.0458124	0.134597	0.139617	0.0619052	0.344785	0.941183	0.0265238	0.118032	0.492338
HYPR-NEURO16	0.00953336	3.86453e-08	1.64853e-08	FALSE	0.859065	0.283467	0.00596635	0.0627724	0.0176963	0.634265	0.284399	0.568379	0.690732	0.253987	0.518347	0.0213764	0.0218655	0.256154	0.700029	0.564531	0.397027	0.0579619	0.00966319	0.217493	0.440252	0.211694	0.296199	0.110165	0.0212452	0.705714	0.161801	0.0516747	0.679187	0.198383	0.955959	0.319324	0.200591	0.209636	0.439688	0.179635	0.768697	0.457991
LHA-NEURO29	0.0099711	2.91491e-08	1.25241e-08	FALSE	0.753881	0.0551146	0.0582503	0.338703	0.000633191	0.180514	0.501246	0.746457	0.43039	0.000880607	0.724612	0.194444	0.0642321	0.0838867	0.918576	0.894923	0.644845	0.00319375	0.303198	0.318138	0.245508	0.0413837	0.0603066	0.00253165	0.224474	0.00240037	0.264388	0.779316	0.133531	0.0670338	0.0455714	0.77941	0.172221	0.238061	0.568518	0.545529	0.935315	0.00122658
VMH-NEURO19	0.0102276	1.88069e-08	8.11379e-09	FALSE	0.153755	0.358793	0.138109	0.848231	0.243272	0.420038	0.168451	0.697798	0.843637	0.00724438	0.395281	0.335945	0.365846	0.379102	0.791318	0.09114	0.498326	0.0903402	0.533659	0.310285	0.88757	0.950109	0.845421	0.221198	0.650362	0.228224	0.785855	0.530119	0.173941	0.142725	0.313218	0.557204	0.670668	0.170754	0.548136	0.924708	0.983113	0.264767
POA-NEURO25	0.0104326	1.32703e-08	5.74367e-09	FALSE	0.173341	0.133707	0.0401754	0.429406	0.0167485	0.21991	0.0480455	0.362485	0.333751	0.0260192	0.287066	0.0168631	0.301013	0.524627	0.673481	0.843319	0.224197	0.0403466	0.0210273	0.260583	0.271294	0.247505	0.120136	0.000782334	0.242496	0.0069653	0.0626515	0.0377743	0.000517061	0.365896	0.141183	0.102735	0.0710857	0.782735	0.271607	0.326078	0.6962	8.62106e-05
HYPC-NEURO30	0.0108227	1.96171e-08	8.54203e-09	FALSE	0.86331	0.0477287	0.164801	0.0954669	0.0282747	0.196245	0.262911	0.761716	0.195129	0.0189237	0.456392	0.00121144	0.532279	0.977883	0.0826114	0.997151	0.203215	0.00118579	0.000296625	0.194169	0.659353	0.220356	0.726469	0.09487	0.0353468	0.002283	0.182496	0.562978	0.0303094	0.0215338	0.23533	0.424067	0.0424263	0.282991	0.425476	0.0256674	0.808725	0.00237822
LHA-NEURO4	0.0109236	1.74766e-08	7.62168e-09	FALSE	0.113325	0.128272	0.0329074	0.153793	6.16942e-06	0.32185	0.0487293	0.559042	0.233845	0.237687	0.00644925	9.56966e-05	0.409825	0.783916	0.0595922	0.789207	0.231661	0.0146764	0.000194437	0.3722	0.0646084	0.155564	0.103697	0.0518259	0.0116116	0.128287	0.122955	0.227007	0.268206	0.038502	0.259133	0.0264657	0.0496028	0.140784	0.282829	0.0457692	0.336718	0.106438
HYPR-NEURO53	0.0109852	1.92298e-08	8.39405e-09	FALSE	0.922417	0.0850299	0.266237	0.490736	0.0166389	0.531248	0.59486	0.980109	0.443021	0.00453427	0.716832	0.0186788	0.746458	0.114119	0.552911	0.999718	0.328698	0.147661	0.596482	0.988587	0.783394	0.577495	0.237539	0.00173521	0.670132	0.000796812	0.856567	0.880226	0.00841826	0.0235206	0.131014	0.453381	0.930003	0.0762868	0.138165	0.139204	0.560951	0.00741759
HYPC-NEURO14	0.0110381	1.5922e-08	6.95571e-09	FALSE	0.241987	0.032521	0.131498	0.0448063	0.0286913	0.411568	0.173451	0.336235	0.22847	0.00321117	0.770722	0.00135093	0.528194	0.693551	0.00857369	0.9731	0.0772497	0.0756976	2.08927e-05	0.813967	0.457611	0.64576	0.704152	0.0100855	0.140477	0.0001761	0.156563	0.599516	0.0569629	0.00139913	0.208679	0.781151	0.135788	0.820442	0.251311	0.719563	0.879499	0.0135426
POA-NEURO31	0.0112091	1.13782e-08	4.98345e-09	FALSE	0.397919	0.123638	0.878165	0.443124	0.0058144	0.139277	0.85521	0.0420388	0.453542	0.494881	0.794282	0.0554422	0.840524	0.482233	0.970924	0.968161	0.60415	0.0745669	0.768228	0.611591	0.516542	0.645939	0.0491376	0.259722	0.493595	0.375991	0.0993501	0.279566	0.00278609	0.0296854	0.811771	0.699637	0.328502	0.137679	0.815787	0.195377	0.287452	0.134513
POA-NEURO22	0.0118414	1.26634e-08	5.59771e-09	FALSE	0.737649	0.29267	0.16294	0.100563	0.000668434	0.776928	0.10665	0.803641	0.848316	0.00367907	0.268759	3.75741e-07	0.0747157	0.284614	0.20591	0.803523	0.332007	0.00751633	1.55809e-05	0.32173	0.339979	0.253188	0.195782	0.000152222	0.0382052	0.000120951	0.0175326	0.722938	0.195209	0.00151182	0.166009	0.632678	0.329321	0.0817842	0.0568588	0.0568706	0.260518	7.09292e-05
ARCME-NEURO10	0.0137316	9.56684e-09	4.33896e-09	FALSE	0.883444	0.00179915	0.133234	0.370136	0.0352495	0.21029	0.359909	0.931594	0.912951	0.381044	0.59275	0.00289406	0.020048	0.212498	0.231554	0.453516	0.873253	0.202812	0.148359	0.38515	0.460079	0.260565	0.806384	0.101781	0.590488	0.425845	0.433607	0.812705	0.0443448	0.137148	0.235894	0.658032	0.877883	0.0555561	0.903724	0.700706	0.943206	0.090641
VMH-NEURO16	0.0138549	1.49256e-08	6.78015e-09	FALSE	0.535908	0.378938	0.0502366	0.938313	0.075458	0.0429605	0.0502921	0.955013	0.981397	0.106315	0.132309	0.022525	0.275264	0.641181	0.0136968	0.224648	0.660708	0.217863	0.0614843	0.282046	0.395652	0.214155	0.228217	0.772048	0.110688	0.166489	0.605436	0.859509	0.0287496	0.0792956	0.676528	0.107172	0.167909	0.257311	0.627879	0.0111824	0.0810037	0.522763
POA-NEURO2	0.013959	1.29024e-08	5.8689e-09	FALSE	0.683505	0.209164	0.0860368	0.0478475	0.0126408	0.261384	0.600332	0.381465	0.529131	0.0564196	0.570772	0.041291	0.0994231	0.539903	0.860282	0.970591	0.545442	0.000173705	0.00803546	0.400133	0.24694	0.236831	0.106535	0.000456995	0.171194	7.70116e-05	0.0578237	0.321695	0.0722088	0.0120594	0.423949	0.586711	0.107486	0.117347	0.258508	0.22869	0.470107	1.34851e-05
POA-NEURO35	0.0140806	1.15865e-08	5.27852e-09	FALSE	0.37649	0.0239883	0.183683	0.0600266	0.00252574	0.00980314	0.453432	0.441361	0.980201	0.0173884	0.598978	0.0220501	0.116245	0.464931	0.649279	0.481747	0.707	0.0399581	0.00118647	0.412899	0.429262	0.243212	0.54733	0.0188142	0.213438	0.0601908	0.218364	0.0965076	0.0525228	0.0687176	0.129296	0.236841	0.295624	0.199361	0.661216	0.742476	0.944687	0.00977732
POA-NEURO5	0.0141204	1.3432e-08	6.12238e-09	FALSE	0.222261	0.00532718	0.625957	0.476459	0.0119565	0.31532	0.589971	0.607092	0.664785	0.000424536	0.830834	0.0245361	0.0619167	0.250761	0.308764	0.416418	0.541855	0.240112	0.0131097	0.944709	0.436537	0.113269	0.0872447	0.243153	0.230777	0.00672602	0.176097	0.694669	0.489568	0.0114683	0.543676	0.671685	0.127953	0.0699567	0.308067	0.0657352	0.178057	0.0206217
POA-NEURO59	0.0147173	1.47957e-08	6.79444e-09	FALSE	0.448043	0.0884111	0.0461069	0.398255	0.434387	0.189438	0.214358	0.825271	0.824639	0.0200569	0.640763	0.00386102	0.37539	0.393822	0.174945	0.110977	0.27287	0.101839	0.0202707	0.54001	0.929389	0.593953	0.317335	0.00593818	0.735039	0.420493	0.464826	0.39673	0.405788	0.079155	0.296425	0.754363	0.301421	0.0913096	0.054365	0.0893927	0.198669	0.46983
ARCME-NEURO21	0.0147615	1.66955e-08	7.67105e-09	FALSE	0.599885	0.0621879	0.0299901	0.385131	0.000986702	0.0513667	0.454753	0.836649	0.855579	0.0105829	0.64304	0.0202767	0.542081	0.550255	0.506111	0.803769	0.207644	0.133772	0.00070671	0.8894	0.680619	0.248521	0.90496	0.0075082	0.492127	0.0176955	0.773007	0.899896	0.0318839	0.00282408	0.0377872	0.550713	0.603812	0.308215	0.0789082	0.473617	0.930339	0.0721334
ARCME-OTHER1	0.0149279	1.5308e-08	7.04788e-09	FALSE	0.564964	0.386708	0.924797	0.255836	0.00758974	0.648958	0.847164	0.70607	0.935909	0.00548653	0.96934	0.00145956	0.284761	0.501452	0.46388	0.999943	0.861066	0.000364076	0.00145929	0.655299	0.311487	0.80314	0.963401	0.0465698	0.125576	0.000301745	0.692779	0.851162	0.00906751	0.0136595	0.195415	0.98648	0.49352	0.745584	0.795528	0.256374	0.985345	8.90045e-06
POA-NEURO48	0.0150164	1.38354e-08	6.37675e-09	FALSE	0.136613	0.622879	0.64292	0.218241	0.0126637	0.00666748	0.260006	0.170853	0.0159854	0.998981	0.865812	0.118078	0.404673	0.568302	0.918143	0.736517	0.0997401	0.186016	0.617935	0.440583	0.350159	0.730317	0.0240308	0.672491	0.608776	0.669414	0.21163	0.375697	0.274265	0.357381	0.307126	0.757506	0.00364088	0.268408	0.442093	0.256433	0.498242	0.245968
HYPC-NEURO33	0.0157478	2.39845e-08	1.11517e-08	FALSE	0.692524	0.0518473	0.143279	0.451883	0.223827	0.0558575	0.911652	0.765177	0.0132464	0.00508457	0.783587	0.0830056	0.214814	0.321093	0.747754	0.422208	0.36781	0.00561421	0.165492	0.155951	0.320246	0.0255872	0.532404	0.00987472	0.739741	0.00643038	0.848024	0.629719	0.30239	0.414494	0.0851793	0.645261	0.571252	0.201258	0.759489	0.0949208	0.0794957	0.00686037
HYPR-NEURO7	0.0160743	2.12397e-08	9.91322e-09	FALSE	0.64464	0.266364	0.430829	0.846757	0.0360408	0.339393	0.950861	0.0188461	0.147456	0.125672	0.578422	0.23891	0.874681	0.166861	0.888829	0.626925	0.277379	0.230317	0.420952	0.737769	0.863981	0.910741	0.939715	0.279419	0.307631	0.165432	0.190983	0.130714	0.132105	0.194935	0.816231	0.812929	0.367512	0.640385	0.42634	0.0382719	0.294289	0.0230104
HYPC-NEURO31	0.0162487	1.93238e-08	9.03725e-09	FALSE	0.714145	0.186214	0.838089	0.313162	0.0633283	0.097516	0.515021	0.733158	0.219613	0.000500681	0.759081	0.000139612	0.0865851	0.99283	0.0856412	0.998874	0.252388	0.0129591	5.84163e-05	0.978196	0.990113	0.919984	0.997438	0.00105508	0.206622	4.3054e-05	0.197467	0.950756	0.00790014	0.0315344	0.00931144	0.715344	0.47993	0.0988304	0.349117	0.150238	0.572163	3.26432e-06
ARCME-NEURO17	0.0195328	1.49009e-08	7.22119e-09	FALSE	0.83091	0.300234	0.0766081	0.0610626	0.00314867	0.300033	0.340781	0.960157	0.0412686	0.545738	0.773354	7.25009e-06	0.472066	0.321518	0.728961	0.949609	0.00738217	0.0595327	0.0178817	0.953757	0.326848	0.773815	0.538896	0.0318693	0.42839	0.20349	0.79685	0.987357	0.317542	0.0208291	0.00324834	0.30776	0.494883	0.032701	0.345997	0.421197	0.706259	0.131458
POA-NEURO57	0.0199401	1.63408e-08	7.95177e-09	FALSE	0.641103	0.0168464	0.287398	0.553502	0.175314	0.516035	0.402962	0.0590131	0.912382	0.156113	0.346763	0.00306994	0.771995	0.520786	0.792423	0.870592	0.808386	0.109657	0.366275	0.516245	0.941575	0.41909	0.050586	0.0767962	0.0502859	0.0204764	0.212291	0.722157	0.240793	0.061823	0.492178	0.695972	0.0186481	0.353549	0.791112	0.487191	0.937385	0.00226315
VMH-NEURO28	0.0209011	5.02405e-08	2.46824e-08	FALSE	0.118566	0.462826	0.344753	0.512476	0.0818846	0.805251	0.0788443	0.213231	0.0306819	0.309239	0.419837	0.110993	0.118963	0.0880652	0.164178	0.114577	0.0311906	0.192608	0.132047	0.143575	0.289473	0.0569312	0.268927	0.226385	0.459546	0.809097	0.617877	0.0357422	0.190928	0.163019	0.0877348	0.203137	0.356798	0.752603	0.0794555	0.0951903	0.592277	0.708212
HYPR-NEURO47	0.0212211	1.85062e-08	9.12014e-09	FALSE	0.095218	0.0566305	0.476211	0.0229159	0.00371613	0.507614	0.0414852	0.565819	0.0100604	0.000506526	0.191431	0.0681466	0.0759107	0.979442	0.143349	0.652851	0.0445154	0.0946271	0.0115404	0.202981	0.33728	0.105745	0.0191658	0.0261422	0.38585	0.00185855	0.028716	0.00498095	0.0672124	0.329856	0.770186	0.278434	0.0281755	0.0706589	0.0430926	0.104913	0.245584	0.221431
HYPC-NEURO19	0.0213114	4.10751e-08	2.02601e-08	FALSE	0.656951	0.184872	0.207102	0.750139	0.34697	0.220663	0.108918	0.481351	0.0937311	0.0643772	0.368081	0.00989133	0.126916	0.225115	0.338082	0.255365	0.199843	0.0609607	0.175272	0.453595	0.593874	0.121321	0.689846	0.00397748	0.105882	0.116218	0.985228	0.978761	0.0688752	0.676278	0.0634561	0.229507	0.0510528	0.222165	0.352618	0.0132374	0.391898	0.0179327
POA-NEURO46	0.0214264	1.20018e-08	5.92639e-09	FALSE	0.974745	0.278694	0.17027	0.252735	0.0268757	0.0968826	0.0067352	0.165158	0.145513	0.0157576	0.0760448	0.000141855	0.136796	0.0663724	0.260498	0.56184	0.444065	0.00297985	0.000300435	0.149971	0.276173	0.343527	0.20662	0.0233501	0.0112427	0.129165	0.519709	0.764147	0.0648347	0.0350334	0.510553	0.0107361	0.0905833	0.224114	0.741627	0.264628	0.747324	0.105798
LHA-NEURO15	0.0215247	1.63511e-08	8.0817e-09	FALSE	0.0298807	0.145758	0.684596	0.276234	0.0236829	0.283028	0.373255	0.55328	0.618995	0.148686	0.0855543	0.0600891	0.927275	0.780911	0.395965	0.960217	0.788051	0.0499773	0.148219	0.843836	0.529804	0.278152	0.183878	0.181572	0.0891287	0.138852	0.0390542	0.478568	0.0765599	0.269824	0.0812223	0.135846	0.231612	0.7447	0.827564	0.220768	0.700326	0.369447
HYPC-NEURO27	0.022416	1.87003e-08	9.32114e-09	FALSE	0.924967	0.708359	0.130715	0.180055	0.0615366	0.95574	0.879791	0.748927	0.105239	0.000671423	0.896932	0.0474958	0.729978	0.797047	0.26451	0.993003	0.263847	0.00480132	0.0801574	0.969274	0.297279	0.433508	0.410769	0.0674809	0.409265	2.20827e-05	0.771997	0.262337	0.135026	0.548179	0.241423	0.807761	0.350151	0.052633	0.0476334	0.211197	0.298085	0.00606861
POA-NEURO29	0.0229587	1.0528e-08	5.27413e-09	FALSE	0.112793	0.204442	0.101463	0.251311	0.0017952	0.0760235	0.0808082	0.0452157	0.733377	0.054134	0.551939	0.338664	0.383582	0.562193	0.44056	0.60818	0.271854	0.0129476	0.226907	0.425382	0.0902889	0.121772	0.714032	0.102228	0.014299	0.0611385	0.0080566	0.468836	0.0943478	0.145859	0.543827	0.174716	0.0410119	0.121597	0.0995869	0.327277	0.828599	0.0134755
VMH-NEURO27	0.023572	2.19861e-08	1.10761e-08	FALSE	0.346305	0.270123	0.905769	0.596051	0.0127813	0.896454	0.628058	0.717447	0.74713	0.42118	0.870314	0.146745	0.252442	0.285078	0.578969	0.419751	0.765739	0.103064	0.0601766	0.33884	0.719488	0.830371	0.12381	0.439353	0.606833	0.74846	0.487889	0.428656	0.0216104	0.0699454	0.0917432	0.856366	0.752518	0.170795	0.550607	0.226739	0.84272	0.294603
HYPC-NEURO29	0.0240637	1.31228e-08	6.64028e-09	FALSE	0.844276	0.0511336	0.581259	0.162671	0.019394	0.379935	0.810718	0.756742	0.905452	0.189881	0.820812	0.153688	0.177024	0.931398	0.373394	0.993586	0.522238	0.143811	0.0137027	0.416776	0.788883	0.923006	0.326827	0.144616	0.751316	0.00717512	0.283238	0.55993	0.205753	0.0362037	0.101063	0.614714	0.103723	0.193993	0.153602	0.803379	0.99195	0.000243662
POA-NEURO16	0.0252216	1.5748e-08	8.05037e-09	FALSE	0.181268	0.0973377	0.755274	0.307857	0.256666	0.326863	0.351956	0.667986	0.966923	0.222	0.832876	0.0901636	0.0137485	0.849246	0.691719	0.604472	0.800203	0.462073	0.319775	0.29696	0.463908	0.0274438	0.327101	0.0812084	0.183886	0.116176	0.229799	0.626997	0.394693	0.705144	0.174279	0.472699	0.855977	0.783787	0.772514	0.389123	0.923926	0.0389894
HYPC-NEURO23	0.0266532	3.09173e-08	1.59992e-08	FALSE	0.928536	0.0268774	0.56001	0.356354	0.652034	0.896036	0.18161	0.515788	0.0909658	0.186426	0.322434	0.0983563	0.192899	0.0798504	0.253525	0.300519	0.103884	0.0821715	0.14111	0.931263	0.805114	0.728565	0.519777	0.0743482	0.473789	0.145839	0.532639	0.744217	0.532837	0.62188	0.579142	0.382337	0.0300137	0.102009	0.0720331	0.682134	0.98518	0.265163
LHA-NEURO8	0.0272698	1.21948e-08	6.3431e-09	FALSE	0.0784422	0.594565	0.0921836	0.0534769	0.0075779	0.115941	0.780585	0.430629	0.866642	0.00142184	0.940449	0.0001701	0.446125	0.656336	0.219959	0.795755	0.838573	0.376871	0.00263154	0.190974	0.263064	0.0393616	0.0304184	0.00738832	0.492106	0.00333408	0.751198	0.947276	0.00286148	0.0253206	0.0615608	0.946402	0.692748	0.750935	0.697171	0.427961	0.970915	0.00479242
HYPR-NEURO29	0.0273455	1.83164e-08	9.53325e-09	FALSE	0.783319	0.608816	0.357647	0.530077	0.335268	0.144471	0.345249	0.24985	0.0659025	0.12183	0.72307	0.163233	0.370017	0.508407	0.853112	0.970712	0.0102433	0.383009	0.166368	0.22179	0.367646	0.124801	0.370126	0.0826789	0.255513	0.141257	0.340361	0.167628	0.421656	0.156351	0.262989	0.697285	0.0276591	0.13086	0.0380524	0.0155474	0.135897	0.349037
HYPC-NEURO22	0.0274946	1.98466e-08	1.03424e-08	FALSE	0.87085	0.38497	0.518749	0.411793	0.0647964	0.696914	0.739984	0.559532	0.115771	0.0545456	0.874681	0.0514145	0.346865	0.931358	0.840509	0.920105	0.104965	0.237015	0.234018	0.745165	0.44441	0.942017	0.964	0.12856	0.395631	0.0381479	0.576201	0.611583	0.244196	0.405117	0.245333	0.666029	0.0343592	0.414065	0.444521	0.131942	0.551237	0.0224414
HYPR-NEURO13	0.0276573	1.90097e-08	9.91948e-09	FALSE	0.302832	0.0749069	0.306729	0.152666	0.000163532	0.130403	0.547041	0.885134	0.0580628	0.0262455	0.680846	0.00108029	0.0411835	0.0381415	0.124639	0.257514	0.0291293	0.592998	0.000964683	0.188365	0.217761	0.0288593	0.263828	0.101113	0.054666	0.245377	0.923026	0.548417	0.208014	0.0259087	0.968128	0.403882	0.387594	0.494379	0.0390617	0.00704123	0.186775	0.406157
POA-NEURO64	0.0296813	9.17407e-09	4.8656e-09	FALSE	0.289556	0.0443004	0.241382	0.0274445	8.34669e-06	0.0714245	0.0149039	0.875116	0.933771	0.0346797	0.412317	8.77562e-07	0.112501	0.897028	0.258579	0.720548	0.910409	0.0727804	2.47979e-05	0.0718244	0.107913	0.195144	0.570139	0.120985	0.0900439	0.0200056	0.57251	0.518041	0.259651	0.000246044	0.436303	0.163896	0.197644	0.799549	0.485926	0.667356	0.996347	0.00624157
HYPR-NEURO9	0.0301516	2.06364e-08	1.09852e-08	FALSE	0.754644	0.0638547	0.0703136	0.134888	0.000302519	0.0248383	0.0852548	0.127544	0.482639	0.025558	0.468073	0.00637786	0.038818	0.189628	0.0755412	0.5913	0.273772	0.716936	0.000792906	0.866738	0.539987	0.0624806	0.383799	0.00301243	0.661318	0.00152264	0.188734	0.181048	0.0775845	0.0501847	0.178056	0.231027	0.0951659	0.0031662	0.253597	0.108367	0.832684	0.000263189
ARCME-NEURO22	0.0304943	1.93031e-08	1.03028e-08	FALSE	0.23685	0.059522	0.0267297	0.384834	0.000846869	0.00107698	0.22884	0.397988	0.942544	0.00143877	0.594213	0.0091263	0.289801	0.449692	0.240689	0.417193	0.707116	0.0401988	0.000351005	0.185367	0.131251	0.0426709	0.911222	0.0106727	0.242381	0.0254567	0.597813	0.51302	0.0951797	0.00557778	0.783745	0.309846	0.564206	0.0268203	0.166137	0.473181	0.883458	0.200677
VMH-NEURO6	0.0308293	1.53685e-08	8.22398e-09	FALSE	0.46107	0.491737	0.130962	0.808938	0.161701	0.204034	0.843541	0.737355	0.225788	0.70001	0.387198	0.0363639	0.065182	0.299969	0.116148	0.511866	0.157142	0.0704661	0.235029	0.195126	0.576235	0.191422	0.757794	0.125994	0.615567	0.074148	0.783501	0.817013	0.130483	0.0368903	0.553955	0.480869	0.501863	0.316811	0.496999	0.501787	0.421033	0.00539841
VMH-NEURO23	0.0311379	1.01266e-08	5.43179e-09	FALSE	0.590906	0.461403	0.853162	0.409961	0.0053409	0.0837354	0.293309	0.285024	0.588038	0.169213	0.918796	0.0697795	0.462697	0.842591	0.0639181	0.924361	0.378043	0.0683763	0.0293355	0.16687	0.981937	0.284523	0.406074	0.0607614	0.024683	0.0300919	0.0287408	0.38493	0.415681	0.0217154	0.826708	0.933501	0.550082	0.0777821	0.423503	0.0971	0.316762	0.00359942
POA-NEURO42	0.0313428	1.13693e-08	6.1079e-09	FALSE	0.169607	0.0771665	0.122074	0.170188	0.00016421	0.14459	0.192432	0.777686	0.986676	0.00372509	0.376411	9.09741e-06	0.16279	0.278972	0.595639	0.334101	0.583387	0.204784	0.00159416	0.643708	0.419953	0.560792	0.732384	0.0137627	0.471455	0.0795246	0.506974	0.661149	0.58043	0.012484	0.6374	0.388172	0.0645682	0.501294	0.189194	0.0772265	0.497045	0.107085
ARCME-NEURO25	0.0326842	1.19387e-08	6.47881e-09	FALSE	0.950592	0.742431	0.623161	0.0534844	0.00533701	0.493064	0.817515	0.1606	0.581173	0.0333891	0.969678	0.139361	0.166718	0.377988	0.183871	0.893504	0.120101	0.00398115	0.0266815	0.114698	0.920323	0.702191	0.0333524	0.0334364	0.324387	0.0009345	0.3588	0.364488	0.225795	0.0892408	0.0681725	0.980367	0.297713	0.231619	0.395798	0.0409105	0.757488	0.00328814
HYPC-NEURO17	0.0330647	1.69137e-08	9.20451e-09	FALSE	0.863287	0.113888	0.939034	0.255707	0.0361352	0.617118	0.810994	0.423832	0.375403	0.700653	0.949722	0.00994842	0.459139	0.378707	0.99891	0.984167	0.399484	0.0717103	0.301921	0.400983	0.999161	0.852448	0.424345	0.223564	0.716941	0.406371	0.482469	0.444178	0.180878	0.0872084	0.268765	0.748304	0.841552	0.573154	0.517728	0.0982101	0.683074	0.261307
LHA-NEURO1	0.0330925	1.06876e-08	5.81742e-09	FALSE	0.206677	0.00947503	0.406871	0.00410987	6.51168e-06	0.109605	0.712524	0.412394	0.73165	0.0491376	0.810744	0.0107089	0.0181548	0.753419	0.050412	0.981352	0.464378	0.13452	4.86381e-05	0.171351	0.149269	0.0354236	0.391597	0.0156944	0.101738	0.00682775	0.0508092	0.335714	0.00645538	0.0033297	0.0819402	0.49082	0.36234	0.121249	0.148725	0.652321	0.979	1.24411e-05
POA-NEURO65	0.0341055	1.64412e-08	9.01574e-09	FALSE	0.247051	0.0301325	0.489932	0.13702	0.00155825	0.0697373	0.53196	0.682968	0.996858	0.0601475	0.90584	0.0451793	0.00271314	0.166695	0.667722	0.581702	0.961456	0.14454	0.0218562	0.152992	0.137212	0.0504403	0.441399	0.388036	0.263815	0.173596	0.265888	0.578432	0.920934	0.0665992	0.594687	0.718861	0.156917	0.205902	0.634754	0.531525	0.966743	0.0333926
HYPC-NEURO2	0.0354619	4.23614e-08	2.34564e-08	FALSE	0.906464	0.135867	0.21856	0.761366	0.228106	0.515353	0.12999	0.882744	0.590013	0.267859	0.228592	0.0248296	0.0264624	0.473373	0.762372	0.36549	0.828861	0.167092	0.0324909	0.0966959	0.317273	0.102446	0.718675	0.392709	0.19172	0.031878	0.278972	0.522784	0.852913	0.0178973	0.0755248	0.0402576	0.0672338	0.104681	0.416923	0.0522284	0.212111	0.164503
POA-NEURO55	0.0358813	7.05511e-09	3.91815e-09	FALSE	0.768878	0.0165134	0.0289995	0.186236	0.000386126	0.0838211	0.141805	0.768811	0.437297	0.167356	0.366052	3.23691e-08	0.156853	0.411026	0.390178	0.869251	0.366419	0.241117	1.80163e-07	0.128278	0.690009	0.469333	0.233049	0.019055	0.702447	0.147922	0.104994	0.374501	0.164674	0.000121988	0.0103059	0.168854	0.318858	0.377478	0.620673	0.109963	0.429385	0.0208908
ARCME-NEURO6	0.0363655	1.16847e-08	6.51132e-09	FALSE	0.672229	0.440611	0.053394	0.777625	0.0665767	0.594188	0.710105	0.141928	0.122101	0.521185	0.544382	0.167401	0.0844557	0.53626	0.219666	0.798613	0.38035	0.0109656	0.114817	0.916615	0.994428	0.446835	0.177928	0.180448	0.152788	0.0191154	0.258248	0.717205	0.0273203	0.434549	0.4188	0.857048	0.780114	0.858529	0.69472	0.170337	0.699669	0.0134719
ARCME-NEURO19	0.0369257	2.28929e-08	1.2807e-08	FALSE	0.475981	0.510856	0.0545141	0.441277	0.000901606	0.227275	0.820321	0.977184	0.505399	0.172288	0.381583	0.0370096	0.0269844	0.0588794	0.712914	0.87288	0.351207	0.302424	0.00182024	0.0532583	0.104138	0.0797563	0.637287	0.0274206	0.462949	0.0395969	0.631357	0.85157	0.352639	0.108278	0.206086	0.629653	0.264374	0.12761	0.411256	0.202518	0.871859	0.00113846
HYPC-NEURO16	0.0373073	1.82884e-08	1.02581e-08	FALSE	0.820102	0.397118	0.475249	0.246408	0.0377551	0.818804	0.630145	0.132822	0.555813	0.804634	0.869613	0.409575	0.0377408	0.556442	0.171892	0.166439	0.256625	0.133917	0.229126	0.0441815	0.285368	0.108365	0.20996	0.457597	0.218057	0.37573	0.134624	0.0910885	0.185744	0.35703	0.380604	0.94702	0.0366335	0.0877128	0.205504	0.303587	0.51639	0.253525
POA-NEURO32	0.0395875	9.76192e-09	5.56078e-09	FALSE	0.188088	0.00304726	0.250178	0.0868353	0.000121324	0.251832	0.355199	0.572911	0.653081	0.00234604	0.862417	1.98567e-05	0.922189	0.862403	0.639499	0.948604	0.505853	0.0020468	0.000172307	0.479007	0.734338	0.532037	0.521292	0.245934	0.661195	0.0096679	0.225262	0.728505	0.0393199	0.00108224	0.570977	0.399217	0.286555	0.785964	0.623571	0.654056	0.998504	0.000622999
POA-NEURO49	0.0403848	1.15252e-08	6.6e-09	FALSE	0.0847315	0.112764	0.472529	0.372017	0.0201564	0.00107904	0.436932	0.546372	0.568476	0.0638771	0.887221	0.408658	0.170885	0.508535	0.353875	0.402835	0.581739	0.125784	0.105846	0.589668	0.282767	0.0458823	0.076075	0.224604	0.160842	0.0178437	0.0193747	0.389216	0.434939	0.297005	0.761559	0.863762	0.088881	0.103455	0.504332	0.305717	0.966455	0.00886886
LHA-NEURO3	0.0406839	1.46886e-08	8.42813e-09	FALSE	0.210461	0.0680471	0.190827	0.286531	0.0122555	0.277776	0.0952616	0.517693	0.32261	0.220621	0.265934	0.0128742	0.0383065	0.50926	0.0979984	0.496407	0.11911	0.18271	0.00616309	0.556471	0.597224	0.263847	0.335348	0.294238	0.788724	0.122299	0.115217	0.134373	0.12686	0.0403191	0.109509	0.252678	0.72774	0.67193	0.276031	0.579635	0.962751	0.166
LHA-NEURO22	0.0409663	2.13816e-08	1.22912e-08	FALSE	0.841194	0.320874	0.123798	0.263783	0.0321593	0.176187	0.838649	0.23603	0.297893	0.229096	0.793579	0.256383	0.0935412	0.521262	0.377469	0.936136	0.085673	0.226617	0.348104	0.145658	0.897874	0.0858353	0.408991	0.0459546	0.115667	0.178623	0.738413	0.716434	0.738883	0.933958	0.338495	0.8951	0.955931	0.926229	0.0487836	0.341072	0.71691	0.515121
POA-NEURO17	0.0417742	9.40283e-09	5.43372e-09	FALSE	0.224777	0.00625379	0.748905	0.0750515	0.00665306	0.459796	0.407195	0.292045	0.894133	0.422524	0.863326	0.0580872	0.648357	0.643988	0.909611	0.748452	0.79533	0.107204	0.429113	0.959765	0.334667	0.174187	0.294512	0.0227589	0.203724	0.1237	0.234582	0.384601	0.150219	0.885724	0.223824	0.736679	0.332817	0.925423	0.535731	0.824094	0.946672	0.0630949
LHA-NEURO25	0.0418283	1.24298e-08	7.18548e-09	FALSE	0.983519	0.35397	0.00936746	0.0214274	0.0219781	0.446759	0.430458	0.00702092	0.11662	0.162931	0.838913	0.0387239	0.175018	0.0739355	0.719771	0.168848	0.196387	0.198298	0.0192283	0.484631	0.2751	0.0303563	0.00817667	0.0549631	0.203854	0.0133597	0.265169	0.297977	0.33715	0.0239534	0.211244	0.623545	0.471034	0.241814	0.362839	0.165575	0.323547	0.00899024
LHA-NEURO2	0.0420436	1.07311e-08	6.21211e-09	FALSE	0.911253	0.0809131	0.668983	0.408419	0.00122242	0.205667	0.69932	0.616966	0.44	0.458027	0.712531	0.0137322	0.0206534	0.77478	0.443609	0.526788	0.308428	0.196308	0.112342	0.896263	0.916642	0.105014	0.625769	0.246062	0.476767	0.199651	0.93324	0.889163	0.457628	0.4179	0.0731035	0.188909	0.0954437	0.078453	0.747314	0.432172	0.8356	0.0158572
HYPC-NEURO24	0.0425944	1.3267e-08	7.70738e-09	FALSE	0.745752	0.161547	0.0187969	0.826651	0.19341	0.512258	0.478294	0.551582	0.194525	0.0947486	0.85546	0.0832091	0.293362	0.184264	0.121974	0.949696	0.270562	0.0401891	0.0350435	0.944351	0.652829	0.590304	0.360323	0.217377	0.600041	0.0770068	0.626838	0.469022	0.46696	0.133044	0.321495	0.949854	0.624456	0.588432	0.656763	0.0811849	0.752792	0.130894
ARCME-NEURO20	0.0432279	7.33845e-09	4.28049e-09	FALSE	0.802757	0.146503	0.132048	0.108701	0.000651893	0.0412817	0.125859	0.769416	0.290315	0.0113817	0.0333671	0.000314089	0.240177	0.784894	0.290987	0.39105	0.0542848	0.0844966	5.20568e-05	0.315737	0.939325	0.418282	0.691152	0.00789223	0.0858899	0.00492356	0.240223	0.728536	0.0386803	0.00158271	0.0192835	0.0337715	0.05155	0.111356	0.246894	0.234992	0.762974	0.0147808
HYPR-NEURO37	0.0435644	2.13126e-08	1.24581e-08	FALSE	0.820105	0.325968	0.163745	0.555169	0.0208311	0.430543	0.102596	0.946563	0.064482	0.301757	0.0515427	0.113826	0.56679	0.0972358	0.990948	0.105641	0.120846	0.531807	0.125652	0.874695	0.756307	0.114757	0.862518	0.177819	0.592903	0.680513	0.589815	0.19749	0.355215	0.217877	0.266392	0.0909797	0.417763	0.0991765	0.254441	0.137249	0.245112	0.338004
HYPR-NEURO31	0.0436604	2.95918e-08	1.73081e-08	FALSE	0.562478	0.287059	0.422249	0.0985045	0.321802	0.139905	0.46511	0.847607	0.0653278	0.563472	0.74129	0.00995635	0.511644	0.874156	0.826221	0.779734	0.169559	0.228586	0.0121737	0.235043	0.255916	0.614794	0.713199	0.931324	0.804615	0.658578	0.743202	0.362671	0.570408	0.875474	0.633162	0.630583	0.0286346	0.708924	0.231133	0.357253	0.980062	0.770845
HYPR-NEURO21	0.0443518	1.76213e-08	1.03516e-08	FALSE	0.550157	0.303505	0.00403828	0.226468	0.00323168	0.256893	0.417823	0.0853486	0.22448	0.0210231	0.433496	0.00318574	0.290255	0.6427	0.196163	0.0630608	0.0298129	0.789193	0.0157948	0.454582	0.784963	0.174635	0.314249	0.0190967	0.167604	0.0177577	0.364717	0.607152	0.460656	0.0422903	0.387493	0.377867	0.0796229	0.258495	0.117612	0.0669584	0.656136	0.0156476
ARCME-NEURO16	0.0449632	8.9941e-09	5.30379e-09	FALSE	0.60252	0.561816	0.967588	0.349862	0.000457095	0.19173	0.56402	0.0435302	0.0773114	0.762086	0.842141	0.0037656	0.79492	0.574255	0.993732	0.773623	0.201087	0.0207241	0.124639	0.717119	0.439921	0.74509	0.922135	0.413939	0.3887	0.439611	0.486099	0.533987	0.441311	0.00592553	0.558607	0.467025	0.0507558	0.545169	0.563186	0.176717	0.391387	0.230568
ARCME-NEURO2	0.0449983	9.77435e-09	5.76516e-09	FALSE	0.58968	0.394897	0.0477592	0.273999	0.127186	0.213621	0.258317	0.706517	0.320155	0.42174	0.787468	0.0456778	0.446095	0.914094	0.0651852	0.837358	0.0840779	0.13128	0.000214415	0.385434	0.754588	0.879698	0.137608	0.439489	0.0128253	0.192185	0.267255	0.443208	0.264002	0.0404712	0.279316	0.625704	0.895645	0.198693	0.145879	0.24324	0.611055	0.0315592
HYPR-NEURO50	0.0450207	1.28419e-08	7.57551e-09	FALSE	0.733596	0.00907449	0.38526	0.398856	0.0465699	0.0352586	0.575978	0.39162	0.152089	0.0314612	0.524741	0.0685355	0.699273	0.849806	0.406065	0.551206	0.156582	0.295762	0.0403346	0.698783	0.999858	0.441965	0.227101	0.0179008	0.484805	0.011937	0.841567	0.689815	0.275863	0.00805455	0.930722	0.661203	0.207461	0.216278	0.120626	0.0562845	0.641229	0.00196367
ARCME-NEURO5	0.0455481	1.22683e-08	7.26089e-09	FALSE	0.141047	0.568864	0.096335	0.362427	0.0393152	0.0211727	0.664814	0.990074	0.318734	0.00118758	0.719147	0.0237527	0.59055	0.841635	0.19968	0.997512	0.164519	0.125615	0.00134872	0.450869	0.641968	0.683211	0.829172	0.030281	0.187779	0.011705	0.0252957	0.679851	0.0312218	0.0101556	0.2104	0.869756	0.272665	0.0857139	0.0741999	0.507696	0.635051	0.000128746
POA-NEURO53	0.0460912	1.43767e-08	8.53723e-09	FALSE	0.735341	0.112294	0.835678	0.146205	0.0126545	0.37839	0.495325	0.700443	0.79189	0.507534	0.778238	0.163867	0.0268994	0.135544	0.392105	0.199035	0.744961	0.658323	0.289406	0.0665197	0.317889	0.0243378	0.510714	0.150275	0.285249	0.145093	0.634887	0.670366	0.694709	0.74271	0.520706	0.487154	0.792439	0.331834	0.8097	0.770704	0.945384	0.145602
VMH-NEURO22	0.0471109	9.63495e-09	5.75724e-09	FALSE	0.46696	0.0968766	0.476911	0.125802	0.0611506	0.527031	0.273712	0.551351	0.404653	0.431992	0.435426	0.286204	0.155082	0.752607	0.632558	0.160347	0.344379	0.0811684	0.0519302	0.109403	0.917039	0.833259	0.456283	0.287968	0.040297	0.0265578	0.140924	0.538709	0.353819	0.0641173	0.0717857	0.890507	0.966832	0.531724	0.122121	0.325442	0.473067	0.0188553
POA-NEURO11	0.0471801	1.07689e-08	6.43754e-09	FALSE	0.157634	0.196837	0.674726	0.825086	0.249959	0.0910697	0.0513515	0.300118	0.492123	0.561306	0.242932	0.18296	0.241089	0.200048	0.556563	0.88747	0.498978	0.0739487	0.156471	0.43565	0.326691	0.120426	0.948425	0.291686	0.503212	0.302721	0.618045	0.906499	0.144401	0.735372	0.0873481	0.152451	0.046845	0.4028	0.34165	0.346682	0.755932	0.106349
HYPR-NEURO20	0.0493223	1.24555e-08	7.54213e-09	FALSE	0.919707	0.101472	0.0821552	0.117156	2.59388e-05	0.140149	0.190967	0.78498	0.57608	0.0632789	0.302893	0.00215354	0.0292826	0.15028	0.0821455	0.482183	0.137438	0.0515959	0.00102463	0.736973	0.251744	0.15899	0.0317874	0.0306935	0.00400585	0.104946	0.420911	0.647104	0.147212	0.000705646	0.634483	0.195921	0.0595473	0.535084	0.423182	0.249451	0.912493	0.059379
VMH-NEURO14	0.0499075	2.06355e-08	1.25386e-08	FALSE	0.119457	0.0644284	0.110217	0.984159	0.215161	0.0598819	0.0190375	0.817621	0.941293	0.0364896	0.250084	0.0354981	0.506233	0.174414	0.585205	0.491344	0.912699	0.0072217	0.0727545	0.137429	0.237203	0.1513	0.969196	0.41197	0.74719	0.0297326	0.889069	0.936972	0.384966	0.239945	0.374997	0.126358	0.10634	0.254976	0.900432	0.154205	0.249153	0.262913
HYPR-NEURO26	0.049914	1.25622e-08	7.63342e-09	FALSE	0.951125	0.0548339	0.490429	0.0216005	0.00601095	0.0847268	0.356327	0.679531	0.345559	0.0293204	0.507613	0.00769113	0.0560039	0.368518	0.190042	0.369627	0.205891	0.307777	5.95626e-06	0.13233	0.377814	0.195543	0.124972	0.0721604	0.318277	0.127746	0.520447	0.0626926	0.264071	0.00354525	0.217111	0.493461	0.110181	0.554425	0.309313	0.430221	0.386401	0.0325315
HYPC-NEURO5	0.0502983	1.37937e-08	8.40069e-09	FALSE	0.886755	0.448866	0.0204881	0.662127	0.0889459	0.0696562	0.609339	0.699974	0.893776	0.0672506	0.658413	0.0718245	0.0946738	0.129976	0.698237	0.242589	0.665438	0.337415	0.00144714	0.449463	0.364109	0.217314	0.762941	0.0647916	0.449568	0.0561028	0.815484	0.384161	0.894856	0.0591473	0.571638	0.411858	0.132021	0.119222	0.744651	0.301078	0.854048	0.160052
POA-NEURO63	0.0537264	7.11486e-09	4.41986e-09	FALSE	0.578321	0.0856384	0.990501	0.298735	0.0227225	0.251571	0.962633	0.037126	0.178947	0.922498	0.942672	0.176197	0.483956	0.290975	0.541953	0.734131	0.196081	0.031634	0.772375	0.252916	0.449421	0.360385	0.0353578	0.610115	0.213019	0.561517	0.0816103	0.158653	0.228021	0.286409	0.965104	0.801833	0.465433	0.54987	0.367969	0.0277395	0.0857742	0.374749
ARCME-NEURO4	0.054198	1.00919e-08	6.28606e-09	FALSE	0.141174	0.588106	0.406412	0.0105171	0.000933921	0.301588	0.0558544	0.976149	0.676155	0.00577433	0.358836	0.0429174	0.648986	0.782906	0.47749	0.952463	0.173139	1.92225e-05	0.000623227	0.0211379	0.235814	0.00922699	0.604002	0.00190163	0.00531648	0.00864881	0.0942718	0.90394	0.0216592	0.00073006	0.123301	0.158216	0.306706	0.88684	0.0747702	0.307639	0.660213	0.00597909
HYPR-NEURO23	0.0562659	1.37575e-08	8.66936e-09	FALSE	0.913094	0.0933744	0.166689	0.00486518	0.000114508	0.520166	0.0999479	0.46623	0.456079	0.0323441	0.0808883	0.000250912	0.0705087	0.305118	0.823449	0.502903	0.197509	0.40042	2.89068e-05	0.609957	0.0764839	0.137255	0.215228	0.000216357	0.125753	0.0152801	0.0575615	0.290657	0.0446413	0.00674313	0.502714	0.235946	0.10245	0.0978998	0.395514	0.106425	0.696516	0.00376978
HYPR-NEURO42	0.059441	1.40009e-08	8.97791e-09	FALSE	0.514933	0.329751	0.841733	0.420568	0.216379	0.0733741	0.424055	0.636379	0.422624	0.383502	0.208339	0.473955	0.25774	0.161199	0.409898	0.0922214	0.371397	0.73321	0.340803	0.539619	0.364643	0.0740685	0.257961	0.342092	0.0145992	0.262911	0.421451	0.57684	0.830454	0.90712	0.0793471	0.251933	0.753204	0.559407	0.378612	0.106845	0.031979	0.357921
LHA-NEURO9	0.0609748	1.9349e-08	1.25103e-08	FALSE	0.540996	0.628153	0.267324	0.59902	0.0355638	0.197407	0.62301	0.135625	0.851688	0.003273	0.540223	0.336755	0.778992	0.512428	0.59336	0.88734	0.481411	0.945833	0.0190778	0.542349	0.938428	0.313534	0.430037	0.0825389	0.913268	0.0143323	0.745132	0.282065	0.199178	0.0567587	0.107271	0.500105	0.482718	0.71058	0.309183	0.521017	0.997558	0.0269506
POA-NEURO56	0.0617824	1.04827e-08	6.80705e-09	FALSE	0.27425	0.284712	0.162107	0.330351	0.0451804	0.905139	0.8803	0.280311	0.537223	0.0279799	0.438531	0.0155534	0.510744	0.982108	0.102511	0.18535	0.426946	0.224845	0.0253321	0.438918	0.983689	0.948794	0.208633	0.0668505	0.0501991	0.0831508	0.0847702	0.514257	0.403691	0.00143085	0.077981	0.598255	0.00976918	0.0479769	0.376617	0.655063	0.647905	0.0547113
POA-NEURO45	0.0619358	1.10575e-08	7.18615e-09	FALSE	0.836426	0.016972	0.113438	0.462875	0.319523	0.140842	0.417954	0.539669	0.727036	0.396004	0.752871	0.0011904	0.196411	0.714677	0.62991	0.2135	0.741705	0.220535	0.185897	0.189182	0.692026	0.722368	0.142934	0.725795	0.198425	0.992714	0.0533954	0.701362	0.111755	0.348249	0.400058	0.237387	0.632305	0.0952668	0.810786	0.161059	0.422856	0.849788
LHA-NEURO10	0.0635348	9.62512e-09	6.30841e-09	FALSE	0.568525	0.0613288	0.0307811	0.206967	3.67211e-07	0.0602098	0.426786	0.227267	0.907324	0.0219968	0.365479	0.00934386	0.274781	0.485184	0.473321	0.77276	0.759317	0.0705115	0.00334181	0.958762	0.78246	0.228509	0.0907833	0.0144875	0.0609139	0.040613	0.597739	0.374562	1.46787e-05	0.000584467	0.0957634	0.248772	0.0431887	0.803098	0.929037	0.739511	0.990972	0.00171557
HYPR-NEURO5	0.0637143	1.68491e-08	1.10535e-08	FALSE	0.729862	0.0530505	0.0353259	0.605986	0.187835	0.144699	0.168289	3.39543e-05	0.0493284	0.151896	0.576563	0.0321533	0.135479	0.0577798	0.350563	0.116829	0.0865121	0.195468	0.0814547	0.725321	0.957245	0.193106	0.357443	0.0329282	0.213897	0.129276	0.455595	0.668771	0.272253	0.892309	0.068175	0.425229	0.0772392	0.630615	0.376964	0.103574	0.644538	0.108787
HYPR-NEURO49	0.0643936	4.17755e-08	2.75038e-08	FALSE	0.318481	0.430273	0.667749	0.428736	0.332601	0.406998	0.668482	0.393979	0.29367	0.0449475	0.235805	0.0198272	0.16153	0.88674	0.669769	0.396485	0.184761	0.386247	0.00114226	0.453634	0.700322	0.810754	0.296672	0.1091	0.695495	0.273208	0.583145	0.85176	0.147429	0.266221	0.209203	0.233867	0.274054	0.572437	0.132125	0.20628	0.555128	0.125901
HYPR-NEURO27	0.0646475	1.1862e-08	7.81997e-09	FALSE	0.859879	0.327195	0.551491	0.378757	0.00482706	0.233391	0.80674	0.638242	0.433609	0.101308	0.667833	0.00835186	0.670437	0.735009	0.206534	0.36607	0.0718113	0.0332266	0.0359599	0.520563	0.394962	0.0347698	0.510835	0.0448787	0.139086	0.0071904	0.393574	0.215199	0.292366	0.0247513	0.895703	0.797977	0.217299	0.350394	0.0325269	0.157104	0.366179	0.0335967
POA-NEURO39	0.0663528	7.69854e-09	5.12035e-09	FALSE	0.742579	0.184165	0.414241	0.759329	0.000967617	0.232178	0.582463	0.0137456	0.808028	0.389365	0.423858	0.339926	0.0740159	0.0861804	0.79131	0.344601	0.27507	0.125577	0.339615	0.373566	0.165858	0.163666	0.122079	0.265198	0.260148	0.317382	0.607251	0.363818	0.376777	0.475026	0.938177	0.493736	0.0346624	0.217332	0.200922	0.319045	0.380731	0.45081
ARCME-NEURO15	0.0667563	8.23697e-09	5.48988e-09	FALSE	0.323652	0.010558	0.0749606	0.366283	0.0313408	0.548235	0.452354	0.443184	0.612555	0.0491448	0.921652	0.0469102	0.103565	0.184681	0.510743	0.973503	0.19635	0.0926897	0.00319914	0.301414	0.746902	0.220134	0.738785	0.12235	0.189514	0.261614	0.0952833	0.575239	0.281778	0.441077	0.0885602	0.948688	0.356169	0.284449	0.0402376	0.79863	0.99359	0.190729
HYPR-NEURO52	0.0670846	1.27763e-08	8.52971e-09	FALSE	0.795389	0.300546	0.755457	0.746775	0.335364	0.887233	0.997968	0.610943	0.242318	0.15879	0.650983	0.159254	0.834532	0.634193	0.197038	0.926131	0.237159	0.143876	0.0583983	0.999645	0.777946	0.845351	0.979518	0.258595	0.680249	0.377236	0.732626	0.246779	0.135747	0.275068	0.275916	0.951644	0.314531	0.462251	0.254986	0.119537	0.450931	0.266647
ARCME-NEURO14	0.0672462	9.40548e-09	6.28448e-09	FALSE	0.935152	0.0638253	0.503557	0.582684	0.0726872	0.406633	0.335329	0.795448	0.956068	0.0181301	0.687554	0.000281874	0.140129	0.160719	0.493927	0.402009	0.651677	0.00277926	0.0285022	0.546955	0.287845	0.437325	0.123882	0.00636909	0.280572	0.0523126	0.12126	0.856761	0.13054	0.56028	0.109761	0.29853	0.640521	0.458223	0.586621	0.609474	0.956026	0.0778316
VMH-NEURO7	0.0685126	2.65172e-08	1.78331e-08	FALSE	0.16686	0.404097	0.568467	0.39341	0.161508	0.235908	0.252287	0.352615	0.948218	0.307033	0.0865331	0.778186	0.896261	0.200404	0.139609	0.704271	0.795876	0.334371	0.102324	0.798157	0.303573	0.582594	0.822461	0.317448	0.220064	0.158609	0.120655	0.979442	0.0688894	0.374603	0.550088	0.192133	0.247514	0.81026	0.967312	0.702514	0.840281	0.0686798
HYPR-NEURO25	0.0700077	1.13916e-08	7.7193e-09	FALSE	0.951198	0.13093	0.0164479	0.146848	0.00752111	0.216227	0.600655	0.879636	0.4091	0.0140081	0.19925	0.00565615	0.0921313	0.502138	0.195166	0.401201	0.208026	0.453499	0.000764014	0.619449	0.615455	0.533967	0.197709	0.00540351	0.252206	0.0856685	0.714493	0.413022	0.597967	0.00124614	0.601738	0.232883	0.529928	0.843838	0.302711	0.386943	0.74497	0.360007
VMH-NEURO35	0.0717285	1.19798e-08	8.18828e-09	FALSE	0.190446	0.0216977	0.00453563	0.294474	0.732697	0.234233	0.372156	0.969992	0.481734	0.00882316	0.425403	5.16915e-05	0.998098	0.861928	0.980494	0.309392	0.373508	0.144977	0.0166968	0.36172	0.0515692	0.210983	0.110126	0.01613	0.489502	0.0375913	0.693294	0.605016	0.018457	0.0777509	0.126024	0.515479	0.40568	0.843415	0.38102	0.409888	0.607774	0.0847237
HYPR-NEURO2	0.0762451	1.18189e-08	8.26038e-09	FALSE	0.658341	0.0240555	0.132311	0.144768	0.0819929	0.17319	0.475988	0.941644	0.231904	2.44055e-06	0.553789	0.00910829	0.048617	0.768212	0.311646	0.990256	0.58774	0.00819221	0.000437256	0.61152	0.263017	0.233094	0.918282	0.000754291	0.126263	1.29803e-05	0.20455	0.329171	0.030609	0.000821163	0.341013	0.840526	0.409164	0.0290068	0.733716	0.415101	0.838856	1.32888e-05
POA-NEURO28	0.0764185	8.44407e-09	5.90667e-09	FALSE	0.65841	0.135509	0.0593986	0.0973627	7.3581e-07	0.45824	0.203736	0.291491	0.107194	0.00145286	0.436825	2.861e-08	0.151611	0.933131	0.549712	0.904174	0.0716067	0.0116511	8.64949e-09	0.324248	0.159323	0.630359	0.0446745	0.0287181	0.0022084	0.000442928	0.512708	0.499542	0.0392727	9.48397e-06	0.0891011	0.126387	0.440281	0.480984	0.17878	0.563031	0.881139	0.00958892
HYPR-NEURO28	0.0781157	1.40967e-08	9.94221e-09	FALSE	0.83787	0.0140032	0.749312	0.244328	0.0657158	0.929387	0.133067	0.622579	0.481901	0.447439	0.170263	0.00864922	0.943527	0.994832	0.395811	0.153464	0.443436	0.472117	0.0416909	0.359265	0.991078	0.289186	0.215066	0.30648	0.244074	0.483925	0.140575	0.718084	0.625718	0.0198634	0.838178	0.160005	0.231812	0.361539	0.120587	0.00747419	0.222462	0.406639
HYPC-NEURO4	0.0789226	2.40075e-08	1.69982e-08	FALSE	0.602159	0.0108711	0.247693	0.175817	0.0226507	0.373586	0.211404	0.77511	0.764361	0.278958	0.345479	0.0130655	0.44297	0.222645	0.0844995	0.422206	0.871446	0.346074	0.0140079	0.793361	0.251196	0.565182	0.836017	0.40735	0.671335	0.228969	0.588654	0.885668	0.100014	0.0343439	0.473113	0.295091	0.254272	0.0832716	0.613279	0.114582	0.217918	0.373671
VMH-NEURO34	0.0795594	1.08372e-08	7.69665e-09	FALSE	0.172751	0.0808682	0.0565565	0.428137	0.0572772	0.157964	0.100012	0.993653	0.784763	0.238311	0.355827	0.00499425	0.0943742	0.0822393	0.533896	0.214086	0.381488	0.269419	0.101114	0.0358004	0.126728	0.0374659	0.100316	0.120273	0.908235	0.0954849	0.691007	0.429335	0.322908	0.0353432	0.652714	0.150856	0.307885	0.21426	0.133727	0.287461	0.211905	0.163084
LHA-NEURO5	0.079702	7.33337e-09	5.21177e-09	FALSE	0.444692	0.157755	0.00591122	0.0898013	7.98546e-06	0.166563	0.0127625	0.0796657	0.847648	0.00318851	0.108053	0.0701757	0.197402	0.545582	0.312092	0.995447	0.433947	0.104512	0.0024235	0.0919311	0.0880166	0.0273427	0.192435	0.00962167	0.0802676	0.00354322	0.712034	0.120314	0.0141189	0.00323294	0.209408	0.0273565	0.00897734	0.319867	0.317761	0.470512	0.963381	0.00182711
VMH-NEURO25	0.0803544	8.9849e-09	6.40547e-09	FALSE	0.0340343	0.722981	0.195328	0.0534739	0.00768884	0.4782	0.916625	0.702871	0.0325138	0.303636	0.840452	0.452541	0.0557214	0.56335	0.185116	0.99813	0.0206267	0.273645	0.0132438	0.62271	0.991701	0.449904	0.54905	0.0951934	0.0260998	0.0752992	0.604564	0.161063	0.135112	0.510893	0.620997	0.904457	0.619952	0.684106	0.0396304	0.572009	0.552846	0.0356402
POA-NEURO61	0.0805159	1.19543e-08	8.52897e-09	FALSE	0.948965	0.136085	0.198772	0.882053	0.0536078	0.764544	0.997825	0.835231	0.950199	0.183484	0.968134	0.103511	0.362204	0.651121	0.623184	0.422004	0.704747	0.0525582	0.290598	0.141266	0.209655	0.401351	0.69931	0.127015	0.22804	0.02982	0.368121	0.250615	0.0952603	0.231763	0.176822	0.984213	0.0583431	0.658721	0.507631	0.67274	0.785265	0.0258659
VMH-OTHER1	0.0843613	1.20695e-08	8.76937e-09	FALSE	0.581651	0.310236	0.974231	0.16267	0.00122085	0.0685873	0.0304494	0.911009	0.530108	0.166953	0.102568	0.0161782	0.914275	0.673637	0.471053	0.975221	0.212277	0.204216	0.0148653	0.646464	0.886509	0.355625	0.184663	0.0755878	0.486566	0.00533739	0.561807	0.781629	0.376124	0.0600589	0.828068	0.0738191	0.682531	0.802284	0.322871	0.0420246	0.162726	0.00291409
ARCME-NEURO12	0.0865873	7.09627e-09	5.2099e-09	FALSE	0.170113	0.0067086	0.490875	0.0930197	0.00171481	0.206652	0.155926	0.632892	0.690225	0.00910661	0.293386	0.00022344	0.0981597	0.833128	0.883568	0.337702	0.683888	0.000218192	0.000618522	0.204027	0.52338	0.278179	0.0217757	0.0449908	0.0266856	0.0545667	0.0303471	0.577823	0.399753	0.0188681	0.142641	0.277532	0.198644	0.550378	0.497749	0.820976	0.897635	0.0148193
POA-NEURO3	0.0890165	7.34131e-09	5.45078e-09	FALSE	0.962031	0.1689	0.137023	0.134518	0.0210018	0.433841	0.211716	0.789315	0.661086	0.00557113	0.763888	0.00994986	0.461728	0.890091	0.546738	0.905905	0.735324	0.00472145	0.210193	0.272919	0.854697	0.0711702	0.0912219	0.000549898	0.0808797	0.0074985	0.356138	0.180229	0.00292288	0.401108	0.158381	0.582673	0.529359	0.0580119	0.90288	0.648388	0.691005	0.000657762
HYPC-NEURO8	0.0899065	9.78745e-09	7.29682e-09	FALSE	0.869122	0.825716	0.490564	0.651908	0.230039	0.0725315	0.33791	0.390199	0.068398	0.735552	0.509603	0.0989073	0.128159	0.955021	0.827184	0.434583	0.116243	0.0820572	0.568104	0.806431	0.942201	0.766821	0.321978	0.483	0.699965	0.365515	0.993941	0.713293	0.478949	0.33804	0.74952	0.388109	0.202382	0.252568	0.187061	0.444294	0.374428	0.537877
ARCME-NEURO27	0.0899939	8.45697e-09	6.30744e-09	FALSE	0.124624	0.372427	0.272797	0.207511	0.0244811	0.0423737	0.318698	0.784658	0.849471	0.190469	0.754179	0.00101086	0.827728	0.588284	0.759051	0.999328	0.392131	0.153091	0.0306132	0.361116	0.493922	0.0690057	0.532338	0.309248	0.640453	0.370014	0.834453	0.57744	0.17462	0.462411	0.534203	0.686626	0.374691	0.401278	0.450357	0.39033	0.815745	0.19405
HYPR-NEURO22	0.0926424	1.72407e-08	1.30152e-08	FALSE	0.880222	0.359224	0.368115	0.633726	0.0471433	0.0829209	0.0169543	0.0585216	0.202106	0.0062366	0.0765772	0.110037	0.318736	0.597817	0.352522	0.121208	0.0745896	0.210452	0.280247	0.862758	0.470229	0.461426	0.499213	0.0206989	0.0275391	0.224728	0.89837	0.619954	0.347882	0.0301208	0.587549	0.0133505	0.0394397	0.343466	0.356544	0.387243	0.804112	0.261994
HYPR-NEURO36	0.0974675	5.56706e-08	4.29518e-08	FALSE	0.279347	0.593554	0.350475	0.427019	0.657398	0.179673	0.271379	0.184547	0.529327	0.141707	0.461007	0.717357	0.0740006	0.0727431	0.991286	0.118024	0.670742	0.883885	0.675037	0.184141	0.257543	0.148585	0.826927	0.583509	0.252469	0.166369	0.405792	0.430149	0.728908	0.928295	0.127664	0.476127	0.151601	0.458173	0.409581	0.0699514	0.115977	0.21495
POA-NEURO51	0.0982102	8.93213e-09	6.91439e-09	FALSE	0.873671	0.00188238	0.614806	0.141178	0.0211181	0.320362	0.333676	0.426116	0.823369	0.818877	0.923213	0.0267597	0.654982	0.87051	0.229499	0.997057	0.584521	0.0871836	0.11312	0.622942	0.129313	0.4176	0.0869284	0.308158	0.0125863	0.0336245	0.08584	0.567703	0.120136	0.0872742	0.648242	0.866146	0.343368	0.727629	0.369803	0.572952	0.974505	0.0331357
POA-NEURO41	0.0992732	6.3717e-09	4.95581e-09	FALSE	0.695352	0.273096	0.263107	0.0538517	0.00487011	0.360488	0.430738	0.894758	0.949722	0.00993492	0.881102	0.000694865	0.178866	0.814964	0.704678	0.944867	0.881453	0.00587636	0.000486889	0.152043	0.912235	0.338005	0.208032	0.114348	0.593875	0.018841	0.146043	0.579792	0.500845	0.0543753	0.334666	0.901385	0.20379	0.824396	0.711009	0.780135	0.979919	0.00976976
HYPR-NEURO8	0.0993776	1.68293e-08	1.30957e-08	FALSE	0.448024	0.0924335	0.485308	0.0458859	0.284938	0.933369	0.953773	0.752337	0.19819	0.211885	0.976782	0.0362635	0.0885738	0.0863857	0.917959	0.397401	0.033976	0.130491	0.144047	0.483756	0.869834	0.226783	0.339802	0.257024	0.00776498	0.269625	0.125551	0.482493	0.504813	0.0244689	0.274716	0.913871	0.135129	0.024849	0.0583318	0.533167	0.828971	0.216698
HYPR-NEURO34	0.101616	1.28143e-08	1.0071e-08	FALSE	0.0950614	0.764431	0.41425	0.416108	0.0648806	0.69305	0.187639	0.346073	0.253484	0.253981	0.301425	0.173911	0.182431	0.858426	0.128215	0.43502	0.484257	0.387977	0.700047	0.564911	0.704609	0.605977	0.0717273	0.199005	0.178848	0.0857465	0.028358	0.834673	0.770189	0.825262	0.273072	0.412319	0.367995	0.359322	0.631261	0.133763	0.340632	0.104856
ARCME-NEURO7	0.101983	6.91507e-09	5.44352e-09	FALSE	0.827275	0.559182	0.262739	0.622968	1.36474e-08	0.655233	0.772389	0.517212	0.314426	0.04509	0.726377	0.00541162	0.0671688	0.81241	0.337297	0.730549	0.149866	0.357742	0.0622036	0.599339	0.245406	0.440195	0.8124	0.0377585	0.35726	0.135625	0.351036	0.423797	0.115685	6.96177e-05	0.137411	0.824837	0.183852	0.891314	0.189413	0.740599	0.899307	0.0083299
POA-NEURO18	0.102743	6.67535e-09	5.27248e-09	FALSE	0.586043	0.00329923	0.35552	0.0607992	0.0127473	0.430291	0.4489	0.707654	0.979978	0.0292753	0.928369	0.00454957	0.684935	0.63072	0.714495	0.938292	0.977191	0.0529534	9.49847e-05	0.967648	0.134994	0.735229	0.0320615	0.149199	0.00537404	0.00967204	0.194455	0.204383	0.625748	0.0123595	0.318759	0.811088	0.0654338	0.563279	0.898277	0.82837	0.997308	0.00251662
LHA-NEURO26	0.103868	9.89692e-09	7.85587e-09	FALSE	0.974306	0.231155	0.873918	0.140001	0.0941458	0.201416	0.921957	0.1488	0.612894	0.0864583	0.956305	0.12873	0.653536	0.508873	0.712203	0.478389	0.352504	0.476473	0.120194	0.817811	0.575099	0.0616972	0.397662	0.0146015	0.255275	0.0138868	0.540539	0.974084	0.70058	0.332487	0.717291	0.876486	0.650461	0.810602	0.5166	0.685844	0.985506	0.0226224
HYPC-NEURO12	0.111557	9.02266e-09	7.406e-09	FALSE	0.603616	0.135884	0.00265564	0.196787	0.00410534	0.0917044	0.285735	0.434944	0.302959	0.0214202	0.460702	5.39327e-05	0.129483	0.690634	0.379424	0.720871	0.208701	0.205383	0.000373308	0.209488	0.966761	0.448952	0.832648	0.157683	0.0399258	4.36078e-05	0.374433	0.3916	0.064756	0.0006058	0.00483339	0.355344	0.424915	0.268354	0.252308	0.178022	0.87359	0.00481774
VMH-NEURO21	0.119685	8.0496e-09	6.84163e-09	FALSE	0.0248658	0.10142	0.614804	0.332721	0.0247535	0.214777	0.0170698	0.715154	0.795534	0.540528	0.47026	0.082001	0.961107	0.384847	0.629844	0.448289	0.401707	0.000163452	0.333138	0.154907	0.857755	0.27391	0.380273	0.167109	0.0302804	0.0162267	0.0497141	0.25417	0.441056	0.0521533	0.848071	0.694196	0.314675	0.0797028	0.237484	0.0283772	0.134753	0.0134953
ARCME-NEURO28	0.123193	7.99118e-09	6.89386e-09	FALSE	0.154361	0.64665	0.133852	0.0110418	0.327155	0.862895	0.785979	0.351413	0.16718	0.463845	0.637674	0.125838	0.982212	0.980993	0.995164	0.953456	0.280187	0.0700323	0.12304	0.845687	0.786346	0.929638	0.165405	0.089159	0.4809	0.0811374	0.23283	0.464492	0.114785	0.0374273	0.497374	0.869402	0.366236	0.704689	0.365797	0.11816	0.652976	0.0726996
LHA-NEURO28	0.123207	6.82774e-09	5.89054e-09	FALSE	0.10986	0.0705545	0.304206	0.207113	0.00413406	0.0260069	0.111993	0.172531	0.453973	0.0129471	0.397799	0.029035	0.517437	0.903668	0.345916	0.875716	0.267532	0.0773294	0.0756619	0.997049	0.0971303	0.262482	0.240582	0.00229403	0.0276704	0.0573402	0.0369907	0.192823	0.0038175	0.00109455	0.118238	0.181707	0.0835826	0.458084	0.121049	0.135444	0.824695	0.00207849
HYPR-NEURO15	0.123532	1.97623e-08	1.70731e-08	FALSE	0.774464	0.435908	0.135487	0.188573	0.0362176	0.0317918	0.768651	0.140957	0.766188	0.00284499	0.51147	0.0616446	0.013361	0.724998	0.251275	0.617991	0.378234	0.000670576	0.0892056	0.238643	0.124496	0.0452852	0.583554	0.0638872	0.0102626	0.0573534	0.148847	0.601665	0.312796	0.0379009	0.385387	0.307833	0.0213137	0.261145	0.243992	0.204732	0.847288	0.0245397
HYPR-NEURO12	0.123541	1.17159e-08	1.0122e-08	FALSE	0.190623	0.229142	0.522584	0.762192	0.0544893	0.0262571	0.181156	0.550471	0.140366	0.008419	0.577584	0.172288	0.0529551	0.244161	0.168739	0.0928034	0.0831452	0.914727	0.293993	0.161142	0.121956	0.0371611	0.944921	0.448814	0.117563	0.0722236	0.432212	0.174872	0.887242	0.19174	0.169318	0.263518	0.419042	0.0657416	0.148799	0.0512018	0.531787	0.31189
HYPR-NEURO46	0.127446	2.74038e-08	2.40691e-08	FALSE	0.629678	0.168264	0.325545	0.291979	0.298591	0.794779	0.160141	0.129522	0.779264	0.0345582	0.187891	0.192398	0.98833	0.955269	0.759597	0.155954	0.184702	0.180654	0.130171	0.736347	0.937296	0.695172	0.09528	0.13839	0.158195	0.0172209	0.165246	0.117987	0.717182	0.175355	0.275458	0.0572381	0.508339	0.0587389	0.13977	0.198979	0.354668	0.0769134
LHA-NEURO11	0.127502	6.55188e-09	5.75596e-09	FALSE	0.331325	0.0497914	0.00868367	0.289101	0.0519103	0.201968	0.688024	0.385935	0.537859	0.0301146	0.873687	0.000792972	0.0729011	0.459856	0.12523	0.978179	0.281058	0.151892	0.000570679	0.841756	0.512372	0.784174	0.64139	0.0220476	0.489037	2.18999e-05	0.433852	0.55551	0.0325708	0.00544603	0.213989	0.874302	0.108719	0.0599338	0.339659	0.667291	0.837688	0.00187678
POA-NEURO37	0.130077	5.31454e-09	4.71973e-09	FALSE	0.74792	0.148313	0.220687	0.0467476	0.0265725	0.202374	0.136786	0.617324	0.882806	0.0981877	0.346369	0.000694414	0.505118	0.964955	0.095868	0.150771	0.642673	0.411581	0.00402313	0.113894	0.573687	0.0481914	0.517038	0.108907	0.404348	0.171174	0.491081	0.968986	0.560388	0.344296	0.911213	0.0678652	0.530279	0.301688	0.408844	0.569493	0.947547	0.0969267
POA-NEURO27	0.131281	6.05194e-09	5.4018e-09	FALSE	0.543722	0.029094	0.00577051	0.366374	0.000176575	0.060534	0.405908	0.837522	0.116088	0.0604174	0.826174	1.0412e-08	0.224728	0.955119	0.633592	0.977833	0.222477	0.276153	2.82413e-08	0.0803532	0.668772	0.438078	0.284898	0.0515261	0.0685374	0.00567145	0.280325	0.462811	0.0423457	0.00017671	0.00569423	0.554825	0.901939	0.766277	0.239677	0.733321	0.984005	0.004334
POA-NEURO24	0.133839	5.677e-09	5.12169e-09	FALSE	0.664248	0.0520323	0.00572518	0.0828806	3.1649e-05	0.427762	0.910854	0.87541	0.883383	0.025717	0.990316	1.9435e-05	0.288915	0.863534	0.570091	0.995687	0.915729	0.0276283	7.40981e-11	0.940884	0.863714	0.513572	0.276534	0.0408759	0.0989472	0.00344779	0.528054	0.282016	0.0100149	1.30972e-07	0.154787	0.891805	0.391641	0.677147	0.87982	0.724373	0.974152	3.809e-05
ARCME-NEURO3	0.13536	5.9016e-09	5.35824e-09	FALSE	0.0265949	0.978271	0.433029	0.665996	0.0197933	0.0632206	0.230602	0.520102	0.191576	0.109697	0.617539	0.212065	0.0232267	0.579714	0.19172	0.947236	0.489262	0.133628	0.127344	0.33692	0.444106	0.113045	0.405344	0.260219	0.0164226	0.0396165	0.307635	0.341705	0.229792	0.0219236	0.914581	0.30795	0.177783	0.241637	0.912484	0.259671	0.907953	0.118811
VMH-NEURO9	0.14101	1.35336e-08	1.25801e-08	FALSE	0.347003	0.0247663	0.692804	0.216451	0.250385	0.351301	0.015899	0.996366	0.251288	0.815841	0.0146444	0.0269421	0.600967	0.205649	0.540634	0.118632	0.327752	0.579108	0.0548088	0.0961732	0.400131	0.02028	0.726659	0.963165	0.765756	0.382649	0.510425	0.952222	0.585934	0.140564	0.828666	0.0242317	0.203681	0.252092	0.574053	0.0915928	0.167755	0.628035
POA-NEURO58	0.142898	7.40877e-09	6.94103e-09	FALSE	0.0599027	0.228487	0.189371	0.185278	0.0322847	0.583702	0.31685	0.796133	0.510722	0.383768	0.287312	0.00210154	0.663675	0.235832	0.488698	0.905559	0.363049	0.0568493	0.000962398	0.509769	0.640849	0.104046	0.0244639	0.0149154	0.0120645	0.104161	0.0235203	0.0563992	0.139369	0.101734	0.514686	0.357989	0.110675	0.38816	0.22065	0.634894	0.830381	0.0158964
HYPC-NEURO20	0.144092	4.258e-08	4.00899e-08	FALSE	0.892239	0.29337	0.202432	0.631459	0.662977	0.426692	0.996718	0.550043	0.636616	0.0413941	0.800035	0.840797	0.48685	0.256956	0.922233	0.952796	0.273293	0.0552534	0.432422	0.203179	0.894945	0.470356	0.123009	0.349482	0.819048	0.32302	0.217288	0.0261755	0.173274	0.410057	0.0577772	0.992181	0.301286	0.174842	0.24427	0.134247	0.503123	0.00975971
LHA-NEURO14	0.14504	1.07613e-08	1.01719e-08	FALSE	0.0607362	0.0167472	0.909715	0.787735	0.188119	0.41253	0.52202	0.750295	0.792429	0.519804	0.583877	0.12719	0.202532	0.0949131	0.228516	0.162145	0.715317	0.0589067	0.13275	0.140794	0.739499	0.52716	0.687114	0.0779736	0.00578355	0.070491	0.0376899	0.421409	0.158949	0.0184815	0.830575	0.334851	0.0181828	0.0119377	0.242264	0.0420633	0.140414	0.0334105
HYPR-NEURO6	0.147192	9.75877e-09	9.30688e-09	FALSE	0.407983	0.187745	0.848556	0.555189	0.162067	0.398544	0.151539	0.221278	0.757538	0.708864	0.0958468	0.131278	0.571144	0.849783	0.871752	0.0730501	0.38272	0.517415	0.747982	0.337549	0.362397	0.209387	0.735784	0.768737	0.483604	0.480625	0.633073	0.095649	0.0822365	0.422426	0.897267	0.0987885	0.0609489	0.136587	0.175296	0.351421	0.710801	0.52152
HYPR-NEURO3	0.153342	8.31619e-09	8.13554e-09	FALSE	0.817042	0.0211449	0.00163463	0.946073	0.323123	0.392833	0.418596	0.0161632	0.0769397	0.0834129	0.500286	0.302598	0.377209	0.718625	0.551812	0.160498	0.197838	0.220187	0.219261	0.339788	0.899031	0.139673	0.0241168	0.672056	0.355934	0.234967	0.0561338	0.0163216	0.0962463	0.135345	0.652046	0.754524	0.93477	0.271491	0.507924	0.0433566	0.290593	0.29413
HYPC-NEURO11	0.153427	8.84589e-09	8.65679e-09	FALSE	0.971949	0.619044	0.315632	0.271282	0.278721	0.0469152	0.373614	0.00997924	0.404767	0.0716414	0.205572	0.0269181	0.174376	0.999202	0.0704658	0.133547	0.190091	0.182974	0.00223403	0.185084	0.445453	0.471867	0.384146	0.0985387	0.0851163	0.207928	0.418201	0.494726	0.360344	0.393147	0.735753	0.188658	0.379756	0.182586	0.30174	0.0931738	0.159237	0.189365
VMH-NEURO32	0.157238	9.72225e-09	9.66546e-09	FALSE	0.879637	0.0965936	0.427387	0.538512	0.8065	0.129205	0.858978	0.937695	0.518618	0.532651	0.843029	0.540958	0.985747	0.547095	0.652409	0.693711	0.810374	0.702121	0.358515	0.454925	0.0708346	0.785523	0.2284	0.264016	0.447641	0.207192	0.471783	0.996036	0.304384	0.770797	0.902814	0.61424	0.292787	0.993803	0.751139	0.442092	0.651464	0.0817212
HYPC-OPC2	0.161088	7.5333e-09	7.60943e-09	FALSE	0.467089	0.258462	0.156172	0.72235	0.114559	0.851484	0.182237	0.393448	0.948244	0.996788	0.137433	0.282476	0.3088	0.396796	0.246561	0.0299986	0.578902	0.132469	0.422561	0.471258	0.153136	0.25651	0.813678	0.208759	0.0237676	0.326321	0.622209	0.240098	0.845681	0.214795	0.819872	0.22251	0.479382	0.0913494	0.303979	0.0917463	0.0170254	0.46165
VMH-NEURO13	0.169517	7.63099e-09	7.98158e-09	FALSE	0.94855	0.573076	0.038355	0.191701	0.00580221	0.0539691	0.39164	0.942219	0.611203	0.492524	0.537448	0.0788819	0.703769	0.856049	0.839043	0.817818	0.223743	0.604566	0.0592296	0.388472	0.512885	0.852262	0.991514	0.00336417	0.616243	0.135802	0.839471	0.613777	0.745194	0.0910664	0.694542	0.525195	0.336868	0.698488	0.35304	0.849087	0.952474	0.291046
VMH-NEURO30	0.173025	9.5534e-09	1.01386e-08	FALSE	0.901243	0.709207	0.259496	0.866527	0.243065	0.411331	0.75251	0.967939	0.732875	0.900331	0.771929	0.105616	0.939844	0.657937	0.997019	0.991002	0.552897	0.182184	0.119121	0.857826	0.672214	0.640499	0.568777	0.582779	0.448757	0.114226	0.319655	0.88372	0.687318	0.437339	0.392369	0.715556	0.709421	0.519951	0.399229	0.859959	0.954498	0.22804
VMH-NEURO20	0.178282	5.67286e-09	6.15324e-09	FALSE	0.0150242	0.361405	0.106889	0.802458	0.0643142	0.533718	0.408549	0.158045	0.961579	0.758043	0.651907	0.56376	0.757809	0.860346	0.799814	0.571669	0.645234	0.254965	0.548986	0.317723	0.985136	0.742856	0.398055	0.599196	0.0756198	0.380763	0.0176647	0.085893	0.010412	0.462895	0.683813	0.747846	0.0787492	0.973622	0.531939	0.472132	0.3976	0.367626
HYPR-NEURO45	0.183387	9.30363e-09	1.03083e-08	FALSE	0.834315	0.0597531	0.539943	0.405295	0.00461097	0.142917	0.923047	0.525135	0.19051	0.153514	0.328882	0.0066118	0.26649	0.396993	0.120041	0.985931	0.0237938	0.0108506	0.000517033	0.985274	0.54924	0.0424288	0.0612853	0.0233355	0.539089	0.0816493	0.189601	0.100298	0.0261246	2.25978e-06	0.730345	0.32753	0.515039	0.102439	0.0481684	0.607345	0.979586	0.0572665
POA-NEURO38	0.189209	4.21478e-09	4.7851e-09	FALSE	0.879945	0.0408788	0.153022	0.129585	0.00454891	0.658455	0.480323	0.0906125	0.794889	0.000693277	0.385142	0.00020518	0.274923	0.819884	0.118315	0.972857	0.438742	0.0162339	0.000172034	0.798457	0.197833	0.301347	0.0915548	0.0173459	0.0655114	0.000178696	0.0296123	0.0465926	0.0625545	0.00021066	0.739367	0.428232	0.0156866	0.797659	0.186645	0.871446	0.999848	0.000475125
HYPC-NEURO6	0.189944	7.41131e-09	8.44013e-09	FALSE	0.890481	0.185591	0.0539426	0.213855	0.00917106	0.035594	0.337841	0.794328	0.544675	0.00394608	0.132019	0.0361809	0.519632	0.843633	0.329666	0.203482	0.496854	0.0861988	0.0871826	0.608066	0.978277	0.978337	0.791588	0.00192256	0.0941177	0.00895227	0.664986	0.539757	0.117529	0.00436194	0.395346	0.103974	0.143749	0.147033	0.759978	0.470073	0.268155	0.0225415
HYPC-NEURO9	0.190858	8.06497e-09	9.21986e-09	FALSE	0.88671	0.253849	0.322474	0.922568	0.367774	0.280387	0.0389707	0.0833802	0.148539	0.198269	0.238658	0.00717477	0.299148	0.226761	0.29053	0.0469189	0.180351	0.855393	0.0184353	0.518988	0.995431	0.947564	0.731312	0.937877	0.470047	0.675983	0.836707	0.712637	0.737388	0.00702609	0.398513	0.105815	0.00579936	0.146405	0.247056	0.452901	0.264182	0.256158
VMH-NEURO8	0.192973	1.14108e-08	1.31614e-08	FALSE	0.300689	0.0896694	0.252217	0.598944	0.00551133	0.201907	0.225512	0.529855	0.497782	0.301868	0.207934	0.173681	0.772551	0.102887	0.501183	0.497721	0.361699	0.898046	0.348123	0.151721	0.162175	0.0304181	0.120061	0.548185	0.919552	0.230195	0.626097	0.5663	0.735614	0.492361	0.584398	0.0926242	0.327504	0.688738	0.264849	0.649052	0.824588	0.195857
ARCME-NG21	0.193303	5.49858e-09	6.35093e-09	FALSE	0.871757	0.621484	0.533074	0.853337	0.00603641	0.679418	0.0924752	0.939034	0.971038	0.999787	0.128649	0.401564	0.540968	0.453232	0.438142	0.126726	0.854429	0.639717	0.453228	0.563795	0.0711503	0.286382	0.871435	0.829675	0.257795	0.854612	0.349968	0.303295	0.43013	0.133196	0.999865	0.158354	0.629775	0.256301	0.668737	0.540113	0.200335	0.655945
HYPC-NEURO25	0.20039	1.5267e-08	1.817e-08	FALSE	0.883709	0.332746	0.238804	0.389026	0.12738	0.35653	0.150544	0.793588	0.435097	0.433987	0.42946	0.160145	0.0434949	0.284222	0.2711	0.210248	0.657761	0.294476	0.579637	0.203694	0.759335	0.475797	0.41552	0.125911	0.199141	0.0895945	0.7583	0.362132	0.408482	0.773708	0.0722843	0.38131	0.138987	0.579603	0.708729	0.21345	0.432144	0.110163
HYPC-NEURO32	0.201167	1.55927e-08	1.8619e-08	FALSE	0.237429	0.131888	0.716052	0.115289	0.321614	0.0869789	0.490736	0.734426	0.655934	0.0116707	0.280315	0.020917	0.107904	0.652947	0.278476	0.249729	0.498598	0.409569	0.0572039	0.992962	0.695187	0.272409	0.44083	0.143769	0.152873	0.238289	0.871492	0.848119	0.517715	0.618916	0.164159	0.207274	0.210679	0.39174	0.436118	0.354912	0.683014	0.252726
ARCME-PATU4	0.201226	4.073e-09	4.86475e-09	FALSE	0.0808777	0.616787	0.945757	0.475442	0.0609746	0.529793	0.0932993	0.674983	0.601506	0.961027	0.098226	0.862402	0.448142	0.15741	0.46193	0.024413	0.0952228	0.908417	0.657816	0.154214	0.404101	0.290334	0.0644174	0.506484	0.417313	0.523857	0.604007	0.586475	0.379957	0.127465	0.358621	0.0574989	0.258682	0.780905	0.0392833	0.802951	0.59328	0.154813
VMH-NEURO3	0.204135	5.33293e-09	6.44897e-09	FALSE	0.760069	0.280703	0.274247	0.488332	0.450751	0.0785794	0.953666	0.558172	0.221742	0.770974	0.819193	0.221317	0.239124	0.338995	0.341175	0.40023	0.424748	0.528655	0.638941	0.132358	0.922145	0.455443	0.785875	0.0754897	0.266184	0.682852	0.450321	0.820026	0.792478	0.129162	0.0529037	0.911071	0.0584646	0.251274	0.495867	0.362424	0.397262	0.415
HYPR-NEURO41	0.210078	7.27156e-09	9.02008e-09	FALSE	0.763459	0.0131855	0.242873	0.276106	0.0877057	0.452099	0.301451	0.184343	0.564601	0.226477	0.335062	0.310802	0.0690552	0.189648	0.0911917	0.722493	0.173417	0.721828	0.246492	0.668986	0.649666	0.0818756	0.115433	0.788712	0.304989	0.706217	0.261352	0.380437	0.432563	0.397349	0.382131	0.0810183	0.0154779	0.796734	0.242152	0.242637	0.157288	0.232946
VMH-NEURO40	0.216702	1.07176e-08	1.36813e-08	FALSE	0.03338	0.186845	0.0252522	0.0270067	0.754605	0.154638	0.143421	0.0709693	0.193766	0.528912	0.352657	0.160767	0.101032	0.997286	0.193766	0.16396	0.258461	0.644335	0.267855	0.227841	0.677617	0.877871	0.075934	0.52352	0.374976	0.0902334	0.213503	0.154118	0.745918	0.28965	0.117636	0.324605	0.117296	0.082097	0.290035	0.592117	0.728695	0.247214
HYPR-NEURO39	0.218353	2.11205e-08	2.71553e-08	FALSE	0.883199	0.136958	0.751837	0.66728	0.0403126	0.14984	0.299826	0.505972	0.301241	0.215209	0.615182	0.229849	0.157804	0.178069	0.810446	0.284365	0.14642	0.0371456	0.390089	0.40796	0.88146	0.409381	0.482116	0.743486	0.795053	0.0999931	0.921212	0.157451	0.289448	0.441544	0.189766	0.448983	0.160943	0.251524	0.131741	0.341664	0.492957	0.118577
LHA-NEURO23	0.227155	5.4983e-09	7.34822e-09	FALSE	0.0771424	0.00078181	0.816695	0.0370246	0.000348087	0.218538	0.161212	0.49991	0.921296	0.0299189	0.454762	0.031857	0.187415	0.606049	0.164663	0.186409	0.305012	0.362297	0.0143169	0.966518	0.199527	0.0285923	0.163065	0.0228363	0.652765	0.0779871	0.995778	0.0330592	0.245273	0.0440216	0.220471	0.22556	0.858987	0.493394	0.570374	0.609733	0.49232	0.310393
POA-NEURO12	0.23271	3.70718e-09	5.07867e-09	FALSE	0.955584	0.302271	0.440764	0.797026	0.00922162	0.923926	0.736035	0.517656	0.777121	0.00616654	0.949984	0.0598519	0.866168	0.892601	0.477397	0.99366	0.641261	0.00688718	0.0206113	0.913205	0.981207	0.942809	0.585528	0.000523944	0.197366	0.0221259	0.453898	0.367972	0.0878254	0.516964	0.511528	0.655976	0.322483	0.568546	0.534109	0.681939	0.932081	0.0143316
VMH-NEURO5	0.240846	5.60696e-09	7.96914e-09	FALSE	0.189394	0.239572	0.303679	0.961487	0.0866944	0.101613	0.715873	0.788163	0.707707	0.369306	0.755889	0.113146	0.335316	0.416043	0.739883	0.849906	0.392504	0.571649	0.0606862	0.988464	0.876868	0.703763	0.813356	0.105088	0.235287	0.0271874	0.89865	0.880588	0.551299	0.292624	0.222416	0.868815	0.425316	0.710573	0.215955	0.789435	0.935238	0.0246384
LHA-OPC2	0.250991	3.14464e-09	4.68388e-09	FALSE	0.107792	0.888801	0.456797	0.783109	0.392759	0.79468	0.0493536	0.100129	0.412096	0.992897	0.347351	0.617277	0.522289	0.0456565	0.188013	0.0173451	0.138337	0.895192	0.926459	0.18456	0.140797	0.0648569	0.792578	0.366894	0.111967	0.283905	0.943567	0.345345	0.352078	0.0828358	0.959709	0.10328	0.483361	0.0283573	0.643244	0.0152963	0.000625009	0.457652
LHA-NEURO12	0.251357	4.22253e-09	6.30018e-09	FALSE	0.707049	0.159549	0.338957	0.190765	0.000182394	0.22263	0.191205	0.340263	0.454473	0.121476	0.373615	0.0829392	0.288149	0.458775	0.826598	0.991839	0.140947	0.10569	0.00589628	0.766734	0.809005	0.188526	0.633069	0.0756284	0.697152	0.00563764	0.615581	0.554897	0.0102158	0.13472	0.158065	0.241301	0.57958	0.13727	0.0959973	0.688729	0.986699	0.00237258
HYPR-NEURO18	0.253161	7.00703e-09	1.05436e-08	FALSE	0.982625	0.286761	0.383334	0.659072	0.717457	0.406928	0.668722	0.951189	0.944712	0.429135	0.516809	0.0341396	0.0641185	0.51807	0.583194	0.610033	0.886152	0.339533	0.0963471	0.960776	0.619712	0.50897	0.811115	0.393876	0.821479	0.177859	0.887855	0.87036	0.446232	0.0465805	0.761647	0.492094	0.0260089	0.0315639	0.779525	0.604823	0.856811	0.171501
ARCME-PATU5	0.255455	4.5966e-09	6.99187e-09	FALSE	0.750485	0.377718	0.442406	0.679129	0.42715	0.643882	0.167244	0.596832	0.310304	0.981667	0.145839	0.895768	0.0610831	0.0679577	0.713609	0.163713	0.141563	0.763229	0.716962	0.217292	0.390779	0.200272	0.0699765	0.724689	0.273573	0.913719	0.119846	0.172562	0.39882	0.318484	0.357187	0.135643	0.0985713	0.653683	0.105859	0.452079	0.538067	0.783841
VMH-NEURO2	0.261276	1.23621e-08	1.93334e-08	FALSE	0.200878	0.443801	0.964168	0.786313	0.0213136	0.337915	0.915104	0.735436	0.910984	0.752536	0.676494	0.610125	0.317803	0.127671	0.505903	0.740965	0.570391	0.872365	0.0419024	0.771371	0.48408	0.638229	0.211061	0.602092	0.380734	0.341756	0.0810168	0.555743	0.251121	0.178953	0.68829	0.784001	0.389618	0.908677	0.740493	0.405177	0.565739	0.0442971
POA-NEURO13	0.261906	4.95542e-09	7.77345e-09	FALSE	0.0910392	0.384043	0.960603	0.353216	0.695545	0.36146	0.223946	0.679843	0.6567	0.205562	0.296442	0.0830833	0.091869	0.769215	0.899277	0.694831	0.731742	0.0899295	0.542692	0.269147	0.989459	0.450028	0.192256	0.289343	0.396593	0.248151	0.427722	0.902845	0.399684	0.812577	0.168741	0.570296	0.134037	0.398229	0.289475	0.203474	0.356959	0.37562
POA-NEURO7	0.270508	3.7621e-09	6.15449e-09	FALSE	0.638151	0.0902173	0.298601	0.633747	0.0843795	0.252842	0.231858	0.651868	0.681024	0.785053	0.338966	0.182811	0.833389	0.589334	0.814103	0.531749	0.606838	0.373443	0.323705	0.214928	0.759438	0.259855	0.613576	0.81406	0.481664	0.859953	0.790811	0.457323	0.369151	0.985197	0.52915	0.366154	0.411099	0.97265	0.544438	0.708197	0.825995	0.619326
HYPR-NEURO38	0.272074	1.3063e-08	2.15364e-08	FALSE	0.810278	0.158903	0.0297334	0.188742	0.384721	0.731246	0.0724704	0.893384	0.454564	0.260265	0.0387299	0.498709	0.565871	0.57897	0.88248	0.0750466	0.268756	0.438434	0.765829	0.541134	0.51989	0.155972	0.931157	0.310476	0.904058	0.219583	0.749503	0.103681	0.708289	0.800152	0.566528	0.103533	0.797484	0.945868	0.0310399	0.529979	0.806576	0.854013
HYPC-NEURO18	0.272931	4.57558e-09	7.57581e-09	FALSE	0.247641	0.321489	0.826589	0.66558	0.158612	0.0353325	0.340083	0.0616202	0.222791	0.830551	0.835946	0.319597	0.636842	0.932158	0.991294	0.22747	0.301287	0.185023	0.414514	0.578184	0.575886	0.567109	0.487523	0.627134	0.787572	0.380806	0.4623	0.25349	0.136977	0.254939	0.210827	0.859998	0.0224175	0.711261	0.926247	0.75288	0.473722	0.169583
POA-NEURO47	0.274534	2.21868e-09	3.70301e-09	FALSE	0.217548	0.191415	0.187419	0.181577	0.000217791	0.0251927	0.212825	0.671601	0.0609131	0.00865944	0.273373	2.38729e-08	0.10801	0.859453	0.841606	0.970012	0.0694001	0.0976236	1.43181e-06	0.138863	0.454906	0.330889	0.25361	0.00697692	0.0217628	0.00333619	0.627076	0.462261	0.305223	8.82642e-06	0.0101326	0.0716293	0.634033	0.593278	0.205689	0.872904	0.989514	0.0277798
VMH-NEURO10	0.276238	9.71976e-09	1.63618e-08	FALSE	0.157721	0.323619	0.142502	0.409134	0.553842	0.473914	0.055564	0.937109	0.0431859	0.331301	0.118345	0.148299	0.26163	0.681305	0.0436796	0.17904	0.0549755	0.97448	0.473563	0.627592	0.185966	0.126599	0.36827	0.714082	0.877492	0.813791	0.78929	0.994186	0.843382	0.555257	0.321376	0.0646989	0.0854196	0.178818	0.234173	0.32196	0.340056	0.571739
HYPR-NEURO4	0.276861	5.02653e-09	8.48801e-09	FALSE	0.139378	0.0367625	0.0197462	0.860505	0.00925233	0.360447	0.743703	0.851222	0.548022	0.136406	0.908127	0.26016	0.209614	0.5418	0.432364	0.535115	0.489128	0.0508141	0.0838646	0.807422	0.542162	0.053794	0.153867	0.447105	0.379763	0.223084	0.541627	0.0408922	0.553602	0.297599	0.199053	0.968419	0.214913	0.616816	0.722306	0.0404506	0.198822	0.709928
HYPR-NEURO35	0.278948	5.29844e-09	9.04218e-09	FALSE	0.709506	0.128008	0.00813272	0.78322	0.0421938	0.209601	0.159276	0.92662	0.357981	0.194955	0.231381	0.115358	0.131003	0.145794	0.589063	0.293749	0.133332	0.342915	0.12833	0.515123	0.344089	0.220802	0.791766	0.350947	0.594685	0.454322	0.585754	0.395038	0.451988	0.291444	0.425999	0.374741	0.626579	0.744372	0.0983278	0.512956	0.9231	0.137388
HYPC-NEURO13	0.284255	5.3817e-09	9.43746e-09	FALSE	0.397653	0.24808	0.659085	0.0317169	0.00232347	0.132162	0.495154	0.288098	0.0591411	0.220385	0.290603	0.132229	0.239475	0.34763	0.107163	0.850497	0.155834	0.213634	0.17561	0.554469	0.317143	0.278965	0.632323	0.347934	0.1653	0.0330065	0.144253	0.254217	0.12042	0.0181752	0.826192	0.133616	0.0396731	0.923812	0.179832	0.543343	0.212325	0.0278641
HYPC-NEURO10	0.285734	5.34193e-09	9.43987e-09	FALSE	0.944823	0.107683	0.0570896	0.248004	0.000627507	0.794247	0.579154	0.117435	0.101556	0.735199	0.84012	0.109095	0.0310702	0.654165	0.0898343	0.598993	0.120894	0.742671	0.13818	0.844924	0.492922	0.600016	0.792201	0.534523	0.91098	0.712655	0.991457	0.0796392	0.297128	0.223496	0.828296	0.540828	0.123534	0.160336	0.345919	0.530475	0.674377	0.470003
HYPC-NEURO3	0.304071	3.73858e-09	7.29155e-09	FALSE	0.883765	0.0294161	0.0442611	0.116778	0.13753	0.0476397	0.187769	0.198049	0.399697	0.292057	0.62964	0.417971	0.191939	0.242396	0.269696	0.0150711	0.734703	0.151535	0.499259	0.296244	0.220692	0.223129	0.532448	0.335708	0.264482	0.329731	0.565461	0.354831	0.0898506	0.855091	0.614072	0.763111	0.204336	0.103288	0.536236	0.74287	0.544413	0.739021
HYPR-NEURO54	0.304398	4.72012e-09	9.2227e-09	FALSE	0.887041	0.604605	0.958445	0.708794	0.280757	0.411649	0.24472	0.602875	0.569722	0.364652	0.141704	0.719333	0.129542	0.132204	0.153836	0.0432327	0.394149	0.356674	0.69653	0.972856	0.967129	0.351611	0.727302	0.246501	0.210112	0.60803	0.410333	0.986565	0.0292365	0.609624	0.439614	0.069539	0.674145	0.201884	0.279842	0.0866115	0.0653325	0.406472
HYPR-NEURO10	0.308213	5.60783e-09	1.1195e-08	FALSE	0.903398	0.605022	0.108361	0.5228	0.198575	0.228265	0.115634	0.558486	0.623571	0.0363698	0.147091	0.0928646	0.217034	0.164413	0.265642	0.675375	0.399129	0.284737	0.00584454	0.538018	0.403242	0.234053	0.317399	0.355999	0.189122	0.0020243	0.0763731	0.853498	0.961256	0.454272	0.649497	0.20114	0.0308712	0.0633331	0.282511	0.708152	0.967715	0.00346673
POA-NEURO15	0.309293	3.17684e-09	6.38103e-09	FALSE	0.861901	0.50796	0.487168	0.665159	0.077383	0.609157	0.429559	0.56319	0.786389	0.00614001	0.344271	0.0971107	0.262926	0.732757	0.991398	0.255722	0.552517	0.869354	0.479583	0.483661	0.809427	0.0198595	0.665654	0.1598	0.209224	0.0553872	0.390024	0.618273	0.175052	0.769577	0.552514	0.576367	0.18379	0.692618	0.0913942	0.278662	0.149048	0.153981
VMH-NEURO29	0.312168	4.94102e-09	1.00896e-08	FALSE	0.0839104	0.463974	0.148671	0.989745	0.247539	0.181093	0.249816	0.257134	0.440638	0.798118	0.280532	0.192041	0.881921	0.162812	0.304567	0.338257	0.514151	0.840629	0.263065	0.253117	0.94467	0.231578	0.304527	0.99274	0.0322904	0.938209	0.100333	0.908697	0.609744	0.606773	0.292216	0.368975	0.110689	0.501642	0.428646	0.117259	0.0996899	0.977586
VMH-NEURO26	0.318835	2.46431e-09	5.23253e-09	FALSE	0.85593	0.287634	0.12295	0.853475	0.0220184	0.50434	0.966376	0.673791	0.601177	0.415811	0.995537	0.134486	0.165001	0.484628	0.98797	0.050247	0.37332	0.0578815	0.0483166	0.367408	0.969549	0.672606	0.0169548	0.646896	0.884847	0.820889	0.962199	0.157764	0.036032	0.686101	0.272725	0.991442	0.114676	0.21221	0.338686	0.458724	0.454817	0.342806
LHA-NEURO16	0.320168	2.26147e-09	4.84017e-09	FALSE	0.276458	0.0109312	0.409512	0.489837	0.0773104	0.264196	0.81592	0.310261	0.855745	0.322557	0.998315	0.452547	0.243956	0.086749	0.278715	0.604672	0.49897	0.237226	0.48445	0.749992	0.35716	0.479352	0.451231	0.433293	0.078481	0.446989	0.0739284	0.223667	0.422472	0.254499	0.452033	0.971035	0.463597	0.677291	0.350831	0.212384	0.462837	0.816651
POA-NEURO54	0.324823	3.53451e-09	7.7809e-09	FALSE	0.95748	0.101373	0.762383	0.0651605	0.144722	0.280085	0.953014	0.395952	0.612484	0.398729	0.721084	0.0418515	0.0440966	0.434874	0.714976	0.806662	0.225001	0.784644	0.495877	0.46006	0.984007	0.403219	0.348549	0.00912255	0.22121	0.262618	0.154999	0.627697	0.859822	0.0106331	0.565417	0.916794	0.0537132	0.0433912	0.227268	0.620668	0.556913	0.285121
VMH-NEURO18	0.339039	2.2171e-09	5.34129e-09	FALSE	0.862846	0.755799	0.0709948	0.786409	0.231259	0.567055	0.310375	0.252548	0.808213	0.0821297	0.0681402	0.737954	0.820789	0.871059	0.748264	0.180558	0.766105	0.65596	0.583954	0.943126	0.127715	0.374936	0.083893	0.840719	0.480905	0.544234	0.523985	0.183651	0.352741	0.350354	0.0216658	0.206132	0.780118	0.585756	0.729499	0.974159	0.959785	0.933169
POA-NEURO36	0.340151	1.54828e-09	3.7575e-09	FALSE	0.645963	0.145029	0.0234884	0.329612	3.58559e-06	0.0571338	0.492043	0.786208	0.16741	0.0116574	0.536066	1.72183e-11	0.102584	0.949597	0.795115	0.994052	0.263842	0.0333978	1.61228e-07	0.193978	0.786447	0.26266	0.541275	0.0138802	0.171806	0.00116759	0.647903	0.650514	0.0181645	4.78618e-05	0.00380723	0.38648	0.867315	0.861573	0.320536	0.884915	0.988957	0.00133657
ARCME-NEURO13	0.36281	1.70554e-09	4.85969e-09	FALSE	0.303387	0.0232267	0.637006	0.0861152	8.59483e-05	0.401699	0.560689	0.624332	0.840394	0.0133946	0.856216	0.00293114	0.0451571	0.855519	0.523821	0.41684	0.830409	0.00722913	0.0045739	0.236641	0.640946	0.196433	0.13461	0.142292	0.179887	0.213254	0.305105	0.541382	0.744629	0.14499	0.00345631	0.884876	0.335219	0.430082	0.661084	0.958255	0.812031	0.225046
ARCME-OLIGO1	0.38294	1.73427e-09	5.82424e-09	FALSE	0.689472	0.821021	0.58868	0.60976	0.512322	0.955357	0.907977	0.446049	0.311166	0.916082	0.904284	0.153278	0.294419	0.282786	0.700849	0.997759	0.137074	0.258349	0.505989	0.864281	0.0749073	0.95192	0.551107	0.512257	0.822966	0.842935	0.485765	0.0714627	0.354299	0.350176	0.798449	0.892405	0.967774	0.309238	0.574785	0.353815	0.547627	0.378589
VMH-NEURO15	0.3972	1.5753e-09	6.04488e-09	FALSE	0.175733	0.332723	0.185969	0.309004	0.152443	0.137321	0.443715	0.395849	0.378787	0.857956	0.770297	0.183107	0.0377712	0.905401	0.979982	0.365311	0.0713529	0.215377	0.424817	0.213323	0.0617693	0.0476179	0.521627	0.10081	0.493252	0.148668	0.792074	0.99303	0.20041	0.633217	0.544645	0.486386	0.0957882	0.625617	0.146374	0.597311	0.775101	0.0920083
ARCME-NEURO1	0.397437	1.6325e-09	6.27917e-09	FALSE	0.341175	0.828669	0.561238	0.584677	0.0737891	0.234147	0.799114	0.833116	0.0720144	0.578499	0.997638	0.56656	0.697135	0.930641	0.287593	0.976345	0.0374905	0.0344065	0.100934	0.127105	0.170027	0.374971	0.10068	0.885405	0.13328	0.467992	0.29097	0.190589	0.727265	0.700553	0.121652	0.987614	0.576633	0.250528	0.0401017	0.68823	0.923414	0.105795
VMH-NEURO37	0.401859	1.68368e-09	6.77431e-09	FALSE	0.187523	0.0217403	0.0437239	0.619412	0.821173	0.471275	0.209731	0.106027	0.704211	0.600721	0.564067	0.547241	0.328354	0.384566	0.649902	0.52013	0.231003	0.556417	0.426774	0.60812	0.779265	0.195895	0.106063	0.528929	0.842755	0.655134	0.157705	0.781615	0.697275	0.941207	0.383214	0.54546	0.315642	0.647605	0.0360286	0.786713	0.974702	0.905969
VMH-NEURO12	0.410601	1.98373e-09	8.77753e-09	FALSE	0.898042	0.210894	0.577046	0.315159	0.3085	0.300837	0.116362	0.342019	0.564277	0.650812	0.160367	0.029333	0.854461	0.379904	0.155784	0.18912	0.257375	0.766451	0.626173	0.300736	0.292653	0.603255	0.362662	0.292115	0.728366	0.427417	0.582484	0.634177	0.978049	0.792871	0.131129	0.089126	0.244873	0.770591	0.640094	0.708439	0.736197	0.511792
VMH-NEURO1	0.411496	1.52047e-09	6.79694e-09	FALSE	0.165028	0.532862	0.00399283	0.918243	0.281111	0.017569	0.0401229	0.684541	0.649724	0.562974	0.0414159	0.0967814	0.696875	0.360286	0.0587549	0.0560375	0.324555	0.647186	0.307565	0.381013	0.223099	0.307882	0.754649	0.694196	0.672016	0.31019	0.983143	0.937797	0.924288	0.635562	0.29343	0.0358809	0.0103515	0.30108	0.0606321	0.29777	0.368906	0.764784
HYPC-NEURO7	0.425796	1.26829e-09	6.77913e-09	FALSE	0.192865	0.0362734	0.28885	0.690897	0.380871	0.298019	0.109981	0.423645	0.792639	0.368822	0.465336	0.124032	0.117534	0.475033	0.262864	0.027712	0.743639	0.0708259	0.34515	0.0531811	0.743215	0.226995	0.054221	0.105455	0.388025	0.216039	0.939333	0.756049	0.741155	0.348745	0.0359667	0.450029	0.270516	0.160813	0.468125	0.902176	0.585521	0.265463
VMH-NEURO4	0.434568	9.15357e-10	5.55581e-09	FALSE	0.950234	0.400389	0.256818	0.904323	0.0755257	0.141665	0.183165	0.259722	0.28107	0.735083	0.139207	0.0429803	0.109125	0.309766	0.217668	0.665659	0.387996	0.807487	0.240105	0.132325	0.532945	0.252276	0.539077	0.234274	0.673513	0.206581	0.714561	0.923945	0.750869	0.650862	0.0629262	0.16546	0.200082	0.82318	0.7706	0.176237	0.139856	0.0949153
LHA-NEURO21	0.452639	5.75425e-10	4.8356e-09	FALSE	0.16623	0.504258	0.726705	0.653445	0.0263837	0.479492	0.7256	0.721107	0.0747011	0.387591	0.9651	0.0602792	0.332049	0.933531	0.743372	0.916198	0.0132095	0.207116	0.165753	0.0432021	0.25825	0.128235	0.210226	0.596679	0.649078	0.100663	0.0521799	0.0468077	0.351616	0.0121806	0.160917	0.723263	0.03291	0.567021	0.0838294	0.666865	0.847951	0.121099
POA-NEURO14	0.486349	2.157e-10	6.30232e-09	FALSE	0.737081	0.0507017	0.376746	0.155535	0.475034	0.189307	0.556307	0.65206	0.79695	0.461687	0.426979	0.35241	0.213123	0.371734	0.668122	0.434299	0.714412	0.617695	0.193873	0.717814	0.752898	0.216889	0.152545	0.219714	0.206026	0.55748	0.0292705	0.771629	0.500464	0.118931	0.677367	0.612034	0.252918	0.881725	0.572409	0.557788	0.47834	0.440842
VMH-ASTRO1	0.49714	3.33524e-11	4.65286e-09	FALSE	0.117165	0.872772	0.277434	0.87476	0.900864	0.529681	0.562427	0.983797	0.569485	0.927668	0.228561	0.325258	0.195748	0.793965	0.342053	0.0226366	0.656397	0.740568	0.429903	0.0671479	0.216952	0.208677	0.391031	0.670619	0.301969	0.985772	0.677465	0.798111	0.494756	0.34889	0.895148	0.1493	0.399332	0.0791489	0.336562	0.326766	0.0365567	0.933435
HYPR-NEURO19	0.525185	-5.72189e-10	9.05771e-09	FALSE	0.818279	0.0435471	0.0699145	0.119661	0.00926844	0.15494	0.175727	0.625513	0.749034	0.106197	0.161246	0.0455398	0.14026	0.966429	0.136614	0.815614	0.525238	0.0723665	0.0031049	0.972075	0.584225	0.0351611	0.365007	0.183658	0.217185	0.0683962	0.696454	0.729387	0.243409	0.00189326	0.489224	0.318187	0.0336859	0.488584	0.58721	0.650272	0.930475	0.172949
HYPR-NEURO11	0.525891	-4.59576e-10	7.07649e-09	FALSE	0.603012	0.460628	0.00156977	0.19896	0.000618971	0.221961	0.221662	0.631822	0.187169	0.00441836	0.325961	0.106749	0.057441	0.724295	0.558372	0.777551	0.0678206	0.268953	0.00771448	0.392849	0.402941	0.123976	0.826033	0.058974	0.2354	0.00271182	0.325	0.168546	0.422444	0.520999	0.47899	0.148417	0.125371	0.133079	0.303557	0.818566	0.896059	0.00332284
ARCME-OLIGO4	0.542032	-4.73468e-10	4.48552e-09	FALSE	0.444555	0.82125	0.389198	0.36041	0.711785	0.798374	0.97596	0.681473	0.541631	0.890371	0.888502	0.285155	0.303613	0.927903	0.969354	0.975555	0.479136	0.0316616	0.455932	0.795899	0.281425	0.697276	0.538529	0.365217	0.683923	0.767272	0.239891	0.519018	0.951713	0.0612909	0.581709	0.892588	0.976187	0.925201	0.530472	0.843589	0.927248	0.267803
ARCME-NEURO18	0.575444	-1.13157e-09	5.94772e-09	FALSE	0.856469	0.821337	0.242299	0.0852632	0.0394673	0.0487469	0.0516503	0.617247	0.156638	0.419227	0.311557	0.0018109	0.315528	0.538469	0.264364	0.243135	0.27981	0.319824	0.00411706	0.45119	0.744121	0.391954	0.650029	0.349312	0.713449	0.0239001	0.996183	0.941201	0.175726	0.297274	0.0681566	0.273161	0.207341	0.0946721	0.533743	0.464101	0.296889	0.00888257
ARCME-PATU1	0.583662	-1.04062e-09	4.92553e-09	FALSE	0.150643	0.436026	0.825278	0.365548	0.313089	0.623337	0.00581227	0.412124	0.379463	0.955952	0.0133998	0.885796	0.463861	0.497146	0.231995	0.00448121	0.236078	0.88331	0.378909	0.0697003	0.225446	0.189591	0.0708188	0.593804	0.446352	0.803733	0.504775	0.140715	0.689659	0.414844	0.468692	0.0159078	0.564447	0.417964	0.274863	0.494229	0.212896	0.641259
HYPC-NEURO1	0.58556	-1.61591e-09	7.47625e-09	FALSE	0.419085	0.202739	0.0227715	0.279665	0.000977351	0.235897	0.141404	0.598931	0.585696	0.1683	0.0829486	0.00128963	0.29263	0.40682	0.327435	0.75498	0.45281	0.0543808	0.0161988	0.893926	0.328692	0.21935	0.986312	0.010516	0.223617	0.0418401	0.494412	0.914376	0.142748	0.011354	0.423954	0.343937	0.231359	0.894312	0.890516	0.914754	0.984777	0.0180766
ARCME-OLIGO2	0.605809	-1.53554e-09	5.72084e-09	FALSE	0.655386	0.735226	0.608829	0.0825274	0.626906	0.551237	0.992093	0.301236	0.455055	0.95259	0.972419	0.572553	0.563547	0.845104	0.97954	0.995494	0.554836	0.0818222	0.438322	0.778136	0.35765	0.647965	0.389548	0.615147	0.538475	0.977644	0.253847	0.10874	0.868429	0.0403313	0.647545	0.990398	0.75838	0.851104	0.775746	0.798542	0.917552	0.756072
POA-NEURO8	0.60692	-1.57174e-09	5.79336e-09	FALSE	0.74533	0.0231256	0.773863	0.449025	0.4546	0.467725	0.0649773	0.893923	0.999993	0.785637	0.228046	0.930176	0.509888	0.923283	0.256467	0.925759	0.988596	0.36464	0.794488	0.550764	0.754344	0.438226	0.211211	0.469987	0.379379	0.517443	0.585249	0.595722	0.505203	0.989287	0.335261	0.0185743	0.597757	0.597835	0.975009	0.628032	0.237085	0.692328
VMH-NEURO11	0.621227	-2.9783e-09	9.64773e-09	FALSE	0.536216	0.745889	0.145739	0.88346	0.496757	0.354584	0.348553	0.220291	0.752071	0.29179	0.528215	0.0891738	0.745057	0.889584	0.0239393	0.161345	0.260733	0.75586	0.540371	0.129165	0.100107	0.452673	0.809122	0.191387	0.302059	0.372677	0.156559	0.93123	0.629119	0.737427	0.370666	0.285721	0.100047	0.935547	0.366477	0.8402	0.681829	0.260125
HYPR-NEURO32	0.629733	-3.15589e-09	9.53021e-09	FALSE	0.754751	0.0685312	0.0297623	0.633279	0.503239	0.0936791	0.266287	0.632813	0.205043	0.1837	0.612655	0.308567	0.0662514	0.0721748	0.754043	0.622225	0.285403	0.377973	0.0993997	0.267805	0.572739	0.114484	0.919342	0.960732	0.335925	0.197482	0.426416	0.75737	0.348514	0.572061	0.836693	0.780618	0.857988	0.558432	0.407703	0.172095	0.0834132	0.12067
ARCME-MICRO1	0.656397	-2.39606e-09	5.95071e-09	FALSE	0.029864	0.427182	0.056493	0.169884	0.592676	0.57038	0.0648606	0.0115452	5.50581e-05	0.968489	0.179401	0.761872	0.848493	0.947648	0.721956	0.892916	0.000139278	0.927092	0.47069	0.0288962	0.0049346	0.246914	0.00014369	0.983954	0.00137259	0.997202	0.00182132	0.0115731	0.997836	0.752428	0.597493	0.359344	0.00157588	0.456972	0.00184871	0.754077	0.340669	0.990231
ARCME-ASTRO1	0.657966	-1.91846e-09	4.71459e-09	FALSE	0.10686	0.957283	0.654475	0.69291	0.586838	0.749416	0.920138	0.819171	0.252419	0.996016	0.901605	0.889099	0.861928	0.904544	0.678248	0.198556	0.26071	0.202343	0.803504	0.17002	0.204234	0.630523	0.894319	0.6696	0.0368526	0.810955	0.332653	0.973209	0.433514	0.471886	0.485727	0.643344	0.283946	0.50063	0.0842133	0.4089	0.232157	0.422563
HYPC-NEURO34	0.661707	-2.77434e-09	6.65108e-09	FALSE	0.869327	0.89637	0.230992	0.317519	0.355968	0.231925	0.866328	0.69874	0.177637	0.580233	0.997666	0.841839	0.237447	0.137666	0.12201	0.993351	0.0774391	0.00209349	0.580171	0.518285	0.353294	0.234032	0.166733	0.850703	0.181341	0.248198	0.251958	0.238064	0.607698	0.734792	0.0770952	0.987465	0.485387	0.792881	0.077845	0.125797	0.138305	0.298647
POA-NEURO50	0.676564	-2.6257e-09	5.73157e-09	FALSE	0.257212	0.416701	0.299827	0.632903	0.116091	0.770357	0.207828	0.613752	0.990331	0.229357	0.0737377	0.193598	0.791239	0.72586	0.0875532	0.497723	0.869667	0.379889	0.274678	0.94732	0.700209	0.761311	0.385436	0.19426	0.626791	0.433906	0.686026	0.585325	0.250184	0.225918	0.279599	0.32869	0.760717	0.10131	0.796021	0.981136	0.997689	0.348586
ARCME-OLIGO5	0.682906	-3.07693e-09	6.46632e-09	FALSE	0.734495	0.782581	0.375809	0.602911	0.415437	0.838716	0.98104	0.258781	0.632454	0.995263	0.917161	0.951491	0.880667	0.778279	0.936655	0.999938	0.258739	0.107918	0.495936	0.785707	0.454877	0.969783	0.743734	0.827745	0.573997	0.89642	0.737597	0.286713	0.671916	0.315095	0.903775	0.90319	0.927087	0.458793	0.544295	0.437099	0.470951	0.327017
ARCME-NG22	0.696359	-2.0263e-09	3.94255e-09	FALSE	0.264381	0.961577	0.586073	0.696062	0.660645	0.903656	0.399035	0.113886	0.912809	0.991878	0.622509	0.711465	0.755679	0.205845	0.602164	0.199145	0.559715	0.878034	0.9193	0.739881	0.296022	0.170242	0.981178	0.474066	0.250153	0.348029	0.773781	0.549744	0.324304	0.282998	0.990522	0.698935	0.23487	0.245523	0.75502	0.633416	0.496812	0.333974
ARCME-OLIGO3	0.69847	-2.50986e-09	4.82661e-09	FALSE	0.285187	0.936878	0.385963	0.495308	0.624315	0.634058	0.861211	0.540494	0.209208	0.925573	0.931492	0.416778	0.573647	0.771281	0.957071	0.984344	0.256173	0.0322706	0.897967	0.333894	0.158368	0.426428	0.775766	0.260761	0.894086	0.390938	0.370763	0.121211	0.74682	0.0179263	0.692115	0.834611	0.867171	0.671769	0.729983	0.657639	0.796041	0.117562
HYPR-NEURO33	0.699324	-6.11723e-09	1.17086e-08	FALSE	0.693944	0.250732	0.279781	0.825986	0.199604	0.28374	0.522591	0.778041	0.0579709	0.100322	0.943848	0.348561	0.0844684	0.0254596	0.919149	0.62156	0.0345042	0.184758	0.25191	0.161451	0.817163	0.124896	0.543463	0.532018	0.199158	0.00622452	0.602231	0.24583	0.199606	0.386731	0.617765	0.745096	0.203237	0.27123	0.0879207	0.200497	0.194444	0.016937
HYPR-NEURO17	0.715274	-4.76073e-09	8.36893e-09	FALSE	0.791914	0.00924598	0.885552	0.441786	0.790168	0.863916	0.191866	0.556929	0.566299	0.466845	0.237941	0.151428	0.370607	0.565578	0.823702	0.0411741	0.803524	0.0498418	0.359035	0.160263	0.34574	0.706747	0.205876	0.397753	0.485443	0.584765	0.892902	0.507165	0.914139	0.216062	0.203741	0.307509	0.710402	0.673165	0.893431	0.451684	0.109256	0.735189
ARCME-FIBRO1	0.74937	-5.95937e-09	8.86139e-09	FALSE	0.149492	0.909324	0.946982	0.239391	0.996438	0.0859102	0.522794	0.137182	0.0216732	0.913854	0.251173	0.999503	0.990348	0.97335	0.907701	0.0903368	0.00786954	0.977028	0.973123	0.106735	0.282476	0.146211	0.00185147	0.933908	0.00273671	0.952282	0.0227571	0.0944996	0.97008	0.98339	0.137199	0.296891	0.0327891	0.86314	0.0686376	0.133031	0.0116774	0.996415
VMH-NEURO38	0.752476	-3.61074e-09	5.292e-09	FALSE	0.313956	0.119321	0.420395	0.611419	0.938499	0.771549	0.124557	0.62347	0.788982	0.538314	0.369517	0.597063	0.225848	0.0812173	0.332625	0.215898	0.248913	0.597849	0.756679	0.0150618	0.508198	0.0231615	0.0702543	0.862396	0.638932	0.534822	0.114959	0.98004	0.951121	0.931677	0.400141	0.244215	0.538249	0.346031	0.0480815	0.719686	0.621505	0.939889
POA-NEURO60	0.756064	-3.36998e-09	4.85799e-09	FALSE	0.372714	0.566926	0.0369165	0.209285	0.0187476	0.609531	0.254874	0.0206136	0.0832215	0.13515	0.560815	0.00326622	0.160179	0.763134	0.367718	0.580212	0.130663	0.914213	0.0181929	0.276345	0.80094	0.464894	0.5517	0.71852	0.0930758	0.112081	0.147705	0.465514	0.806427	0.0135974	0.143745	0.494532	0.0453906	0.754407	0.387288	0.95189	0.97729	0.114612
HYPC-OPC1	0.760012	-3.25056e-09	4.60197e-09	FALSE	0.176818	0.914358	0.317902	0.401623	0.813106	0.811189	0.612582	0.0309129	0.699531	0.936793	0.597895	0.937634	0.976615	0.107762	0.36784	0.117493	0.237812	0.938509	0.899568	0.421638	0.289323	0.0745512	0.873592	0.45078	0.0956622	0.487807	0.893471	0.613563	0.121596	0.328994	0.954926	0.686906	0.766871	0.217944	0.26976	0.0591695	0.015347	0.586519
HYPC-NEURO21	0.760966	-4.73161e-09	6.66975e-09	FALSE	0.640018	0.147137	0.397912	0.0960662	0.0288341	0.167222	0.259543	0.720052	0.715905	0.11707	0.39903	0.00389537	0.0761796	0.740043	0.0492843	0.0651269	0.358566	0.182288	0.0201618	0.504281	0.854877	0.319426	0.806046	0.142513	0.402101	0.075301	0.951898	0.34647	0.704227	0.567714	0.131832	0.335094	0.456981	0.72948	0.270328	0.791937	0.704504	0.237031
LHA-OTHER1	0.779096	-4.74488e-09	6.16905e-09	FALSE	0.37667	0.96389	0.586502	0.456444	0.950606	0.422301	0.641543	0.313584	0.603634	0.993796	0.251703	0.934589	0.401586	0.410873	0.662273	0.434561	0.362372	0.677683	0.99155	0.40832	0.448365	0.901459	0.609733	0.922936	0.169807	0.994977	0.470489	0.265296	0.941913	0.158561	0.759467	0.145537	0.813706	0.371512	0.27115	0.494552	0.21861	0.80587
LHA-OLIGO1	0.806428	-3.90463e-09	4.51502e-09	FALSE	0.374827	0.953065	0.336094	0.675268	0.885503	0.918582	0.942515	0.629671	0.411187	0.97843	0.931059	0.481427	0.636603	0.881615	0.969916	0.507201	0.417858	0.0543173	0.770052	0.693061	0.433622	0.828837	0.67476	0.692648	0.541562	0.981341	0.323843	0.683317	0.986357	0.159857	0.866484	0.857279	0.86771	0.77241	0.554341	0.732647	0.499899	0.872818
POA-OLIGO5	0.809243	-3.99757e-09	4.56808e-09	FALSE	0.108715	0.972681	0.541692	0.709626	0.85769	0.925	0.996589	0.491328	0.143381	0.978936	0.978127	0.721979	0.385182	0.491024	0.743342	0.928235	0.321656	0.0158251	0.890211	0.422559	0.453544	0.103369	0.752886	0.701442	0.692889	0.841231	0.204267	0.39038	0.932931	0.245419	0.675509	0.897403	0.856929	0.870516	0.622068	0.667823	0.404787	0.646309
POA-MICRO2	0.817897	-5.8658e-09	6.46454e-09	FALSE	0.0670812	0.633836	0.0894183	0.511425	0.89394	0.492242	0.151315	0.0200082	0.000190095	0.95258	0.126718	0.998613	0.964923	0.912184	0.505292	0.960922	3.99059e-05	0.917583	0.939385	0.193374	0.237605	0.199353	0.0034034	0.986895	0.000277615	0.983415	0.0257554	0.0596014	0.99928	0.928694	0.952097	0.143767	0.0121457	0.792041	0.000729918	0.805343	0.420199	0.99092
ARCME-OLIGO6	0.818393	-4.44347e-09	4.88692e-09	FALSE	0.478175	0.679388	0.545351	0.442045	0.336371	0.601346	0.698473	0.518527	0.419341	0.940531	0.595888	0.470616	0.693337	0.247551	0.555992	0.935344	0.32655	0.527434	0.498577	0.382797	0.333835	0.787674	0.870325	0.887916	0.819453	0.935129	0.755207	0.41612	0.437175	0.032259	0.696645	0.499713	0.530908	0.264065	0.778564	0.182998	0.128381	0.532471
LHA-ASTRO1	0.820309	-4.23018e-09	4.61535e-09	FALSE	0.0893561	0.815582	0.376124	0.753566	0.976272	0.598356	0.689141	0.440513	0.50775	0.975667	0.504611	0.371418	0.434699	0.93287	0.159101	0.148404	0.588859	0.75072	0.866444	0.0365703	0.229119	0.393585	0.514303	0.532828	0.0948483	0.822612	0.732809	0.821299	0.819906	0.583373	0.853439	0.462095	0.139904	0.0860306	0.108322	0.0924635	0.00756726	0.747566
LHA-RBC1	0.820715	-1.03705e-08	1.12957e-08	FALSE	0.182636	0.65943	0.92901	0.546075	0.0180331	0.719408	0.223987	0.511303	0.659533	0.929038	0.42136	0.999636	0.482468	0.45706	0.0954613	0.38306	0.461739	0.159234	0.830114	0.0353472	0.233898	0.0604888	0.28468	0.982081	0.113785	0.90254	0.827497	0.675061	0.970274	0.957327	0.960904	0.545214	0.252256	0.463917	0.584632	0.398139	0.404745	0.872394
VMH-OLIGO1	0.826829	-5.65709e-09	6.00727e-09	FALSE	0.150729	0.867982	0.538413	0.568938	0.86061	0.741433	0.973902	0.76001	0.211212	0.833677	0.529162	0.763802	0.434335	0.61049	0.291908	0.870223	0.363127	0.0899635	0.886205	0.48713	0.442836	0.873129	0.658764	0.777984	0.734612	0.629381	0.59968	0.244901	0.961275	0.45194	0.653086	0.67086	0.948243	0.949501	0.444303	0.896028	0.848468	0.428044
HYPC-OLIGO1	0.831867	-5.27793e-09	5.48887e-09	FALSE	0.886882	0.681439	0.404265	0.382562	0.854541	0.990799	0.879091	0.203515	0.596339	0.993621	0.680704	0.93339	0.451875	0.194644	0.726749	0.834853	0.399752	0.876507	0.916351	0.631697	0.551678	0.779668	0.653301	0.993364	0.69619	0.996272	0.95691	0.319828	0.319011	0.259804	0.746624	0.6012	0.958544	0.205981	0.44261	0.286244	0.165491	0.870739
LHA-MICRO1	0.836734	-5.5654e-09	5.67249e-09	FALSE	0.0120566	0.219524	0.126066	0.33673	0.973525	0.263246	0.240719	0.0223085	0.00167859	0.986966	0.45052	0.985	0.42416	0.759962	0.587957	0.690874	0.0415563	0.918935	0.899989	0.0516646	0.152783	0.0604583	0.0001388	0.99672	0.00360057	0.994376	0.0458782	0.0148399	0.998638	0.863024	0.878023	0.489613	0.100523	0.175523	0.0523598	0.360249	0.139611	0.987841
VMH-NEURO33	0.838629	-4.76297e-09	4.81673e-09	FALSE	0.909161	0.394854	0.11227	0.873781	0.823467	0.103338	0.187532	0.213532	0.841884	0.657343	0.459805	0.606413	0.2297	0.194517	0.20299	0.0177139	0.321742	0.452612	0.991732	0.115632	0.207939	0.0341326	0.554151	0.925655	0.145832	0.98223	0.65754	0.881818	0.433706	0.998028	0.620431	0.570244	0.263369	0.117788	0.102867	0.873179	0.652775	0.997743
VMH-MICRO1	0.847676	-5.08345e-09	4.95214e-09	FALSE	0.0434422	0.781348	0.0828711	0.287669	0.997641	0.635872	0.154289	0.0178206	8.15782e-05	0.997755	0.395783	0.995587	0.659828	0.864161	0.215158	0.517856	0.000358054	0.941376	0.945149	0.0324353	0.0222753	0.224967	0.00212488	0.977145	0.000197137	0.999048	0.0248446	0.0313091	0.998967	0.775707	0.759878	0.198743	0.0118559	0.234791	0.00698938	0.94926	0.465678	0.99613
HYPC-ASTRO1	0.86108	-6.29013e-09	5.79638e-09	FALSE	0.0834903	0.750398	0.801477	0.745927	0.909588	0.596281	0.886173	0.429	0.637655	0.958766	0.538453	0.997382	0.841075	0.943058	0.704706	0.0597305	0.761176	0.357513	0.874549	0.103241	0.430119	0.44506	0.698875	0.736626	0.0275748	0.890054	0.213209	0.756338	0.699527	0.697491	0.474791	0.529707	0.21472	0.442966	0.637216	0.179974	0.0149956	0.964527
POA-OLIGO7	0.875861	-5.06461e-09	4.38669e-09	FALSE	0.0654689	0.92223	0.792367	0.685602	0.841371	0.905112	0.913749	0.702752	0.6113	0.994895	0.874232	0.346924	0.705439	0.292844	0.32987	0.886084	0.661363	0.00485556	0.568514	0.395188	0.48559	0.131586	0.842369	0.689403	0.516415	0.978088	0.135633	0.255359	0.971526	0.327779	0.400118	0.864126	0.982951	0.932696	0.556447	0.547445	0.349454	0.948358
ARCME-PATU2	0.885941	-8.26436e-09	6.85714e-09	FALSE	0.126715	0.949989	0.904629	0.833234	0.350263	0.616348	0.517811	0.416215	0.830005	0.96049	0.198317	0.991759	0.968946	0.745231	0.570563	0.0946396	0.336343	0.505551	0.993503	0.857027	0.575326	0.944716	0.500751	0.995056	0.819432	0.999827	0.940814	0.309758	0.876309	0.995298	0.755173	0.186465	0.129474	0.224071	0.292734	0.861544	0.704325	0.999992
VMH-NEURO31	0.906473	-7.67271e-09	5.81554e-09	FALSE	0.906935	0.313477	0.162193	0.377511	0.0350419	0.158712	0.393609	0.697764	0.580716	0.587352	0.407729	0.074655	0.513397	0.370956	0.959255	0.790028	0.958599	0.391643	0.103567	0.976774	0.985015	0.872447	0.63788	0.693453	0.831101	0.17665	0.960122	0.999896	0.83013	0.0716306	0.440018	0.177142	0.66721	0.997606	0.966988	0.967067	0.948634	0.111887
POA-ASTRO1	0.911189	-5.55727e-09	4.12227e-09	FALSE	0.14151	0.996673	0.531985	0.89726	0.947552	0.807242	0.629936	0.91461	0.731108	0.991889	0.248597	0.926396	0.522338	0.858985	0.427478	0.299881	0.862887	0.913156	0.870086	0.033595	0.176278	0.496223	0.684956	0.826645	0.296215	0.91842	0.565668	0.9541	0.516725	0.857826	0.966587	0.285802	0.421394	0.183755	0.371165	0.585434	0.292252	0.596942
ARCME-TANY6	0.913628	-6.07457e-09	4.45533e-09	FALSE	0.18801	0.578833	0.39759	0.754084	0.999882	0.864793	0.561395	0.371894	0.629533	0.977602	0.790111	0.861461	0.981297	0.812561	0.545483	0.528734	0.385283	0.910826	0.82696	0.131923	0.0509077	0.407131	0.191917	0.779501	0.453056	0.754731	0.613956	0.480662	0.575891	0.936691	0.613207	0.449904	0.424701	0.602049	0.234744	0.938914	0.812835	0.909347
POA-ASTRO2	0.915183	-6.1685e-09	4.49148e-09	FALSE	0.137124	0.978746	0.851572	0.982308	0.968058	0.913007	0.424153	0.979822	0.828535	0.984553	0.359864	0.989127	0.18618	0.875857	0.357781	0.367528	0.813299	0.584571	0.965654	0.010055	0.377518	0.112366	0.519156	0.922357	0.501295	0.877975	0.804317	0.848904	0.666103	0.643153	0.953049	0.267957	0.169654	0.138383	0.35701	0.328379	0.108778	0.912831
LHA-OTHER2	0.916223	-9.32194e-09	6.7545e-09	FALSE	0.557725	0.411786	0.897785	0.613549	0.838285	0.483122	0.169001	0.432985	0.209244	0.430265	0.0178173	0.827156	0.0550684	0.531651	0.779973	0.00339153	0.0399498	0.180012	0.561383	0.0906748	0.191565	0.0176926	0.390247	0.919518	0.954428	0.372274	0.823987	0.630492	0.522996	0.305875	0.579857	0.0407299	0.160692	0.940165	0.0855533	0.17297	0.0123856	0.697446
POA-OLIGO4	0.916964	-5.74776e-09	4.15021e-09	FALSE	0.628202	0.996805	0.607771	0.605906	0.98435	0.848371	0.985996	0.685426	0.386137	0.989665	0.793405	0.888464	0.588009	0.85217	0.473477	0.973989	0.42736	0.537516	0.982436	0.684724	0.294225	0.22685	0.415964	0.877786	0.762586	0.986342	0.204302	0.606097	0.988178	0.696108	0.945802	0.885595	0.759786	0.901406	0.547295	0.781663	0.551359	0.799441
ARCME-PVM1	0.91847	-9.25562e-09	6.63554e-09	FALSE	0.0637334	0.314434	0.394239	0.410657	0.271917	0.230291	0.386165	0.0179963	0.00105662	0.951257	0.309606	0.693576	0.54031	0.889691	0.590308	0.942864	0.000233371	0.667682	0.518726	0.0237962	0.0525754	0.399281	0.00059853	0.914135	5.11329e-05	0.868752	0.0102426	0.00226793	0.954965	0.860797	0.383101	0.572419	0.00342269	0.442912	0.000584757	0.817298	0.495952	0.962721
POA-EPENDY1	0.928078	-6.62608e-09	4.53337e-09	FALSE	0.105246	0.940939	0.699007	0.992178	0.91163	0.147612	0.624796	0.736578	0.635404	0.996671	0.953749	0.995263	0.673254	0.71257	0.408207	0.0496563	0.456634	0.860432	0.986385	0.140492	0.0336628	0.783178	0.0725585	0.985739	0.126454	0.844217	0.23315	0.722285	0.929801	0.921707	0.793538	0.608888	0.0534953	0.342008	0.438176	0.776535	0.369553	0.962704
LHA-MACRO1	0.928988	-7.96285e-09	5.42319e-09	FALSE	0.0515323	0.217459	0.208674	0.1164	0.506208	0.250711	0.0565138	0.0537885	0.0117135	0.9876	0.355897	0.961432	0.691274	0.936249	0.196302	0.856963	0.0969493	0.70108	0.927152	0.137764	0.0596477	0.0255208	3.21954e-05	0.895802	5.05201e-05	0.937732	0.178482	0.0213073	0.981681	0.986173	0.844664	0.490342	0.112137	0.400482	0.287438	0.143525	0.0338906	0.991634
ARCME-TANY5	0.931687	-6.03448e-09	4.05413e-09	FALSE	0.145935	0.504178	0.37255	0.897561	0.996213	0.699098	0.506213	0.301525	0.74505	0.983224	0.75109	0.956214	0.971188	0.740327	0.566287	0.176842	0.624768	0.847669	0.908082	0.0745761	0.186201	0.24632	0.204643	0.828821	0.386607	0.974174	0.416692	0.617353	0.857588	0.990206	0.744193	0.445107	0.594018	0.76784	0.221733	0.685431	0.515129	0.998398
POA-OLIGO8	0.932086	-9.61463e-09	6.44625e-09	FALSE	0.130558	0.987835	0.548198	0.252844	0.714173	0.815495	0.770335	0.520301	0.449326	0.842631	0.777266	0.786687	0.344527	0.854603	0.970088	0.978533	0.281914	0.273619	0.866516	0.739429	0.238158	0.764814	0.725542	0.565664	0.266318	0.80308	0.270783	0.54339	0.943862	0.434594	0.698338	0.517979	0.740549	0.689385	0.423422	0.696696	0.584379	0.557272
POA-OLIGO6	0.938265	-6.00514e-09	3.89851e-09	FALSE	0.120477	0.984304	0.900041	0.366337	0.923623	0.794888	0.873389	0.789439	0.737725	0.995158	0.930358	0.616212	0.756221	0.849134	0.693284	0.909248	0.757043	0.10272	0.783861	0.417752	0.106577	0.0441153	0.614523	0.752512	0.598588	0.992526	0.29556	0.585803	0.966807	0.313183	0.804926	0.759865	0.989048	0.966319	0.852301	0.806469	0.574237	0.908989
LHA-OPC1	0.940875	-6.82471e-09	4.36877e-09	FALSE	0.961879	0.511452	0.356459	0.631472	0.862738	0.915969	0.706877	0.344977	0.462234	0.972222	0.540154	0.333495	0.495152	0.264643	0.660522	0.840176	0.213321	0.459134	0.704747	0.359766	0.504677	0.921258	0.836729	0.935189	0.856284	0.958321	0.509746	0.482921	0.560396	0.56237	0.749503	0.505672	0.874436	0.370528	0.522895	0.330794	0.229081	0.781927
HYPC-MO1	0.943636	-8.19585e-09	5.16746e-09	FALSE	0.339446	0.998352	0.242031	0.465846	0.951107	0.85835	0.920647	0.547444	0.591514	0.94751	0.907608	0.868775	0.574333	0.83333	0.96995	0.972367	0.671399	0.0570659	0.692526	0.970866	0.488045	0.884171	0.791992	0.853614	0.519372	0.93987	0.551598	0.454831	0.980029	0.263028	0.783518	0.862271	0.99363	0.754375	0.863606	0.723301	0.598127	0.505709
POA-OLIGO3	0.943742	-6.93992e-09	4.37302e-09	FALSE	0.0486316	0.942099	0.528046	0.696033	0.922448	0.650368	0.978745	0.649538	0.601447	0.982742	0.905209	0.871731	0.49674	0.755833	0.956786	0.974201	0.72314	0.145931	0.958001	0.384343	0.247239	0.0957683	0.842757	0.817832	0.599999	0.977215	0.320809	0.38466	0.978709	0.315957	0.86327	0.730846	0.931887	0.932549	0.85484	0.777076	0.505353	0.886928
POA-OPC1	0.956636	-5.89936e-09	3.44405e-09	FALSE	0.165224	0.838633	0.845069	0.873094	0.90999	0.781945	0.597736	0.189988	0.623321	0.998535	0.732471	0.976281	0.47635	0.0940008	0.632399	0.0464735	0.394772	0.942818	0.992835	0.169056	0.10016	0.0780841	0.996143	0.320504	0.1847	0.697459	0.943945	0.858727	0.611534	0.443471	0.972469	0.739574	0.295897	0.128151	0.745795	0.2385	0.0369606	0.864203
POA-OPC2	0.956767	-7.19287e-09	4.19571e-09	FALSE	0.780317	0.676168	0.596088	0.98057	0.445824	0.859207	0.266584	0.548682	0.879891	0.99987	0.154274	0.881123	0.506489	0.151865	0.330436	0.0383784	0.927538	0.915214	0.986669	0.649916	0.179433	0.281955	0.853988	0.653642	0.0504624	0.849127	0.449641	0.382379	0.947596	0.564855	0.974551	0.258888	0.11835	0.0668779	0.834472	0.213995	0.0066541	0.759964
ARCME-TANY4	0.958104	-7.23012e-09	4.18145e-09	FALSE	0.0950414	0.649957	0.672269	0.910847	0.995215	0.501522	0.789288	0.155198	0.937788	0.987967	0.733057	0.603669	0.891286	0.400454	0.127669	0.302104	0.423161	0.769237	0.967641	0.363666	0.0329818	0.820346	0.0840305	0.97136	0.55766	0.911507	0.284367	0.784936	0.70966	0.972327	0.39041	0.656919	0.837592	0.659016	0.121919	0.596318	0.431847	0.987582
VMH-PVM1	0.960507	-8.82971e-09	5.02657e-09	FALSE	0.104449	0.630295	0.592215	0.972039	0.98264	0.772669	0.472234	0.00791178	0.00113795	0.968046	0.270271	0.999221	0.7021	0.403247	0.403385	0.476374	0.0037655	0.989425	0.998654	0.0781318	0.468934	0.686193	0.0175001	0.999565	0.0175692	0.981444	0.453373	0.183291	0.994008	0.99766	0.688957	0.2358	0.0256001	0.592017	0.00931097	0.936523	0.52759	0.996341
LHA-MURAL1	0.96095	-1.0277e-08	5.83316e-09	FALSE	0.23881	0.998929	0.601763	0.969662	0.992371	0.274359	0.0865435	0.0418312	0.277654	0.995814	0.000562649	0.97867	0.674086	0.175501	0.978909	0.0149835	0.232618	0.686993	0.997951	0.378273	0.811197	0.251584	0.184898	1	0.904465	0.994952	0.895101	0.908309	0.995783	0.999766	0.999456	0.00340344	0.710228	0.963734	0.420222	0.424779	0.012929	0.999895
VMH-OLIGO2	0.96876	-9.23679e-09	4.95837e-09	FALSE	0.0911697	0.584831	0.057023	0.602005	0.842509	0.742592	0.694809	0.458347	0.332708	0.981187	0.148679	0.827144	0.6471	0.139517	0.385271	0.568071	0.189781	0.451951	0.831462	0.41276	0.162188	0.580757	0.621136	0.939712	0.221395	0.955977	0.67342	0.138516	0.881517	0.226289	0.812213	0.244873	0.424611	0.499341	0.348947	0.523508	0.086825	0.948334
POA-MURAL1	0.970332	-8.55459e-09	4.53659e-09	FALSE	0.305116	0.999164	0.578335	0.743091	0.998963	0.500963	0.0868131	0.0871569	0.523113	0.999993	0.0002323	0.98821	0.540239	0.371885	0.796289	0.0172115	0.103659	0.928164	0.999856	0.487949	0.514745	0.561969	0.516625	0.997666	0.910492	0.999038	0.951503	0.828811	0.981993	0.998985	0.984546	0.00694911	0.527012	0.995009	0.118166	0.849979	0.112667	0.999982
POA-MACRO1	0.974289	-1.38533e-08	7.11182e-09	FALSE	0.0403962	0.770823	0.0929079	0.357458	0.943895	0.285057	0.5055	0.0289054	0.00238197	0.998502	0.352899	0.996982	0.892454	0.959862	0.626105	0.961132	0.0029012	0.879851	0.935066	0.0914069	0.0484007	0.300792	0.00014085	0.983225	0.000924632	0.99906	0.0592204	0.00947158	0.998519	0.99393	0.687974	0.610235	0.020869	0.998433	0.00304984	0.984523	0.498394	0.999942
VMH-NEURO17	0.974789	-1.05955e-08	5.41588e-09	FALSE	0.180755	0.204613	0.698253	0.262344	0.585003	0.840846	0.169642	0.923475	0.249828	0.45614	0.0531184	0.510987	0.984716	0.467286	0.346447	0.712376	0.145978	0.20192	0.981103	0.547989	0.916869	0.297166	0.0389699	0.447439	0.90468	0.187201	0.118858	0.708997	0.55214	0.9739	0.552747	0.102984	0.0868537	0.44652	0.219014	0.356671	0.192677	0.656575
ARCME-FIBRO2	0.975606	-1.50251e-08	7.62522e-09	FALSE	0.918796	0.992497	0.760311	0.455423	0.999998	0.333479	0.680032	0.346988	0.608256	0.99753	0.123574	0.999799	0.780507	0.334698	0.465422	0.000316446	0.374625	0.784172	0.997689	0.328578	0.261375	0.148264	0.4956	0.999125	0.378582	0.998016	0.647252	0.238025	0.997183	0.998704	0.927612	0.163199	0.046123	0.844432	0.168013	0.096409	0.00347877	0.999974
LHA-ASTRO2	0.978145	-1.19487e-08	5.9244e-09	FALSE	0.152312	0.957052	0.868754	0.662314	0.989487	0.213009	0.944915	0.516615	0.525713	0.789955	0.551845	0.825819	0.852203	0.964059	0.486321	0.150951	0.843042	0.67248	0.945517	0.128595	0.661315	0.27303	0.956744	0.994849	0.694293	0.993927	0.537681	0.769934	0.858335	0.997455	0.751082	0.840394	0.833327	0.552009	0.391069	0.416508	0.0585476	0.999615
HYPC-TANY1	0.981718	-9.82419e-09	4.69924e-09	FALSE	0.171653	0.851491	0.234889	0.935907	0.996463	0.840762	0.435713	0.171046	0.608057	0.98419	0.318749	0.999574	0.961313	0.6259	0.546382	0.0655524	0.147534	0.943256	0.999373	0.0242805	0.516111	0.0783785	0.0610228	0.986432	0.246073	0.949006	0.174446	0.507068	0.870804	0.997532	0.995857	0.387595	0.668945	0.822644	0.0137736	0.700391	0.323589	0.99864
ARCME-TANY3	0.981869	-1.03331e-08	4.93464e-09	FALSE	0.251033	0.811082	0.752904	0.183662	0.740407	0.7513	0.484131	0.782714	0.173309	0.803778	0.587266	0.804204	0.728448	0.163976	0.650407	0.428088	0.0223848	0.527926	0.477443	0.0749018	0.0413399	0.167603	0.0353805	0.940564	0.273304	0.635724	0.19066	0.747928	0.577442	0.278761	0.36093	0.563719	0.107723	0.705259	0.0138298	0.432547	0.201179	0.907005
HYPR-ASTRO1	0.983265	-1.21646e-08	5.72073e-09	FALSE	0.109854	0.961738	0.755372	0.609348	0.906564	0.865322	0.697741	0.372468	0.188986	0.990191	0.24979	0.939024	0.863844	0.555469	0.88045	0.0877911	0.159508	0.616913	0.990227	0.0436542	0.25412	0.443356	0.649423	0.970858	0.224997	0.99455	0.460373	0.494876	0.99019	0.671745	0.943591	0.502086	0.901576	0.580487	0.0385801	0.600774	0.115521	0.987201
HYPC-EPENDY1	0.984825	-1.05365e-08	4.86561e-09	FALSE	0.311792	0.243246	0.213081	0.929607	0.976622	0.82292	0.33595	0.216217	0.684633	0.999525	0.276593	0.737936	0.79425	0.404246	0.902195	0.755693	0.299729	0.681371	0.999532	0.206444	0.37115	0.528947	0.100208	0.985413	0.415045	0.999971	0.329051	0.116509	0.88204	0.851539	0.384382	0.388618	0.861489	0.933948	0.066387	0.99603	0.877953	0.999917
POA-OLIGO9	0.985758	-8.29928e-09	3.78865e-09	FALSE	0.926718	0.855086	0.375783	0.255574	0.800445	0.965889	0.825825	0.616533	0.460644	0.996745	0.679134	0.688314	0.595089	0.190819	0.61268	0.546084	0.415458	0.822771	0.834251	0.749326	0.444302	0.913926	0.889129	0.994586	0.925121	0.999709	0.663462	0.226013	0.668337	0.308423	0.825209	0.734874	0.835707	0.403379	0.819984	0.207682	0.0538063	0.931031
HYPC-MICRO1	0.986461	-1.29545e-08	5.86071e-09	FALSE	0.0634269	0.8985	0.490604	0.937774	0.850731	0.443951	0.520773	0.114584	0.00376547	0.818934	0.738803	0.983692	0.965656	0.959941	0.61513	0.960408	0.0042252	0.354414	0.855276	0.966373	0.146512	0.883887	0.00315495	0.999797	0.00136361	0.999999	0.00168994	0.00340715	0.999698	0.998487	0.331467	0.703647	0.13515	0.994821	0.0735838	0.963898	0.817232	0.999981
POA-MICRO1	0.986518	-1.11227e-08	5.02825e-09	FALSE	0.0713282	0.795879	0.189683	0.458554	0.987458	0.634994	0.220966	0.00314209	7.93914e-06	0.978644	0.564569	0.999833	0.739118	0.846949	0.841037	0.993997	5.60959e-08	0.966112	0.941033	0.0259118	0.122471	0.059379	2.86055e-05	0.988191	2.65835e-05	0.999319	0.000814927	4.30981e-05	0.999966	0.943879	0.977352	0.797961	0.0044458	0.714915	0.00026927	0.930091	0.471011	0.999995
VMH-NEURO39	0.986866	-1.20796e-08	5.43581e-09	FALSE	0.421429	0.184274	0.136634	0.226009	0.166828	0.308944	0.132943	0.627853	0.417105	0.88792	0.11822	0.191136	0.864341	0.997166	0.957926	0.126479	0.346561	0.24497	0.0513722	0.268107	0.537461	0.853813	0.085529	0.942052	0.599501	0.199205	0.316745	0.552304	0.842088	0.0966202	0.243077	0.177245	0.454207	0.708934	0.139664	0.955297	0.978947	0.217515
ARCME-PATU3	0.987575	-9.52783e-09	4.24645e-09	FALSE	0.125452	0.800575	0.619994	0.83174	0.942058	0.762461	0.440928	0.595407	0.5596	0.998456	0.207113	0.996665	0.772121	0.31024	0.234471	0.0535893	0.270675	0.911415	0.994246	0.0949005	0.23111	0.173517	0.346412	0.99694	0.707325	0.999632	0.616219	0.435989	0.920304	0.99982	0.909443	0.419371	0.583513	0.547878	0.162572	0.865109	0.492358	0.999982
HYPC-MACRO1	0.99529	-1.78634e-08	6.87998e-09	FALSE	0.0926384	0.958169	0.518889	0.723063	0.99663	0.234806	0.0359332	0.117834	0.196883	0.997912	0.0110843	0.999998	0.916393	0.0542065	0.890411	0.11858	0.0169832	0.891123	0.995335	0.48557	0.0983471	0.0716113	0.00197911	0.998133	0.0308648	0.999814	0.613733	0.739812	0.999233	0.998335	0.851156	0.0242769	0.0927725	0.9983	0.0127708	0.948041	0.0316214	0.999997
ARCME-EPENDY1	0.996463	-1.13953e-08	4.23088e-09	FALSE	0.397893	0.721207	0.626011	0.996601	0.998816	0.797875	0.874914	0.0728093	0.977009	0.998266	0.838986	0.456555	0.957033	0.754355	0.0530297	0.546652	0.724328	0.627457	0.996176	0.266942	0.302031	0.954116	0.349686	0.990496	0.260267	0.999333	0.246216	0.114553	0.991233	0.984807	0.413856	0.768967	0.464716	0.617922	0.102568	0.878548	0.377784	0.996418
POA-MURAL2	0.997106	-1.20178e-08	4.3549e-09	FALSE	0.169928	0.994517	0.585135	0.500687	0.999814	0.535483	0.142956	0.0202137	0.150268	0.999782	0.000407313	0.998402	0.780929	0.224752	0.878228	0.0181738	0.0126947	0.591904	0.999283	0.321433	0.172794	0.615975	0.0856565	0.989487	0.856009	0.997367	0.365652	0.286694	0.999722	0.997554	0.970525	0.019533	0.357021	0.992811	0.010022	0.750669	0.0231717	0.999989
POA-EPI2	0.997758	-1.65895e-08	5.83747e-09	FALSE	0.159544	0.561685	0.697918	0.99646	0.996867	0.357842	0.19969	0.0162271	0.603542	0.998198	0.011709	1	0.753928	0.300371	0.350006	0.208954	0.231292	0.865002	0.999631	0.745333	0.147873	0.85096	0.0590455	0.99998	0.156016	0.999907	0.224108	0.637845	0.999846	0.997566	0.990112	0.0662818	0.167882	0.980684	0.0823004	0.983046	0.385579	0.999715
VMH-NEURO36	0.998056	-1.63416e-08	5.66027e-09	FALSE	0.0488676	0.463239	0.568861	0.85507	0.159996	0.502237	0.172459	0.541478	0.924982	0.228729	0.112956	0.0276255	0.0777633	0.416214	0.0306717	0.0247049	0.47806	0.289958	0.706009	0.36446	0.56966	0.0376293	0.826197	0.147076	0.232782	0.383919	0.475551	0.692549	0.754843	0.253333	0.322348	0.180673	0.0370736	0.860271	0.0960476	0.529393	0.15382	0.626343
ARCME-EPI1	0.998411	-1.35928e-08	4.60774e-09	FALSE	0.322094	0.817483	0.774941	0.994335	0.999295	0.399299	0.0302046	0.107168	0.203757	0.999969	0.000203836	1	0.959472	0.425671	0.672444	0.0409684	0.041626	0.915366	0.999952	0.407602	0.283353	0.385716	0.0438016	0.997405	0.20723	0.999998	0.578901	0.641229	0.992048	0.991645	0.999598	0.00492895	0.627122	0.98416	0.01305	0.982097	0.402819	0.999995
POA-EPI3	0.998481	-1.45256e-08	4.90083e-09	FALSE	0.172884	0.880953	0.789016	0.995963	0.999749	0.279731	0.0409345	0.059783	0.109144	0.999999	0.00138437	0.999999	0.73628	0.422394	0.556087	0.045022	0.0107916	0.996972	0.99956	0.385689	0.400938	0.232214	0.0977784	0.99985	0.105404	0.999997	0.274564	0.628842	0.999994	0.999643	0.994965	0.011636	0.398198	0.78776	0.00588257	0.635529	0.0273502	0.999989
ARCME-TANY2	0.998601	-1.20137e-08	4.01917e-09	FALSE	0.232822	0.521828	0.116631	0.341079	0.995401	0.589642	0.41071	0.837089	0.293372	0.999571	0.16472	0.999698	0.0737089	0.939947	0.373681	0.000659454	0.24652	0.917171	0.999152	0.0164766	0.0759539	0.0604512	0.441856	0.966536	0.685008	0.983738	0.215582	0.481714	0.953384	0.999627	0.995661	0.150853	0.331393	0.439314	0.105891	0.303263	0.00576333	0.995934
LHA-EPI1	0.998901	-1.3288e-08	4.33948e-09	FALSE	0.173491	0.765054	0.600373	0.964775	0.999861	0.237954	0.0014722	0.0909034	0.0805622	0.999999	6.56903e-05	1	0.964784	0.578468	0.66542	0.0266529	0.0113419	0.799831	0.999995	0.0380047	0.395473	0.267629	0.0995806	0.999984	0.686416	0.999996	0.845272	0.862859	0.999751	0.997356	0.999979	0.000134387	0.588026	0.981561	0.0244723	0.773278	0.0212559	0.999999
POA-EPI1	0.999157	-1.29393e-08	4.11978e-09	FALSE	0.123956	0.729832	0.878318	0.849124	0.998297	0.420514	0.127595	0.020991	0.0747969	0.999998	0.00622581	1	0.938139	0.442507	0.824127	0.279623	0.00515913	0.962008	0.999694	0.134374	0.235711	0.209623	0.00776696	0.998571	0.0368534	0.999999	0.119834	0.483871	0.999278	0.99335	0.996228	0.0529132	0.394844	0.917647	0.00293345	0.927427	0.280816	0.999979
HYPR-OLIGO1	0.999223	-1.60355e-08	5.06758e-09	FALSE	0.287474	0.978497	0.274189	0.491539	0.982376	0.962768	0.827712	0.462695	0.210938	0.999943	0.772703	0.956617	0.653153	0.164599	0.937609	0.993612	0.379605	0.1257	0.989765	0.7858	0.157062	0.85901	0.60844	0.997765	0.928106	0.999843	0.475332	0.320986	0.996723	0.529747	0.824422	0.834988	0.96291	0.985152	0.717745	0.878413	0.395612	0.995094
ARCME-EPENDY2	0.999418	-1.24877e-08	3.84516e-09	FALSE	0.783728	0.422525	0.657815	0.984679	0.998888	0.731819	0.619026	0.0531905	0.995171	0.999722	0.370474	0.511698	0.991645	0.493308	0.545699	0.606921	0.70446	0.767273	0.999793	0.213815	0.199852	0.987357	0.506864	0.960065	0.713281	0.999983	0.707595	0.0793799	0.971415	0.990461	0.624764	0.625335	0.945089	0.719257	0.110959	0.999103	0.734514	0.99998
HYPR-MICRO1	0.999456	-2.24096e-08	6.85989e-09	FALSE	0.107138	0.702683	0.636765	0.855111	0.993556	0.936455	0.130996	0.0115437	0.0211864	0.999283	0.129318	0.999411	0.806742	0.975622	0.632757	0.343506	0.0529679	0.835469	0.999267	0.0266559	0.0239211	0.0123347	0.0248262	0.999877	0.00422373	0.999873	0.171881	0.0308835	0.999998	0.986572	0.828282	0.244711	0.102393	0.926507	0.0304256	0.880931	0.192122	0.999999
HYPR-EPENDY1	0.999741	-1.57221e-08	4.52962e-09	FALSE	0.190167	0.632351	0.524449	0.961391	0.99891	0.759442	0.71253	0.0860254	0.976205	0.999168	0.490957	0.9663	0.972973	0.16361	0.651644	0.798094	0.737811	0.928921	0.999996	0.785171	0.319664	0.825409	0.342034	0.994858	0.501902	0.990502	0.369501	0.0563865	0.999512	0.994877	0.503031	0.646048	0.973232	0.797685	0.21745	0.986205	0.499813	0.999682
VMH-EPI1	0.999843	-1.76317e-08	4.89365e-09	FALSE	0.108306	0.510883	0.563648	0.855495	0.996718	0.033877	0.20642	0.202195	0.388773	0.999996	0.00344159	1	0.681266	0.398718	0.401486	0.00523575	0.233565	0.983759	0.999994	0.312342	0.857999	0.277698	0.477704	0.999738	0.496396	0.999901	0.91997	0.982191	0.999238	0.918872	0.999412	0.0264518	0.786551	0.805663	0.142114	0.935647	0.0947268	0.999985
ARCME-MURAL2	0.999848	-1.61461e-08	4.46932e-09	FALSE	0.256737	0.98553	0.585084	0.952233	0.998415	0.329098	0.0655689	0.25193	0.961211	1	9.84909e-05	0.999999	0.963525	0.209403	0.752987	0.010573	0.352908	0.885873	1	0.468438	0.308913	0.143903	0.347968	0.995303	0.588471	0.999961	0.923308	0.945656	0.999997	0.999942	0.999851	0.00637392	0.290953	0.97847	0.286037	0.982301	0.0571098	0.999982
HYPR-MURAL1	0.999901	-2.38073e-08	6.39875e-09	FALSE	0.256695	0.999537	0.459774	0.951339	0.999999	0.647735	0.0446634	0.0717373	0.477836	1	0.000169888	0.999993	0.307269	0.345175	0.96441	0.00303137	0.253358	0.968518	0.999992	0.685534	0.419317	0.242999	0.427334	1	0.902993	0.999999	0.978884	0.825973	0.999103	0.999966	0.979408	0.00113333	0.735607	0.995681	0.230312	0.953609	0.0268342	1
HYPC-EPITH1	0.999939	-1.83996e-08	4.78786e-09	FALSE	0.126359	0.871678	0.5867	0.93551	0.999635	0.454961	0.104578	0.0896662	0.333344	0.999996	0.00217722	1	0.885955	0.254007	0.642535	0.076662	0.0643961	0.915616	0.999963	0.493802	0.163514	0.558425	0.010676	0.998381	0.139499	0.999911	0.424488	0.208422	0.999615	0.99984	0.997495	0.0244503	0.169835	0.772183	0.0376285	0.990884	0.343133	0.999989
ARCME-FIBRO3	0.999947	-1.9042e-08	4.91491e-09	FALSE	0.423328	0.999946	0.76622	0.703416	1	0.7473	0.894065	0.0166136	0.155816	0.990351	0.221255	1	0.785649	0.468021	0.752541	3.73739e-05	0.0633572	0.981278	0.999958	0.320968	0.306922	0.122761	0.104523	0.991931	0.0555408	0.999647	0.710965	0.28519	0.991306	0.993892	0.929607	0.655122	0.0423884	0.836404	0.0285904	0.143363	0.000499276	0.999973
VMH-OTHER2	0.999958	-1.85181e-08	4.71152e-09	FALSE	0.179865	0.918492	0.664163	0.918319	0.660817	0.558677	0.378306	0.00140397	0.040154	0.991252	0.0230825	0.984976	0.912796	0.630019	0.143998	0.33153	0.0084099	0.83171	0.991162	0.678915	0.500686	0.860868	0.00244552	0.998428	0.000997651	0.997878	0.00219429	0.000427173	1	0.962732	0.966357	0.314956	0.00448584	0.94201	0.00331732	0.999631	0.931636	0.999986
ARCME-TANY1	0.999969	-1.6122e-08	4.02873e-09	FALSE	0.151798	0.562355	0.518085	0.771002	0.999187	0.301511	0.640816	0.632257	0.462697	0.981844	0.35103	0.999693	0.266785	0.986811	0.200154	0.000397091	0.34762	0.740911	0.999171	0.0504778	0.421627	0.258289	0.231554	0.998107	0.20439	0.975395	0.255083	0.291391	0.938262	0.999331	0.990196	0.247806	0.142961	0.496667	0.176347	0.839252	0.166444	0.999913
ARCME-MURAL1	0.999976	-1.78311e-08	4.39075e-09	FALSE	0.235426	0.681476	0.875516	0.941637	0.986872	0.32574	0.00349943	0.00462419	0.487561	0.999706	4.09959e-06	0.999866	0.973148	0.944684	0.438261	0.00870164	0.15425	0.735746	0.999528	0.819269	0.609118	0.353554	0.324403	0.992335	0.19919	0.999951	0.630499	0.324729	0.960687	0.996904	0.936439	0.000545812	0.133906	0.922688	0.194508	0.933276	0.112541	0.999993
POA-FIBRO1	0.999984	-1.85746e-08	4.46434e-09	FALSE	0.181306	0.97965	0.365312	0.914561	0.999983	0.391953	0.886836	0.0790595	0.0214979	0.999839	0.541102	0.999982	0.496379	0.348742	0.807121	1.35688e-05	0.00558624	0.98601	0.999994	0.0152177	0.313457	0.0308049	0.371715	0.994539	0.0559102	0.997954	0.721409	0.130433	0.999391	0.995383	0.960681	0.489813	0.0759659	0.946479	0.00628159	0.131401	0.00287443	0.999959
LHA-FIBRO1	0.999989	-2.02515e-08	4.76469e-09	FALSE	0.483359	0.99545	0.709554	0.873719	1	0.243717	0.680477	0.0680167	0.335301	0.999848	0.101311	0.999921	0.335576	0.255906	0.251678	0.000151481	0.108384	0.915235	0.999998	0.0292601	0.569277	0.0587334	0.374936	0.995805	0.294584	0.995651	0.94004	0.733304	0.999573	0.998879	0.996052	0.165764	0.0348436	0.722459	0.114831	0.00745644	0.00010562	0.999956
HYPC-EPITH2	1	-2.1622e-08	4.32073e-09	FALSE	0.121797	0.926567	0.519991	0.905836	0.999998	0.220111	0.0818144	0.0815299	0.237507	0.999999	0.00141128	1	0.926236	0.261312	0.690939	0.000993573	0.0384168	0.947154	1	0.0819746	0.394027	0.0665741	0.0926934	0.999911	0.593471	0.999999	0.570817	0.388261	0.999997	1	0.999205	0.0152673	0.238744	0.851897	0.0295527	0.979214	0.108733	1
HYPR-EPI1	1	-2.9706e-08	5.18126e-09	FALSE	0.400606	0.995428	0.48982	0.974843	0.999979	0.526309	0.370962	0.199593	0.513448	1	0.00185375	1	0.960924	0.597444	0.524207	0.00499889	0.0555447	0.999488	0.999998	0.402682	0.398786	0.181909	0.00625991	1	0.247206	1	0.541715	0.708006	0.999995	0.999785	0.997287	0.00491837	0.284659	0.969376	0.0336462	0.999325	0.144186	1
