# Supplementary material for: Genetic mapping of etiologic brain cell types for obesity
Source: eLife. 2020 Sep 21;9:e55851. doi: 10.7554/eLife.55851 (PMC7505664; doi:10.7554/eLife.55851)
Supplement: Figure 5—source data 3. [file elife-55851-fig5-data3.xlsx]

## Sheet: 14 - ESmu HYP BMI cell-types
gene	gene_name	POA-NEURO66	ARCME-NEURO29	LHA-NEURO20	POA-NEURO21
ENSG00000166736	HTR3A	0.993828	0.67916	0	0.871382
ENSG00000155657	TTN	0.993618	0	0	0
ENSG00000118520	ARG1	0.987169	0.144158	0	0.418188
ENSG00000175077	RTP1	0.980468	0.449725	0	0
ENSG00000119147	C2orf40	0.97617	0	0	0
ENSG00000165215	CLDN3	0.968041	0	0	0
ENSG00000105369	CD79A	0.966449	0	0	0
ENSG00000132874	SLC14A2	0.961816	0	0	0
ENSG00000158815	FGF17	0.956482	0	0	0
ENSG00000165588	OTX2	0.956443	0.126517	0	0
ENSG00000002745	WNT16	0.951509	0	0	0
ENSG00000141682	PMAIP1	0.948358	0.0834598	0.69478	0
ENSG00000118271	TTR	0.946846	0	0	0
ENSG00000170262	MRAP	0.946837	0	0	0
ENSG00000186847	KRT14	0.945865	0	0	0
ENSG00000178934	LGALS7B	0.943447	0.0168816	0	0
ENSG00000070159	PTPN3	0.943283	0.89336	0	0
ENSG00000153266	FEZF2	0.942221	0	0	0
ENSG00000092850	TEKT2	0.935307	0	0	0.404182
ENSG00000140873	ADAMTS18	0.934907	0.839193	0	0
ENSG00000137142	IGFBPL1	0.921371	0	0	0
ENSG00000168348	INSM2	0.919182	0	0	0
ENSG00000185313	SCN10A	0.916998	0	0	0
ENSG00000118156	ZNF541	0.914999	0	0	0
ENSG00000136457	CHAD	0.911585	0.146813	0	0
ENSG00000151365	THRSP	0.907902	0	0	0
ENSG00000139800	ZIC5	0.902205	0	0	0
ENSG00000162456	KNCN	0.900091	0.909544	0	0
ENSG00000119547	ONECUT2	0.899636	0	0	0
ENSG00000148488	ST8SIA6	0.894335	0	0.122591	0
ENSG00000026559	KCNG1	0.8939	0	0	0
ENSG00000156711	MAPK13	0.893451	0	0	0.372368
ENSG00000112706	IMPG1	0.893093	0	0	0
ENSG00000023839	ABCC2	0.891943	0	0	0.527982
ENSG00000124664	SPDEF	0.888425	0	0	0
ENSG00000043355	ZIC2	0.884074	0.0464719	0.131846	0.568956
ENSG00000091138	SLC26A3	0.881033	0	0	0
ENSG00000112212	TSPO2	0.879864	0	0	0
ENSG00000149305	HTR3B	0.878791	0	0	0.875473
ENSG00000163157	TMOD4	0.874197	0	0	0.633904
ENSG00000205899	BHLHA9	0.871467	0	0	0
ENSG00000186710	CFAP73	0.865708	0	0	0
ENSG00000049283	EPN3	0.865445	0	0	0
ENSG00000174963	ZIC4	0.864678	0	0	0
ENSG00000141505	ASGR1	0.856997	0	0	0
ENSG00000077238	IL4R	0.853993	0	0.0239062	0
ENSG00000115194	SLC30A3	0.853736	0	0	0
ENSG00000182195	LDOC1	0.852776	0	0	0
ENSG00000073861	TBX21	0.851572	0	0	0
ENSG00000168878	SFTPB	0.850429	0	0	0
ENSG00000205683	DPF3	0.847468	0	0	0.804705
ENSG00000000005	TNMD	0.845746	0.23768	0	0
ENSG00000189056	RELN	0.840984	0	0.819946	0
ENSG00000185467	KPNA7	0.840633	0	0	0
ENSG00000164825	DEFB1	0.835318	0.949753	0	0
ENSG00000075891	PAX2	0.833181	0	0	0
ENSG00000188800	TMCO2	0.832968	0	0	0
ENSG00000170162	VGLL2	0.830954	0.913706	0	0
ENSG00000157890	MEGF11	0.830922	0.965825	0	0
ENSG00000108753	NA	0.827192	0.117932	0	0
ENSG00000158022	TRIM63	0.826624	0	0	0.953959
ENSG00000149972	CNTN5	0.825369	0.794759	0.939904	0
ENSG00000169856	ONECUT1	0.824941	0	0	0
ENSG00000175356	SCUBE2	0.824152	0	0	0
ENSG00000101443	WFDC2	0.823421	0	0	0
ENSG00000147862	NFIB	0.823117	0	0	0
ENSG00000134376	CRB1	0.822676	0	0	0
ENSG00000171811	CFAP46	0.819815	0.055956	0	0
ENSG00000134398	ERN2	0.819703	0	0	0
ENSG00000168071	CCDC88B	0.819496	0.496508	0	0
ENSG00000189409	MMP23B	0.817346	0	0	0
ENSG00000122420	PTGFR	0.816724	0.0182094	0.0360041	0
ENSG00000144355	DLX1	0.816507	0	0	0
ENSG00000156574	NODAL	0.816141	0	0	0
ENSG00000146555	SDK1	0.814777	0	0	0
ENSG00000161249	DMKN	0.812678	0	0	0
ENSG00000148734	NPFFR1	0.811291	0.93879	0.338627	0
ENSG00000198471	RTP2	0.803807	0	0	0
ENSG00000183765	CHEK2	0.80246	0	0	0
ENSG00000125780	TGM3	0.801907	0	0	0
ENSG00000177669	MBOAT4	0.799946	0	0	0
ENSG00000167524	SGK494	0.798578	0.386468	0	0
ENSG00000204618	RNF39	0.795688	0	0	0
ENSG00000152137	HSPB8	0.792785	0	0	0
ENSG00000214681	IQCF5	0.792208	0	0	0
ENSG00000102524	TNFSF13B	0.790769	0	0.0809089	0
ENSG00000178394	HTR1A	0.78941	0.777851	0.395865	0
ENSG00000130711	PRDM12	0.786098	0.436864	0	0
ENSG00000146910	CNPY1	0.785802	0	0	0
ENSG00000171532	NEUROD2	0.784218	0	0.43783	0
ENSG00000198125	MB	0.782816	0	0	0
ENSG00000169676	DRD5	0.779655	0	0.281975	0
ENSG00000152977	ZIC1	0.778093	0	0	0.243238
ENSG00000140368	PSTPIP1	0.777792	0	0	0
ENSG00000227729	RD3L	0.774349	0	0	0.962967
ENSG00000127831	VIL1	0.774011	0.128044	0	0
ENSG00000165862	NA	0.771396	0	0	0
ENSG00000147036	LANCL3	0.770868	0	0	0
ENSG00000143333	RGS16	0.769048	0	0	0
ENSG00000115507	OTX1	0.76656	0	0.0400609	0
ENSG00000008441	NFIX	0.759382	0	0	0
ENSG00000262484	CCER2	0.756135	0	0.0872237	0
ENSG00000161714	PLCD3	0.755454	0	0	0.224968
ENSG00000215045	GRID2IP	0.754344	0	0	0.776673
ENSG00000165376	CLDN2	0.753118	0	0	0
ENSG00000123901	GPR83	0.751517	0.855078	0	0
ENSG00000139767	SRRM4	0.748891	0.774476	0	0
ENSG00000214688	C10orf105	0.747946	0	0	0
ENSG00000204978	ERICH4	0.745075	0	0	0
ENSG00000213139	CRYGS	0.744624	0	0	0
ENSG00000102802	MEDAG	0.742219	0.200753	0	0
ENSG00000188816	HMX2	0.740834	0	0	0
ENSG00000108846	ABCC3	0.740428	0	0	0
ENSG00000124713	GNMT	0.740388	0	0	0
ENSG00000119042	SATB2	0.739393	0.862353	0	0
ENSG00000149654	CDH22	0.738376	0.739248	0.0859851	0
ENSG00000179088	C12orf42	0.736928	0	0	0
ENSG00000083457	ITGAE	0.736667	0	0	0
ENSG00000136449	MYCBPAP	0.734502	0	0	0
ENSG00000121211	MND1	0.732903	0	0	0
ENSG00000008516	MMP25	0.729989	0	0	0
ENSG00000174016	FAM46D	0.728778	0	0	0
ENSG00000124701	APOBEC2	0.728515	0	0	0
ENSG00000168509	HFE2	0.726733	0	0	0
ENSG00000197646	PDCD1LG2	0.726359	0	0	0
ENSG00000198759	EGFL6	0.72557	0	0	0
ENSG00000246922	UBAP1L	0.724435	0	0	0
ENSG00000197753	LHFPL5	0.720139	0	0.157871	0
ENSG00000169946	ZFPM2	0.719705	0.00253469	0	0
ENSG00000156564	LRFN2	0.719575	0.836506	0.27511	0
ENSG00000129673	AANAT	0.718864	0	0	0
ENSG00000100625	SIX4	0.716301	0.069044	0	0.765937
ENSG00000100473	COCH	0.711661	0	0	0
ENSG00000166446	CDYL2	0.709623	0.204556	0.183673	0
ENSG00000151651	ADAM8	0.706279	0	0	0
ENSG00000133067	LGR6	0.705089	0.0356601	0	0
ENSG00000108384	RAD51C	0.703573	0	0.038171	0
ENSG00000164038	SLC9B2	0.703421	0.836442	0	0
ENSG00000142182	DNMT3L	0.702577	0	0	0
ENSG00000133665	DYDC2	0.698693	0	0	0
ENSG00000148204	CRB2	0.69838	0	0	0
ENSG00000147724	FAM135B	0.695963	0.3779	0	0
ENSG00000162552	WNT4	0.695931	0.168969	0	0
ENSG00000206075	SERPINB5	0.695818	0	0	0
ENSG00000155085	AK9	0.694849	0	0	0
ENSG00000115844	DLX2	0.692746	0	0	0
ENSG00000064270	ATP2C2	0.691847	0.177479	0	0
ENSG00000130720	FIBCD1	0.691821	0	0.828372	0
ENSG00000177106	EPS8L2	0.691741	0	0	0
ENSG00000172238	ATOH1	0.688686	0	0	0
ENSG00000148704	VAX1	0.688331	0.650191	0	0
ENSG00000198963	RORB	0.685635	0	0	0
ENSG00000178773	CPNE7	0.685399	0.614085	0	0
ENSG00000172543	CTSW	0.685375	0.159522	0	0
ENSG00000079616	KIF22	0.685325	0.00862352	0.252082	0
ENSG00000146700	SSC4D	0.682987	0	0	0
ENSG00000176769	TCERG1L	0.682387	0.920669	0	0
ENSG00000165105	RASEF	0.681966	0	0	0
ENSG00000069018	TRPC7	0.678976	0.913191	0	0.58562
ENSG00000229183	PGA4	0.676394	0	0	0
ENSG00000184445	KNTC1	0.674913	0	0	0
ENSG00000112053	SLC26A8	0.674402	0	0	0
ENSG00000095464	PDE6C	0.6732	0	0	0
ENSG00000204613	TRIM10	0.67216	0	0	0
ENSG00000110195	FOLR1	0.66958	0	0	0
ENSG00000078814	MYH7B	0.6693	0.15296	0.813533	0
ENSG00000071539	TRIP13	0.667957	0	0	0
ENSG00000163702	IL17RC	0.667408	0	0.624318	0
ENSG00000173250	GPR151	0.667032	0	0	0
ENSG00000163701	IL17RE	0.666353	0.0624052	0	0
ENSG00000165120	SSMEM1	0.665686	0	0	0.735413
ENSG00000162877	PM20D1	0.665208	0	0	0
ENSG00000127129	EDN2	0.664779	0	0	0
ENSG00000101282	RSPO4	0.663523	0	0	0
ENSG00000130270	ATP8B3	0.660477	0	0	0.355817
ENSG00000164600	NEUROD6	0.659919	0	0.918312	0
ENSG00000165462	PHOX2A	0.658911	0	0	0
ENSG00000196208	GREB1	0.657253	0	0	0
ENSG00000150656	CNDP1	0.656215	0	0	0
ENSG00000174640	SLCO2A1	0.653791	0	0	0
ENSG00000226742	HSBP1L1	0.652714	0	0	0
ENSG00000134762	DSC3	0.652343	0.141502	0	0
ENSG00000185551	NR2F2	0.651388	0.802739	0	0.841127
ENSG00000172367	PDZD3	0.650828	0	0	0
ENSG00000137078	SIT1	0.650626	0	0	0.733768
ENSG00000114854	TNNC1	0.646819	0	0	0
ENSG00000182545	RNASE10	0.646574	0	0	0
ENSG00000075429	CACNG5	0.645002	0	0	0.704635
ENSG00000168843	FSTL5	0.641696	0.00940171	0	0.1936
ENSG00000240764	PCDHGC5	0.641291	0	0.107916	0
ENSG00000101638	ST8SIA5	0.640408	0.761678	0.794857	0.616119
ENSG00000135480	KRT7	0.639671	0	0	0
ENSG00000177483	RBM44	0.63907	0	0	0.421024
ENSG00000198483	ANKRD35	0.638895	0.199732	0	0
ENSG00000215187	FAM166B	0.638515	0	0	0.142654
ENSG00000105048	TNNT1	0.635851	0	0.203823	0
ENSG00000138083	SIX3	0.635701	0	0	0
ENSG00000168546	GFRA2	0.634607	0.0974967	0.922242	0
ENSG00000112343	TRIM38	0.63067	0	0	0
ENSG00000146839	ZAN	0.627179	0	0	0
ENSG00000204347	BTBD17	0.623702	0	0	0
ENSG00000171931	FBXW10	0.621971	0	0	0
ENSG00000061656	SPAG4	0.62114	0	0.291257	0
ENSG00000156925	ZIC3	0.619672	0	0.111562	0
ENSG00000137745	MMP13	0.617748	0	0	0
ENSG00000109452	INPP4B	0.616874	0	0.412764	0.653224
ENSG00000162894	FCMR	0.613983	0	0	0.366864
ENSG00000203797	DDO	0.613619	0	0	0
ENSG00000158825	CDA	0.612481	0	0	0
ENSG00000142233	NTN5	0.612477	0	0	0
ENSG00000163435	ELF3	0.612354	0	0	0
ENSG00000100918	REC8	0.610912	0.154806	0.604219	0
ENSG00000170615	SLC26A5	0.609571	0	0	0
ENSG00000148344	PTGES	0.608385	0	0.19779	0.0831754
ENSG00000160161	CILP2	0.605406	0	0	0.733217
ENSG00000133107	TRPC4	0.605389	0	0	0
ENSG00000178342	KCNG2	0.605323	0.397217	0.166103	0.908189
ENSG00000197506	SLC28A3	0.603826	0.182212	0	0
ENSG00000168517	HEXIM2	0.600623	0.260419	0.333522	0.0549532
ENSG00000163873	GRIK3	0.599605	0	0	0
ENSG00000144645	OSBPL10	0.599465	0	0	0.373112
ENSG00000184454	NCMAP	0.59892	0	0	0.258178
ENSG00000139537	CCDC65	0.59795	0	0.10583	0
ENSG00000118513	MYB	0.59738	0	0	0
ENSG00000175352	NRIP3	0.596023	0	0.252454	0.201628
ENSG00000072657	TRHDE	0.594761	0.00151745	0.899132	0
ENSG00000143858	SYT2	0.593706	0.928074	0.576885	0
ENSG00000121005	CRISPLD1	0.592221	0	0	0
ENSG00000174514	MFSD4A	0.592138	0	0.85853	0.524595
ENSG00000100024	UPB1	0.591695	0	0	0
ENSG00000027644	INSRR	0.591118	0	0	0
ENSG00000101438	SLC32A1	0.590014	0	0	0
ENSG00000133135	RNF128	0.589804	0	0	0
ENSG00000129744	ART1	0.589747	0	0	0
ENSG00000085999	RAD54L	0.589648	0	0	0
ENSG00000187664	HAPLN4	0.587351	0.973986	0.583733	0
ENSG00000115556	PLCD4	0.585179	0	0	0
ENSG00000154839	SKA1	0.584259	0	0	0
ENSG00000164749	HNF4G	0.583834	0	0	0
ENSG00000171126	KCNG3	0.583411	0	0	0
ENSG00000066583	ISOC1	0.583348	0	0.151782	0
ENSG00000152217	SETBP1	0.583047	0	0	0
ENSG00000254585	MAGEL2	0.582803	0.0482033	0.272914	0
ENSG00000185052	SLC24A3	0.581418	0.650229	0.544577	0
ENSG00000081138	CDH7	0.580593	0.862177	0.947929	0.147517
ENSG00000106483	SFRP4	0.579526	0	0	0
ENSG00000186297	GABRA5	0.578958	0.919563	0.827278	0
ENSG00000162599	NFIA	0.578715	0	0	0
ENSG00000131042	LILRB2	0.578342	0	0	0
ENSG00000133863	TEX15	0.576671	0.00418857	0	0.920193
ENSG00000188730	VWC2	0.573986	0	0.251623	0
ENSG00000126218	F10	0.573727	0	0	0.0187204
ENSG00000102935	ZNF423	0.573141	0	0.719994	0.801346
ENSG00000213889	PPM1N	0.572886	0	0	0.734879
ENSG00000129009	ISLR	0.569924	0	0	0.812691
ENSG00000121297	TSHZ3	0.569125	0.136989	0.45052	0
ENSG00000004848	ARX	0.567963	0	0	0
ENSG00000184697	CLDN6	0.567101	0	0	0
ENSG00000183837	PNMA3	0.566747	0.393938	0.188156	0
ENSG00000225828	FAM229A	0.56613	0	0	0.0293839
ENSG00000109158	GABRA4	0.564175	0.848652	0	0
ENSG00000147231	CXorf57	0.561814	0	0	0
ENSG00000133124	IRS4	0.561631	0	0.0058734	0
ENSG00000178764	ZHX2	0.561621	0	0	0
ENSG00000077713	SLC25A43	0.561347	0	0	0.597677
ENSG00000183691	NOG	0.560263	0.643297	0	0
ENSG00000109944	C11orf63	0.560113	0	0	0
ENSG00000139287	TPH2	0.560038	0	0	0.651637
ENSG00000162643	WDR63	0.559825	0	0	0
ENSG00000100285	NEFH	0.55978	0.356444	0.318165	0.845949
ENSG00000185274	GALNT17	0.558528	0.933614	0.493347	0.782917
ENSG00000151892	GFRA1	0.558313	0	0	0
ENSG00000203780	FANK1	0.557972	0.145609	0	0
ENSG00000167768	KRT1	0.5549	0	0.256354	0
ENSG00000147234	FRMPD3	0.553739	0.22362	0.570401	0
ENSG00000161647	MPP3	0.553146	0	0.576337	0.117341
ENSG00000007402	CACNA2D2	0.551947	0	0.423217	0
ENSG00000109832	DDX25	0.55147	0.207013	0.649285	0.135412
ENSG00000136750	GAD2	0.550823	0	0	0
ENSG00000163347	CLDN1	0.548945	0	0	0.817699
ENSG00000198795	ZNF521	0.548378	0	0.685418	0
ENSG00000218336	TENM3	0.548223	0.238659	0.206395	0.167677
ENSG00000127743	IL17B	0.546233	0	0	0
ENSG00000158966	CACHD1	0.544323	0.00550263	0	0
ENSG00000081148	IMPG2	0.543725	0	0	0
ENSG00000119703	ZC2HC1C	0.543473	0	0	0
ENSG00000162009	SSTR5	0.542791	0	0	0
ENSG00000137261	KIAA0319	0.540775	0.452359	0.533034	0
ENSG00000086548	CEACAM6	0.540596	0	0	0
ENSG00000153820	SPHKAP	0.540129	0	0.678718	0.751655
ENSG00000127334	DYRK2	0.539683	0	0	0
ENSG00000120051	CFAP58	0.539239	0	0	0
ENSG00000142698	C1orf94	0.539179	0.148517	0	0
ENSG00000107187	LHX3	0.537981	0.0362291	0	0
ENSG00000164674	SYTL3	0.537956	0	0	0
ENSG00000106789	CORO2A	0.53782	0.833294	0.213544	0
ENSG00000181408	UTS2R	0.537179	0	0	0
ENSG00000187556	NANOS3	0.537009	0	0	0
ENSG00000011083	SLC6A7	0.535781	0.717848	0.65562	0
ENSG00000188620	HMX3	0.534904	0	0	0
ENSG00000242114	MTFP1	0.534626	0.904416	0.0248532	0.138615
ENSG00000163285	GABRG1	0.533805	0.377021	0	0
ENSG00000159753	CARMIL2	0.533225	0	0.209181	0
ENSG00000165349	SLC7A3	0.532708	0.448356	0.564032	0
ENSG00000088035	ALG6	0.532438	0	0	0
ENSG00000140090	SLC24A4	0.531327	0.940288	0	0
ENSG00000058866	DGKG	0.529232	0.903708	0.279043	0.309573
ENSG00000156885	COX6A2	0.528774	0	0.85161	0
ENSG00000132849	PATJ	0.527924	0	0.809243	0.260934
ENSG00000165731	RET	0.527735	0	0	0
ENSG00000158874	APOA2	0.526669	0	0	0.0730211
ENSG00000171759	PAH	0.526638	0	0	0
ENSG00000182264	IZUMO1	0.525471	0	0	0
ENSG00000100490	CDKL1	0.524827	0	0.720493	0
ENSG00000113763	UNC5A	0.524742	0.837931	0.0124929	0
ENSG00000143375	CGN	0.523597	0.394125	0.62619	0
ENSG00000172137	CALB2	0.523415	0.88575	0	0.855971
ENSG00000174482	LINGO2	0.523266	0.825097	0.381401	0.100172
ENSG00000112530	PACRG	0.523243	0	0	0
ENSG00000175029	CTBP2	0.522771	0	0	0.758684
ENSG00000183090	FREM3	0.522177	0.40526	0	0
ENSG00000067842	ATP2B3	0.521909	0.888358	0.539105	0
ENSG00000161202	DVL3	0.521593	0	0	0.494825
ENSG00000160326	SLC2A6	0.520854	0.59398	0.567524	0
ENSG00000115474	KCNJ13	0.519871	0	0	0.499065
ENSG00000165695	AK8	0.519185	0	0	0
ENSG00000158516	CPA2	0.517909	0.236432	0	0
ENSG00000069188	SDK2	0.517347	0	0.776371	0
ENSG00000156206	CFAP161	0.516535	0	0	0
ENSG00000186409	CCDC30	0.515518	0	0.658744	0
ENSG00000158748	HTR6	0.51467	0	0	0
ENSG00000112902	SEMA5A	0.514184	0.740562	0	0.716236
ENSG00000072858	SIDT1	0.514158	0.909962	0.246734	0
ENSG00000196141	SPATS2L	0.514139	0.542865	0.193973	0
ENSG00000119408	NEK6	0.513402	0	0	0
ENSG00000128596	CCDC136	0.511293	0	0.378089	0
ENSG00000095539	SEMA4G	0.510141	0	0.00114205	0
ENSG00000171345	KRT19	0.509969	0	0	0
ENSG00000128683	GAD1	0.506801	0	0	0
ENSG00000132793	LPIN3	0.506186	0	0	0
ENSG00000169783	LINGO1	0.505379	0.769027	0.378993	0
ENSG00000196132	MYT1	0.50262	0	0.0334912	0
ENSG00000105880	DLX5	0.502568	0	0	0
ENSG00000164045	CDC25A	0.502068	0	0.076793	0
ENSG00000206538	VGLL3	0.501599	0	0	0
ENSG00000170293	CMTM8	0.501517	0.169909	0	0
ENSG00000158062	UBXN11	0.500875	0	0.181404	0
ENSG00000204624	DISP3	0.500224	0	0	0
ENSG00000130590	SAMD10	0.50007	0	0.545652	0.150069
ENSG00000139910	NOVA1	0.499487	0.706867	0.532812	0
ENSG00000174326	SLC16A11	0.499427	0.837036	0	0
ENSG00000183578	TNFAIP8L3	0.498762	0	0	0
ENSG00000233608	TWIST2	0.497742	0.0869579	0	0
ENSG00000152782	PANK1	0.4975	0	0	0
ENSG00000165061	ZMAT4	0.497073	0.848172	0.457527	0
ENSG00000159239	AC005041.1	0.495939	0	0	0
ENSG00000164237	CMBL	0.495445	0.88628	0	0
ENSG00000168993	CPLX1	0.495243	0.761963	0.547087	0.315914
ENSG00000138400	MDH1B	0.495243	0	0	0
ENSG00000189410	SH2D5	0.494931	0.742034	0.489471	0
ENSG00000176720	BOK	0.493454	0.0998457	0.709932	0
ENSG00000034053	APBA2	0.492785	0	0.535805	0
ENSG00000203910	C1orf146	0.491259	0.67133	0	0
ENSG00000179242	CDH4	0.491097	0.939715	0.893827	0
ENSG00000115590	IL1R2	0.490922	0.120859	0	0
ENSG00000167377	ZNF23	0.490762	0.0293447	0.422172	0
ENSG00000166924	NYAP1	0.49068	0	0.381672	0
ENSG00000269190	FBXO17	0.490556	0	0	0.167085
ENSG00000140848	CPNE2	0.489127	0	0	0
ENSG00000145087	STXBP5L	0.489033	0.750349	0.15331	0.278241
ENSG00000047597	XK	0.488602	0.7581	0	0
ENSG00000163914	RHO	0.488448	0	0	0
ENSG00000108515	ENO3	0.487689	0	0.251606	0.0007109
ENSG00000104327	CALB1	0.487619	0.810252	0	0.18574
ENSG00000162728	KCNJ9	0.48602	0.377528	0.141756	0.617841
ENSG00000172426	RSPH9	0.485952	0	0.09523	0
ENSG00000124134	KCNS1	0.485838	0.851707	0.500384	0
ENSG00000113749	HRH2	0.485116	0	0	0
ENSG00000142661	MYOM3	0.484953	0	0	0
ENSG00000178460	MCMDC2	0.483624	0	0	0
ENSG00000102595	UGGT2	0.482616	0	0.0829751	0
ENSG00000112964	GHR	0.482141	0	0	0.213612
ENSG00000112232	KHDRBS2	0.482027	0.672029	0	0.648219
ENSG00000143479	DYRK3	0.481966	0	0	0
ENSG00000126787	DLGAP5	0.481364	0	0	0
ENSG00000165868	HSPA12A	0.47915	0.802563	0.288465	0
ENSG00000147256	ARHGAP36	0.478524	0	0.79252	0
ENSG00000112320	SOBP	0.478521	0.193219	0.202816	0.104362
ENSG00000116771	AGMAT	0.478194	0	0	0
ENSG00000089169	RPH3A	0.476201	0	0.509373	0
ENSG00000109576	AADAT	0.475961	0	0	0
ENSG00000250067	YJEFN3	0.475851	0.460363	0.232673	0
ENSG00000182667	NTM	0.474123	0.587879	0.419591	0.709867
ENSG00000117707	PROX1	0.473051	0	0	0
ENSG00000198797	BRINP2	0.473014	0.412684	0	0
ENSG00000103269	RHBDL1	0.472814	0	0	0
ENSG00000137486	ARRB1	0.472773	0	0.313624	0
ENSG00000124785	NRN1	0.472345	0	0.987157	0.936749
ENSG00000138829	FBN2	0.471709	0	0	0
ENSG00000183873	SCN5A	0.471528	0.930519	0.495972	0
ENSG00000182450	KCNK4	0.471408	0.941659	0	0
ENSG00000008283	CYB561	0.471264	0.556226	0.111171	0
ENSG00000107105	ELAVL2	0.470724	0	0.660696	0.218857
ENSG00000104888	SLC17A7	0.470074	0	0.137931	0.987696
ENSG00000060718	COL11A1	0.469714	0	0.9837	0
ENSG00000176076	KCNE5	0.469561	0	0	0
ENSG00000125967	NECAB3	0.46934	0.595821	0.330353	0
ENSG00000076770	MBNL3	0.467063	0	0	0
ENSG00000006377	DLX6	0.466054	0	0	0
ENSG00000163273	NPPC	0.465326	0	0	0
ENSG00000154229	PRKCA	0.464966	0	0.157878	0
ENSG00000171224	C10orf35	0.464759	0.080417	0.389383	0.166954
ENSG00000136444	RSAD1	0.464658	0.0777388	0	0
ENSG00000140525	FANCI	0.463299	0	0	0
ENSG00000187242	KRT12	0.462972	0	0	0.316866
ENSG00000167619	TMEM145	0.462458	0.761189	0.418234	0
ENSG00000145864	GABRB2	0.462284	0.898646	0.528128	0.663281
ENSG00000083750	RRAGB	0.462107	0.326523	0.00338295	0
ENSG00000198732	SMOC1	0.461321	0	0	0
ENSG00000136425	CIB2	0.461219	0.0938746	0.175317	0
ENSG00000129003	VPS13C	0.460766	0	0	0
ENSG00000053702	NRIP2	0.459733	0.666725	0.242798	0
ENSG00000161544	CYGB	0.459586	0	0.606708	0
ENSG00000100156	SLC16A8	0.458597	0	0	0
ENSG00000003249	DBNDD1	0.458577	0	0.378212	0.00123213
ENSG00000126262	FFAR2	0.456888	0	0	0
ENSG00000152894	PTPRK	0.456458	0	0.035521	0
ENSG00000233932	CTXN2	0.456328	0.466373	0.368471	0
ENSG00000183087	GAS6	0.456092	0	0.0554573	0
ENSG00000132386	SERPINF1	0.455127	0	0	0
ENSG00000173421	CCDC36	0.455089	0.326849	0	0
ENSG00000102878	HSF4	0.454635	0.618434	0.293458	0
ENSG00000181585	TMIE	0.454238	0.105983	0.625569	0
ENSG00000162989	KCNJ3	0.453192	0.859492	0.0597839	0
ENSG00000197826	C4orf22	0.452474	0	0	0
ENSG00000162783	IER5	0.452001	0	0	0
ENSG00000176182	MYPOP	0.451853	0.17427	0.380831	0.204253
ENSG00000135324	MRAP2	0.451674	0.37495	0	0
ENSG00000105251	SHD	0.45154	0	0.813751	0.201581
ENSG00000166189	HPS6	0.451021	0	0	0
ENSG00000189420	ZFP92	0.450985	0	0	0
ENSG00000049130	KITLG	0.450418	0	0	0.919985
ENSG00000173258	ZNF483	0.449973	0.142748	0	0
ENSG00000198929	NOS1AP	0.449611	0.625006	0	0
ENSG00000103460	TOX3	0.449368	0.388384	0.141063	0
ENSG00000019505	SYT13	0.44931	0.767327	0.569257	0
ENSG00000128408	RIBC2	0.449047	0	0	0
ENSG00000106633	GCK	0.448437	0	0.119728	0
ENSG00000186367	KIAA1024L	0.447888	0.0561966	0.277061	0
ENSG00000164651	SP8	0.447328	0	0	0
ENSG00000078725	BRINP1	0.446787	0.472346	0.793669	0.734724
ENSG00000163888	CAMK2N2	0.44543	0.532424	0.440716	0.155126
ENSG00000111913	RIPOR2	0.445335	0	0.528645	0
ENSG00000022355	GABRA1	0.445134	0.927364	0.665894	0.569196
ENSG00000181652	ATG9B	0.444682	0.81625	0.763722	0
ENSG00000171551	ECEL1	0.44454	0	0	0
ENSG00000160753	RUSC1	0.444382	0.38336	0.589319	0.0553228
ENSG00000184949	FAM227A	0.444134	0	0.442287	0
ENSG00000095932	SMIM24	0.44374	0	0	0
ENSG00000144815	NXPE3	0.443725	0.396189	0.415129	0
ENSG00000125398	SOX9	0.442066	0	0	0
ENSG00000152910	CNTNAP4	0.441876	0.837296	0.66424	0
ENSG00000172602	RND1	0.441353	0.0712772	0.726302	0
ENSG00000137124	ALDH1B1	0.441181	0.00583114	0	0
ENSG00000067715	SYT1	0.44114	0.633789	0.250213	0.0887137
ENSG00000169083	AR	0.441028	0.736669	0.499664	0
ENSG00000125355	TMEM255A	0.440779	0	0.649872	0
ENSG00000145808	ADAMTS19	0.440732	0.148859	0	0
ENSG00000108828	VAT1	0.440379	0	0.31352	0
ENSG00000074621	SLC24A1	0.440279	0	0	0
ENSG00000111371	SLC38A1	0.439033	0	0.530287	0.190365
ENSG00000169213	RAB3B	0.438233	0	0.00598216	0.720109
ENSG00000169750	RAC3	0.438188	0.210675	0.367268	0
ENSG00000089091	DZANK1	0.437887	0.740591	0.51259	0
ENSG00000164494	PDSS2	0.437701	0	0.17695	0.226628
ENSG00000149575	SCN2B	0.436964	0.864874	0.619078	0.367149
ENSG00000170571	EMB	0.436601	0.0185185	0	0.012691
ENSG00000181449	SOX2	0.436343	0	0	0
ENSG00000165553	NGB	0.436329	0.0258547	0	0
ENSG00000169255	B3GALNT1	0.436149	0.14509	0.333934	0.151552
ENSG00000183114	FAM43B	0.435954	0.617794	0	0
ENSG00000113319	RASGRF2	0.435255	0.950661	0	0
ENSG00000186810	CXCR3	0.435234	0	0	0
ENSG00000156097	GPR61	0.434265	0.607101	0.528865	0
ENSG00000111907	TPD52L1	0.43402	0.511332	0	0
ENSG00000196189	SEMA4A	0.433979	0.573576	0	0
ENSG00000112425	EPM2A	0.433838	0.00918803	0.0972507	0
ENSG00000070808	CAMK2A	0.433674	0.58894	0	0
ENSG00000249242	TMEM150C	0.43345	0.469347	0.0975551	0
ENSG00000166228	PCBD1	0.433423	0	0.191421	0
ENSG00000040341	STAU2	0.433255	0.126403	0.461619	0
ENSG00000186469	GNG2	0.43284	0.287141	0.344957	0
ENSG00000089116	LHX5	0.43199	0.337006	0.902956	0.714856
ENSG00000111331	OAS3	0.431062	0.353526	0	0
ENSG00000134533	RERG	0.430733	0.897381	0.373018	0
ENSG00000136002	ARHGEF4	0.430666	0.51722	0.429784	0
ENSG00000166448	TMEM130	0.430661	0.460589	0.547736	0
ENSG00000131386	GALNT15	0.430596	0	0	0
ENSG00000182472	CAPN12	0.43019	0	0	0.184079
ENSG00000148798	INA	0.429992	0.622216	0.413478	0.38299
ENSG00000114113	RBP2	0.429914	0	0	0
ENSG00000149582	TMEM25	0.429599	0.587823	0.314935	0.0645638
ENSG00000177875	CCDC184	0.429373	0	0.723473	0.0847708
ENSG00000100908	EMC9	0.429237	0.0600427	0.571839	0.0130606
ENSG00000187240	DYNC2H1	0.428701	0.231633	0.125387	0
ENSG00000250510	GPR162	0.428586	0.594837	0.417386	0.419718
ENSG00000156042	CFAP70	0.428219	0	0	0
ENSG00000186675	MAGEE2	0.428117	0	0.49819	0
ENSG00000102452	NALCN	0.428013	0.378405	0.303061	0.0518728
ENSG00000175894	TSPEAR	0.428008	0	0	0
ENSG00000049089	COL9A2	0.427982	0	0.647286	0
ENSG00000135709	KIAA0513	0.42794	0.199771	0.337067	0.163581
ENSG00000134595	SOX3	0.427769	0	0	0
ENSG00000142621	FHAD1	0.427235	0	0.548568	0
ENSG00000151917	BEND6	0.426912	0.711997	0.575193	0
ENSG00000253457	SMIM18	0.426834	0.304451	0.554621	0.045589
ENSG00000138078	PREPL	0.426662	0.533004	0	0
ENSG00000100167	2020-09-03	0.426603	0.311749	0.552425	0.263814
ENSG00000157036	EXOG	0.426536	0.410784	0	0
ENSG00000089199	CHGB	0.42647	0.313043	0.402011	0
ENSG00000115963	RND3	0.42642	0.44536	0	0
ENSG00000164620	RELL2	0.426384	0.648433	0.645216	0.280544
ENSG00000006555	TTC22	0.426282	0	0	0
ENSG00000260230	FRRS1L	0.426093	0.673843	0.415952	0
ENSG00000150556	LYPD6B	0.425546	0.693562	0	0
ENSG00000104435	STMN2	0.425371	0.503112	0.410269	0.233859
ENSG00000106070	GRB10	0.425368	0.397099	0.383326	0
ENSG00000158457	TSPAN33	0.425019	0.294721	0.0220252	0
ENSG00000188368	PRR19	0.424457	0	0	0
ENSG00000162076	FLYWCH2	0.424351	0	0.337618	0.220214
ENSG00000102181	CD99L2	0.424137	0.522559	0.239143	0
ENSG00000136872	ALDOB	0.423993	0	0	0
ENSG00000124578	NA	0.423938	0	0	0
ENSG00000158301	GPRASP2	0.423669	0.194516	0.60282	0
ENSG00000103528	SYT17	0.423615	0	0.823329	0
ENSG00000184785	SMIM10	0.423398	0.434419	0.469821	0
ENSG00000139182	CLSTN3	0.423154	0.523427	0.557584	0.163997
ENSG00000021645	NRXN3	0.423047	0	0	0.140833
ENSG00000135549	PKIB	0.42298	0	0.567524	0
ENSG00000186153	WWOX	0.422893	0.077475	0.185786	0
ENSG00000114631	PODXL2	0.422381	0.496642	0.389474	0.223632
ENSG00000131864	USP29	0.421494	0.514809	0.576704	0.180631
ENSG00000140323	DISP2	0.421033	0.54224	0.567584	0
ENSG00000077782	FGFR1	0.420805	0.448876	0.179628	0
ENSG00000127561	SYNGR3	0.420398	0.543587	0.519672	0.097585
ENSG00000168243	GNG4	0.420143	0	0.324545	0
ENSG00000115461	IGFBP5	0.419864	0	0	0
ENSG00000182793	GSTA5	0.419225	0	0	0
ENSG00000177511	ST8SIA3	0.418943	0.522715	0.406568	0
ENSG00000205090	TMEM240	0.41889	0.304892	0.430139	0.386661
ENSG00000109436	TBC1D9	0.418872	0.279821	0.51786	0.0746673
ENSG00000102226	USP11	0.41853	0.162892	0.394701	0
ENSG00000179542	SLITRK4	0.418158	0.666197	0.538341	0.197058
ENSG00000134317	GRHL1	0.41814	0.907793	0	0
ENSG00000172301	COPRS	0.417896	0	0.579475	0
ENSG00000135097	MSI1	0.417833	0	0	0.253052
ENSG00000109265	KIAA1211	0.417491	0.632921	0.0353491	0
ENSG00000091409	ITGA6	0.416877	0	0	0
ENSG00000214140	PRCD	0.416803	0	0.118911	0
ENSG00000186462	NAP1L2	0.416623	0.584907	0.659291	0.0692459
ENSG00000113966	ARL6	0.416617	0	0.172162	0
ENSG00000129159	KCNC1	0.416275	0.83169	0.646417	0.366541
ENSG00000204991	SPIRE2	0.416195	0	0.484818	0
ENSG00000151834	GABRA2	0.416114	0.821318	0.394981	0.436823
ENSG00000163576	EFHB	0.415431	0	0	0
ENSG00000164466	SFXN1	0.415339	0.133832	0.356664	0
ENSG00000013392	RWDD2A	0.415132	0.311425	0.223681	0
ENSG00000074317	SNCB	0.414969	0.730067	0.506744	0.411796
ENSG00000037042	TUBG2	0.413905	0.411633	0.32946	0.0170034
ENSG00000087085	ACHE	0.413709	0.653081	0.562939	0.236421
ENSG00000231824	AKAIN1	0.413555	0	0.266822	0.130834
ENSG00000162374	ELAVL4	0.413515	0.293897	0.506386	0.27624
ENSG00000145194	ECE2	0.413431	0.114919	0.414659	0
ENSG00000070718	AP3M2	0.412727	0.375562	0.496979	0
ENSG00000081800	SLC13A1	0.41221	0	0	0
ENSG00000183571	PGPEP1L	0.411955	0	0	0
ENSG00000166025	AMOTL1	0.411882	0.0594017	0.304316	0
ENSG00000163288	GABRB1	0.41188	0.81454	0.304977	0
ENSG00000130540	SULT4A1	0.411532	0.623265	0.408317	0.109167
ENSG00000136197	C7orf25	0.410765	0	0.47754	0
ENSG00000161681	SHANK1	0.410629	0	0.323953	0.491289
ENSG00000257704	INAFM1	0.410466	0.105271	0.514059	0.329972
ENSG00000138622	HCN4	0.410179	0.702783	0	0.0932774
ENSG00000135373	EHF	0.40995	0	0	0
ENSG00000144191	CNGA3	0.409939	0	0	0.964562
ENSG00000125510	OPRL1	0.409447	0.664775	0.488085	0
ENSG00000204116	CHIC1	0.409323	0	0.365254	0
ENSG00000125861	GFRA4	0.409272	0.439117	0.603122	0.00320355
ENSG00000156515	HK1	0.409101	0.182226	0.215688	0.00616067
ENSG00000167094	TTC16	0.409006	0	0	0
ENSG00000143367	TUFT1	0.408952	0	0	0
ENSG00000173442	EHBP1L1	0.408687	0.111522	0.230977	0
ENSG00000242732	RTL5	0.408627	0	0.338919	0
ENSG00000142330	CAPN10	0.408563	0	0.465686	0
ENSG00000153714	LURAP1L	0.408506	0	0	0.268822
ENSG00000187079	TEAD1	0.408199	0	0	0
ENSG00000178732	GP5	0.407894	0	0	0
ENSG00000176194	CIDEA	0.407833	0	0.28959	0
ENSG00000136531	SCN2A	0.407696	0	0.525336	0
ENSG00000135537	AFG1L	0.407605	0	0.0981619	0
ENSG00000197702	PARVA	0.407309	0.0632382	0	0.172836
ENSG00000091583	APOH	0.40712	0	0	0
ENSG00000130813	C19orf66	0.407102	0.147042	0.400693	0
ENSG00000089818	NECAP1	0.406958	0.202237	0.42007	0.122597
ENSG00000164951	PDP1	0.406471	0.6871	0.182507	0.071587
ENSG00000104760	FGL1	0.406341	0.592736	0	0
ENSG00000028277	POU2F2	0.405847	0	0	0
ENSG00000189120	SP6	0.405658	0	0	0.205798
ENSG00000106689	LHX2	0.405467	0	0	0
ENSG00000185519	FAM131C	0.40546	0	0.523765	0
ENSG00000149150	SLC43A1	0.404602	0	0	0
ENSG00000153253	SCN3A	0.404525	0.536913	0.70293	0
ENSG00000132821	VSTM2L	0.403956	0.416577	0.340872	0
ENSG00000060566	CREB3L3	0.403865	0	0	0
ENSG00000130822	PNCK	0.403574	0.61956	0.437877	0
ENSG00000122970	IFT81	0.403025	0	0.249359	0
ENSG00000165895	ARHGAP42	0.402675	0	0	0
ENSG00000125246	CLYBL	0.402601	0	0	0
ENSG00000197177	ADGRA1	0.401611	0.643495	0.32187	0
ENSG00000134121	CHL1	0.401456	0.863066	0.105286	0.521163
ENSG00000175745	NR2F1	0.401452	0.480161	0.358921	0.682126
ENSG00000105696	TMEM59L	0.401403	0.449309	0.540952	0.199359
ENSG00000124194	GDAP1L1	0.401312	0.416427	0.38796	0.262175
ENSG00000066422	ZBTB11	0.401217	0.289847	0.422024	0
ENSG00000152954	NRSN1	0.401041	0.248764	0.264563	0.182602
ENSG00000158560	DYNC1I1	0.400904	0.565019	0.248616	0
ENSG00000124818	OPN5	0.400876	0	0	0
ENSG00000186416	NKRF	0.400757	0.463027	0.545561	0
ENSG00000182463	TSHZ2	0.400756	0.476921	0	0.334154
ENSG00000149927	DOC2A	0.400682	0.97394	0.116239	0
ENSG00000132872	SYT4	0.400473	0.459641	0.408997	0.285735
ENSG00000117016	RIMS3	0.400424	0.0613248	0.469386	0
ENSG00000185988	PLK5	0.400073	0.589083	0.150922	0
ENSG00000171303	KCNK3	0.399216	0	0.278478	0
ENSG00000186047	DLEU7	0.399092	0.512397	0.274232	0
ENSG00000008056	SYN1	0.39904	0.647087	0.347399	0
ENSG00000130055	GDPD2	0.398939	0.35005	0	0
ENSG00000139725	RHOF	0.398716	0.650833	0.550725	0
ENSG00000090470	PDCD7	0.398712	0.0509259	0.415534	0
ENSG00000100092	SH3BP1	0.398534	0.440465	0.392371	0.075653
ENSG00000127995	CASD1	0.398514	0.211632	0.397963	0
ENSG00000182836	PLCXD3	0.398391	0.461385	0	0
ENSG00000144647	POMGNT2	0.398374	0.482832	0.211345	0
ENSG00000089847	ANKRD24	0.39832	0	0.351519	0
ENSG00000183597	TANGO2	0.398	0.5514	0.300591	0
ENSG00000169432	SCN9A	0.397506	0	0.20359	0
ENSG00000177989	ODF3B	0.397493	0	0	0.465331
ENSG00000160310	PRMT2	0.397273	0	0.411284	0
ENSG00000197586	ENTPD6	0.396922	0.798124	0.250012	0
ENSG00000008735	MAPK8IP2	0.396892	0.410025	0.383266	0.159192
ENSG00000105613	MAST1	0.396644	0.544934	0.326099	0
ENSG00000100320	RBFOX2	0.396146	0.2749	0.345753	0.303841
ENSG00000145920	CPLX2	0.396127	0.572988	0.555421	0
ENSG00000257987	TEX49	0.396014	0	0	0
ENSG00000152214	RIT2	0.395807	0.131695	0.346036	0.304124
ENSG00000136099	PCDH8	0.395718	0.932581	0	0.73243
ENSG00000182870	GALNT9	0.395531	0.849143	0.635194	0.150552
ENSG00000140836	ZFHX3	0.395379	0	0	0.542311
ENSG00000119242	CCDC92	0.395318	0.298274	0.475443	0.00948743
ENSG00000172346	CSDC2	0.395258	0.0492225	0.133001	0.713639
ENSG00000176055	MBLAC2	0.395233	0.388186	0.253469	0
ENSG00000108175	ZMIZ1	0.394812	0	0.0908765	0
ENSG00000196405	EVL	0.394627	0.0764245	0.391282	0
ENSG00000105173	CCNE1	0.394532	0.799499	0.320545	0
ENSG00000101180	HRH3	0.394459	0.848629	0	0
ENSG00000140284	SLC27A2	0.394051	0.647398	0.823117	0
ENSG00000174996	KLC2	0.393755	0.494574	0.407778	0.111385
ENSG00000164114	MAP9	0.393688	0.310411	0.420835	0.105717
ENSG00000183186	C2CD4C	0.393302	0	0	0
ENSG00000165644	COMTD1	0.393219	0.282264	0.112273	0.00800887
ENSG00000198846	TOX	0.393189	0	0.818051	0
ENSG00000115137	DNAJC27	0.393173	0.349978	0.561302	0.00406604
ENSG00000108231	LGI1	0.392713	0.881616	0.259641	0
ENSG00000242173	ARHGDIG	0.392687	0.524067	0.307303	0
ENSG00000086300	SNX10	0.392463	0.298081	0.349172	0
ENSG00000087263	OGFOD1	0.392423	0.84049	0.581906	0
ENSG00000005486	RHBDD2	0.3922	0.227414	0.287645	0
ENSG00000155970	MICU3	0.392147	0.56197	0.284939	0
ENSG00000205922	ONECUT3	0.391827	0	0	0
ENSG00000104722	NEFM	0.391809	0.791589	0.614646	0.932741
ENSG00000119523	ALG2	0.391527	0	0.526799	0
ENSG00000165304	MELK	0.391148	0	0	0
ENSG00000138606	SHF	0.391075	0.318516	0.0531687	0
ENSG00000081026	MAGI3	0.3907	0.186325	0.176655	0
ENSG00000108684	ASIC2	0.390429	0.181366	0.796405	0.613527
ENSG00000135374	ELF5	0.389921	0	0	0
ENSG00000196371	FUT4	0.389756	0	0	0
ENSG00000112759	SLC29A1	0.389199	0	0	0
ENSG00000173950	XXYLT1	0.389189	0	0	0
ENSG00000099365	STX1B	0.38906	0.545923	0.398671	0.115205
ENSG00000112146	FBXO9	0.389	0.152726	0.377392	0.219378
ENSG00000103365	GGA2	0.388949	0	0.221074	0
ENSG00000095370	SH2D3C	0.388882	0	0	0
ENSG00000167216	KATNAL2	0.388388	0	0	0
ENSG00000155966	AFF2	0.388372	0.302528	0.370981	0
ENSG00000151176	PLBD2	0.387781	0.249139	0.0748897	0
ENSG00000188042	ARL4C	0.387721	0	0.568207	0
ENSG00000173805	HAP1	0.38765	0.398002	0.38253	0
ENSG00000145029	NICN1	0.387414	0.160514	0.315172	0
ENSG00000174521	TTC9B	0.387402	0.361663	0.391068	0.137137
ENSG00000081248	CACNA1S	0.387384	0	0	0
ENSG00000124140	SLC12A5	0.387311	0.833668	0.51008	0
ENSG00000113327	GABRG2	0.387283	0.801194	0.65016	0.262287
ENSG00000173838	2020-03-10	0.387279	0	0	0
ENSG00000067445	TRO	0.387249	0.36498	0.420495	0
ENSG00000111912	NCOA7	0.387156	0.302438	0.383287	0.0624692
ENSG00000147246	HTR2C	0.387098	0.12173	0.604751	0
ENSG00000160190	SLC37A1	0.386971	0	0	0
ENSG00000064692	SNCAIP	0.38687	0	0	0
ENSG00000163806	SPDYA	0.386711	0	0.174567	0
ENSG00000184897	H1FX	0.386663	0.20946	0.205614	0
ENSG00000180044	C3orf80	0.386612	0	0	0
ENSG00000115762	PLEKHB2	0.386468	0.0814103	0.388566	0.16794
ENSG00000146072	TNFRSF21	0.386344	0.57542	0.175044	0.125308
ENSG00000145332	KLHL8	0.38628	0.181867	0	0.0556925
ENSG00000168081	PNOC	0.386244	0	0.0528304	0
ENSG00000129749	CHRNA10	0.385563	0	0	0
ENSG00000203877	RIPPLY2	0.385507	0.277523	0	0
ENSG00000156172	C8orf37	0.385267	0	0.0977259	0
ENSG00000117155	SSX2IP	0.385223	0.733123	0.406162	0
ENSG00000155846	PPARGC1B	0.385169	0.375976	0.474111	0.537684
ENSG00000118276	B4GALT6	0.384821	0.468974	0.380725	0.0682602
ENSG00000130119	GNL3L	0.384761	0.266631	0.39054	0.0446033
ENSG00000144285	SCN1A	0.384749	0.841008	0.413484	0.135658
ENSG00000186487	MYT1L	0.384391	0.821126	0.55783	0
ENSG00000144460	NYAP2	0.384156	0	0.28044	0
ENSG00000116857	TMEM9	0.384013	0.490184	0.193938	0
ENSG00000240694	PNMA2	0.383903	0.443002	0.528397	0
ENSG00000104381	GDAP1	0.383579	0.226756	0.519387	0
ENSG00000186310	NAP1L3	0.383558	0.291912	0.568935	0.00480532
ENSG00000215218	UBE2QL1	0.383449	0.857468	0.392845	0
ENSG00000108439	PNPO	0.383435	0.144563	0.418451	0.281616
ENSG00000186364	NUDT17	0.383396	0	0	0
ENSG00000165194	PCDH19	0.383046	0.637779	0	0
ENSG00000120053	GOT1	0.382986	0.608993	0.391506	0.206999
ENSG00000106976	DNM1	0.38293	0.73375	0.442774	0.145515
ENSG00000149231	CCDC82	0.381394	0	0	0.0852637
ENSG00000111962	UST	0.381357	0.514919	0	0
ENSG00000079841	RIMS1	0.381251	0	0.218978	0
ENSG00000178252	WDR6	0.381032	0.405321	0.42631	0
ENSG00000167778	SPRYD3	0.380909	0.255712	0.398885	0.0364712
ENSG00000164220	F2RL2	0.380622	0	0	0
ENSG00000104140	RHOV	0.38011	0.397155	0.703636	0
ENSG00000144406	UNC80	0.380016	0.576309	0.566723	0.292012
ENSG00000184524	CEND1	0.379889	0.329299	0.536493	0.393361
ENSG00000198208	RPS6KL1	0.379535	0.267668	0.355982	0
ENSG00000116127	ALMS1	0.379365	0.12831	0.0805706	0
ENSG00000047648	ARHGAP6	0.379176	0	0	0
ENSG00000171861	MRM3	0.378961	0	0.78408	0.0586496
ENSG00000184611	KCNH7	0.378928	0.957805	0.0703323	0.49324
ENSG00000168280	KIF5C	0.378675	0.504041	0.326012	0.486701
ENSG00000198046	ZNF667	0.378612	0	0.388589	0
ENSG00000105711	SCN1B	0.378067	0.798957	0.32349	0.807949
ENSG00000127220	ABHD8	0.378061	0.139044	0.317712	0.244865
ENSG00000168917	SLC35G2	0.378059	0.0898148	0.581133	0.322847
ENSG00000011677	GABRA3	0.377786	0.554894	0.041712	0
ENSG00000168724	DNAJC21	0.377754	0	0.244691	0
ENSG00000204186	ZDBF2	0.377748	0	0.535107	0
ENSG00000185774	KCNIP4	0.377449	0.39574	0.635054	0
ENSG00000090512	FETUB	0.37742	0	0	0
ENSG00000165716	FAM69B	0.377291	0.419294	0.472464	0.0582799
ENSG00000115526	CHST10	0.377199	0.602811	0.348895	0
ENSG00000146352	CLVS2	0.377056	0	0.651842	0.104978
ENSG00000130300	PLVAP	0.376603	0.231116	0.64895	0
ENSG00000204564	C6orf136	0.376524	0.129711	0.54678	0.0638245
ENSG00000124507	PACSIN1	0.376442	0.47854	0.570107	0.222335
ENSG00000125841	NRSN2	0.376249	0.474531	0.480956	0.00973386
ENSG00000112624	BICRAL	0.376023	0	0.308608	0
ENSG00000159899	NPR2	0.375877	0	0.135087	0
ENSG00000204392	LSM2	0.37567	0	0	0
ENSG00000130558	OLFM1	0.37563	0.129202	0.499013	0.451947
ENSG00000032742	IFT88	0.375563	0	0	0
ENSG00000168803	ADAL	0.375536	0	0	0
ENSG00000164953	TMEM67	0.375425	0	0.0281349	0
ENSG00000132294	EFR3A	0.37517	0.027208	0.320414	0
ENSG00000129244	ATP1B2	0.375022	0	0	0.406106
ENSG00000184205	TSPYL2	0.374834	0.212417	0.400398	0
ENSG00000101945	SUV39H1	0.374541	0.0786007	0	0
ENSG00000173960	UBXN2A	0.374344	0	0.37044	0.605949
ENSG00000069667	RORA	0.374205	0	0	0.482036
ENSG00000105341	DMAC2	0.374125	0.0287037	0.307761	0.05138
ENSG00000069712	KIAA1107	0.374116	0	0.0662396	0
ENSG00000159398	CES5A	0.374026	0.0510243	0	0.0180095
ENSG00000143499	SMYD2	0.373999	0.0366809	0.0178377	0
ENSG00000258986	TMEM179	0.373894	0.801449	0.446122	0.0216856
ENSG00000065060	UHRF1BP1	0.37389	0	0.436704	0
ENSG00000059122	FLYWCH1	0.373803	0.344001	0.219907	0.202193
ENSG00000171435	KSR2	0.373657	0.202202	0.264543	0
ENSG00000167037	SGSM1	0.37364	0	0.464069	0
ENSG00000095951	HIVEP1	0.373408	0	0.328064	0
ENSG00000141576	RNF157	0.373349	0.816038	0.518874	0
ENSG00000186654	PRR5	0.373298	0	0	0
ENSG00000198844	ARHGEF15	0.373178	0	0.39962	0.162285
ENSG00000042317	SPATA7	0.372798	0	0.283855	0
ENSG00000189369	GSPT2	0.372654	0.286753	0.385432	0
ENSG00000103160	HSDL1	0.372614	0.165353	0.322038	0
ENSG00000143816	WNT9A	0.372589	0	0	0.553574
ENSG00000171033	PKIA	0.3725	0.588996	0.302555	0
ENSG00000080007	DDX43	0.372272	0.161988	0	0
ENSG00000178233	TMEM151B	0.372074	0.673824	0.401851	0.381306
ENSG00000125827	TMX4	0.371908	0.270382	0.418293	0.084278
ENSG00000101489	CELF4	0.371858	0.360421	0.355136	0
ENSG00000138823	MTTP	0.371647	0	0.415215	0
ENSG00000132854	KANK4	0.371563	0	0.642964	0
ENSG00000163596	ICA1L	0.371458	0.380934	0.237119	0
ENSG00000178974	FBXO34	0.371437	0.100306	0.176172	0.0320355
ENSG00000077264	PAK3	0.371367	0.2633	0.200075	0.112617
ENSG00000166848	TERF2IP	0.371181	0.164041	0.256374	0
ENSG00000172932	ANKRD13D	0.371172	0.471834	0.258299	0
ENSG00000213930	GALT	0.370744	0	0.175107	0.238434
ENSG00000198300	PEG3	0.370233	0.221937	0.390797	0
ENSG00000185055	EFCAB10	0.370148	0	0.349135	0
ENSG00000170500	LONRF2	0.370048	0.460115	0.419223	0
ENSG00000198932	GPRASP1	0.36983	0.283861	0.427336	0
ENSG00000003987	MTMR7	0.369794	0.450886	0.265537	0.029448
ENSG00000128891	CCDC32	0.369677	0	0.28117	0
ENSG00000142046	TMEM91	0.369666	0.766025	0.396994	0
ENSG00000165801	ARHGEF40	0.369665	0	0.0396369	0
ENSG00000157570	TSPAN18	0.369574	0	0.0188881	0
ENSG00000169760	NLGN1	0.36933	0.728004	0.245776	0
ENSG00000154059	IMPACT	0.369156	0.157123	0.458676	0
ENSG00000108395	TRIM37	0.369118	0.486235	0.375435	0
ENSG00000183248	PRR36	0.369014	0	0.45564	0
ENSG00000169218	RSPO1	0.369001	0	0	0
ENSG00000099812	MISP	0.368924	0	0	0
ENSG00000213023	SYT3	0.368878	0.802174	0.539321	0.00283391
ENSG00000164061	BSN	0.368796	0.48566	0.294088	0
ENSG00000133216	EPHB2	0.368789	0	0.367072	0
ENSG00000091986	CCDC80	0.368531	0	0	0
ENSG00000188191	PRKAR1B	0.368474	0.512665	0.424215	0.0693691
ENSG00000204291	COL15A1	0.368279	0.0134674	0	0
ENSG00000065989	PDE4A	0.368187	0.100358	0.502431	0.164747
ENSG00000007516	BAIAP3	0.368178	0.502233	0.315574	0
ENSG00000187122	SLIT1	0.368054	0.888318	0.151327	0
ENSG00000141560	FN3KRP	0.36793	0	0	0
ENSG00000006283	CACNA1G	0.36764	0.0665983	0.353447	0
ENSG00000170004	CHD3	0.367322	0.317084	0.318922	0.382508
ENSG00000144290	SLC4A10	0.367033	0.923609	0.542129	0.0736816
ENSG00000130956	HABP4	0.366954	0.398815	0.403384	0
ENSG00000113088	GZMK	0.366654	0	0	0
ENSG00000166780	C16orf45	0.366431	0.449089	0.413127	0.171513
ENSG00000070081	NUCB2	0.366364	0	0.050124	0
ENSG00000181215	C4orf50	0.366321	0	0	0
ENSG00000073969	NSF	0.36588	0.73657	0.375117	0
ENSG00000065609	SNAP91	0.365594	0.701853	0.344085	0
ENSG00000165023	DIRAS2	0.365167	0.342652	0.867435	0.881016
ENSG00000152332	UHMK1	0.365111	0.550635	0.390823	0
ENSG00000128951	DUT	0.364852	0	0.201283	0.161779
ENSG00000158856	DMTN	0.364423	0.495792	0.35285	0.137999
ENSG00000136011	STAB2	0.364372	0	0	0
ENSG00000128645	HOXD1	0.364248	0	0	0
ENSG00000108179	PPIF	0.364027	0.318272	0.764056	0
ENSG00000096872	IFT74	0.364006	0	0	0
ENSG00000112852	PCDHB2	0.36398	0	0	0
ENSG00000203952	CCDC160	0.363961	0	0	0
ENSG00000162706	CADM3	0.36378	0.812349	0.399243	0.191133
ENSG00000105409	ATP1A3	0.363738	0.7217	0.496405	0.206136
ENSG00000119782	FKBP1B	0.363608	0	0.465755	0
ENSG00000103888	CEMIP	0.363604	0	0.0327018	0
ENSG00000006071	ABCC8	0.363168	0.533548	0.055424	0
ENSG00000113805	CNTN3	0.362899	0.919047	0	0
ENSG00000100604	CHGA	0.362766	0.575477	0.530899	0.315097
ENSG00000055163	CYFIP2	0.362673	0.636485	0.394445	0.180508
ENSG00000157578	LCA5L	0.362549	0	0.479586	0
ENSG00000187823	RTL4	0.362009	0	0.287111	0
ENSG00000123178	SPRYD7	0.361984	0.115898	0.249028	0
ENSG00000198363	ASPH	0.361815	0.172491	0.429682	0
ENSG00000101557	USP14	0.361663	0.439939	0.377037	0
ENSG00000111726	CMAS	0.361555	0.381798	0.381935	0
ENSG00000196220	SRGAP3	0.361482	0.0917	0.212528	0
ENSG00000119333	WDR34	0.361393	0	0.13038	0
ENSG00000204316	MRPL38	0.361304	0	0.240329	0
ENSG00000185982	DEFB128	0.361298	0.15497	0	0.723534
ENSG00000161381	PLXDC1	0.361164	0.856022	0	0
ENSG00000213760	ATP6V1G2	0.360975	0.703069	0.364728	0.204534
ENSG00000167654	ATCAY	0.360834	0.511285	0.564082	0
ENSG00000186094	AGBL4	0.360815	0.260209	0.775622	0
ENSG00000158258	CLSTN2	0.360562	0.420067	0.151837	0.910172
ENSG00000167642	SPINT2	0.360523	0.112892	0.0210463	0
ENSG00000176788	BASP1	0.360373	0.268132	0.29884	0.145761
ENSG00000166171	DPCD	0.360195	0	0.384531	0
ENSG00000116337	AMPD2	0.360108	0.197347	0.44253	0
ENSG00000163788	SNRK	0.359965	0.203242	0.255478	0
ENSG00000081189	MEF2C	0.359745	0.181786	0	0
ENSG00000105717	PBX4	0.359491	0	0.534515	0.694481
ENSG00000196388	INCA1	0.359068	0	0	0
ENSG00000120262	CCDC170	0.359032	0	0	0
ENSG00000079462	PAFAH1B3	0.358867	0	0.403866	0
ENSG00000120054	CPN1	0.358821	0	0	0
ENSG00000166111	SVOP	0.358819	0.82588	0.541694	0
ENSG00000184682	NA	0.35868	0	0	0
ENSG00000115840	SLC25A12	0.35841	0.373748	0.302193	0
ENSG00000157216	SSBP3	0.358393	0	0.213648	0
ENSG00000050030	NEXMIF	0.358233	0.370291	0.0108223	0
ENSG00000105792	CFAP69	0.357645	0	0.328613	0
ENSG00000122966	CIT	0.357644	0.447092	0.458406	0.358151
ENSG00000137731	FXYD2	0.357607	0	0.429193	0
ENSG00000179008	C14orf39	0.357576	0	0.279191	0
ENSG00000161010	MRNIP	0.35749	0	0	0
ENSG00000154065	ANKRD29	0.357343	0	0.297803	0
ENSG00000162929	KIAA1841	0.357173	0	0.364392	0
ENSG00000049769	PPP1R3F	0.357141	0	0.199935	0.0689995
ENSG00000116675	DNAJC6	0.357092	0.588559	0.332122	0
ENSG00000112237	CCNC	0.356939	0.0251425	0.177441	0
ENSG00000135750	KCNK1	0.356702	0.653935	0.0879141	0.158358
ENSG00000120645	IQSEC3	0.356659	0.116863	0.501757	0
ENSG00000129951	PLPPR3	0.355789	0	0.44755	0
ENSG00000103494	RPGRIP1L	0.355397	0	0	0
ENSG00000132535	DLG4	0.355102	0.371121	0.385564	0
ENSG00000186377	CYP4X1	0.355032	0.410462	0.324895	0
ENSG00000111696	NT5DC3	0.354934	0.759916	0.487429	0.311547
ENSG00000214517	PPME1	0.354889	0	0.334044	0.0433711
ENSG00000031003	FAM13B	0.35488	0.088072	0.0569463	0
ENSG00000082175	PGR	0.354368	0.340103	0.191264	0
ENSG00000197024	ZNF398	0.354277	0	0.295787	0
ENSG00000183020	AP2A2	0.354204	0.120176	0.26223	0.0511336
ENSG00000088179	PTPN4	0.353872	0	0.308228	0
ENSG00000134265	NAPG	0.353737	0.47035	0.383302	0.14761
ENSG00000101365	IDH3B	0.353395	0.289678	0.330054	0.206629
ENSG00000182378	PLCXD1	0.353169	0.319895	0.545835	0
ENSG00000180773	SLC36A4	0.352975	0.620496	0.323563	0
ENSG00000204851	PNMA8B	0.352933	0.383949	0.390599	0
ENSG00000116254	CHD5	0.352779	0.157762	0.3923	0
ENSG00000183273	CCDC60	0.352766	0	0	0
ENSG00000089101	CFAP61	0.352453	0	0	0
ENSG00000198919	DZIP3	0.352417	0.236824	0.490472	0.120133
ENSG00000187957	DNER	0.352278	0.522528	0.414851	0.250495
ENSG00000166206	GABRB3	0.352181	0.721317	0.550882	0.103746
ENSG00000105223	PLD3	0.352125	0.261388	0.378454	0
ENSG00000137312	FLOT1	0.352065	0.224126	0.407163	0.0337605
ENSG00000162344	FGF19	0.351934	0	0	0
ENSG00000196465	MYL6B	0.351899	0	0.456789	0
ENSG00000182013	PNMA8A	0.351799	0.485478	0.36558	0
ENSG00000135298	ADGRB3	0.351777	0.617021	0.355852	0
ENSG00000138442	WDR12	0.351351	0.384748	0.0146594	0
ENSG00000107831	FGF8	0.351344	0	0	0
ENSG00000127824	TUBA4A	0.351165	0.58828	0.508365	0.203672
ENSG00000174527	MYO1H	0.350989	0.638403	0	0
ENSG00000141994	DUS3L	0.350951	0.221343	0.283996	0
ENSG00000147481	SNTG1	0.350945	0.273597	0.762471	0.144228
ENSG00000214510	SPINK13	0.350845	0	0	0
ENSG00000076826	CAMSAP3	0.350678	0.373323	0.70142	0
ENSG00000170382	LRRN2	0.350549	0.329638	0.144877	0
ENSG00000183775	KCTD16	0.350181	0	0	0
ENSG00000161642	ZNF385A	0.350023	0	0.40653	0.554726
ENSG00000166862	CACNG2	0.349746	0.55105	0.607198	0
ENSG00000101298	SNPH	0.349612	0.664789	0.556764	0
ENSG00000054938	CHRDL2	0.349495	0.852279	0	0
ENSG00000182256	GABRG3	0.349301	0.221	0.837432	0
ENSG00000156232	WHAMM	0.348696	0	0.347431	0.509772
ENSG00000134780	DAGLA	0.348669	0.540883	0.0124605	0
ENSG00000102003	SYP	0.348578	0.630971	0.456574	0.158576
ENSG00000188582	PAQR9	0.348567	0.891992	0.191685	0
ENSG00000179029	TMEM107	0.348556	0	0.249891	0
ENSG00000165379	LRFN5	0.348354	0.594654	0.427864	0
ENSG00000058056	USP13	0.347965	0.583685	0.114235	0.0660142
ENSG00000102078	SLC25A14	0.347944	0.469757	0.331142	0
ENSG00000171004	HS6ST2	0.347915	0.312883	0.618687	0.021932
ENSG00000184792	OSBP2	0.347871	0.138911	0.358487	0.338751
ENSG00000065559	MAP2K4	0.347691	0.519685	0.419075	0
ENSG00000101811	CSTF2	0.347561	0.472224	0.543036	0
ENSG00000168830	HTR1E	0.347428	0	0	0
ENSG00000164091	WDR82	0.347213	0.200732	0.136589	0
ENSG00000212864	RNF208	0.347036	0.473672	0.296261	0
ENSG00000114279	FGF12	0.346827	0.561422	0	0.728463
ENSG00000182698	RESP18	0.346315	0.349092	0.440513	0.199236
ENSG00000146006	LRRTM2	0.34615	0.120593	0.503405	0.213797
ENSG00000162687	KCNT2	0.346126	0	0.39217	0
ENSG00000050748	MAPK9	0.345928	0.40564	0.37817	0
ENSG00000148660	CAMK2G	0.345924	0.326478	0.196913	0
ENSG00000171365	CLCN5	0.345796	0	0.00386121	0
ENSG00000099960	SLC7A4	0.345736	0.500929	0.502833	0
ENSG00000013306	SLC25A39	0.345571	0	0	0
ENSG00000090932	DLL3	0.345507	0	0.786387	0
ENSG00000145526	CDH18	0.345383	0.523946	0.81965	0.116213
ENSG00000151014	NOCT	0.345236	0	0.466778	0.24793
ENSG00000166436	TRIM66	0.344458	0.0356439	0.314192	0
ENSG00000073150	PANX2	0.344347	0.262758	0.334691	0
ENSG00000117899	MESD	0.344005	0	0.0559604	0
ENSG00000133302	SLF1	0.343892	0	0.736808	0.0510103
ENSG00000163655	GMPS	0.343772	0.170917	0.426571	0
ENSG00000183570	PCBP3	0.343659	0	0.451084	0
ENSG00000105278	ZFR2	0.343217	0.147727	0.140942	0.200833
ENSG00000135931	ARMC9	0.342997	0.60725	0	0
ENSG00000166405	RIC3	0.342889	0.167573	0.391038	0.100665
ENSG00000152492	CCDC50	0.342848	0	0	0
ENSG00000109794	FAM149A	0.342801	0	0.407762	0
ENSG00000099910	KLHL22	0.342776	0.21374	0.417113	0.00135535
ENSG00000125814	NAPB	0.342705	0.814857	0.515729	0
ENSG00000141959	PFKL	0.342629	0.163691	0.795775	0
ENSG00000152556	PFKM	0.342609	0.381395	0.104162	0.149704
ENSG00000126001	CEP250	0.342427	0	0.18901	0
ENSG00000132434	LANCL2	0.342391	0.253592	0.550495	0
ENSG00000177380	PPFIA3	0.342309	0.303193	0.277084	0.0874815
ENSG00000179796	LRRC3B	0.342294	0.417297	0.00908201	0.782906
ENSG00000121281	ADCY7	0.342217	0	0.317922	0
ENSG00000196458	ZNF605	0.342216	0.0143162	0	0
ENSG00000196172	ZNF681	0.342109	0	0	0
ENSG00000173611	SCAI	0.341801	0	0.59628	0.0516264
ENSG00000004660	CAMKK1	0.341723	0.845044	0.560282	0
ENSG00000198860	TSEN15	0.341713	0.084655	0.204063	0.145534
ENSG00000131351	HAUS8	0.34156	0	0.0230604	0
ENSG00000242259	C22orf39	0.34134	0	0.291529	0
ENSG00000175782	SLC35E3	0.341178	0	0.218002	0
ENSG00000151320	AKAP6	0.341063	0.442837	0.373739	0
ENSG00000162873	KLHDC8A	0.340939	0.284957	0.686433	0.21418
ENSG00000116199	FAM20B	0.340819	0.362654	0.382902	0
ENSG00000136854	STXBP1	0.340796	0.560145	0.413746	0.173484
ENSG00000160226	C21orf2	0.340581	0.0203704	0.324714	0
ENSG00000137727	ARHGAP20	0.340249	0.537354	0.410379	0.307708
ENSG00000106261	ZKSCAN1	0.340145	0	0.0342474	0.0503943
ENSG00000196660	SLC30A10	0.340032	0.0879601	0.0994519	0
ENSG00000005175	RPAP3	0.340014	0	0.135817	0.0998029
ENSG00000174282	ZBTB4	0.339626	0	0.444292	0.276139
ENSG00000101577	LPIN2	0.339592	0.367154	0.210906	0.0899458
ENSG00000167702	KIFC2	0.339543	0.821168	0.357724	0.185343
ENSG00000115504	EHBP1	0.339292	0	0.248645	0
ENSG00000058404	CAMK2B	0.339116	0.783759	0.402726	0
ENSG00000164509	IL31RA	0.339102	0	0	0
ENSG00000163590	PPM1L	0.339014	0.443057	0	0.372252
ENSG00000091844	RGS17	0.338913	0.50487	0.597004	0
ENSG00000164877	MICALL2	0.338874	0	0	0
ENSG00000013561	RNF14	0.338784	0.337115	0.356093	0.0972154
ENSG00000106524	ANKMY2	0.338538	0.316195	0.16981	0
ENSG00000143554	SLC27A3	0.338316	0	0.301379	0
ENSG00000186472	PCLO	0.33823	0.319756	0.416547	0
ENSG00000113532	ST8SIA4	0.337655	0	0	0.574872
ENSG00000152784	PRDM8	0.337158	0	0.0841785	0.919515
ENSG00000135144	DTX1	0.33713	0.0254274	0.132665	0
ENSG00000165891	E2F7	0.336854	0.364911	0	0
ENSG00000167964	RAB26	0.336846	0.93207	0.126339	0
ENSG00000183060	LYSMD4	0.336838	0.251989	0.327632	0
ENSG00000151778	SERP2	0.336318	0.330846	0.40178	0.145885
ENSG00000105928	DFNA5	0.33618	0.314305	0.149391	0
ENSG00000167900	TK1	0.336014	0	0	0
ENSG00000182636	NDN	0.335921	0.0727208	0.341588	0.206259
ENSG00000132623	ANKEF1	0.335892	0	0	0
ENSG00000125821	DTD1	0.335617	0.17208	0.266765	0.035239
ENSG00000141424	SLC39A6	0.335436	0	0.220022	0
ENSG00000113638	TTC33	0.335315	0	0.168208	0
ENSG00000196440	ARMCX4	0.335292	0	0.374921	0
ENSG00000167600	CYP2S1	0.335106	0.790844	0	0
ENSG00000157193	LRP8	0.33509	0	0.0863561	0.0622895
ENSG00000111181	SLC6A12	0.334899	0	0	0
ENSG00000140015	KCNH5	0.334762	0.891205	0	0.906961
ENSG00000167280	ENGASE	0.33463	0	0	0
ENSG00000091972	CD200	0.334591	0.411628	0.47233	0
ENSG00000145075	CCDC39	0.334487	0	0.062641	0
ENSG00000187094	CCK	0.334445	0	0.942088	0.952346
ENSG00000180817	PPA1	0.334211	0.0631054	0.486489	0.172129
ENSG00000155980	KIF5A	0.333991	0.52657	0.25044	0.133687
ENSG00000124116	WFDC3	0.33398	0.401903	0	0.177771
ENSG00000136653	NA	0.333751	0.669386	0.394569	0
ENSG00000136026	CKAP4	0.333692	0	0.520841	0.144824
ENSG00000050165	3	0.333633	0	0.752564	0.260654
ENSG00000134285	FKBP11	0.333259	0	0	0
ENSG00000112208	BAG2	0.333094	0	0.0446549	0
ENSG00000072315	TRPC5	0.332886	0	0.328864	0
ENSG00000198055	GRK6	0.332876	0	0.0835638	0.268647
ENSG00000132016	C19orf57	0.332798	0	0	0
ENSG00000138640	FAM13A	0.332613	0	0.300132	0.201288
ENSG00000070950	RAD18	0.332558	0.0315375	0.122688	0
ENSG00000104427	ZC2HC1A	0.332541	0.222344	0.272965	0.0146624
ENSG00000176542	USF3	0.332482	0	0	0.140775
ENSG00000160408	ST6GALNAC6	0.33232	0.334364	0	0.423475
ENSG00000213066	FGFR1OP	0.332263	0	0.0316306	0
ENSG00000213190	MLLT11	0.332179	0.408527	0.350464	0.0946279
ENSG00000152092	ASTN1	0.331889	0.424778	0.306023	0
ENSG00000036530	CYP46A1	0.331267	0.898598	0.239185	0
ENSG00000165704	HPRT1	0.330732	0.208398	0.445083	0.185929
ENSG00000143473	KCNH1	0.330414	0.761769	0.572381	0
ENSG00000125772	GPCPD1	0.330368	0	0	0
ENSG00000184350	MRGPRE	0.330344	0.0837223	0.766335	0
ENSG00000164512	ANKRD55	0.330242	0.674792	0.413321	0
ENSG00000204310	AGPAT1	0.329666	0.176592	0.154132	0
ENSG00000184261	KCNK12	0.329571	0	0	0.0929925
ENSG00000067369	TP53BP1	0.329561	0.0561254	0.412804	0
ENSG00000086289	EPDR1	0.329547	0.346377	0	0
ENSG00000174007	CEP19	0.329364	0.0624644	0.399406	0
ENSG00000171298	GAA	0.32923	0.388335	0.424523	0
ENSG00000128581	IFT22	0.32899	0	0.0474766	0
ENSG00000215217	C5orf49	0.328929	0.473059	0.289963	0
ENSG00000100330	MTMR3	0.328755	0.153468	0.0647748	0
ENSG00000110811	P3H3	0.328727	0	0.380316	0
ENSG00000118058	KMT2A	0.328709	0	0.429736	0
ENSG00000166401	SERPINB8	0.328462	0	0	0
ENSG00000205978	NYNRIN	0.328418	0	0.0486605	0
ENSG00000116885	OSCP1	0.328204	0.426471	0.288955	0
ENSG00000181619	GPR135	0.328181	0.468944	0	0.429658
ENSG00000187189	TSPYL4	0.327991	0.429065	0.387591	0.198127
ENSG00000183833	MAATS1	0.327539	0	0	0
ENSG00000080503	SMARCA2	0.327397	0.218866	0	0
ENSG00000135631	RAB11FIP5	0.327355	0.424501	0.309436	0
ENSG00000067798	NAV3	0.327005	0.341108	0.301427	0
ENSG00000144229	THSD7B	0.32678	0.214655	0.0380582	0
ENSG00000115216	NRBP1	0.326672	0.104387	0.223393	0.24153
ENSG00000204442	FAM155A	0.326457	0.523852	0.290439	0
ENSG00000078061	ARAF	0.326395	0.223696	0.356116	0.197634
ENSG00000162755	KLHDC9	0.326107	0	0.669134	0
ENSG00000160710	ADAR	0.325987	0.357572	0.493002	0
ENSG00000144834	TAGLN3	0.325902	0.40063	0.346167	0.212543
ENSG00000060982	BCAT1	0.325725	0.494221	0.762371	0.12309
ENSG00000176884	GRIN1	0.325378	0.890878	0.570974	0
ENSG00000196323	ZBTB44	0.325302	0	0	0
ENSG00000111674	ENO2	0.325041	0.632065	0.437394	0
ENSG00000002746	HECW1	0.324976	0.941149	0.644269	0.151194
ENSG00000128266	GNAZ	0.324939	0.0558405	0.415628	0.0332676
ENSG00000161664	ASB16	0.324876	0.218301	0.665943	0
ENSG00000005448	WDR54	0.324841	0	0.212221	0
ENSG00000132024	CC2D1A	0.324728	0.027453	0.374089	0
ENSG00000130779	CLIP1	0.324604	0.20758	0.302748	0
ENSG00000130731	METTL26	0.324508	0	0.283497	0
ENSG00000156687	UNC5D	0.324482	0	0	0
ENSG00000173166	RAPH1	0.324455	0.0766838	0.301149	0.687604
ENSG00000167995	BEST1	0.324415	0	0.0285859	0
ENSG00000138162	TACC2	0.323375	0.142706	0.294114	0.0755298
ENSG00000171812	COL8A2	0.3233	0	0	0
ENSG00000085788	DDHD2	0.323299	0.294104	0.199478	0
ENSG00000135315	CEP162	0.323154	0	0	0
ENSG00000099814	CEP170B	0.322884	0.295981	0.336261	0
ENSG00000189127	ANKRD34B	0.322708	0.805288	0.854873	0.0898226
ENSG00000070669	ASNS	0.322645	0.657393	0.291989	0.175826
ENSG00000185386	MAPK11	0.322556	0	0.286711	0
ENSG00000143365	RORC	0.322055	0	0	0
ENSG00000090661	CERS4	0.322042	0.175391	0.394503	0.139478
ENSG00000118004	COLEC11	0.321926	0	0	0
ENSG00000204278	TMEM235	0.321851	0	0	0
ENSG00000155511	GRIA1	0.321727	0.697569	0	0
ENSG00000168612	ZSWIM1	0.321528	0	0.230427	0
ENSG00000119865	CNRIP1	0.321466	0.266166	0.261974	0.18519
ENSG00000175175	PPM1E	0.321339	0.504815	0.314097	0.616683
ENSG00000155265	GOLGA7B	0.321231	0.592823	0.381432	0.874284
ENSG00000187033	SAMD7	0.321099	0.627686	0	0
ENSG00000165259	HDX	0.320929	0	0.00513081	0.19281
ENSG00000070019	GUCY2C	0.320688	0	0	0
ENSG00000183715	OPCML	0.320422	0.714895	0.170857	0.334983
ENSG00000154001	PPP2R5E	0.320377	0.0271368	0.574162	0.0772548
ENSG00000101098	RIMS4	0.32034	0.534604	0.640938	0.115388
ENSG00000139190	VAMP1	0.320282	0.795447	0.400525	0
ENSG00000130226	DPP6	0.320066	0.501406	0.424265	0
ENSG00000100445	SDR39U1	0.319819	0	0.504172	0.278375
ENSG00000148408	CACNA1B	0.31948	0.589352	0.41521	0.0632085
ENSG00000123607	TTC21B	0.319391	0	0	0
ENSG00000171951	SCG2	0.31939	0.309085	0.103437	0.226959
ENSG00000099625	CBARP	0.319358	0	0.407705	0
ENSG00000137817	PARP6	0.319315	0.457268	0.354682	0
ENSG00000126947	ARMCX1	0.319171	0.0902422	0.389085	0.175209
ENSG00000161082	CELF5	0.319041	0.416119	0.407791	0
ENSG00000163950	SLBP	0.319024	0	0.168809	0.116067
ENSG00000162433	AK4	0.318796	0.688126	0.244746	0
ENSG00000184368	MAP7D2	0.318729	0.386776	0.417572	0.1879
ENSG00000134698	AGO4	0.318513	0	0	0
ENSG00000107872	FBXL15	0.318483	0.123592	0.274734	0.00147856
ENSG00000163935	SFMBT1	0.318405	0	0.601827	0
ENSG00000101442	ACTR5	0.318368	0	0	0
ENSG00000253368	TRNP1	0.317836	0	0.646242	0.69758
ENSG00000100344	PNPLA3	0.317773	0.660732	0.0973726	0.595209
ENSG00000261787	TCF24	0.317511	0	0	0
ENSG00000165186	PTCHD1	0.317481	0	0.836862	0.778225
ENSG00000137824	RMDN3	0.317479	0.0675214	0.081692	0
ENSG00000142178	SIK1	0.317245	0	0.108198	0
ENSG00000078053	AMPH	0.317211	0.26804	0.439347	0
ENSG00000100271	TTLL1	0.31712	0.0304843	0.168763	0
ENSG00000211450	SELENOH	0.316977	0	0.304083	0.275179
ENSG00000080189	SLC35C2	0.31663	0.314502	0.0426061	0
ENSG00000166619	BLCAP	0.316178	0.349279	0.394213	0
ENSG00000117533	VAMP4	0.316132	0.00441595	0.128737	0.0757762
ENSG00000164442	CITED2	0.316118	0.196124	0.451673	0.405282
ENSG00000145495	2020-03-06	0.316088	0.197321	0.334359	0
ENSG00000029153	ARNTL2	0.316075	0.462698	0.0303338	0
ENSG00000100346	CACNA1I	0.316047	0.759708	0.239863	0
ENSG00000167131	CCDC103	0.315839	0	0	0
ENSG00000128881	TTBK2	0.315444	0.0141026	0.399561	0
ENSG00000157895	C12orf43	0.315434	0.191738	0.382806	0.0145392
ENSG00000113648	H2AFY	0.3153	0	0.31917	0.153524
ENSG00000146005	PSD2	0.315078	0	0.313983	0
ENSG00000135002	RFK	0.314888	0	0.213198	0
ENSG00000074696	HACD3	0.314859	0.202632	0.310793	0
ENSG00000165152	TMEM246	0.314783	0.290246	0.287653	0
ENSG00000168959	GRM5	0.314704	0.952275	0.579534	0.267142
ENSG00000094916	CBX5	0.314627	0.148647	0.167369	0
ENSG00000167799	NUDT8	0.314296	0	0	0
ENSG00000166260	COX11	0.314157	0.0383452	0.281152	0
ENSG00000124532	MRS2	0.314142	0	0	0
ENSG00000160325	CACFD1	0.31411	0.128249	0.0793072	0
ENSG00000135127	BICDL1	0.314092	0	0	0.339234
ENSG00000156735	BAG4	0.313945	0.320905	0.337774	0
ENSG00000177542	SLC25A22	0.313723	0.667397	0.2828	0
ENSG00000188542	DUSP28	0.313396	0	0.289535	0.128512
ENSG00000182319	NA	0.313381	0	0	0
ENSG00000054967	RELT	0.313359	0.498852	0	0.0314194
ENSG00000142611	PRDM16	0.312987	0.161576	0.0200722	0
ENSG00000172795	DCP2	0.312755	0	0.365021	0
ENSG00000151276	MAGI1	0.312543	0.705681	0	0
ENSG00000211456	SACM1L	0.312401	0.0213675	0.521006	0.201891
ENSG00000165434	PGM2L1	0.312366	0.824262	0.564894	0
ENSG00000175264	CHST1	0.312107	0.773107	0.347498	0.185313
ENSG00000072832	CRMP1	0.312094	0.612772	0.569129	0.0973386
ENSG00000126790	L3HYPDH	0.311984	0	0.426993	0
ENSG00000064607	SUGP2	0.311861	0.27532	0.281979	0
ENSG00000188266	HYKK	0.311837	0	0	0.0544526
ENSG00000205726	ITSN1	0.311654	0	0.222475	0
ENSG00000196923	PDLIM7	0.31136	0.355345	0.22699	0
ENSG00000110697	PITPNM1	0.311248	0.277153	0.255066	0.132454
ENSG00000123570	RAB9B	0.311164	0.677443	0.299682	0
ENSG00000148219	ASTN2	0.31012	0.68251	0.6388	0.417461
ENSG00000143324	XPR1	0.310108	0.0125356	0.266312	0
ENSG00000184305	CCSER1	0.310101	0	0.318033	0
ENSG00000198265	HELZ	0.309692	0.0382479	0.209666	0.0627156
ENSG00000089685	BIRC5	0.309248	0	0	0
ENSG00000170091	HGNC:24955	0.309134	0.645854	0.437568	0.197265
ENSG00000168528	SERINC2	0.309098	0	0	0
ENSG00000102879	CORO1A	0.308997	0.653863	0.165775	0.0248891
ENSG00000171612	SLC25A33	0.308958	0.0450973	0.261198	0.0879744
ENSG00000007264	MATK	0.308811	0.803756	0.423229	0.0890833
ENSG00000176406	RIMS2	0.308767	0.271044	0.0814727	0
ENSG00000011347	SYT7	0.30837	0.908182	0.710941	0.819713
ENSG00000196227	FAM217B	0.308247	0.66591	0.47526	0
ENSG00000178567	EPM2AIP1	0.308174	0.350414	0.312866	0
ENSG00000035687	ADSS	0.308054	0.135091	0.355153	0.106087
ENSG00000135040	NAA35	0.308003	0	0.0980758	0
ENSG00000138134	STAMBPL1	0.30791	0.327679	0	0.0910547
ENSG00000108094	CUL2	0.307821	0.25104	0.0886198	0
ENSG00000106992	AK1	0.3078	0.10254	0.115614	0
ENSG00000255529	POLR2M	0.307695	0.0621083	0.242209	0.106456
ENSG00000187860	CCDC157	0.307598	0.122292	0	0
ENSG00000204052	LRRC73	0.307561	0.157611	0.283693	0
ENSG00000188130	MAPK12	0.307559	0	0.143585	0
ENSG00000165516	KLHDC2	0.307483	0.171659	0.204889	0.0475604
ENSG00000111224	PARP11	0.307483	0	0.30549	0
ENSG00000170027	YWHAG	0.30727	0.478814	0.333466	0.164983
ENSG00000069966	GNB5	0.30724	0	0	0
ENSG00000182866	LCK	0.307055	0	0.124493	0
ENSG00000115977	AAK1	0.306895	0.771294	0.40497	0.216953
ENSG00000243449	C4orf48	0.306805	0	0.361546	0
ENSG00000154783	FGD5	0.306732	0	0.247497	0
ENSG00000171735	CAMTA1	0.306673	0.459617	0.332239	0
ENSG00000131149	GSE1	0.306602	0	0.339643	0
ENSG00000080298	RFX3	0.30643	0	0	0
ENSG00000183421	RIPK4	0.306366	0	0	0.861654
ENSG00000244588	RAD21L1	0.30618	0	0	0
ENSG00000101079	NDRG3	0.306165	0.401519	0.379333	0.119763
ENSG00000065882	TBC1D1	0.3059	0	0	0
ENSG00000157077	ZFYVE9	0.305853	0.448604	0.26579	0
ENSG00000146281	PM20D2	0.305824	0	0	0
ENSG00000161609	CCDC155	0.305716	0	0	0
ENSG00000178149	DALRD3	0.305577	0	0.224198	0
ENSG00000087470	DNM1L	0.305295	0.245812	0.362785	0.16067
ENSG00000132570	PCBD2	0.30523	0	0.120235	0
ENSG00000173418	NAA20	0.305201	0.19717	0.229472	0.186545
ENSG00000198522	GPN1	0.304631	0	0.134723	0
ENSG00000079156	OSBPL6	0.304591	0.342202	0.312082	0.131886
ENSG00000185482	STAC3	0.304464	0	0.90936	0
ENSG00000167981	ZNF597	0.304389	0	0	0
ENSG00000142168	SOD1	0.304091	0	0.272041	0
ENSG00000158402	CDC25C	0.303901	0	0	0
ENSG00000174599	TRAM1L1	0.303871	0.134687	0.206779	0
ENSG00000154277	UCHL1	0.303774	0.272876	0.383951	0.155495
ENSG00000198912	C1orf174	0.303743	0	0	0
ENSG00000183077	AFMID	0.303628	0	0	0
ENSG00000197381	ADARB1	0.30359	0.615083	0.550182	0.0373337
ENSG00000075340	ADD2	0.303034	0.767159	0.583385	0.137013
ENSG00000141622	RNF165	0.303009	0.620924	0.285047	0
ENSG00000097046	CDC7	0.302875	0.286739	0.271343	0
ENSG00000139921	TMX1	0.302872	0.0316239	0.265397	0
ENSG00000182771	GRID1	0.302854	0.0393162	0.884833	0
ENSG00000166923	GREM1	0.302844	0	0	0.0158768
ENSG00000185883	ATP6V0C	0.30283	0	0	0
ENSG00000166793	YPEL4	0.302809	0.281846	0.370145	0.0473139
ENSG00000179915	NRXN1	0.302755	0.466906	0.388377	0.200222
ENSG00000074071	MRPS34	0.302751	0	0.355889	0.0340069
ENSG00000163618	CADPS	0.302672	0.466736	0.422762	0.284098
ENSG00000143850	PLEKHA6	0.302566	0.211372	0.582916	0.100648
ENSG00000176401	EID2B	0.302456	0	0.151441	0.0304337
ENSG00000115750	TAF1B	0.302408	0.0930098	0.0848529	0
ENSG00000164070	HSPA4L	0.30238	0.129843	0.53753	0.190118
ENSG00000142082	SIRT3	0.302376	0.0835833	0.213405	0.102021
ENSG00000073670	ADAM11	0.30233	0.863649	0.476	0.147367
ENSG00000198934	MAGEE1	0.302303	0.41277	0.495029	0.0533514
ENSG00000145198	VWA5B2	0.302042	0.788489	0.523845	0
ENSG00000147364	FBXO25	0.301964	0.349849	0.174538	0
ENSG00000259494	MRPL46	0.301574	0.0295584	0.126409	0.0914243
ENSG00000101210	EEF1A2	0.301257	0.37376	0.375762	0.209709
ENSG00000134532	SOX5	0.301253	0	0.80512	0
ENSG00000163624	CDS1	0.301161	0.411863	0.340817	0
ENSG00000139200	PIANP	0.301102	0.515482	0.535049	0
ENSG00000198440	ZNF583	0.301098	0	0.242984	0
ENSG00000180398	MCFD2	0.301044	0.28901	0.262091	0
ENSG00000123908	AGO2	0.30098	0.101337	0.382073	0
ENSG00000107758	PPP3CB	0.300137	0.535719	0.414686	0
ENSG00000170266	GLB1	0.300047	0	0	0
ENSG00000180488	MIGA1	0.299772	0	0.291818	0
ENSG00000119906	SLF2	0.299599	0	0.347833	0
ENSG00000166689	PLEKHA7	0.299561	0	0.395233	0
ENSG00000101152	DNAJC5	0.299431	0.300703	0.327348	0
ENSG00000172247	C1QTNF4	0.299378	0.207491	0.424754	0
ENSG00000101333	PLCB4	0.299032	0.68755	0	0.878455
ENSG00000181754	AMIGO1	0.298997	0.00219637	0.560043	0
ENSG00000066933	MYO9A	0.298757	0.14141	0.358044	0
ENSG00000174516	PELI3	0.298743	0.190483	0.549356	0
ENSG00000132463	GRSF1	0.298734	0.00512821	0.377885	0.0431247
ENSG00000159685	CHCHD6	0.298658	0.102564	0.362462	0
ENSG00000160191	PDE9A	0.298611	0	0.214154	0
ENSG00000134874	DZIP1	0.298294	0	0.315628	0
ENSG00000197362	ZNF786	0.29791	0	0	0.438412
ENSG00000168079	SCARA5	0.297761	0.0599393	0	0
ENSG00000178338	ZNF354B	0.297462	0	0	0
ENSG00000104524	PYCR3	0.297413	0	0.0591185	0
ENSG00000182093	WRB	0.297043	0.115028	0.374524	0
ENSG00000055044	NOP58	0.296949	0.114387	0.314862	0
ENSG00000132639	SNAP25	0.296335	0.601239	0.391582	0.241868
ENSG00000120256	LRP11	0.296289	0.311802	0.421609	0.22573
ENSG00000165533	TTC8	0.296273	0	0.00197339	0
ENSG00000135541	AHI1	0.296157	0.35828	0.368165	0
ENSG00000034239	EFCAB1	0.296128	0	0	0
ENSG00000159593	NAE1	0.295889	0	0.293386	0
ENSG00000109103	UNC119	0.29588	0	0.410004	0
ENSG00000118965	WDR35	0.295701	0.041453	0.228212	0
ENSG00000076685	NT5C2	0.295529	0.0160969	0.0521295	0
ENSG00000067113	PLPP1	0.295414	0	0.0456134	0
ENSG00000109339	MAPK10	0.29539	0.443436	0.564611	0.179768
ENSG00000117461	PIK3R3	0.295078	0	0.233222	0.0878512
ENSG00000173926	2020-03-03	0.295078	0	0	0.723551
ENSG00000181378	CFAP65	0.294841	0	0	0
ENSG00000186838	SELENOV	0.294524	0	0.853809	0.64672
ENSG00000165209	STRBP	0.294247	0.204286	0.549806	0.355019
ENSG00000108176	DNAJC12	0.294158	0	0.165043	0
ENSG00000185053	SGCZ	0.293992	0.705018	0	0
ENSG00000173261	PLAC8L1	0.293836	0.586444	0	0
ENSG00000090316	MAEA	0.293794	0	0.301192	0
ENSG00000163875	MEAF6	0.293666	0.242631	0.228609	0
ENSG00000139835	GRTP1	0.293244	0	0	0.695643
ENSG00000178662	CSRNP3	0.293227	0.42056	0.618454	0
ENSG00000198520	C1orf228	0.293016	0	0	0
ENSG00000219545	UMAD1	0.293006	0.225751	0.328926	0
ENSG00000130643	CALY	0.29298	0.473934	0.429954	0.120996
ENSG00000068024	HDAC4	0.292967	0	0	0
ENSG00000128965	CHAC1	0.292629	0	0.617861	0
ENSG00000180228	PRKRA	0.292578	0	0	0
ENSG00000146215	CRIP3	0.292494	0	0	0
ENSG00000127125	PPCS	0.292467	0	0.138899	0.0574174
ENSG00000181773	GPR3	0.292323	0	0.781131	0.411413
ENSG00000183309	ZNF623	0.292159	0	0	0
ENSG00000055118	KCNH2	0.292108	0	0.645703	0.331603
ENSG00000101019	UQCC1	0.292015	0	0.593529	0.137753
ENSG00000065268	WDR18	0.291877	0.0605413	0.164596	0
ENSG00000136381	IREB2	0.291628	0	0.0964955	0
ENSG00000150681	RGS18	0.291351	0	0	0
ENSG00000111203	ITFG2	0.291226	0	0.259148	0
ENSG00000118557	PMFBP1	0.291136	0	0	0
ENSG00000170011	MYRIP	0.290934	0.717022	0.0135882	0
ENSG00000124104	SNX21	0.290895	0	0.0743015	0
ENSG00000122512	PMS2	0.290818	0	0	0
ENSG00000162779	AXDND1	0.290774	0	0	0
ENSG00000171703	TCEA2	0.290771	0	0.0003263	0
ENSG00000181789	COPG1	0.290512	0.269201	0.367122	0.159438
ENSG00000155974	GRIP1	0.290505	0	0.00668915	0
ENSG00000143502	SUSD4	0.290435	0.820855	0.266282	0
ENSG00000107742	SPOCK2	0.290369	0.452302	0.399614	0.201084
ENSG00000143740	SNAP47	0.28998	0.352528	0.376186	0.00813208
ENSG00000167858	TEKT1	0.289865	0	0	0
ENSG00000104723	TUSC3	0.289837	0.315035	0.327815	0.121981
ENSG00000067057	PFKP	0.289633	0.607797	0.39588	0.332682
ENSG00000197969	VPS13A	0.289579	0.479884	0	0
ENSG00000107295	SH3GL2	0.289502	0.737085	0.403964	0
ENSG00000130511	SSBP4	0.289475	0.11147	0.418038	0
ENSG00000145214	DGKQ	0.289402	0.211983	0.57006	0
ENSG00000159733	ZFYVE28	0.289313	0.743037	0.177576	0
ENSG00000107623	NA	0.289116	0.319635	0	0
ENSG00000155744	FAM126B	0.288601	0.483076	0.475617	0
ENSG00000162378	ZYG11B	0.288568	0.529277	0.266715	0
ENSG00000198513	ATL1	0.288394	0.551644	0.49162	0
ENSG00000197535	MYO5A	0.288193	0.425597	0.401507	0.279092
ENSG00000112984	KIF20A	0.288061	0	0	0.279712
ENSG00000171862	PTEN	0.287974	0	0.243246	0
ENSG00000162188	GNG3	0.287734	0.227122	0.368189	0.200468
ENSG00000114841	DNAH1	0.287714	0	0	0
ENSG00000166887	VPS39	0.287709	0.178686	0.260485	0
ENSG00000132423	COQ3	0.287684	0.0620817	0.153669	0
ENSG00000143153	ATP1B1	0.287609	0.42447	0.427111	0.241991
ENSG00000107242	PIP5K1B	0.287514	0	0	0.0484229
ENSG00000116918	TSNAX	0.287438	0.168464	0.280615	0.128635
ENSG00000184867	ARMCX2	0.287418	0.226733	0.17682	0.0263677
ENSG00000166126	AMN	0.287379	0.605569	0	0
ENSG00000181191	PJA1	0.287054	0.313936	0.366199	0
ENSG00000142484	TM4SF5	0.286977	0.371666	0.19674	0
ENSG00000196449	YRDC	0.28683	0	0.192682	0.134549
ENSG00000160963	COL26A1	0.28645	0.280194	0	0
ENSG00000091483	FH	0.286373	0.223886	0.171837	0.114835
ENSG00000163481	RNF25	0.286236	0.235075	0.542109	0
ENSG00000099139	PCSK5	0.286146	0	0	0
ENSG00000250479	CHCHD10	0.286005	0.320222	0.270586	0.203549
ENSG00000179918	SEPHS2	0.285788	0	0.135709	0.0230409
ENSG00000136928	GABBR2	0.285642	0.893207	0.335015	0
ENSG00000177302	TOP3A	0.285535	0	0	0
ENSG00000100359	SGSM3	0.285392	0.202148	0.354906	0
ENSG00000196199	MPHOSPH8	0.28531	0.0871795	0.00565586	0
ENSG00000103034	NDRG4	0.285051	0.554463	0.427929	0.232257
ENSG00000156959	LHFPL4	0.284677	0.579885	0.489769	0.125062
ENSG00000144362	PHOSPHO2	0.284505	0	0.117111	0
ENSG00000159322	ADPGK	0.284458	0.179233	0	0
ENSG00000167257	RNF214	0.284171	0.0551994	0.358735	0.0579103
ENSG00000102531	FNDC3A	0.283979	0	0.0206113	0
ENSG00000101104	PABPC1L	0.283747	0	0	0
ENSG00000148356	LRSAM1	0.283692	0	0.582594	0.293012
ENSG00000114127	XRN1	0.283578	0	0.174129	0
ENSG00000156475	PPP2R2B	0.283482	0.146856	0.406548	0.179522
ENSG00000095397	WHRN	0.283375	0.622529	0	0
ENSG00000133800	LYVE1	0.283047	0.130311	0	0.0154278
ENSG00000101654	RNMT	0.283018	0.0888889	0.227456	0
ENSG00000119946	CNNM1	0.283015	0.848183	0.6383	0
ENSG00000136143	SUCLA2	0.283004	0.223629	0.402982	0.199975
ENSG00000140092	FBLN5	0.282685	0	0	0
ENSG00000197457	STMN3	0.282545	0.470723	0.393282	0.237679
ENSG00000135454	B4GALNT1	0.282275	0.615646	0.333112	0.130853
ENSG00000170085	SIMC1	0.282205	0.144964	0.0900793	0
ENSG00000189184	PCDH18	0.282156	0.624735	0.386789	0
ENSG00000162426	SLC45A1	0.28215	0.478047	0.376053	0.0929029
ENSG00000099364	FBXL19	0.281853	0	0.423452	0
ENSG00000169217	CD2BP2	0.281748	0	0.194048	0
ENSG00000205220	PSMB10	0.281562	0	0.248359	0
ENSG00000154548	SRSF12	0.281451	0	0.549001	0
ENSG00000088682	COQ9	0.281365	0.0264245	0.106584	0
ENSG00000135835	KIAA1614	0.281145	0	0	0
ENSG00000204856	FAM216A	0.281035	0	0.364723	0
ENSG00000182108	DEXI	0.281006	0	0.356686	0.125924
ENSG00000196453	ZNF777	0.281004	0	0	0
ENSG00000181027	FKRP	0.280938	0	0.235293	0.134056
ENSG00000104983	CCDC61	0.280854	0	0.0467411	0
ENSG00000137267	TUBB2A	0.280825	0.370758	0.368353	0.220059
ENSG00000125895	TMEM74B	0.280644	0	0.403863	0
ENSG00000146151	HMGCLL1	0.280623	0	0.11845	0
ENSG00000174871	CNIH2	0.280581	0.0925214	0.314994	0.203302
ENSG00000153815	CMIP	0.280521	0.368755	0.251362	0
ENSG00000118402	ELOVL4	0.280483	0.744155	0.223834	0
ENSG00000143033	MTF2	0.280468	0.00612536	0.155269	0
ENSG00000205111	CDKL4	0.280349	0	0	0
ENSG00000144619	CNTN4	0.280071	0.765843	0	0.801441
ENSG00000130477	UNC13A	0.279781	0.571271	0.485618	0.093519
ENSG00000077254	USP33	0.279454	0.516052	0.385452	0
ENSG00000130054	FAM155B	0.279007	0.234749	0	0
ENSG00000166676	TVP23A	0.278835	0	0.2944	0
ENSG00000184277	TM2D3	0.278804	0.162035	0.263871	0
ENSG00000174233	ADCY6	0.278787	0.169359	0	0
ENSG00000159082	SYNJ1	0.278669	0.402465	0.453131	0
ENSG00000142892	PIGK	0.278656	0.205857	0.256811	0
ENSG00000139597	N4BP2L1	0.278473	0	0.292664	0
ENSG00000082805	ERC1	0.278365	0	0.0538158	0
ENSG00000085721	RRN3	0.278177	0.0297721	0.472889	0
ENSG00000151470	C4orf33	0.277968	0	0.375747	0
ENSG00000156170	NDUFAF6	0.277941	0.218011	0	0
ENSG00000166411	IDH3A	0.277709	0.323027	0.350584	0.15722
ENSG00000065154	OAT	0.277604	0	0.167141	0
ENSG00000116191	RALGPS2	0.277297	0	0	0
ENSG00000240720	LRRD1	0.277168	0	0	0
ENSG00000172020	GAP43	0.277104	0.433923	0.302764	0
ENSG00000107669	ATE1	0.277019	0.145228	0.244702	0
ENSG00000130413	STK33	0.276931	0	0	0
ENSG00000101220	C20orf27	0.276929	0.122792	0.451049	0
ENSG00000055813	CCDC85A	0.276769	0.0661536	0.337911	0
ENSG00000143126	CELSR2	0.27676	0.789312	0.378466	0.111262
ENSG00000117602	RCAN3	0.276644	0	0.0267662	0
ENSG00000111802	TDP2	0.276625	0	0	0.0559389
ENSG00000163389	POGLUT1	0.276621	0.140896	0.0907429	0
ENSG00000134443	GRP	0.276599	0	0	0
ENSG00000110786	PTPN5	0.276382	0.722391	0.530316	0
ENSG00000232119	MCTS1	0.27638	0.269326	0.251374	0
ENSG00000156113	KCNMA1	0.276363	0.552165	0.650927	0
ENSG00000134755	DSC2	0.276132	0.251462	0	0
ENSG00000158526	TSR2	0.275748	0	0.443759	0
ENSG00000155816	FMN2	0.27574	0.0108974	0.186704	0.0845244
ENSG00000213088	ACKR1	0.275694	0.912906	0.305343	0
ENSG00000174373	RALGAPA1	0.275491	0.00391738	0.520488	0
ENSG00000196177	ACADSB	0.275444	0.0638889	0.190429	0
ENSG00000136546	SCN7A	0.275381	0	0	0
ENSG00000074054	CLASP1	0.275087	0	0.182774	0
ENSG00000139131	YARS2	0.274928	0	0.531655	0
ENSG00000184828	ZBTB7C	0.274919	0.393254	0.125451	0
ENSG00000183831	ANKRD45	0.274804	0.0974001	0.309574	0
ENSG00000092200	RPGRIP1	0.274712	0	0.191674	0
ENSG00000110172	CHORDC1	0.274674	0	0.0976706	0
ENSG00000184402	SS18L1	0.274641	0	0.539979	0
ENSG00000166402	TUB	0.274559	0.228688	0.401243	0
ENSG00000130489	SCO2	0.274509	0.218344	0.208	0.0653031
ENSG00000100478	AP4S1	0.274489	0.0914182	0.245026	0.146254
ENSG00000164972	C9orf24	0.274403	0.0371775	0	0
ENSG00000203666	EFCAB2	0.274378	0	0.0700244	0
ENSG00000180190	TDRP	0.274096	0	0	0
ENSG00000136021	SCYL2	0.274056	0.12912	0.0750064	0
ENSG00000122386	ZNF205	0.273936	0	0	0
ENSG00000143127	ITGA10	0.273678	0	0	0
ENSG00000176410	DNAJC30	0.273644	0.330532	0	0
ENSG00000081377	CDC14B	0.273493	0	0.189995	0
ENSG00000151693	ASAP2	0.273249	0	0.127581	0.313106
ENSG00000103723	AP3B2	0.273228	0.152106	0.298268	0.0535978
ENSG00000100124	ANKRD54	0.273177	0	0	0
ENSG00000116641	DOCK7	0.27317	0	0.337203	0
ENSG00000173715	C11orf80	0.272964	0	0	0.301453
ENSG00000128739	SNRPN	0.272951	0.804721	0.510649	0
ENSG00000175931	UBE2O	0.272686	0.448637	0.409953	0
ENSG00000072954	TMEM38A	0.272536	0.151675	0.133722	0.106703
ENSG00000197121	PGAP1	0.272406	0.180599	0.361085	0
ENSG00000150275	PCDH15	0.272331	0.21679	0	0
ENSG00000168824	HGNC:18790	0.272188	0.536763	0.439932	0.189625
ENSG00000135999	EPC2	0.272031	0.0170228	0	0.2125
ENSG00000117020	AKT3	0.271943	0.0433845	0	0
ENSG00000184117	NIPSNAP1	0.271894	0.25335	0.357567	0.151183
ENSG00000165283	STOML2	0.271648	0	0.283996	0
ENSG00000154096	THY1	0.271448	0.94669	0.434489	0.26912
ENSG00000163444	TMEM183A	0.271213	0	0.0690124	0
ENSG00000224531	SMIM13	0.271026	0.507563	0.277247	0
ENSG00000154814	OXNAD1	0.270788	0	0	0.13021
ENSG00000147324	MFHAS1	0.270743	0.111673	0.115816	0.163319
ENSG00000148814	LRRC27	0.270738	0	0.291348	0
ENSG00000163814	CDCP1	0.270504	0.0650607	0	0
ENSG00000131067	GGT7	0.270468	0.735713	0.230047	0.0379497
ENSG00000130396	AFDN	0.270423	0	0	0
ENSG00000100575	TIMM9	0.270417	0.0469373	0.348642	0
ENSG00000039139	DNAH5	0.270412	0	0	0
ENSG00000033627	ATP6V0A1	0.270194	0.484772	0.326404	0.0410301
ENSG00000090863	GLG1	0.270168	0.278447	0.199218	0
ENSG00000122068	FYTTD1	0.270096	0.120655	0.385069	0
ENSG00000171204	TMEM126B	0.270094	0	0.534046	0
ENSG00000104497	SNX16	0.270016	0.373434	0.603457	0
ENSG00000171680	PLEKHG5	0.270003	0	0.0539485	0
ENSG00000166503	HDGFL3	0.269987	0	0.246245	0.080828
ENSG00000136758	YME1L1	0.26994	0.0797009	0.113913	0
ENSG00000162804	SNED1	0.269755	0	0	0
ENSG00000179862	CITED4	0.269556	0	0	0.354393
ENSG00000040933	INPP4A	0.269523	0.172931	0.398669	0.108797
ENSG00000126903	SLC10A3	0.269417	0	0	0
ENSG00000166783	MARF1	0.269102	0.072466	0.211731	0
ENSG00000151164	RAD9B	0.268898	0	0.0882386	0
ENSG00000177679	SRRM3	0.268838	0.237622	0.557283	0.16833
ENSG00000122490	PQLC1	0.268695	0	0.225468	0.351221
ENSG00000082269	FAM135A	0.268658	0	0	0.0154017
ENSG00000173581	CCDC106	0.268589	0.0563073	0.557802	0
ENSG00000103657	HERC1	0.268122	0.360746	0.33953	0
ENSG00000173226	IQCB1	0.267584	0.147324	0.275107	0
ENSG00000136052	SLC41A2	0.267452	0.175225	0.0225166	0
ENSG00000149179	C11orf49	0.267206	0.285328	0.144301	0
ENSG00000105982	RNF32	0.267024	0	0.0493911	0
ENSG00000197050	ZNF420	0.266984	0	0	0
ENSG00000140463	BBS4	0.266702	0.131798	0.506289	0.251189
ENSG00000128607	KLHDC10	0.266701	0.0556268	0.328052	0
ENSG00000082701	GSK3B	0.266652	0.141595	0.306162	0.184697
ENSG00000184194	GPR173	0.266543	0	0	0
ENSG00000166261	ZNF202	0.266537	0	0	0
ENSG00000173575	CHD2	0.266187	0	0.0786957	0.0862494
ENSG00000068745	IP6K2	0.266145	0	0.2132	0
ENSG00000077232	DNAJC10	0.266029	0.107194	0.419214	0
ENSG00000004776	HSPB6	0.266014	0	0	0
ENSG00000176956	LY6H	0.265937	0.432091	0.389403	0
ENSG00000182400	TRAPPC6B	0.265934	0	0.267017	0.0634549
ENSG00000118418	HMGN3	0.265925	0	0.00940831	0.207491
ENSG00000072062	PRKACA	0.265884	0.201774	0.415617	0.127033
ENSG00000155097	ATP6V1C1	0.265878	0.400568	0.365011	0.15414
ENSG00000163818	LZTFL1	0.265744	0.0978265	0.158664	0
ENSG00000188573	FBLL1	0.265636	0.265647	0.700096	0
ENSG00000148339	SLC25A25	0.265219	0	0.675683	0
ENSG00000169641	LUZP1	0.264991	0.195316	0.154024	0.238224
ENSG00000100350	FOXRED2	0.264959	0.275193	0.14838	0
ENSG00000108924	HLF	0.264921	0	0	0
ENSG00000108352	RAPGEFL1	0.264881	0.435468	0.573242	0
ENSG00000101247	NDUFAF5	0.264868	0.279038	0.381635	0.117792
ENSG00000102466	FGF14	0.26482	0.0228632	0.089278	0
ENSG00000164867	NOS3	0.264801	0	0	0
ENSG00000125450	NUP85	0.264642	0.0813178	0	0
ENSG00000009335	UBE3C	0.264628	0.250069	0.169954	0
ENSG00000103942	HOMER2	0.264254	0	0	0.93171
ENSG00000143643	TTC13	0.264216	0	0.0527729	0
ENSG00000078018	MAP2	0.263907	0.0915954	0.206307	0.175579
ENSG00000161179	YDJC	0.263633	0.210775	0.173311	0
ENSG00000106617	PRKAG2	0.263564	0.300585	0.276677	0
ENSG00000110888	CAPRIN2	0.263555	0	0.532337	0
ENSG00000115289	PCGF1	0.263286	0	0.000789355	0
ENSG00000187446	CHP1	0.263131	0.0011396	0.0857625	0
ENSG00000166900	STX3	0.262836	0	0.322401	0.616744
ENSG00000120925	RNF170	0.262563	0.152644	0.518083	0
ENSG00000114062	UBE3A	0.262469	0.20417	0.359341	0.197018
ENSG00000185950	IRS2	0.262466	0	0	0
ENSG00000147419	CCDC25	0.262412	0.101994	0.255678	0
ENSG00000151025	GPR158	0.262073	0.604307	0.388521	0.280193
ENSG00000121851	POLR3GL	0.26201	0	0.00552189	0.107565
ENSG00000197930	ERO1A	0.261866	0.00861823	0.133897	0
ENSG00000188343	FAM92A	0.261851	0.0481481	0.263268	0
ENSG00000177150	FAM210A	0.261763	0.012963	0.180368	0
ENSG00000185924	RTN4RL1	0.261547	0.441009	0.289538	0.867533
ENSG00000100228	RAB36	0.261386	0.00306268	0.182767	0
ENSG00000188674	C2orf80	0.261157	0.867185	0.107634	0
ENSG00000164211	STARD4	0.26115	0.39207	0	0
ENSG00000197774	EME2	0.261115	0	0	0
ENSG00000182993	C12orf60	0.260861	0	0	0.0495261
ENSG00000139974	SLC38A6	0.260787	0	0	0
ENSG00000204439	C6orf47	0.260732	0	0.429761	0
ENSG00000174576	NPAS4	0.260602	0	0.672719	0
ENSG00000112234	FBXL4	0.260583	0	0.352881	0
ENSG00000137218	FRS3	0.260391	0	0.182196	0
ENSG00000152969	JAKMIP1	0.260167	0	0.308091	0
ENSG00000204576	PRR3	0.26011	0	0.00239286	0
ENSG00000167100	SAMD14	0.259605	0	0.347222	0.570128
ENSG00000150593	PDCD4	0.259568	0	0.15748	0
ENSG00000125386	FAM193A	0.259395	0	0	0
ENSG00000091656	ZFHX4	0.259256	0	0.0039156	0.723664
ENSG00000188766	SPRED3	0.258792	0	0.474667	0.165927
ENSG00000108797	CNTNAP1	0.258675	0.92348	0.675168	0.21161
ENSG00000104290	FZD3	0.258556	0.327616	0.0726207	0
ENSG00000160999	SH2B2	0.258401	0	0.152064	0
ENSG00000011478	QPCTL	0.257907	0	0.152417	0
ENSG00000168484	SFTPC	0.257696	0.0366085	0	0
ENSG00000144711	IQSEC1	0.257608	0.212139	0.288869	0
ENSG00000116128	BCL9	0.257602	0	0.142063	0.202623
ENSG00000119777	TMEM214	0.257539	0.266574	0.0106047	0
ENSG00000155093	PTPRN2	0.257498	0.166664	0.420546	0
ENSG00000148426	PROSER2	0.257434	0.130943	0.0040568	0
ENSG00000007376	RPUSD1	0.257095	0.838684	0.141954	0
ENSG00000067829	IDH3G	0.256846	0.0467949	0.432753	0.150936
ENSG00000198707	CEP290	0.256589	0	0	0
ENSG00000157224	CLDN12	0.256197	0	0.200195	0
ENSG00000196123	KIAA0895L	0.256157	0	0.148099	0
ENSG00000087448	KLHL42	0.256138	0	0	0
ENSG00000211445	GPX3	0.256007	0.143376	0.383542	0
ENSG00000173230	GOLGB1	0.255963	0.0828348	0.297606	0
ENSG00000144635	DYNC1LI1	0.255914	0.13929	0.272084	0.114712
ENSG00000075043	KCNQ2	0.255718	0.629815	0.408054	0
ENSG00000172803	SNX32	0.255671	0.329187	0.225814	0
ENSG00000143363	PRUNE1	0.255617	0	0.191844	0
ENSG00000267699	AC091551	0.255471	0	0.409445	0
ENSG00000140470	ADAMTS17	0.255371	0	0	0
ENSG00000157087	ATP2B2	0.255019	0.840202	0.579896	0.132824
ENSG00000132600	PRMT7	0.25484	0.297271	0.320869	0
ENSG00000129925	TMEM8A	0.254736	0	0.177604	0
ENSG00000125375	ATP5S	0.254661	0	0.0434145	0
ENSG00000110429	FBXO3	0.254656	0.155287	0.349148	0
ENSG00000196747	HIST1H2AI	0.254036	0	0	0
ENSG00000171202	TMEM126A	0.253962	0	0.08413	0
ENSG00000242013	NA	0.253862	0	0.0656669	0
ENSG00000123444	KBTBD4	0.253696	0.311409	0	0
ENSG00000084764	MAPRE3	0.253621	0.372429	0.321531	0.0694924
ENSG00000165526	RPUSD4	0.253371	0	0	0
ENSG00000089737	DDX24	0.253289	0.279295	0.359599	0.131715
ENSG00000135119	RNFT2	0.25313	0.584708	0.340241	0
ENSG00000118473	SGIP1	0.253061	0.516028	0.382075	0.173608
ENSG00000157869	RAB28	0.25287	0	0.257263	0.0999261
ENSG00000158092	NCK1	0.252788	0	0.0613554	0
ENSG00000254402	LRRC24	0.252623	0.290653	0.175811	0.0985707
ENSG00000213339	QTRT1	0.252597	0	0.0293713	0
ENSG00000168772	CXXC4	0.252516	0.342562	0.610841	0
ENSG00000169891	REPS2	0.252423	0.819048	0	0
ENSG00000185875	THNSL1	0.252343	0	0.15221	0
ENSG00000076555	ACACB	0.252235	0.0363009	0	0.406741
ENSG00000142875	PRKACB	0.25214	0.465803	0.200457	0
ENSG00000130559	CAMSAP1	0.251961	0.319933	0.217809	0
ENSG00000006715	VPS41	0.251741	0.280956	0.284553	0
ENSG00000184898	RBM43	0.251644	0.21991	0.441374	0
ENSG00000133026	MYH10	0.251534	0.256052	0.402747	0
ENSG00000164542	KIAA0895	0.251377	0	0.471685	0
ENSG00000109685	NSD2	0.25124	0	0.319398	0
ENSG00000115464	USP34	0.251079	0	0.313258	0
ENSG00000171533	MAP6	0.250996	0.216532	0.0411138	0.0760227
ENSG00000273079	GRIN2B	0.250794	0.839021	0.613236	0
ENSG00000128510	CPA4	0.250741	0	0	0
ENSG00000113758	DBN1	0.250314	0.067735	0.3375	0.177181
ENSG00000177432	NAP1L5	0.249947	0.236325	0.273211	0.197758
ENSG00000182670	TTC3	0.249893	0.287698	0.333546	0.201207
ENSG00000132518	GUCY2D	0.249879	0	0	0
ENSG00000139970	RTN1	0.24968	0.431479	0.310724	0.231395
ENSG00000090905	TNRC6A	0.249551	0.00626781	0.192544	0
ENSG00000067836	ROGDI	0.249547	0.103276	0.360584	0.169542
ENSG00000139410	SDSL	0.249529	0	0.69702	0.455317
ENSG00000087460	GNAS	0.24952	0.105627	0.249239	0.221784
ENSG00000160392	C19orf47	0.249443	0	0	0
ENSG00000175893	ZDHHC21	0.249373	0.254198	0.0767668	0.0368408
ENSG00000130529	TRPM4	0.249261	0	0	0
ENSG00000134115	CNTN6	0.249235	0.881288	0	0
ENSG00000177932	ZNF354C	0.249212	0	0.149002	0
ENSG00000122952	ZWINT	0.249201	0.351475	0.346619	0.172006
ENSG00000183773	AIFM3	0.2489	0	0	0
ENSG00000150625	GPM6A	0.248721	0.540201	0.359879	0
ENSG00000101856	PGRMC1	0.248615	0.292641	0.399385	0
ENSG00000131711	MAP1B	0.248508	0.235043	0.348469	0.237802
ENSG00000114120	SLC25A36	0.248364	0.0198006	0.301983	0
ENSG00000124191	TOX2	0.248267	0.309519	0.0716552	0
ENSG00000147416	ATP6V1B2	0.248193	0.454758	0.366383	0.0738048
ENSG00000105649	RAB3A	0.247869	0.527995	0.408716	0.231641
ENSG00000105245	NUMBL	0.247656	0.280702	0.330831	0
ENSG00000075945	KIFAP3	0.247533	0.514414	0.357406	0.156974
ENSG00000198961	PJA2	0.247421	0.323418	0.357213	0
ENSG00000008277	ADAM22	0.247324	0.620575	0.384794	0
ENSG00000152578	GRIA4	0.247256	0.165172	0.785732	0
ENSG00000143933	CALM2	0.247069	0.238818	0.243637	0.187531
ENSG00000128245	YWHAH	0.247016	0.459823	0.286852	0.223139
ENSG00000131375	CAPN7	0.246912	0	0.0441232	0
ENSG00000168137	SETD5	0.246882	0.089886	0.196948	0
ENSG00000145349	CAMK2D	0.246787	0.0274217	0.216909	0
ENSG00000169758	TMEM266	0.246786	0	0.478534	0
ENSG00000134242	PTPN22	0.246777	0	0	0
ENSG00000095713	CRTAC1	0.246735	0.159426	0	0.780368
ENSG00000123416	TUBA1B	0.246697	0.190385	0.311593	0.0617299
ENSG00000102109	PCSK1N	0.246537	0.33099	0.243256	0.165352
ENSG00000175606	TMEM70	0.246528	0.174821	0.0968465	0
ENSG00000203867	RBM20	0.246147	0	0	0
ENSG00000120251	GRIA2	0.24611	0.539435	0.401362	0.160547
ENSG00000105821	DNAJC2	0.245757	0	0	0
ENSG00000126705	AHDC1	0.245718	0	0.321996	0.0231641
ENSG00000179222	MAGED1	0.245684	0.223932	0.355563	0
ENSG00000185697	MYBL1	0.245672	0	0	0
ENSG00000135472	FAIM2	0.245631	0.759411	0.344401	0
ENSG00000163214	DHX57	0.245559	0.0409544	0.306839	0
ENSG00000178562	CD28	0.245479	0	0	0
ENSG00000196950	SLC39A10	0.245438	0.398225	0.191259	0
ENSG00000168056	LTBP3	0.245271	0	0.299351	0
ENSG00000014641	MDH1	0.245258	0.215456	0.378212	0.216732
ENSG00000080224	EPHA6	0.245221	0.0372865	0	0
ENSG00000166922	SCG5	0.245205	0.410172	0.402629	0
ENSG00000120662	MTRF1	0.245008	0.299886	0	0
ENSG00000136811	ODF2	0.244756	0.0167379	0.236717	0
ENSG00000147912	FBXO10	0.244619	0.611194	0.0493636	0
ENSG00000130762	ARHGEF16	0.244605	0	0	0
ENSG00000182985	CADM1	0.244512	0.224992	0	0
ENSG00000070610	GBA2	0.24446	0.216906	0.05943	0
ENSG00000111731	C2CD5	0.244414	0	0.362115	0
ENSG00000123552	USP45	0.244319	0.00505698	0.316333	0.0402908
ENSG00000164619	BMPER	0.243991	0	0	0
ENSG00000137760	ALKBH8	0.243991	0	0	0
ENSG00000172465	TCEAL1	0.243863	0	0.254977	0
ENSG00000143674	MAP3K21	0.243833	0	0	0
ENSG00000156976	EIF4A2	0.243819	0.12849	0.24429	0.115574
ENSG00000051620	HEBP2	0.24371	0	0.0664186	0
ENSG00000157870	FAM213B	0.243502	0.259896	0.311188	0
ENSG00000244045	TMEM199	0.243495	0.0428063	0.361648	0
ENSG00000006432	MAP3K9	0.243481	0	0.46814	0
ENSG00000100442	FKBP3	0.243446	0.147792	0.346505	0.199113
ENSG00000198909	MAP3K3	0.243286	0	0	0.0233948
ENSG00000159228	CBR1	0.243085	0	0.486848	0.023657
ENSG00000101236	RNF24	0.243073	0.381695	0.241583	0
ENSG00000177182	CLVS1	0.242972	0.555563	0.48694	0.180226
ENSG00000109472	CPE	0.242967	0.198575	0.209267	0.201947
ENSG00000133101	CCNA1	0.242932	0	0	0
ENSG00000104112	SCG3	0.242897	0	0	0.156358
ENSG00000146540	C7orf50	0.24289	0	0	0
ENSG00000106089	STX1A	0.242876	0.7302	0.192303	0.0181124
ENSG00000090971	NAT14	0.242814	0	0	0
ENSG00000133704	IPO8	0.24274	0	0.139484	0
ENSG00000135740	SLC9A5	0.242704	0.744281	0.252099	0
ENSG00000092096	SLC22A17	0.24254	0.473186	0.269935	0
ENSG00000102096	PIM2	0.242524	0.0178775	0.396919	0
ENSG00000011485	PPP5C	0.242515	0	0.252242	0
ENSG00000132975	GPR12	0.2423	0.956635	0.238382	0
ENSG00000166913	YWHAB	0.242274	0.2791	0.236298	0.0278462
ENSG00000163584	RPL22L1	0.242221	0	0.230803	0.0272302
ENSG00000181072	CHRM2	0.242157	0	0.91293	0.922228
ENSG00000147027	TMEM47	0.242131	0	0.216687	0.180982
ENSG00000170540	ARL6IP1	0.242114	0.174644	0.223461	0
ENSG00000166681	BEX3	0.242061	0	0.302908	0.164243
ENSG00000148803	FUOM	0.242036	0	0.322647	0.331214
ENSG00000154380	ENAH	0.241962	0	0.231293	0
ENSG00000196230	TUBB	0.241795	0.20349	0.251817	0.18445
ENSG00000264364	DYNLL2	0.241741	0.187892	0.242169	0.155742
ENSG00000125484	GTF3C4	0.241657	0	0	0
ENSG00000185222	TCEAL9	0.241635	0	0.138732	0.115697
ENSG00000113387	SUB1	0.241581	0	0.170002	0
ENSG00000241935	HOGA1	0.241558	0	0	0
ENSG00000141385	AFG3L2	0.241529	0.149786	0.352294	0.108181
ENSG00000137200	CMTR1	0.241377	0.19131	0.20966	0
ENSG00000186501	TMEM222	0.24127	0.136374	0.228944	0
ENSG00000163032	VSNL1	0.241262	0.78881	0.487823	0.402725
ENSG00000110675	ELMOD1	0.241252	0.245626	0.644512	0.203264
ENSG00000005810	MYCBP2	0.241155	0.402139	0.318049	0
ENSG00000153130	SCOC	0.241102	0.146225	0.225591	0.189995
ENSG00000180543	TSPYL5	0.240945	0.462367	0.372227	0
ENSG00000164076	CAMKV	0.240877	0.97381	0.369825	0
ENSG00000134291	TMEM106C	0.240808	0	0.166004	0
ENSG00000176209	SMIM19	0.240784	0	0.371077	0
ENSG00000070087	PFN2	0.240622	0.25038	0.233809	0.211681
ENSG00000165271	NOL6	0.240614	0.323005	0	0
ENSG00000111669	TPI1	0.240409	0.192877	0.320767	0.195909
ENSG00000179148	ALOXE3	0.240397	0.317069	0.190503	0
ENSG00000015479	MATR3	0.240356	0.217949	0.272542	0
ENSG00000131187	F12	0.240237	0	0	0
ENSG00000143256	PFDN2	0.239983	0	0.229933	0
ENSG00000114302	PRKAR2A	0.239906	0.117704	0.142865	0
ENSG00000084090	STARD7	0.239862	0.094592	0.044975	0
ENSG00000198915	RASGEF1A	0.239661	0.630659	0.500341	0
ENSG00000156381	ANKRD9	0.239367	0.402927	0.100699	0
ENSG00000197170	PSMD12	0.239336	0.126211	0.296375	0
ENSG00000141002	TCF25	0.23929	0.210114	0.292656	0.15106
ENSG00000214367	HAUS3	0.239189	0	0	0
ENSG00000213585	VDAC1	0.239184	0.253093	0.391959	0.227329
ENSG00000020577	SAMD4A	0.239006	0.147821	0.33627	0
ENSG00000100220	RTCB	0.238868	0	0.245316	0.0820601
ENSG00000104361	NIPAL2	0.238608	0.294817	0.156712	0
ENSG00000188133	TMEM215	0.238545	0.870605	0	0
ENSG00000130770	ATPIF1	0.238544	0.105342	0.238797	0.213159
ENSG00000153933	DGKE	0.238434	0.491007	0.468926	0
ENSG00000051825	MPHOSPH9	0.238202	0	0	0
ENSG00000143545	RAB13	0.238137	0	0.291757	0
ENSG00000120457	KCNJ5	0.238136	0.831759	0.327836	0
ENSG00000138757	G3BP2	0.238065	0.216595	0.343002	0
ENSG00000114573	ATP6V1A	0.238012	0.427201	0.309797	0.171267
ENSG00000164610	RP9	0.237989	0.0195869	0.204881	0
ENSG00000104967	NOVA2	0.237981	0	0.312372	0
ENSG00000133318	RTN3	0.237958	0.322646	0.240864	0
ENSG00000147676	MAL2	0.23787	0.86032	0.614699	0.114096
ENSG00000238244	GABARAPL3	0.237852	0.205983	0.29271	0.238172
ENSG00000078549	ADCYAP1R1	0.237762	0.148038	0.273249	0
ENSG00000171530	TBCA	0.237692	0	0.319573	0
ENSG00000115266	APC2	0.237514	0	0.495062	0
ENSG00000051596	THOC3	0.237397	0	0.421368	0
ENSG00000160716	CHRNB2	0.237356	0.466325	0.627998	0
ENSG00000125505	MBOAT7	0.23725	0.552915	0.377138	0
ENSG00000185104	FAF1	0.237249	0	0.460158	0
ENSG00000158470	B4GALT5	0.237218	0	0.618938	0
ENSG00000144136	SLC20A1	0.237117	0.409397	0.464348	0.0818137
ENSG00000185129	PURA	0.237052	0.14302	0.243012	0.0782405
ENSG00000137409	MTCH1	0.236946	0.217663	0.341088	0
ENSG00000120696	KBTBD7	0.236937	0.112744	0.0986183	0
ENSG00000105143	SLC1A6	0.236889	0.931763	0.514309	0
ENSG00000133612	AGAP3	0.236668	0.363629	0.236921	0
ENSG00000059573	ALDH18A1	0.23657	0	0.505526	0
ENSG00000099797	TECR	0.23652	0.306324	0.233162	0
ENSG00000159256	MORC3	0.236159	0	0.0113893	0
ENSG00000091651	ORC6	0.236	0	0.201351	0
ENSG00000140632	GLYR1	0.235821	0.0930199	0.283307	0
ENSG00000171246	NPTX1	0.235796	0.992527	0.102386	0
ENSG00000029364	SLC39A9	0.235559	0	0.29041	0
ENSG00000170903	MSANTD4	0.235462	0	0.271902	0
ENSG00000171649	ZIK1	0.235457	0.0530552	0.214656	0
ENSG00000100095	SEZ6L	0.235229	0.701657	0.382054	0
ENSG00000197296	FITM2	0.235219	0	0.146935	0.0211927
ENSG00000182768	NGRN	0.235164	0	0.44463	0.286658
ENSG00000130227	XPO7	0.2351	0	0.280379	0
ENSG00000018189	RUFY3	0.235028	0.213045	0.376185	0.0545835
ENSG00000177030	DEAF1	0.235022	0	0	0
ENSG00000115694	STK25	0.234858	0.240279	0.327198	0.0949975
ENSG00000198668	CALM1	0.234815	0.237179	0.23151	0.193322
ENSG00000138468	SENP7	0.234671	0	0.0940926	0
ENSG00000103266	STUB1	0.234601	0	0.299515	0.160793
ENSG00000147437	GNRH1	0.234595	0	0	0
ENSG00000078328	RBFOX1	0.234572	0.959401	0.583836	0
ENSG00000119661	DNAL1	0.234437	0.0593305	0.0735389	0
ENSG00000173915	USMG5	0.234282	0	0.232706	0.210202
ENSG00000131462	TUBG1	0.23414	0	0.14217	0.0697388
ENSG00000185787	MORF4L1	0.234069	0	0.224875	0
ENSG00000116688	MFN2	0.234066	0.208581	0.116563	0
ENSG00000131779	PEX11B	0.233968	0.0703074	0	0.00209463
ENSG00000085433	WDR47	0.23392	0.572008	0.345836	0
ENSG00000108061	SHOC2	0.233864	0.0124644	0.283582	0.0226713
ENSG00000100554	ATP6V1D	0.233802	0.431196	0.266688	0
ENSG00000197106	SLC6A17	0.233795	0.455827	0.564459	0.0877279
ENSG00000127252	HRASLS	0.233762	0.159775	0.311176	0
ENSG00000117906	RCN2	0.233749	0	0.29703	0
ENSG00000105784	RUNDC3B	0.233701	0.392544	0.547248	0
ENSG00000178719	GRINA	0.233589	0.526694	0.347892	0.148965
ENSG00000136003	ISCU	0.233483	0	0.260738	0.138369
ENSG00000130638	ATXN10	0.233376	0.197792	0.400337	0
ENSG00000178467	P4HTM	0.233365	0.6559	0.202727	0
ENSG00000067225	PKM	0.233323	0.257889	0.246844	0.194184
ENSG00000128159	TUBGCP6	0.233001	0	0.299674	0
ENSG00000213085	CFAP45	0.232984	0	0	0
ENSG00000020129	NCDN	0.232867	0.885092	0.353456	0
ENSG00000134900	TPP2	0.232751	0.245664	0	0
ENSG00000134775	FHOD3	0.232693	0.829982	0.491116	0
ENSG00000056097	ZFR	0.232683	0.202635	0.250739	0.00036964
ENSG00000146676	PURB	0.232606	0	0.235338	0.199852
ENSG00000120265	PCMT1	0.232577	0.309746	0.268236	0
ENSG00000130294	KIF1A	0.23247	0.279226	0.228138	0.154017
ENSG00000016864	GLT8D1	0.232388	0	0	0
ENSG00000146409	SLC18B1	0.232282	0.237832	0	0
ENSG00000115275	MOGS	0.232237	0.497796	0.189244	0
ENSG00000239672	NME1	0.232204	0.148575	0.294311	0.149088
ENSG00000099622	CIRBP	0.23215	0	0.241558	0.142804
ENSG00000063587	ZNF275	0.232119	0.0189359	0	0
ENSG00000158428	CATIP	0.232111	0	0	0
ENSG00000117691	NENF	0.232044	0	0.242353	0.0911779
ENSG00000139163	ETNK1	0.231937	0.164307	0.299072	0.122721
ENSG00000214113	LYRM4	0.231926	0	0.622618	0
ENSG00000198729	PPP1R14C	0.231894	0	0.29743	0.828285
ENSG00000131507	NDFIP1	0.231736	0.278838	0	0
ENSG00000203879	GDI1	0.231724	0.262044	0.275229	0.165968
ENSG00000176022	B3GALT6	0.231623	0.309263	0.266653	0
ENSG00000150281	CTF1	0.231533	0	0	0
ENSG00000122483	CCDC18	0.231292	0	0	0.0663657
ENSG00000123562	MORF4L2	0.231245	0.0179487	0.182347	0
ENSG00000185480	PARPBP	0.231073	0	0.130325	0
ENSG00000115904	SOS1	0.231018	0.222489	0.365177	0
ENSG00000109180	OCIAD1	0.230925	0.24744	0.286494	0
ENSG00000088367	EPB41L1	0.230893	0	0.347817	0
ENSG00000130703	OSBPL2	0.230863	0.287883	0.218515	0
ENSG00000159164	SV2A	0.230818	0.529879	0.331414	0.188024
ENSG00000143450	OAZ3	0.230785	0	0	0
ENSG00000107537	PHYH	0.230774	0	0	0
ENSG00000166477	LEO1	0.230718	0	0	0
ENSG00000095002	MSH2	0.2307	0	0.173349	0.0208231
ENSG00000115073	ACTR1B	0.230486	0.252881	0.33772	0.0821833
ENSG00000137965	IFI44	0.230392	0	0	0
ENSG00000198888	MT-ND1	0.230392	0.246154	0.235317	0.223879
ENSG00000151729	SLC25A4	0.230072	0.182407	0.23015	0.183834
ENSG00000104093	DMXL2	0.230035	0.469902	0.389291	0
ENSG00000131398	KCNC3	0.230022	0.65211	0.131887	0.902109
ENSG00000189043	NDUFA4	0.229966	0.205199	0.236187	0.230286
ENSG00000170315	UBB	0.229913	0	0.118447	0.0261212
ENSG00000111897	SERINC1	0.229806	0.230342	0.241407	0
ENSG00000122687	MRM2	0.229656	0	0	0
ENSG00000148343	MIGA2	0.229615	0	0.316752	0
ENSG00000075415	SLC25A3	0.229593	0.211752	0.181205	0.209586
ENSG00000255181	CCDC166	0.229584	0	0.499998	0.109795
ENSG00000164742	ADCY1	0.229517	0	0.473133	0.897902
ENSG00000158106	RHPN1	0.229399	0	0.044373	0
ENSG00000083642	PDS5B	0.229369	0.284508	0.577926	0
ENSG00000204619	PPP1R11	0.229273	0	0.223882	0.0639478
ENSG00000181982	CCDC149	0.229269	0.00156045	0.351086	0
ENSG00000156261	CCT8	0.22922	0.111182	0.36227	0
ENSG00000164924	YWHAZ	0.229113	0.220157	0.254886	0
ENSG00000072133	RPS6KA6	0.228992	0	0.490294	0
ENSG00000106615	RHEB	0.2289	0	0.23799	0.191597
ENSG00000126432	PRDX5	0.228847	0.111966	0.271598	0.209463
ENSG00000185559	DLK1	0.228796	0	0.848921	0
ENSG00000100580	TMED8	0.228654	0.102749	0.131934	0
ENSG00000106537	TSPAN13	0.228474	0.177635	0.0636828	0.0655495
ENSG00000066739	ATG2B	0.228325	0.124435	0.496078	0
ENSG00000069956	MAPK6	0.228256	0	0.199445	0
ENSG00000123091	RNF11	0.22825	0.172899	0.26226	0
ENSG00000175536	LIPT2	0.228168	0	0	0
ENSG00000117335	CD46	0.22797	0	0	0
ENSG00000186231	KLHL32	0.227793	0.426697	0.322052	0.0735584
ENSG00000186010	NDUFA13	0.227781	0.092094	0.22618	0.202686
ENSG00000111716	LDHB	0.227675	0.169658	0.320941	0.224864
ENSG00000132950	ZMYM5	0.227666	0	0.0186535	0.0204534
ENSG00000198420	TCAF1	0.227665	0.236532	0.395778	0.102267
ENSG00000230055	NA	0.227558	0	0.248007	0.13036
ENSG00000152234	ATP5A1	0.227408	0.177493	0.248673	0.171883
ENSG00000105576	TNPO2	0.227399	0.275987	0.335546	0
ENSG00000089123	TASP1	0.227393	0.0651594	0.192833	0
ENSG00000124535	WRNIP1	0.227332	0.360227	0.0853404	0
ENSG00000088833	NSFL1C	0.227305	0	0.245028	0
ENSG00000110871	COQ5	0.227267	0	0.374761	0
ENSG00000160214	RRP1	0.227142	0.195584	0.339953	0
ENSG00000064313	TAF2	0.22688	0	0	0
ENSG00000172270	BSG	0.226716	0.197222	0.037742	0.164367
ENSG00000165118	C9orf64	0.226526	0	0	0
ENSG00000178127	NDUFV2	0.226396	0.13604	0.298776	0.166708
ENSG00000176946	THAP4	0.226234	0	0.0738079	0
ENSG00000131127	ZNF141	0.226215	0.567576	0.546466	0.0500246
ENSG00000162630	B3GALT2	0.226185	0.219174	0.811342	0.54471
ENSG00000164985	PSIP1	0.226183	0	0.37017	0.191227
ENSG00000211460	TSN	0.226076	0	0.283835	0.0309266
ENSG00000100401	RANGAP1	0.225937	0.327283	0.408104	0.161656
ENSG00000141519	CCDC40	0.225874	0	0	0
ENSG00000154518	ATP5G3	0.225863	0.160755	0.247092	0.217595
ENSG00000135974	C2orf49	0.22578	0	0.256496	0
ENSG00000173809	TDRD12	0.225608	0	0	0
ENSG00000151640	DPYSL4	0.225576	0.5105	0.318525	0
ENSG00000110955	ATP5B	0.225384	0.199359	0.19888	0.228561
ENSG00000114923	SLC4A3	0.225315	0.41146	0.606793	0.166092
ENSG00000077942	FBLN1	0.225203	0	0	0
ENSG00000110917	MLEC	0.22517	0	0.253955	0
ENSG00000109184	DCUN1D4	0.225138	0.31845	0.530177	0
ENSG00000134375	TIMM17A	0.225109	0.0222934	0.336784	0
ENSG00000087191	PSMC5	0.225064	0.0926638	0.239076	0
ENSG00000154118	JPH3	0.225009	0.811102	0.352004	0
ENSG00000104695	PPP2CB	0.224898	0.00804843	0.291589	0.0915476
ENSG00000187164	SHTN1	0.224852	0	0	0
ENSG00000161860	SYCE2	0.2248	0	0.393057	0
ENSG00000069974	RAB27A	0.224739	0	0	0
ENSG00000175224	ATG13	0.224718	0.0799821	0.120397	0.187818
ENSG00000105255	FSD1	0.224642	0.0288462	0.270122	0.0699852
ENSG00000151247	EIF4E	0.224638	0	0.256297	0
ENSG00000146701	MDH2	0.224584	0.174715	0.310136	0.192583
ENSG00000108946	PRKAR1A	0.224478	0.155413	0.244392	0.148595
ENSG00000058091	CDK14	0.224342	0.576298	0	0.682976
ENSG00000131437	KIF3A	0.224318	0.34439	0.145749	0.127896
ENSG00000177830	CHID1	0.224294	0.086396	0.161152	0
ENSG00000164032	H2AFZ	0.224158	0	0.184903	0.141449
ENSG00000113719	ERGIC1	0.22401	0.142292	0.39071	0
ENSG00000162769	FLVCR1	0.223822	0	0.267306	0
ENSG00000166454	ATMIN	0.223817	0.355459	0.116642	0
ENSG00000095203	EPB41L4B	0.2237	0	0.23432	0
ENSG00000173918	C1QTNF1	0.223689	0	0	0
ENSG00000065548	ZC3H15	0.223465	0.100499	0.291693	0.128388
ENSG00000113083	LOX	0.223448	0	0	0
ENSG00000134440	NARS	0.223412	0.195726	0.487616	0.111508
ENSG00000100626	GALNT16	0.223393	0.86173	0.26891	0
ENSG00000119401	TRIM32	0.223365	0.381615	0.513097	0
ENSG00000029363	BCLAF1	0.223359	0.0908832	0.159285	0
ENSG00000136521	NDUFB5	0.223306	0.162179	0.281538	0.0316658
ENSG00000114383	TUSC2	0.223293	0.0732906	0.245606	0.176565
ENSG00000196411	EPHB4	0.223272	0	0.0912779	0
ENSG00000178741	COX5A	0.223252	0.188105	0.21069	0.213036
ENSG00000113552	GNPDA1	0.223221	0.0630749	0	0
ENSG00000183978	COA3	0.223199	0.0318376	0.181586	0.11619
ENSG00000137054	POLR1E	0.22314	0	0	0
ENSG00000131174	COX7B	0.223039	0	0.220307	0.218581
ENSG00000198908	BHLHB9	0.222993	0	0.635069	0
ENSG00000100994	PYGB	0.222907	0	0.475958	0
ENSG00000118680	MYL12B	0.222773	0.183689	0.219359	0.0459586
ENSG00000166002	SMCO4	0.222733	0.275797	0	0
ENSG00000125864	BFSP1	0.222563	0	0	0
ENSG00000145020	AMT	0.222513	0	0.0601037	0
[truncated: 12,711 more rows]
