# Supplementary material for: Genetic mapping of etiologic brain cell types for obesity
Source: eLife. 2020 Sep 21;9:e55851. doi: 10.7554/eLife.55851 (PMC7505664; doi:10.7554/eLife.55851)
Supplement: Figure 5—source data 4. [file elife-55851-fig5-data4.xlsx]

## Sheet: Table overview
Overview
Supplementary Table 1: List of GWAS summary statistics analyzed
Supplementary Table 2: Tabula Muris cell-type meta-data
Supplementary Table 3: Mouse Nervous System cell-type meta-data
Supplementary Table 4: Cell-type prioritization and heritability analysis for Tabula Muris dataset
Supplementary Table 5: Cell-type prioritization and heritability analysis for Mouse Nervous System dataset
Supplementary Table 6: Gene ESμ values for MNS BMI-prioritized cell-types
Supplementary Table 7: Summary of prioritization of BMI-prioritized cell-types across GWAS traits.
Supplementary Table 8: Genetic prioritization of cell-type gene co-expression networks
Supplementary Table 9: M1 module genes and MAGMA P-values
Supplementary Table 10: MAGMA-based cell-type prioritization for Mouse Nervous System dataset
Supplementary Table 11: Conditional cell-type prioritization for Mouse Nervous System dataset
Supplementary Table 12: Hypothalamus cell-type meta-data
Supplementary Table 13: Cell-type prioritization analysis for the hypothalamus datasets
Supplementary Table 14: Gene ESμ values for hypothalamus BMI-prioritized cell-types
Supplementary Table 15: Obesity rare variant geneset
Supplementary Table 16: Obesity rare variant geneset Mouse Nervous System cell types enrichment results

## Sheet: 1 - GWAS summary stats
Trait category		Trait name		Study reference		Study information					Prevalence (case/control only)
GWAS trait representative	Trait category	Trait full name	Trait abbreviation	Author	Year	GWAS violates LDSC assumptions	Ancestry	Custom array in cohort	N	Neff	Population prevalence	Sample prevalence
TRUE	neurological	Alzheimer's Disease	AD	Jansen	2019		EUR	NO	455258
TRUE	neuropsychiatric	Attention Deficit Hyperactivity Disorder	ADHD	Demontis	2017		EUR	NO	53293
TRUE	neuropsychiatric	Anorexia Nervosa	AN	Duncan	2017		EUR	NO	14477
TRUE	neuropsychiatric	Autism Spectrum Disorder	ASD	Grove	2018		EUR	NO	46350
TRUE	neuropsychiatric	Bipolar Disorder	BIP	PGC	2018		EUR	NO	41653
FALSE	anthropometric	BMI	BMI	Locke	2015	TRUE	EUR	Metabochip	322154
TRUE	anthropometric	BMI	BMI	Loh	2018		EUR	NO	457824	532396
FALSE	anthropometric	BMI	BMI	Yengo	2018	TRUE	EUR	Metabochip	681275
TRUE	cardivascular	Coronary Artery Disease	CAD	Schunkert	2011		EUR	NO	86995
TRUE	cardivascular	Cardiovascular Diseases	CV	Loh	2018		EUR	NO	459324	477807
TRUE	Immune	Celiac Disease	CELIAC	Dubois	2010		EUR	NO	15283
TRUE	Immune	Crohn's Disease	CROHNS	Jostins	2012		EUR	NO	20883
FALSE	behavioral	Depressed Affect	DEP_AFFECT	Nagel	2018		EUR	NO	357957
TRUE	behavioral	Depression	DEP	Nagel	2018		EUR	NO	381455
TRUE	cardivascular	Diastolic Blood Pressure (adj. medicine)	BP_DIA	Loh	2018		EUR	NO	422771	490470
FALSE	behavioral	Depressive Symptoms	DS	Okbay	2016		EUR	NO	161460
FALSE	behavioral	Educational Attainment	EA2	Okbay	2016		EUR	NO	217568
TRUE	behavioral	Educational Attainment	EA3	Lee	2018		EUR	NO	766345
TRUE	metabolic	Fasting Glucose (female)	FG_F	Lagou	2018	TRUE	EUR and non-EUR	Metabochip	73089
TRUE	metabolic	Fasting Insulin (female)	FI_F	Lagou	2018	TRUE	EUR and non-EUR	Metabochip	50404
TRUE	metabolic	HbA1c	HBA1C	Wheeler	2017	TRUE	EUR	Metabochip	123665
TRUE	anthropometric	Height	HEIGHT	Loh	2018		EUR	NO	458303	673879
FALSE	anthropometric	Height	HEIGHT	Yengo	2018		EUR	NO	693529
TRUE	Immune	Inflammatory Bowel Disease	IBD	Jostins	2012		EUR	NO	34652
TRUE	behavioral	Insomnia	INS	Jansen	2018		EUR	NO	386533		0.20	0.28
TRUE	behavioral	Intelligence	INT	Savage	2018		EUR	NO	269867
FALSE	behavioral	Intelligence	INT	Sniekers	2017		EUR	NO	78308
TRUE	lipids	High Density Lipoprotein	HDL	Teslovich	2010		EUR	NO	99900
TRUE	lipids	Low Density Lipoprotein	LDL	Teslovich	2010		EUR	NO	95454
TRUE	lipids	Triglycerides	TG	Teslovich	2010		EUR	NO	96598
TRUE	Immune	Systemic Lupus Erythematosus	LUPUS	Bentham	2015		EUR	NO	14267
TRUE	neuropsychiatric	Major Depression Disorder	MDD	Howard	2019		EUR	NO	500199
FALSE	neuropsychiatric	Major Depression Disorder	MDD	Wray	2018		EUR	NO	153780
TRUE	neurological	Multiple Sclerosis	MS	Patsopoulos	2011		EUR	NO	17698		0.001	0.31
TRUE	behavioral	Neuroticism	NEU	Nagel	2018		EUR	NO	390278
FALSE	behavioral	Neuroticism	NEU	Okbay	2016		EUR	NO	170911
TRUE	Immune	Primary Biliary Cirrhosis	PBC	Cordell	2015		EUR	NO	13239
TRUE	Immune	Rheumatoid Arthritis	RA	Okada	2014		EUR	NO	38242		0.01	0.29
TRUE	behavioral	Risk Tolerance	RB	Linner	2019		EUR	NO	466571
FALSE	neuropsychiatric	Schizophrenia	SCZ	Ripke	2014		EUR	NO	77096
TRUE	neuropsychiatric	Schizophrenia	SCZ	Pardinas	2018		EUR	NO	105318		0.01	0.39
TRUE	behavioral	Subjective Well Being	SWB	Okbay	2016		EUR	NO	298420
TRUE	cardivascular	Systolic Blood Pressure (adj. medicine)	BP_SYS	Loh	2018		EUR	NO	422771	469767
TRUE	metabolic	Type 1 Diabetes	T1D	Bradfield	2011		EUR	NO	26890
FALSE	metabolic	Type 2 Diabetes	T2D	Mahajan	2018	TRUE	EUR	Metabochip	898130
TRUE	metabolic	Type 2 Diabetes	T2D	Loh	2018		EUR	NO	459324	468298
TRUE	Immune	Ulcerative Colitis	UC	Jostins	2012		EUR	NO	27432
TRUE	anthropometric	Waist-hip Ratio	WHR	Pulit	2019	TRUE	EUR	Metabochip	697734
FALSE	anthropometric	Waist-hip Ratio (adj. BMI)	WHRadjBMI	Pulit	2019	TRUE	EUR	Metabochip	694649
TRUE	anthropometric	Waist-hip Ratio (adj. BMI)	WHRadjBMI	Loh	2018		EUR	NO	458417	502773
TRUE	behavioral	Worry	WORRY	Nagel	2018		EUR	NO	348219

## Sheet: 2 - TM metadata
Tabula Muris metadata
Annotation	Tissue	Cell type	Ncells	No. ES genes DET	No. ES genes GES	No. ES genes NSI	No. ES genes EP	No. ES genes ESmu
Bladder - bladder cell	Bladder	bladder cell	695	3788	4166	1386	1949	4728
Bladder - bladder urothelial cell	Bladder	bladder urothelial cell	683	4417	5450	1223	1697	5977
Brain - macrophage	Brain	macrophage	61	1544	1066	443	1064	1817
Brain - microglial cell	Brain	microglial cell	4394	2266	1805	1066	2238	3011
Brain - astrocyte	Brain	astrocyte	432	2945	2383	1741	2775	3607
Brain - Bergmann glial cell	Brain	Bergmann glial cell	40	2023	1668	742	1570	2336
Brain - brain pericyte	Brain	brain pericyte	156	2962	2145	777	1377	3334
Brain - endothelial cell	Brain	endothelial cell	715	2696	1841	1231	1696	3359
Brain - neuron	Brain	neuron	281	6272	5771	1624	3309	6730
Brain - oligodendrocyte	Brain	oligodendrocyte	1574	3289	3092	1740	2539	4117
Brain - oligodendrocyte precursor cell	Brain	oligodendrocyte precursor cell	203	5469	4666	1312	2700	5811
Fat - B cell	Fat	B cell	519	1317	658	910	1189	1839
Fat - endothelial cell	Fat	endothelial cell	668	1936	1337	1311	1678	2690
Fat - mesenchymal stem cell of adipose	Fat	mesenchymal stem cell of adipose	2107	3948	4086	1425	2225	4762
Fat - myeloid cell	Fat	myeloid cell	1123	2199	1831	1087	1597	2949
Fat - natural killer cell	Fat	natural killer cell	95	1127	506	531	580	1305
Fat - T cell	Fat	T cell	353	1668	990	853	1275	2151
Fat - unknown cell type	Fat	unknown cell type	102	2620	1723	671	1310	3028
Heart - cardiac muscle cell	Heart	cardiac muscle cell	133	2108	2352	814	1734	2738
Heart - endocardial cell	Heart	endocardial cell	165	2621	1520	870	1304	2890
Heart - endothelial cell	Heart	endothelial cell	1365	1980	1382	1284	1627	2885
Heart - erythrocyte	Heart	erythrocyte	91	1246	1488	1153	3821	3833
Heart - fibroblast	Heart	fibroblast	2189	3584	2876	1490	2323	4397
Heart - leukocyte	Heart	leukocyte	523	2094	1565	952	1311	2662
Heart - myofibroblast cell	Heart	myofibroblast cell	178	2670	1439	1000	1537	2991
Heart - professional antigen presenting cell	Heart	professional antigen presenting cell	59	2075	2321	522	1580	2996
Heart - smooth muscle cell	Heart	smooth muscle cell	42	1904	1143	578	1091	2073
Heart - unknown cell type	Heart	unknown cell type	28	1521	920	567	1268	1741
Kidney - endothelial cell	Kidney	endothelial cell	126	1630	918	803	1398	2039
Kidney - epithelial cell of proximal tubule	Kidney	epithelial cell of proximal tubule	219	1271	863	1371	1748	2045
Kidney - kidney collecting duct epithelial cell	Kidney	kidney collecting duct epithelial cell	121	1075	572	1068	1606	1831
Kidney - leukocyte	Kidney	leukocyte	16	1125	496	280	705	1283
Kidney - macrophage	Kidney	macrophage	37	1003	588	468	824	1258
Large Intestine - Brush cell of epithelium proper of large intestine	Large Intestine	Brush cell of epithelium proper of large intestine	63	1031	1219	716	2136	2263
Large Intestine - enterocyte of epithelium of large intestine	Large Intestine	enterocyte of epithelium of large intestine	964	2771	3372	1845	2793	4019
Large Intestine - enteroendocrine cell	Large Intestine	enteroendocrine cell	59	1399	1551	656	1955	2187
Large Intestine - epithelial cell of large intestine	Large Intestine	epithelial cell of large intestine	2019	4281	5649	1569	3171	6280
Large Intestine - large intestine goblet cell	Large Intestine	large intestine goblet cell	833	3784	4914	1533	2429	5562
Limb Muscle - B cell	Limb Muscle	B cell	71	1285	517	527	895	1536
Limb Muscle - endothelial cell	Limb Muscle	endothelial cell	219	1554	1049	1177	1561	2148
Limb Muscle - lymphocyte	Limb Muscle	lymphocyte	81	1400	559	558	802	1641
Limb Muscle - macrophage	Limb Muscle	macrophage	76	1091	818	547	837	1390
Limb Muscle - mesenchymal stem cell	Limb Muscle	mesenchymal stem cell	499	2327	2046	1548	1818	3049
Limb Muscle - skeletal muscle satellite cell	Limb Muscle	skeletal muscle satellite cell	540	2313	1595	1464	2022	3070
Limb Muscle - skeletal muscle satellite stem cell	Limb Muscle	skeletal muscle satellite stem cell	439	1507	788	1284	1517	2280
Limb Muscle - T cell	Limb Muscle	T cell	35	1210	443	312	390	1312
Liver - B cell	Liver	B cell	41	1058	523	349	614	1231
Liver - endothelial cell of hepatic sinusoid	Liver	endothelial cell of hepatic sinusoid	182	2007	1326	1103	1530	2387
Liver - hepatocyte	Liver	hepatocyte	391	1685	2419	1461	1641	2762
Liver - Kupffer cell	Liver	Kupffer cell	61	870	579	655	922	1215
Liver - natural killer cell	Liver	natural killer cell	39	1808	1014	347	711	1969
Lung - B cell	Lung	B cell	57	1081	529	514	939	1381
Lung - ciliated columnar cell of tracheobronchial tree	Lung	ciliated columnar cell of tracheobronchial tree	25	2473	1937	531	1189	2708
Lung - classical monocyte	Lung	classical monocyte	90	1620	958	389	594	1780
Lung - epithelial cell of lung	Lung	epithelial cell of lung	113	1651	1435	791	1331	2049
Lung - leukocyte	Lung	leukocyte	35	841	431	863	934	1150
Lung - lung endothelial cell	Lung	lung endothelial cell	693	2343	1305	1215	1615	2870
Lung - monocyte	Lung	monocyte	65	1396	904	603	1045	1630
Lung - myeloid cell	Lung	myeloid cell	85	1668	927	371	596	1862
Lung - natural killer cell	Lung	natural killer cell	37	1191	641	348	756	1377
Lung - stromal cell	Lung	stromal cell	423	3019	2311	1352	2111	3522
Lung - T cell	Lung	T cell	53	1339	613	392	672	1518
Lung - unknown cell type	Lung	unknown cell type	40	574	401	550	1303	1387
Mammary Gland - basal cell	Mammary Gland	basal cell	1340	4269	4365	1595	2514	5169
Mammary Gland - endothelial cell	Mammary Gland	endothelial cell	47	1224	703	621	996	1494
Mammary Gland - luminal epithelial cell of mammary gland	Mammary Gland	luminal epithelial cell of mammary gland	578	4050	3905	1292	1858	4800
Mammary Gland - stromal cell	Mammary Gland	stromal cell	440	2697	2044	1342	1609	3217
Marrow - B cell	Marrow	B cell	44	2103	1285	216	422	2360
Marrow - basophil	Marrow	basophil	25	1842	1421	240	571	2168
Marrow - common lymphoid progenitor	Marrow	common lymphoid progenitor	156	5697	5932	648	1922	6384
Marrow - granulocyte	Marrow	granulocyte	761	1483	1287	2008	1989	2810
Marrow - granulocyte monocyte progenitor cell	Marrow	granulocyte monocyte progenitor cell	134	4055	4436	508	1253	4990
Marrow - granulocytopoietic cell	Marrow	granulocytopoietic cell	221	2611	2352	975	1217	2971
Marrow - hematopoietic precursor cell	Marrow	hematopoietic precursor cell	265	5245	4168	612	1848	5562
Marrow - immature B cell	Marrow	immature B cell	344	3055	1651	990	1453	3485
Marrow - immature natural killer cell	Marrow	immature natural killer cell	36	1262	612	315	439	1364
Marrow - immature NK T cell	Marrow	immature NK T cell	37	1562	823	303	474	1693
Marrow - immature T cell	Marrow	immature T cell	60	1601	867	413	806	1773
Marrow - late pro-B cell	Marrow	late pro-B cell	306	4270	3980	904	1676	4774
Marrow - macrophage	Marrow	macrophage	173	2908	1798	660	1292	3143
Marrow - mature natural killer cell	Marrow	mature natural killer cell	49	2120	786	389	483	2213
Marrow - megakaryocyte-erythroid progenitor cell	Marrow	megakaryocyte-erythroid progenitor cell	55	4277	4549	359	1395	5102
Marrow - monocyte	Marrow	monocyte	266	3034	2190	728	1065	3371
Marrow - naive B cell	Marrow	naive B cell	692	1878	816	679	1148	2300
Marrow - pre-natural killer cell	Marrow	pre-natural killer cell	22	2999	2590	276	631	3566
Marrow - precursor B cell	Marrow	precursor B cell	517	2407	1064	1117	1634	2897
Marrow - regulatory T cell	Marrow	regulatory T cell	27	1170	634	304	635	1348
Marrow - Slamf1-negative multipotent progenitor cell	Marrow	Slamf1-negative multipotent progenitor cell	713	5434	5444	948	2344	6056
Marrow - Slamf1-positive multipotent progenitor cell	Marrow	Slamf1-positive multipotent progenitor cell	134	4851	5017	542	1698	5600
Pancreas - endothelial cell	Pancreas	endothelial cell	66	1948	1449	443	984	2197
Pancreas - leukocyte	Pancreas	leukocyte	54	1240	1148	341	875	1596
Pancreas - pancreatic A cell	Pancreas	pancreatic A cell	390	3992	4724	1315	2624	5032
Pancreas - pancreatic acinar cell	Pancreas	pancreatic acinar cell	182	867	806	1288	2704	3005
Pancreas - pancreatic D cell	Pancreas	pancreatic D cell	140	4291	4589	1146	2672	5092
Pancreas - pancreatic ductal cell	Pancreas	pancreatic ductal cell	161	4233	3416	968	1859	4635
Pancreas - pancreatic PP cell	Pancreas	pancreatic PP cell	73	3259	3569	619	1650	4042
Pancreas - pancreatic stellate cell	Pancreas	pancreatic stellate cell	49	2296	1818	526	1376	2612
Pancreas - type B pancreatic cell	Pancreas	type B pancreatic cell	449	4237	5210	1483	2977	5545
Skin - basal cell of epidermis	Skin	basal cell of epidermis	562	3727	3056	1221	1678	4233
Skin - epidermal cell	Skin	epidermal cell	276	4184	4151	1064	1660	4816
Skin - keratinocyte stem cell	Skin	keratinocyte stem cell	1404	4157	2868	1373	2119	4720
Skin - leukocyte	Skin	leukocyte	15	1350	1310	137	630	1859
Skin - stem cell of epidermis	Skin	stem cell of epidermis	53	3449	3331	474	1075	4192
Spleen - B cell	Spleen	B cell	1297	1915	901	861	1546	2520
Spleen - macrophage	Spleen	macrophage	48	1218	665	404	843	1400
Spleen - T cell	Spleen	T cell	352	1823	831	808	1262	2224
Thymus - DN1 thymic pro-T cell	Thymus	DN1 thymic pro-T cell	32	1309	591	484	731	1454
Thymus - immature T cell	Thymus	immature T cell	1277	3030	1329	845	1957	3480
Thymus - leukocyte	Thymus	leukocyte	40	1137	611	323	716	1409
Tongue - basal cell of epidermis	Tongue	basal cell of epidermis	1086	6031	6685	1524	2594	7151
Tongue - keratinocyte	Tongue	keratinocyte	330	4312	4707	1123	1664	5250
Trachea - blood cell	Trachea	blood cell	206	2536	1983	733	1168	2988
Trachea - endothelial cell	Trachea	endothelial cell	113	2437	1652	815	1497	2752
Trachea - epithelial cell	Trachea	epithelial cell	201	1827	1718	934	2486	2855
Trachea - mesenchymal cell	Trachea	mesenchymal cell	830	4067	3907	1594	2320	4819

## Sheet: 3 - MNS metadata
Mouse Nervous System metadata
Annotation	Class	Description	Probable location	Region	TaxonomyRank	Neurotransmitter	Neurotransmitter_class	Ncells	No. ES genes DET	No. ES genes GES	No. ES genes NSI	No. ES genes EP	No. ES genes ESmu
ABC	Vascular	Vascular leptomeningeal cells	Pia/meninges surface	CNS	Vascular	NA	Non-neuron	137	2701	2477	1265	2351	3275
ACBG	Astrocytes	Bergmann glia	Cerebellum	Cerebellum	Astrocytes	NA	Non-neuron	921	1502	1056	2126	2170	2689
ACMB	Astrocytes	Dorsal midbrain Myoc-expressing astrocyte-like	Dorsal midbrain	Midbrain dorsal	Astrocytes	NA	Non-neuron	861	2939	2126	2169	2588	3717
ACNT1	Astrocytes	Non-telencephalon astrocytes, protoplasmic	Non-telencephalon	Hypothalamus,Thalamus,Midbrain dorsal,Midbrain ventral,Pons,Medulla,Spinal cord	Astrocytes	NA	Non-neuron	6642	1721	1343	2414	3364	4080
ACNT2	Astrocytes	Non-telencephalon astrocytes, fibrous	Non-telencephalon	Hypothalamus,Thalamus,Midbrain dorsal,Midbrain ventral,Pons,Medulla,Spinal cord	Astrocytes	NA	Non-neuron	2568	2131	1603	2543	2875	3620
ACOB	Astrocytes	Olfactory astrocytes	Olfactory bulb periglomerular layer	Olfactory bulb	Astrocytes	NA	Non-neuron	1438	2422	1796	2330	2574	3421
ACTE1	Astrocytes	Telencephalon astrocytes, fibrous	Telencephalon	Telencephalon	Astrocytes	NA	Non-neuron	2974	2098	1610	2225	2476	3271
ACTE2	Astrocytes	Telencephalon astrocytes, protoplasmic	Telencephalon	Telencephalon	Astrocytes	NA	Non-neuron	3973	2002	1468	2484	2877	3587
CBGRC	Neurons	Granule neurons, cerebellum	Cerebellum	Cerebellum	Hindbrain neurons	Glutamate (VGLUT1)	Excitatory	4193	616	419	2257	1843	2546
CBINH1	Neurons	Molecular layer interneurons, cerebellum	Cerebellum, molecular layer	Cerebellum	Hindbrain neurons	GABA, Nitric oxide	Inhibitory	662	1537	920	1565	1524	2221
CBINH2	Neurons	Granular layer interneurons, cerebellum	Cerebellum, granular layer	Cerebellum	Hindbrain neurons	GABA, Glycine (GLYT2)	Inhibitory	17	1297	920	436	814	1530
CBNBL1	Neurons	Neuroblasts, cerebellum	Hindbrain (pons, medulla cerabellum)	Pons,Medulla,Cerebellum	Neuroblasts	Glutamate (VGLUT2)	Excitatory	163	1462	732	859	878	1774
CBNBL2	Neurons	Neuroblasts, cerebellum	Cerabellum	Cerebellum	Hindbrain neurons	NA	Missing neurotransmitter	293	567	320	1649	1293	1681
CBPC	Neurons	Purkinje cells	Cerebellum, border of granular layer and molecular layer	Cerebellum	Hindbrain neurons	GABA	Inhibitory	84	927	741	1069	1397	1547
CHOR	Ependymal	Chorid plexus epithelial cells	Medulla,Thalamus	Medulla,Thalamus	Other CNS glia	NA	Non-neuron	458	3818	3582	1869	2943	4424
COP1	Oligos	Committed oligodendrocytes cells (COP)	CNS	CNS	Oligodendrocytes	NA	Non-neuron	1532	3292	2220	2026	2376	4135
COP2	Oligos	Committed oligodendrocytes cells (COP), pons/medulla specific	Pons/medulla (possible batch effect)	CNS	Oligodendrocytes	NA	Non-neuron	254	2448	1678	1627	2079	2949
CR	Neurons	Cajal-Retzius cells, hippocampus	Dentate gyrus molecular layer	Dentate gyrus	Di- and mesencephalon excitatory neurons	Glutamate (VGLUT2)	Excitatory	222	1712	803	894	1078	2140
DECHO1	Neurons	Cholinergic neurons, septal nucleus, Meissnert and diagonal band	Medial septal nuclues, diagonal band nucleus and nucleus basalis of Meissnert	Hypothalamus	Cholinergic and monoaminergic neurons	Acetylcholine, Glutamate (VGLUT3), Nitric oxide	Excitatory	114	4790	5846	454	992	6246
DECHO2	Neurons	Cholinergic neurons, habenula	Habenula	Thalamus	Di- and mesencephalon excitatory neurons	Acetylcholine,Glutamate (VGLUT1,VGLUT3)	Excitatory	207	3173	1902	679	701	3424
DEGLU1	Neurons	Excitatory neurons, thalamus	Posterior thalamus	Thalamus	Di- and mesencephalon excitatory neurons	Glutamate (VGLUT1,VGLUT2)	Excitatory	1058	6713	6877	1294	2119	7398
DEGLU2	Neurons	Excitatory neurons, hypothalamus	Subparafascicular nucleus	Hypothalamus	Di- and mesencephalon excitatory neurons	Glutamate (VGLUT1,VGLUT2)	Excitatory	257	5825	6609	684	1046	6856
DEGLU3	Neurons	Excitatory neurons, thalamus	Paraventricular nucleus of the thalamus	Thalamus	Di- and mesencephalon excitatory neurons	Glutamate (VGLUT2)	Excitatory	1113	6304	5811	1153	1720	6837
DEGLU4	Neurons	Excitatory neurons, thalamus	Parafascicular nucleus	Thalamus	Di- and mesencephalon excitatory neurons	Glutamate (VGLUT2)	Excitatory	101	3834	3339	377	802	4238
DEGLU5	Neurons	Excitatory neurons, midbrain	Anterior pretectal nucleus	Midbrain dorsal	Di- and mesencephalon excitatory neurons	Glutamate (VGLUT1)	Excitatory	426	4949	3810	649	876	5317
DEINH1	Neurons	Inhibitory neurons, thalamus	Reticular nucleus of the thalamus (Sst low)	Thalamus	Telencephalon inhibitory interneurons	GABA	Inhibitory	339	4580	3647	611	775	4902
DEINH2	Neurons	Inhibitory neurons, thalamus	Reticular nucleus of the thalamus	Thalamus	Telencephalon inhibitory interneurons	GABA	Inhibitory	167	3892	2855	498	743	4181
DEINH3	Neurons	Inhibitory neurons, hypothalamus	Subthalamic nucleus	Hypothalamus	Di- and mesencephalon inhibitory neurons	GABA	Inhibitory	323	5359	4751	614	1149	5795
DEINH4	Neurons	Inhibitory neurons, thalamus	Paraventricular nucleus of the thalamus (best fit) but do not fit with Nmu expression	Thalamus	Peptidergic neurons	GABA, Nitric oxide	Inhibitory	57	2948	2083	380	704	3228
DEINH5	Neurons	Peptidergic neurons, hypothalamus	Medial preoptic nucleus, Bed nuclei of the stria terminalis anterior division	Hypothalamus	Peptidergic neurons	GABA	Inhibitory	308	3794	2294	690	770	4161
DEINH6	Neurons	Peptidergic neurons, hypothalamus	Arcuate hypothalamic nucleus (probably, Npy, Agrp cells)	Hypothalamus	Peptidergic neurons	GABA	Inhibitory	12	1394	697	406	661	1549
DEINH7	Neurons	Inhibitory neurons, hypothalamus	Suprachiasmatic nucleus, Medial preoptic nucleus	Hypothalamus	Peptidergic neurons	GABA	Inhibitory	182	981	477	1012	934	1480
DEINH8	Neurons	Inhibitory neurons, hypothalamus	Suprachiasmatic nucleus, Medial preoptic nucleus	Hypothalamus	Peptidergic neurons	GABA	Inhibitory	120	1334	589	673	695	1591
DETPH	Neurons	Neuroblast-like, habenula	Medial habenula	Thalamus	Neuroblasts	NA	Missing neurotransmitter	7	1202	780	535	714	1338
DGGRC1	Neurons	Granule neuroblasts, dentate gyrus	Dentate gyrus	Dentate gyrus	Other CNS neurons	Glutamate (VGLUT1)	Excitatory	983	3354	2139	1552	1513	3944
DGGRC2	Neurons	Granule neurons, dentate gyrus	Dentate gyrus	Dentate gyrus	Other CNS neurons	Glutamate (VGLUT1)	Excitatory	3385	3539	2258	1752	1947	4380
DGNBL1	Neurons	Granule neuroblasts, dentate gyrus	Dentate gyrus	Dentate gyrus	Neuroblasts	NA	Missing neurotransmitter	159	2004	965	1106	1306	2398
DGNBL2	Neurons	Granule neuroblasts, dentate gyrus	Dentate gyrus	Dentate gyrus	Neuroblasts	NA	Missing neurotransmitter	1445	2426	1674	1796	1937	3270
ENMFB	Vascular	Enteric mesothelial fibroblasts	Enteric nervous system	Enteric nervous system	Enteric glia	NA	Non-neuron	49	2649	2199	857	1780	3057
ENT1	Neurons	Nitrergic enteric neurons	Myenteric plexus of small intestine	Enteric nervous system	Enteric neurons	Nitric oxide	Nitric oxide	14	1923	2890	220	807	3198
ENT2	Neurons	Nitrergic enteric neurons	Myenteric plexus of small intestine	Enteric nervous system	Enteric neurons	Nitric oxide	Nitric oxide	107	4769	6396	508	1460	6709
ENT3	Neurons	Nitrergic enteric neurons	Myenteric plexus of small intestine	Enteric nervous system	Enteric neurons	Nitric oxide	Nitric oxide	155	4325	5110	781	1764	5550
ENT4	Neurons	Cholinergic enteric neurons	Myenteric plexus of small intestine	Enteric nervous system	Enteric neurons	Acetylcholine	Acetylcholine	155	4455	4613	922	1875	5284
ENT5	Neurons	Cholinergic enteric neurons	Myenteric plexus of small intestine	Enteric nervous system	Enteric neurons	Acetylcholine	Acetylcholine	259	3469	3446	1124	1582	4145
ENT6	Neurons	Cholinergic enteric neurons	Myenteric plexus of small intestine	Enteric nervous system	Enteric neurons	Acetylcholine	Acetylcholine	118	3744	4193	638	1290	4716
ENT7	Neurons	Cholinergic enteric neurons, VGLUT2	Myenteric plexus of small intestine	Enteric nervous system	Enteric neurons	Glutamate (VGLUT2),Acetylcholine	Excitatory	31	2868	3405	274	976	3891
ENT8	Neurons	Cholinergic enteric neurons, VGLUT2	Myenteric plexus of small intestine	Enteric nervous system	Enteric neurons	Glutamate (VGLUT2),Acetylcholine	Excitatory	97	3604	5573	466	1315	5920
ENT9	Neurons	Cholinergic enteric neurons	Myenteric plexus of small intestine	Enteric nervous system	Enteric neurons	Acetylcholine	Acetylcholine	169	4498	6260	849	2137	6487
ENTG1	PeripheralGlia	Enteric glia, proliferating	Enteric nervous system	Enteric nervous system	Enteric glia	NA	Non-neuron	163	4367	4436	1380	2744	4994
ENTG2	PeripheralGlia	Enteric glia	Enteric nervous system	Enteric nervous system	Enteric glia	NA	Non-neuron	2160	3393	2919	2796	3130	4411
ENTG3	PeripheralGlia	Enteric glia	Enteric nervous system	Enteric nervous system	Enteric glia	NA	Non-neuron	1135	3896	3292	2508	2765	4555
ENTG4	PeripheralGlia	Enteric glia	Enteric nervous system	Enteric nervous system	Enteric glia	NA	Non-neuron	4044	4000	3504	2711	3309	5076
ENTG5	PeripheralGlia	Enteric glia	Enteric nervous system	Enteric nervous system	Enteric glia	NA	Non-neuron	1132	3604	3029	2498	2776	4346
ENTG6	PeripheralGlia	Enteric glia	Enteric nervous system	Enteric nervous system	Enteric glia	NA	Non-neuron	811	3557	2934	2328	2559	4186
ENTG7	PeripheralGlia	Enteric glia	Enteric nervous system	Enteric nervous system	Enteric glia	NA	Non-neuron	1041	4072	3319	2396	2925	4815
EPEN	Ependymal	Ependymal cells	Brain	Brain	Other CNS glia	NA	Non-neuron	774	5629	5225	2179	3761	6104
EPMB	Ependymal	Ependymal cells, midbrain	Dorsal midbrain pia	Midbrain dorsal	Other CNS glia	NA	Non-neuron	69	1714	1191	934	1824	2166
EPSC	Ependymal	Ependymal cells, spinal cord	Spinal cord	Spinal cord	Other CNS glia	NA	Non-neuron	414	3282	2877	1809	2655	3869
HBADR	Neurons	Adrenergic cell groups of the medulla	Nucleus of the solitary tract, adrenergic cell groups C1-3	Medulla	Cholinergic and monoaminergic neurons	Adrenaline, Glutamate (VGLUT3)	Excitatory	40	3404	2899	304	893	3888
HBCHO1	Neurons	Cholinergic neurons, hindbrain	Medulla (several nuclei)	Medulla	Hindbrain neurons	Acetylcholine,Glutamate (VGLUT2)	Excitatory	10	2348	2687	223	670	3178
HBCHO2	Neurons	Cholinergic neurons, hindbrain	Medial pontine nuclei, reticulotegmental nuclei	Pons	Hindbrain neurons	Acetylcholine, Glutamate (VGLUT2), Nitric oxide	Excitatory	22	4025	5187	127	636	5461
HBCHO3	Neurons	Afferent nuclei of cranial nerves VI-XII	Afferent nuclei of cranial nerves VI-XII	Medulla	Cholinergic and monoaminergic neurons	Acetylcholine, Nitric oxide	Acetylcholine	72	5640	6929	240	1307	7208
HBCHO4	Neurons	Afferent nuclei of cranial nerves III-V	Afferent nuclei of cranial nerves III-V	Pons	Cholinergic and monoaminergic neurons	Acetylcholine, Nitric oxide	Acetylcholine	52	3973	4404	255	650	4975
HBGLU1	Neurons	Excitatory neurons, hindbrain	Inferior olivary complex	Medulla	Di- and mesencephalon excitatory neurons	Glutamate (VGLUT2, VGLUT3)	Excitatory	52	3961	3950	299	855	4686
HBGLU10	Neurons	Excitatory neurons, hindbrain	Nucleus of the solitary tract	Medulla	Spinal cord excitatory neurons	Glutamate (VGLUT2)	Excitatory	80	2296	1452	489	1103	2583
HBGLU2	Neurons	Excitatory neurons, hindbrain	Nucleus of the solitary tract	Medulla	Di- and mesencephalon excitatory neurons	Glutamate (VGLUT2), Nitric oxide	Excitatory	200	5118	5136	491	1667	5811
HBGLU3	Neurons	Excitatory neurons, hindbrain	Nucleus of the solitary tract	Medulla	Di- and mesencephalon excitatory neurons	Glutamate (VGLUT2), Nitric oxide	Excitatory	107	4003	3123	365	1095	4294
HBGLU4	Neurons	Excitatory neurons, hindbrain	Medial vestibular nucleus and Nucleus prepositus	Medulla	Hindbrain neurons	Glutamate (VGLUT2), Nitric oxide	Excitatory	7	2560	2755	194	616	3281
HBGLU5	Neurons	Excitatory neurons, hindbrain	Pontine reticular nucleus, caudal part	Pons	Hindbrain neurons	Glutamate (VGLUT1), Nitric oxide	Excitatory	130	4842	5190	495	1081	5775
HBGLU6	Neurons	Excitatory neurons, hindbrain	Pontine gray	Pons	Hindbrain neurons	Glutamate (VGLUT1,VGLUT2), Nitric oxide	Excitatory	252	5950	6393	690	1746	6783
HBGLU7	Neurons	Excitatory neurons, hindbrain	Tegmental reticular nucleus	Pons	Hindbrain neurons	Glutamate (VGLUT1,VGLUT2), Nitric oxide	Excitatory	275	5789	6023	672	1632	6459
HBGLU8	Neurons	Excitatory neurons, hindbrain	Tegmental reticular nucleus	Pons	Hindbrain neurons	Glutamate (VGLUT1,VGLUT2), Nitric oxide	Excitatory	11	3115	4373	160	692	4666
HBGLU9	Neurons	Excitatory neurons, hindbrain	Spinal nucleus of the trigeminal	Medulla	Hindbrain neurons	Glutamate (VGLUT2)	Excitatory	97	4705	4569	359	1396	5151
HBINH1	Neurons	Inhibitory neurons, hindbrain	Pons, interpeduncular and tegmental nuclei in rh1	Pons	Di- and mesencephalon inhibitory neurons	GABA, Nitric oxide	Inhibitory	13	1335	699	494	868	1540
HBINH2	Neurons	Inhibitory neurons, hindbrain	Nucleus of the solitary tract	Medulla	Hindbrain neurons	GABA, Glycine (GLYT1), Nitric oxide	Inhibitory	22	3826	4585	147	635	5031
HBINH3	Neurons	Inhibitory neurons, hindbrain	Paragigantocellular reticular nucleus	Medulla	Hindbrain neurons	GABA, Glycine (GLYT1,GLYT2)	Inhibitory	127	2855	1791	480	1120	3166
HBINH4	Neurons	Inhibitory neurons, hindbrain	Paragigantocellular reticular nucleus	Medulla	Hindbrain neurons	GABA, Glycine (GLYT1,GLYT2)	Inhibitory	75	3283	2342	376	950	3559
HBINH5	Neurons	Inhibitory neurons, hindbrain	Gigantocellular reticular nucleus	Medulla	Di- and mesencephalon inhibitory neurons	GABA, Glycine (GLYT1,GLYT2)	Inhibitory	480	6528	6671	715	2030	7152
HBINH6	Neurons	Inhibitory neurons, hindbrain	Koelliker-Fuse subnucleus	Pons	Hindbrain neurons	GABA, Glycine (GLYT1)	Inhibitory	62	4454	4348	272	938	5026
HBINH7	Neurons	Inhibitory neurons, hindbrain	Superior olivary complex	Pons	Hindbrain neurons	GABA, Glycine (GLYT1,GLYT2)	Inhibitory	25	3043	2605	235	845	3390
HBINH8	Neurons	Inhibitory neurons, hindbrain	Spinal nucleus of the trigeminal	Medulla	Hindbrain neurons	GABA, Glycine (GLYT1,GLYT2)	Inhibitory	11	2378	2225	213	540	2862
HBINH9	Neurons	Inhibitory neurons, hindbrain	Paragigantocellular reticular nucleus	Medulla	Spinal cord inhibitory neurons	GABA, Glycine (GLYT1,GLYT2)	Inhibitory	98	3341	2421	374	1023	3710
HBNOR	Neurons	Noradrenergic neurons of the medulla	A1-2 noradrenergic cell groups	Medulla	Cholinergic and monoaminergic neurons	Noradrenaline, Nitric oxide	Monoamines	23	2607	2203	276	720	2983
HBSER1	Neurons	Serotonergic neurons, hindbrain	Ventral midbrain/isthmic dorsal raphe (B7), caudal linear nucleus (B8), medial lemniscus (B9), isthmic periaqueductal grey (B4?)	Pons	Cholinergic and monoaminergic neurons	Serotonin, Glutamate (VGLUT3)	Excitatory	105	4408	4581	350	716	5174
HBSER2	Neurons	Serotonergic neurons, hindbrain	Nucleus raphe Pons (B5, B6)	Pons	Cholinergic and monoaminergic neurons	Serotonin, Glutamate (VGLUT3)	Excitatory	109	5104	5819	315	941	6157
HBSER3	Neurons	Serotonergic neurons, hindbrain	Ventral midbrain, rostral pons	Pons	Cholinergic and monoaminergic neurons	Serotonin	Monoamines	87	4027	4108	316	677	4761
HBSER4	Neurons	Serotonergic neurons, hindbrain	Nucleus raphe medulla (pallidus, oscurus, magnus, B1-3)	Medulla	Cholinergic and monoaminergic neurons	Serotonin, Glutamate (VGLUT3)	Excitatory	72	5152	5669	307	1098	6032
HBSER5	Neurons	Serotonergic neurons, hindbrain	Nucleus raphe pons (pallidus, oscurus, magnus, B1-3)	Pons	Cholinergic and monoaminergic neurons	Serotonin	Monoamines	64	4820	5392	252	867	5826
HYPEN	Ependymal	Hypendymal cell, subcommissural organ	Subcommissural organ	Subcommissural organ	Other CNS glia	NA	Non-neuron	111	2276	1636	1180	2048	2647
HYPEP1	Neurons	Peptidergic neurons, hypothalamus	Lateral hypothalamic area	Hypothalamus	Peptidergic neurons	Glutamate (VGLUT2)	Excitatory	191	3523	2191	626	825	3800
HYPEP2	Neurons	Peptidergic neurons, hypothalamus	Paraventricular hypothalamic nucleus	Hypothalamus	Peptidergic neurons	Nitric oxide	Nitric oxide	43	1892	1092	400	714	2115
HYPEP3	Neurons	Peptidergic neurons, hypothalamus	Ventromedial hypothalamic nucleus	Hypothalamus	Peptidergic neurons	Glutamate (VGLUT2), Nitric oxide	Excitatory	152	3546	2270	440	578	3805
HYPEP4	Neurons	Oxytocin-producing cells, hypothalamus	Dorsomedial nucleus of the hypothalamus. magnocellular neurosecretory cells.	Hypothalamus	Peptidergic neurons	Nitric oxide	Nitric oxide	98	2120	1426	401	575	2427
HYPEP5	Neurons	Vasopressin-producing cells, hypothalamus	Paraventricular hypothalamic nucleus magnocellular division and/or Diagonal band nucleus	Hypothalamus	Peptidergic neurons	Glutamate (VGLUT2)	Excitatory	173	2464	1754	610	803	2804
HYPEP6	Neurons	Orexin-producing neurons, hypothalamus	Dorsomedial nucleus of the hypothalamus	Hypothalamus	Cholinergic and monoaminergic neurons	Nitric oxide	Nitric oxide	32	2641	2408	302	625	3134
HYPEP7	Neurons	Pmch neurons, hypothalamus	Lateral hypothalamic area	Hypothalamus	Cholinergic and monoaminergic neurons	Glutamate (VGLUT2)	Excitatory	13	1159	1154	303	596	1615
HYPEP8	Neurons	Peptidergic neurons, hypothalamus	Anteroventral periventricular continue along midline to Medial septal nucleus	Hypothalamus	Peptidergic neurons	Glutamate (VGLUT2)	Excitatory	15	1311	970	476	782	1594
MBCHO1	Neurons	Cholinergic neurons, midbrain red nucleus	Red nucleus	Midbrain ventral	Di- and mesencephalon excitatory neurons	Acetylcholine	Acetylcholine	62	3669	3755	323	778	4381
MBDOP1	Neurons	Dopaminergic neurons, periaqueductal grey	Ventral midbrain, periaqueductal grey	Midbrain ventral	Cholinergic and monoaminergic neurons	Dopamine	Monoamines	57	1937	1211	469	751	2177
MBDOP2	Neurons	Dopaminergic neurons, ventral midbrain (SNc, VTA)	Ventral tegmental area and subtantia nigra	Midbrain ventral	Cholinergic and monoaminergic neurons	Dopamine	Monoamines	63	3309	2614	336	628	3680
MEGLU1	Neurons	Excitatory neurons, midbrain	Superior colliculus, red nucleus	Midbrain dorsal	Di- and mesencephalon excitatory neurons	Glutamate (VGLUT1)	Excitatory	263	5567	5057	492	1103	6048
MEGLU10	Neurons	Excitatory neurons, midbrain	Inferior colliculus	Midbrain dorsal	Di- and mesencephalon excitatory neurons	Glutamate (VGLUT1), Nitric oxide	Excitatory	419	5213	4147	659	895	5656
MEGLU11	Neurons	Excitatory neurons, midbrain	Inferior colliculus	Midbrain dorsal	Di- and mesencephalon excitatory neurons	Glutamate (VGLUT1)	Excitatory	249	5164	4410	557	848	5621
MEGLU14	Neurons	Glutamatergic projection neurons of the raphe nucleus	Dorsal raphe nucleus	Midbrain dorsal	Cholinergic and monoaminergic neurons	Glutamate (VGLUT3)	Excitatory	47	3131	2723	289	567	3558
MEGLU2	Neurons	Excitatory neurons, midbrain	Periaqueductal grey	Midbrain dorsal	Di- and mesencephalon excitatory neurons	Glutamate (VGLUT1)	Excitatory	336	5322	4521	606	904	5719
MEGLU3	Neurons	Excitatory neurons, midbrain	Periaqueductal grey	Midbrain dorsal	Di- and mesencephalon excitatory neurons	Glutamate (VGLUT1)	Excitatory	137	3907	2637	297	486	4153
MEGLU4	Neurons	Excitatory neurons, midbrain	Superior colliculus, sensory related	Midbrain dorsal	Di- and mesencephalon excitatory neurons	Glutamate (VGLUT1), Nitric oxide	Excitatory	136	3746	2420	578	890	4026
MEGLU5	Neurons	Excitatory neurons, midbrain	Superior colliculus, sensory related	Midbrain dorsal	Di- and mesencephalon excitatory neurons	Glutamate (VGLUT1)	Excitatory	281	4872	3931	684	1006	5212
MEGLU6	Neurons	Excitatory neurons, midbrain	Superior colliculus, sensory related, deep layer	Midbrain dorsal	Di- and mesencephalon excitatory neurons	Glutamate (VGLUT1)	Excitatory	143	5233	5034	440	801	5802
MEGLU7	Neurons	Excitatory neurons, midbrain	Inferior colliculus	Midbrain dorsal	Di- and mesencephalon excitatory neurons	Glutamate (VGLUT1)	Excitatory	138	3740	2324	538	993	3937
MEGLU8	Neurons	Excitatory neurons, midbrain	Inferior colliculus	Midbrain dorsal	Di- and mesencephalon excitatory neurons	Glutamate (VGLUT1), Nitric oxide	Excitatory	305	4098	2834	687	969	4527
MEGLU9	Neurons	Excitatory neurons, midbrain	Mantle of inferior colliculus	Midbrain dorsal	Di- and mesencephalon excitatory neurons	Glutamate (VGLUT1), Nitric oxide	Excitatory	243	4355	3333	614	915	4749
MEINH1	Neurons	Inhibitory neurons, midbrain	VTA, Substantia nigra, central nucleus raphe	Midbrain ventral	Hindbrain neurons	GABA, Nitric oxide	Inhibitory	43	1055	505	765	1007	1380
MEINH10	Neurons	Inhibitory neurons, midbrain	Superior colliculus superficial grey layer	Midbrain dorsal	Di- and mesencephalon inhibitory neurons	GABA, Nitric oxide	Inhibitory	792	5827	4901	981	1229	6253
MEINH11	Neurons	Inhibitory neurons, midbrain	Superior colliculus superficial gray layer	Midbrain dorsal	Di- and mesencephalon inhibitory neurons	GABA, Nitric oxide	Inhibitory	101	2396	967	485	549	2595
MEINH12	Neurons	Inhibitory neurons, midbrain	Superior colliculus	Midbrain dorsal	Di- and mesencephalon inhibitory neurons	GABA	Inhibitory	49	2599	1296	324	529	2788
MEINH13	Neurons	Inhibitory neurons, midbrain	Ventral/caudal midbrain (SN, VTA, reticular nucleus)	Midbrain ventral	Di- and mesencephalon inhibitory neurons	GABA	Inhibitory	70	3855	3143	272	678	4220
MEINH14	Neurons	Inhibitory neurons, midbrain	Midbrain reticular nucleus, Darkschewitz nucleus,	Midbrain ventral	Peptidergic neurons	GABA	Inhibitory	21	1413	686	368	488	1584
MEINH2	Neurons	Inhibitory neurons, midbrain	Midbrain	Midbrain dorsal,Midbrain ventral	Di- and mesencephalon inhibitory neurons	GABA	Inhibitory	461	6012	5417	595	1057	6383
MEINH3	Neurons	Inhibitory neurons, midbrain	Dorsal midbrain, medial geniculate nucleus, anteroventral midbrain	Midbrain dorsal	Di- and mesencephalon inhibitory neurons	GABA	Inhibitory	258	5368	4888	469	932	5822
MEINH4	Neurons	Inhibitory neurons, midbrain	Anterior pretectal nucleus	Midbrain dorsal	Di- and mesencephalon inhibitory neurons	GABA, Nitric oxide	Inhibitory	162	4286	3281	384	572	4651
MEINH5	Neurons	Inhibitory neurons, midbrain	Superior colliculus (sparse)	Midbrain dorsal	Di- and mesencephalon inhibitory neurons	GABA	Inhibitory	154	3487	2082	558	895	3748
MEINH6	Neurons	Inhibitory neurons, midbrain	Superior colliculus	Midbrain dorsal	Di- and mesencephalon inhibitory neurons	GABA	Inhibitory	47	3109	2084	351	732	3403
MEINH7	Neurons	Inhibitory neurons, midbrain	Superior colliculus	Midbrain dorsal	Di- and mesencephalon inhibitory neurons	GABA	Inhibitory	69	2772	1695	380	797	2975
MEINH8	Neurons	Inhibitory neurons, midbrain	Superior colliculus superficial grey layer; Erdinger-Westphal nucleus, periaqueductal grey, nucleus of the optic tract	Midbrain dorsal	Di- and mesencephalon inhibitory neurons	GABA	Inhibitory	71	2056	1160	430	829	2319
MEINH9	Neurons	Inhibitory neurons, midbrain	Dorsal midbrain scattered	Midbrain dorsal	Di- and mesencephalon inhibitory neurons	GABA	Inhibitory	400	4019	2517	892	1173	4408
MFOL1	Oligos	Myelin forming oligodendrocytes (MFOL)	Pons/medulla (possible batch effect)	CNS	Oligodendrocytes	NA	Non-neuron	3684	3275	3210	2737	3203	4398
MFOL2	Oligos	Myelin forming oligodendrocytes (MFOL)	CNS	CNS	Oligodendrocytes	NA	Non-neuron	2415	3120	2996	2357	2523	4020
MGL1	Immune	Microglia	CNS	CNS	Immune/Microglia	NA	Non-neuron	2270	1689	1264	2721	2595	3163
MGL2	Immune	Microglia, activated	CNS	CNS	Immune/Microglia	NA	Non-neuron	1820	1872	1431	2681	2585	3139
MGL3	Immune	Microglia, activated	CNS	CNS	Immune/Microglia	NA	Non-neuron	1335	1981	1604	2605	2565	3139
MOL1	Oligos	Mature oligodendrocytes	CNS	CNS	Oligodendrocytes	NA	Non-neuron	8715	2402	2326	1904	2485	3538
MOL2	Oligos	Mature oligodendrocytes, hindbrain	Pons/medulla (possible batch effect)	CNS	Oligodendrocytes	NA	Non-neuron	10011	2807	2915	1952	2776	3928
MOL3	Oligos	Mature oligodendrocytes, spinal cord enriched (high Klk6)	Spinal cord-enriched	CNS	Oligodendrocytes	NA	Non-neuron	1849	3065	3176	2402	2270	4012
MSN1	Neurons	D1 medium spiny neurons, striatum	Striatum dorsal	Striatum dorsal	Telencephalon projecting inhibitory neurons	GABA	Inhibitory	869	4943	4162	1680	1967	5420
MSN2	Neurons	D2 medium spiny neurons, striatum	Striatum dorsal	Striatum dorsal	Telencephalon projecting inhibitory neurons	GABA	Inhibitory	1094	4359	3143	1777	1861	4842
MSN3	Neurons	D2 medium spiny neurons, striatum	Striatum ventral	Striatum ventral	Telencephalon projecting inhibitory neurons	GABA	Inhibitory	1247	3960	2443	1573	1737	4576
MSN4	Neurons	D1 medium spiny neurons, striatum	Striatum ventral	Striatum ventral	Telencephalon projecting inhibitory neurons	GABA	Inhibitory	1584	4522	3044	1559	1788	5133
MSN5	Neurons	Patch D1/D2 neurons, striatum	Striatum ventral	Striatum ventral	Telencephalon projecting inhibitory neurons	GABA	Inhibitory	372	2962	1666	1077	1321	3327
MSN6	Neurons	Matrix D1 neurons, striatum	Striatum ventral	Striatum ventral	Telencephalon projecting inhibitory neurons	GABA	Inhibitory	525	1392	669	1238	1203	2001
NFOL1	Oligos	Newly formed oligodendrocytes (NFOL)	CNS	CNS	Oligodendrocytes	NA	Non-neuron	1612	3406	2969	2264	2331	4131
NFOL2	Oligos	Newly formed oligodendrocytes (NFOL), pons/medulla specific	Pons/medulla (possible batch effect)	CNS	Oligodendrocytes	NA	Non-neuron	181	2631	2177	1518	1984	2999
OBDOP1	Neurons	Dopaminergic periglomerular interneuron, olfactory bulb	Olfactory bulb, periglomerular layer	Olfactory bulb	Olfactory inhibitory neurons	GABA,Dopamine	Inhibitory	371	2190	1160	954	1005	2597
OBDOP2	Neurons	Dopaminergic neurons, olfactory nulb	Olfactory bulb	Olfactory bulb	Olfactory inhibitory neurons	GABA,Dopamine	Inhibitory	281	1517	775	1246	1340	2079
OBINH1	Neurons	Inhibitory neurons, olfactory bulb	Main and accessory olfactory bulb granular layer	Olfactory bulb	Olfactory inhibitory neurons	GABA	Inhibitory	353	1846	814	1132	1095	2311
OBINH2	Neurons	Inner horizontal cell, olfactory bulb	Olfactory bulb, mitral cell layer	Olfactory bulb	Olfactory inhibitory neurons	GABA	Inhibitory	1800	2329	1341	2024	1943	3190
OBINH3	Neurons	Inhibitory neurons, olfactory bulb	Accessory olfactory bulb granular layer	Olfactory bulb	Olfactory inhibitory neurons	GABA	Inhibitory	786	1629	855	1657	1539	2388
OBINH4	Neurons	Inhibitory neurons, olfactory bulb	Olfactory bulb, inner granular layer	Olfactory bulb	Olfactory inhibitory neurons	GABA	Inhibitory	465	1326	609	1475	1386	2051
OBINH5	Neurons	External plexiform layer interneuron, olfactory bulb	Olfactory bulb, outer plexiform layer	Olfactory bulb	Olfactory inhibitory neurons	GABA	Inhibitory	56	1770	954	544	822	1960
OBNBL1	Neurons	Neuroblasts, olfactory	Main olfactory bulb mitral layer, Main olfactory bulb outer plexiform layer	Olfactory bulb	Neuroblasts	Glutamate (VGLUT1)	Excitatory	139	3166	2259	588	942	3554
OBNBL2	Neurons	Neuroblasts, olfactory bulb	Main olfactory bulb mitral layer, Main olfactory bulb outer plexiform layer	Olfactory bulb	Neuroblasts	Glutamate (VGLUT2)	Excitatory	225	2673	1374	811	922	2955
OBNBL3	Neurons	Neuroblasts, olfactory bulb	Olfactory bulb	Olfactory bulb	Neuroblasts	GABA	Inhibitory	2240	1720	904	2289	2167	2995
OBNBL4	Neurons	Inhibitory neurons, olfactory bulb	Main olfactory bulb, glomerular layer	Olfactory bulb	Olfactory inhibitory neurons	GABA	Inhibitory	208	838	402	1141	1000	1455
OBNBL5	Neurons	Inhibitory neurons, olfactory bulb	Main olfactory bulb, glomerular layer and Accessory olfactory bulb, granular layer	Olfactory bulb	Olfactory inhibitory neurons	GABA	Inhibitory	871	1283	583	1594	1318	2116
OEC	Astrocytes	Olfactory ensheathing cells	Olfactory bulb	Olfactory bulb	Other glia	NA	Non-neuron	2031	1984	1497	2556	2716	3456
OPC	Oligos	Oligodendrocytes precursor cells	CNS	CNS	Oligodendrocytes	NA	Non-neuron	820	3596	2127	1719	2616	4235
PER1	Vascular	Pericytes	CNS	CNS	Vascular	NA	Non-neuron	4725	4429	3830	2320	3247	5255
PER2	Vascular	Pericytes, possibly mixed with VENC	CNS	CNS	Vascular	NA	Non-neuron	488	4296	4012	1907	2651	4885
PER3	Vascular	Pericytes	CNS	CNS	Vascular	NA	Non-neuron	298	1541	1002	1615	1994	2327
PSNF1	Neurons	Neurofilament (NF1), DRG	Dorsal root ganglion	Dorsal root ganglion	Peripheral sensory neurons	Glutamate (VGLUT1,VGLUT2)	Excitatory	38	3625	3901	387	1073	4379
PSNF2	Neurons	Neurofilament (NF4/5), DRG	Dorsal root ganglion	Dorsal root ganglion	Peripheral sensory neurons	Glutamate (VGLUT1,VGLUT2)	Excitatory	57	3482	3792	458	1101	4346
PSNF3	Neurons	Neurofilament (NF2/3), DRG	Dorsal root ganglion	Dorsal root ganglion	Peripheral sensory neurons	Glutamate (VGLUT1,VGLUT2)	Excitatory	31	3337	3771	351	1060	4282
PSNP1	Neurons	Non-peptidergic (TH), DRG	Dorsal root ganglion	Dorsal root ganglion	Peripheral sensory neurons	Glutamate (VGLUT2,VGLUT3)	Excitatory	282	5174	6045	1023	1598	6286
PSNP2	Neurons	Non-peptidergic (NP1.1), DRG	Dorsal root ganglion	Dorsal root ganglion	Peripheral sensory neurons	Glutamate (VGLUT2)	Excitatory	72	3770	4583	592	1234	4960
PSNP3	Neurons	Non-peptidergic (NP1.2), DRG	Dorsal root ganglion	Dorsal root ganglion	Peripheral sensory neurons	Glutamate (VGLUT2)	Excitatory	270	4957	6290	1043	1759	6504
PSNP4	Neurons	Non-peptidergic (NP2.1), DRG	Dorsal root ganglion	Dorsal root ganglion	Peripheral sensory neurons	Glutamate (VGLUT2)	Excitatory	45	3228	4191	457	982	4570
PSNP5	Neurons	Non-peptidergic (NP2.2), DRG	Dorsal root ganglion	Dorsal root ganglion	Peripheral sensory neurons	Glutamate (VGLUT2)	Excitatory	88	4137	5094	618	1419	5368
PSNP6	Neurons	Non-peptidergic (NP3), DRG	Dorsal root ganglion	Dorsal root ganglion	Peripheral sensory neurons	Glutamate (VGLUT2)	Excitatory	132	5132	6544	767	1734	6716
PSPEP1	Neurons	Peptidergicv (PEP2), DRG	Dorsal root ganglion	Dorsal root ganglion	Peripheral sensory neurons	Glutamate (VGLUT2), Nitric oxide	Excitatory	78	3844	4026	485	1020	4674
PSPEP2	Neurons	Peptidergic (PEP1.3), DRG	Dorsal root ganglion	Dorsal root ganglion	Peripheral sensory neurons	Glutamate (VGLUT2),Acetylcholine, Nitric oxide	Excitatory	102	4617	5189	556	1347	5566
PSPEP3	Neurons	Peptidergic (PEP1..4), DRG	Dorsal root ganglion	Dorsal root ganglion	Peripheral sensory neurons	Glutamate (VGLUT2)	Excitatory	92	4358	4438	585	1213	5035
PSPEP4	Neurons	Peptidergic (PEP1.1), DRG	Dorsal root ganglion	Dorsal root ganglion	Peripheral sensory neurons	Glutamate (VGLUT2)	Excitatory	117	4233	3932	650	1233	4704
PSPEP5	Neurons	Peptidergic (PEP1.2), DRG	Dorsal root ganglion	Dorsal root ganglion	Peripheral sensory neurons	Glutamate (VGLUT2)	Excitatory	30	2788	2209	400	845	3135
PSPEP6	Neurons	Peptidergic (TrpM8), DRG	Dorsal root ganglion	Dorsal root ganglion	Peripheral sensory neurons	Glutamate (VGLUT2)	Excitatory	54	2954	2465	422	838	3294
PSPEP7	Neurons	Peptidergic (TrpM8), DRG	Dorsal root ganglion	Dorsal root ganglion	Peripheral sensory neurons	Glutamate (VGLUT2)	Excitatory	64	3043	2381	472	993	3400
PSPEP8	Neurons	Peptidergic (TrpM8), DRG	Dorsal root ganglion	Dorsal root ganglion	Peripheral sensory neurons	Glutamate (VGLUT2)	Excitatory	28	3161	2993	304	772	3776
PVM1	Immune	Perivascular macrophages	CNS	CNS	Immune/Microglia	NA	Non-neuron	1390	1855	1373	2726	2765	3312
PVM2	Immune	Perivascular macrophages, activated	CNS	CNS	Immune/Microglia	NA	Non-neuron	639	1798	1342	2271	2491	2867
RGDG	Astrocytes	Dentate gyrus radial glia-like cells	Dentate gyrus subgranular zone	Dentate gyrus	Other CNS glia	NA	Non-neuron	327	1328	778	1603	1837	2220
RGSZ	Astrocytes	Subventricular zone radial glia-like cells	Striatum, rostral migragtory stream, olfactory bulb	Striatum dorsal,Striatum ventral	Other CNS glia	NA	Non-neuron	756	1346	899	1999	2264	2679
SATG1	PeripheralGlia	Satellite glia, proliferating	Dorsal root ganglion	Dorsal root ganglion	Other glia	NA	Non-neuron	30	2076	1633	696	1440	2334
SATG2	PeripheralGlia	Satellite glia	Dorsal root ganglion,Sympathetic ganglion	Dorsal root ganglion,Sympathetic ganglion	Other glia	NA	Non-neuron	654	3015	2554	2209	2470	3742
SCGLU1	Neurons	Excitatory neurons, spinal cord	Dorsal horn lamina 4-6	Spinal cord	Spinal cord excitatory neurons	Glutamate (VGLUT2)	Excitatory	52	1695	912	381	541	1979
SCGLU10	Neurons	Excitatory neurons, spinal cord	Dorsal horn lamina 2-4	Spinal cord	Spinal cord excitatory neurons	Glutamate (VGLUT2)	Excitatory	68	1652	863	523	669	1880
SCGLU2	Neurons	Excitatory neurons, spinal cord	Dorsal horn lamina 4-6	Spinal cord	Spinal cord excitatory neurons	Glutamate (VGLUT2)	Excitatory	133	2624	1449	335	412	2833
SCGLU3	Neurons	Excitatory neurons, spinal cord	Dorsal horn lamina 1-3	Spinal cord	Spinal cord excitatory neurons	Glutamate (VGLUT2)	Excitatory	62	2512	1651	386	687	2800
SCGLU4	Neurons	Excitatory neurons, spinal cord	Dorsal horn lamina 2-3	Spinal cord	Spinal cord excitatory neurons	Glutamate (VGLUT2), Nitric oxide	Excitatory	180	3004	1943	680	873	3272
SCGLU5	Neurons	Excitatory neurons, spinal cord	Dorsal horn, lamina 2-3	Spinal cord	Spinal cord excitatory neurons	Glutamate (VGLUT2)	Excitatory	252	2793	1746	867	1002	3150
SCGLU6	Neurons	Excitatory neurons, spinal cord	Dorsal horn lamina 1-2	Spinal cord	Spinal cord excitatory neurons	Glutamate (VGLUT2)	Excitatory	140	1857	1048	792	1045	2197
SCGLU7	Neurons	Excitatory neurons, spinal cord	Dorsal horn lamina 2-5	Spinal cord	Spinal cord excitatory neurons	Glutamate (VGLUT2)	Excitatory	30	1100	607	536	741	1329
SCGLU8	Neurons	Excitatory neurons, spinal cord	Dorsal horn lamina 2-5	Spinal cord	Spinal cord excitatory neurons	Glutamate (VGLUT2)	Excitatory	15	1385	938	347	582	1605
SCGLU9	Neurons	Excitatory neurons, spinal cord	Dorsal horn lamina 3	Spinal cord	Spinal cord excitatory neurons	Glutamate (VGLUT2)	Excitatory	154	1721	888	804	859	2036
SCHW	PeripheralGlia	Schwann cells	Dorsal root ganglion	Dorsal root ganglion	Other glia	NA	Non-neuron	47	1713	1166	868	1206	1997
SCINH1	Neurons	Inhibitory neurons, spinal cord	Dorsal horn, lamina 2-3,6	Spinal cord	Hindbrain neurons	GABA, Glycine (GLYT2)	Inhibitory	18	2101	1422	280	514	2343
SCINH10	Neurons	Inhibitory neurons, spinal cord	Dorsal horn, lamina 2-6	Spinal cord	Spinal cord inhibitory neurons	GABA, Glycine (GLYT2), Nitric oxide	Inhibitory	65	2198	1145	352	488	2377
SCINH11	Neurons	Central canal neurons, spinal cord	Spinal Cord central canal	Spinal cord	Peptidergic neurons	GABA	Inhibitory	50	1863	1162	488	754	2078
SCINH2	Neurons	Inhibitory neurons, spinal cord	Dorsal horn, lamina 2-6	Spinal cord	Spinal cord inhibitory neurons	GABA, Glycine (GLYT2)	Inhibitory	117	2943	1657	343	464	3184
SCINH3	Neurons	Inhibitory neurons, spinal cord	Dorsal horn, lamina 2-6	Spinal cord	Spinal cord inhibitory neurons	GABA, Glycine (GLYT2)	Inhibitory	66	2508	1631	355	573	2803
SCINH4	Neurons	Inhibitory neurons, spinal cord	Dorsal horn, lamina 3-6	Spinal cord	Spinal cord inhibitory neurons	GABA	Inhibitory	37	1917	1056	352	533	2060
SCINH5	Neurons	Inhibitory neurons, spinal cord	Dorsal horn, lamina 2-6	Spinal cord	Spinal cord inhibitory neurons	GABA, Glycine (GLYT2)	Inhibitory	44	3067	2189	341	556	3406
SCINH6	Neurons	Inhibitory neurons, spinal cord	Dorsal horn, lamina 2-4	Spinal cord	Spinal cord inhibitory neurons	GABA	Inhibitory	87	3287	2575	500	766	3665
SCINH7	Neurons	Inhibitory neurons, spinal cord	Dorsal horn, lamina 2-6	Spinal cord	Spinal cord inhibitory neurons	GABA	Inhibitory	71	1849	1091	520	729	2129
SCINH8	Neurons	Inhibitory neurons, spinal cord	Dorsal horn, lamina 2-6	Spinal cord	Spinal cord inhibitory neurons	GABA	Inhibitory	87	2270	1275	591	834	2499
SCINH9	Neurons	Inhibitory neurons, spinal cord	Dorsal horn, lamina 2-6	Spinal cord	Spinal cord inhibitory neurons	GABA	Inhibitory	84	1781	897	614	743	2006
SEPNBL	Neurons	Neuroblasts, septum	Triangular nucleus of septum	Pallidum	Neuroblasts	Glutamate (VGLUT1)	Excitatory	117	1845	742	503	464	2062
SYCHO1	Neurons	Cholinergic neurons, sympathetic	Sympathetic ganglion	Sympathetic ganglion	Sympathetic neurons	Acetylcholine, Noradrenaline	Monoamines	15	2541	3333	279	687	3905
SYCHO2	Neurons	Cholinergic neurons, sympathetic	Sympathetic ganglion	Sympathetic ganglion	Sympathetic neurons	Acetylcholine, Noradrenaline	Monoamines	75	3712	4733	441	941	5123
SYNOR1	Neurons	Noradrenergic erector muscle neurons	Sympathetic ganglion	Sympathetic ganglion	Sympathetic neurons	Noradrenaline	Monoamines	97	3790	4667	561	1029	5015
SYNOR2	Neurons	Noradrenergic neurons, sympathetic	Sympathetic ganglion	Sympathetic ganglion	Sympathetic neurons	Noradrenaline	Monoamines	62	3550	4445	493	1021	4855
SYNOR3	Neurons	Noradrenergic neurons, sympathetic	Sympathetic ganglion	Sympathetic ganglion	Sympathetic neurons	Noradrenaline	Monoamines	409	4861	6244	1117	1578	6509
SYNOR4	Neurons	Noradrenergic erector muscle neurons	Sympathetic ganglion	Sympathetic ganglion	Sympathetic neurons	Noradrenaline	Monoamines	182	4211	5718	750	1289	5933
SYNOR5	Neurons	Noradrenergic erector muscle neurons	Sympathetic ganglion	Sympathetic ganglion	Sympathetic neurons	Noradrenaline	Monoamines	46	2791	2702	504	922	3356
SZNBL	Neurons	Neuronal intermidate progenitor cells	Sub ventricular zone, Dentate gyrus	Striatum dorsal, Striatum ventral, Dentate gyrus	Neuroblasts	NA	Missing neurotransmitter	971	2814	2146	2069	2614	3688
TECHO	Neurons	Cholinergic interneurons, telencephalon	Striatum,Amygdala	Striatum dorsal, Striatum ventral,Amygdala	Cholinergic and monoaminergic neurons	Acetylcholine, Glutamate (VGLUT3), Nitric oxide	Excitatory	121	4024	3545	357	496	4673
TEGLU1	Neurons	Excitatory neurons, cerebral cortex	Cingulate/Retrosplenial area, layer 6	Cortex	Telencephalon projecting excitatory neurons	Glutamate (VGLUT1, VGLUT3)	Excitatory	402	4086	2599	904	999	4461
TEGLU10	Neurons	Excitatory neurons, cerebral cortex	Cortical pyramidal layer 5	Cortex	Telencephalon projecting excitatory neurons	Glutamate (VGLUT1)	Excitatory	866	6698	7178	1141	1689	7590
TEGLU11	Neurons	Excitatory neurons, cerebral cortex	Cortical pyramidal (poor markers)	Cortex	Telencephalon projecting excitatory neurons	Glutamate (VGLUT1)	Excitatory	1464	6681	6917	1378	1736	7474
TEGLU12	Neurons	Excitatory neurons, cerebral cortex	Lateral cortex layer 6: gustatory, barrel field, auditory	Cortex	Telencephalon projecting excitatory neurons	Glutamate (VGLUT1,VGLUT2)	Excitatory	386	4539	3897	960	1313	5084
TEGLU13	Neurons	Excitatory neurons, cerebral cortex	Subiculum	Cortex	Telencephalon projecting excitatory neurons	Glutamate (VGLUT1,VGLUT2), Nitric oxide	Excitatory	127	5175	4626	527	1106	5649
TEGLU14	Neurons	Excitatory neurons, cerebral cortex	Subiculum	Cortex	Telencephalon projecting excitatory neurons	Glutamate (VGLUT1)	Excitatory	35	3753	3875	282	784	4504
TEGLU15	Neurons	Excitatory neurons, cerebral cortex	Piriform pyramidal	Cortex	Telencephalon projecting excitatory neurons	Glutamate (VGLUT1,VGLUT2)	Excitatory	186	5554	5805	635	1335	6343
TEGLU16	Neurons	Excitatory neurons, cerebral cortex	Piriform pyramidal	Cortex	Telencephalon projecting excitatory neurons	Glutamate (VGLUT1), Nitric oxide	Excitatory	61	3986	3893	442	1048	4728
TEGLU17	Neurons	Excitatory neurons, cerebral cortex	Piriform pyramidal	Cortex	Telencephalon projecting excitatory neurons	Glutamate (VGLUT1)	Excitatory	784	6493	6382	1165	1682	7219
TEGLU18	Neurons	Excitatory neurons, cerebral cortex	Anterior olfactory nucleus, deep layer	Cortex	Telencephalon projecting excitatory neurons	Glutamate (VGLUT1)	Excitatory	657	6392	6127	1030	1414	7023
TEGLU19	Neurons	Excitatory neurons, cerebral cortex	Anterior olfactory nucleus and ventral striatum	Cortex	Telencephalon projecting excitatory neurons	Glutamate (VGLUT1)	Excitatory	89	4349	3392	404	806	4753
TEGLU2	Neurons	Excitatory neurons, cerebral cortex	Cortex pyramidal layer 6b	Cortex	Telencephalon projecting excitatory neurons	Glutamate (VGLUT1)	Excitatory	274	5412	5026	752	1137	5947
TEGLU20	Neurons	Excitatory neurons, cerebral cortex	Cortex pyramidal layer 6	Cortex	Telencephalon projecting excitatory neurons	Glutamate (VGLUT1)	Excitatory	55	3992	4005	321	899	4681
TEGLU21	Neurons	Excitatory neurons, hippocampus CA1	CA1 (posterior),subiculum,entorhinal	Hippocampus	Telencephalon projecting excitatory neurons	Glutamate (VGLUT1), Nitric oxide	Excitatory	104	4840	4620	418	866	5431
TEGLU22	Neurons	Excitatory neurons, amygdala	Basolateral amygdala	Amygdala	Telencephalon projecting excitatory neurons	Glutamate (VGLUT1)	Excitatory	958	5403	4949	1329	1818	6037
TEGLU23	Neurons	Excitatory neurons, hippocampus CA3	CA3	Hippocampus	Telencephalon projecting excitatory neurons	Glutamate (VGLUT1), Nitric oxide	Excitatory	484	6226	6794	1000	1639	7218
TEGLU24	Neurons	Excitatory neurons, hippocampus CA1	CA1	Hippocampus	Telencephalon projecting excitatory neurons	Glutamate (VGLUT1), Nitric oxide	Excitatory	2037	6113	6037	1580	1923	6874
TEGLU3	Neurons	Excitatory neurons, cerebral cortex	Cortex pyramidal layer 6	Cortex	Telencephalon projecting excitatory neurons	Glutamate (VGLUT1)	Excitatory	2734	5981	5308	1342	1492	6621
TEGLU4	Neurons	Excitatory neurons, cerebral cortex	Cortex pyramidal layer 5, Cingulate/Retrosplenial area (superficial and deep)	Cortex	Telencephalon projecting excitatory neurons	Glutamate (VGLUT1)	Excitatory	664	6137	6266	1169	2036	6872
TEGLU5	Neurons	Excitatory neurons, cerebral cortex	Entorhinal superficial layers	Cortex	Telencephalon projecting excitatory neurons	Glutamate (VGLUT1,VGLUT2)	Excitatory	126	4692	4280	609	1083	5216
TEGLU6	Neurons	Excitatory neurons, cerebral cortex	Cingulate/Retrosplenial area, layer 2	Cortex	Telencephalon projecting excitatory neurons	Glutamate (VGLUT1,VGLUT2)	Excitatory	598	4060	2537	1209	1327	4475
TEGLU7	Neurons	Excitatory neurons, cerebral cortex	Cortical pyramidal layer 2/3	Cortex	Telencephalon projecting excitatory neurons	Glutamate (VGLUT1)	Excitatory	2435	7160	7625	1588	2101	8147
TEGLU8	Neurons	Excitatory neurons, cerebral cortex	Cortical pyramidal layer 4	Cortex	Telencephalon projecting excitatory neurons	Glutamate (VGLUT1)	Excitatory	3071	6858	7185	1534	2100	7817
TEGLU9	Neurons	Excitatory neurons, cerebral cortex	Cingulate/Retrosplenial area, layer 5	Cortex	Telencephalon projecting excitatory neurons	Glutamate (VGLUT1)	Excitatory	202	4803	3948	630	910	5167
TEINH1	Neurons	Inhibitory neurons, pallidum	Medial septal nucleus and Magnocellular nucleus	Pallidum	Di- and mesencephalon inhibitory neurons	GABA	Inhibitory	576	5652	4696	569	712	6001
TEINH10	Neurons	R-LM border Cck interneurons, cortex/hippocampus	Hippocampus (sr/slm),Cortex	Hippocampus,Cortex	Telencephalon inhibitory interneurons	GABA, Glutamate (VGLUT3)	Ex/In	581	4577	4544	933	1064	5171
TEINH11	Neurons	R-LM border Cck interneurons, cortex/hippocampus	Hippocampus (sr/slm),Cortex	Hippocampus,Cortex	Telencephalon inhibitory interneurons	GABA,Glutamate (VGLUT3), Nitric oxide	Ex/In	660	6322	7015	935	1294	7343
TEINH12	Neurons	Non-border Cck interneurons, cortex/hippocampus	Hippocampus,Cortex	Hippocampus,Cortex	Telencephalon inhibitory interneurons	GABA,Glutamate (VGLUT3)	Ex/In	280	5648	6161	644	915	6545
TEINH13	Neurons	Trilaminar cells, hippocampus	Hippocampus	Hippocampus	Telencephalon inhibitory interneurons	GABA, Glutamate (VGLUT3)	Ex/In	163	4961	5187	471	788	5722
TEINH14	Neurons	CGE-derived neurogliaform cells Cxcl14+, cortex/hippocampus	Hippocampus,Cortex	Hippocampus,Cortex	Telencephalon inhibitory interneurons	GABA	Inhibitory	422	3776	2530	893	1032	4188
TEINH15	Neurons	CGE-derived neurogliaform cells, cortex/hippocampus	Hippocampus,Cortex	Hippocampus,Cortex	Telencephalon inhibitory interneurons	GABA, Nitric oxide	Inhibitory	1069	4823	3698	1294	1527	5363
TEINH16	Neurons	Ivy and MGE-derived neurogliaform cells, cortex/hippocampus	Hippocampus,Cortex	Hippocampus,Cortex	Telencephalon inhibitory interneurons	GABA, Nitric oxide	Inhibitory	644	5208	4714	1017	1167	5709
TEINH17	Neurons	Axo-axonic, cortex/hippocampus	Hippocampus,Cortex	Hippocampus,Cortex	Telencephalon inhibitory interneurons	GABA	Inhibitory	675	4491	3567	947	1082	4941
TEINH18	Neurons	Basket and bistratified cells, cortex/hippocampus	Hippocampus,Cortex	Hippocampus,Cortex	Telencephalon inhibitory interneurons	GABA, Nitric oxide	Inhibitory	547	5253	5123	946	1191	5898
TEINH19	Neurons	Hippocamposeptal projection, cortex/hippocampus	Hippocampus (so),Cortex	Hippocampus,Cortex	Telencephalon inhibitory interneurons	GABA	Inhibitory	1040	6279	6585	971	1095	7000
TEINH2	Neurons	Inhibitory neurons, septal nucleus	Septal nucleus	Striatum dorsal, Striatum ventral	Peptidergic neurons	GABA	Inhibitory	1339	4831	3545	1295	1549	5544
TEINH20	Neurons	Inhibitory interneurons, hippocampus	Hippocampus (sr/slm)	Hippocampus	Telencephalon inhibitory interneurons	GABA	Inhibitory	139	4634	4729	420	690	5292
TEINH21	Neurons	Sleep-active, long-range projection interneurons, cortex/hippocampus	Hippocampus,Cortex	Hippocampus,Cortex	Telencephalon inhibitory interneurons	GABA, Nitric oxide	Inhibitory	385	3559	3072	777	865	4037
TEINH3	Neurons	Inhibitory neurons, telencephalon	Bed nuclei of the stria terminalis posterior division	Pallidum	Peptidergic neurons	GABA	Inhibitory	145	3479	2176	482	629	3758
TEINH4	Neurons	Interneuron-selective interneurons, cortex/hippocampus	Hippocampus,Cortex	Hippocampus,Cortex	Telencephalon inhibitory interneurons	GABA	Inhibitory	645	2983	1698	1046	915	3470
TEINH5	Neurons	Interneuron-selective interneurons, cortex/hippocampus	Hippocampus,Cortex	Hippocampus,Cortex	Telencephalon inhibitory interneurons	GABA, Nitric oxide	Inhibitory	449	3345	1911	883	907	3653
TEINH6	Neurons	Interneuron-selective interneurons, cortex/hippocampus	Hippocampus,Cortex	Hippocampus,Cortex	Telencephalon inhibitory interneurons	GABA	Inhibitory	145	2560	1508	529	661	2791
TEINH7	Neurons	Interneuron-selective interneurons, hippocampus	Hippocampus	Hippocampus	Telencephalon inhibitory interneurons	GABA	Inhibitory	68	2692	1872	431	669	2934
TEINH8	Neurons	Interneuron-selective interneurons, hippocampus	Hippocampus	Hippocampus	Telencephalon inhibitory interneurons	GABA	Inhibitory	57	2246	1260	440	673	2390
TEINH9	Neurons	Non-border Cck interneurons, hippocampus	Hippocampus	Hippocampus	Telencephalon inhibitory interneurons	GABA	Inhibitory	162	3462	3183	570	861	3903
VECA	Vascular	Vascular endothelial cells, arterial	CNS	CNS	Vascular	NA	Non-neuron	109	3263	2478	1271	2422	3622
VECC	Vascular	Vascular endothelial cells, capillary	CNS	CNS	Vascular	NA	Non-neuron	1025	3142	2557	2295	2591	3885
VECV	Vascular	Vascular endothelial cells, venous	CNS	CNS	Vascular	NA	Non-neuron	2780	3497	2928	2574	3060	4477
VLMC1	Vascular	Vascular leptomeningeal cells	CNS	CNS	Vascular	NA	Non-neuron	702	1908	1292	1916	2177	2800
VLMC2	Vascular	Vascular leptomeningeal cells	Olfactory bulb-enriched	CNS	Vascular	NA	Non-neuron	662	2623	2147	1949	2585	3417
VSMCA	Vascular	Vascular smooth muscle cells, arterial	CNS	CNS	Vascular	NA	Non-neuron	1221	1775	1316	2272	2326	2967

## Sheet: 4 - S-LDSC TM
Annotation	P-value	Estimate	Std.error	FWER < 0.05	AD (Jansen, 2019)	ADHD (Demontis, 2017)	AN (Duncan, 2017)	ASD (Grove, 2018)	BIP (PGC, 2018)	CAD (Schunkert, 2011)	CVD (Loh, 2018)	CELIAC (Dubois, 2010)	CROHNS (Jostins, 2012)	DEP (Nagel, 2018)	BP_DIA (Loh, 2018)	EA3 (Lee, 2018)	FG_F (Lagou, 2018)	FI_F (Lagou, 2018)	HBA1C (Wheeler, 2017)	HEIGHT (Loh, 2018)	IBD (Jostins, 2012)	INS (Jansen, 2018)	INT (Savage, 2018)	HDL (Teslovich, 2010)	LDL (Teslovich, 2010)	TG (Teslovich, 2010)	SLE (Bentham, 2015)	MDD (Howard, 2019)	MS (Patsopoulos, 2011)	NEU (Nagel, 2018)	PBC (Cordell, 2015)	RA (Okada, 2014)	RT (Linner, 2019)	SCZ (Pardinas, 2018)	SWB (Okbay, 2016)	BP_SYS (Loh, 2018)	T1D (Bradfield, 2011)	T2D (Loh, 2018)	UC (Jostins, 2012)	WHR (Pulit, 2019)	WHRadjBMI (Loh, 2018)	WORRY (Nagel, 2018)
Brain - neuron	2.42066e-10	2.2489e-08	3.61318e-09	TRUE	0.19875	0.00101962	0.0874491	0.000424796	1.16891e-16	0.0970208	0.446368	0.602625	0.877239	8.20343e-09	0.914688	6.01047e-24	0.0448161	0.53797	0.78397	0.999994	0.858876	3.12874e-07	4.57101e-20	0.744818	0.31497	0.41728	0.735948	1.78934e-09	0.119285	1.33972e-11	0.457529	0.826323	6.61146e-08	4.62413e-16	0.00997921	0.849266	0.0933341	0.77975	0.759256	0.059399	0.997067	3.06264e-14
Brain - oligodendrocyte precursor cell	2.30158e-05	1.63211e-08	4.00526e-09	TRUE	0.431288	0.113669	0.490643	0.105134	9.41704e-07	0.260198	0.80837	0.457799	0.865535	0.083242	0.988839	2.38822e-07	0.141322	0.512095	0.755792	0.994	0.797414	0.0115695	5.08544e-07	0.649703	0.402899	0.1153	0.994135	7.41771e-06	0.153682	0.000138244	0.752089	0.916421	0.0534914	1.21927e-07	0.648759	0.987681	0.346598	0.35808	0.973418	0.0119501	0.835793	3.03705e-07
Pancreas - pancreatic D cell	0.00258388	1.12992e-08	4.04066e-09	FALSE	0.659738	0.124989	0.927043	0.472404	0.000199689	0.230781	0.0976292	0.867633	0.554836	0.133487	0.736151	0.00756493	0.00802543	0.225587	0.103187	0.962256	0.499819	0.329259	4.4251e-05	0.902096	0.0479799	0.449103	0.552307	0.190771	0.60344	0.0253691	0.278153	0.230298	0.125901	0.00165824	0.461384	0.458661	0.017683	0.0175227	0.423975	0.338688	0.966865	0.00160657
Pancreas - pancreatic A cell	0.00365132	1.36318e-08	5.08134e-09	FALSE	0.135513	0.0029299	0.187019	0.0531314	0.000263547	0.388688	0.242348	0.778207	0.918597	0.124167	0.596937	0.00239752	0.0160922	0.0954484	0.108527	0.995253	0.78704	0.0402873	5.52783e-06	0.711259	0.0472892	0.252049	0.706124	0.331816	0.707042	0.0583604	0.774947	0.444023	0.115506	0.000106584	0.0281554	0.451665	0.421172	0.043767	0.698984	0.288126	0.939153	0.00236535
Brain - oligodendrocyte	0.00542233	1.11097e-08	4.36075e-09	FALSE	0.298544	0.773254	0.27155	0.113912	0.199423	0.551188	0.778392	0.700971	0.501118	0.363646	0.990954	6.95063e-05	0.135336	0.881297	0.332468	0.999483	0.50365	0.000810672	0.000235376	0.904505	0.446771	0.565242	0.721457	0.00431638	0.838568	0.0317348	0.302984	0.957598	0.163798	0.000410761	0.361257	0.968063	0.853759	0.151316	0.810124	0.128898	0.840635	0.000790589
Pancreas - type B pancreatic cell	0.00635631	9.95303e-09	3.99444e-09	FALSE	0.851489	0.0455807	0.688154	0.0196226	0.000609894	0.170019	0.121703	0.930126	0.811998	0.0292651	0.643738	0.0396298	0.00787737	0.274499	0.0525606	0.990348	0.851569	0.562239	0.000196293	0.245003	0.00886376	0.0517395	0.387182	0.382278	0.166362	0.128637	0.630441	0.70537	0.25015	0.00673858	0.338503	0.573577	0.17931	0.0805435	0.524586	0.345196	0.870528	0.00189456
Brain - brain pericyte	0.0124499	1.05319e-08	4.69556e-09	FALSE	0.36768	0.734557	0.298534	0.480706	0.286945	0.220512	0.0214203	0.37497	0.830688	0.908591	0.00013972	0.0276262	0.106857	0.362468	0.939354	0.0562156	0.251104	0.0365394	0.253724	0.365125	0.44859	0.229125	0.926322	0.405226	0.868268	0.389661	0.813191	0.95292	0.265552	0.113185	0.437915	0.000688426	0.993369	0.489854	0.0760674	0.26697	0.186603	0.352717
Brain - Bergmann glial cell	0.0140743	1.00603e-08	4.58285e-09	FALSE	0.447192	0.0997746	0.546289	0.0886978	0.01621	0.543805	0.899502	0.969716	0.547177	0.188649	0.859098	4.41771e-06	0.302481	0.977018	0.494504	0.929554	0.835138	0.0690093	0.000160626	0.849698	0.841658	0.860217	0.972784	4.73633e-05	0.800666	0.0569323	0.589621	0.998698	0.0981119	0.000950633	0.559511	0.730271	0.619738	0.587705	0.885582	0.295055	0.955377	0.00185378
Brain - astrocyte	0.0167881	8.23813e-09	3.87654e-09	FALSE	0.730683	0.305131	0.458003	0.117845	0.0185839	0.804918	0.956362	0.722404	0.679963	0.0853118	0.983531	1.55572e-06	0.150255	0.621663	0.495078	0.980047	0.900531	0.0106397	2.68893e-07	0.381499	0.541702	0.446501	0.967316	0.000180904	0.683768	0.00447861	0.81542	0.99907	0.0706984	0.000236364	0.458453	0.965769	0.688643	0.562887	0.864347	0.134313	0.832422	0.00010967
Pancreas - pancreatic PP cell	0.0284859	1.26088e-08	6.6239e-09	FALSE	0.771023	0.00181853	0.317651	0.0596564	0.00121108	0.828982	0.115742	0.727528	0.796083	0.473906	0.363492	0.0679597	0.00605862	0.368436	0.189258	0.998495	0.676061	0.048651	0.00126727	0.758912	0.14488	0.115005	0.67286	0.354556	0.74602	0.167325	0.475749	0.308728	0.095278	0.00181639	0.0451292	0.307595	0.232494	0.00403429	0.7987	0.487874	0.978502	0.00575283
Heart - smooth muscle cell	0.0306916	1.07629e-08	5.75332e-09	FALSE	0.265742	0.248801	0.167252	0.232712	0.307664	0.206592	0.00376871	0.455015	0.817598	0.895961	5.37531e-05	0.290283	0.119616	0.384393	0.775759	0.0399457	0.315828	0.278246	0.423824	0.703334	0.638196	0.113623	0.836148	0.654188	0.810517	0.654943	0.711456	0.966799	0.121749	0.399809	0.749747	0.000327468	0.843154	0.438263	0.17347	0.508826	0.382178	0.751528
Pancreas - pancreatic acinar cell	0.0346406	1.1541e-08	6.35314e-09	FALSE	0.829446	0.00336144	0.104553	0.296057	0.0541732	0.00658568	0.00387008	0.434154	0.733884	0.845109	0.00301729	0.283232	0.061889	0.781195	0.581896	0.46557	0.777199	0.0250322	0.0217406	0.380222	0.0152416	0.137626	0.458018	0.511767	0.816616	0.570438	0.800705	0.379361	0.158206	0.448703	0.938751	0.0407844	0.0985367	0.0044512	0.70488	0.186368	0.178588	0.449058
Marrow - B cell	0.102258	1.00402e-08	7.91323e-09	FALSE	0.635925	0.70182	0.752556	0.926005	0.022097	0.797659	0.586995	6.60512e-05	0.000517839	0.439948	0.6267	0.0086169	0.96414	0.896256	0.460994	0.856583	5.88056e-05	0.747941	0.0490739	0.478593	0.761283	0.954334	0.000209755	0.468413	4.15321e-09	0.268125	0.000181244	1.19378e-07	0.267456	0.200302	0.396654	0.939409	1.41407e-05	0.684676	0.00257185	0.703998	0.655356	0.663634
Large Intestine - enteroendocrine cell	0.110202	6.37406e-09	5.2014e-09	FALSE	0.724026	0.070452	0.504573	0.480303	0.00847706	0.40996	0.0109991	0.953365	0.88848	0.824845	0.303459	0.531281	0.0295515	0.552524	0.494945	0.953359	0.22949	0.610607	0.0471408	0.391145	0.072729	0.366032	0.119036	0.477422	0.756663	0.28451	0.155678	0.782054	0.32754	0.333261	0.550506	0.132308	0.00608678	0.0396234	0.0559465	0.51169	0.766237	0.291477
Spleen - macrophage	0.122473	8.65778e-09	7.44618e-09	FALSE	0.682463	0.639906	0.141529	0.780489	0.0257381	0.919942	0.889766	0.00884203	0.0166305	0.452538	0.862318	0.25156	0.333652	0.993054	0.55891	0.562012	0.00202744	0.446194	0.8163	0.939663	0.63449	0.881682	0.00156061	0.381486	2.86124e-05	0.643286	0.026341	4.06152e-05	0.804692	0.588454	0.427834	0.994326	0.00219993	0.815722	0.0055033	0.931676	0.9745	0.677694
Thymus - immature T cell	0.125484	5.74734e-09	5.00639e-09	FALSE	0.374121	0.793227	0.719585	0.613811	0.00261464	0.974504	0.433169	0.127266	0.0179673	0.920511	0.419679	0.0274701	0.159171	0.440004	0.0298661	0.355105	0.00960469	0.559523	0.445854	0.359853	0.366554	0.675022	0.0427282	0.690364	1.48352e-05	0.64761	0.0158353	2.03469e-06	0.642775	0.426964	0.87682	0.696487	0.0285048	0.100909	0.0547245	0.336261	0.328684	0.942759
Marrow - hematopoietic precursor cell	0.16768	5.51695e-09	5.72669e-09	FALSE	0.0381754	0.23636	0.741652	0.486869	0.00137026	0.0189647	0.0662182	0.158118	0.0592298	0.587123	0.18318	0.0605169	0.93707	0.28851	0.0212614	0.083554	0.138974	0.478874	0.258764	0.213795	0.148866	0.0970302	0.0050737	0.859135	0.0150913	0.828724	0.0608652	0.000620119	0.33369	0.0971697	0.198875	0.154118	0.200309	0.0446849	0.22602	0.00932963	0.0152048	0.965068
Limb Muscle - skeletal muscle satellite cell	0.172547	4.76624e-09	5.04818e-09	FALSE	0.180047	0.756102	0.301632	0.677807	0.415136	0.827284	0.0974749	0.167877	0.015656	0.757832	0.152658	0.178297	0.0273697	0.0223254	0.25471	0.000774325	0.0025358	0.311944	0.368152	0.142628	0.114042	0.0930217	0.511132	0.257434	0.0129531	0.454315	0.342145	0.262878	0.815843	0.503716	0.313375	0.0643113	0.0870843	0.396879	0.0264244	0.170675	0.0314925	0.553642
Kidney - endothelial cell	0.177597	8.59484e-09	9.29611e-09	FALSE	0.158974	0.0639363	0.939618	0.882103	0.857192	0.131805	0.00503154	0.262871	0.875767	0.811185	0.000278598	0.981761	0.991959	0.539918	0.205407	0.229111	0.69329	0.787444	0.753742	0.274314	0.527268	0.566695	0.646772	0.838398	0.952901	0.916476	0.999221	0.836982	0.348685	0.754528	0.731105	0.00620105	0.412642	0.722612	0.385185	0.0816918	0.0880039	0.877547
Limb Muscle - skeletal muscle satellite stem cell	0.186006	5.12542e-09	5.7414e-09	FALSE	0.226103	0.945588	0.304016	0.611666	0.655318	0.276538	0.0374499	0.751254	0.0665895	0.938217	0.0347191	0.258793	0.0245299	0.0169488	0.356044	0.00123676	0.0272295	0.611226	0.332714	0.338504	0.179308	0.0403884	0.389655	0.819323	0.112798	0.91068	0.610703	0.828407	0.911387	0.525368	0.14238	0.0323477	0.658587	0.141277	0.0838509	0.0468384	0.0308988	0.876525
Thymus - leukocyte	0.191608	7.26969e-09	8.33694e-09	FALSE	0.191806	0.563775	0.779814	0.265809	0.36146	0.989154	0.738906	0.211611	0.248089	0.534166	0.866665	0.765346	0.925274	0.67237	0.894925	0.705262	0.297628	0.32016	0.132845	0.445528	0.446355	0.915678	0.00571389	0.792428	0.0322616	0.743826	0.0995295	8.82529e-05	0.0566117	0.729856	0.882928	0.938303	0.00427567	0.0732204	0.514135	0.914611	0.907964	0.284228
Marrow - basophil	0.19978	9.12055e-09	1.08268e-08	FALSE	0.00938749	0.692401	0.420402	0.666303	0.000905209	0.262653	0.478903	0.0435555	0.0730487	0.976837	0.824425	0.206146	0.868312	0.884294	0.1836	0.223472	0.0077939	0.33911	0.131536	0.149999	0.133303	0.656497	0.0257059	0.584677	0.00107349	0.9385	0.169133	0.0126314	0.916955	0.541675	0.650317	0.784767	0.253963	0.0984213	0.0392417	0.252943	0.137552	0.90383
Marrow - immature T cell	0.202501	5.34668e-09	6.42074e-09	FALSE	0.888137	0.776932	0.0674119	0.858055	0.0278827	0.997021	0.7139	0.00245352	0.000684954	0.301161	0.887223	0.68317	0.49636	0.700329	0.0456249	0.988106	0.00374395	0.737418	0.280461	0.862106	0.61166	0.985701	0.00371139	0.567108	3.04166e-08	0.492553	0.00666947	5.37187e-06	0.925211	0.688814	0.617413	0.997563	0.000114905	0.600041	0.011672	0.75662	0.82846	0.875807
Spleen - T cell	0.222365	4.12461e-09	5.39706e-09	FALSE	0.843001	0.557983	0.396345	0.55177	0.0132288	0.997482	0.861311	0.00569995	0.000316662	0.214258	0.895977	0.252482	0.231364	0.190006	0.260489	0.950526	0.000556831	0.764052	0.671651	0.541645	0.953578	0.991187	0.00940484	0.675002	1.85014e-08	0.821761	0.00455938	1.21728e-06	0.86057	0.495204	0.692759	0.995349	0.00199854	0.521089	0.00631241	0.939644	0.780196	0.972373
Marrow - Slamf1-positive multipotent progenitor cell	0.225949	4.0019e-09	5.31988e-09	FALSE	0.0251978	0.430215	0.595762	0.506731	0.000317553	0.0475585	0.352823	0.812347	0.323973	0.868981	0.917524	0.0029297	0.485344	0.530232	0.00856485	0.210838	0.159228	0.210117	0.0596606	0.263697	0.366947	0.166987	0.268335	0.961142	0.0203577	0.934513	0.318747	0.130532	0.583366	0.220564	0.721249	0.907192	0.457011	0.0148896	0.195931	0.179344	0.132039	0.988748
Marrow - granulocytopoietic cell	0.240528	3.65729e-09	5.19055e-09	FALSE	0.677132	0.401196	0.47234	0.661906	0.0125025	0.362281	0.438013	0.550798	0.255645	0.611232	0.625136	0.00338432	0.498867	0.0980391	0.250769	0.0977252	0.154141	0.0876385	0.0172961	0.395662	0.241236	0.060576	0.512796	0.637935	0.146333	0.363972	0.376062	0.0535596	0.915879	0.581892	0.873096	0.739601	0.27067	0.54042	0.11489	0.617493	0.746237	0.720054
Lung - natural killer cell	0.244534	5.23405e-09	7.56594e-09	FALSE	0.686613	0.5791	0.356813	0.790282	0.0681199	0.896999	0.933688	0.000624833	0.0178731	0.156877	0.993469	0.825307	0.941352	0.652672	0.707683	0.976309	0.00342035	0.929326	0.522174	0.881826	0.676532	0.666167	0.00166756	0.440797	6.81791e-05	0.567502	0.011065	0.000152822	0.85065	0.472264	0.533441	0.995409	0.00832943	0.85529	0.0115619	0.462355	0.459171	0.756577
Fat - T cell	0.253956	3.82816e-09	5.78191e-09	FALSE	0.787541	0.738155	0.0682967	0.610655	0.00668395	0.998709	0.933948	0.000338346	4.84324e-05	0.350666	0.999418	0.311714	0.247915	0.339506	0.29618	0.987771	5.7911e-05	0.972572	0.463634	0.888396	0.992168	0.66346	0.0173484	0.65315	1.3012e-09	0.829027	1.45702e-05	1.5044e-06	0.973425	0.386498	0.891212	0.999999	9.40783e-05	0.796741	0.0011228	0.970376	0.865451	0.797025
Heart - unknown cell type	0.266927	3.31899e-09	5.33485e-09	FALSE	0.134739	0.64043	0.406012	0.468622	0.549143	0.697803	0.671784	0.64721	0.683961	0.945168	0.419771	0.527932	0.693748	0.315111	0.714426	0.249158	0.353505	0.516815	0.855547	0.898022	0.0680231	0.459147	0.707594	0.644405	0.32984	0.422502	0.305824	0.941882	0.210105	0.456546	0.34362	0.394808	0.80739	0.993509	0.211192	0.633747	0.750328	0.114898
Lung - monocyte	0.268198	4.21962e-09	6.82486e-09	FALSE	0.0347925	0.57999	0.54857	0.477547	0.0477312	0.101502	0.301421	0.195084	0.0229628	0.610471	0.693271	0.531549	0.839466	0.460348	0.68764	0.728709	0.000109527	0.499123	0.517684	0.478641	0.101342	0.352431	0.0977168	0.907731	0.0328886	0.749389	0.0491009	0.267035	0.995091	0.799109	0.229347	0.643382	0.267712	0.385325	0.000417341	0.621849	0.771629	0.880075
Lung - T cell	0.271822	4.18485e-09	6.89077e-09	FALSE	0.988569	0.523834	0.11551	0.564628	0.00112773	0.993704	0.62643	0.00091317	0.00197183	0.242615	0.874998	0.0372203	0.295867	0.20383	0.466766	0.843705	0.000871362	0.787378	0.682036	0.866587	0.958405	0.986907	0.00130015	0.500337	4.719e-08	0.731473	0.00373732	0.000292539	0.752365	0.340011	0.604543	0.977671	0.00192905	0.368404	0.0477344	0.918286	0.802779	0.779493
Marrow - Slamf1-negative multipotent progenitor cell	0.290394	2.81723e-09	5.10151e-09	FALSE	0.0584083	0.479139	0.592753	0.512467	0.000157898	0.00404137	0.106031	0.281387	0.26874	0.766028	0.562465	0.011196	0.809344	0.527019	0.0291252	0.152043	0.0883522	0.21775	0.0675091	0.186894	0.162804	0.106087	0.0212474	0.913512	0.0102851	0.787846	0.219254	0.0748322	0.757283	0.468222	0.51474	0.33138	0.321026	0.0189993	0.0952652	0.130768	0.0512099	0.968983
Liver - B cell	0.308749	4.06077e-09	8.1313e-09	FALSE	0.0801482	0.892558	0.969082	0.498481	0.00535227	0.762426	0.69132	0.0736727	0.347243	0.894523	0.850664	0.110176	0.194237	0.711898	0.398165	0.95518	0.246553	0.88519	0.0658146	0.228829	0.237172	0.0479245	0.00451825	0.329872	0.00027939	0.830706	0.00296493	0.0041851	0.297849	0.852324	0.86305	0.92262	0.0284183	0.356219	0.180457	0.875718	0.82156	0.83778
Marrow - common lymphoid progenitor	0.309602	2.6595e-09	5.35135e-09	FALSE	0.155269	0.302445	0.855685	0.685634	0.0014648	0.234666	0.0503712	0.322351	0.276676	0.895468	0.271454	0.0354823	0.743349	0.499918	0.0566368	0.0651528	0.185194	0.279756	0.111368	0.276923	0.138821	0.148576	0.0841519	0.977675	0.00569177	0.960945	0.0840297	0.00227918	0.570849	0.0510103	0.747845	0.154239	0.623616	0.0669378	0.195971	0.179484	0.0624186	0.993043
Spleen - B cell	0.360632	2.43511e-09	6.82541e-09	FALSE	0.0363016	0.590885	0.655157	0.52809	0.0175031	0.633459	0.0907312	0.0081313	0.00211976	0.894467	0.119815	0.00892452	0.978661	0.594586	0.879594	0.898978	0.000298243	0.912471	0.00631899	0.210695	0.541628	0.264604	1.43943e-05	0.128628	1.04734e-07	0.574987	3.33048e-05	2.25578e-05	0.319841	0.221419	0.368158	0.228224	0.0124804	0.411341	0.00791366	0.701315	0.486715	0.765551
Fat - unknown cell type	0.408577	1.25313e-09	5.41993e-09	FALSE	0.15965	0.44401	0.865792	0.815775	0.163877	0.38075	0.0335635	0.0256161	0.706403	0.954426	0.285562	0.639879	0.490811	0.685773	0.633523	0.90468	0.174393	0.266422	0.790659	0.476008	0.876976	0.216243	0.0025131	0.489629	0.183881	0.966741	0.043042	0.0107957	0.782221	0.643514	0.305574	0.195942	0.0227031	0.947629	0.149526	0.864545	0.837141	0.996182
Bladder - bladder cell	0.42155	8.21235e-10	4.14911e-09	FALSE	0.990652	0.864822	0.269289	0.645804	0.924925	0.663724	0.879132	0.276569	0.0665036	0.698864	0.407574	0.999468	0.636247	0.655616	0.981695	0.000765613	0.0277114	0.616419	0.946322	0.314651	0.132973	0.373455	0.465054	0.638508	0.125023	0.947763	0.616764	0.145224	0.989917	0.625674	0.937917	0.320359	0.0808398	0.990838	0.0319	0.134744	0.0318286	0.96466
Fat - natural killer cell	0.427656	1.33446e-09	7.31831e-09	FALSE	0.366735	0.960134	0.302962	0.986997	0.0923279	0.895619	0.989282	0.00215296	0.00678216	0.602617	0.984405	0.338222	0.464218	0.832843	0.284283	0.925027	0.000363116	0.836602	0.0982875	0.667299	0.476291	0.284082	0.00213333	0.590963	2.93439e-05	0.687878	0.00226076	0.000587377	0.95737	0.945749	0.255565	0.999935	0.000657926	0.869925	0.00195933	0.747633	0.88805	0.859178
Marrow - megakaryocyte-erythroid progenitor cell	0.446554	7.52084e-10	5.597e-09	FALSE	0.025275	0.406071	0.382969	0.524167	0.000705642	0.00475747	0.0375031	0.75638	0.527881	0.830019	0.730727	0.0364098	0.249182	0.275018	0.00365661	0.257121	0.0600231	0.203137	0.104052	0.0816214	0.0604979	0.0401157	0.325342	0.591433	0.0454461	0.718251	0.210054	0.183501	0.526794	0.418716	0.938408	0.453563	0.334987	0.021813	0.0683211	0.311968	0.113177	0.834356
Marrow - naive B cell	0.457959	6.26561e-10	5.93467e-09	FALSE	0.0430727	0.523535	0.420941	0.664718	0.0468171	0.269792	0.215593	0.0402836	0.00390023	0.956881	0.0743229	0.000219311	0.925801	0.612788	0.910044	0.819232	0.0041164	0.956665	0.0038605	0.408348	0.78514	0.730899	0.000266116	0.240499	1.28024e-05	0.433463	0.00055687	0.000223668	0.228518	0.0581031	0.47303	0.214208	0.0316085	0.234627	0.0287164	0.902488	0.431305	0.711878
Marrow - mature natural killer cell	0.460649	6.43289e-10	6.51117e-09	FALSE	0.769123	0.654324	0.516887	0.81103	0.0106809	0.985962	0.937132	0.0105147	0.00375854	0.404765	0.895635	0.110394	0.201424	0.375253	0.451714	0.946685	0.000243763	0.723166	0.152174	0.37226	0.612629	0.277854	0.00492069	0.449496	3.02473e-06	0.653057	0.0103728	0.000256553	0.603105	0.46123	0.118075	0.976085	0.0035506	0.709224	0.000640861	0.164547	0.311834	0.719294
Marrow - macrophage	0.472901	3.57834e-10	5.26376e-09	FALSE	0.576552	0.230956	0.449655	0.612172	0.012383	0.38144	0.428954	0.0356579	0.130277	0.0736288	0.44785	0.00222064	0.728773	0.584134	0.499086	0.83353	0.0398268	0.156976	0.00117031	0.511531	0.142875	0.405074	0.00267121	0.0462976	0.000956363	0.000263824	0.00724435	0.000716879	0.273953	0.0696243	0.0542642	0.173056	0.180535	0.141436	0.0238658	0.322515	0.259362	0.0582684
Pancreas - pancreatic ductal cell	0.477325	2.61081e-10	4.59103e-09	FALSE	0.156789	0.0442227	0.753807	0.760988	0.339704	0.0210466	0.0266377	0.814855	0.939704	0.378929	0.398059	0.796286	0.0919785	0.137673	0.00748134	0.581468	0.870024	0.928241	0.98271	0.394188	0.242354	0.246592	0.221552	0.056522	0.911942	0.553888	0.179305	0.921002	0.935996	0.357647	0.720062	0.232911	0.555623	0.019554	0.673447	0.554455	0.336674	0.564736
Kidney - leukocyte	0.483061	3.45275e-10	8.1293e-09	FALSE	0.0799698	0.836089	0.667779	0.110456	0.00636795	0.914239	0.759824	0.000645788	0.0107173	0.389423	0.990425	0.674565	0.915918	0.825726	0.581396	0.447704	0.000946579	0.532813	0.317398	0.252689	0.157788	0.529444	0.000100469	0.935319	0.000169	0.670021	0.00200454	0.000397309	0.835128	0.202982	0.867511	0.971076	0.0133639	0.93933	0.00161776	0.282566	0.153342	0.94618
Pancreas - pancreatic stellate cell	0.495525	5.756e-11	5.13098e-09	FALSE	0.926505	0.809133	0.248489	0.87219	0.993126	0.133471	0.00580856	0.138982	0.618861	0.913015	8.19984e-05	0.910387	0.060244	0.035976	0.888543	5.63176e-05	0.235739	0.474983	0.995784	0.309463	0.0282065	0.0959599	0.983849	0.902296	0.963513	0.985668	0.738458	0.823592	0.74069	0.771028	0.813357	0.000139919	0.204915	0.749283	0.215646	0.026255	0.00358241	0.986519
Marrow - immature NK T cell	0.538648	-5.71463e-10	5.88969e-09	FALSE	0.169283	0.824895	0.0301197	0.765613	0.0120887	0.998308	0.998642	0.012968	0.0174126	0.302242	0.993402	0.818714	0.839195	0.681018	0.513715	0.931889	0.00363627	0.933722	0.232719	0.340507	0.185958	0.763427	0.00353832	0.985672	2.04546e-09	0.832206	0.00608892	3.76181e-05	0.795296	0.954168	0.506514	0.999978	0.00165065	0.993076	0.0220798	0.834727	0.816299	0.992873
Marrow - granulocyte	0.545616	-5.49985e-10	4.79952e-09	FALSE	0.0136029	0.163982	0.202342	0.0224887	0.0824064	0.480468	0.541415	0.344001	0.0903961	0.502422	0.859217	0.24501	0.877951	0.854295	0.440889	0.915925	0.0382317	0.262551	0.101243	0.3885	0.157945	0.182186	0.497417	0.425411	0.145239	0.107508	0.663808	0.0651066	0.963585	0.725662	0.316127	0.985501	0.423232	0.952389	0.0836676	0.856157	0.977622	0.572138
Lung - leukocyte	0.554128	-8.98126e-10	6.59908e-09	FALSE	0.0536984	0.497697	0.323137	0.331007	0.0929632	0.739946	0.126513	0.256784	0.0657638	0.821109	0.505583	0.638921	0.975257	0.810544	0.709752	0.648984	0.00102677	0.318249	0.36492	0.479734	0.0120946	0.63669	0.55999	0.553809	0.00547362	0.599416	0.343391	0.0940459	0.986206	0.597485	0.968983	0.669592	0.658418	0.371328	0.00659122	0.815332	0.93804	0.765012
Marrow - immature B cell	0.558872	-7.29344e-10	4.92436e-09	FALSE	0.0312569	0.774257	0.585693	0.525798	0.00210988	0.470729	0.0590087	0.100645	0.00299802	0.925682	0.0648903	0.0152296	0.632907	0.786328	0.688862	0.824321	0.00158738	0.886957	0.0410314	0.153572	0.54338	0.153328	0.000120102	0.529694	3.27559e-08	0.336217	0.000142806	4.14132e-07	0.353231	0.0201032	0.225482	0.096599	0.00844722	0.347613	0.0100631	0.683389	0.316483	0.771193
Marrow - pre-natural killer cell	0.580611	-1.30962e-09	6.43687e-09	FALSE	0.568482	0.566718	0.277052	0.706726	8.38541e-05	0.949126	0.469661	0.0388689	0.0421087	0.861061	0.609692	0.0117202	0.127377	0.448146	0.0523205	0.465943	0.0105976	0.602039	0.111168	0.462841	0.142555	0.138758	0.140234	0.574756	3.75229e-05	0.89978	0.0560865	0.0120788	0.802535	0.077315	0.771446	0.578358	0.085477	0.292653	0.0189125	0.662746	0.548784	0.975721
Lung - unknown cell type	0.586356	-1.56618e-09	7.17838e-09	FALSE	0.924795	0.503563	0.734702	0.737153	0.425225	0.518612	0.526303	0.626431	0.506708	0.588519	0.0518796	0.239164	0.0613905	0.333528	0.129266	0.977495	0.270489	0.4171	0.418902	0.547168	0.354795	0.637068	0.728509	0.12306	0.89411	0.0579273	0.998358	0.554942	0.0905312	0.498348	0.892882	0.362943	0.0256015	0.541659	0.440163	0.287055	0.239952	0.0734614
Pancreas - leukocyte	0.588673	-1.71778e-09	7.66414e-09	FALSE	0.0395563	0.926308	0.228426	0.0441935	0.347609	0.94076	0.0188533	0.0212603	0.00132033	0.984008	0.29295	0.540888	0.518794	0.956736	0.725998	0.992393	0.00035469	0.587151	0.250618	0.261106	0.446774	0.277204	0.0238808	0.761835	0.00071088	0.982843	0.00371773	0.00983824	0.99956	0.670188	0.191895	0.467294	0.00247369	0.942119	0.00711314	0.567695	0.499485	0.986799
Liver - natural killer cell	0.6273	-2.25146e-09	6.93376e-09	FALSE	0.238503	0.664361	0.609852	0.379394	0.139468	0.99248	0.768514	0.0187212	0.00401958	0.650558	0.82766	0.67578	0.981618	0.556971	0.0753908	0.977901	0.000889169	0.935524	0.598855	0.358643	0.144126	0.050207	0.00454112	0.751348	2.23883e-05	0.665763	0.00065204	1.52225e-05	0.978578	0.96653	0.833945	0.991798	0.00275205	0.907911	0.00537686	0.623438	0.420116	0.853548
Mammary Gland - luminal epithelial cell of mammary gland	0.647774	-1.73302e-09	4.5688e-09	FALSE	0.145677	0.712261	0.954669	0.435799	0.319743	0.123412	0.602749	0.877691	0.74427	0.998594	0.888615	0.798224	0.363905	0.742219	0.349605	0.511484	0.215804	0.795091	0.967318	0.261605	0.288523	0.630982	0.322289	0.777714	0.757052	0.998652	0.373969	0.117841	0.807351	0.535721	0.793587	0.880195	0.119461	0.230082	0.231444	0.952656	0.777783	0.999508
Kidney - macrophage	0.648191	-2.85235e-09	7.49747e-09	FALSE	0.000936562	0.302446	0.780897	0.510381	0.657967	0.31518	0.368628	0.0174799	0.00213104	0.860612	0.680049	0.877497	0.926829	0.968176	0.201235	0.909898	0.00507902	0.749323	0.536823	0.26728	0.178917	0.225586	0.000482346	0.626864	0.00332571	0.677682	0.00313509	0.00939051	0.998482	0.36332	0.120467	0.545107	0.00586199	0.877863	0.0213034	0.317325	0.145417	0.737863
Skin - keratinocyte stem cell	0.650224	-2.00445e-09	5.1939e-09	FALSE	0.28061	0.755169	0.00508365	0.0953683	0.366449	0.0383053	0.683372	0.694043	0.856145	0.538136	0.90623	0.962077	0.465127	0.852066	0.240566	0.226014	0.888843	0.913443	0.917736	0.495131	0.399588	0.0156088	0.27591	0.848475	0.984058	0.979051	0.916619	0.464518	0.701741	0.419972	0.936628	0.858993	0.251318	0.219251	0.621837	0.412952	0.220935	0.908996
Fat - mesenchymal stem cell of adipose	0.666412	-1.84723e-09	4.29562e-09	FALSE	0.930877	0.963779	0.702528	0.53349	0.992744	0.365691	0.538641	0.466381	0.222815	0.924384	0.116922	0.792443	0.514685	0.410298	0.889155	0.000223404	0.0594911	0.427584	0.966559	0.205633	0.324748	0.0973947	0.857326	0.978527	0.220608	0.959982	0.646334	0.615999	0.970119	0.848675	0.110399	0.0260811	0.223424	0.872112	0.0264071	0.00394222	0.000202953	0.974087
Lung - classical monocyte	0.669412	-3.11699e-09	7.11168e-09	FALSE	0.0818522	0.828537	0.608559	0.21418	0.236164	0.24768	0.266144	0.798929	0.558395	0.934551	0.950203	0.352013	0.886775	0.678736	0.247285	0.873711	0.0313174	0.498709	0.272282	0.440072	0.181587	0.622824	0.0547862	0.957191	0.094515	0.908557	0.0201532	0.411471	0.984633	0.900558	0.699567	0.902661	0.209496	0.998195	0.0173788	0.29009	0.307602	0.986847
Trachea - epithelial cell	0.674566	-1.93284e-09	4.27095e-09	FALSE	0.189108	0.136138	0.798489	0.843334	0.86097	0.26572	0.322577	0.455357	0.608538	0.958036	0.0787001	0.836994	0.391239	0.0926879	0.469661	0.911846	0.51683	0.561061	0.748735	0.948225	0.553614	0.703799	0.298123	0.997648	0.487519	0.976649	0.788245	0.945821	0.269294	0.910284	0.649462	0.331309	0.155265	0.858083	0.227933	0.603753	0.647115	0.688739
Marrow - immature natural killer cell	0.679534	-3.08128e-09	6.60656e-09	FALSE	0.260631	0.981335	0.335145	0.96549	0.00176199	0.920683	0.688061	0.00319042	0.0268831	0.402139	0.924504	0.066845	0.97284	0.889407	0.494141	0.72606	0.00169547	0.942859	0.595904	0.657606	0.363516	0.766194	0.00302061	0.725025	1.41853e-05	0.670294	0.0137435	0.00014715	0.897591	0.978501	0.564429	0.889339	0.000326722	0.550739	0.00582463	0.882483	0.868115	0.844341
Marrow - granulocyte monocyte progenitor cell	0.68102	-2.51246e-09	5.33938e-09	FALSE	0.0547974	0.489013	0.264338	0.208019	0.00215607	0.224039	0.598133	0.386964	0.168338	0.873871	0.855444	0.00979115	0.277825	0.67326	0.0499395	0.634979	0.0100683	0.154328	0.408802	0.387009	0.181971	0.241227	0.0166929	0.755944	0.000262306	0.826241	0.0125396	0.0150934	0.472324	0.359023	0.35865	0.707164	0.0737592	0.0626851	0.0114561	0.563685	0.240927	0.963239
Heart - myofibroblast cell	0.681189	-2.28857e-09	4.8587e-09	FALSE	0.653903	0.37419	0.729553	0.307608	0.576349	0.271674	0.00100614	0.126165	0.848071	0.584532	1.42731e-05	0.140913	0.137628	0.883119	0.4341	0.0246983	0.0953264	0.281139	0.91644	0.301698	0.410291	0.516117	0.344083	0.528697	0.746376	0.712286	0.2849	0.656445	0.791342	0.42002	0.303332	2.94607e-05	0.38254	0.95641	0.0340072	0.503558	0.252451	0.660427
Brain - macrophage	0.700026	-3.43038e-09	6.54057e-09	FALSE	0.0063124	0.564448	0.421476	0.340145	0.0735158	0.907074	0.0936741	0.247246	0.0506341	0.893409	0.566912	0.207379	0.57283	0.950629	0.778214	0.866858	0.00921047	0.109371	0.296119	0.0900831	0.0399043	0.456022	0.0114229	0.811342	0.0585466	0.835752	0.0148074	0.726085	0.995608	0.475452	0.873305	0.397885	0.0561451	0.849202	0.0075299	0.839814	0.67356	0.676889
Brain - microglial cell	0.711883	-2.63478e-09	4.71427e-09	FALSE	0.0552502	0.554117	0.0938218	0.114506	0.34503	0.967453	0.066384	0.397591	0.0446845	0.834767	0.162505	0.642229	0.730542	0.991415	0.61017	0.98403	0.0864407	0.396336	0.249015	0.394946	0.108399	0.799758	0.0211318	0.475534	0.337866	0.909222	0.0547308	0.346615	0.981696	0.438919	0.970238	0.102032	0.107591	0.756979	0.100705	0.634407	0.362931	0.555951
Fat - B cell	0.714619	-3.58156e-09	6.31747e-09	FALSE	0.0336645	0.616996	0.191908	0.264142	0.106858	0.83892	0.158565	0.0574591	0.00359386	0.875465	0.221118	0.0268561	0.972208	0.521622	0.903139	0.877339	0.0048229	0.722294	0.00828746	0.475094	0.910473	0.673665	0.000921465	0.181513	3.26086e-06	0.701421	0.000105132	2.97701e-05	0.347702	0.256704	0.843936	0.493053	0.0354796	0.449394	0.0283161	0.974518	0.769352	0.929184
Marrow - late pro-B cell	0.739039	-2.77543e-09	4.33401e-09	FALSE	0.370735	0.625162	0.680404	0.430449	0.000804498	0.317097	0.155179	0.477153	0.479333	0.926798	0.539784	0.00187509	0.374486	0.337723	0.199056	0.615998	0.165822	0.0417433	0.0845068	0.318008	0.345396	0.0967449	0.0196815	0.492508	0.00318402	0.439809	0.0535085	0.00123627	0.338081	0.072791	0.394401	0.479942	0.213489	0.0372937	0.215846	0.780109	0.693179	0.895058
Trachea - mesenchymal cell	0.74004	-2.68581e-09	4.17395e-09	FALSE	0.15291	0.98245	0.0618087	0.591635	0.99648	0.848988	0.752337	0.310549	0.0552492	0.978338	0.336888	0.868511	0.316414	0.721353	0.917862	9.54337e-09	0.0249909	0.808179	0.665824	0.662332	0.350194	0.296659	0.770818	0.983836	0.0583028	0.999457	0.331264	0.352602	0.999213	0.955465	0.347088	0.254474	0.139244	0.885808	0.0168928	0.00501008	0.000129261	0.944565
Lung - epithelial cell of lung	0.759026	-3.63117e-09	5.16397e-09	FALSE	0.140697	0.0824007	0.705913	0.739322	0.165175	0.583829	0.568426	0.534512	0.309546	0.990029	0.241316	0.912921	0.430586	0.255892	0.587237	0.997849	0.535921	0.913154	0.623587	0.129738	0.467529	0.537614	0.573671	0.997685	0.651296	0.999117	0.960476	0.962946	0.460398	0.843313	0.691979	0.628293	0.0138742	0.571631	0.842077	0.494009	0.109638	0.992605
Lung - B cell	0.761106	-5.59151e-09	7.87686e-09	FALSE	0.249368	0.763013	0.729803	0.558764	0.13079	0.838743	0.788596	0.0641626	0.00960931	0.831024	0.274251	0.0350012	0.799675	0.793378	0.640759	0.836844	0.00140132	0.961776	0.0113447	0.34495	0.99385	0.712184	0.000234463	0.331509	3.69717e-05	0.653007	0.000825284	9.06758e-05	0.535741	0.243606	0.73203	0.785286	0.00677084	0.266648	0.015403	0.732531	0.339878	0.81329
Trachea - blood cell	0.762749	-3.70755e-09	5.18413e-09	FALSE	0.0032043	0.864372	0.118117	0.79906	0.0980539	0.989338	0.392862	0.000105916	1.87172e-06	0.745604	0.949621	0.341573	0.845673	0.86176	0.931068	0.974431	6.18304e-07	0.44453	0.404779	0.192788	0.515161	0.50319	0.000503487	0.101176	3.59133e-08	0.592731	0.000153043	6.63674e-07	0.768431	0.31268	0.273453	0.940598	0.00314414	0.840618	0.000112781	0.936613	0.715279	0.871913
Kidney - kidney collecting duct epithelial cell	0.765641	-5.15292e-09	7.11174e-09	FALSE	0.743596	0.526239	0.555929	0.345001	0.93455	0.0784181	0.0102503	0.48773	0.930013	0.98373	0.0120882	0.67431	0.760643	0.25778	0.155635	0.985216	0.740617	0.983889	0.96079	0.143574	0.332483	0.6954	0.330454	0.686818	0.204387	0.981219	0.616037	0.626716	0.974822	0.801656	0.788377	0.0323429	0.769887	0.312946	0.273322	0.549616	0.456808	0.995334
Tongue - keratinocyte	0.767154	-3.24569e-09	4.44916e-09	FALSE	0.212742	0.766942	0.234535	0.626694	0.267259	0.173443	0.77721	0.44582	0.374685	0.721388	0.998651	0.815582	0.902613	0.915267	0.140371	0.964105	0.0836225	0.240688	0.8919	0.14338	0.300722	0.679236	0.0725824	0.653652	0.78109	0.940754	0.0797911	0.367482	0.73175	0.912688	0.564029	0.999133	0.258038	0.19526	0.123209	0.941333	0.978447	0.987876
Limb Muscle - B cell	0.781326	-5.62926e-09	7.24786e-09	FALSE	0.0929257	0.51123	0.544098	0.170887	0.504468	0.970263	0.373303	0.396006	0.00234088	0.638869	0.381294	0.0159478	0.997197	0.397081	0.957579	0.999253	0.00201243	0.649266	0.00148115	0.876986	0.929705	0.8431	0.00483554	0.129403	6.36421e-06	0.455188	0.000915717	0.000140523	0.166214	0.0587853	0.525927	0.489465	0.0161541	0.769091	0.0184561	0.963179	0.471133	0.950683
Marrow - monocyte	0.785869	-4.23929e-09	5.35149e-09	FALSE	0.0537768	0.781605	0.484836	0.111562	0.0143878	0.512112	0.247267	0.756437	0.280217	0.94027	0.953279	0.193935	0.576153	0.866805	0.279249	0.947233	0.0365761	0.0744762	0.290407	0.335239	0.181863	0.303489	0.124383	0.757894	0.027094	0.735733	0.0710605	0.0925937	0.780624	0.701678	0.505846	0.875109	0.461424	0.949481	0.0157007	0.512432	0.314706	0.934887
Large Intestine - large intestine goblet cell	0.796576	-3.04353e-09	3.66932e-09	FALSE	0.209601	0.710175	0.806535	0.477843	0.0404427	0.532117	0.839272	0.881526	0.681505	0.974256	0.959981	0.901818	0.112986	0.692464	0.0118157	0.997427	0.392497	0.979747	0.848926	0.244538	0.00978742	0.885163	0.154827	0.991049	0.494707	0.995894	0.0890859	0.544126	0.907577	0.990625	0.831319	0.994195	0.507273	0.240337	0.277905	0.999969	0.99967	0.98676
Mammary Gland - basal cell	0.800274	-4.08879e-09	4.8526e-09	FALSE	0.213957	0.782533	0.597769	0.164104	0.48512	0.0295288	0.926289	0.848146	0.394745	0.984659	0.90615	0.60401	0.703248	0.507608	0.942035	0.282823	0.0913007	0.52181	0.987111	0.119624	0.100544	0.216424	0.470897	0.479095	0.608929	0.977674	0.275152	0.730366	0.951002	0.620771	0.184901	0.970141	0.329298	0.78892	0.304135	0.334653	0.402714	0.892673
Lung - stromal cell	0.804039	-3.58299e-09	4.18507e-09	FALSE	0.942436	0.976682	0.778297	0.920796	0.951027	0.378864	0.17259	0.354814	0.0410996	0.968255	0.0276113	0.999899	0.237248	0.0506631	0.957336	5.80158e-05	0.0554013	0.441666	0.999892	0.205498	0.185705	0.264799	0.990906	0.98262	0.490128	0.997615	0.853866	0.988791	0.995713	0.707265	0.537872	0.00472879	0.234783	0.949546	0.144903	0.119384	0.0164601	0.992787
Trachea - endothelial cell	0.815268	-4.7388e-09	5.28014e-09	FALSE	0.13415	0.27772	0.890202	0.697926	0.686748	0.190841	0.0434225	0.0962305	0.270525	0.136172	0.00456288	0.466586	0.999187	0.700788	0.431939	0.170391	0.106262	0.238584	0.0866568	0.189574	0.30033	0.183042	0.338792	0.270485	0.304336	0.587751	0.731029	0.22503	0.2853	0.269236	0.629063	0.0131379	0.111427	0.870611	0.0497669	0.477218	0.0996154	0.506567
Liver - Kupffer cell	0.82774	-6.91193e-09	7.3121e-09	FALSE	0.090444	0.316046	0.957773	0.473489	0.986489	0.152211	0.311134	0.701585	0.942849	0.904615	0.818379	0.962702	0.0836026	0.560614	0.175861	0.699788	0.448676	0.512852	0.98451	0.0441722	0.0266017	0.0115808	0.00890932	0.610056	0.0472571	0.573686	0.240442	0.373862	0.636973	0.874589	0.432249	0.811163	0.536958	0.650717	0.285215	0.900129	0.665116	0.575592
Brain - endothelial cell	0.832223	-4.63377e-09	4.81187e-09	FALSE	0.27091	0.976819	0.493949	0.975829	0.958399	0.0781042	0.0441978	0.583704	0.948763	0.988096	0.007739	0.997009	0.685197	0.59146	0.550596	0.126761	0.650942	0.466364	0.994419	0.169769	0.257407	0.2723	0.574258	0.962213	0.904103	0.988607	0.934714	0.978994	0.264573	0.784093	0.933191	0.0261529	0.64179	0.982944	0.367868	0.948055	0.343519	0.945224
Heart - erythrocyte	0.839856	-4.93124e-09	4.96167e-09	FALSE	0.552124	0.931832	0.660574	0.303216	0.0585427	0.933094	0.922526	0.264338	0.961861	0.178622	0.950171	0.951331	0.952487	0.187597	0.317974	0.997857	0.78327	0.232529	0.716403	0.88395	0.946872	0.695865	0.145339	0.553824	0.83701	0.210909	0.384176	0.775568	0.687765	0.986944	0.69639	0.957521	0.639098	0.974152	0.51192	0.999585	0.999319	0.840193
Skin - stem cell of epidermis	0.848913	-5.10141e-09	4.94427e-09	FALSE	0.251323	0.678309	0.0463607	0.230945	0.473564	0.33741	0.495296	0.931342	0.723045	0.979391	0.844338	0.354755	0.304244	0.956725	0.460719	0.762822	0.374787	0.192653	0.649074	0.112938	0.580823	0.0933307	0.596197	0.791094	0.889512	0.992037	0.273007	0.445511	0.884883	0.919025	0.917667	0.863317	0.340372	0.362492	0.223146	0.934406	0.794078	0.924619
Limb Muscle - lymphocyte	0.85995	-8.3107e-09	7.69441e-09	FALSE	0.403948	0.963655	0.450747	0.908329	0.169946	0.957339	0.768147	0.00207421	0.000440933	0.11152	0.713863	0.0447739	0.610828	0.5766	0.531704	0.990342	0.000450178	0.922533	0.0223349	0.418959	0.756227	0.701283	8.70327e-06	0.490242	3.41986e-06	0.466143	0.000164447	1.34424e-07	0.181282	0.358722	0.671506	0.922816	0.00768935	0.958114	0.00698248	0.826328	0.568876	0.920525
Liver - endothelial cell of hepatic sinusoid	0.862187	-5.57086e-09	5.10995e-09	FALSE	0.108774	0.00819285	0.965304	0.773059	0.473878	0.0196391	0.0799669	0.908507	0.569656	0.573885	0.0103171	0.688035	0.720059	0.605198	0.39605	0.252135	0.647283	0.67092	0.519383	0.348178	0.169984	0.0197763	0.823692	0.793171	0.302416	0.342724	0.645061	0.94861	0.161545	0.421746	0.303206	0.0251382	0.476242	0.336406	0.595028	0.653278	0.12894	0.382674
Pancreas - endothelial cell	0.862372	-6.29456e-09	5.76934e-09	FALSE	0.216032	0.183922	0.796123	0.828512	0.525658	0.202711	0.00656702	0.630758	0.743491	0.42032	0.000269701	0.849492	0.958489	0.625396	0.237672	0.241279	0.67767	0.412249	0.814412	0.315607	0.404522	0.354058	0.782659	0.723909	0.918852	0.764459	0.968166	0.900382	0.555915	0.255058	0.720674	0.00418003	0.429987	0.60668	0.560941	0.517771	0.108353	0.869556
Limb Muscle - T cell	0.864111	-6.4065e-09	5.82951e-09	FALSE	0.921825	0.355583	0.435201	0.251865	0.0263864	0.959045	0.713817	0.000462424	0.00240563	0.189853	0.947428	0.0889973	0.521818	0.61922	0.425991	0.816305	0.00410183	0.520275	0.0324116	0.95513	0.984429	0.974949	0.00170272	0.163559	2.18661e-06	0.349151	0.00802912	0.00335258	0.808514	0.25727	0.680555	0.999911	0.00588072	0.899511	0.0106836	0.992432	0.953087	0.462587
Heart - leukocyte	0.864434	-6.10948e-09	5.55176e-09	FALSE	0.0283792	0.241506	0.183629	0.0819214	0.387845	0.804491	0.166739	0.00821682	0.00308628	0.650026	0.220509	0.871412	0.878847	0.987556	0.732871	0.999839	0.0133088	0.563627	0.734411	0.0379858	0.0412136	0.420878	0.00115306	0.637025	0.00268202	0.63797	0.0439307	0.149247	0.957584	0.429007	0.849822	0.180072	0.0538777	0.998896	0.0243442	0.724478	0.288611	0.722825
Marrow - regulatory T cell	0.876425	-7.76354e-09	6.70833e-09	FALSE	0.866562	0.382869	0.208632	0.742107	0.201602	0.999137	0.805914	0.00202036	0.00496382	0.667944	0.919958	0.523377	0.544265	0.894937	0.14096	0.950066	0.000197447	0.814981	0.265791	0.514048	0.885581	0.866655	0.000602277	0.834164	7.92369e-06	0.749783	0.00234048	0.00108124	0.165348	0.980797	0.712872	0.981467	0.00348713	0.722473	0.00338223	0.841662	0.680859	0.750369
Lung - myeloid cell	0.879116	-7.3087e-09	6.24367e-09	FALSE	0.246572	0.899566	0.27951	0.839995	0.147352	0.454143	0.731087	0.00743724	0.00350397	0.641648	0.909581	0.246573	0.761723	0.622347	0.2468	0.95386	0.00120225	0.67433	0.179868	0.28149	0.745973	0.45939	0.00677296	0.100007	0.000522867	0.383963	0.00936541	0.0222231	0.870912	0.543455	0.366661	0.78544	0.0653212	0.928964	0.0086402	0.74587	0.399679	0.839931
Marrow - precursor B cell	0.881855	-5.22552e-09	4.41229e-09	FALSE	0.0104594	0.96382	0.79225	0.960155	0.0096243	0.0990297	0.030095	0.0920194	0.09276	0.536396	0.0615625	0.0645788	0.868986	0.880295	0.563008	0.906925	0.0801518	0.514465	0.136576	0.168193	0.37192	0.343531	0.0309638	0.470941	1.83479e-05	0.398723	0.0136218	0.000143194	0.190276	0.169505	0.0485355	0.0499253	0.0490002	0.056703	0.226919	0.858141	0.437564	0.907664
Thymus - DN1 thymic pro-T cell	0.891295	-8.12698e-09	6.58886e-09	FALSE	0.72286	0.725408	0.119449	0.721767	0.170509	0.958883	0.999586	0.0136324	0.0508362	0.636168	0.997121	0.771459	0.945779	0.66748	0.0870004	0.829583	0.00538769	0.826348	0.836056	0.68562	0.390215	0.985978	0.00041303	0.924809	8.79442e-05	0.890743	0.00239694	0.000887521	0.999081	0.905506	0.503879	1	7.5621e-06	0.877747	0.0128228	0.978155	0.911866	0.981726
Fat - myeloid cell	0.908078	-7.29607e-09	5.48983e-09	FALSE	0.0489831	0.820528	0.444688	0.0584005	0.440955	0.428555	0.422019	0.0603963	0.00214428	0.48664	0.99078	0.683882	0.990579	0.432098	0.54809	0.997829	0.00113327	0.381313	0.657806	0.0385637	0.011188	0.0489074	0.00656203	0.617185	0.000520794	0.673442	0.024872	0.025038	0.99078	0.838295	0.388832	0.968689	0.23046	0.985632	0.00701128	0.875959	0.642043	0.990706
Limb Muscle - endothelial cell	0.909267	-7.33072e-09	5.48602e-09	FALSE	0.167165	0.455001	0.784063	0.985363	0.793957	0.245162	0.0237486	0.286063	0.512842	0.495561	0.00036104	0.866711	0.999823	0.869541	0.616219	0.358721	0.143634	0.340642	0.769438	0.280548	0.529966	0.276263	0.545456	0.729913	0.260959	0.934791	0.69919	0.781288	0.489192	0.49548	0.753985	0.00293252	0.38699	0.787144	0.120743	0.579998	0.103702	0.687158
Lung - lung endothelial cell	0.910499	-6.00456e-09	4.46823e-09	FALSE	0.131655	0.121724	0.626636	0.97915	0.681205	0.0681247	0.00228704	0.459142	0.699123	0.425783	0.000499291	0.926836	0.684581	0.908221	0.401323	0.227367	0.752975	0.37393	0.947866	0.11371	0.813278	0.213633	0.60015	0.684284	0.809	0.669446	0.981998	0.661528	0.810475	0.521334	0.559431	0.0057194	0.987424	0.346046	0.858147	0.401124	0.0686137	0.851547
Kidney - epithelial cell of proximal tubule	0.913599	-7.3323e-09	5.37852e-09	FALSE	0.57466	0.484246	0.963307	0.167244	0.573833	0.080459	0.261562	0.942927	0.90241	0.787607	0.385324	0.954098	0.192447	0.293307	0.0589835	0.857433	0.926735	0.454368	0.983697	0.0584222	0.0464857	0.184379	0.356828	0.859314	0.396921	0.994481	0.0758675	0.96162	0.936365	0.90578	0.961761	0.429897	0.58106	0.596743	0.416526	0.687143	0.351129	0.997389
Skin - leukocyte	0.915946	-1.02882e-08	7.46436e-09	FALSE	0.208177	0.628095	0.113689	0.39651	0.93311	0.865527	0.665769	0.783611	0.153108	0.704288	0.999684	0.990759	0.855534	0.372819	0.268805	0.719452	0.0605096	0.791224	0.898556	0.85778	0.346596	0.274888	0.303669	0.547889	0.847628	0.856411	0.259111	0.72305	0.782413	0.945822	0.710176	0.999697	0.102774	0.735308	0.142962	0.175206	0.326045	0.789439
Heart - cardiac muscle cell	0.922636	-6.07201e-09	4.26696e-09	FALSE	0.736084	0.862758	0.0642535	0.257154	0.0891021	0.24249	0.205654	0.882001	0.91948	0.71084	0.0270215	0.344777	0.291814	0.175065	0.212173	0.998772	0.642904	0.142511	0.192195	0.317443	0.59344	0.109108	0.256581	0.323042	0.420788	0.47122	0.636288	0.516528	0.365484	0.202214	0.388587	0.0828814	0.442865	0.220844	0.307739	0.662401	0.881067	0.844424
Mammary Gland - endothelial cell	0.927375	-9.73384e-09	6.68297e-09	FALSE	0.16527	0.156644	0.446265	0.844485	0.705857	0.326249	0.0383141	0.53364	0.129439	0.78134	0.00237773	0.76002	0.985358	0.86666	0.815756	0.290422	0.0885771	0.635348	0.789712	0.214979	0.196289	0.654553	0.672016	0.549505	0.282038	0.993797	0.607706	0.604259	0.277127	0.4456	0.712399	0.0198489	0.100001	0.372807	0.203946	0.410518	0.0736623	0.923435
Tongue - basal cell of epidermis	0.952814	-6.54169e-09	3.91068e-09	FALSE	0.33942	0.663627	0.171662	0.252425	0.512231	0.169677	0.691629	0.71494	0.464697	0.490952	0.872866	0.450402	0.890647	0.480089	0.386792	0.140533	0.311627	0.0468173	0.86471	0.177009	0.68751	0.402171	0.175422	0.77919	0.456106	0.858698	0.112113	0.306623	0.528971	0.983431	0.77969	0.828407	0.23819	0.291344	0.330774	0.969054	0.777318	0.855349
Lung - ciliated columnar cell of tracheobronchial tree	0.969583	-8.3737e-09	4.4667e-09	FALSE	0.78933	0.309591	0.581121	0.807276	0.284356	0.268902	0.633642	0.201991	0.975679	0.974755	0.974222	0.800623	0.695813	0.745614	0.986092	0.999992	0.925724	0.576326	0.781598	0.624618	0.756755	0.652975	0.302632	0.963785	0.889446	0.992307	0.968684	0.211381	0.32478	0.831525	0.931572	0.954095	0.328526	0.825198	0.854699	0.964033	0.882796	0.971754
Large Intestine - enterocyte of epithelium of large intestine	0.974822	-8.11159e-09	4.14507e-09	FALSE	0.147097	0.202644	0.886675	0.574975	0.595955	0.434982	0.444609	0.914159	0.926094	0.875789	0.600643	0.999886	0.372283	0.660038	0.0384835	0.998458	0.538098	0.928519	0.935897	0.454381	0.0247058	0.710019	0.500631	0.978876	0.939626	0.999318	0.28476	0.876959	0.990189	0.995916	0.775592	0.881149	0.730441	0.190697	0.0675095	0.999619	0.999988	0.997258
Skin - epidermal cell	0.977678	-8.54488e-09	4.25542e-09	FALSE	0.246227	0.545379	0.189748	0.25369	0.65533	0.0862396	0.85327	0.463844	0.0614872	0.875858	0.99469	0.892262	0.862038	0.879435	0.365201	0.999857	0.0381236	0.350346	0.912104	0.0327036	0.496383	0.512116	0.199176	0.768461	0.792991	0.989741	0.134531	0.341866	0.942842	0.996305	0.299497	0.999305	0.0838588	0.553487	0.351387	0.788068	0.744099	0.988964
Liver - hepatocyte	0.979411	-1.06204e-08	5.20163e-09	FALSE	0.109189	0.931299	0.544221	0.296546	0.835014	0.461079	0.350237	0.999833	0.951787	0.646312	0.693083	0.998896	0.0188328	0.19101	0.0597314	0.998902	0.915227	0.615572	0.75361	0.0151603	0.000374725	0.0096895	0.930583	0.942646	0.972627	0.97226	0.550584	0.80182	0.973833	0.976485	0.973367	0.900356	0.941821	0.0792691	0.605664	0.96314	0.827216	0.975473
Heart - fibroblast	0.981572	-8.69729e-09	4.16666e-09	FALSE	0.742907	0.973132	0.925627	0.770491	0.975897	0.251382	0.622081	0.163639	0.650106	0.955422	0.0666375	0.993704	0.677051	0.710824	0.945838	0.000846386	0.364644	0.457607	0.997445	0.360118	0.426262	0.0608034	0.882546	0.900448	0.573302	0.999732	0.711786	0.819792	0.838437	0.982763	0.129025	0.0976508	0.751649	0.980545	0.382108	0.144377	0.0457976	0.998268
Heart - professional antigen presenting cell	0.983426	-9.22141e-09	4.3287e-09	FALSE	0.00485934	0.72025	0.648609	0.489103	0.758117	0.887762	0.942018	0.0542075	0.454823	0.0853743	0.996773	0.582141	0.99425	0.184664	0.827001	0.999036	0.0125834	0.685424	0.1439	0.317975	0.966578	0.674931	0.0456499	0.0548406	0.00109228	0.158879	0.0582993	0.117857	0.695203	0.83702	0.231307	0.985975	0.0419567	0.999147	0.00158453	0.995442	0.974416	0.781113
Large Intestine - Brush cell of epithelium proper of large intestine	0.984473	-1.09688e-08	5.08668e-09	FALSE	0.602901	0.552203	0.329516	0.981335	0.932686	0.692361	0.855724	0.844406	0.622546	0.279696	0.973713	0.831093	0.833156	0.834153	0.474517	0.999549	0.348925	0.108985	0.717114	0.929637	0.949913	0.963842	0.506624	0.693145	0.844826	0.975955	0.441058	0.891819	0.993409	0.678661	0.689767	0.79927	0.882928	0.869301	0.222485	0.994918	0.991731	0.98105
Large Intestine - epithelial cell of large intestine	0.986047	-9.11302e-09	4.14492e-09	FALSE	0.137317	0.704585	0.760184	0.784489	0.413323	0.0251751	0.182376	0.994041	0.926436	0.99183	0.580052	0.976622	0.0455181	0.43036	0.0203026	0.831255	0.652685	0.964887	0.965457	0.29491	0.0771234	0.562561	0.348552	0.994032	0.898676	0.999999	0.189039	0.626343	0.98853	0.995403	0.942135	0.471623	0.208802	0.0244387	0.176756	0.970839	0.738372	0.999998
Fat - endothelial cell	0.990133	-1.06176e-08	4.55422e-09	FALSE	0.207475	0.294722	0.462158	0.901399	0.674035	0.391722	0.00128403	0.675798	0.834852	0.842555	2.57e-05	0.949897	0.887787	0.929662	0.575883	0.403837	0.733058	0.237507	0.941335	0.125144	0.354946	0.151376	0.929313	0.787931	0.973223	0.949533	0.899469	0.965184	0.503636	0.901193	0.862814	0.0026953	0.530536	0.72901	0.421389	0.726519	0.179041	0.841137
Skin - basal cell of epidermis	0.991256	-9.18445e-09	3.86506e-09	FALSE	0.205057	0.325839	0.0116351	0.308302	0.436918	0.00530586	0.10857	0.705396	0.0861453	0.992447	0.584933	0.348708	0.900765	0.910909	0.311709	0.939706	0.0208793	0.461486	0.463699	0.396568	0.557024	0.660665	0.0538567	0.836866	0.801116	0.995344	0.626462	0.519135	0.861745	0.988791	0.541801	0.325147	0.0586838	0.669688	0.204476	0.78344	0.783138	0.952803
Limb Muscle - macrophage	0.992545	-1.65061e-08	6.77995e-09	FALSE	0.0911847	0.891468	0.416618	0.840223	0.812052	0.433662	0.400568	0.107799	0.0531973	0.453539	0.929286	0.617266	0.867187	0.780231	0.70699	0.997895	0.00511971	0.75007	0.574862	0.0242718	0.125837	0.281768	0.344443	0.706228	0.0496372	0.723932	0.153834	0.350172	1	0.846994	0.812819	0.749544	0.042387	0.999992	0.00648026	0.62906	0.416325	0.990151
Heart - endocardial cell	0.996935	-1.15127e-08	4.20052e-09	FALSE	0.201952	0.116862	0.656623	0.979269	0.514345	0.367441	0.191348	0.976852	0.915754	0.997956	0.0409511	0.705891	0.643119	0.60317	0.559816	0.00798212	0.910636	0.550941	0.991477	0.402477	0.172038	0.334639	0.681151	0.74886	0.575602	0.977665	0.632674	0.909268	0.403259	0.30557	0.909842	0.100891	0.806471	0.918721	0.853886	0.974918	0.308232	0.747694
Limb Muscle - mesenchymal stem cell	0.997578	-1.08059e-08	3.83563e-09	FALSE	0.392888	0.996382	0.919339	0.428054	0.997276	0.472687	0.51507	0.07981	0.143947	0.966126	0.339967	0.927229	0.777707	0.369291	0.983265	1.37465e-05	0.00772525	0.483291	0.968046	0.182145	0.232571	0.0372016	0.568578	0.904663	0.0811309	0.91932	0.901555	0.438072	0.99365	0.98849	0.373601	0.0955123	0.0811487	0.831499	0.0159344	0.0124773	8.85229e-05	0.925261
Mammary Gland - stromal cell	0.998296	-1.19517e-08	4.08149e-09	FALSE	0.561125	0.977397	0.706533	0.0336866	0.999762	0.875921	0.726619	0.0967446	0.262067	0.93401	0.340295	0.830917	0.79758	0.835987	0.986795	0.000305866	0.0129936	0.605752	0.971946	0.333592	0.300112	0.241628	0.292816	0.990944	0.316146	0.917891	0.517919	0.334787	0.995628	0.882087	0.429009	0.118217	0.572662	0.984492	0.0192006	0.126829	0.0029562	0.931019
Bladder - bladder urothelial cell	0.998971	-1.22423e-08	3.97237e-09	FALSE	0.239428	0.723163	0.434381	0.976255	0.437106	0.355121	0.729771	0.586376	0.465874	0.655778	0.721219	0.997777	0.688615	0.855279	0.107843	0.98534	0.308396	0.404245	0.99668	0.0370517	0.0335877	0.24824	0.193892	0.944482	0.790094	0.98991	0.269733	0.298825	0.984683	0.950756	0.874623	0.808074	0.649789	0.0510278	0.213493	0.988727	0.989485	0.996232
Heart - endothelial cell	0.999246	-1.45703e-08	4.59168e-09	FALSE	0.157357	0.361074	0.796101	0.915346	0.735229	0.260259	0.011299	0.402223	0.920141	0.587171	0.00100622	0.972953	0.882248	0.68797	0.189793	0.512098	0.715038	0.35305	0.896115	0.220946	0.665254	0.1222	0.633805	0.309808	0.992999	0.849277	0.952492	0.919558	0.234074	0.810333	0.795324	0.0206171	0.812639	0.936493	0.348048	0.838128	0.324516	0.728182

## Sheet: 5 - S-LDSC MNS
Annotation	P-value	Estimate	Std.error	FWER < 0.05	Annotation size	h2g proportion	h2g enrichment	h2g enrichment P-value	AD (Jansen, 2019)	ADHD (Demontis, 2017)	AN (Duncan, 2017)	ASD (Grove, 2018)	BIP (PGC, 2018)	CAD (Schunkert, 2011)	CVD (Loh, 2018)	CELIAC (Dubois, 2010)	CROHNS (Jostins, 2012)	DEP (Nagel, 2018)	BP_DIA (Loh, 2018)	EA3 (Lee, 2018)	FG_F (Lagou, 2018)	FI_F (Lagou, 2018)	HBA1C (Wheeler, 2017)	HEIGHT (Loh, 2018)	IBD (Jostins, 2012)	INS (Jansen, 2018)	INT (Savage, 2018)	HDL (Teslovich, 2010)	LDL (Teslovich, 2010)	TG (Teslovich, 2010)	SLE (Bentham, 2015)	MDD (Howard, 2019)	MS (Patsopoulos, 2011)	NEU (Nagel, 2018)	PBC (Cordell, 2015)	RA (Okada, 2014)	RT (Linner, 2019)	SCZ (Pardinas, 2018)	SWB (Okbay, 2016)	BP_SYS (Loh, 2018)	T1D (Bradfield, 2011)	T2D (Loh, 2018)	UC (Jostins, 2012)	WHR (Pulit, 2019)	WHRadjBMI (Loh, 2018)	WORRY (Nagel, 2018)
MEGLU3	3.84801e-05	2.73122e-08	6.90804e-09	TRUE	0.0993702	0.137043	1.37911	3.81952e-12	0.889477	0.00791056	0.27685	0.00497027	4.06742e-05	0.15583	0.476419	0.376746	0.108951	0.00507092	0.458077	0.000376061	0.202127	0.861932	0.189364	0.749017	0.215192	0.000114568	2.06008e-06	0.290635	0.362647	0.091592	0.0735642	0.000199166	0.000302	9.65434e-06	0.24265	0.0613544	0.042804	0.0508872	0.0571231	0.627699	0.541993	0.0865704	0.150103	0.337395	0.998626	1.58476e-06
MEGLU1	1.54074e-05	2.23821e-08	5.3708e-09	TRUE	0.16126	0.214269	1.32872	3.17428e-15	0.376066	0.106029	0.392302	0.0290795	5.81353e-05	0.458316	0.0560789	0.385256	0.272351	0.014148	0.363224	0.000173355	0.663401	0.989073	0.202945	0.963118	0.274296	0.00202248	1.93247e-06	0.454033	0.137841	0.28865	0.166268	0.000243072	0.000369459	0.000730695	0.00656591	0.0882117	0.00262154	0.157832	0.0956686	0.403119	0.0223218	0.0966406	0.1102	0.269664	0.987042	2.93698e-05
MEINH3	0.000101488	2.21721e-08	5.96782e-09	TRUE	0.149849	0.199774	1.33316	5.55248e-13	0.126936	0.215143	0.470055	0.430243	2.11763e-05	0.302702	0.190484	0.278563	0.493541	0.0351505	0.370969	0.00542098	0.128091	0.872616	0.0311152	0.927055	0.561548	0.0025883	7.90682e-05	0.386831	0.271071	0.0731073	0.196578	0.0125316	0.000628872	0.018832	0.00144811	0.0983213	0.00316527	0.0871755	0.233571	0.489649	0.229315	0.0867461	0.445929	0.533794	0.995616	0.000645797
DEGLU5	9.14384e-06	3.29372e-08	7.68693e-09	TRUE	0.140685	0.19586	1.39219	9.15547e-13	0.140622	0.0724943	0.34732	0.0163055	0.000139896	0.773165	0.0485598	0.035003	0.171305	0.000250274	0.531145	0.000543742	0.492678	0.743775	0.0515297	0.999707	0.145105	0.00233018	0.000212668	0.34102	0.456901	0.145968	0.142053	0.00194302	0.00269824	9.11475e-05	0.00618764	0.0149522	0.00303788	0.0119132	0.132826	0.428825	0.00814076	0.0341238	0.0395143	0.12891	0.970181	1.07988e-07
MEINH2	8.11498e-06	2.43583e-08	5.64989e-09	TRUE	0.170645	0.229235	1.34335	1.93121e-15	0.231765	0.0707639	0.539391	0.180574	2.42912e-06	0.500416	0.178256	0.85487	0.771644	0.104082	0.531277	0.00483007	0.314637	0.959963	0.00889209	0.915706	0.728057	0.00487466	0.000343852	0.696668	0.0378659	0.247198	0.221268	0.0134658	0.00317162	0.01737	0.00903183	0.129938	0.00169525	0.00264262	0.125682	0.821317	0.0239249	0.289018	0.600352	0.183685	0.981349	6.56563e-05
TEINH1	0.000114149	1.98583e-08	5.3883e-09	TRUE	0.151212	0.195442	1.29251	1.70499e-13	0.634054	0.304684	0.122113	0.0513988	6.38813e-06	0.0710288	0.17727	0.0792758	0.432302	0.00123713	0.578763	1.17488e-05	0.346707	0.875526	0.0590271	0.946667	0.357837	0.0194814	1.25676e-06	0.925793	0.837845	0.552858	0.318695	0.0509748	0.0041518	0.00499557	0.0664506	0.0433147	0.0662691	0.00289624	0.0870243	0.411364	0.139466	0.462217	0.169201	0.605873	0.995924	7.7266e-05
DEINH3	1.17705e-06	2.35316e-08	4.98511e-09	TRUE	0.157647	0.212113	1.34549	2.34299e-16	0.313112	0.0344771	0.397829	0.126747	1.43409e-06	0.0956983	0.0911402	0.760666	0.597128	0.0227059	0.190215	0.0115828	0.4083	0.694893	0.0405997	0.903161	0.18451	0.0460417	0.0015051	0.33028	0.515605	0.289707	0.613589	0.0693091	0.00534795	0.0126048	0.00310183	0.0420689	0.00100905	0.00214549	0.0800883	0.330865	0.133319	0.00501818	0.0212385	0.479353	0.997559	0.000438017
MEGLU2	7.44746e-05	2.80336e-08	7.39125e-09	TRUE	0.148475	0.202782	1.36576	3.70002e-12	0.346281	0.043074	0.33274	0.0751682	0.000648361	0.105054	0.114582	0.28797	0.200174	6.30243e-05	0.604639	0.000541708	0.425431	0.573756	0.0585069	0.670687	0.152739	0.000815354	1.65537e-05	0.0468705	0.141127	0.039474	0.0980178	6.1923e-05	0.0119894	9.65217e-06	0.0843305	0.0364606	0.000994709	0.0649684	0.0778857	0.256958	0.0468231	0.0907171	0.190651	0.0883211	0.89182	5.16817e-06
MEGLU11	2.59169e-06	2.45193e-08	5.3803e-09	TRUE	0.15267	0.206054	1.34967	5.69467e-15	0.169533	0.194411	0.383306	0.0168762	0.000554583	0.0974627	0.274661	0.0391155	0.0999928	0.000159118	0.468287	2.16232e-05	0.0509612	0.942814	0.0305622	0.922639	0.187335	4.73597e-05	6.22661e-07	0.216761	0.0731758	0.035105	0.0908735	2.64807e-05	0.0236801	0.000594153	0.0902288	0.0540652	0.0119204	0.0732801	0.0445488	0.359589	0.0434543	0.0493935	0.260275	0.00172347	0.426198	6.70637e-05
TEGLU21	0.000115727	2.34046e-08	6.35656e-09	TRUE	0.153965	0.206435	1.34079	3.73802e-13	0.547677	0.0152984	0.281425	0.0368383	3.74936e-07	0.546797	0.0518421	0.324726	0.273719	8.27306e-05	0.358333	2.93016e-12	0.0966997	0.506043	0.191273	0.989203	0.286135	0.00181998	3.6367e-11	0.110109	0.129062	0.274375	0.851987	6.4345e-05	0.0308704	1.18134e-08	0.124449	0.25001	9.68417e-05	5.24082e-09	0.348831	0.271623	0.0526554	0.0623032	0.485761	0.0730324	0.965674	1.09194e-10
TEGLU17	8.56403e-05	1.75731e-08	4.67619e-09	TRUE	0.219563	0.280025	1.27537	2.44149e-13	0.498088	0.0317083	0.322419	0.171279	3.31248e-09	0.0870279	0.0138649	0.379627	0.461213	0.0355241	0.356439	1.71053e-10	0.0490583	0.722269	0.262811	0.983596	0.518782	4.31372e-05	1.55697e-10	0.0334266	0.117637	0.167304	0.679497	0.000136678	0.0322905	2.09753e-05	0.118104	0.108859	0.000503243	2.24915e-07	0.318494	0.487822	0.295768	0.0995162	0.640537	0.413586	0.983235	4.77116e-09
HBGLU5	0.000110504	2.12443e-08	5.75148e-09	TRUE	0.146456	0.202211	1.38069	9.45657e-13	0.452243	0.05907	0.883178	0.267889	0.0112161	0.289139	0.228745	0.640659	0.923962	0.0702788	0.602435	0.00114629	0.921686	0.885647	0.134038	0.990997	0.696122	0.00888991	0.00140456	0.438378	0.632745	0.245372	0.189529	0.186017	0.0373594	7.65904e-05	0.0271112	0.161596	0.00375776	3.02308e-05	0.10805	0.679335	0.00382446	0.842065	0.320218	0.454463	0.987932	9.6623e-05
TEGLU4	0.000114284	1.98192e-08	5.37813e-09	TRUE	0.217074	0.28489	1.31241	1.74377e-14	0.140069	0.0870173	0.587862	0.279876	4.17029e-07	0.29911	0.150286	0.967153	0.374107	0.00417191	0.513963	3.71331e-09	0.116958	0.834199	0.238153	0.996453	0.0970442	0.000407133	4.09153e-12	0.0260409	0.0520847	0.0791168	0.518124	0.00124951	0.0435525	1.5207e-07	0.135249	0.875223	6.85152e-05	3.88759e-10	0.246883	0.455083	0.0368177	0.107807	0.168982	0.395597	0.993778	9.48499e-13
HBINH8	0.000159137	2.31798e-08	6.43893e-09	TRUE	0.0751348	0.106303	1.41483	3.86549e-12	0.197965	0.0522133	0.364384	0.625335	0.0832954	0.254603	0.303593	0.0897568	0.794682	0.820488	0.479491	0.00760043	0.156165	0.342163	0.0245706	0.550138	0.385653	0.0610382	0.00166294	0.514649	0.0760734	0.0998795	0.722139	0.0471006	0.0855414	0.332706	0.124475	0.608619	0.0766813	0.000940079	0.613921	0.447624	0.00721544	0.0129946	0.632257	0.0168637	0.601168	0.0434664
TEINH12	0.000111583	1.80119e-08	4.87965e-09	TRUE	0.170779	0.224011	1.3117	3.04751e-13	0.0936671	0.117796	0.179332	0.387853	2.6977e-06	0.532741	0.415636	0.828736	0.690999	0.00138125	0.709943	0.0016992	0.313301	0.590351	0.205242	0.989734	0.788782	0.00706363	4.47792e-07	0.6503	0.427536	0.405001	0.235874	0.00530632	0.0905122	0.000573999	0.11314	0.328388	0.0398776	0.00019148	0.127081	0.77079	0.0541026	0.763075	0.483557	0.329905	0.99742	5.27916e-08
MEGLU10	8.83146e-06	2.21378e-08	5.15726e-09	TRUE	0.14743	0.194858	1.32169	8.66513e-15	0.161044	0.0232176	0.0998013	0.0220515	0.000311318	0.118299	0.396438	0.138543	0.943115	0.00755233	0.469084	6.72035e-05	0.281434	0.93798	0.0616923	0.989245	0.697228	0.00103998	4.68997e-05	0.159994	0.480588	0.049238	0.148897	0.000155184	0.115285	5.52942e-05	0.278329	0.183573	0.0541253	0.242824	0.0570355	0.464582	0.762027	0.114962	0.646995	0.183195	0.993129	2.37013e-05
HBGLU2	5.36193e-05	2.40338e-08	6.2045e-09	TRUE	0.17448	0.229723	1.31662	2.98499e-13	0.0239124	0.286547	0.355058	0.531726	1.00127e-05	0.337298	0.119051	0.105709	0.256446	0.00258646	0.36324	0.0060141	0.0825839	0.714948	0.0675353	0.988075	0.394152	0.0112139	4.69092e-05	0.370915	0.263864	0.172369	0.185577	0.00497968	0.155574	0.0414826	0.0480131	0.160518	0.0200465	0.00801604	0.275383	0.176326	0.299867	0.00898774	0.401994	0.0642155	0.927568	0.00057253
MEGLU7	9.13157e-05	1.99294e-08	5.32601e-09	TRUE	0.115158	0.158638	1.37757	6.36555e-13	0.448208	0.117514	0.272492	0.0926104	2.73139e-06	0.492607	0.530658	0.64445	0.259937	0.00915701	0.695324	4.21717e-07	0.496507	0.926103	0.502559	0.817542	0.519372	8.60512e-06	1.12449e-07	0.571638	0.178069	0.309035	0.0729464	4.20769e-06	0.227445	0.000179407	0.0152387	0.0250886	0.00736278	0.000445337	0.111961	0.789469	0.176539	0.0634076	0.585235	0.0683114	0.969132	4.49661e-05
DEGLU4	4.18573e-05	1.82511e-08	4.63991e-09	TRUE	0.119064	0.158467	1.33094	1.78497e-13	0.186599	0.0293936	0.452515	0.0549031	0.000543457	0.53479	0.302233	0.373087	0.247725	0.000323651	0.767801	9.76269e-07	0.163351	0.8457	0.0524297	0.998066	0.313138	0.0024972	2.88506e-05	0.836673	0.837907	0.754736	0.24625	3.29534e-06	0.288129	1.78251e-06	0.103737	0.283753	0.00167276	3.79971e-05	0.0106618	0.574131	0.0346997	0.0701026	0.245761	0.269984	0.932746	4.08354e-07
TEGLU19	4.5006e-05	1.87736e-08	4.79402e-09	TRUE	0.126533	0.169972	1.3433	1.35241e-15	0.406821	0.116216	0.602743	0.0166032	3.33553e-08	0.0923774	0.0361176	0.519188	0.500621	0.0368131	0.281784	2.61201e-09	0.287511	0.939741	0.171207	0.995119	0.336807	0.0108642	3.46081e-13	0.107143	0.845676	0.45341	0.659132	0.00241364	0.318565	1.3562e-05	0.40497	0.643187	0.000253015	1.71569e-09	0.208793	0.173361	0.617645	0.409689	0.328745	0.454963	0.966965	2.87519e-06
HBSER5	5.01534e-05	1.95728e-08	5.03177e-09	TRUE	0.150552	0.193695	1.28657	3.42907e-13	0.151468	0.190069	0.859105	0.116151	6.24603e-05	0.249043	0.12249	0.83999	0.519774	0.0272693	0.425784	0.0199907	0.229184	0.276588	0.335924	0.978726	0.402235	0.0314974	0.00490105	0.198356	0.128564	0.170796	0.0255897	0.000296736	0.363964	0.0262496	0.0169354	0.126979	0.0732749	0.0993907	0.365418	0.313574	0.320399	0.110742	0.277933	0.27316	0.941415	0.00242801
TEGLU23	4.05101e-05	1.54641e-08	3.92353e-09	TRUE	0.213504	0.275288	1.28938	2.93443e-16	0.8899	0.020457	0.701687	0.258095	1.0563e-07	0.305075	0.0600291	0.55738	0.598671	0.00356296	0.221871	6.93815e-07	0.0521865	0.829931	0.193728	0.802912	0.544039	0.0377389	7.87564e-09	0.132032	0.476389	0.192131	0.995706	0.00273084	0.404877	0.000971891	0.0214856	0.736326	0.00179998	2.32819e-05	0.644899	0.232166	0.192792	0.299543	0.520703	0.614219	0.99735	0.00036491
MGL2	0.946708	-8.58279e-09	5.31859e-09	FALSE	0.0950962	0.10458	1.09973	0.124927	0.0534668	0.388755	0.0476542	0.551979	0.87169	0.742469	0.0315813	0.0146408	9.59831e-07	0.935749	0.306314	0.992116	0.596064	0.94213	0.270462	0.97548	2.53972e-07	0.822998	0.871303	0.0888706	0.0183732	0.12673	0.000730429	0.958495	4.42773e-06	0.968976	0.00159532	0.00779915	0.998235	0.911279	0.814748	0.298313	0.00179161	0.70125	0.000290243	0.922924	0.453705	0.996174
MGL1	0.908354	-7.19195e-09	5.4047e-09	FALSE	0.0942381	0.104241	1.10614	0.110389	0.0437409	0.473378	0.0186037	0.435491	0.857135	0.705966	0.141576	0.0139895	5.65845e-05	0.990849	0.258714	0.995251	0.558481	0.792349	0.31014	0.959813	0.000158146	0.958291	0.95589	0.0219337	0.0260005	0.0081688	0.00073662	0.993696	8.81239e-05	0.984321	0.00319248	0.00564139	0.999076	0.968422	0.917628	0.378712	0.00493434	0.857146	0.00387025	0.939762	0.537079	0.994435
MGL3	0.985296	-1.11639e-08	5.12582e-09	FALSE	0.097201	0.104331	1.07336	0.243955	0.0376973	0.6198	0.0930456	0.346851	0.965027	0.789451	0.177362	0.0065397	1.67731e-06	0.991515	0.509402	0.998318	0.568734	0.896908	0.619089	0.964467	6.9511e-07	0.913157	0.927413	0.0437189	0.134157	0.0210509	0.00249068	0.988626	0.000184209	0.998916	0.00351539	0.00490486	0.999896	0.887773	0.893648	0.577917	0.00461124	0.650298	0.000560535	0.958357	0.508292	0.9995
PVM1	0.991277	-1.23291e-08	5.1865e-09	FALSE	0.100495	0.104604	1.04089	0.50848	0.0698535	0.743096	0.114136	0.0339669	0.781525	0.838978	0.315044	0.00882608	0.00415239	0.986908	0.489202	0.994742	0.462286	0.958668	0.16626	0.884673	0.00273409	0.935205	0.989854	0.0822342	0.0438965	0.0785694	0.000121673	0.99481	0.000829619	0.995899	0.0984744	0.0328542	0.999726	0.994538	0.747379	0.488167	0.00993196	0.969922	0.0053651	0.946281	0.341899	0.998495
MEINH6	0.01009	1.478e-08	6.36252e-09	FALSE	0.0863448	0.11794	1.36592	9.63107e-10	0.429689	0.545131	0.089453	0.112205	8.1149e-05	0.592558	0.296097	0.227618	0.845573	0.0173302	0.867861	0.0761503	0.386247	0.878732	0.12506	0.97954	0.288016	0.00769058	0.0308414	0.957849	0.907425	0.415601	0.206855	0.0664572	0.00183677	0.00188658	0.159653	0.0988323	0.0191124	0.0524508	0.112297	0.774367	0.00750191	0.290656	0.4748	0.087727	0.77353	0.000255856
PVM2	0.991238	-1.30831e-08	5.50747e-09	FALSE	0.0885097	0.0910973	1.02923	0.657699	0.0936806	0.533945	0.223568	0.077304	0.874304	0.788576	0.151517	0.0137509	0.000251162	0.996911	0.241557	0.991589	0.503835	0.980996	0.221634	0.882606	0.000390638	0.973529	0.977961	0.0492718	0.0504797	0.0594288	2.98357e-05	0.960532	0.00196376	0.994232	0.0502355	0.0144332	0.999677	0.985232	0.895616	0.202646	0.0105729	0.916105	0.00376262	0.929651	0.23404	0.994617
SZNBL	0.541062	-4.72305e-10	4.58062e-09	FALSE	0.100863	0.123141	1.22087	0.000135938	0.683675	0.0287155	0.569376	0.313919	0.0685914	0.643203	0.31832	0.879984	0.846761	0.800602	0.223237	0.180453	0.140413	0.336375	0.17294	0.0244113	0.90098	0.511277	0.431547	0.414578	0.0265623	0.227194	0.260142	0.399171	0.00225141	0.582875	0.145794	0.151462	0.760924	0.124474	0.851264	0.372307	0.0633893	0.172199	0.936858	0.494097	0.123123	0.662316
TEGLU12	0.006197	1.04754e-08	4.18895e-09	FALSE	0.156899	0.199079	1.26884	5.13692e-12	0.0993473	0.00262258	0.54443	0.00438259	5.36544e-07	0.628448	0.194106	0.496577	0.368513	0.0711091	0.905062	6.61746e-07	0.800578	0.971379	0.0925813	0.997307	0.0905382	0.000232717	2.29479e-06	0.231167	0.525002	0.685087	0.232272	0.00879595	0.00505652	0.000174453	0.145584	0.68162	0.00625158	3.1295e-07	0.249494	0.956883	0.0769836	0.599656	0.0528442	0.959173	0.999956	6.00889e-05
MEINH4	0.000771679	3.10537e-08	9.80725e-09	FALSE	0.113185	0.158117	1.39699	8.92024e-09	0.321544	0.361137	0.403592	0.0113369	2.06576e-05	0.211061	0.775217	0.199013	0.57059	6.38345e-05	0.985264	0.00109531	0.429991	0.701772	0.00815493	0.967435	0.513993	5.69493e-05	4.17211e-06	0.902264	0.522919	0.574756	0.185801	0.00223056	0.00578693	3.6819e-05	0.0950756	0.153511	0.0312204	0.0438005	0.33973	0.985539	0.362324	0.0364239	0.386743	0.0318789	0.76902	8.69112e-05
SCINH8	0.00156731	1.63464e-08	5.53324e-09	FALSE	0.0616558	0.0870024	1.4111	2.60481e-10	0.887564	0.346904	0.917879	0.065137	0.00212138	0.263153	0.562477	0.401357	0.80637	0.132452	0.193257	0.385648	0.152192	0.754029	0.168897	0.628301	0.890517	0.0544538	0.130961	0.365953	0.539687	0.509669	0.743426	0.152609	0.00599862	0.343183	0.135537	0.823234	0.0837168	0.00481098	0.0373376	0.0623616	0.0793199	0.0723804	0.991435	0.049496	0.104244	0.301235
SATG2	0.999172	-1.36791e-08	4.34833e-09	FALSE	0.117374	0.128302	1.09311	0.0638546	0.174679	0.935233	0.729982	0.911193	0.8301	0.613618	0.976552	0.483184	0.316138	0.999481	0.698442	1	0.971609	0.760088	0.638534	0.0528723	0.171463	0.65309	0.999998	0.0211736	0.14062	0.333415	0.684205	0.992188	0.00634899	0.976017	0.207183	0.872634	0.988586	0.999777	0.998584	0.959505	0.0856835	0.851464	0.183212	0.586541	0.0473254	0.994757
TEGLU14	0.117256	6.33679e-09	5.33034e-09	FALSE	0.126893	0.159174	1.2544	3.17134e-08	0.227033	0.208726	0.408911	0.0860968	1.93109e-05	0.166422	0.242053	0.747582	0.174843	0.0219023	0.850713	2.97023e-06	0.276464	0.625924	0.155301	0.994447	0.0286622	0.00424035	5.54889e-05	0.570924	0.462244	0.59957	0.564572	0.000984613	0.00681898	4.74742e-07	0.0918863	0.219254	0.00118409	7.53729e-05	0.28389	0.741869	0.00312258	0.0969206	0.058992	0.311157	0.629886	3.43643e-08
VLMC1	0.99972	-1.52795e-08	4.42875e-09	FALSE	0.0886092	0.0926686	1.04581	0.435229	0.331809	0.994106	0.174805	0.862341	0.996156	0.321632	0.839771	0.0643625	0.179273	0.998912	0.376669	0.999999	0.189285	0.137849	0.757708	3.80374e-05	0.0193531	0.80234	0.999987	0.084032	0.384312	0.0540483	0.254961	0.929636	0.00751946	0.994209	0.386731	0.377418	0.993498	0.999874	0.867056	0.499169	0.0216034	0.747974	0.0119003	0.042818	0.000367218	0.999593
DEGLU1	0.00427169	1.05147e-08	3.99829e-09	FALSE	0.229887	0.286634	1.24685	2.20028e-12	0.108023	0.00857822	0.681913	0.357816	9.43062e-05	0.408464	0.0810047	0.680389	0.100099	0.0273466	0.595925	0.00258003	0.229309	0.525459	0.0332479	0.998954	0.108307	3.62926e-05	0.00127332	0.237289	0.0474611	0.300874	0.0172626	0.00116504	0.00897121	0.000263166	0.0244751	0.145299	0.0036816	0.000286966	0.419631	0.486776	0.0957868	0.148541	0.199014	0.825184	0.994313	4.98935e-06
HBINH5	0.000233956	1.83554e-08	5.24666e-09	FALSE	0.215572	0.275119	1.27623	1.10602e-13	0.0999258	0.025233	0.479749	0.222245	0.000286478	0.144451	0.0699016	0.867677	0.152701	0.110509	0.167879	0.056112	0.0619359	0.80703	0.00287761	0.807956	0.177862	0.00514362	0.000575397	0.255963	0.501393	0.399624	0.607	0.00813935	0.00973545	0.104477	0.00260524	0.0697497	0.0218279	0.00894565	0.470445	0.161082	0.232072	0.149067	0.10579	0.10608	0.929976	0.00172823
PSNF2	0.122111	6.1517e-09	5.2827e-09	FALSE	0.114816	0.145415	1.26651	2.28731e-07	0.102363	0.740315	0.429861	0.196634	0.140593	0.330914	0.0393832	0.758749	0.348808	0.423742	0.224341	0.98753	0.934109	0.747215	0.0615764	0.630392	0.051753	0.44801	0.905215	0.102535	0.0540882	0.742717	0.793535	0.9243	0.0101455	0.781708	0.00658671	0.765022	0.412535	0.79695	0.282853	0.434392	0.239811	0.653183	0.0016874	0.826751	0.787915	0.922159
TEINH5	0.00990252	1.24917e-08	5.36119e-09	FALSE	0.106868	0.138233	1.29349	1.40165e-07	0.125388	0.133657	0.241058	0.0988186	0.000320395	0.344209	0.677114	0.292886	0.399923	0.00177301	0.74952	0.00108946	0.167929	0.358006	0.585243	0.678212	0.383675	0.0210546	0.00153694	0.53563	0.168284	0.330584	0.0709747	0.000648255	0.0115253	0.00104142	0.0596361	0.186656	0.545912	0.0034744	0.402673	0.724593	0.00510113	0.955584	0.838211	0.13392	0.93412	0.000872005
TEGLU6	0.000962097	1.3923e-08	4.48883e-09	FALSE	0.142637	0.187352	1.31348	1.2108e-11	0.637345	0.0449465	0.050073	0.00597609	2.13365e-07	0.218643	0.59145	0.812388	0.837237	0.0204091	0.767629	2.93077e-06	0.250817	0.774615	0.635987	0.999304	0.433849	0.00406819	8.6364e-08	0.499472	0.584678	0.156848	0.21663	0.0160427	0.0134002	5.10535e-05	0.0810583	0.701789	0.02296	3.67429e-06	0.0612218	0.724561	0.214584	0.165185	0.422123	0.323079	0.945101	3.8594e-07
SCHW	0.995781	-1.40193e-08	5.32234e-09	FALSE	0.0600033	0.064644	1.07734	0.274148	0.183731	0.970324	0.107441	0.962921	0.863338	0.284341	0.644302	0.456529	0.740484	0.992801	0.148223	0.945404	0.92154	0.539482	0.207481	0.83827	0.342632	0.422648	0.998868	0.0458982	0.105598	0.116076	0.564554	0.960187	0.0138663	0.975311	0.237292	0.909243	0.965155	0.998511	0.794277	0.562031	0.294163	0.871912	0.214824	0.747999	0.275714	0.888307
TEGLU9	0.00184987	1.39693e-08	4.81254e-09	FALSE	0.149516	0.191993	1.2841	3.1874e-12	0.308418	0.0141644	0.320082	0.0157617	9.0114e-07	0.125197	0.29555	0.93054	0.802009	0.000118326	0.872798	5.17296e-07	0.33254	0.921189	0.392389	0.999544	0.134972	0.00332343	2.90264e-10	0.846239	0.16767	0.420676	0.326481	0.00114756	0.0141286	6.76232e-07	0.0364788	0.19204	4.67385e-05	3.71461e-10	0.206361	0.790793	0.0217154	0.194672	0.119516	0.414349	0.985926	1.51966e-07
SYCHO2	0.420945	1.64368e-09	8.23998e-09	FALSE	0.117834	0.141428	1.20023	0.00154543	0.141322	0.297994	0.26954	0.0515037	0.189355	0.353464	0.315362	0.202138	0.827002	0.831375	0.751651	0.948255	0.137391	0.329845	0.680287	0.897235	0.527896	0.0873168	0.815285	0.0716898	0.472865	0.2913	0.600764	0.994935	0.0149141	0.998721	0.0534914	0.423012	0.923321	0.604804	0.605936	0.819456	0.792679	0.458611	0.238944	0.754807	0.814154	0.995195
OPC	0.633609	-1.29007e-09	3.77845e-09	FALSE	0.131114	0.153269	1.16897	0.000124189	0.221362	0.647268	0.799957	0.422988	0.330481	0.931869	0.137496	0.633159	0.859075	0.997208	0.301559	0.77745	0.408213	0.677331	0.232063	0.157989	0.771162	0.891486	0.966136	0.456815	0.10145	0.41606	0.998827	0.795803	0.0163222	0.912424	0.267853	0.333557	0.915894	0.205253	0.966226	0.476479	0.49162	0.333207	0.917087	0.0596978	0.00682677	0.912305
TEGLU5	0.00159413	1.31872e-08	4.47179e-09	FALSE	0.154567	0.199222	1.2889	5.53922e-12	0.658733	0.00849754	0.192377	0.0717462	7.68867e-05	0.846217	0.419213	0.666333	0.535823	0.0205276	0.945467	5.19116e-07	0.250981	0.768746	0.257687	0.998884	0.159911	0.000945997	3.52977e-09	0.65335	0.168632	0.624612	0.407336	0.00487149	0.0164164	0.000100321	0.0530453	0.72812	0.00338888	0.00013116	0.0198179	0.719953	0.244688	0.253218	0.140446	0.602637	0.998445	9.54146e-08
PSNP5	0.0578338	8.53831e-09	5.42728e-09	FALSE	0.146406	0.184339	1.25909	1.48688e-07	0.0511876	0.482271	0.804237	0.730925	0.472187	0.586246	0.25913	0.655893	0.419647	0.697985	0.925939	0.914343	0.872847	0.853464	0.0840518	0.612635	0.160822	0.512611	0.743605	0.0269159	0.410035	0.697079	0.118433	0.787326	0.016771	0.802995	0.126558	0.117555	0.510552	0.161726	0.539151	0.766202	0.490593	0.522942	0.166053	0.696739	0.927546	0.844541
SATG1	0.999924	-1.84284e-08	4.86357e-09	FALSE	0.0643127	0.0662115	1.02952	0.627426	0.397633	0.843288	0.778431	0.896924	0.667207	0.33245	0.70951	0.896271	0.657485	0.999999	0.314419	0.989332	0.477729	0.897911	0.0433266	0.033277	0.404585	0.824006	0.999559	0.145557	0.222545	0.45972	0.626174	0.986794	0.0184274	0.992583	0.0770623	0.982072	0.928935	0.933	0.989919	0.775032	0.0596857	0.881956	0.505867	0.898596	0.212438	0.968152
TEGLU16	0.0205541	9.96081e-09	4.87692e-09	FALSE	0.142361	0.177651	1.24789	5.58988e-09	0.806619	0.00696385	0.0172972	0.0623489	4.9266e-05	0.642579	0.177093	0.61529	0.740021	0.0206609	0.597787	8.93887e-10	0.395824	0.633964	0.356439	0.983859	0.516463	0.0029351	6.46493e-08	0.164736	0.267858	0.255329	0.242667	1.3041e-05	0.0214863	6.66568e-07	0.0835409	0.184795	0.000250977	2.55283e-05	0.0579546	0.286466	0.0198493	0.379858	0.331509	0.48087	0.971527	2.54558e-10
SCINH2	0.000964392	3.80914e-08	1.22836e-08	FALSE	0.071642	0.111752	1.55986	2.33389e-08	0.174081	0.101508	0.0315988	0.462268	0.0112169	0.0610671	0.022669	0.151123	0.412644	0.230382	0.116583	3.05197e-05	0.1824	0.665362	0.00461735	0.619733	0.156943	0.0385448	0.00122455	0.216167	0.045839	0.131638	0.55125	0.00490661	0.0235604	0.00280368	0.0821511	0.232547	0.0573479	0.00306385	0.116317	0.206357	0.100749	0.0162867	0.400861	0.0437342	0.733233	0.000421178
TEGLU13	0.00416106	1.2408e-08	4.70228e-09	FALSE	0.165274	0.209684	1.2687	1.36153e-10	0.646163	0.0382331	0.750172	0.100595	2.3673e-06	0.185683	0.346831	0.167595	0.839643	0.0360084	0.775014	5.15968e-06	0.155643	0.51945	0.194786	0.99793	0.176241	0.011088	6.63298e-06	0.336978	0.181305	0.149704	0.200335	0.00875981	0.0250487	1.31176e-07	0.0109514	0.426634	0.00348979	2.33788e-07	0.214921	0.59991	0.479271	0.0233733	0.0653491	0.290775	0.853042	3.14123e-07
DGNBL1	0.694701	-2.69811e-09	5.29851e-09	FALSE	0.0580509	0.0714355	1.23057	0.000604354	0.0763475	0.499091	0.99729	0.387033	0.0144362	0.649045	0.43753	0.288325	0.452526	0.477636	0.718432	0.115175	0.881258	0.84326	0.177483	0.417293	0.366035	0.468945	0.00139536	0.340955	0.107545	0.818342	0.490159	0.214405	0.0255114	0.3375	0.355867	0.276506	0.506989	0.151988	0.300757	0.755923	0.226346	0.830675	0.414666	0.215845	0.0702812	0.849898
DEINH2	0.0225753	1.49662e-08	7.47094e-09	FALSE	0.1131	0.151275	1.33753	7.3977e-08	0.737236	0.491451	0.216181	0.109758	1.6428e-05	0.395168	0.142078	0.941829	0.446063	0.0122334	0.288854	0.000115369	0.799431	0.463441	0.248003	0.939962	0.328276	0.100303	0.000241555	0.855473	0.259556	0.901007	0.540814	0.0365166	0.0266471	0.00842616	0.00744318	0.582797	0.152239	0.0335664	0.712474	0.453822	0.0583281	0.214873	0.261657	0.213414	0.880532	2.3572e-05
DEINH1	0.0191893	9.72237e-09	4.69501e-09	FALSE	0.132844	0.17022	1.28136	2.14856e-10	0.870903	0.384119	0.207974	0.0671074	2.24475e-05	0.162267	0.0845493	0.938926	0.539796	0.0810811	0.157793	0.000404208	0.14822	0.307307	0.103445	0.8801	0.531324	0.106754	0.000357466	0.619902	0.0985974	0.609352	0.516134	0.0508796	0.027811	0.0108148	0.00121912	0.451361	0.17064	0.00477966	0.521735	0.103253	0.078695	0.394821	0.404159	0.25461	0.943934	5.41394e-05
TEINH18	0.0129946	9.59387e-09	4.30919e-09	FALSE	0.166357	0.210842	1.26741	1.39509e-11	0.806101	0.200187	0.251997	0.15944	0.000493184	0.0443927	0.123788	0.259554	0.474783	0.0223413	0.517488	2.40073e-06	0.165354	0.598584	0.0859496	0.718854	0.316377	0.0492881	0.000677056	0.128253	0.44442	0.314401	0.0494576	0.00321499	0.0280091	0.0175547	0.0162487	0.15274	0.196387	3.01155e-05	0.193988	0.345715	0.0920693	0.307331	0.320705	0.386691	0.963596	2.41754e-05
MEINH5	0.138212	5.50812e-09	5.06081e-09	FALSE	0.101413	0.126442	1.24681	6.67163e-07	0.901746	0.526636	0.796324	0.173415	0.0216993	0.179583	0.336683	0.0826644	0.924599	0.0155809	0.599961	0.0243886	0.503612	0.606295	0.0535513	0.972183	0.338601	0.313647	0.0184995	0.283938	0.112296	0.151311	0.370043	0.0236665	0.0286626	0.110534	0.0985324	0.230193	0.049397	0.350777	0.900106	0.47169	0.0890936	0.0418471	0.172158	0.462563	0.903059	0.00140154
HBINH7	0.00135827	1.91541e-08	6.38871e-09	FALSE	0.0931421	0.126804	1.3614	2.86829e-10	0.706151	0.119468	0.807707	0.528898	0.00432492	0.479517	0.317841	0.727626	0.9009	0.498716	0.180783	0.179972	0.2361	0.847347	0.00701669	0.960323	0.474963	0.537309	0.0549586	0.406536	0.79623	0.480631	0.305542	0.043514	0.031223	0.303052	0.01941	0.286198	0.0967413	0.000660407	0.156764	0.269221	0.130539	0.0325328	0.420431	0.00923167	0.286634	0.0900835
HYPEP3	0.00889385	1.38945e-08	5.86265e-09	FALSE	0.0940007	0.122515	1.30335	2.65524e-10	0.775878	0.459224	0.561736	0.0590099	0.00867949	0.114318	0.172897	0.573599	0.778278	0.00121831	0.639808	0.0170128	0.746001	0.740921	0.146217	0.906804	0.594572	0.00849534	0.00436129	0.146459	0.676364	0.101113	0.608382	0.00134824	0.0317977	8.19704e-06	0.379544	0.716539	0.0108817	0.0954689	0.188084	0.337413	0.895974	0.207312	0.805419	0.186462	0.756675	7.01995e-06
TEGLU2	0.00929341	1.09932e-08	4.67059e-09	FALSE	0.165773	0.210672	1.27084	3.13261e-11	0.32258	0.0961611	0.173746	2.57453e-05	1.12829e-06	0.705376	0.0928781	0.853133	0.797983	0.00128482	0.264369	1.03825e-08	0.27501	0.889318	0.125051	0.967046	0.499614	0.00505168	1.16812e-07	0.187908	0.121658	0.337954	0.349389	0.00102008	0.0321035	9.44824e-05	0.290668	0.929316	0.0108301	8.02219e-11	0.115066	0.333044	0.0443811	0.561844	0.323466	0.251391	0.836087	5.44435e-08
MBCHO1	0.0109777	1.50183e-08	6.55496e-09	FALSE	0.125354	0.163317	1.30284	6.24214e-08	0.107771	0.373954	0.210295	0.38428	0.0159829	0.252302	0.45791	0.5008	0.752018	0.0328752	0.81686	0.0588324	0.087997	0.905686	0.197945	0.652718	0.451422	0.0878851	0.00403313	0.653643	0.308765	0.145697	0.0560628	0.0117609	0.035439	0.0583186	0.00616188	0.0917346	0.245529	0.0312883	0.631719	0.855055	0.30928	0.181937	0.213175	0.44026	0.982246	0.00893822
EPSC	0.986837	-8.19721e-09	3.69016e-09	FALSE	0.124617	0.142051	1.13991	0.0020237	0.155116	0.627086	0.258982	0.996755	0.996728	0.382602	0.202582	0.0479197	0.921615	0.99804	0.233012	0.819976	0.948291	0.538511	0.202359	0.766478	0.274691	0.727661	0.995061	0.524189	0.806744	0.34983	0.364564	0.993275	0.0379505	0.999329	0.0409268	0.146596	0.979386	0.954715	0.641391	0.101755	0.456236	0.553186	0.0955493	0.917229	0.360498	0.997655
PSNP1	0.383927	1.29867e-09	4.39952e-09	FALSE	0.175849	0.211146	1.20073	3.55113e-07	0.134483	0.274344	0.893247	0.212008	0.0858372	0.473778	0.508149	0.210056	0.498143	0.178341	0.839828	0.294286	0.24359	0.597158	0.0560228	0.997508	0.0942467	0.0392294	0.161399	0.108924	0.303827	0.0826838	0.00432867	0.522851	0.0379686	0.497083	0.013263	0.155504	0.365484	0.175198	0.104823	0.899454	0.043571	0.961063	0.0500494	0.709982	0.770717	0.80743
TEGLU1	0.0203586	8.84932e-09	4.32434e-09	FALSE	0.124655	0.158848	1.2743	4.99322e-11	0.140768	0.0182169	0.107579	0.272205	0.000917563	0.201156	0.251831	0.780246	0.552825	3.78459e-05	0.983362	2.0142e-08	0.834077	0.972019	0.234024	0.997682	0.119093	0.0311011	7.72326e-07	0.555937	0.202641	0.59042	0.122298	2.0912e-06	0.0381911	8.6598e-07	0.0760381	0.592097	0.019085	8.82013e-06	0.170165	0.77782	0.0712451	0.910278	0.0622403	0.302512	0.981969	3.95844e-06
HBGLU9	0.00153321	1.45239e-08	4.90506e-09	FALSE	0.15928	0.207542	1.303	1.93839e-12	0.266165	0.104889	0.616054	0.08361	0.000936683	0.365792	0.144328	0.642313	0.287774	0.561866	0.263561	0.0596501	0.200869	0.962696	0.0572468	0.77812	0.169324	0.0495565	0.0137975	0.637719	0.461677	0.399271	0.80392	0.0396521	0.0383955	0.290689	0.0015863	0.401387	0.0250056	0.000117853	0.682298	0.23464	0.0456883	0.195432	0.212546	0.087955	0.83532	0.00608984
TEINH6	0.0698545	8.23189e-09	5.57385e-09	FALSE	0.0722516	0.0937939	1.29816	6.89692e-07	0.318123	0.0681105	0.0802639	0.0428029	0.00564781	0.338472	0.828477	0.1169	0.881869	0.00649741	0.395143	0.00101861	0.553481	0.537788	0.754774	0.732768	0.828526	0.188062	0.00185081	0.261335	0.304171	0.0810643	0.312992	0.00591864	0.0397925	0.00401941	0.693348	0.0728877	0.536207	0.0161258	0.430432	0.191006	0.109613	0.742512	0.90818	0.275733	0.673739	0.00261691
TEINH9	0.014859	1.30635e-08	6.00943e-09	FALSE	0.096582	0.129341	1.33919	4.02967e-08	0.0513434	0.0525452	0.120298	0.344153	3.16564e-05	0.205983	0.484193	0.390452	0.862329	0.207508	0.504435	0.126174	0.191639	0.944558	0.214323	0.998086	0.636621	0.0176235	0.00138268	0.736016	0.49104	0.12755	0.154523	0.172568	0.0456357	0.194764	0.0252117	0.542247	0.338604	0.0035012	0.698028	0.691627	0.0230674	0.492813	0.489426	0.629552	0.999572	0.0400302
ENT7	0.681963	-2.38922e-09	5.04913e-09	FALSE	0.104195	0.120651	1.15794	0.000180325	0.213171	0.46603	0.390039	0.492701	0.100659	0.84978	0.0953541	0.72777	0.200614	0.522336	0.167066	0.820591	0.11609	0.2888	0.75229	0.926783	0.139636	0.654786	0.803648	0.450947	0.098688	0.201502	0.162526	0.78777	0.0464444	0.84496	0.0670767	0.880775	0.848229	0.481999	0.710984	0.315024	0.549486	0.700133	0.300898	0.245196	0.555718	0.949693
TEGLU22	0.0346716	7.25751e-09	3.99604e-09	FALSE	0.198909	0.244915	1.23129	4.47235e-11	0.378655	0.0091328	0.750478	0.17006	2.73847e-07	0.297931	0.0854098	0.364087	0.36275	0.0432205	0.485151	3.38451e-08	0.0352613	0.867029	0.256505	0.973237	0.138317	0.03408	1.15488e-08	0.269025	0.64687	0.347368	0.84145	0.000423756	0.0488521	0.000330698	0.0184314	0.314023	0.00669959	5.73676e-06	0.502368	0.408473	0.201727	0.367534	0.183372	0.919069	0.999882	0.000190789
MSN1	0.0010063	1.13758e-08	3.68344e-09	FALSE	0.182399	0.237482	1.30199	2.06842e-13	0.356724	0.125442	0.0476513	0.119534	6.22321e-07	0.0654249	0.252489	0.450388	0.00860603	0.000607158	0.744925	2.89618e-11	0.0511116	0.687677	0.762462	0.999119	0.116569	0.000760259	2.27616e-11	0.0916623	0.275763	0.122166	0.310681	7.34339e-06	0.0529112	3.19416e-06	0.734542	0.376841	0.000302436	3.58474e-08	0.00216555	0.64297	0.237656	0.676342	0.355876	0.806583	0.99421	5.644e-05
TEINH8	0.0508774	1.401e-08	8.56144e-09	FALSE	0.0565038	0.0771779	1.36589	6.04874e-05	0.505111	0.148583	0.291524	0.244937	0.000137584	0.121873	0.566575	0.252303	0.624212	0.0767886	0.248013	0.126463	0.140329	0.317229	0.308061	0.464417	0.83601	0.256246	0.0321719	0.439865	0.518983	0.35257	0.131305	0.112994	0.0539133	0.189071	0.0417312	0.285499	0.25728	0.00250631	0.521248	0.31291	0.251575	0.78299	0.79602	0.0350295	0.325916	0.0641537
HBGLU6	0.0113356	1.14319e-08	5.01635e-09	FALSE	0.200022	0.254029	1.27001	1.71771e-10	0.456978	0.597728	0.994553	0.277137	0.0354402	0.0417802	0.450685	0.957022	0.754994	0.229406	0.571871	0.0319581	0.826618	0.776942	0.235589	0.996116	0.278599	0.249694	0.00271286	0.609603	0.485938	0.537212	0.280628	0.194292	0.0541028	0.0189065	0.0196472	0.621112	0.0166807	4.32056e-05	0.279249	0.652048	0.163384	0.508884	0.160236	0.656372	0.977855	0.00422161
MEINH11	0.0152652	1.36903e-08	6.32891e-09	FALSE	0.0630628	0.0844827	1.33966	7.81467e-07	0.413967	0.50478	0.810712	0.11508	0.00100341	0.11144	0.0810804	0.0542547	0.967288	0.0143069	0.337726	0.0864645	0.545923	0.118282	0.818508	0.903964	0.90427	7.37386e-05	0.0122134	0.274383	0.0134382	0.218413	0.647428	0.00597309	0.054108	0.0268046	0.577648	0.151123	0.0758044	2.95107e-05	0.0730389	0.225746	0.0526691	0.825463	0.917882	0.752549	0.992126	0.0031984
PSNP2	0.496314	4.38891e-11	4.75029e-09	FALSE	0.133037	0.158699	1.19289	9.70262e-06	0.124322	0.508675	0.849711	0.263643	0.264812	0.49225	0.34212	0.392423	0.379049	0.770874	0.802859	0.909839	0.937085	0.719237	0.111478	0.827482	0.369607	0.243689	0.404446	0.0673092	0.261097	0.300617	0.170878	0.77372	0.0545284	0.920712	0.304267	0.0377824	0.236887	0.208527	0.109577	0.494538	0.152081	0.637438	0.590662	0.384616	0.467349	0.99725
PSPEP3	0.0219949	1.05285e-08	5.22716e-09	FALSE	0.136047	0.174253	1.28083	8.98531e-09	0.111915	0.329079	0.694374	0.484653	0.293983	0.591834	0.174944	0.89648	0.122921	0.0341341	0.855457	0.623912	0.933988	0.742404	0.187779	0.969705	0.0402923	0.252053	0.439498	0.240514	0.23563	0.851618	0.0477976	0.0583376	0.0551887	0.685529	0.00951718	0.148649	0.0611823	0.112717	0.626518	0.700094	0.0376122	0.785703	0.110283	0.579504	0.937135	0.538782
TEGLU11	0.00854557	1.06736e-08	4.47578e-09	FALSE	0.223386	0.278799	1.24806	3.25404e-11	0.572838	0.0013858	0.493778	0.0440426	3.91881e-08	0.2939	0.0435486	0.812156	0.436567	6.51229e-05	0.451404	1.11564e-11	0.0691955	0.985472	0.300704	0.999425	0.0928243	0.00199596	2.73636e-14	0.213447	0.164701	0.328369	0.706681	0.00211615	0.0561837	7.77021e-07	0.183039	0.789408	0.00402372	1.15178e-09	0.0529586	0.46569	0.709359	0.703798	0.0202471	0.865147	0.999748	6.07188e-09
TEGLU20	0.00225866	1.42455e-08	5.01677e-09	FALSE	0.135625	0.176609	1.30218	1.7073e-11	0.582026	0.00424567	0.415156	0.0117142	2.73363e-10	0.0754303	0.0968128	0.661974	0.208163	0.000315226	0.436508	6.64367e-11	0.668208	0.99734	0.120613	0.937826	0.0618695	0.000500142	7.97961e-09	0.0504422	0.215657	0.418223	0.329418	0.00189627	0.0568424	2.23769e-08	0.141259	0.790209	9.6143e-06	6.28815e-10	0.00714884	0.437146	0.286197	0.317935	0.0354674	0.739203	0.997704	2.56604e-11
PSPEP2	0.0250378	9.32685e-09	4.76025e-09	FALSE	0.149879	0.188963	1.26077	1.84613e-09	0.0844886	0.42211	0.580702	0.276109	0.0241705	0.906064	0.18215	0.852647	0.111002	0.0441548	0.585925	0.814288	0.647431	0.786361	0.191482	0.695195	0.110145	0.183623	0.756929	0.356528	0.496443	0.612979	0.0798395	0.486528	0.0601175	0.345697	0.0494257	0.640419	0.0558303	0.229447	0.76228	0.526463	0.100483	0.672414	0.115498	0.968945	0.973464	0.52118
PSPEP7	0.424803	9.38874e-10	4.9513e-09	FALSE	0.0859041	0.104994	1.22222	8.06144e-06	0.163293	0.241459	0.0573726	0.37429	0.158643	0.534966	0.233391	0.689133	0.49374	0.657041	0.591354	0.623267	0.611815	0.800639	0.263463	0.903934	0.259972	0.0735372	0.0867283	0.189538	0.119794	0.0589828	0.049882	0.374695	0.0601653	0.980115	0.171219	0.838763	0.415305	0.830875	0.120942	0.613376	0.0744105	0.693491	0.181233	0.272487	0.396533	0.912017
VECV	0.997778	-1.24505e-08	4.37655e-09	FALSE	0.137902	0.148939	1.08004	0.0972967	0.155216	0.641718	0.552742	0.7334	0.972566	0.305746	0.106408	0.0929726	0.123989	0.999899	0.0186631	1	0.335067	0.650987	0.716327	0.102751	0.0330017	0.905809	0.99997	0.0124444	0.215141	0.0466967	0.119115	0.998228	0.0631282	1	0.227287	0.543457	0.998894	0.989092	0.999881	0.103696	0.207511	0.952142	0.030876	0.941081	0.120259	0.999998
VECC	0.999752	-1.39298e-08	3.99958e-09	FALSE	0.123274	0.131496	1.0667	0.134136	0.188199	0.738138	0.46149	0.943455	0.996631	0.16736	0.325059	0.0690282	0.111213	0.993905	0.0484584	1	0.831372	0.561127	0.642694	0.112933	0.0276104	0.897154	0.999994	0.0591292	0.492847	0.24053	0.0953873	0.979196	0.0636148	0.992813	0.594448	0.786148	0.999938	0.986988	0.987109	0.13089	0.271102	0.891797	0.0492575	0.968002	0.319959	0.999863
ENTG2	0.997494	-1.12907e-08	4.02337e-09	FALSE	0.149219	0.165615	1.10988	0.0122837	0.193075	0.94401	0.572916	0.866122	0.9312	0.869314	0.141481	0.0534682	0.0177869	0.994798	0.0479572	0.999999	0.917761	0.441348	0.578447	0.00334948	0.00143445	0.935647	0.999993	0.268787	0.258627	0.219435	0.0824742	0.953936	0.0653182	0.996023	0.305537	0.0832694	0.99861	0.99916	0.880628	0.12446	0.292327	0.984244	0.00189347	0.932565	0.425314	0.997715
PSPEP8	0.130236	6.30834e-09	5.60603e-09	FALSE	0.0919194	0.117336	1.27651	3.0248e-07	0.196857	0.0765813	0.461674	0.66819	0.16729	0.664782	0.0267386	0.424231	0.274661	0.501858	0.221244	0.347434	0.750857	0.929794	0.0242306	0.8148	0.0742296	0.0731962	0.270524	0.516597	0.0794172	0.503272	0.11433	0.55999	0.0670577	0.576169	0.017191	0.299975	0.136703	0.757542	0.155913	0.268128	0.0117637	0.19366	0.0524278	0.260749	0.355885	0.498127
DEGLU3	0.00884738	9.90488e-09	4.17585e-09	FALSE	0.209004	0.256969	1.22949	8.71517e-11	0.250542	0.0117336	0.841338	0.318195	0.00519688	0.691852	0.683274	0.785359	0.650731	0.0490904	0.95509	0.00078792	0.0963901	0.501982	0.0353039	0.940213	0.571663	0.0116706	0.00089872	0.651949	0.419205	0.319591	0.0491306	0.00265662	0.069692	0.00120238	0.0153752	0.376562	0.0222198	0.0038381	0.07185	0.780922	0.198471	0.115646	0.435112	0.874652	0.991944	8.83423e-05
SYNOR5	0.761556	-3.93964e-09	5.53851e-09	FALSE	0.0830543	0.098038	1.18041	0.000999436	0.149984	0.0255838	0.0977334	0.124876	0.47386	0.143903	0.1469	0.881314	0.735242	0.879138	0.79528	0.944599	0.273103	0.391629	0.724287	0.886957	0.404911	0.651013	0.930541	0.237335	0.256971	0.851865	0.807844	0.98207	0.0704791	0.983799	0.0300152	0.832355	0.813775	0.883295	0.594227	0.820249	0.08314	0.453286	0.252662	0.962423	0.8056	0.999826
OBNBL1	0.0118435	1.20696e-08	5.33541e-09	FALSE	0.0997662	0.130185	1.3049	7.59034e-09	0.201896	0.148354	0.0839883	0.639227	0.015689	0.221104	0.0973719	0.1957	0.158425	0.00236209	0.423922	0.0322877	0.496338	0.781462	0.307745	0.872124	0.0739299	0.0475171	0.0489892	0.478149	0.749218	0.0919674	0.35875	0.0171122	0.0721782	0.0233632	0.0536266	0.00213938	0.0783694	0.0697391	0.212426	0.510428	0.0170949	0.0270038	0.12464	0.0531785	0.284668	0.0185322
HBCHO4	0.00290971	1.92949e-08	6.99653e-09	FALSE	0.129593	0.170725	1.3174	1.2205e-08	0.241668	0.0336495	0.412871	0.317031	8.0578e-05	0.539136	0.618284	0.464561	0.999725	0.00810221	0.934163	0.019588	0.820487	0.653863	0.0933763	0.996817	0.996254	0.00187737	0.00899659	0.401059	0.0754715	0.860595	0.715947	0.030662	0.0767352	0.00307003	0.0190602	0.361301	0.0259032	0.0114059	0.607072	0.894604	0.139618	0.446055	0.54641	0.146616	0.938407	0.00022789
SYNOR2	0.371119	1.94607e-09	5.91704e-09	FALSE	0.112154	0.137201	1.22333	2.66512e-05	0.193965	0.237248	0.0688952	0.0670778	0.105301	0.0527222	0.102046	0.536859	0.296544	0.315699	0.226835	0.59464	0.660108	0.108633	0.190228	0.860381	0.132458	0.0444284	0.472629	0.377536	0.712088	0.168761	0.601271	0.638494	0.0783177	0.574551	0.275954	0.78855	0.692677	0.602366	0.238413	0.122888	0.552149	0.810095	0.128277	0.591212	0.707302	0.938372
SYNOR1	0.796765	-4.21563e-09	5.07832e-09	FALSE	0.114447	0.134224	1.17281	7.86712e-05	0.183255	0.118775	0.370252	0.0468833	0.076173	0.0362569	0.0385131	0.820612	0.55307	0.517569	0.0798477	0.767593	0.19286	0.214713	0.977414	0.756598	0.215822	0.0743434	0.956214	0.167348	0.816755	0.0335519	0.848704	0.895163	0.0798661	0.88987	0.112944	0.840809	0.771867	0.902773	0.371759	0.134904	0.350089	0.811816	0.110344	0.956913	0.706451	0.995487
ENTG6	0.999262	-1.24343e-08	3.91114e-09	FALSE	0.134645	0.148902	1.10589	0.0101452	0.227395	0.687822	0.613206	0.804233	0.989128	0.960204	0.476253	0.0928858	0.0414594	0.992823	0.045452	0.999999	0.714863	0.38033	0.654778	0.0018523	0.00668418	0.577758	0.999953	0.151612	0.42503	0.171702	0.0672605	0.968101	0.0799343	0.974748	0.0884568	0.515238	0.995805	0.998785	0.97997	0.39015	0.17174	0.987212	0.023869	0.848912	0.225269	0.996196
DGNBL2	0.354822	1.70359e-09	4.57544e-09	FALSE	0.0961814	0.119942	1.24704	1.53154e-05	0.27609	0.419343	0.522661	0.111161	0.00868869	0.328867	0.635751	0.664082	0.741074	0.1203	0.77522	0.0271239	0.372255	0.958249	0.508529	0.781549	0.761514	0.224236	0.0243098	0.355546	0.521906	0.202126	0.582455	0.116404	0.090154	0.0715105	0.334321	0.380631	0.573923	0.0176661	0.088314	0.655592	0.339786	0.92291	0.690624	0.986679	0.992377	0.125255
ENTG1	0.992478	-9.64463e-09	3.96682e-09	FALSE	0.151552	0.170006	1.12177	0.00366294	0.149951	0.798624	0.678153	0.784891	0.882064	0.836451	0.128551	0.375109	0.151095	0.992431	0.0493866	0.998043	0.307839	0.616406	0.507393	0.0180062	0.187597	0.324756	0.999988	0.353934	0.124699	0.229286	0.188902	0.86888	0.0901975	0.963903	0.0888073	0.165977	0.999786	0.999093	0.92269	0.121712	0.449363	0.963935	0.264502	0.898864	0.321369	0.989198
TEGLU8	0.0137859	8.79604e-09	3.99217e-09	FALSE	0.230843	0.283507	1.22814	3.86607e-12	0.375111	0.00363204	0.164289	0.0824543	6.44842e-08	0.228311	0.460532	0.854119	0.541101	0.00123244	0.840015	6.30838e-08	0.398446	0.90774	0.588888	0.999744	0.298339	0.000847686	1.35746e-14	0.819727	0.301704	0.14315	0.406965	0.00148013	0.0905898	0.0015024	0.0423809	0.214542	0.000207859	1.0868e-07	0.30563	0.896188	0.150471	0.402972	0.0895303	0.898164	0.99912	3.35826e-05
HBCHO1	0.0355469	1.9673e-08	1.08999e-08	FALSE	0.082892	0.114048	1.37586	5.51156e-05	0.873469	0.0187133	0.744754	0.159289	0.04713	0.611537	0.123205	0.593115	0.235057	0.0667042	0.309364	0.0270219	0.103463	0.758559	0.170444	0.906219	0.557043	0.0504181	0.12102	0.522604	0.767107	0.0798168	0.00707455	0.530337	0.0907983	0.560536	0.370218	0.537788	0.0430438	0.00840546	0.381528	0.37759	0.185179	0.0594587	0.806733	0.305024	0.982544	0.538156
MSN3	0.0559265	5.99114e-09	3.7682e-09	FALSE	0.153427	0.189674	1.23625	6.07734e-09	0.774829	0.0437077	0.129567	0.171692	1.16718e-05	0.0723586	0.53135	0.519798	0.0511623	0.0159403	0.616227	3.29759e-10	0.0864609	0.870912	0.358866	0.987315	0.0493978	0.0279603	8.42724e-08	0.0996837	0.436794	0.242294	0.478837	2.42095e-05	0.0968739	4.10751e-06	0.581793	0.651081	0.0566634	2.40102e-06	0.00289851	0.390359	0.58863	0.865257	0.17574	0.78043	0.983587	1.78216e-05
HBGLU7	0.0095621	1.11503e-08	4.75876e-09	FALSE	0.195862	0.24671	1.25961	8.07466e-10	0.468305	0.0827904	0.954473	0.488089	0.0132822	0.121277	0.199383	0.849897	0.647169	0.283023	0.282273	0.0125059	0.743305	0.872672	0.0490619	0.998388	0.389303	0.168266	0.00280248	0.533782	0.628438	0.484724	0.268341	0.169233	0.0987227	0.0483231	0.0136271	0.674646	0.0145307	2.16757e-05	0.15116	0.440844	0.346756	0.349592	0.266699	0.636196	0.991469	0.00425578
MEGLU5	0.0150569	1.31907e-08	6.08261e-09	FALSE	0.151309	0.195886	1.29461	5.53296e-09	0.713879	0.398964	0.0778297	0.392375	8.31612e-06	0.0161814	0.195852	0.199773	0.488372	0.00911033	0.78473	0.000686027	0.673836	0.672051	0.171756	0.994098	0.234052	0.00556317	0.00010274	0.308492	0.123835	0.163932	0.697308	0.0127797	0.101659	0.0219591	0.00985979	0.0529101	0.218459	0.0347552	0.618332	0.751167	0.0423064	0.584474	0.334263	0.0956932	0.965802	0.000252634
PER1	0.999998	-1.63046e-08	3.53022e-09	FALSE	0.164045	0.174556	1.06408	0.0856228	0.201954	0.865535	0.613463	0.818096	0.998545	0.185054	0.00632689	0.0905883	0.109911	1	0.000129978	1	0.733985	0.398058	0.557332	0.0185913	0.0100114	0.796401	1	0.0505275	0.281128	0.126894	0.11248	0.999443	0.103262	1	0.429866	0.224331	0.999944	0.999533	0.999991	0.000398275	0.164862	0.975027	0.00170032	0.745066	0.0134054	0.999999
PSNP4	0.539021	-5.3513e-10	5.46229e-09	FALSE	0.117174	0.138962	1.18595	0.00016996	0.0892407	0.257984	0.484986	0.513099	0.317803	0.480789	0.274434	0.445226	0.337728	0.836905	0.799339	0.90347	0.675144	0.678341	0.11907	0.975001	0.3037	0.610443	0.583212	0.0576508	0.556295	0.445962	0.319005	0.833598	0.104349	0.974888	0.86582	0.186322	0.696508	0.101792	0.289345	0.56404	0.421546	0.683262	0.314226	0.938341	0.981151	0.998612
HBGLU4	0.0814059	8.91496e-09	6.38755e-09	FALSE	0.0831108	0.105398	1.26817	2.04446e-06	0.384536	0.446948	0.769829	0.517119	0.145237	0.22717	0.381235	0.913094	0.447805	0.228	0.257713	0.208376	0.804272	0.738334	0.703059	0.999949	0.519828	0.208173	0.147089	0.413693	0.925795	0.23556	0.0678896	0.844973	0.107544	0.064834	0.0402274	0.180645	0.396217	0.13241	0.208967	0.274061	0.0281426	0.369386	0.295961	0.578907	0.920928	0.410319
TEGLU18	0.00802744	1.16336e-08	4.83188e-09	FALSE	0.204278	0.257338	1.25975	1.42354e-10	0.721658	0.084683	0.541903	0.0807993	8.53587e-09	0.0305906	0.104054	0.201886	0.55584	0.00387346	0.473788	2.85464e-08	0.0576169	0.838198	0.680821	0.977628	0.612171	0.000299894	1.86743e-09	0.326012	0.404073	0.291681	0.494712	0.00588826	0.113516	5.8678e-06	0.0399563	0.208317	0.000665445	4.07857e-11	0.161221	0.496912	0.296303	0.256301	0.299061	0.685665	0.99799	4.62686e-06
SCINH9	0.0395052	1.21802e-08	6.93454e-09	FALSE	0.0520679	0.0722526	1.38766	1.19692e-06	0.822754	0.389272	0.984065	0.424116	0.0158641	0.436458	0.535927	0.472905	0.222135	0.537913	0.386933	0.548654	0.446731	0.714496	0.378008	0.651715	0.462632	0.033413	0.292488	0.763434	0.799249	0.974941	0.646722	0.479468	0.116462	0.408321	0.149931	0.766401	0.656063	0.138629	0.57142	0.171897	0.257822	0.167033	0.870828	0.102858	0.171639	0.68543
MSN2	0.013727	8.35075e-09	3.78718e-09	FALSE	0.161942	0.207719	1.28267	8.5266e-11	0.171814	0.0236671	0.0367147	0.0539695	1.12427e-07	0.0129027	0.0733712	0.685723	0.0253943	0.00320001	0.339541	2.82133e-11	0.0845708	0.653981	0.645295	0.994415	0.147157	0.00251964	5.31157e-10	0.0471576	0.118635	0.19555	0.313671	1.82007e-06	0.119797	1.16496e-06	0.923964	0.477112	0.00258491	5.92701e-09	0.00232604	0.189092	0.133428	0.384121	0.422487	0.494659	0.973966	1.79646e-05
ACMB	0.966317	-6.77668e-09	3.70468e-09	FALSE	0.124519	0.142797	1.14679	0.00100067	0.126597	0.487121	0.561309	0.501496	0.983968	0.610145	0.864104	0.517715	0.442089	0.831686	0.811244	0.661534	0.975067	0.749331	0.649517	0.28212	0.317654	0.754375	0.798535	0.107155	0.13094	0.288308	0.565188	0.819504	0.123046	0.910371	0.464668	0.509607	0.928362	0.809679	0.26111	0.889716	0.225132	0.255255	0.127855	0.835987	0.199181	0.995719
PSNP3	0.826112	-3.91237e-09	4.16692e-09	FALSE	0.176746	0.203709	1.15255	3.46661e-05	0.192644	0.672409	0.966136	0.642036	0.0872088	0.672781	0.644063	0.200247	0.106902	0.936893	0.969804	0.97299	0.280285	0.394813	0.0769595	0.988062	0.0914219	0.419367	0.855572	0.057401	0.0963485	0.145803	0.131455	0.888037	0.123162	0.993318	0.0478109	0.0214154	0.460654	0.291825	0.0488636	0.829718	0.335004	0.599601	0.161664	0.953249	0.825236	0.995329
MEGLU6	0.00925044	1.28575e-08	5.45866e-09	FALSE	0.164022	0.20636	1.25813	6.33181e-10	0.84125	0.332082	0.157119	0.0530558	7.30947e-06	0.17114	0.207263	0.377316	0.229883	0.00465218	0.631123	8.27562e-05	0.719454	0.422589	0.233105	0.988328	0.156309	0.00422811	2.41768e-07	0.211239	0.0687072	0.424209	0.10077	0.00154581	0.123901	0.000135254	0.0446738	0.0164547	0.000144715	0.000791507	0.22831	0.369733	0.0832652	0.0580408	0.497618	0.362215	0.964776	4.22038e-08
ENTG3	0.99821	-1.16243e-08	3.99053e-09	FALSE	0.147434	0.163298	1.1076	0.0115133	0.205932	0.878647	0.621193	0.863551	0.990889	0.840761	0.434701	0.111576	0.0144063	0.99927	0.0391632	1	0.719771	0.344051	0.678125	0.0151503	0.00684995	0.914455	0.999999	0.165151	0.175031	0.0677798	0.107514	0.984958	0.125021	0.999334	0.180531	0.213668	0.999347	0.994597	0.902197	0.150825	0.258065	0.998936	0.0180795	0.987941	0.674727	0.998876
PSNF3	0.0876325	7.89706e-09	5.82603e-09	FALSE	0.116081	0.147837	1.27357	1.84222e-07	0.0697927	0.347267	0.151885	0.113674	0.0187279	0.682939	0.269088	0.961464	0.334387	0.2034	0.81961	0.462938	0.766393	0.184304	0.0523378	0.982975	0.104619	0.508369	0.622832	0.253917	0.668665	0.960665	0.566339	0.470518	0.125029	0.284569	0.0737758	0.612097	0.730916	0.229615	0.14706	0.923447	0.0560883	0.504682	0.0328923	0.912529	0.974865	0.615746
PER2	0.999966	-1.50955e-08	3.78899e-09	FALSE	0.154557	0.166542	1.07755	0.0467649	0.192374	0.814373	0.695048	0.93909	0.977485	0.231038	0.0523456	0.0449936	0.216312	0.999838	0.000730117	1	0.896967	0.614023	0.571955	0.0271878	0.0311481	0.784595	0.999999	0.215712	0.231018	0.204941	0.230777	0.99235	0.125892	0.999967	0.562089	0.298401	0.999901	0.993892	0.999549	0.00689713	0.141937	0.980071	0.0700796	0.855953	0.0439578	0.999995
ENTG5	0.999531	-1.2791e-08	3.8661e-09	FALSE	0.146467	0.161052	1.09958	0.017595	0.125106	0.746664	0.56466	0.820895	0.96998	0.840129	0.350529	0.244541	0.0360095	0.984895	0.0304634	0.99995	0.987737	0.489882	0.818917	0.00344852	0.0236375	0.827734	0.999994	0.345595	0.571254	0.213276	0.209871	0.923321	0.127133	0.986626	0.333386	0.379017	0.999484	0.997184	0.943704	0.27967	0.199167	0.973562	0.0284417	0.877025	0.370942	0.994148
ENTG7	0.99991	-1.35328e-08	3.61253e-09	FALSE	0.159457	0.172742	1.08332	0.0230531	0.201348	0.749829	0.854158	0.92562	0.999826	0.909405	0.528056	0.58172	0.15505	0.991707	0.0599216	0.99978	0.948278	0.69556	0.680124	0.000852544	0.219185	0.859152	0.999966	0.330621	0.333606	0.303704	0.175646	0.974942	0.127362	0.958632	0.3545	0.563322	0.999953	0.999475	0.979543	0.199314	0.216791	0.946524	0.429335	0.778293	0.220449	0.993876
ACNT1	0.912125	-5.15419e-09	3.80675e-09	FALSE	0.116117	0.137457	1.18378	0.000145853	0.122082	0.97687	0.753989	0.897276	0.907565	0.891603	0.684053	0.905955	0.701631	0.987531	0.302483	0.597296	0.447294	0.91439	0.0758285	0.270948	0.592368	0.585719	0.877974	0.0220915	0.122846	0.274612	0.728794	0.793831	0.127994	0.931213	0.707152	0.930009	0.959216	0.676293	0.8674	0.412111	0.0980674	0.187635	0.251334	0.393609	0.140304	0.739827
DEINH6	0.00764788	1.90657e-08	7.86119e-09	FALSE	0.041562	0.0587631	1.41387	5.55e-06	0.161034	0.0595685	0.694454	0.0215909	0.0604089	0.684952	0.0395345	0.3546	0.272453	0.131844	0.221524	0.168816	0.891847	0.83109	0.0340985	0.489631	0.261543	0.195084	0.594901	0.0771313	0.166403	0.101983	0.434789	0.00749989	0.128091	0.0977573	0.998035	0.138996	0.413011	0.462794	0.101037	0.136452	0.832688	0.193267	0.0893632	0.305748	0.886192	0.376709
MEGLU4	0.00450818	1.62141e-08	6.2089e-09	FALSE	0.113338	0.152574	1.34618	4.76633e-09	0.597647	0.47343	0.0483219	0.0987652	1.18443e-06	0.0655943	0.301726	0.323353	0.134468	0.0574493	0.645832	0.000609149	0.674101	0.969387	0.446135	0.999443	0.354281	0.00445824	0.000373751	0.618244	0.616159	0.236161	0.833861	0.00663521	0.128147	0.00122455	0.150502	0.251072	0.0017773	0.0118206	0.254721	0.597544	0.18385	0.612637	0.764244	0.0785826	0.849657	1.30302e-08
PSPEP1	0.0179516	1.13139e-08	5.39266e-09	FALSE	0.121631	0.155716	1.28024	1.87315e-08	0.0907533	0.750004	0.737168	0.34319	0.0248182	0.549774	0.0599451	0.699411	0.275297	0.149734	0.575358	0.412664	0.966721	0.747462	0.0980374	0.985036	0.132933	0.131162	0.537324	0.570613	0.157775	0.791312	0.468339	0.519637	0.128477	0.467613	0.114623	0.39609	0.283608	0.116737	0.736167	0.417203	0.00997697	0.701651	0.186983	0.778857	0.974014	0.545001
HBCHO2	0.000600091	2.02905e-08	6.26474e-09	FALSE	0.136422	0.177838	1.30359	1.31998e-12	0.509052	0.101455	0.687968	0.362003	0.128458	0.673919	0.130757	0.761433	0.485731	0.0732517	0.265012	0.487935	0.837435	0.741957	0.14346	0.99018	0.623383	0.33209	0.153537	0.26259	0.752932	0.421236	0.525519	0.371545	0.130395	0.378396	0.0660669	0.4668	0.131411	0.0024429	0.29131	0.237519	0.0802951	0.0474333	0.399738	0.444618	0.994421	0.161337
MEGLU8	0.000301591	2.29408e-08	6.68793e-09	FALSE	0.125546	0.172116	1.37094	2.36523e-10	0.587417	0.0451638	0.00982537	0.0247604	1.29043e-05	0.133868	0.724246	0.46784	0.318696	0.000261301	0.655279	2.33857e-10	0.0392647	0.408531	0.0647738	0.735236	0.459316	7.97897e-05	4.15616e-09	0.250288	0.580959	0.0650484	0.457187	3.45754e-06	0.131146	1.05752e-07	0.114177	0.182235	0.00641034	0.0301445	0.0247619	0.789868	0.210539	0.0861648	0.64946	0.0706557	0.794398	1.15445e-08
PSPEP5	0.0406528	1.05974e-08	6.07941e-09	FALSE	0.0817365	0.106025	1.29716	1.66014e-06	0.183779	0.712146	0.486956	0.801951	0.223629	0.637237	0.17539	0.743513	0.146691	0.645738	0.893716	0.71714	0.653497	0.657447	0.469679	0.472093	0.30388	0.200768	0.47801	0.4975	0.227884	0.71483	0.124508	0.908462	0.136669	0.784129	0.380349	0.507893	0.182041	0.226258	0.516464	0.803604	0.227245	0.960024	0.410635	0.761704	0.841175	0.923506
HYPEP7	0.111833	8.64425e-09	7.10385e-09	FALSE	0.041644	0.0536591	1.28852	0.000101765	0.119407	0.130948	0.717665	0.298949	0.186081	0.108134	0.325848	0.145659	0.945619	0.719549	0.816145	0.676918	0.107035	0.448001	0.605956	0.457006	0.995794	0.800077	0.0461644	0.448843	0.62015	0.484101	0.596436	0.825164	0.141269	0.660133	0.174016	0.00448171	0.179683	0.737218	0.169844	0.699395	0.586363	0.415375	0.952254	0.106269	0.113336	0.530823
HYPEP1	0.00173778	1.87184e-08	6.40556e-09	FALSE	0.0931239	0.125985	1.35288	6.49821e-09	0.24616	0.00225632	0.416743	0.0396449	0.00813933	0.474136	0.215181	0.13374	0.781504	0.413766	0.590071	0.0761884	0.228159	0.244067	0.137257	0.316363	0.497566	0.478857	0.215728	0.828572	0.671836	0.0139201	0.24592	0.105111	0.142593	0.189201	0.622412	0.255127	0.163567	0.594766	0.0263431	0.260058	0.387872	0.178867	0.423493	0.234374	0.487469	0.0497572
PSPEP6	0.351367	1.9566e-09	5.1269e-09	FALSE	0.082247	0.101483	1.23388	5.88233e-06	0.234057	0.191284	0.0613715	0.945652	0.0343953	0.890854	0.223304	0.495482	0.159553	0.543626	0.801999	0.24126	0.101199	0.909866	0.244425	0.937455	0.067115	0.0554415	0.426296	0.104427	0.488346	0.127526	0.0100347	0.431076	0.142991	0.948713	0.0717364	0.684236	0.0328622	0.508325	0.0818856	0.708413	0.00891475	0.858266	0.278952	0.691897	0.552378	0.846396
PSNF1	0.0232008	1.11732e-08	5.6098e-09	FALSE	0.120732	0.156791	1.29867	6.27421e-09	0.116947	0.30137	0.0928572	0.115089	0.127322	0.202391	0.136967	0.959609	0.918143	0.0651528	0.601282	0.188419	0.626151	0.375525	0.0378892	0.960694	0.757564	0.117754	0.269869	0.769403	0.11102	0.899311	0.640512	0.289039	0.144342	0.160068	0.0800805	0.76982	0.478189	0.061458	0.0722777	0.683574	0.474191	0.21442	0.54044	0.753548	0.996569	0.308533
PSPEP4	0.0790418	6.22137e-09	4.40748e-09	FALSE	0.125616	0.157879	1.25684	2.14121e-08	0.202054	0.614859	0.488237	0.771492	0.0311683	0.981228	0.605289	0.31883	0.0760499	0.333446	0.896588	0.489422	0.739756	0.901763	0.0959129	0.994192	0.0076004	0.365758	0.22716	0.0618004	0.387382	0.293737	0.162357	0.265889	0.158788	0.904765	0.0883327	0.633582	0.114675	0.143096	0.655334	0.879342	0.135211	0.98594	0.0041897	0.765287	0.969119	0.802151
DECHO2	0.0554765	7.89586e-09	4.95372e-09	FALSE	0.0877819	0.113309	1.2908	2.46936e-07	0.189321	0.250133	0.433665	0.0576308	0.00349742	0.284609	0.190818	0.513264	0.660489	0.0217043	0.319795	0.0540645	0.795066	0.111237	0.752766	0.99876	0.3859	0.0823041	0.140247	0.457932	0.831365	0.522907	0.00861837	0.088951	0.159141	0.0892187	0.0760287	0.0785765	0.0691457	0.0219843	0.281477	0.361551	0.0169891	0.186766	0.0678717	0.246094	0.563117	0.153074
ENTG4	0.992985	-9.19716e-09	3.74401e-09	FALSE	0.161988	0.182813	1.12856	0.000872571	0.213504	0.903577	0.656132	0.774054	0.957722	0.762699	0.387577	0.0546144	0.0540339	0.987738	0.0673128	1	0.944065	0.865696	0.698088	0.00462381	0.00628257	0.915292	1	0.296945	0.391471	0.471834	0.100474	0.997316	0.160274	0.998053	0.23223	0.13558	0.999774	0.999818	0.887202	0.142752	0.36573	0.96287	0.0132014	0.989887	0.8691	0.997397
HBINH2	0.00282375	1.96651e-08	7.10554e-09	FALSE	0.124888	0.163526	1.30938	1.49243e-09	0.0915858	0.18723	0.328683	0.0653207	0.00379317	0.699722	0.326783	0.439332	0.841653	0.00899312	0.401409	0.0610864	0.256648	0.878056	0.164011	0.760154	0.593244	0.01155	0.00221158	0.814084	0.363849	0.194779	0.536866	0.283145	0.160945	0.0354548	0.434727	0.471183	0.205548	0.0170201	0.305727	0.19334	0.176534	0.321062	0.0698481	0.0335706	0.861941	0.00293027
SCGLU3	0.00747385	1.98406e-08	8.15263e-09	FALSE	0.0658338	0.0921438	1.39964	5.06477e-08	0.916152	0.206338	0.441571	0.100048	0.0111764	0.0312841	0.181978	0.780115	0.589822	0.286979	0.874299	0.00132505	0.493643	0.906307	0.0968343	0.834445	0.548109	0.00635792	0.00359348	0.174261	0.419069	0.178747	0.547095	0.0808175	0.161821	0.284606	0.511498	0.0780342	0.1698	0.0706669	0.0958782	0.70518	0.164806	0.17599	0.773768	0.0103585	0.591385	0.0833073
ENMFB	1	-2.29256e-08	3.87198e-09	FALSE	0.0934731	0.0938494	1.00403	0.926132	0.131601	0.997537	0.431396	0.977548	0.999992	0.228967	0.84993	0.000199578	0.00318301	0.996861	0.078643	1	0.901701	0.77344	0.80543	0.000329813	0.00628087	0.948028	0.999999	0.271049	0.576496	0.18668	0.175187	0.999244	0.173571	0.998157	0.786189	0.221831	0.99972	0.999309	0.587855	0.106029	0.0100315	0.99466	0.071735	0.97817	0.488028	0.999883
MEINH9	0.00143733	1.4294e-08	4.79529e-09	FALSE	0.125223	0.166186	1.32712	5.9445e-11	0.762262	0.850445	0.182257	0.0457156	0.00175924	0.15444	0.439888	0.271059	0.865168	0.0351375	0.64649	0.0212059	0.896156	0.699356	0.439739	0.887021	0.389975	0.0216821	0.00180129	0.853046	0.239717	0.373293	0.0808291	0.017108	0.174166	0.00445937	0.0493692	0.439735	0.0672611	0.184832	0.627425	0.60669	0.0356413	0.369733	0.170817	0.338472	0.963987	0.000724554
MSN4	0.0132764	1.03802e-08	4.67991e-09	FALSE	0.168373	0.214241	1.27242	1.36021e-09	0.798637	0.350383	0.0301638	0.195732	8.54857e-05	0.0671054	0.537704	0.773434	0.0224284	0.00018153	0.678659	1.21629e-09	0.136981	0.801476	0.451485	0.998095	0.083244	0.00380565	1.99632e-08	0.145647	0.336311	0.469702	0.483856	1.62995e-05	0.185394	3.47261e-07	0.515455	0.327032	0.00188683	2.24209e-05	0.000551593	0.781031	0.573176	0.868733	0.140863	0.60851	0.972142	3.81198e-07
TEGLU10	0.00117611	1.3163e-08	4.32747e-09	FALSE	0.22621	0.285247	1.26098	2.42567e-13	0.120287	0.000189656	0.728042	0.412054	7.06784e-08	0.551946	0.179982	0.894126	0.568498	3.6948e-05	0.761307	2.8952e-11	0.0427973	0.89542	0.305574	0.99982	0.450473	0.0413921	2.52714e-13	0.683669	0.108437	0.769589	0.645843	0.000608867	0.187191	6.50829e-09	0.109565	0.662757	0.000230628	2.82782e-09	0.343337	0.822503	0.418365	0.569922	0.330577	0.644642	0.999825	7.71481e-11
OBINH2	0.320441	2.00595e-09	4.30031e-09	FALSE	0.115981	0.142435	1.22809	2.77172e-05	0.66533	0.979115	0.16058	0.395024	2.68307e-05	0.541395	0.20239	0.87814	0.76023	0.115156	0.766883	3.9439e-06	0.133482	0.927825	0.800945	0.867698	0.293067	0.03	0.00101134	0.0792181	0.77403	0.246174	0.0625121	0.0565546	0.187533	0.141566	0.35936	0.109014	0.503159	0.00937551	0.10148	0.927933	0.0919201	0.0389887	0.184144	0.257219	0.495425	0.0695438
TEINH3	0.00553724	2.63634e-08	1.03779e-08	FALSE	0.0869525	0.122395	1.4076	1.21508e-06	0.122335	0.0223951	0.0339415	0.104629	0.0191957	0.0117172	0.237596	0.575623	0.717331	0.103256	0.792065	0.0335659	0.240024	0.136934	0.299172	0.961048	0.840727	0.107638	0.0114544	0.26076	0.177955	0.0585525	0.535703	0.160172	0.188247	0.0576115	0.606817	0.181451	0.404918	0.0421291	0.0284712	0.57357	0.0351162	0.0508219	0.822955	0.100166	0.552717	0.000315832
TEINH4	0.00318031	1.48328e-08	5.43607e-09	FALSE	0.0999231	0.131617	1.31719	3.3872e-08	0.148756	0.0214866	0.0825281	0.055198	0.000487588	0.176593	0.272475	0.668055	0.868628	0.000221532	0.213926	0.000350551	0.122976	0.197512	0.202808	0.727952	0.917471	0.0231966	6.09683e-05	0.583198	0.429278	0.301905	0.49392	0.00103199	0.18874	0.000332562	0.624184	0.519684	0.540264	6.05826e-05	0.610311	0.333285	0.0708122	0.888124	0.976312	0.0533674	0.667964	0.000142923
SCINH4	0.000752858	1.89239e-08	5.96295e-09	FALSE	0.0529053	0.0748314	1.41444	1.2438e-09	0.685382	0.0426606	0.204946	0.868617	0.0243228	0.27705	0.468416	0.719397	0.34107	0.893321	0.30252	0.0413145	0.130727	0.977787	0.141693	0.614529	0.092148	0.413262	0.104566	0.339637	0.86613	0.0896847	0.762638	0.0845633	0.18922	0.139415	0.711246	0.458443	0.0283093	0.116393	0.00253884	0.142351	0.608939	0.415018	0.113513	0.0171095	0.138753	0.0340953
SYNOR3	0.95716	-7.25721e-09	4.22265e-09	FALSE	0.158916	0.180881	1.13822	0.000179374	0.130016	0.0613377	0.345555	0.0258771	0.136672	0.0765406	0.212383	0.401678	0.868461	0.747544	0.8004	0.817723	0.207807	0.431605	0.493375	0.95934	0.507063	0.248481	0.574774	0.196451	0.659293	0.221932	0.856714	0.789497	0.189675	0.811869	0.0475044	0.930827	0.929864	0.407923	0.345227	0.740294	0.291732	0.835805	0.340779	0.980405	0.930403	0.981773
MEINH7	0.00104426	1.82331e-08	5.92494e-09	FALSE	0.0787884	0.109882	1.39464	1.2497e-10	0.242739	0.176929	0.753482	0.217766	0.000616962	0.363485	0.151968	0.258319	0.890081	0.370744	0.270656	0.00399255	0.401849	0.877817	0.614122	0.961936	0.572325	0.0259705	0.0190539	0.912226	0.8774	0.844609	0.0859838	0.175562	0.197505	0.146335	0.502425	0.624308	0.0665214	0.10895	0.95852	0.251666	0.208236	0.759852	0.420437	0.323166	0.996503	0.0063209
TEGLU3	0.00303283	1.17345e-08	4.27611e-09	FALSE	0.192964	0.244129	1.26516	1.48343e-12	0.425187	0.00469416	0.351546	0.158508	3.48388e-07	0.359803	0.219177	0.925917	0.441614	0.00135454	0.561309	3.7206e-09	0.862829	0.990715	0.484139	0.999906	0.093668	0.0504572	1.9265e-10	0.172736	0.247168	0.608122	0.492245	0.00167492	0.198243	4.53919e-05	0.247313	0.465242	0.0010279	1.99018e-10	0.280959	0.640112	0.222711	0.697972	0.0391977	0.889162	0.999943	5.30494e-07
SCINH7	0.0545242	8.87685e-09	5.53943e-09	FALSE	0.0523753	0.07171	1.36916	9.16225e-09	0.706582	0.344098	0.943375	0.301987	0.000631631	0.161152	0.600987	0.188221	0.522556	0.09454	0.586843	0.0622406	0.437379	0.889309	0.051921	0.216397	0.174608	0.496359	0.0326984	0.778037	0.861619	0.772115	0.430148	0.00490324	0.2001	0.00223191	0.149861	0.562505	0.0180735	0.00172003	0.299611	0.180573	0.0468627	0.436641	0.217599	0.163892	0.663027	0.00226192
TEINH13	0.0140822	1.24847e-08	5.68783e-09	FALSE	0.149853	0.19049	1.27118	1.62326e-09	0.111841	0.253147	0.0475741	0.20188	2.22956e-07	0.309166	0.711682	0.467967	0.940558	0.000174504	0.944336	3.25961e-06	0.390901	0.860942	0.411478	0.953624	0.849579	0.0461037	6.00317e-05	0.647308	0.173019	0.668285	0.218587	0.00164719	0.201192	0.00450985	0.268307	0.83373	0.00121566	2.82014e-06	0.106069	0.942266	0.0425327	0.441481	0.698454	0.132878	0.977366	6.13208e-05
SCINH6	0.152058	4.59587e-09	4.47222e-09	FALSE	0.090847	0.113712	1.25168	5.07832e-08	0.167413	0.144697	0.542621	0.16446	0.00570126	0.0275584	0.2007	0.634101	0.498804	0.0141448	0.866944	0.0199641	0.515269	0.976983	0.215596	0.512847	0.164433	0.00351963	0.00810312	0.0985097	0.810618	0.380959	0.600704	0.00589361	0.202911	0.00441199	0.480999	0.400157	0.0170587	0.0352731	0.220746	0.714717	0.0903346	0.240638	0.125509	0.170163	0.781183	0.00504867
HBSER3	0.00288359	1.69496e-08	6.13952e-09	FALSE	0.119632	0.155981	1.30384	1.08727e-10	0.165272	0.597637	0.377467	0.637661	0.00098236	0.55193	0.055052	0.64296	0.982068	0.0109213	0.503472	0.0379111	0.312629	0.236623	0.289511	0.81011	0.930122	0.0486991	0.0166478	0.138449	0.200088	0.211879	0.269247	0.00316002	0.207013	0.0226635	0.292822	0.110945	0.360833	0.211838	0.430114	0.25471	0.144223	0.0807567	0.821357	0.440247	0.982796	0.0143572
ENT3	0.500141	-1.4071e-12	3.98461e-09	FALSE	0.159019	0.190427	1.19751	2.79688e-07	0.336757	0.947128	0.461345	0.657389	0.367241	0.458486	0.193299	0.521911	0.0330405	0.959598	0.036721	0.45715	0.260734	0.358708	0.870968	0.0246206	0.0490259	0.669485	0.557226	0.382564	0.702977	0.146951	0.110491	0.919272	0.207877	0.943526	0.564075	0.249314	0.471525	0.400032	0.782327	0.0328018	0.673942	0.205975	0.177177	0.801779	0.527514	0.935774
DEGLU2	0.0721399	6.86822e-09	4.70414e-09	FALSE	0.176296	0.214957	1.21929	6.53468e-09	0.24554	0.192873	0.445396	0.336198	0.00280676	0.545732	0.212117	0.794329	0.648462	0.182067	0.762689	0.021832	0.118926	0.67187	0.0058684	0.997465	0.341781	0.000306386	0.0168419	0.638086	0.528779	0.329041	0.120487	0.0225649	0.208176	0.0153845	0.092882	0.222732	0.00273022	0.000816754	0.245311	0.802133	0.247022	0.22853	0.346281	0.746102	0.980152	0.000379144
SCINH1	0.0311034	1.21079e-08	6.49279e-09	FALSE	0.0581442	0.0797661	1.37187	2.7539e-08	0.391395	0.276757	0.840878	0.676755	0.0400652	0.146923	0.368299	0.274498	0.27148	0.3885	0.122794	0.00556475	0.291665	0.94366	0.0800624	0.53593	0.0126588	0.316395	5.51632e-06	0.209097	0.739738	0.816409	0.882901	0.159506	0.209711	0.0337211	0.158115	0.188878	0.272002	0.00491455	0.283538	0.174014	0.0129423	0.0511281	0.0175366	0.0862856	0.253901	0.00939526
PSNP6	0.0876467	6.35471e-09	4.68847e-09	FALSE	0.16518	0.203663	1.23297	1.85641e-07	0.165272	0.749272	0.894406	0.400056	0.157958	0.560008	0.156259	0.779639	0.355618	0.647297	0.831262	0.812319	0.729773	0.902541	0.318139	0.758621	0.172935	0.097983	0.557675	0.0631132	0.194477	0.675116	0.619216	0.788612	0.210633	0.985612	0.316679	0.365287	0.740266	0.279846	0.408231	0.605597	0.144432	0.635045	0.10236	0.779083	0.941073	0.932097
ENT9	0.0124963	1.01072e-08	4.50907e-09	FALSE	0.172929	0.220552	1.27539	4.66312e-12	0.167282	0.419626	0.357016	0.351734	3.56401e-05	0.0948595	0.333733	0.863389	0.300166	0.150711	0.137016	0.103998	0.0564845	0.402813	0.474919	0.173789	0.265311	0.50784	0.0180908	0.556625	0.341379	0.163701	0.449273	0.0635535	0.211686	0.389097	0.188817	0.390213	0.696684	0.0191426	0.492499	0.146993	0.587361	0.438585	0.0680502	0.257159	0.491671	0.314965
CBGRC	0.00284772	1.71179e-08	6.19134e-09	FALSE	0.0675435	0.0959407	1.42043	2.99181e-08	0.298299	0.115816	0.12886	0.177351	0.0262152	0.315648	0.23746	0.244974	0.678213	0.16986	0.27168	0.00863844	0.813164	0.922272	0.48924	0.673814	0.527209	0.0102543	0.00248803	0.499035	0.527686	0.0466824	0.59348	0.0447777	0.214155	0.0219623	0.728622	0.01034	0.0279314	0.0610862	0.782427	0.364857	0.436357	0.573765	0.740845	0.192745	0.903599	0.0952408
TEGLU15	0.00467151	1.20699e-08	4.64362e-09	FALSE	0.185921	0.235454	1.26642	7.47046e-12	0.135355	0.204799	0.357677	0.394734	0.000178918	0.404356	0.0348548	0.775725	0.354794	0.000266749	0.856529	3.59101e-07	0.57712	0.511326	0.188899	0.932081	0.45429	0.00643364	3.81776e-07	0.543805	0.101795	0.653905	0.37369	0.00408643	0.216507	4.16862e-06	0.102693	0.554556	0.0328544	0.000387739	0.26533	0.773954	0.00742979	0.0194874	0.423718	0.332309	0.913693	1.98738e-07
ENT8	0.00992937	1.74283e-08	7.48317e-09	FALSE	0.143633	0.188118	1.30972	1.37914e-07	0.125852	0.543418	0.262891	0.397227	0.011973	0.0642335	0.0755793	0.198176	0.625891	0.0255319	0.298826	0.238028	0.110937	0.608031	0.142542	0.468293	0.318555	0.195162	0.077588	0.424277	0.443771	0.166764	0.283299	0.368915	0.218423	0.171356	0.128699	0.588247	0.926198	0.228264	0.221538	0.0836534	0.043669	0.06973	0.138096	0.0514122	0.309324	0.344149
OBINH5	0.00613772	2.16779e-08	8.65686e-09	FALSE	0.0551307	0.0824008	1.49464	5.71828e-06	0.746239	0.721076	0.377218	0.615595	0.0998416	0.385889	0.0752104	0.273223	0.662213	0.712577	0.119689	0.000285293	0.578797	0.624574	0.0237284	0.438008	0.315056	0.182347	0.0297177	0.338444	0.15643	0.295055	0.692941	0.371071	0.221602	0.547835	0.950137	0.0527522	0.155569	0.0331744	0.813557	0.155262	0.153737	0.217045	0.361542	0.153572	0.434557	0.274756
DEINH5	0.000208413	2.52587e-08	7.15707e-09	FALSE	0.100997	0.138158	1.36795	1.20583e-10	0.830345	0.319805	0.378298	0.0174835	0.0100844	0.0512375	0.716874	0.370651	0.780486	0.0159072	0.940466	5.47765e-05	0.754985	0.839197	0.742031	0.556483	0.478768	0.0290497	9.89611e-06	0.141116	0.657252	0.151728	0.61211	0.0494586	0.225132	0.00310065	0.668725	0.415117	0.204746	0.0123028	0.455706	0.737339	0.848829	0.355655	0.452035	0.34809	0.955049	0.00169151
CBPC	0.804859	-4.14297e-09	4.82241e-09	FALSE	0.0569902	0.0663207	1.16372	0.013911	0.704056	0.386932	0.343557	0.215308	0.0884305	0.746379	0.706802	0.978379	0.463297	0.731514	0.437037	0.448749	0.195127	0.302082	0.314289	0.997338	0.0968982	0.585204	0.493269	0.173101	0.399275	0.336668	0.531773	0.391298	0.231528	0.816443	0.943553	0.355622	0.46065	0.0652103	0.838437	0.559189	0.668185	0.800353	0.0775002	0.312095	0.511118	0.752497
MEINH12	0.00770294	3.13499e-08	1.29401e-08	FALSE	0.069068	0.102223	1.48004	2.55247e-05	0.2442	0.479244	0.623181	0.18795	0.00158578	0.367203	0.781958	0.206076	0.720978	0.337642	0.96155	0.0973329	0.347525	0.746856	0.937003	0.990601	0.676516	0.0957393	0.0200404	0.91979	0.230579	0.448956	0.278132	0.00351807	0.234356	0.00382833	0.600318	0.687432	0.0262443	0.088808	0.0808107	0.948412	0.313869	0.592788	0.648523	0.107397	0.97937	0.00941327
ACTE2	0.967805	-6.78683e-09	3.66962e-09	FALSE	0.115182	0.133486	1.15891	0.000629515	0.227279	0.972789	0.414477	0.933146	0.981554	0.849866	0.891203	0.957171	0.603545	0.948498	0.855086	0.438228	0.328166	0.821295	0.0641032	0.631896	0.649612	0.580682	0.428844	0.0335001	0.0215171	0.109521	0.71361	0.780988	0.23615	0.862293	0.660455	0.985685	0.903153	0.832202	0.889263	0.808989	0.218629	0.22462	0.393257	0.465451	0.220512	0.488247
VLMC2	0.999995	-1.74025e-08	3.92575e-09	FALSE	0.108907	0.110973	1.01897	0.69975	0.279957	0.999391	0.508149	0.751661	0.999968	0.424223	0.642396	0.408019	0.211902	0.999995	0.174992	0.999998	0.639017	0.567508	0.494016	1.68999e-05	0.100904	0.995949	1	0.212148	0.273825	0.0588216	0.517255	0.999957	0.240588	1	0.805796	0.177968	0.999549	0.999987	0.965731	0.22145	0.033062	0.905573	0.0639668	0.138152	0.000958012	1
SCINH5	0.0315418	1.21121e-08	6.51676e-09	FALSE	0.0806733	0.107952	1.33814	1.76257e-08	0.132803	0.211678	0.781262	0.189878	2.3933e-05	0.0245242	0.0886748	0.397736	0.624402	0.158497	0.24398	0.000871637	0.839705	0.598836	0.441822	0.679115	0.0945592	0.0485365	0.00929574	0.911248	0.0920435	0.575053	0.730136	0.100808	0.244102	0.0581028	0.498733	0.370938	0.0109582	0.000450949	0.182827	0.109166	0.0391795	0.326583	0.0240626	0.431617	0.887172	0.0425538
HBINH6	0.0102181	1.66765e-08	7.19359e-09	FALSE	0.134696	0.175864	1.30564	3.07271e-07	0.0943239	0.644589	0.148442	0.271005	0.000384585	0.332487	0.0837802	0.410234	0.635003	0.2126	0.404138	0.135868	0.109493	0.194497	0.104242	0.990524	0.0855012	0.0169062	0.0790817	0.346085	0.280483	0.138272	0.191315	0.183753	0.244993	0.345779	0.0598903	0.126799	0.258385	0.0625299	0.233217	0.224693	0.292246	0.0634642	0.12237	0.113442	0.843065	0.0932029
TEGLU24	0.00183817	1.32335e-08	4.55592e-09	FALSE	0.212494	0.271744	1.27883	2.00167e-13	0.838144	0.0446103	0.504947	0.0174642	7.53536e-08	0.183888	0.142763	0.229233	0.57052	0.0110172	0.328534	3.39064e-05	0.0299416	0.703097	0.550766	0.999782	0.336538	0.0442615	9.38318e-08	0.112236	0.39845	0.103706	0.873289	0.015166	0.246108	1.95086e-05	0.198168	0.744503	0.000516775	1.8213e-09	0.301999	0.111267	0.605389	0.580447	0.218199	0.612028	0.996394	6.41246e-06
TEINH7	0.0440573	1.2227e-08	7.16943e-09	FALSE	0.066268	0.0886408	1.33761	2.84633e-06	0.0569484	0.042231	0.266241	0.193044	0.00226596	0.543429	0.651674	0.306903	0.49157	0.110645	0.785371	0.00960585	0.0450976	0.246656	0.546854	0.649856	0.601743	0.0191418	0.00238681	0.107308	0.628676	0.0327649	0.682731	0.00793291	0.24683	0.0622737	0.14037	0.709492	0.300129	0.0278029	0.811986	0.871401	0.526801	0.488015	0.944937	0.13302	0.678087	0.0551183
HBSER1	0.0575738	8.62366e-09	5.4737e-09	FALSE	0.131758	0.16452	1.24866	2.63227e-08	0.139565	0.76419	0.418374	0.629472	0.0281191	0.194764	0.118603	0.645636	0.576982	0.0803022	0.697531	0.032929	0.392372	0.52699	0.15988	0.813187	0.822383	0.0660169	0.00207851	0.348594	0.175962	0.129191	0.359552	0.178722	0.256451	0.029564	0.074006	0.219893	0.0492434	0.104652	0.157793	0.566078	0.1163	0.204349	0.518289	0.654608	0.871104	0.0208911
SCGLU2	0.026699	2.93139e-08	1.51753e-08	FALSE	0.061435	0.0907544	1.47724	0.000119073	0.872638	0.814335	0.292136	0.528705	0.00507497	0.0144581	0.165267	0.502427	0.440061	0.22534	0.38671	0.0254869	0.202217	0.994081	0.00853433	0.674222	0.72404	0.0494616	0.055165	0.103362	0.758489	0.418315	0.27044	0.318445	0.258203	0.0739902	0.309519	0.290618	0.371994	0.0380105	0.63898	0.555922	0.0595495	0.0277084	0.911734	0.0204869	0.340989	0.0356889
CR	0.462517	5.20676e-10	5.5335e-09	FALSE	0.0563183	0.0699993	1.24292	0.000203002	0.316791	0.375624	0.581071	0.565997	0.374443	0.0476296	0.963267	0.15533	0.853246	0.234887	0.983528	0.459194	0.809828	0.360733	0.520875	0.120346	0.931015	0.0603758	0.411064	0.267395	0.256575	0.55379	0.623987	0.256816	0.26697	0.265895	0.216911	0.909892	0.862087	0.873376	0.662727	0.977236	0.394988	0.224964	0.57048	0.284693	0.0859322	0.567805
ACNT2	0.801853	-3.19484e-09	3.76635e-09	FALSE	0.119063	0.143232	1.203	2.17081e-05	0.0388229	0.619487	0.892357	0.870601	0.931888	0.651925	0.647663	0.77213	0.569521	0.970416	0.377726	0.396467	0.704385	0.961976	0.408166	0.156179	0.561908	0.616444	0.709379	0.0401104	0.202423	0.486622	0.605523	0.35511	0.270288	0.779794	0.479541	0.814616	0.751758	0.695372	0.488974	0.58037	0.251993	0.168868	0.262123	0.292569	0.0861575	0.668969
HBGLU10	0.0208692	9.60323e-09	4.71644e-09	FALSE	0.0828833	0.105665	1.27487	1.82831e-08	0.59798	0.690519	0.975996	0.07463	2.04479e-07	0.750087	0.295623	0.265696	0.802231	0.406586	0.188546	0.00934991	0.144538	0.889792	0.170102	0.926376	0.686022	0.0259926	0.0150864	0.533442	0.4628	0.103366	0.370341	5.03715e-05	0.270391	0.00802161	0.369201	0.320893	0.000474446	0.0169327	0.137784	0.0817225	0.00137144	0.345921	0.856303	0.443261	0.943924	0.0173853
RGDG	0.98369	-9.41687e-09	4.40713e-09	FALSE	0.0696178	0.0779676	1.11994	0.0245619	0.0719453	0.986264	0.279271	0.898842	0.993941	0.847269	0.968502	0.359205	0.79885	0.945479	0.740105	0.867881	0.941737	0.723361	0.863959	0.114734	0.694729	0.514796	0.846499	0.194934	0.188995	0.369402	0.557098	0.764102	0.271844	0.376293	0.364061	0.819332	0.904815	0.367133	0.88032	0.492789	0.564924	0.925928	0.398887	0.751337	0.505644	0.858229
HYPEP8	0.742891	-4.24266e-09	6.50432e-09	FALSE	0.0424744	0.0496821	1.16969	0.0258773	0.260056	0.00939535	0.754842	0.160915	0.0875518	0.45038	0.865701	0.64994	0.555349	0.80363	0.893911	0.631178	0.597509	0.300556	0.940079	0.787254	0.339398	0.578497	0.588212	0.788148	0.916691	0.747076	0.0201492	0.198217	0.275152	0.769618	0.355433	0.045533	0.168931	0.744628	0.331774	0.77912	0.018289	0.995657	0.534443	0.732443	0.795629	0.936242
OEC	0.992113	-9.53597e-09	3.95012e-09	FALSE	0.112843	0.123534	1.09474	0.0579699	0.228842	0.975595	0.413583	0.754458	0.980405	0.570522	0.605856	0.880326	0.532646	0.999818	0.697259	0.996078	0.925193	0.310107	0.507005	0.426266	0.60628	0.436443	0.997234	0.0463127	0.132088	0.0779921	0.325583	0.998445	0.279771	0.860654	0.783772	0.907521	0.999998	0.997369	0.992265	0.656608	0.924816	0.932477	0.570898	0.601327	0.152858	0.922338
ACOB	0.895171	-4.4431e-09	3.54171e-09	FALSE	0.119602	0.141063	1.17944	4.04656e-05	0.157452	0.825561	0.45208	0.789952	0.96664	0.769727	0.827682	0.648081	0.933988	0.988482	0.722958	0.458481	0.88554	0.773016	0.438003	0.65049	0.972291	0.919119	0.628166	0.0326795	0.0951776	0.162327	0.789812	0.290866	0.284065	0.886785	0.612997	0.999347	0.681506	0.829319	0.836351	0.76056	0.661049	0.3628	0.630081	0.543971	0.303387	0.756294
TEINH20	0.0624536	9.28313e-09	6.04962e-09	FALSE	0.129479	0.16415	1.26778	9.65402e-08	0.256929	0.343041	0.191775	0.00988884	1.13168e-07	0.0651412	0.286532	0.360326	0.64933	0.0116138	0.547736	0.000161842	0.221426	0.88653	0.0291077	0.994546	0.403275	0.0731727	3.13613e-05	0.862056	0.53385	0.426273	0.435905	0.0455255	0.284648	0.0101491	0.284916	0.811486	0.0577232	3.40648e-05	0.131698	0.814376	0.0844545	0.410899	0.363962	0.658554	0.998856	0.00011917
OBDOP1	0.145993	6.18716e-09	5.87143e-09	FALSE	0.0724065	0.0915442	1.26431	0.000228755	0.0666108	0.524097	0.333257	0.310934	0.00736431	0.383717	0.0824475	0.439212	0.476943	0.0269303	0.0921465	0.0193648	0.47136	0.139902	0.548273	0.276012	0.0441719	0.233831	0.00331268	0.651611	0.568071	0.308813	0.0332384	0.00713949	0.29088	0.027366	0.72055	0.0394302	0.0479108	0.204549	0.310024	0.136896	0.0258919	0.103371	0.0217912	0.113971	0.241507	0.00367954
VECA	0.998233	-1.06828e-08	3.66231e-09	FALSE	0.125861	0.139951	1.11195	0.0105138	0.133279	0.883864	0.837195	0.982465	0.999834	0.149636	0.00340861	0.0831091	0.306396	0.999998	7.26994e-05	1	0.927399	0.636964	0.696105	3.74639e-05	0.105546	0.930044	1	0.0482257	0.0468887	0.20545	0.123048	0.990285	0.291812	0.999958	0.703851	0.314928	0.999986	0.999973	0.982718	8.06797e-05	0.17862	0.818479	0.0720847	0.596193	0.000780374	0.999778
MEINH13	0.000300814	2.20291e-08	6.42084e-09	FALSE	0.101483	0.138028	1.3601	8.21102e-11	0.133152	0.26781	0.107231	0.0560635	6.79775e-05	0.109845	0.60106	0.423576	0.951858	0.0858388	0.83035	0.0345687	0.143597	0.817747	0.375153	0.607777	0.969441	0.000224549	0.016664	0.233009	0.363023	0.164954	0.0991303	0.0417692	0.303902	0.00127616	0.444169	0.0512999	0.0403276	0.109035	0.230244	0.812963	0.223853	0.241877	0.771837	0.187181	0.953743	0.00212944
TEGLU7	0.0329889	7.85569e-09	4.27271e-09	FALSE	0.239491	0.291755	1.21823	1.41541e-10	0.552326	0.0937125	0.612962	0.0865057	4.69561e-08	0.0374329	0.0410944	0.823851	0.859906	0.0749121	0.618545	5.1535e-08	0.110735	0.898618	0.268196	0.998558	0.699321	0.00343682	1.48461e-07	0.164446	0.104362	0.194341	0.438244	0.00652276	0.305014	0.000596239	0.198624	0.527852	0.0166454	2.78288e-06	0.428773	0.44838	0.315459	0.476857	0.458629	0.78112	0.984852	3.61216e-06
ENT4	0.681326	-2.19166e-09	4.64917e-09	FALSE	0.159192	0.189509	1.19044	1.3143e-05	0.285218	0.73843	0.672145	0.419012	0.415692	0.62143	0.188204	0.479364	0.0430893	0.936497	0.0235352	0.702413	0.918691	0.453583	0.924271	0.00644556	0.00961184	0.189366	0.678826	0.407406	0.162885	0.165571	0.321046	0.611728	0.310974	0.658863	0.692338	0.311637	0.993909	0.521095	0.947874	0.101259	0.428873	0.325159	0.0165827	0.840914	0.568103	0.772957
SCINH3	0.0276715	2.92792e-08	1.528e-08	FALSE	0.0627529	0.0938099	1.49491	0.000173441	0.561811	0.0438543	0.231082	0.518399	0.0837124	0.0725411	0.0554437	0.379987	0.581973	0.263442	0.0912926	0.0483585	0.0753856	0.690576	0.513298	0.4083	0.667856	0.0019965	0.112363	0.474547	0.0267652	0.138244	0.659463	0.122685	0.312285	0.100755	0.526416	0.263603	0.176511	0.115767	0.0636083	0.0202223	0.0514504	0.112186	0.396775	0.0496228	0.342021	0.473888
CHOR	0.999968	-1.30779e-08	3.26895e-09	FALSE	0.152739	0.162626	1.06473	0.0826467	0.0441813	0.890683	0.680246	0.998296	0.923263	0.892093	0.390657	0.298235	0.800507	0.999885	0.229935	0.972597	0.55025	0.543199	0.645246	0.0673386	0.603716	0.99727	0.99966	0.0833144	0.0375115	0.756836	0.199855	0.999988	0.318764	0.999994	0.0519289	0.758802	0.984501	0.99495	0.998998	0.240572	0.541001	0.940707	0.599175	0.796728	0.179167	0.999944
SYCHO1	0.794055	-4.37728e-09	5.33443e-09	FALSE	0.0855987	0.0995572	1.16307	0.000750911	0.0703615	0.417602	0.255774	0.247966	0.0795808	0.454964	0.293892	0.554515	0.606909	0.499283	0.214993	0.849314	0.926984	0.74287	0.398017	0.75258	0.070283	0.0478571	0.847153	0.865319	0.726664	0.753067	0.308291	0.69358	0.320175	0.975357	0.160914	0.192877	0.622629	0.770458	0.795072	0.650901	0.224156	0.918535	0.018515	0.943838	0.855921	0.996997
MEINH14	0.0592362	3.13477e-08	2.0079e-08	FALSE	0.0374455	0.056972	1.52146	0.0122114	0.909042	0.0833225	0.34635	0.00711217	0.438038	0.481067	0.0724007	0.276932	0.635439	0.0400154	0.27473	0.0316864	0.290113	0.433311	0.265084	0.360733	0.335079	0.153154	0.0702679	0.573911	0.741386	0.22766	0.301882	0.0597805	0.324804	0.0302981	0.476042	0.005779	0.0427927	0.265835	0.179832	0.49835	0.133701	0.23012	0.0814037	0.335037	0.919746	0.0172828
TEINH14	0.0640561	7.13328e-09	4.68805e-09	FALSE	0.121798	0.153251	1.25824	1.02318e-07	0.171921	0.0545849	0.387136	0.0315632	3.75144e-05	0.562979	0.724388	0.489847	0.957519	0.00184935	0.901483	3.86357e-06	0.427348	0.724476	0.338304	0.908665	0.759676	0.00353449	9.62277e-07	0.88992	0.43281	0.673211	0.985014	0.000380293	0.332028	0.000141661	0.546147	0.77079	0.346429	0.000462746	0.552981	0.734425	0.146006	0.934714	0.839564	0.64054	0.99597	0.0001784
TEINH10	0.0939381	7.10771e-09	5.39735e-09	FALSE	0.131406	0.166981	1.27072	3.234e-07	0.113584	0.0239451	0.160217	0.0846217	0.0402039	0.23506	0.684683	0.485069	0.966335	0.0185303	0.955938	0.0278244	0.151091	0.947095	0.358463	0.956668	0.779112	0.00301915	0.000939998	0.456344	0.382928	0.215096	0.854454	0.0517426	0.34032	0.131467	0.289625	0.772706	0.516512	0.054362	0.194536	0.971831	0.0552674	0.403223	0.614233	0.664847	0.99992	0.0417754
TEINH21	0.101873	7.16204e-09	5.63519e-09	FALSE	0.109902	0.138382	1.25915	5.17499e-07	0.113319	0.467791	0.441298	0.0406828	0.0114736	0.0967485	0.332895	0.125913	0.611514	0.377438	0.578058	1.77308e-05	0.11645	0.619372	0.036713	0.726254	0.580243	0.0868497	0.00111782	0.734648	0.69584	0.475182	0.115796	0.262034	0.347012	0.231852	0.099713	0.0247289	0.173017	0.00239924	0.188129	0.732628	0.0405076	0.0465671	0.597261	0.379344	0.994342	0.176725
SYNOR4	0.967682	-8.83856e-09	4.78337e-09	FALSE	0.139386	0.158204	1.135	0.0013221	0.152629	0.202337	0.732856	0.0682617	0.0937152	0.117626	0.204794	0.704449	0.706947	0.747839	0.487299	0.993959	0.374025	0.634898	0.751728	0.912448	0.321335	0.233187	0.880209	0.294295	0.451169	0.269485	0.486208	0.975	0.350648	0.970765	0.0474543	0.760678	0.951302	0.520684	0.49417	0.479738	0.14106	0.844035	0.348138	0.989719	0.943698	0.992305
DECHO1	0.00650516	1.19126e-08	4.79672e-09	FALSE	0.154902	0.194085	1.25295	6.61047e-11	0.185283	0.116467	0.410205	0.12777	0.00609962	0.22088	0.240639	0.577118	0.788633	0.107346	0.725972	0.00149566	0.228341	0.97862	0.0845086	0.295304	0.735144	0.0219762	0.000734986	0.971734	0.51997	0.824367	0.583804	0.114795	0.35124	0.147642	0.387715	0.323261	0.290726	0.0326637	0.582548	0.85914	0.281219	0.549387	0.224238	0.71828	0.993832	0.263661
OBNBL4	0.234544	4.75928e-09	6.57393e-09	FALSE	0.0452524	0.0589752	1.30325	0.000362401	0.705262	0.931311	0.326718	0.605793	0.207987	0.576691	0.695545	0.743858	0.348034	0.796067	0.942945	0.252683	0.0922514	0.978052	0.791116	0.299864	0.408207	0.92842	0.467977	0.977944	0.979328	0.833486	0.820509	0.136956	0.351285	0.216206	0.506564	0.940932	0.709462	0.0887293	0.170529	0.905474	0.678163	0.488994	0.47015	0.419016	0.835588	0.601789
TEINH2	0.024352	9.93885e-09	5.0421e-09	FALSE	0.160492	0.200465	1.24907	7.68102e-10	0.390422	0.011715	0.413527	0.0677128	1.46814e-07	0.143074	0.594457	0.580737	0.935079	0.00665931	0.78208	1.95115e-05	0.119636	0.471172	0.14602	0.963637	0.76546	0.00516258	1.21681e-05	0.369659	0.539338	0.493759	0.8572	0.0102279	0.360902	0.00676153	0.580257	0.409736	0.0190018	9.08639e-05	0.495457	0.8045	0.683315	0.315136	0.335222	0.715473	0.999288	0.00975505
MEGLU9	0.00203036	1.57497e-08	5.4812e-09	FALSE	0.128651	0.167326	1.30063	2.25056e-10	0.516259	0.0221195	0.0667071	0.0568162	0.0277585	0.0517415	0.872006	0.143027	0.340627	0.00251575	0.890242	3.50064e-07	0.205467	0.944129	0.0495402	0.96326	0.333582	0.000837702	8.47951e-07	0.57289	0.692037	0.183662	0.354793	0.000398767	0.367406	3.89291e-06	0.562522	0.265696	0.063855	0.104022	0.0775936	0.903809	0.214477	0.0647821	0.493229	0.699488	0.998962	8.83209e-07
TEINH19	0.0130112	9.80317e-09	4.40418e-09	FALSE	0.181145	0.226509	1.25043	2.78483e-13	0.116351	0.181572	0.0156307	0.190957	1.24842e-05	0.123716	0.472026	0.354953	0.533911	0.00307302	0.761674	2.28355e-05	0.268789	0.824397	0.248194	0.980613	0.526838	0.0192826	0.00544762	0.529634	0.565275	0.615373	0.368935	0.000479874	0.370373	0.00247426	0.092897	0.462828	0.183165	7.2808e-05	0.188081	0.890627	0.0128412	0.219583	0.347859	0.754126	0.999688	0.000483331
MEINH1	0.0881487	8.82243e-09	6.52429e-09	FALSE	0.0464638	0.062161	1.33784	9.03271e-05	0.792532	0.36996	0.835999	0.270827	0.0241388	0.0677153	0.551836	0.894272	0.747501	0.0785513	0.361916	0.182898	0.381642	0.292144	0.896915	0.982762	0.810073	0.182308	0.067273	0.786463	0.7328	0.407942	0.469303	0.0243697	0.371204	0.0150552	0.0355746	0.62443	0.689327	0.0292212	0.0252261	0.792366	0.452448	0.668348	0.658164	0.610506	0.902916	0.0715313
TEINH11	0.00111245	1.472e-08	4.81292e-09	FALSE	0.201642	0.25699	1.27448	6.17668e-12	0.120523	0.0296277	0.399134	0.0753398	0.000136215	0.610861	0.503521	0.649821	0.722457	0.00059934	0.820604	0.000360611	0.0601409	0.625095	0.38645	0.909159	0.921168	0.00538804	4.11505e-05	0.686234	0.591754	0.431351	0.638993	0.00716671	0.371945	0.000534171	0.17129	0.332031	0.0212503	0.000110645	0.05836	0.569798	0.0538544	0.792802	0.622562	0.595275	0.998285	7.85522e-08
MSN5	0.00923993	1.07416e-08	4.55953e-09	FALSE	0.107588	0.141264	1.31302	1.68817e-09	0.906355	0.0839877	0.0520539	0.206791	0.0030566	0.170262	0.179205	0.230578	0.122876	0.00290984	0.211104	3.1272e-07	0.101034	0.599326	0.0892137	0.941492	0.273516	0.233682	5.0062e-07	0.0992474	0.762983	0.63075	0.469368	0.00284316	0.373494	0.000120908	0.229351	0.239009	0.00623581	5.80136e-05	0.0254854	0.314652	0.1098	0.57774	0.768408	0.660021	0.996303	5.01146e-06
TEINH15	0.00119004	1.33594e-08	4.39715e-09	FALSE	0.154762	0.202274	1.307	1.58511e-10	0.169707	0.379102	0.299157	0.0231271	2.14337e-06	0.402855	0.357802	0.394217	0.836996	0.000458151	0.692558	3.09538e-07	0.744128	0.587085	0.67183	0.695013	0.467744	0.0115132	0.000589905	0.650984	0.156119	0.343596	0.863333	0.00187789	0.376874	0.000421929	0.50148	0.96989	0.672498	0.000150417	0.0216028	0.48693	0.379354	0.443865	0.288303	0.579564	0.943484	5.72716e-05
TEINH16	0.0154934	9.90479e-09	4.59141e-09	FALSE	0.155788	0.197651	1.26872	1.35579e-09	0.177995	0.136306	0.187547	0.014881	0.00129564	0.342111	0.369872	0.882382	0.999452	4.64025e-05	0.69538	3.12571e-05	0.319149	0.965473	0.0225515	0.791757	0.971911	0.0106599	7.47291e-06	0.335565	0.0788964	0.328893	0.831207	0.0263684	0.37812	0.00495169	0.421312	0.787347	0.807655	0.000310649	0.093482	0.564163	0.0482134	0.803456	0.922096	0.651317	0.999191	0.00228171
ACBG	0.984672	-9.3252e-09	4.3142e-09	FALSE	0.0877779	0.0968908	1.10382	0.0630261	0.316491	0.920358	0.191488	0.524855	0.97054	0.966395	0.782747	0.72925	0.390328	0.991161	0.428161	0.249684	0.999665	0.790064	0.421298	0.194255	0.3848	0.856008	0.890465	0.25282	0.463423	0.357596	0.766199	0.579607	0.391522	0.979045	0.68186	0.854172	0.999411	0.843907	0.822331	0.541937	0.144715	0.656475	0.394631	0.48574	0.337593	0.992326
MBDOP2	0.0623457	7.38427e-09	4.80942e-09	FALSE	0.0980606	0.121825	1.24235	4.90298e-08	0.135617	0.00471039	0.493566	0.27624	0.00214364	0.239294	0.229214	0.868541	0.283229	0.0190958	0.707036	0.14889	0.0545264	0.588373	0.0880443	0.96473	0.513468	0.166447	0.0163431	0.275259	0.652274	0.2377	0.52921	0.136809	0.394626	0.0116639	0.305649	0.100458	0.0241218	0.104431	0.133214	0.428356	0.204749	0.00691678	0.458939	0.433865	0.988846	0.0059757
HBSER2	0.0100741	1.16624e-08	5.01915e-09	FALSE	0.163395	0.201801	1.23505	4.07398e-10	0.0908306	0.561651	0.537131	0.476988	8.55401e-06	0.531691	0.134587	0.703857	0.695095	0.0851906	0.665209	0.0962494	0.294059	0.252276	0.531802	0.884981	0.736725	0.0562377	0.00585861	0.213941	0.0985165	0.197088	0.763519	0.00732733	0.398359	0.0102095	0.0188234	0.0438253	0.0850474	0.0437176	0.277791	0.334618	0.123374	0.164351	0.478579	0.206811	0.884631	0.00196331
HBINH4	0.000658251	1.87437e-08	5.83487e-09	FALSE	0.0971147	0.131415	1.35319	2.4077e-10	0.12846	0.383464	0.147416	0.401646	5.91133e-05	0.345035	0.0900612	0.597675	0.774305	0.0256599	0.491447	0.0293179	0.185132	0.0986668	0.348144	0.968891	0.696521	0.0350951	0.00060164	0.450291	0.14395	0.108729	0.0599281	0.0236349	0.399413	0.00737924	0.0185593	0.23612	0.0265825	0.000985958	0.120966	0.228056	0.122619	0.0954297	0.591901	0.0337435	0.806294	0.000220652
PER3	1	-2.09884e-08	4.13121e-09	FALSE	0.0737897	0.0736751	0.998447	0.976491	0.181958	0.907127	0.834559	0.992796	0.794769	0.308973	0.0505887	0.0600599	0.501864	0.999922	0.0011842	0.99932	0.780967	0.140037	0.448584	0.123194	0.147708	0.932767	0.999783	0.672576	0.250489	0.533512	0.463845	0.999079	0.403353	0.999912	0.428257	0.57734	0.999978	0.998743	0.998304	0.0105846	0.0434432	0.941724	0.164454	0.53014	0.028573	0.999759
HYPEP6	0.241753	3.67513e-09	5.24513e-09	FALSE	0.0795936	0.0952396	1.19657	3.71123e-05	0.740914	0.0161064	0.658097	0.0891536	0.0612039	0.518894	0.407313	0.320022	0.273305	0.186194	0.836943	0.00271866	0.319457	0.565489	0.166256	0.991712	0.103233	0.0242843	0.02604	0.025153	0.741614	0.0695777	0.038992	0.307736	0.407366	0.0492885	0.142363	0.00889411	0.0805168	0.0457227	0.158904	0.540949	0.163831	0.743878	0.139069	0.789511	0.992547	0.0855431
MSN6	0.238975	4.37599e-09	6.16682e-09	FALSE	0.0629234	0.0774992	1.23164	0.00150232	0.645058	0.0880576	0.228373	0.351089	0.110589	0.110226	0.092031	0.975251	0.0124755	0.0735642	0.252781	0.00264716	0.301255	0.769208	0.395276	0.890744	0.0648352	0.314666	0.00105843	0.122513	0.430193	0.331832	0.914727	0.024406	0.420127	0.0641518	0.490025	0.33953	0.111282	0.115694	0.025217	0.431591	0.0735291	0.659024	0.299479	0.360629	0.757774	0.0761566
SCINH10	0.00383604	1.55566e-08	5.8348e-09	FALSE	0.0562348	0.0771045	1.37112	1.19031e-09	0.714455	0.21294	0.844726	0.102884	0.0297082	0.124896	0.795413	0.822439	0.740513	0.372357	0.764042	0.0418225	0.0697157	0.442517	0.100873	0.232658	0.663649	0.113352	0.121154	0.18392	0.465738	0.1738	0.95634	0.102692	0.432485	0.20877	0.977216	0.957558	0.0655872	0.0128745	0.302516	0.543444	0.225499	0.129044	0.908822	0.269563	0.546201	0.212492
DGGRC2	0.00215663	1.12595e-08	3.94477e-09	FALSE	0.142906	0.185884	1.30074	4.30559e-11	0.826329	0.474175	0.180663	0.292683	2.53206e-07	0.0738614	0.098367	0.163642	0.34547	0.0335271	0.38774	7.58863e-07	0.0424585	0.506582	0.448572	0.740644	0.413778	0.00998986	4.94532e-05	0.191094	0.876567	0.117291	0.295341	0.00203542	0.434896	0.000823164	0.556962	0.979802	0.020532	0.000329936	0.410499	0.316483	0.629955	0.86198	0.390495	0.378837	0.773564	0.000383215
MBDOP1	0.00796327	3.14432e-08	1.30438e-08	FALSE	0.0593948	0.0925119	1.55757	6.31467e-05	0.417395	0.025735	0.449461	0.357023	0.415227	0.0811511	0.703834	0.632078	0.916481	0.0219973	0.971299	0.0334022	0.160251	0.506489	0.402635	0.375063	0.757271	0.347021	0.0110356	0.181373	0.942916	0.0549571	0.575664	0.0722283	0.438966	0.0281186	0.871599	0.729255	0.605871	0.957997	0.183606	0.815355	0.155598	0.0317827	0.542946	0.0566617	0.712225	0.0559567
SCGLU8	0.176614	7.58972e-09	8.17553e-09	FALSE	0.0413041	0.0560362	1.35667	0.000161876	0.838913	0.602682	0.207869	0.774263	0.218642	0.172986	0.489724	0.861495	0.293343	0.0289887	0.313709	0.104144	0.189276	0.296073	0.0107307	0.605135	0.140876	0.170826	0.567058	0.301282	0.581489	0.167054	0.190634	0.147434	0.444234	0.0816715	0.00293854	0.503119	0.107363	0.188871	0.211042	0.426971	0.013853	0.437348	0.113369	0.581065	0.951023	0.239727
HBSER4	0.0180797	1.42297e-08	6.7918e-09	FALSE	0.162106	0.204181	1.25955	1.79125e-08	0.0767543	0.22905	0.874371	0.0846242	0.0219177	0.854753	0.155477	0.804176	0.402708	0.326111	0.742649	0.137215	0.316374	0.296578	0.396656	0.905637	0.577977	0.00304352	0.0335733	0.24156	0.505859	0.231889	0.302515	0.0391944	0.446313	0.0446243	0.221253	0.457097	0.379179	0.12185	0.625997	0.498506	0.417253	0.214882	0.575316	0.446757	0.897294	0.00361807
NFOL1	0.466656	3.17535e-10	3.79465e-09	FALSE	0.135275	0.164115	1.21319	2.24092e-05	0.868598	0.733899	0.356629	0.528965	0.737311	0.952161	0.886287	0.635524	0.616878	0.871521	0.740732	0.0961007	0.435397	0.344974	0.799386	0.98565	0.183091	0.246555	0.501747	0.736416	0.47791	0.905533	0.565153	0.455074	0.455664	0.707834	0.387049	0.105351	0.642891	0.181781	0.706628	0.863233	0.903425	0.399729	0.240877	0.749398	0.616612	0.278271
CBINH1	0.017489	1.12141e-08	5.31822e-09	FALSE	0.0805447	0.109884	1.36426	2.52423e-07	0.175672	0.154192	0.617172	0.207427	0.00453199	0.0989999	0.122033	0.913359	0.39565	0.109738	0.264589	0.0582257	0.74709	0.654836	0.894411	0.999807	0.203383	0.00211776	0.0393526	0.890789	0.354069	0.429619	0.325137	0.00490365	0.455883	0.00563105	0.1778	0.692767	0.268335	0.00711766	0.0105218	0.432046	0.399981	0.937409	0.363249	0.338196	0.948358	0.00376405
HBINH9	0.00045696	2.00886e-08	6.0585e-09	FALSE	0.106759	0.14463	1.35474	1.32229e-11	0.397373	0.531574	0.507449	0.57757	0.00478592	0.575194	0.272663	0.691495	0.611844	0.119878	0.233058	0.0337841	0.0821962	0.604271	0.0151037	0.689101	0.873782	0.0593184	0.000127451	0.87607	0.21428	0.187669	0.627447	0.117796	0.456378	0.0729174	0.525934	0.712019	0.0171967	0.000272482	0.0175192	0.228554	0.0367747	0.101573	0.833661	0.0575229	0.587372	0.0222348
ENT2	0.726149	-2.49856e-09	4.15592e-09	FALSE	0.174373	0.204176	1.17091	8.72205e-07	0.412718	0.777713	0.633027	0.636304	0.0496537	0.280795	0.138545	0.522618	0.0230931	0.88963	0.0228707	0.485334	0.395182	0.56831	0.519377	0.158693	0.0789969	0.498089	0.656748	0.696735	0.833657	0.435191	0.138144	0.788747	0.461914	0.910123	0.396223	0.777241	0.643224	0.297806	0.904814	0.0116754	0.438902	0.765011	0.161568	0.754896	0.620379	0.969889
RGSZ	0.866152	-5.02414e-09	4.53286e-09	FALSE	0.0812273	0.0961296	1.18346	0.00212803	0.11183	0.588069	0.939807	0.792265	0.9311	0.758003	0.729931	0.674521	0.975351	0.997086	0.585783	0.981581	0.54694	0.943183	0.532084	0.290357	0.966968	0.63756	0.940134	0.0237797	0.0606459	0.0693295	0.518479	0.995308	0.467641	0.987965	0.362479	0.831907	0.800758	0.773468	0.933306	0.422261	0.560073	0.695307	0.549502	0.543027	0.277282	0.956828
HBGLU1	0.00928468	1.49728e-08	6.36042e-09	FALSE	0.131959	0.168904	1.27997	5.34704e-08	0.10875	0.851424	0.806071	0.54238	0.00441173	0.554763	0.750068	0.863186	0.590284	0.269594	0.952347	0.0865602	0.643285	0.923256	0.588491	0.664481	0.510052	0.078472	0.000245159	0.251541	0.103192	0.387658	0.111432	0.304585	0.469245	0.186467	0.305745	0.462578	0.00195804	0.143161	0.55893	0.913172	0.0962302	0.90785	0.400995	0.635642	0.998791	0.0292731
ENT6	0.431472	7.32348e-10	4.24237e-09	FALSE	0.136038	0.160284	1.17823	6.61763e-06	0.431845	0.767449	0.478741	0.825016	0.132054	0.57384	0.461942	0.473403	0.593467	0.834814	0.540596	0.617293	0.720455	0.644181	0.573789	0.430315	0.388353	0.214463	0.303225	0.827342	0.782067	0.248272	0.196195	0.494545	0.484674	0.86079	0.95186	0.987418	0.719965	0.720544	0.980131	0.298526	0.262591	0.673327	0.72579	0.251754	0.340847	0.772261
SCGLU4	0.0261686	1.85865e-08	9.57894e-09	FALSE	0.0836003	0.115919	1.38658	4.34387e-05	0.7746	0.621091	0.597497	0.3238	0.000300557	0.0113075	0.021408	0.86465	0.772966	0.593601	0.137138	0.00478648	0.0890685	0.937006	0.0302789	0.222361	0.839571	0.0292352	0.0245597	0.00591797	0.343527	0.0100894	0.589775	0.148937	0.485223	0.249706	0.851774	0.937125	0.261939	0.283253	0.0318952	0.0221768	0.18978	0.165566	0.991208	0.0223869	0.288766	0.107691
SCGLU10	0.0626434	8.53684e-09	5.56888e-09	FALSE	0.0484602	0.0650109	1.34153	4.18688e-07	0.49662	0.538294	0.547916	0.484663	0.0259231	0.0772796	0.391731	0.840463	0.624126	0.720392	0.139369	0.136063	0.331601	0.671047	0.10514	0.968478	0.283248	0.27167	0.434104	0.389864	0.93396	0.153174	0.38796	0.0467881	0.493412	0.166649	0.0163639	0.132264	0.182143	0.615854	0.0341351	0.127238	0.0937171	0.211544	0.366321	0.146029	0.577968	0.0835671
HBCHO3	0.00326983	1.91584e-08	7.04503e-09	FALSE	0.191777	0.243508	1.26975	1.97177e-11	0.174126	0.0567301	0.570462	0.167902	6.03444e-05	0.421218	0.611993	0.748699	0.876723	0.29625	0.907937	0.0796814	0.0869587	0.432751	0.0853858	0.967727	0.857152	0.262925	0.0277138	0.751889	0.941299	0.712574	0.649203	0.233167	0.496332	0.403086	0.0433996	0.720275	0.328905	0.0346678	0.385783	0.781359	0.378349	0.390169	0.537429	0.11631	0.860437	0.213662
DEINH7	0.0258983	1.85083e-08	9.51674e-09	FALSE	0.038092	0.0535181	1.40497	0.00034839	0.721444	0.424067	0.901198	0.753902	0.00496572	0.0470375	0.724214	0.251161	0.502885	0.883524	0.954209	0.100145	0.671042	0.341939	0.365414	0.546552	0.694047	0.134239	0.395914	0.731801	0.619692	0.979763	0.719561	0.648432	0.514724	0.759392	0.266988	0.417419	0.173305	0.117498	0.651887	0.53561	0.39472	0.417873	0.757194	0.0835208	0.191398	0.452881
EPEN	0.886603	-4.8156e-09	3.98425e-09	FALSE	0.213021	0.245949	1.15457	0.000219371	0.272668	0.427879	0.491018	0.966237	0.993695	0.345468	0.164689	0.0402788	0.923617	0.997019	0.115437	0.72544	0.736226	0.553051	0.260247	0.393152	0.481806	0.589976	0.999299	0.0866333	0.110592	0.42769	0.794508	0.959166	0.518981	0.999245	0.254807	0.609577	0.933076	0.912605	0.481486	0.0961771	0.414549	0.534913	0.238777	0.822186	0.496653	0.990217
EPMB	0.997962	-1.13097e-08	3.93759e-09	FALSE	0.0709665	0.0761586	1.07316	0.16017	0.156684	0.502868	0.407172	0.991149	0.984831	0.28226	0.60844	0.125401	0.859997	0.993167	0.368734	0.529083	0.719531	0.379694	0.85537	0.380568	0.834281	0.921977	0.994693	0.275046	0.900005	0.176427	0.0666687	0.997559	0.520951	0.99165	0.229037	0.722823	0.83425	0.995593	0.414695	0.123733	0.400781	0.986439	0.763498	0.437055	0.0466979	0.968528
MEGLU14	0.00970269	1.40756e-08	6.02126e-09	FALSE	0.0885496	0.11802	1.33282	3.48813e-09	0.197876	0.103988	0.924971	0.455219	0.0536281	0.268633	0.303857	0.376908	0.484142	0.00696766	0.777315	0.0252667	0.137901	0.272254	0.42567	0.317408	0.206453	0.00338841	0.00927074	0.164695	0.0381732	0.286854	0.196467	0.0154856	0.530925	0.00224238	0.32636	0.171823	0.271666	0.110929	0.0320957	0.726072	0.53276	0.153006	0.188065	0.0606022	0.432573	0.00208461
SCGLU1	0.0143539	1.59615e-08	7.29677e-09	FALSE	0.0441683	0.0610635	1.38252	2.0126e-07	0.936709	0.218737	0.380878	0.773718	0.0181933	0.874283	0.491523	0.297445	0.585818	0.744878	0.490147	0.101959	0.851546	0.857313	0.127346	0.130457	0.352643	0.0443396	0.0623422	0.970931	0.994325	0.813736	0.535596	0.225379	0.536294	0.689262	0.247778	0.312177	0.197741	0.648284	0.35869	0.481203	0.569503	0.167757	0.437504	0.103256	0.247058	0.111784
DGGRC1	0.00276083	1.25981e-08	4.54e-09	FALSE	0.126926	0.168988	1.33139	3.42797e-10	0.193111	0.0839939	0.0621702	0.063371	1.68796e-07	0.0226159	0.0623298	0.524358	0.698175	0.0229456	0.454797	5.66094e-07	0.0992847	0.617914	0.216458	0.916879	0.741275	0.00570962	2.60788e-05	0.197209	0.726911	0.0731876	0.411626	0.00118893	0.539457	0.000691982	0.353917	0.858792	0.0154957	0.00108658	0.0984678	0.164215	0.487025	0.907399	0.750594	0.231104	0.960681	7.70319e-05
ENT5	0.249816	3.48466e-09	5.16193e-09	FALSE	0.124782	0.15675	1.25619	1.64804e-06	0.251815	0.616593	0.325439	0.437015	0.0432759	0.68133	0.626006	0.28033	0.433651	0.991507	0.451311	0.491802	0.662173	0.208883	0.913389	0.114854	0.206497	0.406358	0.125803	0.707864	0.596922	0.229141	0.0919557	0.528436	0.541632	0.859265	0.485891	0.267901	0.939717	0.0444871	0.833666	0.382088	0.255932	0.274757	0.377476	0.82317	0.662712	0.494114
HBADR	0.0162565	1.08445e-08	5.07213e-09	FALSE	0.107349	0.135843	1.26544	1.52181e-09	0.815415	0.17168	0.191006	0.526876	0.0115827	0.283776	0.87358	0.636931	0.676536	0.0435387	0.804166	0.0153273	0.393787	0.554542	0.240857	0.821914	0.778757	0.0261886	0.0045008	0.265591	0.533853	0.57592	0.112964	0.0167169	0.556251	0.253856	0.194456	0.555771	0.612069	0.321149	0.123328	0.877875	0.662497	0.0623496	0.869025	0.684935	0.886118	0.101713
CBINH2	0.0860432	9.47623e-09	6.93959e-09	FALSE	0.0481228	0.0642519	1.33516	9.33528e-05	0.273808	0.896125	0.208519	0.816711	0.33407	0.682329	0.824397	0.664684	0.92852	0.0406737	0.921002	0.0296498	0.771173	0.737162	0.280936	0.566283	0.263201	0.0412022	0.0313918	0.597544	0.318948	0.55945	0.0827322	0.0170424	0.558148	0.00951145	0.391231	0.434042	0.36405	0.0160955	0.393499	0.983654	0.441539	0.480752	0.334994	0.585781	0.986749	0.0340205
MOL1	0.543641	-4.58123e-10	4.17951e-09	FALSE	0.113335	0.138539	1.22239	0.000113221	0.368701	0.990331	0.483414	0.728605	0.832216	0.796445	0.95158	0.939257	0.353303	0.932716	0.918011	0.210578	0.569367	0.722566	0.933214	0.683696	0.35929	0.302878	0.953336	0.654953	0.434809	0.392999	0.632639	0.478103	0.559957	0.822469	0.316942	0.304902	0.885413	0.0773527	0.780315	0.880601	0.923345	0.508507	0.528754	0.176039	0.13454	0.498936
HYPEN	0.99202	-9.15659e-09	3.79966e-09	FALSE	0.0900908	0.0986015	1.09447	0.0703595	0.248982	0.315215	0.74402	0.986611	0.998594	0.354898	0.412456	0.484588	0.998903	0.998966	0.460005	0.504439	0.891693	0.773249	0.682344	0.92271	0.995932	0.862371	0.998088	0.409762	0.663815	0.195726	0.162482	0.995226	0.561321	0.984256	0.319202	0.52598	0.623182	0.999087	0.340172	0.667166	0.131976	0.977839	0.962366	0.72725	0.318486	0.9891
ABC	0.997691	-1.14993e-08	4.05965e-09	FALSE	0.103386	0.113106	1.09402	0.0579904	0.208123	0.836745	0.969769	0.660106	0.999933	0.271442	0.512294	0.436016	0.653152	0.999897	0.179049	0.999975	0.367862	0.459888	0.506772	2.43992e-05	0.608142	0.89032	0.999999	0.336952	0.332561	0.0524062	0.701278	0.999976	0.561822	0.999983	0.191847	0.982695	0.963096	0.999992	0.871298	0.114487	0.0386474	0.891416	0.208592	0.195439	0.00613493	0.99985
ACTE1	0.940869	-5.79858e-09	3.71202e-09	FALSE	0.108276	0.126523	1.16852	0.000498811	0.148748	0.927818	0.449958	0.976138	0.956618	0.844162	0.97771	0.823465	0.860367	0.95036	0.864504	0.645121	0.732453	0.901742	0.566227	0.368403	0.908334	0.72139	0.604118	0.0391942	0.202482	0.202177	0.830099	0.74387	0.573211	0.974271	0.563665	0.981128	0.946868	0.852054	0.926434	0.854758	0.596943	0.544208	0.568203	0.461198	0.196738	0.8459
TECHO	0.001689	1.73828e-08	5.93052e-09	FALSE	0.11401	0.148364	1.30133	2.32795e-10	0.320307	0.638394	0.0939437	0.0456917	0.0117422	0.813449	0.482592	0.647085	0.97341	0.00225706	0.93368	0.0017649	0.1672	0.991074	0.13811	0.856179	0.852076	0.000620393	0.0147465	0.953812	0.572616	0.676296	0.269697	0.0244056	0.577284	0.0417844	0.473692	0.214719	0.125485	0.0910128	0.700031	0.988675	0.157019	0.453203	0.383041	0.485076	0.997996	0.096983
HYPEP4	0.10694	8.03682e-09	6.46584e-09	FALSE	0.0584165	0.0744878	1.27512	1.958e-05	0.186681	0.224346	0.269689	0.0708195	0.411078	0.522019	0.322064	0.214067	0.157073	0.159922	0.902973	0.380842	0.283943	0.549356	0.328251	0.450359	0.132175	0.0217195	0.441805	0.751413	0.923369	0.337547	0.346254	0.123389	0.578288	0.0168672	0.367463	0.176223	0.0884068	0.29064	0.214634	0.874224	0.337302	0.109798	0.169403	0.00829122	0.0829345	0.0275878
TEINH17	0.00283508	1.66346e-08	6.01338e-09	FALSE	0.147324	0.195307	1.32569	1.26533e-09	0.174976	0.281297	0.341468	0.0828512	1.43171e-05	0.271255	0.458094	0.809847	0.695154	0.0025166	0.770555	2.3968e-06	0.416038	0.926211	0.0408377	0.575161	0.283377	0.00509574	6.77976e-05	0.37385	0.265151	0.145477	0.365176	0.00450712	0.583038	0.00011534	0.0291178	0.297455	0.197414	3.0517e-05	0.158198	0.813261	0.0189288	0.803939	0.219655	0.220458	0.978265	1.0212e-07
OBNBL2	0.0020336	1.60177e-08	5.57545e-09	FALSE	0.0818422	0.11328	1.38413	3.92613e-09	0.30164	0.0647637	0.105993	0.227221	1.0685e-05	0.0461277	0.0288044	0.725826	0.0675593	0.776253	0.247743	0.0191573	0.463187	0.402096	0.574885	0.286422	0.0395229	0.00297234	0.00136227	0.063257	0.732539	0.536479	0.0452345	0.176137	0.589996	0.63076	0.256796	0.043955	0.149258	0.0218639	0.618428	0.314725	0.0371896	0.244672	0.0877577	0.167535	0.577796	0.522794
DEINH8	0.108778	9.37766e-09	7.60525e-09	FALSE	0.038509	0.0503935	1.30862	0.000548869	0.677686	0.0251046	0.640058	0.525659	0.00197955	0.14639	0.870097	0.375398	0.293682	0.747201	0.766699	0.0713164	0.264758	0.70659	0.796307	0.46848	0.47947	0.558377	0.328827	0.517113	0.84095	0.716223	0.65046	0.819798	0.604462	0.696103	0.40491	0.0772825	0.332798	0.547135	0.60471	0.669721	0.224123	0.295987	0.614912	0.16549	0.203772	0.0488129
SCINH11	0.101045	8.36756e-09	6.55961e-09	FALSE	0.0505106	0.068244	1.35108	3.76065e-06	0.956371	0.0503538	0.789511	0.296433	0.261075	0.191108	0.252413	0.601641	0.413297	0.938908	0.240922	0.901873	0.159949	0.431885	0.692678	0.822254	0.197481	0.60393	0.741609	0.965647	0.523523	0.705384	0.132982	0.925056	0.614582	0.942138	0.784266	0.390384	0.24872	0.935385	0.765912	0.140442	0.148303	0.104376	0.342705	0.438879	0.483664	0.903535
HBGLU8	0.0447996	9.87474e-09	5.81717e-09	FALSE	0.115314	0.146604	1.27135	3.7459e-08	0.156102	0.428358	0.628922	0.640558	0.442241	0.432266	0.398185	0.989609	0.9406	0.841861	0.911295	0.133041	0.723038	0.993227	0.118922	0.999785	0.800841	0.233871	0.0343858	0.485763	0.532683	0.737137	0.53195	0.701988	0.623697	0.117666	0.0792679	0.373994	0.184677	0.00287441	0.870873	0.679958	0.245626	0.389661	0.605962	0.520793	0.897125	0.0407846
SCGLU5	0.322682	2.29286e-09	4.98219e-09	FALSE	0.0810802	0.0994766	1.22689	1.72693e-05	0.845742	0.272662	0.853723	0.600387	0.00145982	0.397598	0.238879	0.678017	0.71431	0.883633	0.603214	0.104729	0.161672	0.970732	0.0603913	0.70013	0.856463	0.0225173	0.211979	0.184287	0.989342	0.239134	0.912179	0.0696715	0.64659	0.706952	0.857058	0.359382	0.376983	0.619886	0.398509	0.293755	0.842524	0.681641	0.928848	0.342852	0.550988	0.488476
DETPH	0.94076	-9.18489e-09	5.88329e-09	FALSE	0.0354012	0.0418477	1.1821	0.015867	0.207212	0.973937	0.172421	0.439929	0.231959	0.0244871	0.0757439	0.321895	0.401226	0.993347	0.0823119	0.118364	0.250506	0.479179	0.41986	0.822424	0.853503	0.317895	0.0552443	0.210293	0.0805197	0.0836721	0.516263	0.953314	0.647719	0.692624	0.212212	0.5373	0.951436	0.272553	0.529986	0.337039	0.100094	0.920912	0.997553	0.522903	0.128903	0.608868
SCGLU9	0.101804	7.55241e-09	5.94052e-09	FALSE	0.0551313	0.0732077	1.32788	1.33015e-05	0.832739	0.4726	0.738842	0.15527	0.0285105	0.120228	0.61758	0.8153	0.544935	0.923849	0.626361	0.316273	0.216218	0.839225	0.145493	0.661295	0.502679	0.164752	0.141326	0.781969	0.953982	0.389888	0.576747	0.167419	0.661272	0.719318	0.67833	0.825494	0.0253265	0.529027	0.408296	0.647634	0.0123458	0.218295	0.844339	0.361552	0.468522	0.612241
OBDOP2	0.626835	-1.90914e-09	5.90181e-09	FALSE	0.0652015	0.0777684	1.19274	0.00722367	0.198821	0.693733	0.620674	0.0785904	0.000978869	0.084531	0.571773	0.638223	0.651727	0.242663	0.821859	0.000598232	0.195317	0.942753	0.840357	0.961958	0.665846	0.0167996	0.0102485	0.955938	0.557155	0.858231	0.0365106	0.532943	0.662336	0.305904	0.969582	0.230477	0.474889	0.015152	0.283287	0.65082	0.473709	0.0967584	0.699177	0.269398	0.610518	0.185701
SCGLU6	0.0430117	9.00464e-09	5.24514e-09	FALSE	0.0621788	0.0803007	1.29145	4.57231e-06	0.857628	0.493883	0.859151	0.117155	0.0243777	0.227674	0.253216	0.519971	0.964985	0.594772	0.156336	0.0277709	0.29564	0.988055	0.196853	0.344295	0.880824	0.150392	0.00306123	0.594622	0.893479	0.806919	0.793874	0.118522	0.666725	0.83394	0.747776	0.514353	0.00354259	0.53184	0.540502	0.0424894	0.307669	0.383305	0.965253	0.411526	0.597961	0.711482
MEINH8	0.0333875	1.43402e-08	7.82254e-09	FALSE	0.0619003	0.0836733	1.35174	1.26127e-05	0.90492	0.0526337	0.248913	0.0321911	0.0626709	0.452566	0.915668	0.576096	0.995995	0.0172418	0.767081	0.015818	0.824853	0.59723	0.240026	0.952797	0.985737	0.436507	0.0207816	0.545933	0.253863	0.102851	0.704999	0.237263	0.6859	0.137853	0.592856	0.2414	0.103828	0.0392749	0.476278	0.926301	0.376894	0.0364947	0.721675	0.766924	0.999448	0.344266
HYPEP5	0.0232384	1.23079e-08	6.18164e-09	FALSE	0.0699594	0.0924246	1.32112	1.24109e-06	0.810388	0.434312	0.0247643	0.915696	0.151131	0.451418	0.345006	0.105589	0.509349	0.216678	0.645246	0.20015	0.0417792	0.38813	0.0936524	0.141502	0.395809	0.108603	0.212726	0.836476	0.924411	0.169267	0.548483	0.35317	0.693714	0.157757	0.394643	0.348635	0.0776638	0.197326	0.18907	0.605676	0.0321591	0.082994	0.613455	0.100185	0.629589	0.0589088
SEPNBL	0.0128662	1.51922e-08	6.81194e-09	FALSE	0.0476966	0.0675803	1.41688	3.87015e-08	0.240597	0.555985	0.296288	0.0587438	0.0979269	0.21575	0.315186	0.71507	0.777163	0.151226	0.761715	0.0670013	0.999452	0.948525	0.154413	0.993954	0.616663	0.0246993	0.26835	0.97982	0.886337	0.970149	0.297533	0.162666	0.70561	0.0708894	0.735338	0.947406	0.0352221	0.0254286	0.0676615	0.675224	0.103227	0.886144	0.640502	0.085719	0.639306	0.218928
ENT1	0.0720003	1.74533e-08	1.19457e-08	FALSE	0.0801189	0.107872	1.3464	0.000534011	0.923472	0.49275	0.603917	0.600385	0.0160209	0.0806729	0.0872275	0.404399	0.587906	0.85973	0.0508761	0.83737	0.850512	0.416283	0.900298	0.968161	0.198183	0.67337	0.904686	0.683693	0.956473	0.755283	0.0809958	0.653187	0.709704	0.914518	0.976492	0.707784	0.498229	0.461963	0.664103	0.0492952	0.961728	0.0819713	0.556636	0.495266	0.971302	0.76345
CBNBL1	0.0663725	9.64766e-09	6.41738e-09	FALSE	0.0549283	0.0717183	1.30567	0.000207162	0.312251	0.81025	0.0589406	0.38617	0.106252	0.151265	0.628044	0.198639	0.291823	0.00754169	0.64922	0.0245245	0.846825	0.951974	0.569327	0.980815	0.202581	0.550521	0.0164754	0.847654	0.772493	0.310159	0.669153	0.141781	0.710607	0.000816587	0.718264	0.264956	0.0988056	0.00213797	0.328022	0.762636	0.0425155	0.291319	0.83145	0.406108	0.834605	0.0735314
VSMCA	0.935224	-6.33734e-09	4.18066e-09	FALSE	0.0971417	0.113496	1.16836	0.00213137	0.200025	0.999171	0.394003	0.85682	0.994772	0.115581	0.00387756	0.136068	0.532124	0.999998	1.21579e-06	0.992719	0.320719	0.276082	0.318755	0.00148847	0.182858	0.898419	0.999987	0.16251	0.205802	0.0845951	0.198351	0.998614	0.735005	0.999935	0.873621	0.955793	0.993394	0.999944	0.9906	0.000510934	0.640575	0.931351	0.160247	0.594748	0.00684812	1
HBNOR	0.000629806	2.85478e-08	8.85197e-09	FALSE	0.0824805	0.118925	1.44186	6.14737e-08	0.0278577	0.175568	0.184436	0.373488	0.00410358	0.198548	0.908996	0.621747	0.592567	0.406183	0.824821	0.123741	0.0575783	0.317689	0.725893	0.977239	0.733806	0.0201403	0.0539823	0.776932	0.253774	0.0534145	0.210394	0.177962	0.738251	0.521944	0.649714	0.282098	0.0510382	0.0845382	0.728625	0.636702	0.00770057	0.260147	0.750733	0.0377057	0.751299	0.528998
HYPEP2	0.0429835	1.00058e-08	5.82724e-09	FALSE	0.0557129	0.071205	1.27807	5.39364e-06	0.849507	0.139326	0.658908	0.0600671	0.478689	0.0690356	0.778357	0.732054	0.781601	0.0742219	0.879623	0.00577034	0.11669	0.275413	0.409323	0.552064	0.862111	0.051026	0.11119	0.713969	0.991641	0.414197	0.627473	0.0234774	0.762678	0.0216343	0.884331	0.0690415	0.02743	0.4191	0.0608244	0.768102	0.249424	0.340613	0.702782	0.818648	0.866539	0.0136972
OBINH1	0.119972	7.18743e-09	6.1163e-09	FALSE	0.0722797	0.0932654	1.29034	8.81688e-05	0.0821495	0.715648	0.182654	0.435456	0.00012361	0.848859	0.520207	0.779161	0.812747	0.017231	0.935211	1.46981e-05	0.132472	0.489	0.447874	0.914076	0.844631	0.0055003	9.37878e-06	0.243521	0.669268	0.287662	0.273369	0.25038	0.764374	0.0641657	0.552484	0.27422	0.680422	0.000147948	0.0574487	0.865231	0.200251	0.16551	0.756861	0.0228094	0.26326	0.09965
MEINH10	0.0154603	1.10577e-08	5.12383e-09	FALSE	0.172756	0.217964	1.26168	1.55601e-10	0.785552	0.647041	0.173318	0.0334199	0.00021012	0.566183	0.252855	0.469991	0.900291	0.00448161	0.87063	0.00400804	0.805545	0.816422	0.54183	0.995874	0.817094	0.0282814	6.64845e-06	0.576663	0.0424828	0.182244	0.20185	0.000393636	0.767665	0.00244837	0.0748784	0.495874	0.00474223	0.0278499	0.106639	0.668852	0.0932827	0.318814	0.511941	0.834972	0.9997	0.00198225
DEINH4	0.00567239	1.36591e-08	5.39483e-09	FALSE	0.0800122	0.103773	1.29696	5.26759e-09	0.208571	0.110496	0.441099	0.0306178	0.00134887	0.121633	0.727341	0.680188	0.902918	0.0268614	0.980354	2.60083e-05	0.334119	0.696836	0.841869	0.963	0.828144	0.0009462	3.68101e-06	0.154011	0.473095	0.174067	0.20161	0.0368554	0.770564	0.000525987	0.243199	0.501107	0.228847	0.0222817	0.0434888	0.886563	0.459089	0.292535	0.910738	0.318106	0.977977	0.000227378
MOL2	0.611567	-1.04578e-09	3.69008e-09	FALSE	0.134528	0.160387	1.19222	6.54779e-05	0.385203	0.953647	0.675413	0.904693	0.726382	0.778903	0.784172	0.986697	0.183155	0.908351	0.890231	0.327915	0.394812	0.303015	0.464719	0.558766	0.262492	0.385302	0.850894	0.820576	0.260532	0.643139	0.744901	0.557102	0.774651	0.964387	0.176519	0.17036	0.993786	0.252697	0.814888	0.924987	0.966691	0.215875	0.637905	0.326767	0.317481	0.727357
HBINH3	0.000364159	2.35364e-08	6.96612e-09	FALSE	0.0899986	0.126553	1.40617	7.09885e-10	0.102254	0.789432	0.576299	0.107734	0.00307062	0.253315	0.221249	0.221073	0.86101	0.00620898	0.202275	0.0119155	0.445582	0.0287929	0.0769339	0.898717	0.904961	0.208535	0.000593684	0.399436	0.781623	0.176778	0.132589	0.0676345	0.804439	0.0267413	0.480032	0.0629868	0.0161766	0.144476	0.133044	0.145201	0.0113658	0.100558	0.910573	0.01007	0.846938	0.0874222
SCGLU7	0.117559	9.38927e-09	7.90824e-09	FALSE	0.0404648	0.0552876	1.36631	0.000215343	0.477294	0.17287	0.480946	0.125121	0.0898302	0.114288	0.318617	0.916061	0.109953	0.31047	0.821249	0.0638172	0.146741	0.437423	0.0926189	0.916322	0.0779895	0.391567	0.226136	0.792258	0.459828	0.176066	0.374445	0.389107	0.817178	0.662981	0.798995	0.343008	0.137732	0.316184	0.348987	0.470224	0.120675	0.830625	0.205089	0.360158	0.925665	0.49588
MFOL2	0.597107	-1.0298e-09	4.18847e-09	FALSE	0.131882	0.160749	1.21889	7.28818e-05	0.786773	0.885671	0.461237	0.7989	0.936651	0.678291	0.8888	0.714977	0.250827	0.947682	0.727871	0.0895844	0.371649	0.214141	0.742289	0.938978	0.232822	0.0296513	0.49613	0.578173	0.481058	0.305713	0.808982	0.597989	0.820697	0.890251	0.261189	0.0963097	0.95202	0.0880172	0.574847	0.899356	0.890206	0.758667	0.452561	0.614204	0.374394	0.568742
HBGLU3	0.000224919	2.28904e-08	6.52339e-09	FALSE	0.126656	0.168996	1.33429	1.16327e-10	0.62158	0.0894796	0.0866682	0.3009	3.01396e-06	0.69895	0.0368138	0.550759	0.318554	0.00797548	0.10895	0.00266696	0.0600022	0.48738	0.298994	0.655442	0.58509	0.00421194	0.000163471	0.505854	0.617499	0.247904	0.0833487	0.00282718	0.841415	0.0111083	0.360627	0.0748677	0.00245372	0.00431719	0.0668029	0.0407164	0.336402	0.0950244	0.939959	0.0639462	0.700141	0.015958
NFOL2	0.396719	1.05628e-09	4.03393e-09	FALSE	0.109177	0.13294	1.21766	2.65965e-05	0.725058	0.365727	0.732761	0.585179	0.660795	0.912892	0.929079	0.564412	0.528575	0.881085	0.929715	0.12094	0.401441	0.531856	0.561852	0.931995	0.172749	0.0806499	0.159073	0.746156	0.455155	0.978958	0.565849	0.279458	0.850007	0.814042	0.341374	0.0207519	0.37743	0.0238946	0.902403	0.849294	0.859111	0.0900865	0.528342	0.508084	0.422029	0.261546
OBINH4	0.0662506	7.89749e-09	5.2499e-09	FALSE	0.0703998	0.0897233	1.27448	3.89414e-05	0.732072	0.932434	0.0600159	0.133397	0.388116	0.671897	0.617481	0.89663	0.446212	0.0935653	0.808764	0.000713003	0.588048	0.332955	0.532631	0.763535	0.338952	0.0465068	0.00813879	0.992559	0.293412	0.904027	0.431479	0.274197	0.874575	0.0275348	0.941423	0.343318	0.557114	0.0345251	0.271011	0.562778	0.827983	0.321286	0.173669	0.0802339	0.20693	0.0783692
OBINH3	0.183737	4.57127e-09	5.07233e-09	FALSE	0.085632	0.108088	1.26224	4.503e-05	0.676466	0.958536	0.0339668	0.434887	0.000349854	0.571336	0.205643	0.961754	0.648044	0.0220818	0.888651	9.95008e-06	0.180909	0.744963	0.825337	0.47944	0.426285	0.0473052	4.03544e-05	0.17613	0.612073	0.297852	0.138495	0.196551	0.888065	0.120781	0.919863	0.0932135	0.877743	0.001019	0.0695493	0.954255	0.181798	0.121762	0.430787	0.318198	0.694726	0.137044
MFOL1	0.60484	-9.33382e-10	3.51033e-09	FALSE	0.161607	0.192155	1.18903	3.42148e-05	0.532598	0.904422	0.38437	0.787837	0.931375	0.470681	0.877299	0.767687	0.318759	0.86048	0.890734	0.258973	0.653511	0.416194	0.107203	0.637168	0.398443	0.0229727	0.645491	0.765924	0.222027	0.787451	0.503468	0.399455	0.891557	0.896012	0.417164	0.461767	0.961391	0.0562783	0.648922	0.88474	0.983182	0.22918	0.724782	0.231705	0.200058	0.569062
CBNBL2	0.414511	1.16789e-09	5.40801e-09	FALSE	0.0476159	0.0606217	1.27314	3.26435e-05	0.877987	0.145511	0.261063	0.231234	0.557018	0.934845	0.258553	0.882833	0.474056	0.120616	0.272389	0.00903977	0.82614	0.612688	0.830523	0.971571	0.705207	0.0460748	0.0188796	0.841085	0.713669	0.68727	0.824803	0.0935618	0.895435	0.0522177	0.886461	0.442349	0.00535835	0.097429	0.0062893	0.397453	0.503307	0.981899	0.962704	0.743224	0.991772	0.122449
COP2	0.741921	-2.65328e-09	4.08651e-09	FALSE	0.10676	0.125443	1.175	0.0006879	0.121961	0.84231	0.522118	0.923364	0.600648	0.840589	0.622171	0.557752	0.633835	0.96648	0.469935	0.560091	0.361592	0.460855	0.162917	0.893979	0.466231	0.67085	0.809331	0.406073	0.572135	0.862459	0.961661	0.846054	0.923752	0.906381	0.712533	0.380745	0.520157	0.134094	0.904725	0.359347	0.559479	0.19687	0.729542	0.257083	0.239371	0.51587
OBNBL3	0.658225	-2.62578e-09	6.44167e-09	FALSE	0.0821919	0.0993918	1.20927	0.00417449	0.443611	0.255824	0.58113	0.177955	0.0436219	0.580074	0.789073	0.879916	0.461968	0.597404	0.528034	0.548218	0.946678	0.863774	0.710122	0.453211	0.341225	0.649377	0.48282	0.824476	0.279753	0.828447	0.329672	0.574724	0.931452	0.537721	0.908094	0.566795	0.446117	0.0625749	0.208599	0.523488	0.507204	0.574263	0.547275	0.845937	0.682763	0.665101
MOL3	0.88974	-4.52175e-09	3.69079e-09	FALSE	0.126061	0.148371	1.17698	0.000439853	0.838019	0.980198	0.573155	0.674335	0.686146	0.905251	0.992606	0.958277	0.486929	0.96131	0.980735	0.862741	0.359492	0.448982	0.200875	0.728361	0.253751	0.743251	0.980649	0.573015	0.360688	0.433123	0.492472	0.948575	0.93574	0.983248	0.337941	0.241116	0.999335	0.552571	0.494713	0.988408	0.963711	0.730363	0.527024	0.396853	0.12224	0.883054
COP1	0.94155	-6.31995e-09	4.0308e-09	FALSE	0.122408	0.13978	1.14192	0.00379496	0.624117	0.718336	0.336036	0.408482	0.810975	0.918958	0.913046	0.755565	0.777271	0.971213	0.948414	0.650855	0.565891	0.65698	0.183848	0.954183	0.372872	0.480246	0.978123	0.37848	0.758579	0.947728	0.972742	0.931654	0.942297	0.903428	0.726106	0.407048	0.574392	0.307595	0.635951	0.938341	0.882967	0.360993	0.720742	0.187999	0.122261	0.727582
OBNBL5	0.147511	6.04832e-09	5.77589e-09	FALSE	0.0647765	0.0837163	1.29239	8.78085e-05	0.105653	0.511331	0.279627	0.471654	0.163263	0.141573	0.0195248	0.533593	0.856722	0.0385151	0.0282588	0.00552055	0.788601	0.449431	0.546609	0.347628	0.680093	0.241882	0.0923859	0.219831	0.0770152	0.232203	0.0402685	0.101937	0.965419	0.0216527	0.819046	0.516903	0.246036	0.0412929	0.522735	0.0352615	0.214958	0.163556	0.823346	0.298722	0.891132	0.0157245
HBINH1	0.145172	6.70723e-09	6.34333e-09	FALSE	0.0508471	0.0634011	1.2469	0.00116217	0.384882	0.153284	0.681664	0.348144	0.580121	0.663064	0.301268	0.578628	0.992453	0.0266035	0.19929	0.0461269	0.138957	0.98208	0.0524359	0.0736908	0.979263	0.981306	0.0372569	0.58562	0.975714	0.603213	0.89848	0.0183967	0.982574	0.00217925	0.965284	0.940376	0.549371	0.395754	0.0981597	0.215148	0.551112	0.920626	0.836417	0.773132	0.729275	0.114795

## Sheet: 6 - ESmu MNS BMI cell-types
gene	gene_name	DEGLU4	DEGLU5	DEINH3	HBGLU2	HBGLU5	HBINH8	HBSER5	MEGLU1	MEGLU10	MEGLU11	MEGLU2	MEGLU3	MEGLU7	MEINH2	MEINH3	TEGLU17	TEGLU19	TEGLU21	TEGLU23	TEGLU4	TEINH1	TEINH12
ENSG00000124827	GCM2	0.999353	0	0	0	0	0	0	0	0	0	0	0	0	0	0	0	0	0	0	0	0	0
ENSG00000113722	CDX1	0.995391	0	0	0	0	0	0	0	0	0	0	0	0	0.918547	0	0	0	0	0	0	0	0
ENSG00000120457	KCNJ5	0.993131	0.984839	0.723571	0	0	0	0	0.868299	0	0	0.840226	0.895859	0	0.122014	0	0	0	0	0	0	0.779906	0
ENSG00000146904	EPHA1	0.99226	0.482957	0	0	0.00624422	0	0	0	0	0	0	0	0	0	0	0.155365	0	0	0	0	0	0
ENSG00000163251	FZD5	0.990896	0	0	0	0	0	0	0	0	0	0	0	0	0	0	0	0	0	0	0	0	0.517057
ENSG00000117586	TNFSF4	0.989869	0	0	0	0	0	0	0	0	0	0	0	0	0	0	0	0	0	0	0	0	0
ENSG00000150556	LYPD6B	0.988153	0.393713	0.961396	0.238288	0	0.46067	0	0.93291	0.0117015	0.575283	0.906777	0.658244	0.0982823	0.865336	0.628441	0	0	0	0.140517	0.258828	0.924738	0.571546
ENSG00000158955	WNT9B	0.987977	0.721889	0	0	0.904308	0	0	0	0	0	0.0416667	0.313252	0	0.101261	0.577778	0.0390558	0	0	0.6564	0	0	0
ENSG00000205279	CTXN3	0.987538	0.944994	0.650593	0	0	0	0	0.0162602	0	0	0	0	0	0.0533613	0	0	0	0	0	0	0.189346	0
ENSG00000157890	MEGF11	0.987225	0.110045	0.664252	0.0563668	0.663902	0	0	0.792806	0.0268869	0	0.12735	0	0	0.875394	0.0553396	0.481208	0	0	0.581676	0	0.515195	0.961462
ENSG00000185155	MIXL1	0.984276	0	0	0	0	0	0	0	0	0	0	0	0	0	0.800808	0	0	0	0	0	0	0
ENSG00000054803	CBLN4	0.982132	0.384125	0.365942	0.766381	0.551383	0	0.309877	0.223253	0.459134	0	0.430612	0	0	0.362982	0.315774	0	0	0	0	0	0.296191	0
ENSG00000128573	FOXP2	0.977848	0.905045	0	0.00947636	0	0	0	0.811483	0.938322	0.955017	0.565829	0.932178	0.962267	0.858335	0	0	0	0	0	0	0	0
ENSG00000172403	SYNPO2	0.976415	0	0	0	0	0	0	0	0.148322	0	0	0	0	0	0	0	0	0	0	0	0	0
ENSG00000187123	LYPD6	0.975953	0	0.757966	0	0	0	0.28405	0.359123	0	0	0.714759	0.444111	0	0.0797584	0.16528	0	0	0	0.187092	0	0.916646	0.464331
ENSG00000162552	WNT4	0.974044	0	0	0	0	0	0	0	0	0	0	0	0	0	0	0.398729	0.822599	0.794879	0.652386	0.757551	0	0
ENSG00000174951	FUT1	0.973625	0	0	0	0	0	0	0	0	0	0	0	0	0	0	0	0	0	0.608132	0	0	0.670607
ENSG00000102924	CBLN1	0.971361	0	0	0.502961	0	0	0.10089	0.627368	0.341128	0.00804989	0	0	0	0	0	0	0	0.743192	0	0	0	0
ENSG00000041982	TNC	0.966473	0	0	0	0	0	0	0	0	0	0	0	0	0	0	0	0	0	0	0	0	0
ENSG00000070886	EPHA8	0.961775	0.909018	0.337147	0.113757	0	0	0	0.856494	0	0.3159	0.00508737	0.559304	0	0.320118	0.26944	0	0	0	0.278296	0.589332	0.18603	0
ENSG00000184682	NA	0.959582	0.741016	0.711643	0	0.708046	0	0	0	0	0	0	0	0	0.43241	0	0	0	0	0.865243	0	0	0
ENSG00000196542	SPTSSB	0.957892	0.782475	0.808092	0	0.900081	0	0	0.775589	0.0769231	0	0	0.65989	0.670646	0.8613	0.00654664	0	0	0	0.0568148	0.525997	0.216267	0
ENSG00000128422	KRT17	0.957304	0.527506	0	0	0	0	0.173312	0.404681	0.613345	0	0.874287	0.459619	0.37277	0	0.267155	0	0.562387	0.125866	0	0	0	0
ENSG00000148680	HTR7	0.956868	0.516178	0.930308	0.488179	0	0.112135	0	0.347512	0.330491	0.381611	0.390802	0.29621	0	0.832454	0.869123	0	0	0	0.213116	0.0534819	0.816417	0
ENSG00000233608	TWIST2	0.956048	0.598344	0	0	0	0	0	0.179868	0	0	0.878244	0.821077	0	0	0	0.913542	0	0.676633	0.981751	0	0	0
ENSG00000101327	PDYN	0.954027	0.153455	0	0.535915	0	0	0	0	0.120252	0	0	0	0	0	0	0.368114	0	0	0	0.478463	0.827751	0
ENSG00000168779	SHOX2	0.953448	0.985143	0	0.962326	0	0	0.965464	0.975751	0.992238	0.992125	0.988306	0.987054	0.863834	0.0764706	0.13806	0	0	0	0	0	0	0
ENSG00000143355	LHX9	0.953113	0.970696	0	0.235597	0	0	0	0.93176	0.994977	0.994013	0.985092	0.978744	0.993695	0	0	0	0	0	0.865221	0	0	0
ENSG00000120329	SLC25A2	0.946349	0	0.6186	0.755243	0	0	0	0	0	0.655835	0.849351	0	0	0	0	0	0	0	0.604916	0	0.652672	0.537361
ENSG00000117560	FASLG	0.944914	0.538511	0.576088	0	0.612613	0	0	0.586348	0	0	0	0.794599	0	0.147683	0.792065	0.0832811	0	0	0	0	0.13437	0
ENSG00000139292	LGR5	0.942998	0.0698819	0.466035	0.0752531	0	0	0	0.180775	0	0	0	0	0	0.849719	0.270427	0	0.036704	0	0	0.316651	0.247771	0
ENSG00000141314	RHBDL3	0.942952	0.352802	0.641528	0.543159	0.548397	0.365266	0	0.708204	0.397683	0.559071	0.493832	0.237384	0.834346	0.659699	0.61214	0.589438	0.366477	0.318947	0.300185	0.745363	0.585257	0
ENSG00000019186	CYP24A1	0.941691	0	0	0.811129	0	0	0	0.792225	0	0	0	0	0	0	0	0.660559	0	0.880309	0	0	0	0
ENSG00000141668	CBLN2	0.940268	0.902401	0.435422	0.517555	0	0	0.482111	0.457146	0.917361	0.689617	0.466365	0.476568	0.921174	0.267521	0.477976	0.400054	0	0	0	0.394258	0	0.363912
ENSG00000182601	HS3ST4	0.93912	0.526442	0.353931	0.310266	0.784925	0.38497	0.632142	0.433997	0.620457	0	0.680105	0.433414	0.773581	0.147197	0.304537	0.535059	0.258524	0.464046	0.882396	0	0	0
ENSG00000148737	TCF7L2	0.936677	0.980533	0.354109	0	0	0	0	0	0.982147	0.967062	0.936901	0	0.972427	0	0.971365	0	0	0	0	0	0	0
ENSG00000168952	STXBP6	0.936543	0.867391	0	0	0	0.473685	0	0.287336	0.494808	0.740824	0	0	0	0.437776	0.00130402	0	0	0	0	0.449085	0.714529	0
ENSG00000134215	VAV3	0.933789	0.325217	0.155231	0.140214	0	0	0.0256862	0.313465	0.515766	0.103326	0.114597	0	0	0.0341301	0	0	0	0	0	0	0	0
ENSG00000185056	C5orf47	0.933374	0	0	0	0.711629	0	0	0	0.498693	0.653982	0.620111	0	0	0.872411	0	0	0	0.776894	0.813427	0	0.644815	0
ENSG00000104941	RSPH6A	0.93254	0	0.27379	0	0	0	0	0.096218	0.601115	0.752731	0.767533	0	0.77069	0	0.893044	0	0	0.35995	0	0	0.0112862	0
ENSG00000197705	KLHL14	0.930288	0.404317	0.37395	0.0841121	0	0.950748	0	0	0	0	0.78755	0	0.293006	0.357178	0.649698	0.611737	0.976595	0	0	0	0	0
ENSG00000165621	OXGR1	0.9229	0.844518	0	0	0	0	0	0	0	0	0.902007	0	0	0.646718	0.945633	0	0	0	0.242873	0.53033	0	0
ENSG00000188991	SLC15A5	0.921379	0.794432	0.849229	0	0	0	0	0	0	0	0	0.978101	0	0	0	0	0	0	0	0	0.769394	0
ENSG00000171714	ANO5	0.91816	0	0.0703536	0.944188	0	0	0	0.173769	0.13136	0.0430839	0.690858	0.180887	0.938405	0.593328	0.664491	0	0	0	0	0.0266518	0	0
ENSG00000049130	KITLG	0.917547	0	0	0	0	0	0	0	0	0	0	0	0	0	0	0.686727	0.604947	0	0	0	0	0
ENSG00000122641	INHBA	0.914277	0	0	0	0	0	0	0	0	0	0	0	0	0	0	0	0.681467	0	0	0	0	0
ENSG00000102935	ZNF423	0.912933	0.453606	0.268061	0	0.249788	0	0.109545	0.447414	0	0	0.240685	0	0	0.32051	0.277875	0	0.0315448	0	0.102304	0	0	0
ENSG00000170293	CMTM8	0.908402	0	0	0	0	0	0	0	0	0	0	0	0	0	0	0	0	0	0	0	0	0
ENSG00000169676	DRD5	0.905564	0.950298	0.617384	0.0879576	0.530841	0	0	0.823825	0	0	0.918005	0.76075	0	0.951797	0.513963	0	0.139519	0	0.747004	0.649723	0.761949	0
ENSG00000108924	HLF	0.903469	0.198545	0.0569603	0	0.669832	0.0291356	0	0.188416	0.260957	0.551061	0	0	0.776628	0.275379	0	0	0.0133939	0.419461	0	0.5389	0	0
ENSG00000197991	AL592490	0.90037	0.079966	0.445422	0	0	0	0.567125	0	0	0	0.0473547	0	0	0.0269156	0.200339	0.587876	0	0	0.934527	0	0.385204	0.826087
ENSG00000152953	STK32B	0.899716	0.804485	0.343292	0.70203	0	0	0.819855	0.291349	0.979459	0.451264	0.594462	0	0	0.269717	0.377479	0	0	0	0	0	0.920056	0.988788
ENSG00000156966	B3GNT7	0.897655	0	0.26504	0	0.138237	0	0	0.254942	0	0	0.403604	0.704669	0	0	0	0	0	0.147403	0	0.00526652	0	0
ENSG00000124557	BTN1A1	0.89223	0.712019	0	0	0	0	0	0	0.745829	0	0.80611	0	0	0	0	0	0	0	0	0.531159	0.885879	0
ENSG00000125845	BMP2	0.888157	0.255675	0	0	0	0	0	0	0	0	0	0.835605	0	0.326969	0.231828	0	0	0.0761364	0	0	0.0196444	0
ENSG00000165555	NOXRED1	0.886115	0	0.0240476	0	0	0.943038	0	0	0	0	0.545307	0	0	0	0.342544	0.65023	0	0	0.542072	0	0	0.0692258
ENSG00000180269	GPR139	0.885579	0.493967	0.980568	0.730781	0	0	0.0306473	0.336784	0.249035	0	0.696897	0.830793	0	0.743237	0.840468	0	0	0	0	0	0.415824	0
ENSG00000188676	IDO2	0.884213	0.623489	0.704665	0.534037	0.0128131	0	0	0.790085	0.585907	0.268549	0.674828	0	0	0.204529	0	0.23306	0	0.0195346	0.00846335	0.389042	0.302081	0
ENSG00000184465	WDR27	0.883162	0.1704	0.0724058	0	0.279129	0	0	0.0796421	0.416096	0	0.0615461	0.666125	0	0.346635	0.278122	0	0	0	0.462784	0.676702	0	0
ENSG00000132911	NMUR2	0.883056	0.0346687	0.12453	0.815928	0.242386	0	0	0.0647617	0.0912545	0	0	0	0	0	0	0	0	0	0	0	0.100243	0
ENSG00000181234	TMEM132C	0.882435	0.78748	0	0.35438	0.323652	0	0.772462	0.361254	0.357397	0.426187	0.0316593	0	0	0.531281	0.0708439	0	0	0	0.158854	0	0	0
ENSG00000182575	NXPH3	0.881058	0.548939	0.090993	0.308223	0.70906	0.355881	0	0.193769	0	0	0	0	0	0	0.336141	0	0.0907476	0.193885	0	0.260148	0	0
ENSG00000085831	TTC39A	0.876125	0.726316	0.615618	0.669547	0.396941	0	0.54118	0.836232	0.389342	0.397221	0.263771	0.237342	0.594018	0.868717	0.782974	0	0	0	0	0	0.545452	0
ENSG00000135480	KRT7	0.872101	0	0	0.0817757	0	0	0.256143	0.0558137	0	0	0.0801261	0	0	0	0.5688	0	0	0	0	0.0507501	0.124414	0
ENSG00000169855	ROBO1	0.870264	0.201281	0.296193	0.61155	0	0	0.156733	0.489874	0.3267	0.318938	0.459347	0.506671	0	0.326929	0	0.0834886	0	0	0.802957	0.612159	0.443718	0.296417
ENSG00000144550	CPNE9	0.866071	0.907629	0.421774	0	0.926962	0.161893	0	0.615654	0	0.0294613	0	0.0238034	0.0644913	0.474765	0.0592104	0	0	0	0.547232	0	0	0
ENSG00000172987	HPSE2	0.864086	0	0	0	0	0	0	0	0	0	0	0	0	0	0	0	0	0	0	0	0	0
ENSG00000091664	SLC17A6	0.86339	0.944146	0	0.939951	0.479363	0	0	0.892608	0.869573	0.889501	0.836754	0.759432	0.817085	0	0	0	0	0	0	0	0	0
ENSG00000141431	ASXL3	0.861072	0.360575	0.192447	0.164032	0	0	0.294998	0.116347	0.188365	0.126689	0.31155	0	0	0	0.28051	0.306286	0.48067	0.131518	0	0.470706	0.26911	0
ENSG00000197191	CYSRT1	0.860853	0.160262	0	0	0.377627	0	0	0	0.744703	0	0.659503	0	0	0.393701	0	0.01089	0	0	0.74785	0.00857804	0	0
ENSG00000180611	MB21D2	0.859254	0.233357	0.235491	0.0736213	0.670897	0.0458358	0.0852499	0.0206574	0.00987915	0.274132	0.312949	0	0.0275401	0	0	0	0	0	0.106156	0.56252	0.389127	0
ENSG00000197181	PIWIL2	0.859155	0.494607	0	0	0.752453	0	0	0	0	0	0.0487724	0	0	0.234353	0	0.403269	0	0	0.0540183	0.132317	0.606041	0.333601
ENSG00000006747	SCIN	0.849903	0	0	0	0	0	0	0	0	0	0	0	0	0	0	0.285584	0	0	0	0	0.0900703	0
ENSG00000177519	RPRM	0.849816	0	0	0	0	0	0	0	0.401787	0	0.074549	0.0241874	0	0	0	0.917874	0	0.398337	0.287867	0	0	0
ENSG00000137573	SULF1	0.848501	0	0	0	0	0	0	0	0.153679	0	0	0	0	0	0	0.202335	0.747015	0	0.00901531	0	0	0
ENSG00000081138	CDH7	0.847928	0.65889	0.756533	0.632379	0.688624	0	0.0599036	0.480978	0.950979	0.692423	0.496437	0.353035	0.705592	0.327596	0.252529	0.414456	0	0	0	0.692396	0.383715	0
ENSG00000240891	PLCXD2	0.843467	0.416093	0.791401	0.709213	0.549743	0	0.207722	0.596818	0.672018	0.887531	0.381934	0.430347	0.576622	0.608921	0.447322	0.367809	0	0.398839	0.434731	0.405739	0.477002	0.224063
ENSG00000160716	CHRNB2	0.842401	0.532569	0.596464	0.417381	0.427522	0	0.438538	0.575872	0.352894	0.522482	0.435738	0.270704	0.284727	0.606149	0.461896	0.228983	0.0605169	0.303751	0.309641	0.423406	0.562709	0.463718
ENSG00000145685	LHFPL2	0.842149	0	0	0	0	0	0	0	0	0	0	0	0	0	0	0	0	0	0.0710561	0	0	0
ENSG00000162849	KIF26B	0.836259	0.45967	0.443065	0.312641	0.415573	0	0.455249	0.6314	0.554712	0.392309	0.403452	0.391035	0.692395	0.326961	0.432169	0	0	0.101727	0	0	0.30957	0
ENSG00000178342	KCNG2	0.835321	0	0.379642	0	0	0	0	0	0.153567	0.0579932	0.0893734	0.364367	0.232911	0.252188	0	0	0	0	0.905607	0.882004	0	0
ENSG00000115705	TPO	0.83418	0.234411	0	0.239918	0	0	0.770937	0.937261	0.4685	0.540197	0.557052	0	0	0.136907	0	0.145357	0	0	0	0.00889722	0.269744	0
ENSG00000139971	C14orf37	0.833356	0.288341	0.110164	0.372662	0.431445	0.392401	0.399482	0.246969	0	0.109081	0.00502631	0	0	0.310871	0.110373	0.0859247	0	0	0.441436	0.371918	0.194225	0.278533
ENSG00000111452	ADGRD1	0.832329	0	0	0	0	0	0	0	0	0	0	0	0	0	0	0.278973	0.205853	0.106331	0	0.552043	0	0
ENSG00000162614	NEXN	0.831277	0	0.100393	0	0	0.109888	0	0.197993	0	0.550613	0	0	0	0.171145	0	0	0	0	0	0	0	0
ENSG00000166396	SERPINB7	0.82985	0	0	0	0	0	0	0	0	0	0	0	0	0	0	0	0	0	0.335498	0	0	0
ENSG00000164093	PITX2	0.829675	0.943687	0	0	0	0	0	0.999865	0	0	0.518767	0	0	0.597149	0	0	0	0	0	0	0.429012	0
ENSG00000122584	NXPH1	0.827795	0.253045	0.133926	0.429666	0.159749	0.211685	0	0.0201069	0	0	0	0	0	0.531928	0.707165	0	0	0	0	0	0.190385	0
ENSG00000196482	ESRRG	0.826615	0.837153	0.935927	0.430354	0.892507	0.48386	0	0.384306	0	0.211602	0	0	0.702509	0.885691	0.697565	0	0	0	0	0.290073	0.838187	0
ENSG00000125207	PIWIL1	0.826492	0.754266	0	0.592636	0	0	0.894123	0	0	0	0.747907	0	0	0.155439	0	0.313295	0.554092	0	0	0.37948	0	0
ENSG00000174145	NWD2	0.82409	0	0.00634447	0.286526	0	0	0	0	0	0.199004	0	0	0	0	0.271147	0.891284	0.453783	0.566267	0.714773	0.379298	0.116966	0.149572
ENSG00000158825	CDA	0.823713	0.357121	0.34674	0.40741	0	0	0.417428	0.203922	0.126418	0.252637	0.357721	0.455852	0	0.391513	0.431565	0	0	0.0399892	0	0	0	0.22854
ENSG00000135272	MDFIC	0.823159	0	0	0	0	0	0	0	0	0	0	0	0	0	0	0	0	0	0	0	0	0
ENSG00000133454	MYO18B	0.818519	0	0.424588	0	0.694942	0	0.401762	0	0.0452134	0	0	0	0	0	0	0.0531573	0	0	0	0.044127	0	0
ENSG00000135960	EDAR	0.817935	0.0747304	0	0	0	0	0	0	0	0	0.550052	0	0	0	0	0	0	0	0	0	0	0
ENSG00000182885	ADGRG3	0.816119	0.142618	0	0	0	0	0	0	0	0	0	0	0	0	0	0	0	0	0	0.13666	0	0
ENSG00000152580	IGSF10	0.813908	0.333574	0.245426	0.168189	0.235036	0.726655	0.586878	0	0.265424	0.00646259	0.574264	0.387921	0	0.322089	0.414925	0	0	0	0	0	0.335983	0.330491
ENSG00000117707	PROX1	0.811653	0.0288906	0	0	0	0	0	0	0	0	0	0	0	0	0	0	0	0	0	0	0	0.681473
ENSG00000158470	B4GALT5	0.810751	0.562195	0.66725	0.515196	0.441688	0.347043	0.443616	0.597036	0.217541	0.200078	0.407364	0.31992	0.265353	0.591601	0.51848	0.417518	0.0823409	0.142343	0.206128	0.540838	0.611525	0.351288
ENSG00000112818	MEP1A	0.808113	0	0	0	0	0	0	0	0	0	0	0	0	0	0	0	0	0	0	0	0	0
ENSG00000092969	TGFB2	0.807365	0	0	0	0	0	0	0	0	0	0	0	0	0	0	0	0	0	0.551099	0	0	0
ENSG00000189280	GJB5	0.804088	0	0	0	0	0	0	0	0	0	0	0	0	0	0	0	0	0	0	0	0	0
ENSG00000158089	GALNT14	0.803277	0.314934	0	0	0	0	0	0.607564	0	0.263837	0.0673927	0.407873	0	0.288905	0.0422286	0.016713	0.0732881	0.417006	0.587029	0.830881	0.224876	0.807771
ENSG00000156076	WIF1	0.802239	0.0165639	0	0	0	0	0	0	0.896806	0	0	0	0	0	0	0.361133	0	0	0	0	0	0.455709
ENSG00000171094	ALK	0.801179	0.137144	0	0.823538	0.0596821	0	0.527731	0.0137433	0	0	0	0	0	0.0336441	0	0	0	0	0	0	0.735932	0.614225
ENSG00000185271	KLHL33	0.800754	0.7632	0	0.784577	0.548239	0	0	0.714328	0	0.912123	0.622382	0.870087	0.752548	0.528449	0.128222	0	0	0	0	0.398449	0.325121	0
ENSG00000140873	ADAMTS18	0.800163	0	0	0.380334	0	0.505799	0	0	0	0	0	0	0.374869	0	0	0	0	0.100054	0.327918	0.765703	0	0.943629
ENSG00000156564	LRFN2	0.799244	0.187521	0.238543	0.570192	0	0	0.293789	0.27837	0.371952	0.545039	0.544511	0.244382	0	0.472653	0.567787	0.73476	0.287953	0.30807	0.669206	0.613935	0.429788	0.663562
ENSG00000106436	MYL10	0.798739	0.741312	0	0.514347	0	0	0	0	0	0	0.962032	0	0	0	0.552087	0	0	0	0	0	0.293107	0
ENSG00000204624	DISP3	0.797689	0	0	0.561235	0.127408	0	0.344445	0.155627	0	0	0.0630672	0	0	0	0.0118658	0.533449	0	0	0.227597	0	0	0.102256
ENSG00000187773	FAM69C	0.797594	0.0600924	0	0	0	0	0	0	0	0	0	0	0	0	0	0	0	0	0	0	0	0.228265
ENSG00000186265	BTLA	0.797377	0.697258	0	0.486768	0	0	0	0	0	0	0	0	0	0	0.833202	0	0	0	0	0.0352956	0.85421	0.447107
ENSG00000119698	PPP4R4	0.797183	0.0996127	0.306972	0.175354	0.187976	0	0	0.149431	0	0.00899031	0.270679	0	0.514824	0.139904	0.176046	0.393555	0.462488	0.314015	0.424988	0.297155	0.250178	0.293536
ENSG00000166126	AMN	0.797003	0.809262	0.769124	0.150101	0.10017	0.229747	0	0.755198	0.669415	0.547346	0.775484	0.528249	0.810701	0.906403	0.937481	0.0830105	0	0	0.167268	0.876311	0.779901	0
ENSG00000166407	LMO1	0.795077	0.271759	0	0	0	0	0	0.259857	0	0.28646	0	0.189913	0	0.392337	0.600928	0.235001	0	0.367874	0.352531	0	0.0216295	0.860516
ENSG00000011083	SLC6A7	0.792905	0.846424	0.822335	0.574555	0.389911	0.308281	0.236562	0.63539	0.431399	0.56915	0.585528	0.454154	0.20878	0.816387	0.653754	0.528428	0.428351	0.581703	0.634072	0.87032	0.646168	0.262898
ENSG00000082556	OPRK1	0.792346	0	0.223587	0.324329	0	0	0.628284	0.283024	0.312825	0	0	0	0.0354278	0.3778	0.403234	0	0.314575	0	0	0	0.184938	0.363755
ENSG00000183671	GPR1	0.792299	0.0667323	0	0	0	0	0.515703	0	0	0.0363946	0	0.354394	0	0	0.107662	0.563383	0	0	0.415495	0	0.0591461	0
ENSG00000120549	KIAA1217	0.789307	0.115726	0.147585	0.0846167	0.0758339	0	0	0.108133	0	0	0	0	0	0.253197	0.021889	0	0.349634	0.401087	0.15702	0	0.0580569	0.944783
ENSG00000101958	GLRA2	0.785414	0.643498	0.365631	0.87384	0.234964	0	0.820401	0.230282	0.754485	0.575657	0.757263	0.397548	0.676642	0.103155	0.613184	0.178932	0.824079	0.0346861	0	0	0.566491	0.565968
ENSG00000140945	CDH13	0.785278	0.234709	0.251096	0.581434	0	0	0.418717	0.629213	0.334173	0.418875	0.35419	0.620134	0.317201	0.40437	0.569894	0.43037	0.488911	0.433594	0.190252	0.641439	0.44749	0
ENSG00000146242	TPBG	0.78454	0	0	0.439756	0	0.800661	0.322278	0	0.65187	0.941063	0.243881	0	0.948133	0	0	0.259785	0.675008	0	0	0.412208	0	0
ENSG00000165675	ENOX2	0.779947	0	0	0.192018	0	0	0.582463	0	0	0	0	0	0	0	0	0	0	0.00741342	0.533716	0	0.231508	0
ENSG00000173698	ADGRG2	0.778786	0.479415	0.13843	0.678105	0.0355491	0.26622	0.224449	0.438029	0.686386	0	0.438943	0.214298	0	0.015276	0.312684	0.316282	0.41477	0.0794963	0	0	0	0
ENSG00000167173	C15orf39	0.776692	0	0	0	0	0	0	0	0	0	0	0	0	0.0818562	0	0	0	0	0.591049	0	0	0
ENSG00000104059	FAM189A1	0.773635	0.140462	0.544095	0	0.185415	0	0	0.44782	0	0	0	0	0.0988865	0.329044	0	0.85029	0.512446	0.850438	0.790663	0.898481	0.547866	0.108824
ENSG00000150394	CDH8	0.770322	0.676544	0.605166	0.181914	0	0.0406742	0	0.252482	0	0	0.334335	0.0218198	0.0989549	0.325984	0.384093	0.332207	0	0.115036	0.372713	0.783288	0.603325	0.165136
ENSG00000140368	PSTPIP1	0.768807	0	0	0	0.149952	0	0	0	0.530333	0.151865	0	0	0	0	0	0.705486	0.00582252	0.561804	0.590491	0	0	0
ENSG00000115590	IL1R2	0.768377	0	0.0643549	0	0	0	0.429138	0	0	0.143311	0.32189	0.824206	0	0.078226	0	0.395487	0	0.150541	0	0	0	0.0642753
ENSG00000164951	PDP1	0.766736	0.355422	0.374638	0.545558	0.371978	0	0.413786	0.261617	0.263005	0.0470081	0	0.184969	0.532127	0.30448	0.0153223	0.4652	0.0393194	0	0.00702826	0	0.25434	0.248918
ENSG00000172680	MOS	0.764088	0	0	0	0	0	0	0	0	0	0	0	0	0	0	0	0	0.900819	0	0	0	0
ENSG00000101204	CHRNA4	0.76399	0.924198	0.916061	0.669828	0.687063	0.20277	0.369059	0.91271	0.307447	0	0.731677	0.52771	0.0757925	0.936026	0.838387	0.0830641	0.443416	0.478176	0	0.652171	0.0309625	0
ENSG00000060140	STYK1	0.761613	0.0288513	0.165393	0	0	0	0.150733	0	0	0	0	0	0	0	0	0.0319202	0	0	0.766246	0.0923299	0.218026	0.123953
ENSG00000149571	KIRREL3	0.76154	0.0832359	0	0	0.251082	0.565848	0	0	0.249781	0.363093	0	0.00371129	0.649953	0.241742	0.0831349	0.262625	0	0.550964	0	0.446252	0.340099	0
ENSG00000164484	TMEM200A	0.761212	0.212437	0.210873	0.274843	0	0	0.677935	0	0.369816	0	0.356336	0	0	0	0	0.394322	0.00280071	0.408838	0.364029	0.861807	0.358878	0.511391
ENSG00000133863	TEX15	0.761192	0.317416	0.33835	0	0	0	0	0.0964999	0	0	0.0639239	0	0	0	0	0	0.0830631	0	0	0	0	0
ENSG00000178860	MSC	0.760437	0.216648	0.0308882	0	0.0726879	0.167416	0	0.341889	0.117126	0	0.126688	0.606173	0.378064	0.0285213	0.065234	0.568062	0.47237	0.00524892	0.329254	0.167129	0	0
ENSG00000027075	PRKCH	0.758444	0.00115562	0	0	0	0	0	0	0	0	0	0	0	0	0	0	0	0	0	0	0	0
ENSG00000164694	FNDC1	0.756389	0	0.338159	0	0	0	0	0	0	0	0	0	0	0	0	0.190735	0	0	0	0	0	0
ENSG00000110628	SLC22A18	0.755987	0	0	0	0	0	0	0	0	0	0	0	0	0	0	0	0	0	0	0	0	0.384696
ENSG00000176387	HSD11B2	0.755002	0.344043	0	0	0	0	0	0	0	0	0	0	0	0	0	0	0	0	0	0	0	0.224244
ENSG00000167889	MGAT5B	0.75177	0.312891	0.318016	0.284613	0.579138	0.226853	0.035701	0.342579	0.396225	0.712663	0.282691	0.120601	0.487503	0.431415	0.381406	0.520145	0	0.0749877	0.288764	0.384557	0.319013	0.913011
ENSG00000036565	SLC18A1	0.751749	0	0	0.560954	0	0	0.411094	0	0.167892	0	0	0	0	0	0	0	0	0.410649	0.493991	0.258566	0.253704	0
ENSG00000005961	ITGA2B	0.749525	0.65858	0.276436	0.227702	0	0	0	0.119084	0.613847	0.266738	0.496447	0.348335	0.0131016	0.101841	0.44742	0.0153152	0.0517725	0.242469	0.11636	0	0.518299	0.534816
ENSG00000149201	CCDC81	0.743984	0	0	0.233372	0	0	0	0	0	0	0	0	0.747658	0	0.0942943	0	0	0	0	0	0	0
ENSG00000048052	HDAC9	0.743511	0	0	0	0	0	0	0	0	0.467259	0	0	0	0.0851278	0	0.267046	0	0.183919	0.257673	0.510962	0	0.18665
ENSG00000073803	MAP3K13	0.742977	0.194425	0.347844	0.0194217	0	0	0.271259	0.156636	0.0186279	0.0184807	0.242219	0.0384907	0.420252	0.0861619	0.292276	0	0	0	0.135278	0.0768034	0.324791	0.552354
ENSG00000165349	SLC7A3	0.742748	0.78005	0.0965026	0.842086	0	0	0.359683	0.383127	0.389827	0	0.608393	0.574132	0	0.274813	0.540758	0.176362	0.318859	0.416717	0.215406	0.00299234	0.391716	0
ENSG00000114861	FOXP1	0.742605	0	0	0	0	0	0	0	0	0	0	0.0325697	0	0	0	0	0.111692	0.348903	0.0806908	0.46389	0	0
ENSG00000111696	NT5DC3	0.737545	0.426758	0.414188	0.377385	0.209239	0	0.468475	0.408027	0.343876	0.366863	0.309827	0.274619	0.133501	0.416252	0.380163	0.421746	0.309405	0.41327	0.595332	0.657068	0.172117	0.44966
ENSG00000185760	KCNQ5	0.737216	0	0	0.111564	0.136067	0	0.26627	0.0188611	0	0	0.316948	0	0	0	0	0.651064	0.338741	0.489312	0.852827	0.835032	0	0.833734
ENSG00000147434	CHRNA6	0.735538	0.0504622	0	0	0	0	0	0.00762195	0	0	0	0	0.123141	0.56204	0	0	0	0	0	0.464621	0.156415	0
ENSG00000137204	SLC22A7	0.73515	0	0.729702	0.343548	0.490461	0	0.873614	0	0	0.310966	0.645134	0	0.864809	0	0.0795315	0	0.208406	0	0.0449661	0.217535	0	0
ENSG00000159248	GJD2	0.734321	0.450316	0.436699	0.799724	0.383762	0.234785	0.32969	0.400988	0.353605	0.0286281	0.438876	0.4409	0.12854	0.39162	0.396368	0	0	0	0	0	0.444865	0.451435
ENSG00000163534	FCRL1	0.73217	0	0	0	0	0	0	0	0	0	0	0	0	0	0	0	0	0	0	0	0	0
ENSG00000113212	PCDHB7	0.731851	0.646571	0.10682	0.0359229	0	0	0	0	0	0	0.6127	0	0	0	0	0.370284	0	0.0233225	0	0.077721	0.150119	0
ENSG00000119771	KLHL29	0.731285	0.352273	0.313837	0.233753	0.10269	0.0710112	0.108654	0.281166	0.166816	0.283452	0.263255	0.170993	0.0221257	0.356394	0.138003	0.303909	0.387847	0.214942	0.342665	0.210087	0.56855	0.200675
ENSG00000160207	HSF2BP	0.731042	0	0.00778783	0	0.150819	0	0	0.752275	0.0536532	0	0.0978766	0	0	0.482788	0.0594824	0.134897	0	0	0.130336	0	0	0.431436
ENSG00000100626	GALNT16	0.730406	0.36482	0.491566	0.528361	0.650898	0	0.0370162	0.419253	0.423047	0.237695	0.623466	0.0298823	0.566928	0.514618	0.381754	0.392679	0.390471	0.33962	0.582803	0.739525	0.368077	0
ENSG00000095397	WHRN	0.729816	0.360502	0.636165	0.283772	0.198772	0	0	0.30397	0	0	0	0	0.109211	0.421061	0.232574	0	0	0	0	0	0.41476	0
ENSG00000180205	WFDC9	0.724731	0	0	0	0	0	0	0	0	0	0	0	0	0	0	0	0	0	0	0	0	0
ENSG00000001626	CFTR	0.723428	0	0	0	0	0	0	0.103908	0	0	0.370284	0	0	0	0	0	0	0	0	0.634764	0	0.894799
ENSG00000111432	FZD10	0.72281	0.124422	0	0	0	0	0	0	0	0	0	0.0488215	0	0	0	0	0	0	0	0.0594525	0	0
ENSG00000137875	BCL2L10	0.722628	0.60002	0.661735	0	0	0	0	0	0	0	0	0	0	0	0	0	0	0	0.650822	0	0.0936968	0
ENSG00000147246	HTR2C	0.718791	0.96154	0.878061	0.883778	0.528748	0	0	0.616667	0.934431	0.449295	0.808408	0.306204	0.404945	0.876977	0.91335	0.766542	0.8146	0	0	0	0.757185	0.898843
ENSG00000144278	GALNT13	0.717189	0.455335	0.32787	0.44479	0	0.272566	0.366402	0.381067	0.420372	0.415338	0.429071	0.192441	0.538397	0.376154	0.230326	0.326097	0.256859	0	0	0.415197	0.395515	0
ENSG00000249242	TMEM150C	0.713458	0.40767	0.395974	0.354786	0.317771	0	0.52764	0.585007	0.449806	0.601974	0.391292	0.448632	0	0.437309	0.352745	0.43628	0.43234	0.45963	0.543802	0.76042	0.434207	0.177219
ENSG00000165617	DACT1	0.712373	0	0	0	0	0	0.114429	0	0	0	0	0	0	0	0	0	0	0	0	0	0	0
ENSG00000180875	GREM2	0.711878	0.620769	0.779627	0.78542	0	0	0.084148	0.552053	0.532194	0.402612	0.626191	0.419119	0.444234	0.413225	0.63286	0.603283	0.497255	0.477251	0.0491725	0.363237	0.459138	0
ENSG00000151136	BTBD11	0.708016	0.623626	0.566207	0.64948	0.669088	0.561614	0.664663	0.559949	0.382943	0.406145	0.461466	0.418849	0.40302	0.56209	0.452306	0	0.0325658	0	0	0	0.441158	0.597654
ENSG00000114529	C3orf52	0.707422	0.256776	0	0	0.931504	0	0.314802	0.0348032	0	0.492873	0.0103406	0	0.853295	0	0.613863	0	0	0	0	0.064758	0	0
ENSG00000176697	BDNF	0.707197	0.338123	0	0.305971	0.425583	0	0	0.395659	0.410722	0.566436	0.552531	0.428876	0	0	0	0.545359	0.425011	0.300025	0.773177	0.549245	0	0
ENSG00000183908	LRRC55	0.707123	0.328281	0.277883	0	0.31236	0	0.234461	0.0954373	0.427276	0.238805	0.398907	0	0	0.127187	0	0.514319	0	0	0.308552	0	0.784777	0
ENSG00000163624	CDS1	0.706162	0.594104	0.733185	0.389667	0.493655	0.53926	0.176205	0.670088	0.00839248	0.273871	0.226361	0.11323	0.396195	0.7095	0.348776	0.397219	0.300832	0.429208	0	0.894842	0.436652	0.241282
ENSG00000187871	GFRAL	0.703822	0	0.214792	0.278716	0.187476	0	0	0.25246	0	0	0	0	0	0.621978	0.715641	0	0	0	0	0	0.913919	0
ENSG00000117016	RIMS3	0.700972	0.619239	0.471391	0.491127	0	0	0.611819	0.468491	0.519681	0.47468	0.607662	0.527264	0.444821	0.449545	0.566627	0	0	0	0	0	0.448954	0.585387
ENSG00000111837	MAK	0.698439	0.282729	0	0.251214	0	0	0.242397	0	0.0397878	0	0.368737	0	0	0	0	0	0	0.172772	0	0	0.0508944	0
ENSG00000175040	CHST2	0.696634	0	0.0531816	0	0.0119269	0	0	0.0756242	0	0	0	0.010366	0	0	0	0	0	0	0.566836	0.0236272	0.227116	0
ENSG00000164038	SLC9B2	0.692204	0.226029	0.206187	0.272915	0	0	0.203952	0	0.330811	0	0.654345	0.707463	0	0	0	0	0	0.339561	0.339152	0	0	0
ENSG00000164935	DCSTAMP	0.691658	0	0.569657	0	0.807223	0	0	0	0	0	0	0.642819	0	0.154285	0	0	0	0	0.223594	0	0	0
ENSG00000138735	PDE5A	0.690413	0	0	0	0	0	0	0	0	0	0	0	0	0	0	0	0	0	0	0	0	0.95517
ENSG00000134780	DAGLA	0.690358	0	0	0	0	0	0.188798	0.00224537	0	0.245938	0	0	0.0245321	0.0148037	0.0891986	0.338397	0.286803	0.107364	0.692331	0.48984	0	0
ENSG00000107518	ATRNL1	0.68986	0.202396	0.157296	0.19214	0	0	0	0.347731	0	0	0	0	0.176718	0.261714	0	0.643792	0.357921	0.602041	0.384532	0.615621	0	0.2167
ENSG00000113805	CNTN3	0.685296	0.401385	0	0	0	0	0.441239	0.318511	0.772575	0.204692	0	0	0	0.128781	0	0.696495	0	0.539402	0	0.784132	0.111387	0
ENSG00000181450	ZNF678	0.684864	0	0	0	0	0	0	0	0.0573306	0	0.0827251	0	0.371685	0.0612424	0	0.515179	0	0.530642	0	0	0	0.122748
ENSG00000176919	C8G	0.682547	0.439686	0.0377815	0.0919977	0	0	0	0	0	0.181331	0.390505	0	0.116084	0.200306	0.141536	0	0	0.0645022	0.0783044	0.0389802	0.185508	0
ENSG00000116183	PAPPA2	0.680439	0	0.410877	0	0.996557	0	0.0569826	0.288599	0	0	0.726736	0	0	0	0	0.50058	0	0.004329	0.167873	0.684504	0	0
ENSG00000134245	WNT2B	0.678983	0.619226	0.11333	0.07978	0	0	0	0.0891339	0.429518	0	0	0	0	0.70948	0.402412	0	0.324249	0.934822	0.00934648	0	0	0
ENSG00000168646	AXIN2	0.676348	0.0866252	0	0	0	0	0	0.00689393	0.093668	0	0	0	0	0	0	0	0	0	0.0181778	0	0	0
ENSG00000184985	SORCS2	0.675667	0	0	0	0	0	0	0	0	0	0	0	0.52356	0	0	0.232964	0	0.17625	0	0.776427	0	0.840724
ENSG00000179314	WSCD1	0.672166	0	0	0	0	0	0	0	0	0	0	0	0	0	0	0	0	0	0.251549	0	0	0
ENSG00000175894	TSPEAR	0.672068	0.408711	0.16638	0.113561	0	0	0	0	0	0	0.210153	0	0.970871	0	0	0	0	0	0	0	0	0.0419169
ENSG00000153904	DDAH1	0.671298	0.0200546	0.176505	0	0	0	0	0	0.00738538	0.0243997	0	0	0	0	0.206253	0	0	0	0	0	0.374373	0.443872
ENSG00000095951	HIVEP1	0.667405	0.250504	0.0788034	0.125588	0	0	0.284973	0	0.0646589	0	0	0	0	0.259917	0.195444	0	0	0.39696	0	0.557129	0.0629167	0.354982
ENSG00000113645	WWC1	0.664126	0	0.165695	0	0.382733	0	0	0.0394349	0	0.233877	0	0.0181085	0	0	0	0.582834	0	0.188292	0.425885	0.711162	0.0527434	0
ENSG00000138315	OIT3	0.661931	0	0	0.107671	0.692405	0.958466	0	0	0.110019	0	0	0.284196	0	0	0.404174	0.0574271	0.853794	0	0.039005	0.0145228	0	0
ENSG00000171303	KCNK3	0.661819	0.439872	0.392281	0.630643	0.671403	0.320771	0.482349	0.511246	0.220548	0	0.556438	0.384476	0.189844	0.511433	0.529671	0	0	0	0	0.285916	0.403269	0.270919
ENSG00000106341	PPP1R17	0.661653	0	0	0.0832847	0	0	0	0	0.218941	0.151417	0.108549	0	0	0	0	0	0	0	0	0	0	0
ENSG00000106689	LHX2	0.660142	0.0936055	0	0	0	0	0	0.179029	0.953994	0.671169	0.814792	0.268726	0.0260223	0	0	0.764832	0	0.890035	0.705847	0	0	0
ENSG00000164176	EDIL3	0.659445	0.477118	0.11672	0.477324	0	0	0	0.100728	0.278058	0.531056	0.182938	0	0.0775401	0.1283	0.153172	0	0	0.166022	0.181198	0	0	0
ENSG00000125247	TMTC4	0.657663	0.306279	0.294121	0.681394	0	0.370422	0.497754	0.382984	0	0	0.344792	0.264169	0	0.115433	0.402656	0	0	0	0	0.0974214	0.367355	0
ENSG00000134443	GRP	0.656517	0	0.150923	0	0	0	0	0	0.835835	0.957602	0.407319	0	0	0	0	0	0	0.474533	0.566657	0.920665	0	0
ENSG00000159784	FAM131B	0.656509	0.156677	0.0419388	0	0.524036	0.0437342	0	0.214605	0	0	0.00704622	0	0	0	0	0.574617	0	0.205977	0.471423	0.313712	0.076035	0.166625
ENSG00000151948	GLT1D1	0.65154	0.508373	0.401451	0.514998	0.369602	0.103371	0.359387	0.591081	0	0.634331	0.54381	0.340235	0.386995	0.508121	0.374423	0.452164	0.228796	0.272476	0.380396	0.60448	0.593121	0.294628
ENSG00000144893	MED12L	0.651065	0.531517	0.352583	0.639256	0.0555395	0.100562	0.277906	0.503579	0.382434	0.287785	0.429903	0	0.264787	0.38735	0.325018	0.378559	0	0.0117965	0.156601	0.230646	0.575998	0.518202
ENSG00000254585	MAGEL2	0.650127	0.419896	0.709615	0.66456	0.0592486	0	0.717707	0.121616	0.635754	0.244664	0.439419	0.42351	0	0.387361	0.322803	0	0	0	0.0773313	0	0.670563	0
ENSG00000155858	LSM11	0.649477	0.536671	0.412643	0.147738	0.612192	0	0.184302	0.424969	0.01338	0	0.346307	0.159595	0.141344	0.556025	0.296524	0.450959	0	0.215068	0.877046	0.0968857	0.167475	0
ENSG00000105613	MAST1	0.644272	0.448063	0.545082	0.406205	0.442588	0.436062	0.340581	0.619973	0.43056	0.449935	0.405436	0.353113	0.397201	0.518613	0.430915	0.335643	0.392673	0.429895	0.433274	0.428646	0.444974	0.364277
ENSG00000183395	PMCH	0.643155	0.59012	0.356846	0	0.426973	0	0	0	0	0	0	0	0	0	0	0	0	0.0333333	0	0	0.668102	0
ENSG00000185052	SLC24A3	0.642199	0.655525	0.479251	0.26945	0	0.407777	0.242531	0.506989	0.400976	0.465889	0.408031	0.250967	0.135695	0.386492	0.438864	0.388634	0.370625	0.589441	0.491978	0.376516	0.440659	0.479111
ENSG00000119121	TRPM6	0.642135	0.211069	0	0	0.0738439	0	0	0	0	0	0.842712	0	0	0	0	0	0.782857	0	0	0	0	0
ENSG00000162631	NTNG1	0.641585	0.858549	0.149583	0.343289	0.406987	0	0.258579	0.585876	0.744935	0.761306	0.428537	0.364297	0	0.421013	0.245758	0.14603	0.115544	0.567299	0	0.700195	0	0.398768
ENSG00000132259	CNGA4	0.639576	0	0	0	0	0	0	0.570299	0	0	0.744538	0	0	0.567484	0.170642	0.655083	0	0.898892	0	0.790162	0	0
ENSG00000141086	CTRL	0.639492	0	0.00394654	0.0529595	0.0527457	0	0.0593935	0.127101	0.285804	0.407189	0.404359	0.146113	0.126936	0	0.0559022	0	0	0.0366342	0.159559	0	0.363763	0
ENSG00000174453	VWC2L	0.638154	0.587118	0.460158	0.584446	0.181865	0	0.418331	0.394638	0.783973	0.734524	0.746182	0.387744	0	0.603785	0.37502	0.0395035	0	0.47591	0	0	0.749498	0
ENSG00000166025	AMOTL1	0.6367	0.432229	0.0203396	0.280018	0	0	0.62921	0.380894	0.558771	0.433621	0.59275	0.446127	0.022393	0.185833	0.0506035	0	0	0	0	0	0.1542	0
ENSG00000138741	TRPC3	0.635961	0.399216	0.401502	0.277742	0	0.337315	0	0.240024	0	0.0788694	0	0.370568	0	0.644201	0.325273	0	0	0	0	0.129745	0.421833	0.177827
ENSG00000171617	ENC1	0.635385	0.295812	0.184096	0	0	0	0	0.00345788	0.518739	0.68328	0.0566047	0.14698	0.837724	0	0.148994	0.839655	0.669132	0.703072	0.84167	0.819991	0.28045	0
ENSG00000158966	CACHD1	0.635331	0.759049	0.13645	0.220517	0.0526491	0	0.193889	0.54747	0.446612	0.267102	0.470341	0.662115	0.643698	0.596438	0.400717	0	0	0	0.397736	0	0	0.0523488
ENSG00000164082	GRM2	0.635129	0	0	0	0.694253	0.415916	0	0.175674	0.565608	0	0.186923	0.186269	0	0	0	0	0	0.132443	0	0.613624	0	0
ENSG00000011677	GABRA3	0.634952	0.626803	0.650003	0.568362	0	0.0748727	0.386649	0.656316	0.535357	0.337015	0.472254	0.413	0.149756	0.620986	0.439615	0.595639	0.508338	0.496127	0	0.60087	0.588913	0.399556
ENSG00000185774	KCNIP4	0.634502	0.411757	0.462655	0.414579	0.109052	0	0.071123	0.36953	0.608664	0.468349	0.453376	0.468997	0	0.468312	0.450762	0.227987	0.0186825	0.0884199	0.0180514	0.341065	0.638511	0
ENSG00000204186	ZDBF2	0.634312	0.455995	0.477468	0.699913	0.44988	0	0.723974	0.410793	0.472047	0.273053	0.459647	0.420268	0	0.39371	0.657479	0.296704	0.108152	0.349953	0.447413	0.399496	0.625255	0
ENSG00000124098	FAM210B	0.632698	0	0.00181937	0	0.192305	0	0	0.060379	0.251224	0.00271108	0	0.0232275	0	0.205243	0	0	0	0	0	0	0.0612374	0
ENSG00000101292	PROKR2	0.632251	0.513033	0	0	0	0	0	0	0	0	0	0	0	0	0	0	0	0.047619	0.183796	0	0	0
ENSG00000157445	CACNA2D3	0.632214	0	0.035501	0	0	0.507123	0	0	0	0	0	0	0	0.0420825	0.279716	0	0	0.0252066	0.384795	0.735001	0	0.899479
ENSG00000140986	RPL3L	0.632125	0	0	0	0.271653	0	0	0.0889447	0	0	0	0.110223	0	0	0	0	0	0	0	0	0.115993	0
ENSG00000187699	C2orf88	0.631484	0	0	0	0.0197495	0	0	0	0	0	0	0	0	0	0	0.0229093	0.42781	0.133429	0	0.792095	0	0
ENSG00000181585	TMIE	0.629263	0.667214	0.423514	0.672248	0	0	0.40626	0.225345	0.825004	0.356526	0.694143	0.600813	0	0.26378	0.704656	0.044912	0	0	0	0	0.454051	0.427363
ENSG00000149575	SCN2B	0.628561	0.628432	0.801173	0.619604	0.455446	0.447335	0.42072	0.631484	0.395188	0.452773	0.489327	0.439961	0.517455	0.678466	0.632711	0.435678	0.12957	0.370046	0.45706	0.62581	0.628343	0.439906
ENSG00000087085	ACHE	0.628042	0.529932	0.543094	0.644173	0.477154	0.0573261	0.484212	0.485394	0.456116	0.40374	0.464592	0.450264	0	0.488812	0.487488	0	0	0.0186983	0.261468	0.411646	0.488258	0.475879
ENSG00000107105	ELAVL2	0.627316	0.48122	0.503161	0.674931	0.473198	0.464711	0.626126	0.464286	0.31642	0.294777	0.380059	0.404958	0.0483957	0.482929	0.532667	0.1139	0.379753	0.447872	0.463979	0.398059	0.487087	0.538451
ENSG00000188493	C19orf54	0.625308	0.00525359	0.0967806	0.0723326	0.20999	0	0.118323	0	0	0.237848	0	0	0	0.150232	0.230441	0.121345	0	0.0620671	0	0.0921802	0	0.178566
ENSG00000138604	GLCE	0.624509	0.101169	0.0999963	0.284998	0.414991	0.322938	0.158752	0	0.181892	0.181071	0.344193	0	0	0	0.0575437	0.368354	0	0.202406	0.0811026	0	0.389915	0.366251
ENSG00000165805	C12orf50	0.623678	0.797417	0.984507	0	0	0	0	0	0	0	0.584139	0	0	0	0.796457	0	0	0	0.587026	0	0	0
ENSG00000117154	IGSF21	0.623241	0	0	0	0.352225	0	0	0	0	0	0	0	0.296274	0.0577198	0	0.228605	0.512018	0.354041	0.0418752	0.729496	0	0
ENSG00000095713	CRTAC1	0.623116	0	0	0.039944	0.615928	0.263861	0.170833	0.114529	0	0	0	0	0.0548797	0.110078	0	0.61053	0.639157	0.333933	0.362033	0	0	0.668231
ENSG00000189127	ANKRD34B	0.622935	0.757074	0.876979	0.662073	0.574347	0.586305	0.447757	0.669053	0.300288	0.359826	0.336187	0.33236	0	0.900879	0.786269	0.115186	0	0	0	0.519566	0.702318	0.707243
ENSG00000130226	DPP6	0.622551	0.408233	0.457038	0.57109	0.42698	0.396296	0.427414	0.539357	0.466287	0.444003	0.470704	0.400514	0.408921	0.470524	0.459558	0.436756	0.142565	0.313772	0.394785	0.477316	0.463105	0.390115
ENSG00000170382	LRRN2	0.622041	0.0246514	0.262757	0.0686396	0.210779	0	0.170236	0.0409107	0.0959038	0	0.0201522	0	0.0552807	0	0	0.462228	0.392494	0.266426	0.672622	0.466908	0.1164	0.283278
ENSG00000100095	SEZ6L	0.621754	0.608599	0.540277	0.325811	0.550064	0	0.0784094	0.428559	0.336742	0.0653079	0.454281	0.348065	0.394017	0.38562	0.420672	0.578427	0.401429	0.437244	0.596015	0.752857	0.439434	0.450183
ENSG00000110042	DTX4	0.621427	0	0	0.0934399	0	0	0.0861298	0.0127546	0	0	0.0490502	0	0	0	0.201949	0	0	0.486437	0.282469	0.240893	0.118821	0.00056809
ENSG00000197893	NRAP	0.620024	0.431597	0.00488599	0	0	0	0	0	0	0	0	0	0	0	0	0.561658	0	0	0	0	0.0202109	0
ENSG00000081026	MAGI3	0.616751	0.51615	0.460347	0.264213	0.18764	0	0.380267	0.659298	0.385204	0.619254	0.512622	0.434407	0.239846	0.528174	0.383597	0.334267	0	0.354784	0.294688	0.353872	0.617306	0.198579
ENSG00000156599	ZDHHC5	0.614758	0.312061	0.629893	0.185418	0.222095	0	0.208235	0.310763	0.0106465	0	0	0.100692	0.361158	0.50212	0.331689	0.298316	0	0	0.16799	0.489644	0.542516	0.405776
ENSG00000251322	SHANK3	0.614329	0	0.52009	0	0	0	0	0	0.448174	0	0.58013	0	0	0.0271829	0	0.628611	0	0.0905303	0.140774	0.295191	0.596731	0
ENSG00000144283	PKP4	0.613677	0.310397	0.413713	0.192379	0.167694	0.306393	0.262724	0.313006	0.149223	0.0589659	0.252782	0	0	0.39065	0.342708	0.376009	0.278272	0.339743	0.592854	0.229563	0.518488	0.423092
ENSG00000175274	TP53I11	0.612448	0	0	0.237914	0	0.389553	0	0	0.738985	0.468363	0.258263	0.410614	0.433079	0	0.0903526	0.41893	0.454954	0	0.352165	0	0	0.909046
ENSG00000162194	LBHD1	0.610201	0	0	0.172269	0.245595	0	0.337459	0.0570991	0.0339402	0.663465	0	0	0	0.0934605	0.178187	0.0311423	0	0	0	0	0	0.315228
ENSG00000125510	OPRL1	0.610199	0.642895	0.702897	0.666987	0.455422	0.335408	0.66609	0.683709	0.673552	0.507437	0.719231	0.563081	0.448707	0.644107	0.671224	0.359398	0.322379	0.418327	0.386658	0.515744	0.556611	0.0575525
ENSG00000240720	LRRD1	0.609979	0	0	0.428087	0.0210019	0.746139	0	0.407483	0	0	0	0	0.508482	0.270084	0.0953094	0	0	0	0.215035	0.071497	0	0
ENSG00000019505	SYT13	0.608848	0.63287	0.631328	0.5083	0.590493	0	0.451075	0.410396	0.46243	0.434619	0.53468	0.397634	0.0873663	0.609606	0.651885	0.46043	0.47026	0.468873	0.454695	0.430498	0.562454	0.45223
ENSG00000100604	CHGA	0.607362	0.679517	0.770545	0.398874	0.51239	0.196735	0.344925	0.64574	0.3228	0.405694	0.439896	0.448534	0.438683	0.670193	0.542757	0.399457	0.448788	0.378825	0.302551	0.583138	0.584642	0.469173
ENSG00000094975	SUCO	0.606838	0.00252576	0.0174006	0.167704	0	0	0.350706	0.0195348	0.0151544	0	0.0894138	0	0	0	0	0.177708	0.114488	0	0	0.205567	0.0556883	0.19853
ENSG00000117114	ADGRL2	0.606079	0.545677	0.596021	0.116958	0.517909	0	0	0.671439	0	0	0.239499	0.268141	0	0.362445	0.355421	0.28122	0	0.356538	0	0.683456	0.480995	0
ENSG00000116675	DNAJC6	0.604008	0.556637	0.431706	0.584254	0.47433	0.316582	0.441659	0.391499	0.429754	0.410687	0.432985	0.379034	0.25567	0.420787	0.442313	0.378325	0.23078	0.43596	0.544658	0.373147	0.418239	0.365215
ENSG00000170054	SERPINA9	0.60177	0.439077	0.0769544	0	0.0313015	0	0	0	0.769219	0	0	0	0.777105	0	0	0	0	0	0	0	0.0281195	0
ENSG00000143858	SYT2	0.600759	0.480482	0.923803	0.530037	0.462391	0.701774	0.156666	0.913443	0	0.874388	0.321226	0.45154	0.929498	0.951879	0.43917	0	0	0	0	0.451939	0.4824	0
ENSG00000147676	MAL2	0.600567	0.644772	0.322481	0.595246	0	0	0.614769	0.364513	0.362412	0.363749	0.417677	0.602407	0.278088	0.245459	0.411485	0.614745	0.53526	0.609588	0.379505	0.87149	0.330469	0.104318
ENSG00000139364	TMEM132B	0.600428	0.0968883	0	0.0592349	0	0	0	0	0	0	0	0	0	0	0.143112	0.689418	0.50334	0.430409	0.579932	0.882538	0	0.519883
ENSG00000174106	LEMD3	0.600376	0.331768	0.491082	0.608144	0.0118015	0	0.351086	0.125594	0.221766	0.125532	0.118181	0	0.177232	0.217361	0.150883	0.449286	0.350407	0.0131494	0.310879	0.288503	0.199611	0
ENSG00000164715	LMTK2	0.59938	0.391379	0.656861	0.171612	0.378074	0	0.0235652	0.664226	0.238108	0.501127	0.308496	0.264988	0.532105	0.651346	0.361093	0.530848	0.331176	0.297717	0.423649	0.581728	0.595506	0
ENSG00000162782	TDRD5	0.599334	0.967299	0.792206	0.163567	0.438946	0	0	0.975137	0.950395	0.931241	0.944029	0.192564	0.899559	0.881358	0.0605053	0.060561	0	0	0.311132	0.109743	0.180457	0.0373722
ENSG00000077942	FBLN1	0.598248	0	0	0	0	0	0	0	0	0	0	0	0	0	0	0	0	0	0	0	0	0
ENSG00000164404	GDF9	0.596868	0	0	0	0.0386802	0	0	0	0	0	0	0	0.296123	0	0	0	0	0	0	0	0	0.267028
ENSG00000153060	TEKT5	0.596183	0.738372	0.787942	0.3516	0.0344412	0	0	0.904657	0.931749	0.908333	0.91609	0.813311	0.935082	0.913471	0.901	0.449736	0.560528	0	0	0.77734	0.536514	0
ENSG00000134775	FHOD3	0.595459	0.317338	0.418653	0.356211	0.404804	0	0	0.528305	0.295874	0.375828	0.399055	0.524396	0.304585	0.392733	0.374897	0	0.444862	0.47922	0	0.390791	0.342856	0
ENSG00000162670	BRINP3	0.595075	0.240976	0.261324	0.687989	0.0294798	0	0	0.164095	0.571635	0.53198	0.271716	0.313942	0.368171	0.3317	0.400858	0.513571	0.306914	0	0	0.402836	0.148645	0.715847
ENSG00000140836	ZFHX3	0.594899	0.371706	0.679457	0.565533	0	0	0.610539	0.354615	0.773065	0.720015	0.640556	0.402152	0.668231	0.625884	0.436194	0	0	0	0	0	0.326438	0
ENSG00000146700	SSC4D	0.592836	0	0	0.300838	0.613849	0	0	0.0306011	0.0386424	0.536782	0	0.134812	0	0	0	0.0193513	0	0	0.0957094	0	0	0.123316
ENSG00000152822	GRM1	0.592644	0.491874	0.417215	0.60831	0	0.0142697	0.119644	0.518106	0.11117	0.0459108	0.439063	0.51713	0	0.435209	0.291223	0.419247	0	0.404826	0.528477	0.211139	0.55951	0.19823
ENSG00000180773	SLC36A4	0.591232	0.554159	0.412112	0.695679	0.32673	0.404378	0.548047	0.493036	0.422219	0.390387	0.437454	0.429354	0.477873	0.472861	0.569631	0.22646	0	0.00867769	0.434222	0.344288	0.430553	0.369891
ENSG00000182938	OTOP3	0.59018	0	0	0	0	0	0	0.239001	0	0	0	0	0	0	0	0.106223	0	0	0.293464	0	0	0
ENSG00000113282	CLINT1	0.590021	0.308957	0.203328	0.278247	0.149405	0	0.455995	0.0199838	0	0	0	0	0	0.189099	0.215037	0.204036	0.0493217	0.361664	0.32889	0.123981	0.0314933	0.243363
ENSG00000166159	LRTM2	0.589085	0.385674	0.441645	0.293514	0.461334	0.164771	0	0.582052	0.332822	0.0411747	0.460183	0.426486	0.214114	0.619026	0.44479	0.27543	0	0	0	0.305791	0.420169	0.531081
ENSG00000131969	ABHD12B	0.587728	0	0	0.285758	0	0	0	0	0	0	0.7509	0	0	0	0	0	0	0	0	0	0	0
ENSG00000127578	WFIKKN1	0.5868	0.00452756	0	0	0	0	0	0	0	0	0.147938	0	0	0	0	0	0	0	0	0	0	0
ENSG00000196132	MYT1	0.58649	0.00262467	0.20301	0	0	0.14	0.28765	0.0157208	0	0	0.0899375	0	0	0.246231	0.312362	0.220051	0	0	0.264432	0	0	0
ENSG00000182218	HHIPL1	0.586341	0.496428	0	0	0	0	0	0	0.647092	0	0	0	0	0	0	0	0	0	0	0	0.811608	0
ENSG00000006283	CACNA1G	0.586168	0.431774	0.371144	0.334359	0.368485	0.504387	0	0.480846	0.412311	0.63132	0.554007	0.232087	0.385566	0.431427	0.313388	0.135318	0.427417	0.309071	0.139079	0.439848	0.192298	0.409785
ENSG00000112149	CD83	0.585301	0.815163	0.816551	0.737329	0.364705	0	0	0.89805	0.708868	0.313989	0.908705	0.721003	0.561749	0.617452	0.750651	0	0	0	0	0	0.411622	0
ENSG00000164830	OXR1	0.584977	0.500328	0.324844	0.222391	0.394427	0	0.21515	0.355982	0.360932	0.443077	0.268122	0.146916	0.11504	0.395778	0.289643	0.323381	0.167957	0.411297	0.40092	0.328431	0.327401	0.398484
ENSG00000153551	CMTM7	0.584115	0	0	0	0	0	0	0	0	0	0	0	0	0	0	0	0	0	0	0	0	0
ENSG00000143127	ITGA10	0.58305	0	0.0361503	0	0	0	0	0.0966482	0	0	0	0	0	0.527013	0.142185	0	0	0	0.164381	0	0.0218271	0
ENSG00000116106	EPHA4	0.582911	0.138563	0.302053	0.0532923	0.0096551	0	0	0.124442	0	0	0	0.00383926	0	0.2852	0	0.592162	0.0938722	0.463487	0.80778	0.521177	0	0
ENSG00000145934	TENM2	0.582403	0.752987	0.607036	0.220056	0.351461	0	0	0.555549	0.620878	0.516782	0.537601	0.571795	0.292544	0.594129	0.591229	0.374916	0.272919	0.58131	0.627222	0.696061	0.525295	0.398437
ENSG00000066032	CTNNA2	0.582184	0.400678	0.31856	0.273225	0.222739	0.101258	0.310151	0.137068	0.164286	0.12373	0.274001	0.201085	0.29426	0.347273	0.314511	0.244579	0	0.394955	0.238422	0.50859	0.358632	0.0736715
ENSG00000233932	CTXN2	0.581334	0.651476	0.57939	0.546704	0	0	0.44881	0.631322	0.658959	0.414179	0.731335	0.631186	0	0.47334	0.689849	0.366725	0.428627	0.402265	0.465484	0	0.478444	0.445838
ENSG00000182240	BACE2	0.580627	0	0	0	0	0	0	0	0	0	0	0	0	0	0	0	0	0	0.19558	0	0	0
ENSG00000144285	SCN1A	0.580575	0.721213	0.820432	0.503511	0.586851	0.418286	0.129577	0.808395	0.336537	0.611454	0.414495	0.395001	0.849317	0.849457	0.606033	0.36544	0	0.0563017	0.225091	0.789366	0.609898	0.664234
ENSG00000145247	OCIAD2	0.580008	0.117296	0.0565404	0	0.345214	0	0.192217	0.108258	0.242332	0.610413	0.306286	0.12484	0.182911	0.0353876	0.148788	0.62123	0.602065	0.39131	0.613385	0.726426	0.0431706	0.148427
ENSG00000026508	CD44	0.579998	0	0	0	0	0	0	0	0	0.0510459	0	0	0	0	0	0	0	0	0	0	0	0
ENSG00000139182	CLSTN3	0.579387	0.574959	0.625225	0.466091	0.463027	0.30482	0.387841	0.567136	0.450118	0.45008	0.468859	0.441914	0.441667	0.61832	0.564111	0.43287	0.37017	0.288659	0.422424	0.612695	0.471424	0.603067
ENSG00000186280	KDM4D	0.578997	0	0	0.591144	0	0	0.140451	0	0.601537	0.187219	0	0	0	0	0	0	0	0	0	0.357078	0.54621	0.23062
ENSG00000155886	SLC24A2	0.578079	0.532766	0.589252	0.294745	0.612235	0.178387	0.218896	0.385329	0	0	0	0.0481188	0	0.623898	0.359999	0.540243	0	0	0.594729	0.610571	0.266954	0.360707
ENSG00000006740	ARHGAP44	0.577289	0.423253	0.607162	0.495539	0.613831	0.459515	0.456862	0.554093	0.405256	0.332364	0.407256	0.375035	0.353053	0.675573	0.420334	0.548897	0.278172	0.464446	0.422915	0.386505	0.43683	0.148384
ENSG00000159840	ZYX	0.576777	0	0.049916	0	0.59516	0.29338	0	0.0258667	0	0	0	0	0	0.147757	0	0.00296473	0	0	0.0161541	0	0	0
ENSG00000165209	STRBP	0.575874	0.419018	0.420159	0.346454	0.424881	0.299544	0.0852697	0.413007	0.25226	0.406742	0.204432	0.15709	0.369439	0.424649	0.361185	0.458072	0.338563	0.39864	0.342548	0.610825	0.408293	0.412586
ENSG00000143318	CASQ1	0.575726	0	0	0	0	0	0	0	0	0	0	0	0	0	0	0	0	0	0	0	0	0
ENSG00000255508	AP002990	0.574691	0.123488	0.0815589	0	0.12736	0	0	0.502161	0	0.135475	0.370338	0.523794	0.164626	0.438257	0.122362	0.216875	0	0	0	0.0338334	0.182611	0.0859844
ENSG00000169181	GSG1L	0.574487	0.314569	0.172283	0.24666	0.734329	0	0	0	0.310812	0.678555	0	0	0.140062	0.274797	0.316906	0.694623	0	0.354836	0	0.370536	0.0577074	0
ENSG00000135824	RGS8	0.572695	0.668152	0.77206	0.374562	0.510834	0.199214	0	0.61521	0.409165	0.429113	0.504629	0.461795	0.438642	0.628244	0.536033	0	0	0	0.272752	0	0.723479	0.929728
ENSG00000215045	GRID2IP	0.572502	0	0	0.658473	0	0.780787	0	0	0	0	0	0	0	0	0	0	0	0	0	0	0	0.349364
ENSG00000163788	SNRK	0.571226	0.212058	0.40526	0.366464	0.514466	0.180173	0.212715	0.492814	0	0.00784276	0.173625	0	0.0667781	0.375045	0.295706	0	0	0	0	0.247384	0.348266	0.231458
ENSG00000177875	CCDC184	0.569385	0.641704	0.772049	0.420545	0.562948	0.01	0.438117	0.646994	0.432836	0.44276	0.478771	0.434009	0	0.834802	0.639753	0	0	0	0	0	0.610112	0.463983
ENSG00000100234	TIMP3	0.568375	0	0	0	0	0	0	0	0	0	0	0	0	0	0	0	0	0	0	0	0	0
ENSG00000255112	CHMP1B	0.568152	0.39395	0.3836	0.658389	0.0373434	0.322089	0.397732	0.358923	0.333124	0.301873	0.388132	0.277184	0.324604	0.356149	0.399496	0.375371	0.136155	0.397075	0.355025	0.170418	0.403111	0.476282
ENSG00000159173	TNNI1	0.567212	0	0	0	0	0	0	0	0	0	0	0	0	0	0	0	0	0	0	0	0	0
ENSG00000166862	CACNG2	0.566408	0.369049	0.585626	0.447322	0.249426	0	0.417907	0.594758	0.31367	0.318974	0.436631	0.448989	0.357679	0.599473	0.555268	0.0803534	0.0344332	0.336814	0.444383	0.193862	0.467898	0.622235
ENSG00000167680	SEMA6B	0.565824	0.549291	0.565867	0.415557	0.389975	0.481163	0.217219	0.43006	0.389617	0.341825	0.476014	0.322513	0.284814	0.430104	0.51707	0.560646	0.412765	0.511204	0.6205	0.651294	0.421828	0.38254
ENSG00000161682	FAM171A2	0.565086	0.269601	0.392042	0.500661	0.260529	0	0.313406	0.288864	0.122755	0.14063	0.35708	0.0281546	0.0799465	0.26366	0.365728	0.579622	0.411591	0.433793	0.565319	0.693543	0.23169	0.514491
ENSG00000205002	AARD	0.564791	0.372534	0.402843	0.367122	0.270293	0	0	0.397056	0.467693	0.614773	0.438328	0.409239	0	0.410641	0.120422	0.0284002	0.286758	0.307303	0.00316456	0	0.242301	0
ENSG00000136643	RPS6KC1	0.563382	0.289591	0.266099	0.281204	0.128716	0	0.033661	0.239102	0.292798	0.0930444	0.3256	0.469609	0.0280749	0.283998	0.476879	0.440739	0.191103	0.337793	0.254258	0.293003	0.309262	0.186115
ENSG00000188167	TMPPE	0.561682	0.0130329	0.450478	0.275485	0	0.464939	0.395943	0.586632	0.121914	0	0.307427	0	0	0.276375	0.426096	0.0123002	0	0.0392857	0.187766	0.280771	0.277593	0.352537
ENSG00000073150	PANX2	0.56149	0.530874	0.723368	0.653472	0.719895	0.611569	0.339327	0.64818	0.113939	0.0681076	0.151981	0.397842	0.306434	0.722512	0.48677	0.394597	0.120608	0.376269	0.504145	0.440505	0.455006	0.423452
ENSG00000185477	GPRIN3	0.561077	0.465703	0.520073	0.589041	0.336073	0.129551	0	0.583934	0.157989	0	0.318741	0.047596	0	0.390309	0.749894	0	0.133918	0.279723	0.532689	0.74685	0.862516	0
ENSG00000140323	DISP2	0.560099	0.636555	0.650125	0.588205	0.468303	0.372933	0.464465	0.64421	0.560258	0.476438	0.588291	0.480681	0.475876	0.625743	0.66068	0.433168	0.434225	0.421975	0.468513	0.523362	0.536678	0.475218
ENSG00000142046	TMEM91	0.559783	0.637426	0.557361	0.542403	0.447892	0	0.0382789	0.603664	0.738592	0.579346	0.705534	0.562504	0.632787	0.580821	0.682876	0.291905	0.311809	0.471987	0	0.447969	0.574518	0
ENSG00000198722	UNC13B	0.55826	0	0	0	0	0	0	0	0.229045	0.60646	0	0	0.281857	0	0	0.835078	0.453447	0.398271	0.424744	0.563736	0	0
ENSG00000100285	NEFH	0.55736	0.471704	0.762187	0.441926	0.683619	0.463286	0.442782	0.682161	0.0199501	0.435745	0.33981	0	0.462342	0.80723	0.416124	0.162479	0	0.066952	0.388733	0.565803	0.55019	0.376634
ENSG00000175745	NR2F1	0.557155	0	0	0	0	0	0	0	0	0	0.0117437	0	0	0	0	0.577435	0.434318	0.360055	0.486145	0	0	0.355548
ENSG00000163449	TMEM169	0.556178	0.533507	0.390825	0.0977075	0.247639	0	0	0.332405	0.121472	0.427432	0.166693	0.263252	0.0702372	0.445327	0.370011	0.312093	0.270634	0.292965	0.107709	0.360654	0.418183	0.374241
ENSG00000114948	ADAM23	0.555407	0.31885	0.575832	0.607842	0.329534	0.384612	0.418796	0.580119	0.0534721	0.34186	0.182784	0.06226	0.576918	0.516746	0.248601	0.360815	0.0942171	0.0435434	0.367386	0.549074	0.425367	0
ENSG00000145888	GLRA1	0.555314	0.459949	0.392019	0.808923	0.559904	0.574491	0.458573	0.617759	0	0.307335	0.483366	0.436433	0.393919	0.66949	0.485719	0	0	0	0	0	0.157125	0
ENSG00000168538	TRAPPC11	0.55519	0.159457	0.539188	0.167124	0.251434	0	0.470997	0.34071	0.146191	0.0147173	0.273076	0	0.2028	0.291206	0.403975	0.319425	0.124451	0.381452	0.31731	0.332109	0.158419	0.133848
ENSG00000154096	THY1	0.554826	0.562344	0.593032	0.42035	0.48413	0.326062	0.30836	0.625116	0.44559	0.503981	0.45487	0.408206	0.578616	0.613376	0.494378	0.448133	0.315707	0.385444	0.508445	0.60247	0.475743	0.458331
ENSG00000118242	MREG	0.554824	0.334334	0.422936	0.279088	0.918231	0.373894	0.466005	0.319664	0.460637	0.537862	0.299964	0.307817	0	0.520486	0	0	0.0438532	0	0.0349205	0	0.196309	0
ENSG00000198477	NA	0.55452	0.307293	0.482888	0.573295	0.170403	0	0.370661	0.467317	0.378987	0.0962587	0.215496	0.263875	0.186533	0.342389	0.521233	0.116305	0	0.100637	0.335288	0.125595	0.391758	0
ENSG00000138376	BARD1	0.554414	0	0	0.245981	0	0	0	0.0782579	0	0	0	0	0	0.130543	0	0	0	0	0	0	0	0
ENSG00000109762	SNX25	0.553632	0.435985	0.442029	0.141307	0.408826	0	0.335891	0.321244	0.223342	0.395611	0.351337	0.259056	0.304953	0.407201	0.385204	0.18751	0	0	0.174609	0.648271	0.422114	0.293616
ENSG00000165868	HSPA12A	0.553588	0.455738	0.587868	0.246847	0.42731	0.434042	0.170234	0.554432	0.398699	0.456802	0.416167	0.149274	0.426635	0.590158	0.431527	0.579613	0.42551	0.443784	0.629145	0.610742	0.442294	0.397043
ENSG00000101680	LAMA1	0.553188	0.595342	0	0	0.975003	0	0	0	0	0	0	0	0	0	0	0	0	0	0	0	0.0830404	0
ENSG00000117632	STMN1	0.553068	0.348974	0.245682	0	0.34796	0	0	0	0	0	0	0	0	0	0	0	0	0	0	0	0.409976	0.50164
ENSG00000070770	CSNK2A2	0.552259	0	0.289705	0.218172	0.249525	0	0.21376	0.0448029	0	0.123537	0	0	0	0.295485	0.0402685	0.29647	0	0.038875	0.340154	0.296847	0.289713	0.236563
ENSG00000011347	SYT7	0.55222	0.31448	0.389749	0.296224	0.478819	0.279554	0	0.417952	0.00700173	0.43612	0.287842	0.223716	0.47747	0.489153	0.376309	0.62133	0.411922	0.475889	0.577185	0.661147	0.315535	0
ENSG00000178662	CSRNP3	0.55141	0.595189	0.542512	0.471883	0.218067	0	0.395859	0.50463	0.437483	0.448291	0.473091	0.499162	0.424811	0.581196	0.458668	0.266665	0.378415	0.372757	0.379066	0.433462	0.558048	0.439785
ENSG00000174738	NR1D2	0.551353	0.574096	0.619047	0.433618	0	0.381958	0.218878	0.462878	0.215502	0.502966	0.216641	0.0129255	0.587328	0.562421	0.317205	0.0589267	0.0373074	0.104573	0	0.292276	0.410246	0.135223
ENSG00000182256	GABRG3	0.551174	0.348836	0.249191	0.423812	0	0	0	0.390203	0.378643	0	0.362939	0.218312	0	0.169567	0.372646	0.160667	0.448567	0.356619	0	0.612331	0.356557	0.148467
ENSG00000163814	CDCP1	0.550036	0	0	0	0	0	0	0	0.319344	0.644185	0	0	0.89861	0	0	0	0	0.676246	0	0.697675	0	0
ENSG00000146373	RNF217	0.549933	0.0148515	0.231933	0.355416	0	0	0.612213	0.130801	0.00383656	0	0.142155	0	0	0.0145988	0	0.514861	0.238031	0.456316	0.0282602	0.485915	0.260573	0.344179
ENSG00000055813	CCDC85A	0.548855	0.411182	0.360453	0.378435	0	0.344957	0.428205	0.392246	0.40189	0.456963	0.195292	0.196233	0.355993	0.334114	0.238641	0.191391	0	0.307551	0.345022	0.391979	0.320936	0.0644839
ENSG00000143603	KCNN3	0.548388	0.0720689	0.40402	0	0	0	0.616446	0	0	0	0.19605	0	0	0	0	0.0342369	0.0838738	0.0515693	0.00250221	0	0.326753	0
ENSG00000152932	RAB3C	0.547128	0.535951	0.542231	0.373909	0	0.414257	0.357515	0.366556	0.430187	0.467948	0.308845	0.282932	0.313624	0.595707	0.598576	0.416226	0.383722	0.514992	0.391719	0.58254	0.503652	0.576568
ENSG00000017373	NA	0.546966	0.153314	0.414274	0.246243	0.252016	0.155908	0.215116	0.214588	0	0	0	0	0.096992	0.331551	0.267892	0.329797	0.196999	0.336772	0.332184	0.331315	0.422148	0.332711
ENSG00000196935	SRGAP1	0.544811	0.271804	0.19601	0	0.326977	0	0.501402	0.0856155	0	0.3083	0.0156426	0	0	0.215276	0	0	0	0	0	0	0.317016	0.339924
ENSG00000107282	APBA1	0.544797	0.37159	0.196101	0	0.566186	0	0.230318	0.422442	0.398698	0.66637	0.285288	0.0863006	0.240895	0.369402	0.296816	0.174389	0.11837	0.362709	0.331147	0.0954386	0.239595	0.579378
ENSG00000160191	PDE9A	0.544665	0.203052	0.243341	0	0.418973	0.187589	0.0817878	0	0	0	0	0	0	0.104789	0	0	0	0	0	0.268716	0.16243	0
ENSG00000135436	FAM186B	0.543044	0.0767717	0.278339	0	0.655084	0	0.167053	0.161459	0.563014	0.253319	0	0.156049	0	0.156727	0.809016	0.110624	0	0.66956	0	0.168319	0.569658	0.0910972
ENSG00000164659	KIAA1324L	0.541675	0.355036	0.253423	0.589481	0	0	0.325601	0.33069	0.357919	0.371557	0.179935	0	0.302112	0.056091	0.264637	0	0	0	0	0	0.256486	0
ENSG00000152910	CNTNAP4	0.541441	0.549874	0.638781	0.570066	0.528274	0.525128	0.0286999	0.41567	0.391879	0.37895	0.584228	0.393838	0	0.423503	0.593584	0	0	0.366337	0	0	0.528515	0.882317
ENSG00000139190	VAMP1	0.54124	0.640679	0.829874	0.714969	0.643842	0.666914	0.387877	0.906924	0.434324	0.483901	0.680379	0.479042	0.790656	0.908906	0.641507	0	0	0	0.0458208	0.323002	0.479618	0.274921
ENSG00000137965	IFI44	0.540969	0.403003	0	0	0	0	0.181568	0	0	0	0	0	0	0	0	0.0660944	0	0	0	0.0968777	0	0
ENSG00000198910	L1CAM	0.540816	0.17272	0.31882	0.39529	0.412885	0.109441	0.42302	0.361466	0.344497	0.386991	0.357851	0.307695	0	0.322477	0.279443	0.40593	0.383884	0.445961	0.373655	0.366232	0.370406	0.408514
ENSG00000048471	SNX29	0.540178	0	0	0	0	0	0	0	0	0	0	0	0	0	0	0	0	0	0	0	0	0
ENSG00000101463	SYNDIG1	0.540038	0.192507	0.395277	0.0233978	0.711514	0	0	0.392715	0.0743973	0.372686	0.198616	0.0235475	0	0.360508	0.154151	0.0471803	0	0	0.339561	0.372991	0.275295	0.239771
ENSG00000175664	TEX26	0.538885	0	0	0	0	0	0.449084	0	0.478312	0	0.0564587	0.0944255	0	0	0	0	0	0	0	0	0	0
ENSG00000189195	AC104836.1	0.538838	0.00456621	0	0	0	0	0	0.00362647	0	0	0	0.119048	0	0	0	0	0	0	0	0	0	0
ENSG00000125966	MMP24	0.538485	0.336697	0.444618	0.299437	0.381216	0.14457	0	0.267585	0.148472	0.304376	0.115159	0	0	0.388657	0.407522	0.301097	0.198645	0.124828	0.464155	0.227007	0.343605	0.18979
ENSG00000064763	FAR2	0.538422	0.528546	0.00149282	0.190347	0	0	0.0867342	0.0768016	0	0.428812	0.202902	0	0	0.246857	0	0.205686	0.481579	0.339817	0	0.830963	0.138923	0
ENSG00000110427	KIAA1549L	0.537782	0.389461	0.497477	0	0.53284	0	0	0.655121	0.175172	0.409827	0.224654	0	0.519498	0.347984	0.0209575	0.534611	0.390954	0.622349	0.79392	0.822171	0.370475	0.0997954
ENSG00000171587	DSCAM	0.537481	0.486864	0.593311	0.512449	0.35924	0	0.379347	0.588039	0.464165	0.426568	0.415274	0.243266	0.0993316	0.627708	0.609766	0.0319575	0.0124741	0.15974	0.415595	0.628505	0.548102	0.581973
ENSG00000185818	NAT8L	0.537176	0.537665	0.682833	0.536916	0.519581	0.401017	0.308799	0.688001	0.383241	0.439699	0.456677	0.376526	0.742538	0.682977	0.583113	0.433788	0.20187	0.192429	0.401816	0.643262	0.507916	0.424029
ENSG00000149418	ST14	0.536883	0	0.33029	0	0.244904	0	0	0	0	0.416232	0.544598	0	0	0	0	0	0	0	0	0	0	0
ENSG00000166260	COX11	0.536475	0.352012	0.379687	0.133829	0.37248	0	0	0.532067	0.319708	0.413954	0.395228	0.490167	0.324891	0.572012	0.572677	0.197071	0	0.13828	0.156469	0.142762	0.347321	0.285713
ENSG00000165434	PGM2L1	0.534257	0.44202	0.445659	0.424574	0.437686	0.320746	0.404363	0.396927	0.381989	0.31139	0.43341	0.388056	0.118382	0.426534	0.458546	0.552077	0.465137	0.561048	0.605536	0.610542	0.440153	0.458205
ENSG00000179820	MYADM	0.534155	0.410976	0.568846	0	0.360953	0	0	0.502527	0.374253	0.388489	0.325874	0.299199	0.304006	0.534811	0.356457	0.297517	0.185058	0.421018	0.322136	0.589707	0.424395	0
ENSG00000262484	CCER2	0.531678	0.887494	0.943565	0	0.0171965	0	0	0.919167	0.393179	0.271575	0.879537	0.672894	0.989939	0.944206	0.871619	0	0	0	0	0	0.160655	0
ENSG00000196296	ATP2A1	0.531499	0.532544	0	0	0	0	0	0	0	0.790887	0	0	0	0.100454	0	0	0	0	0.02925	0.211066	0	0
ENSG00000205693	MANSC4	0.530857	0.0399606	0	0	0	0	0	0	0	0	0.00917939	0	0.67199	0	0.143924	0	0.48686	0	0	0.0741302	0.104131	0.141755
ENSG00000205090	TMEM240	0.530602	0.289187	0.462844	0.420087	0.455311	0	0	0.413623	0.395308	0.333437	0.34957	0.242035	0.331927	0.570809	0.391498	0.423219	0.0434257	0.288713	0.254244	0.503922	0.368907	0.397819
ENSG00000177301	KCNA2	0.529991	0.541749	0.66486	0.235764	0.445732	0.264457	0	0.657027	0.172328	0.508677	0.316285	0.304309	0.632824	0.648456	0.342456	0.0893424	0.099908	0.314064	0.282377	0.598726	0.455879	0.338522
ENSG00000138944	KIAA1644	0.528994	0.16666	0.0481433	0	0	0	0.0609748	0.0937032	0.328095	0	0	0.311749	0	0.053518	0.0817458	0.534914	0.52589	0.227546	0.335644	0	0.335935	0.174171
ENSG00000087152	ATXN7L3	0.528209	0.363432	0.535186	0.341546	0.456817	0.382796	0.335962	0.406116	0.119875	0.379591	0.323193	0.0326977	0.138369	0.555127	0.413904	0.427917	0.13797	0.382401	0.437299	0.529239	0.403307	0.521537
ENSG00000085382	HACE1	0.527536	0.174955	0.1935	0.218587	0	0.0882255	0.253181	0.120612	0.125237	0.0322424	0.0177565	0	0.385142	0.187085	0.243773	0.689827	0.475001	0.299501	0.20562	0.28948	0.236088	0
ENSG00000123999	INHA	0.526419	0.412269	0.227212	0.107118	0.466698	0	0	0.397662	0.376614	0.437065	0.181675	0.328071	0.453677	0.292294	0.227738	0.573697	0.297538	0.363508	0.381824	0.581354	0.46119	0.302529
ENSG00000106070	GRB10	0.526345	0.588017	0.447008	0.674314	0.298157	0	0.670516	0.430952	0.611426	0.422174	0.615413	0.459775	0.0885695	0.319998	0.653298	0	0	0	0	0	0.454226	0.466399
ENSG00000138641	HERC3	0.526041	0.364605	0.333694	0.595086	0.359646	0.141945	0.363792	0.363102	0.207667	0.375323	0.338813	0.157646	0.135963	0.372069	0.251516	0.491122	0.427056	0.519541	0.415379	0.634095	0.383895	0.289044
ENSG00000128159	TUBGCP6	0.524594	0.564938	0.5849	0.473677	0.335628	0.567314	0.20887	0.305935	0.220188	0	0.224236	0.374862	0.267741	0.24298	0.237722	0.198536	0	0.109472	0.1472	0.217727	0.181573	0.260201
ENSG00000203668	CHML	0.524283	0.710391	0.402188	0.233453	0.245333	0	0.364662	0.385439	0	0	0.154922	0	0	0.624131	0.392749	0	0.148363	0.385554	0	0.525128	0.410143	0
ENSG00000133059	DSTYK	0.523565	0	0.293483	0.208845	0.299674	0	0.335214	0.374803	0	0.148762	0.0640737	0.0928462	0.0915775	0.340305	0.256853	0.0288116	0.0196022	0.0673947	0.336676	0.0692775	0.348975	0.212967
ENSG00000102359	SRPX2	0.523047	0	0.563716	0	0	0	0	0	0	0	0	0	0	0.689122	0	0	0	0.172212	0	0.463832	0.0413005	0
ENSG00000157617	C2CD2	0.522901	0	0.118329	0	0	0.0862921	0.208569	0	0	0	0	0	0	0.126139	0	0	0	0	0	0.0625114	0.063754	0.167709
ENSG00000144642	RBMS3	0.522285	0.463516	0.302726	0.548306	0.229608	0.467835	0.475178	0.436496	0.0215327	0.188465	0	0.098989	0	0.36024	0.345568	0	0	0	0	0	0.197175	0.485879
ENSG00000204930	FAM221B	0.521869	0	0.126815	0.27537	0.415444	0	0.00255007	0.239986	0	0.17716	0.50924	0	0.0679862	0.0694111	0.193455	0.18823	0	0.186996	0.0217103	0.0732525	0	0
ENSG00000113248	PCDHB15	0.52168	0.37801	0.220199	0.0398657	0.112142	0	0	0.483938	0.0395467	0.404101	0	0.0326128	0.228202	0.531256	0.27617	0.254638	0	0	0	0.0736691	0.215786	0.102056
ENSG00000162426	SLC45A1	0.52135	0.358078	0.480881	0.214501	0.402681	0.140593	0.42438	0.557655	0.393571	0.375171	0.437008	0	0.388086	0.557936	0.4366	0.379936	0.112017	0.370838	0.349882	0.566703	0.449148	0.437178
ENSG00000175497	DPP10	0.518529	0.644401	0.431784	0.646352	0.113022	0.347137	0.0201479	0.456489	0.410508	0	0.416122	0.394111	0.100602	0.401107	0.512983	0.538369	0.378466	0.447289	0	0.636576	0.453912	0.319922
ENSG00000159147	DONSON	0.518331	0.41804	0.0858572	0.213792	0.0815511	0	0.225533	0.356774	0.241824	0.180025	0.218971	0.289318	0.312467	0.23807	0.112063	0.262184	0.057046	0	0.160871	0.29925	0.137783	0.13863
ENSG00000173114	LRRN3	0.517809	0.494413	0.212551	0.186525	0.225749	0	0	0.0456668	0.0124688	0	0	0.215205	0	0.12684	0.37338	0.412647	0.351582	0.358882	0.389755	0.326602	0.260832	0.404359
ENSG00000128510	CPA4	0.51778	0.172617	0.158793	0	0	0	0.605954	0.150073	0	0	0.1143	0	0	0	0	0	0	0.201364	0	0	0	0.0641387
ENSG00000123570	RAB9B	0.516493	0.655165	0.568838	0.783432	0.126754	0.397466	0.548057	0.606449	0.650493	0.540279	0.630377	0.476971	0.410819	0.458408	0.639218	0.301555	0.14735	0.410948	0.451625	0.274579	0.582863	0.0256858
ENSG00000163810	TGM4	0.516467	0	0	0.292275	0	0	0	0.0703975	0.00265252	0.511204	0	0	0.723033	0	0	0.779559	0	0	0.0946791	0.0183929	0	0
ENSG00000089091	DZANK1	0.515665	0.684814	0.709554	0.662069	0.465592	0.444232	0.466659	0.66651	0.57802	0.596142	0.601216	0.540688	0.542225	0.678366	0.679274	0.367328	0.326023	0.429275	0.320996	0.384197	0.584407	0.468291
ENSG00000138795	LEF1	0.515108	0.26712	0	0	0	0	0	0.564464	0	0	0.377107	0.958346	0	0.762654	0.0447761	0	0	0	0	0	0	0
ENSG00000139890	REM2	0.513852	0.365263	0.15856	0	0.427754	0	0	0.0954287	0.482867	0	0.347121	0.298413	0.66287	0	0	0	0	0	0.829018	0.341691	0	0
ENSG00000165023	DIRAS2	0.512607	0	0.355511	0.0115279	0.00748658	0.0318545	0.242385	0.38011	0.0210531	0.504783	0.0231586	0.302126	0	0.375058	0.262079	0.543556	0.449297	0.452606	0.627028	0.724406	0.148804	0.245815
ENSG00000002746	HECW1	0.512186	0.507702	0.595672	0.682082	0.392226	0.230912	0.200922	0.629269	0.42577	0.419946	0.444972	0.381455	0.379314	0.447933	0.452722	0.386569	0.272911	0.437938	0.405537	0.414098	0.389293	0.323257
ENSG00000091137	SLC26A4	0.511162	0	0	0	0	0	0	0	0	0	0	0	0	0	0	0.658742	0.866709	0.895805	0.996246	0.943921	0	0
ENSG00000133101	CCNA1	0.510792	0.216185	0	0	0	0	0	0	0	0.828696	0	0	0	0	0	0	0	0.0902056	0.387667	0.400743	0.566191	0
ENSG00000113657	DPYSL3	0.5103	0.338257	0.387738	0.24475	0.435383	0.259884	0.0991141	0.190176	0.291401	0	0.153196	0.141147	0	0.352483	0.296142	0.118737	0	0.205104	0.402479	0.233006	0.399536	0
ENSG00000158813	EDA	0.508792	0	0	0	0	0	0	0	0	0	0.226677	0	0	0	0.0497647	0.699518	0	0	0.140433	0.860544	0.137239	0.184941
ENSG00000001461	NIPAL3	0.507733	0.383307	0.543646	0.376797	0.401788	0	0.256127	0.403975	0.369603	0.22044	0.447741	0.381871	0.144251	0.430328	0.471846	0.37654	0.38052	0.405952	0.110205	0.41289	0.453626	0.391672
ENSG00000170390	DCLK2	0.506942	0.221589	0.343021	0.136048	0.296653	0.0999043	0	0.257935	0	0	0.0221721	0	0	0.475527	0.214384	0.246336	0.0336247	0.0514168	0.568163	0.279739	0.368238	0.291516
ENSG00000120254	MTHFD1L	0.506489	0.196842	0.239075	0.276362	0	0	0	0.0808654	0.166184	0	0	0	0	0.0248616	0	0	0.128312	0.0463203	0.153151	0	0.0501714	0.44069
ENSG00000107130	NCS1	0.505409	0.417845	0.626501	0.468896	0.408186	0.343925	0.423199	0.499454	0.280132	0.398374	0.403721	0.245778	0.270727	0.638621	0.497087	0.398772	0.213361	0.440127	0.512538	0.454888	0.510751	0.387455
ENSG00000130054	FAM155B	0.504619	0.478466	0.741203	0.470511	0	0.055618	0	0.239298	0	0	0.354762	0	0.13854	0.562679	0.246952	0.371828	0.0899175	0.330325	0.563738	0.486908	0.358551	0.260282
ENSG00000196141	SPATS2L	0.503804	0	0.104312	0	0	0	0	0.0149991	0.321966	0.0302091	0	0.163187	0	0	0	0	0	0	0	0	0.177714	0.225563
ENSG00000071794	HLTF	0.503443	0.0320772	0.238254	0.0902729	0	0	0.0438613	0.131361	0.418923	0	0.255535	0.179764	0.242855	0.146274	0.195303	0.0679471	0	0	0.0644483	0.131767	0.098196	0.328324
ENSG00000130032	PRRG3	0.503305	0.480126	0.592002	0.657559	0	0.334387	0.264617	0.598296	0.610052	0.406133	0.59906	0.407859	0.290567	0.395669	0.425211	0.40139	0	0.283292	0.22352	0.367858	0.365581	0.150633
ENSG00000163013	FBXO41	0.502794	0.474705	0.495451	0.5735	0.397859	0	0.366839	0.412388	0.371872	0.342836	0.377998	0.289292	0.463694	0.538257	0.382133	0.594762	0.434563	0.536409	0.536297	0.64432	0.532881	0.42572
ENSG00000117155	SSX2IP	0.502507	0.409274	0.38126	0.348343	0	0	0.308814	0.439073	0.415675	0.447847	0.422714	0.424293	0.125735	0.393025	0.500901	0.518591	0.217778	0.442122	0.514015	0.356805	0.41535	0.160324
ENSG00000160714	UBE2Q1	0.501394	0.229817	0.277591	0.547191	0.222124	0.271351	0.419763	0.304048	0.0216286	0.107004	0.240379	0.130722	0.0910428	0.382523	0.312736	0.208238	0.214472	0.320489	0.379746	0.332061	0.347705	0.363173
ENSG00000196876	SCN8A	0.501147	0.354638	0.625909	0.311569	0.404786	0.186712	0.0030083	0.636479	0.0656532	0.382967	0.220412	0.117865	0.565189	0.621814	0.384673	0.618087	0.399497	0.417919	0.600931	0.740629	0.415403	0.402486
ENSG00000000005	TNMD	0.500626	0.39007	0.127236	0	0.182786	0	0	0.88128	0	0	0.16545	0.634419	0	0.494844	0.431308	0	0	0	0	0.857244	0.617489	0.104788
ENSG00000091490	SEL1L3	0.500527	0	0	0	0	0	0	0	0	0.287715	0	0	0.40113	0	0	0.358436	0.117141	0.416644	0	0.837603	0	0.931263
ENSG00000176490	DIRAS1	0.500136	0.45445	0.657721	0.422751	0.471503	0.558243	0.325091	0.52966	0.345016	0.424322	0.337007	0.245035	0.143717	0.675419	0.497077	0.334511	0.169225	0.281102	0.326977	0.440869	0.635271	0.616074
ENSG00000173145	NOC3L	0.4999	0.0454888	0.290898	0	0	0	0.00445104	0.20512	0.207865	0.108852	0	0.00578309	0.260061	0.256359	0.0395356	0	0	0.11522	0.147512	0	0.175665	0
ENSG00000137103	TMEM8B	0.499876	0.337812	0.28843	0.225968	0.129688	0	0.206881	0.298486	0.357915	0.0684776	0.265286	0.0722421	0.129476	0.320855	0.348026	0.485247	0.337387	0.5197	0.481931	0.602053	0.353011	0.282261
ENSG00000169862	CTNND2	0.499622	0.332643	0.399651	0.233207	0	0.115223	0.344429	0.289567	0.180053	0.250651	0.324046	0.345035	0.242364	0.377427	0.321525	0.408214	0.376345	0.451063	0.356626	0.455939	0.39044	0.591417
ENSG00000103042	SLC38A7	0.498766	0	0.122225	0.522599	0	0	0.29786	0	0	0.172657	0	0	0	0.141277	0.24534	0.339485	0	0.256525	0.327707	0.144153	0	0.35353
ENSG00000104331	IMPAD1	0.498655	0.302613	0.38881	0.56647	0.0425444	0.164634	0.357247	0.319022	0.15234	0.132068	0.291966	0.194587	0.104278	0.375541	0.435601	0.162343	0	0.131457	0.142093	0.207036	0.369998	0.407521
ENSG00000135622	SEMA4F	0.498523	0.24375	0.22491	0.35272	0.389304	0	0.364093	0.465501	0.165317	0.104809	0.402928	0.165928	0.349196	0.278119	0.0846442	0.418232	0.530838	0.456736	0.375497	0.432492	0.0337933	0
ENSG00000161996	WDR90	0.497516	0	0	0	0	0	0.0285145	0.146365	0	0.436343	0	0	0.0613475	0	0	0.165986	0.344613	0.155576	0.0293641	0.666629	0	0
ENSG00000158158	CNNM4	0.497067	0.234795	0.0572207	0	0	0	0.205799	0.0423092	0.214412	0	0	0	0	0.0888928	0	0.00850047	0	0	0.553727	0.285206	0.0350937	0.189292
ENSG00000129473	BCL2L2	0.496862	0.484492	0.474364	0.131567	0.398032	0	0.081148	0.399945	0.302049	0.378172	0.32227	0.288785	0.257859	0.430404	0.404683	0.272258	0.0955392	0.319913	0.373526	0.32217	0.425583	0.421802
ENSG00000182771	GRID1	0.495653	0.360548	0.420783	0.279023	0	0.0667416	0.408299	0.330986	0.432218	0.467032	0.574217	0.0516413	0.25918	0.466804	0.282056	0.437993	0	0.403416	0.480589	0.587155	0.575519	0.384883
ENSG00000187323	DCC	0.495431	0.258963	0	0.193688	0	0	0.161112	0	0.159881	0.398135	0.0211623	0.245563	0.779374	0	0.0829071	0.0568395	0	0	0.580687	0	0.234259	0
ENSG00000167528	ZNF641	0.495412	0.259031	0.249358	0.181267	0	0	0	0.114442	0.286884	0.0429705	0.217125	0.19484	0	0.218661	0.146736	0	0.109744	0.0391775	0	0	0.215444	0.457479
ENSG00000135749	PCNX2	0.495154	0.350182	0.589424	0.342924	0.408771	0.461288	0	0.614999	0	0.320708	0.124307	0.122533	0.527167	0.482097	0.017418	0.61772	0.205781	0.391807	0.603458	0.904258	0.257752	0.213001
ENSG00000101333	PLCB4	0.494586	0.664609	0.565642	0.412949	0.541364	0.139842	0.137128	0.624516	0.410353	0.471265	0.380725	0.447396	0.479318	0.593867	0.434184	0	0	0	0	0.2562	0.426786	0.139287
ENSG00000147251	DOCK11	0.494548	0	0.146553	0.0930037	0	0	0.198224	0	0	0	0	0	0	0	0	0	0	0	0	0	0	0
ENSG00000175928	LRRN1	0.494545	0	0	0	0.530941	0.208722	0	0	0	0	0	0	0	0	0	0.167819	0	0	0	0	0	0
ENSG00000122025	FLT3	0.493207	0.879474	0.95135	0.25525	0.388083	0	0	0.908937	0.327751	0.38354	0.33171	0	0.912016	0.900224	0.633742	0	0	0	0.149424	0.479444	0.62086	0.204547
ENSG00000197381	ADARB1	0.492731	0.647947	0.593123	0.363186	0.643115	0.332679	0.0401495	0.51212	0.305434	0.544224	0.340813	0.285892	0.453482	0.639517	0.351081	0.487282	0.271364	0.143187	0.443763	0.11561	0.468587	0.539209
ENSG00000108272	NA	0.49152	0	0.0543044	0	0.577453	0	0	0.301299	0	0.368226	0	0.016022	0	0	0	0	0	0	0.077826	0	0	0
ENSG00000183473	NA	0.491509	0.594566	0.507425	0.0940953	0.879022	0	0	0.350539	0.256794	0.676155	0	0	0	0.182869	0.139368	0.901289	0.935863	0.735527	0.962532	0.146189	0	0
ENSG00000151079	AC005833.1	0.490474	0.637862	0.626416	0.221032	0.317582	0.318946	0	0.595249	0.219337	0	0.332457	0.343541	0.313575	0.494967	0.593593	0.28654	0.312814	0.392924	0	0.246442	0.511441	0.419248
ENSG00000143450	OAZ3	0.490035	0	0	0	0	0	0.0973201	0	0.354711	0	0	0	0.687121	0	0	0.0666327	0.0681014	0	0	0	0	0
ENSG00000068615	REEP1	0.489082	0.406949	0.420082	0.541114	0.398818	0.271792	0.543721	0.387608	0.312302	0.33364	0.362283	0.337328	0.184182	0.414015	0.430694	0.404935	0.369301	0.399587	0.347132	0.462092	0.450107	0.276534
ENSG00000131351	HAUS8	0.488877	0.425101	0.269884	0	0.307837	0	0	0.217349	0.042591	0	0.0279243	0	0	0.224147	0.339887	0	0	0	0	0	0.261817	0.125372
ENSG00000164304	CAGE1	0.487428	0	0.0553041	0.509049	0	0.913198	0.321205	0	0.418055	0.222102	0.0522008	0	0.803412	0	0.0335516	0.16454	0.207248	0	0.119089	0.137764	0	0.244824
ENSG00000182870	GALNT9	0.4872	0.332741	0.287978	0	0.530912	0	0	0.458839	0.237351	0.210955	0.101205	0	0.315938	0.32836	0.314854	0.407772	0.37776	0.648661	0.517874	0.933615	0.287647	0
ENSG00000211456	SACM1L	0.486944	0.4	0.598612	0.590201	0.0473214	0.314326	0.455043	0.394347	0	0.106144	0.295225	0.122245	0.2331	0.403656	0.337061	0	0	0.0506813	0	0.215591	0.427048	0.134566
ENSG00000108018	SORCS1	0.486592	0	0.026964	0.0825063	0.310468	0	0.546979	0	0	0.0234314	0.216006	0.364588	0	0.0824394	0.0278968	0.0929587	0	0	0	0.837993	0.213536	0.12789
ENSG00000070182	SPTB	0.486243	0.487574	0.412777	0.566126	0.649965	0.351345	0	0.653569	0.091811	0.369727	0.413482	0.149592	0.621122	0.542521	0.382641	0.400821	0	0	0.40806	0	0.319862	0
ENSG00000152128	TMEM163	0.486133	0.664707	0	0.515949	0	0	0.0525178	0.586027	0.783829	0.655601	0.785185	0.564417	0.66355	0	0	0	0	0	0	0.687733	0	0
ENSG00000140688	C16orf58	0.485767	0.0129265	0.33294	0.610687	0.16857	0.150337	0.139512	0.216632	0	0	0.395023	0	0	0.291007	0.542397	0	0	0	0.129387	0	0.277788	0.0290537
ENSG00000235156	TMEM30CP	0.485552	0.0150919	0	0	0	0	0	0.187887	0	0.496318	0	0	0.573213	0.0500277	0	0	0	0	0.114329	0.0663501	0.0475937	0.49294
ENSG00000144868	TMEM108	0.485527	0.290513	0	0.00141657	0	0	0	0.0396084	0.292202	0.228517	0.126123	0.0736499	0	0.0639694	0	0.163629	0	0.309445	0.50905	0.108263	0	0
ENSG00000075043	KCNQ2	0.485337	0.400332	0.47345	0.419791	0.358536	0.252906	0.291305	0.524713	0.429949	0.415712	0.483847	0.432147	0.448259	0.531751	0.48752	0.550078	0.427466	0.477298	0.651222	0.623895	0.454926	0.419064
ENSG00000128011	LRFN1	0.48466	0.339706	0.254141	0.325219	0.385903	0	0.304556	0.401164	0.361616	0.308959	0.394995	0.281192	0.308459	0.412957	0.374453	0.540961	0.429491	0.57516	0.534775	0.605102	0.335905	0.606346
ENSG00000164620	RELL2	0.483305	0.447717	0.560053	0.377525	0.596627	0.351852	0.351352	0.625642	0.389223	0.461729	0.427398	0.445694	0.417806	0.634633	0.505085	0.435005	0.299317	0.370137	0.454259	0.579811	0.511839	0.390303
ENSG00000140525	FANCI	0.482188	0	0	0	0.324357	0	0	0	0	0	0	0	0	0	0	0	0	0	0.224487	0	0	0
ENSG00000104918	RETN	0.481927	0	0	0	0	0	0	0	0.0371775	0	0	0	0.218782	0	0	0.938692	0.421277	0	0.562488	0.328753	0.694182	0
ENSG00000115687	PASK	0.480924	0	0	0.392264	0.140751	0	0	0.108253	0.104308	0.628668	0.202903	0.666379	0.0794966	0.113096	0.350768	0.0139455	0	0.0261905	0	0.0835461	0	0.451961
ENSG00000111490	TBC1D30	0.480819	0.164787	0.274026	0.331025	0.367684	0.311435	0.380889	0.299427	0.0745592	0.370298	0.179717	0.197617	0.393381	0.359704	0.148114	0.357368	0	0.214601	0.145092	0.5655	0.258336	0.904214
ENSG00000166448	TMEM130	0.480806	0.648933	0.660028	0.666724	0.438344	0.31362	0.475806	0.600087	0.587573	0.476823	0.640798	0.520097	0.454092	0.574792	0.67021	0.36829	0.354523	0.384861	0.26596	0.280055	0.558218	0.481777
ENSG00000174939	ASPHD1	0.480363	0.229259	0.399578	0	0.337021	0.0460674	0	0.363788	0.606574	0.401164	0.283579	0	0.316829	0.34354	0.185929	0.458892	0.281492	0.329823	0.323528	0.687893	0.621675	0.317106
ENSG00000082458	DLG3	0.479833	0.0621843	0.254624	0.000293083	0.340493	0	0.0994416	0.245561	0.00163054	0.295383	0.115188	0.00787049	0	0.323426	0.258451	0.696253	0.38903	0.555883	0.651173	0.60976	0.339137	0.437271
ENSG00000205683	DPF3	0.478739	0	0	0	0.665923	0.513359	0	0.0161163	0	0	0	0	0	0.101979	0	0	0	0	0.699155	0	0	0.231349
ENSG00000164077	MON1A	0.478487	0	0	0	0.148101	0	0	0.419771	0	0.00929705	0	0.185878	0	0.0554463	0	0	0	0	0.0169267	0.104467	0.0543987	0.192258
ENSG00000178602	OTOS	0.478451	0	0	0	0.892423	0	0	0	0	0	0	0	0	0	0	0	0	0	0.971914	0	0	0.310418
ENSG00000119946	CNNM1	0.478191	0.390104	0.352347	0.391243	0.292365	0.413123	0.288169	0.604481	0.386774	0.430043	0.398079	0.375515	0.571653	0.540918	0.41741	0.473448	0.396628	0.440334	0.512561	0.578327	0.412776	0.733671
ENSG00000203685	STUM	0.478173	0	0	0.128767	0	0	0	0	0.0425379	0.15906	0	0.316644	0	0	0	0.831378	0.787392	0.891553	0.841082	0.487236	0.177134	0
ENSG00000125841	NRSN2	0.478063	0.626857	0.593927	0.623084	0.417522	0.372282	0.476285	0.566321	0.580331	0.488491	0.588631	0.485576	0.476338	0.538376	0.651549	0.0467811	0	0.319136	0.182004	0.43192	0.535179	0.407625
ENSG00000138650	PCDH10	0.477753	0.324914	0.216655	0.307811	0	0.112069	0	0.205022	0.014531	0	0.0666573	0.551851	0	0.268339	0.167606	0.20683	0	0.144244	0	0.333431	0.341194	0.0262298
ENSG00000132182	NUP210	0.477745	0.439211	0.241441	0.195368	0.309287	0.044382	0	0.0131007	0.236192	0	0.327539	0	0.045728	0.318411	0.0293576	0.291841	0.278597	0.277037	0.287279	0.466736	0.525216	0.140394
ENSG00000165379	LRFN5	0.477629	0.516017	0.411915	0.412141	0.0813578	0.0462574	0	0.448727	0.54417	0.630781	0.425225	0.437011	0.403692	0.443666	0.517937	0.443367	0	0.457905	0.450897	0.533564	0.357485	0.452824
ENSG00000092068	SLC7A8	0.477456	0	0	0	0.405012	0	0.609171	0	0	0	0	0	0	0	0	0.347595	0.504504	0.644658	0.584852	0.633168	0	0.615284
ENSG00000188763	FZD9	0.47738	0	0	0	0	0.651037	0	0	0	0	0	0	0	0	0	0	0	0	0	0	0	0
ENSG00000219438	FAM19A5	0.477378	0.329557	0.36606	0.321365	0.0408406	0.0880992	0.310935	0.382912	0.369281	0.408177	0.346791	0.125736	0.105414	0.374748	0.403412	0.37271	0.0830076	0.201284	0.415047	0.0306339	0.36203	0.221411
ENSG00000183454	GRIN2A	0.477362	0.0202566	0.084297	0	0	0.206683	0	0.160614	0	0	0	0	0.409142	0.247663	0	0.734035	0.421615	0.538504	0.829747	0.848421	0	0
ENSG00000211455	STK38L	0.477255	0	0.115548	0.245034	0	0.106742	0.539187	0.234183	0	0	0	0	0	0.462981	0.0157471	0.0828251	0	0.117983	0	0.478631	0	0.111145
ENSG00000136193	SCRN1	0.47659	0.436166	0.427156	0.317736	0.316616	0.081476	0.408837	0.382836	0.395142	0.355062	0.397615	0.18534	0.0665107	0.40859	0.438652	0.324606	0.269347	0.328559	0.328814	0.00452175	0.455266	0.474339
ENSG00000175455	CCDC14	0.476531	0	0	0	0	0	0.114475	0	0.0732457	0	0	0	0	0	0	0	0.133771	0.169318	0	0.248795	0.0829962	0
ENSG00000101574	METTL4	0.47465	0	0	0	0	0	0	0	0	0	0	0	0	0	0	0.0150031	0	0	0	0	0	0.18504
ENSG00000167972	ABCA3	0.471686	0.245231	0.380342	0.246625	0.276619	0	0.323784	0.368332	0.0272876	0	0.352257	0	0.0937166	0.312414	0.361531	0.361385	0.257408	0.241064	0.405467	0.578984	0.348495	0.036315
ENSG00000131864	USP29	0.471487	0.639	0.547252	0.646699	0.416499	0.310578	0.596544	0.610164	0.659597	0.583575	0.643838	0.509741	0.436595	0.5035	0.629517	0	0	0	0.091584	0.172518	0.594065	0.469306
ENSG00000117906	RCN2	0.471249	0.127046	0	0.114832	0	0	0.18854	0	0.0466142	0.238041	0	0.0527899	0	0.0148453	0.0790797	0	0	0	0	0.0542203	0.0249469	0
ENSG00000171365	CLCN5	0.470994	0.502207	0.430777	0.676943	0.382678	0.295309	0.686248	0.443069	0.0575373	0.0176704	0.40484	0.384151	0	0.453381	0.632162	0	0	0	0	0	0.441953	0
ENSG00000182698	RESP18	0.470491	0.619578	0.49041	0.433935	0.463522	0	0.39132	0.487745	0.621479	0.473729	0.516383	0.483549	0.44401	0.474611	0.489266	0	0.379949	0.137296	0.247408	0.28852	0.476491	0.46562
ENSG00000108797	CNTNAP1	0.470129	0.445828	0.601393	0.545114	0.632796	0.429426	0.126547	0.66809	0.410071	0.48009	0.557677	0.42979	0.573207	0.672388	0.447247	0.408767	0.160937	0.381907	0.490738	0.699037	0.46227	0.442836
ENSG00000099364	FBXL19	0.469511	0.212504	0.420659	0.275317	0.33531	0.209043	0.113348	0.354324	0.279251	0.109429	0.323693	0.174544	0.218454	0.429176	0.340396	0.472482	0.376388	0.250804	0.394158	0.485767	0.376876	0.388413
ENSG00000170899	GSTA4	0.468856	0	0.353797	0.266743	0	0	0	0.247626	0	0	0.0394271	0	0.618523	0.0304135	0.623515	0	0	0.233355	0.173349	0	0	0
ENSG00000144647	POMGNT2	0.468268	0.34497	0.389171	0.373069	0.365832	0.017191	0.436432	0.390245	0.389047	0.218246	0.431547	0.340643	0.0538102	0.388015	0.375851	0.323757	0.0591677	0.288831	0.245565	0.538455	0.401937	0.354901
ENSG00000126467	TSKS	0.467576	0	0	0	0	0	0	0	0	0	0	0.201111	0	0	0	0.381619	0	0.560547	0	0.0704995	0	0
ENSG00000163888	CAMK2N2	0.467569	0.501123	0.481673	0.604361	0.511093	0.406169	0.460659	0.598293	0.480067	0.472245	0.557971	0.47254	0.416699	0.569143	0.627748	0.376011	0.347534	0.313319	0.36914	0	0.479077	0.482098
ENSG00000187772	LIN28B	0.467525	0.689817	0.786772	0.573797	0.266712	0.796482	0	0.069211	0.000723415	0	0.0396483	0	0.479415	0.560739	0.0331935	0.242057	0	0.0815476	0	0.219843	0.681306	0.472038
ENSG00000087448	KLHL42	0.467374	0.199938	0.0609058	0.171593	0.0650771	0	0.112878	0.274912	0	0.0830025	0.142744	0	0	0.344485	0.229802	0.154847	0	0.191745	0.214994	0.200494	0.0936477	0.0711032
ENSG00000018236	CNTN1	0.464608	0.401483	0.40246	0.462058	0.352555	0.288586	0.539977	0.406619	0.342166	0.376292	0.366569	0.297848	0.204479	0.380678	0.393188	0.42734	0.382278	0.417633	0.431169	0.500699	0.419006	0.161243
ENSG00000141582	CBX4	0.464585	0.188237	0.0802036	0.00356585	0.0439845	0	0	0.255276	0.308455	0.391534	0.215476	0	0.159331	0.299125	0.272608	0.182304	0	0.131641	0	0	0.0797788	0
ENSG00000119782	FKBP1B	0.464466	0.00656698	0.237211	0.164622	0.550343	0	0.294386	0.324574	0.200717	0.361342	0.0714957	0.00275147	0.166169	0.368436	0.269439	0.320157	0.273131	0.340791	0.460813	0.396763	0.406559	0.471844
ENSG00000049618	ARID1B	0.463745	0.2319	0.136378	0.0223232	0	0	0.124443	0.171867	0.0599463	0.193043	0	0	0	0.0414587	0.0243573	0.477397	0.0439756	0.202851	0.39995	0.265902	0.18154	0.400264
ENSG00000006071	ABCC8	0.463605	0.152641	0.401351	0.233771	0.509179	0.0351685	0	0.690818	0.166391	0.0399093	0	0	0.380218	0.538499	0.196371	0.374162	0.0338296	0.14664	0.287435	0.489615	0.142464	0.057864
ENSG00000154065	ANKRD29	0.462529	0.415673	0.680942	0.307959	0.503102	0.319562	0.198521	0.412875	0.350005	0.419429	0.0496097	0.204947	0.0659091	0.632032	0.40423	0	0	0	0.419048	0.33087	0.590004	0.413769
ENSG00000099814	CEP170B	0.462313	0.455891	0.512106	0.426227	0.530124	0.375007	0.450482	0.456424	0.4319	0.427195	0.455829	0.373881	0.377911	0.46436	0.541901	0.448878	0.438063	0.465356	0.445323	0.446916	0.471282	0.470482
ENSG00000139767	SRRM4	0.460747	0	0	0.253741	0.0290462	0.225739	0.236311	0	0.410597	0.311836	0.0497079	0	0	0.238792	0.0675082	0.21427	0.462072	0.392284	0.380025	0.0228923	0.509741	0.394119
ENSG00000188916	FAM196A	0.460231	0.330139	0.900644	0.0994938	0	0	0	0.586332	0.324355	0.0913265	0.286265	0	0.673618	0.723091	0.502512	0	0.00560142	0.480684	0.248303	0.304481	0.923516	0.362041
ENSG00000170571	EMB	0.460167	0.429212	0.356116	0.443123	0.359433	0	0.46889	0.451484	0.42478	0.476514	0.41163	0.204891	0.308021	0.386756	0.334181	0	0	0.395396	0.0305049	0.456078	0.179844	0
ENSG00000133878	DUSP26	0.459654	0.473274	0.414007	0.405132	0.44454	0	0.433159	0.455084	0.471437	0.459358	0.47171	0.461185	0.351171	0.439118	0.477786	0.359325	0.133881	0.311169	0.068877	0.150271	0.472324	0.446136
ENSG00000125355	TMEM255A	0.4596	0.4849	0.451881	0.695839	0	0.0848315	0.783779	0.488155	0.470171	0.396705	0.486236	0.500376	0.406029	0.345434	0.374369	0.197381	0	0.062655	0	0	0.448651	0.0784475
ENSG00000125447	GGA3	0.458684	0.189684	0.433512	0.282972	0.383287	0	0.225546	0.461541	0.156086	0.28612	0.422548	0.0323138	0.385948	0.37007	0.300507	0.435322	0.0109795	0.253451	0.519311	0.413486	0.241146	0.262213
ENSG00000151690	MFSD6	0.457914	0.4239	0.476066	0.576693	0.408899	0.264486	0.418194	0.445117	0.313948	0.245352	0.460344	0.354082	0.281126	0.444757	0.424679	0.30122	0.17356	0.359113	0.357215	0.558173	0.426182	0.294775
ENSG00000148408	CACNA1B	0.45769	0.34399	0.371311	0.445701	0.272569	0.264159	0.512049	0.38423	0.435747	0.384345	0.412485	0.274116	0.128409	0.303829	0.38898	0.462994	0.4124	0.409716	0.454894	0.432924	0.396769	0.676291
ENSG00000162374	ELAVL4	0.457466	0.462441	0.459694	0.442081	0.456182	0	0.459501	0.329989	0.39758	0.458387	0.228917	0.304578	0.378799	0.458189	0.353048	0.414947	0.359099	0.449498	0.26095	0.453397	0.465266	0.302244
ENSG00000128482	RNF112	0.457416	0.0974944	0.215259	0.274924	0	0	0.360281	0.1965	0.278703	0.299321	0.293916	0.072818	0.33608	0.10834	0.159421	0.590693	0.410326	0.467577	0.770235	0.793657	0.131101	0
ENSG00000151952	TMEM132D	0.457297	0	0	0.301648	0	0	0	0	6.02845e-05	0.778288	0	0	0	0.0523418	0.0299202	0.906872	0	0.212852	0	0.924301	0	0
ENSG00000135956	TMEM127	0.456351	0.339989	0.524301	0.0292106	0.387233	0.0137721	0.224695	0.378209	0.153857	0.189643	0.0178504	0.0191323	0.0476604	0.518301	0.382151	0.358685	0.107489	0.333973	0.385573	0.5672	0.488747	0.427534
ENSG00000163900	TMEM41A	0.45625	0.0289958	0.309944	0.000389408	0.290375	0	0	0.279244	0.0041243	0.457951	0.178899	0	0.14399	0.339332	0	0	0	0.0914478	0.201547	0.207103	0.20858	0.3615
ENSG00000177992	SPATA31E1	0.455982	0.0870735	0	0	0.610449	0	0	0.24333	0	0	0.298028	0.75226	0	0	0	0.419388	0	0	0.303659	0.501178	0.617075	0
ENSG00000203724	C1orf53	0.45511	0.539381	0.245762	0	0.0829419	0	0	0.58468	0.653742	0.549469	0.622865	0.514716	0.422494	0.298903	0.101686	0	0	0	0.371734	0.0313635	0.213729	0.355227
ENSG00000258986	TMEM179	0.454792	0.443494	0.446847	0.503688	0.319654	0	0.461594	0.462596	0.469258	0.44135	0.460865	0.36418	0.410746	0.452622	0.462812	0.457039	0.383485	0.383188	0.452999	0.578063	0.418227	0.440651
ENSG00000127561	SYNGR3	0.454652	0.428756	0.434224	0.45213	0.440864	0.352627	0.433973	0.389665	0.443962	0.440217	0.441603	0.389646	0.274849	0.431784	0.43744	0.442092	0.376623	0.390427	0.374313	0.436095	0.462658	0.458645
ENSG00000198934	MAGEE1	0.454297	0.539209	0.638841	0.449913	0.421211	0	0.424928	0.44688	0.451125	0.436828	0.425897	0.389427	0.333236	0.487269	0.459097	0.374927	0.415929	0.313602	0.368823	0.454986	0.479266	0.458464
ENSG00000109436	TBC1D9	0.453482	0.443947	0.459754	0.39339	0.493261	0	0.42814	0.424775	0.383487	0.267468	0.323947	0.407245	0.184122	0.457077	0.439859	0.408165	0.132173	0.398244	0.327451	0.413413	0.461645	0.515684
ENSG00000153237	CCDC148	0.452262	0	0	0.107306	0	0	0.271664	0	0.234569	0	0.137741	0.288031	0	0	0.213253	0.454413	0.2489	0.300207	0.379756	0.272721	0.311188	0.567646
ENSG00000096070	BRPF3	0.451789	0.0832939	0.0839122	0.123061	0.437074	0	0.0705211	0	0	0.0179138	0.136625	0	0	0.00923372	0	0.26834	0.230285	0.324301	0.201048	0.177373	0	0
ENSG00000155980	KIF5A	0.451034	0.456936	0.467981	0.453107	0.459746	0.329253	0.393465	0.468408	0.437686	0.46166	0.428122	0.3981	0.433104	0.472814	0.466744	0.43862	0.395408	0.429614	0.45479	0.447745	0.459916	0.452945
ENSG00000081692	JMJD4	0.450785	0	0	0.0300331	0.485304	0.0732584	0.308632	0.0178465	0.0124789	0	0.141842	0.385871	0	0.233076	0.45376	0.177885	0.250494	0.136509	0.282466	0.282995	0.247236	0.524734
ENSG00000163618	CADPS	0.450247	0.437705	0.484059	0.669041	0.453572	0.433514	0.465737	0.420084	0.334819	0.40237	0.385049	0.141733	0.269887	0.49465	0.458988	0.415521	0.157928	0.320971	0.457661	0.392252	0.458256	0.565994
ENSG00000172350	ABCG4	0.450148	0.445396	0.645219	0.495533	0.318701	0.0357303	0.300171	0.565368	0.342478	0.394459	0.297846	0.358288	0.312271	0.608551	0.414886	0.368441	0	0.371298	0.342087	0.464585	0.371424	0.420011
ENSG00000184672	RALYL	0.450088	0.455492	0.438933	0.397031	0.19837	0	0.554193	0.420359	0.447783	0.461436	0.437718	0.446268	0.142981	0.428838	0.459765	0.444193	0.419766	0.291814	0.44103	0.439416	0.464438	0.42403
ENSG00000104722	NEFM	0.449441	0.476574	0.843065	0.438449	0.619698	0.308451	0.348798	0.763601	0.0684347	0.451066	0.376823	0.190931	0.797618	0.749844	0.43755	0.422052	0	0	0.458534	0.625639	0.566184	0
ENSG00000198797	BRINP2	0.448947	0	0.00713753	0	0	0	0	0.183597	0.603777	0.845454	0.161498	0	0.0898396	0	0	0.627861	0.579728	0.438241	0.779935	0.224719	0.113213	0
ENSG00000029534	ANK1	0.448863	0.433149	0.44613	0.433095	0.616465	0.645822	0.155001	0.486706	0.231934	0.54121	0.281325	0.244719	0.456271	0.639134	0.545313	0	0	0	0	0.00303224	0.455112	0.417171
ENSG00000168036	CTNNB1	0.448496	0.261866	0.284764	0.180318	0	0	0.205126	0.109619	0	0	0.109357	0.0507423	0	0.210942	0.115173	0.274874	0.18464	0.182736	0.270634	0.0714111	0.137429	0.125245
ENSG00000106772	PRUNE2	0.44777	0.423487	0.424686	0.288968	0.446925	0.240959	0.44927	0.432918	0	0.461133	0.144511	0.380108	0	0.412497	0.419831	0.319787	0.121088	0.362296	0.383045	0.177306	0.386117	0.191259
ENSG00000188771	PLET1	0.447762	0	0	0.0789525	0	0	0	0.0709907	0	0	0.791062	0.275467	0	0	0	0	0	0.514236	0.0429791	0	0	0
ENSG00000197121	PGAP1	0.447433	0.272583	0.296513	0.574723	0	0	0.388865	0.0559098	0.377428	0	0.391207	0.15788	0.0610294	0.16742	0.518425	0.0527515	0.0203495	0	0.333228	0	0.5637	0
ENSG00000198300	PEG3	0.447131	0.572231	0.584629	0.605245	0.386468	0.260411	0.482941	0.488345	0.464437	0.454585	0.500113	0.451408	0.426614	0.473158	0.571299	0.171518	0.160612	0.261939	0.271031	0.396539	0.468851	0.44134
ENSG00000078328	RBFOX1	0.446991	0.207941	0.24718	0.374193	0.117609	0.343784	0	0.425341	0.395017	0.484858	0.412505	0.368612	0.639011	0.319291	0.303187	0.594745	0.323168	0.360798	0.574833	0.409588	0	0
ENSG00000174013	FBXO45	0.446484	0.288049	0.299518	0.29528	0.274218	0.13184	0.290479	0.340668	0	0.152957	0.250465	0.0318659	0.107019	0.324101	0.17028	0.420176	0.116739	0.368381	0.560035	0.350426	0.274708	0.260017
ENSG00000148798	INA	0.44624	0.464033	0.598106	0.53676	0.592847	0.335905	0.423463	0.611743	0.418053	0.398046	0.462472	0.409842	0.43354	0.613335	0.484889	0.403005	0.405159	0.41722	0.460177	0.562819	0.452919	0.431096
ENSG00000257704	INAFM1	0.445874	0.469045	0.438336	0.387662	0.44726	0	0.23999	0.45564	0.526494	0.464248	0.466249	0.445782	0.228806	0.445146	0.465896	0.209729	0.260634	0.319372	0.223642	0.238225	0.461643	0.458376
ENSG00000102003	SYP	0.44564	0.457878	0.488562	0.436864	0.435745	0.303732	0.369809	0.45433	0.449209	0.45	0.444267	0.414678	0.405802	0.464486	0.463346	0.48592	0.391925	0.429858	0.471857	0.563175	0.465699	0.436503
ENSG00000197535	MYO5A	0.445588	0.432898	0.43036	0.397595	0.412749	0.341746	0.329014	0.424222	0.347768	0.424316	0.388934	0.24383	0.310321	0.421222	0.412243	0.41611	0.358295	0.388853	0.404492	0.482393	0.431988	0.428769
ENSG00000161594	KLHL10	0.445374	0	0	0	0	0	0	0	0	0	0	0	0	0.177281	0	0.0520475	0	0	0	0	0	0
ENSG00000132872	SYT4	0.444998	0.438369	0.466023	0.551776	0.418446	0.373093	0.454699	0.446933	0.449684	0.359324	0.45589	0.450399	0.431787	0.426722	0.469158	0.450411	0.339803	0.467953	0.450485	0.501859	0.469777	0.433461
ENSG00000112941	PAPD7	0.444653	0.286138	0.344604	0.283171	0.281319	0	0.276367	0.322941	0.144869	0.124408	0.343354	0.0974664	0.0314171	0.307187	0.352792	0.299239	0.332631	0.0890816	0.476398	0.226715	0.340429	0.229734
ENSG00000166924	NYAP1	0.444565	0.4595	0.520646	0.446072	0.552153	0.238836	0.55328	0.466026	0.431878	0.410164	0.458156	0.404719	0.418804	0.460777	0.461317	0.408989	0.370677	0.364696	0.422141	0.398779	0.511054	0.46558
ENSG00000117335	CD46	0.443991	0	0	0.205948	0.00366089	0	0.13163	0	0	0	0	0	0	0.200282	0	0.280446	0	0.179993	0	0.15995	0	0.0611914
ENSG00000163376	KBTBD8	0.443962	0	0	0	0	0	0.228916	0	0	0	0	0	0	0	0	0.407656	0.35157	0.497056	0.201635	0.293963	0	0
ENSG00000198932	GPRASP1	0.443883	0.472098	0.481653	0.650808	0.353967	0.314947	0.455181	0.470239	0.506081	0.464317	0.460621	0.445694	0.428009	0.467279	0.467501	0.357869	0.271202	0.0625517	0.28156	0.332416	0.471401	0.408514
ENSG00000163214	DHX57	0.443154	0.120081	0.180253	0.191861	0.00684008	0	0.351381	0.300685	0	0.299351	0.0210917	0.239917	0.254144	0.165731	0.362049	0.373047	0	0.307202	0.332862	0.50509	0.322328	0.18105
ENSG00000177485	ZBTB33	0.443079	0	0	0.35349	0	0	0.215523	0	0	0	0	0	0	0	0	0.122029	0	0	0.287179	0.0370651	0	0.178351
ENSG00000152214	RIT2	0.442678	0.480659	0.476391	0.494873	0.362622	0.425659	0.488062	0.482489	0.475973	0.469785	0.47434	0.479928	0.34771	0.4832	0.480039	0.215511	0	0.255994	0.227226	0.318965	0.483783	0.390642
ENSG00000105429	MEGF8	0.442568	0.425433	0.548089	0.404996	0.40737	0.418099	0.269482	0.564036	0.262841	0.356244	0.393592	0.296436	0.402324	0.500644	0.517208	0.376985	0.183612	0.274902	0.371483	0.573169	0.438598	0.419161
ENSG00000119523	ALG2	0.442547	0.45525	0.465189	0.523398	0.429374	0.146329	0.467423	0.463999	0.437182	0.329763	0.49887	0.37172	0.2434	0.470529	0.585982	0.325471	0.323562	0.346146	0.390493	0.361225	0.468629	0.47698
ENSG00000141404	GNAL	0.442465	0.420442	0.40396	0.334364	0.444688	0	0	0.379557	0.0528007	0	0.155392	0.123112	0	0.405772	0.327831	0.514005	0.405952	0.386806	0.420145	0	0.435168	0.431344
ENSG00000160710	ADAR	0.442289	0.604204	0.617875	0.573879	0.43167	0.383636	0.436311	0.540454	0.452358	0.38138	0.437092	0.37329	0.401534	0.539522	0.623862	0.343949	0.281738	0.319749	0.364267	0.396243	0.531826	0.459505
ENSG00000172461	FUT9	0.442271	0.569452	0.553161	0.516514	0.183924	0.0719092	0.33345	0.549203	0.357226	0.383171	0.372807	0.377958	0.524501	0.5159	0.489708	0.34987	0.292342	0.451792	0.232054	0.558821	0.499721	0.27652
ENSG00000160396	HIPK4	0.441815	0	0.117701	0	0.713007	0	0.056658	0.73076	0.443261	0.104365	0.27316	0	0.0941923	0	0	0.0314165	0	0	0.297935	0	0.768456	0.0739734
ENSG00000174206	C12orf66	0.441803	0	0.355785	0	0	0	0.0491932	0.0726221	0	0	0	0.126832	0	0	0.319434	0.411294	0	0.301914	0.229233	0.0716167	0	0.143461
ENSG00000114923	SLC4A3	0.441792	0.41159	0.470966	0.39379	0.585932	0.310878	0.102468	0.562165	0.265522	0.426099	0.239602	0.324749	0.068984	0.591675	0.401439	0.420283	0.179387	0.384125	0.34976	0.64698	0.453771	0.43482
ENSG00000166436	TRIM66	0.441357	0.797699	0.822734	0.691385	0.673639	0	0.286782	0.766517	0.584465	0.525942	0.905134	0.787646	0.363611	0.79223	0.93119	0	0.286912	0.313459	0	0.297169	0.606631	0.105346
ENSG00000186017	ZNF566	0.441165	0.0328678	0	0	0.0957611	0.0642697	0	0	0.330525	0	0	0	0	0	0.0359554	0	0	0	0.0801442	0.0306416	0.206599	0.0223584
ENSG00000142583	SLC2A5	0.441149	0	0	0	0	0.391752	0	0	0	0	0	0	0	0	0.146055	0	0	0	0	0	0	0
ENSG00000163288	GABRB1	0.440883	0.269692	0.315723	0.581961	0	0	0.583781	0.190843	0.359176	0	0.510192	0.0194523	0.0239973	0.172706	0.312821	0.506337	0.289733	0.410535	0.626908	0.422914	0.47931	0.176761
ENSG00000136531	SCN2A	0.440541	0.461912	0.410898	0.538534	0.309347	0.118797	0.372548	0.420687	0.505365	0.437111	0.447039	0.412818	0.361108	0.370024	0.444619	0.608189	0.449851	0.443329	0.546605	0.625581	0.434519	0.436124
ENSG00000099625	CBARP	0.440312	0.49115	0.458957	0.456916	0.41593	0.0856812	0.422556	0.450566	0.517156	0.472181	0.530078	0.4459	0.387927	0.454431	0.515642	0.45411	0.376434	0.355672	0.450078	0.429616	0.469401	0.452783
ENSG00000189184	PCDH18	0.44004	0.791053	0.609703	0.16663	0	0.135169	0.69784	0.406479	0.316507	0.172739	0.438576	0.800876	0	0.0090456	0.317983	0	0	0	0	0	0.293275	0
ENSG00000103353	UBFD1	0.440027	0.584852	0.66626	0.316656	0.379088	0.377044	0.377046	0.538719	0.324784	0.0627421	0.441702	0.419492	0.0997326	0.57016	0.578875	0.076174	0	0	0.266439	0.0418934	0.568915	0.419419
ENSG00000145920	CPLX2	0.439959	0.316211	0.377267	0.216365	0.10254	0.192914	0.534149	0.412397	0	0	0.165027	0.294665	0.299405	0.41982	0.339603	0.648035	0	0.0380682	0.658189	0.036174	0.392133	0.746195
ENSG00000249853	HS3ST5	0.439188	0.349273	0.181481	0.513612	0.443146	0.599955	0.602035	0.41959	0.425767	0.426621	0.366357	0.394519	0.10705	0.241138	0.49599	0	0	0.110569	0	0.0426478	0.250185	0
ENSG00000133636	NTS	0.438867	0.315097	0.536724	0	0	0	0	0.2388	0.245641	0	0	0	0	0	0	0	0	0	0	0.569389	0.928976	0
ENSG00000106789	CORO2A	0.438714	0.285965	0.238366	0.431902	0.435683	0.137175	0.399055	0.398283	0.305007	0.207632	0.41196	0.155477	0.0683155	0.297334	0.454952	0.109011	0.202258	0.462271	0.451572	0.390955	0.181468	0.130475
ENSG00000143847	PPFIA4	0.438472	0.413664	0.494932	0.399631	0.591288	0.114597	0.45488	0.528318	0.364296	0.433514	0.443604	0.352068	0.389838	0.510139	0.459766	0	0	0	0.511493	0.341517	0.536897	0.452069
ENSG00000135119	RNFT2	0.438455	0.393701	0.489993	0.169561	0.393854	0	0.0642962	0.370953	0.182786	0.403257	0.342767	0.217943	0.378822	0.434271	0.336419	0.528702	0.333922	0.417289	0.569706	0.644062	0.550692	0.415805
ENSG00000136153	LMO7	0.438397	0	0	0	0	0	0	0	0	0	0	0	0.630154	0	0	0.960277	0.923179	0.547082	0.842096	0.820122	0	0
ENSG00000157064	NMNAT2	0.437838	0.544773	0.541327	0.340737	0.449766	0	0.387911	0.443885	0.394096	0.388048	0.444141	0.393193	0.306965	0.474714	0.514335	0.452472	0.321068	0.448067	0.450258	0.416594	0.505779	0.480854
ENSG00000176788	BASP1	0.437443	0.510919	0.440933	0.426147	0.308254	0.203112	0.382375	0.42317	0.445963	0.41462	0.450767	0.400164	0.195789	0.429609	0.441423	0.455281	0.42792	0.449004	0.522981	0.407043	0.435088	0.433043
ENSG00000205363	C15orf59	0.437016	0.22709	0.249423	0.252528	0.2209	0.484813	0	0.365996	0.397075	0.623756	0.225795	0.274714	0.273495	0.400391	0.358077	0.511385	0.452957	0.381321	0.524128	0.431434	0.300978	0.555083
ENSG00000135503	ACVR1B	0.436907	0.388101	0.365178	0.460897	0.0703029	0.182865	0.265147	0.470903	0.37818	0.433521	0.415365	0.190662	0.393407	0.459423	0.502367	0.569512	0.331349	0.442252	0.413791	0.667436	0.463199	0.377843
ENSG00000058335	RASGRF1	0.436727	0.583482	0.543192	0.48271	0.553093	0	0.460693	0.502497	0.619903	0.577272	0.442076	0.427736	0.429138	0.506459	0.566071	0.418693	0.417817	0.354565	0.498503	0.63634	0.466892	0.382243
ENSG00000115137	DNAJC27	0.436725	0.632468	0.765571	0.551517	0.553247	0.347492	0.396752	0.637388	0.431978	0.427493	0.546608	0.447859	0.39924	0.689458	0.67364	0.342997	0.273478	0.397681	0.430517	0.391248	0.638644	0.443776
ENSG00000186462	NAP1L2	0.436678	0.653006	0.68615	0.678008	0.361891	0.455159	0.444465	0.607314	0.460786	0.445483	0.449872	0.462184	0.511498	0.609303	0.571506	0.141575	0.0569864	0.0457915	0.338702	0.373346	0.584212	0.293397
ENSG00000152977	ZIC1	0.435656	0.183288	0.416803	0	0.749543	0.46408	0	0	0	0	0	0	0	0	0	0	0	0	0	0	0	0
ENSG00000198026	ZNF335	0.435531	0	0.0181541	0	0	0	0.106686	0.320397	0.0541558	0	0.243934	0.150617	0	0	0.189724	0.201477	0	0.0752583	0.248757	0.43506	0.249863	0.0766515
ENSG00000047230	CTPS2	0.435372	0.300921	0.486961	0.181126	0.349922	0.123097	0.287447	0.145821	0.025657	0.193624	0.130671	0.000959816	0	0.267835	0.262204	0	0	0.0382576	0.0170371	0	0.368138	0.029987
ENSG00000137507	LRRC32	0.435311	0	0	0	0	0	0	0	0	0	0	0	0	0	0	0.142704	0	0	0	0.0536784	0	0
ENSG00000105409	ATP1A3	0.435163	0.484099	0.533529	0.491803	0.477639	0.378593	0.365892	0.510155	0.455852	0.473954	0.444567	0.437664	0.439394	0.56989	0.466631	0.442788	0.417941	0.330234	0.449221	0.521041	0.468931	0.46102
ENSG00000124140	SLC12A5	0.434944	0.61301	0.609685	0.63206	0.402605	0.393641	0.422657	0.601092	0.54879	0.508926	0.496046	0.45859	0.49423	0.628238	0.582482	0.481508	0.382929	0.411804	0.421224	0.56143	0.474525	0.392025
ENSG00000185436	IFNLR1	0.434896	0	0	0.401252	0.340856	0	0	0.390813	0.0585966	0	0	0	0	0.708446	0.410987	0	0.459403	0	0	0.0332595	0	0
ENSG00000130540	SULT4A1	0.434634	0.451147	0.458274	0.409671	0.451695	0.202691	0.390906	0.450562	0.422931	0.448073	0.441924	0.372328	0.358128	0.460611	0.468244	0.442081	0.368873	0.39953	0.451877	0.447934	0.458659	0.446172
ENSG00000170616	NA	0.434606	0.37168	0.628969	0.150915	0.52089	0.558361	0	0.420193	0.0292538	0.559428	0	0.149575	0.538483	0.693083	0.270523	0.0246858	0	0	0.225352	0.34139	0.428905	0.694703
ENSG00000133069	TMCC2	0.434497	0	0.123783	0.133834	0.599248	0	0.0349585	0.121402	0	0	0.0406802	0	0	0.248659	0.0475037	0.0626059	0.0672568	0.110574	0.403412	0	0.205674	0.0673666
ENSG00000172782	FADS6	0.434465	0.267444	0.312584	0.237793	0.544616	0.0203371	0	0.157659	0.197757	0.207164	0.338197	0	0.0356283	0.600285	0.0940025	0	0	0	0	0	0.284096	0.0416329
ENSG00000167703	SLC43A2	0.434232	0.0309153	0.403706	0.57665	0.570091	0.10879	0	0.249636	0	0	0	0	0.00287433	0.480173	0.243535	0	0	0	0	0.325756	0.0329972	0
ENSG00000160097	FNDC5	0.434227	0.589106	0.760785	0.538312	0.573388	0.402368	0	0.635027	0.0565413	0.395608	0.269034	0.296713	0.346918	0.79387	0.604693	0	0	0	0.342877	0	0.625147	0.451965
ENSG00000143630	HCN3	0.433978	0.420642	0.593841	0.607707	0.431758	0.380464	0.580316	0.39167	0.408463	0	0.415977	0.386726	0	0.535082	0.667085	0	0	0.441922	0.0347085	0.0778497	0.676642	0.716976
ENSG00000183837	PNMA3	0.433715	0.609491	0.611145	0.68757	0.403819	0	0.658275	0.427081	0.745421	0.425587	0.600357	0.596634	0.313848	0.444511	0.752896	0.302642	0.388345	0	0.390284	0	0.572733	0.367034
ENSG00000091844	RGS17	0.433201	0.46303	0.454386	0.462786	0.379862	0.295315	0.45444	0.449072	0.476485	0.460493	0.452384	0.445419	0.401264	0.455085	0.43924	0.35639	0.366158	0.249383	0	0.306107	0.457036	0.422115
ENSG00000158301	GPRASP2	0.433088	0.476345	0.472326	0.712808	0.41612	0.380373	0.565132	0.469076	0.493814	0.470995	0.539637	0.486526	0.353215	0.462252	0.481002	0	0.0503564	0	0.127522	0.00293303	0.485741	0.453909
ENSG00000187860	CCDC157	0.432803	0	0	0.00939447	0	0	0.0672292	0	0	0	0	0	0	0	0	0.0350388	0	0	0	0.158464	0	0
ENSG00000206190	ATP10A	0.43275	0.0130971	0	0	0	0.334985	0	0	0	0	0	0	0	0	0	0	0	0	0	0	0	0
ENSG00000188089	PLA2G4E	0.432389	0.436976	0.658444	0.596328	0.293722	0	0.198209	0.359845	0.164997	0.446665	0.545784	0.166905	0.51593	0.491342	0.684817	0.425885	0.388874	0.345686	0.101988	0.782288	0.581383	0.258464
ENSG00000154118	JPH3	0.431875	0.400007	0.328563	0.563765	0.418556	0	0.373519	0.445393	0.412621	0.384781	0.42433	0.398	0.512719	0.418605	0.423153	0.550988	0.349599	0.410247	0.602594	0.421121	0.359976	0.359237
ENSG00000067715	SYT1	0.431769	0.384655	0.422126	0.311069	0.395842	0.241064	0.367604	0.26667	0.38181	0.418491	0.263592	0.183133	0.153209	0.391762	0.323537	0.452697	0.308922	0.400116	0.446216	0.499924	0.434752	0.477827
ENSG00000128881	TTBK2	0.431655	0.490618	0.580764	0.579912	0.364267	0.3408	0.446562	0.54744	0.39044	0.44804	0.414089	0.39877	0.216372	0.626858	0.530081	0.307197	0	0.272489	0.0425262	0.411459	0.469681	0.392812
ENSG00000105963	ADAP1	0.431432	0.246987	0.301558	0.231453	0.531907	0	0.189322	0.336462	0	0.262508	0.0192127	0.0303302	0.194174	0.353463	0.261968	0.515836	0.216212	0.385181	0.421839	0.570152	0.168966	0.211139
ENSG00000154277	UCHL1	0.431385	0.451704	0.43856	0.408516	0.431285	0.195542	0.379527	0.421458	0.434594	0.375446	0.431732	0.402911	0	0.420318	0.44359	0.434156	0.379934	0.385685	0.443164	0.409166	0.441376	0.420391
ENSG00000167549	CORO6	0.431276	0.540196	0.757879	0.622174	0.592441	0.781958	0.0300909	0.896667	0.404024	0.698931	0.395715	0.0167648	0.963015	0.914	0.518286	0	0	0	0	0.947781	0.870958	0
ENSG00000198785	GRIN3A	0.430953	0.429841	0.436986	0.461883	0.408733	0	0.152688	0.413099	0.551952	0.0987042	0.423535	0.0444075	0.517463	0.409411	0.456214	0.405666	0.644865	0.372973	0.308328	0.16508	0.455284	0.104389
ENSG00000114270	COL7A1	0.430898	0	0	0.0524727	0.29433	0.387645	0.802996	0	0	0	0	0	0.086704	0	0	0	0.135318	0	0	0	0	0
ENSG00000146006	LRRTM2	0.430863	0.618496	0.346153	0.185093	0	0	0.450487	0.416338	0.409242	0.333414	0.096049	0.0994369	0.0852273	0.376713	0.465505	0.15764	0.476071	0.415604	0.268336	0.455649	0.256135	0.358802
ENSG00000186367	KIAA1024L	0.430762	0.478309	0.469033	0.564799	0.252225	0	0.558829	0.47099	0.542562	0.431854	0.64378	0.529489	0	0.360893	0.483035	0.129562	0.13942	0.344013	0.35558	0	0.479016	0.329675
ENSG00000103723	AP3B2	0.430463	0.377712	0.423596	0.386861	0.330927	0	0.383488	0.43576	0.293692	0.37125	0.365955	0	0.381051	0.434841	0.368258	0.418217	0.310722	0.238184	0.430748	0.527126	0.412477	0.402569
ENSG00000117360	PRPF3	0.430043	0.0701323	0.0231375	0	0.410589	0	0	0.147792	0.278997	0	0.065272	0.0416712	0	0.19781	0	0.0993409	0	0	0.0865488	0.105438	0	0.0990607
ENSG00000055163	CYFIP2	0.4294	0.425407	0.415026	0.41401	0.433007	0.361847	0.300116	0.436137	0.374271	0.413255	0.417869	0.338487	0.349095	0.444816	0.42004	0.456759	0.394116	0.428891	0.473734	0.544164	0.409016	0.400313
ENSG00000166780	C16orf45	0.429364	0.438633	0.417598	0.362888	0.406754	0.148024	0.32416	0.431096	0.520454	0.512606	0.449118	0.434893	0.31671	0.431945	0.456751	0.421636	0.359304	0.381511	0.42794	0.390296	0.437965	0.380504
ENSG00000155974	GRIP1	0.429254	0.237312	0.374944	0.150165	0	0	0.357822	0.246118	0.0153942	0	0	0.036473	0.108866	0.328486	0.271914	0.196188	0.341261	0.208604	0.343224	0.0197025	0.415397	0.857914
ENSG00000102743	SLC25A15	0.429242	0	0.10689	0.032905	0	0	0.0160886	0.247603	0	0	0	0	0.298853	0.423006	0.151079	0	0	0	0	0	0	0
ENSG00000198689	SLC9A6	0.429062	0.342547	0.313817	0.685448	0.211703	0.341546	0.45949	0.396221	0.354827	0.388698	0.442634	0.384263	0.361789	0.343903	0.377125	0.34246	0.325023	0.391859	0.376036	0.287948	0.345848	0.426513
ENSG00000136653	NA	0.428392	0.388726	0.708809	0.434394	0.621804	0.187094	0.381679	0.616308	0.390024	0.361171	0.524609	0.4324	0.40172	0.469298	0.590543	0	0.275436	0.427575	0.0798086	0.299174	0.643206	0.337148
ENSG00000134030	CTIF	0.428355	0.324994	0.461253	0.463165	0.524311	0.198154	0.585432	0.479341	0.337499	0.124655	0.395796	0.151453	0	0.444212	0.492514	0.0786988	0.126609	0.0228822	0.371483	0.00118136	0.361495	0.409202
ENSG00000164306	PRIMPOL	0.427059	0	0	0	0	0	0.138075	0	0	0	0	0	0	0.143327	0	0	0	0	0	0	0	0
ENSG00000151834	GABRA2	0.426996	0.351432	0.416005	0.173871	0.255894	0	0.343966	0.0757589	0.329911	0	0.363624	0	0.148797	0.177409	0.195004	0.650723	0.420953	0.444444	0.68343	0.507529	0.438396	0.439374
ENSG00000111300	NAA25	0.426797	0.276879	0.290945	0.334173	0.252362	0	0.169343	0.391998	0.149836	0.0446356	0.353446	0.107389	0.071807	0.289118	0.325602	0.348621	0	0.326724	0.330863	0.373802	0.230475	0.125069
ENSG00000110429	FBXO3	0.426521	0.336848	0.486628	0.428792	0.309456	0.105522	0.362848	0.375626	0.380947	0.352396	0.352301	0.253419	0.253611	0.422406	0.399416	0	0	0	0.0268126	0.102005	0.383848	0.163426
ENSG00000104435	STMN2	0.426478	0.447202	0.431576	0.404097	0.406546	0.178827	0.369174	0.424126	0.455943	0.438788	0.437689	0.386344	0.083623	0.422568	0.441403	0.447314	0.389607	0.383582	0.447219	0.430379	0.431906	0.436249
ENSG00000148154	UGCG	0.426463	0.404717	0.399605	0.615919	0.105946	0.384237	0.375001	0.428065	0.31089	0.365677	0.202883	0.15299	0.281368	0.432443	0.390656	0.424923	0.105945	0.388757	0.39164	0.428501	0.411114	0.44527
ENSG00000163689	C3orf67	0.426426	0.190006	0.681182	0	0.0417148	0	0	0.126129	0.060586	0	0.0127184	0.210455	0.121506	0.24564	0.708666	0.191544	0.128887	0.308792	0.239197	0.0863873	0.635032	0
ENSG00000151917	BEND6	0.426175	0.597591	0.629642	0.582578	0.562871	0.282069	0.363925	0.684278	0.569443	0.569841	0.609407	0.466323	0.625092	0.666734	0.634856	0.349352	0.328414	0.422152	0.368037	0.308165	0.472573	0.465849
ENSG00000183077	AFMID	0.425988	0.263382	0.599291	0	0.668094	0	0	0	0	0	0	0	0	0.401603	0.36305	0.0117518	0	0.0709416	0	0.0879349	0.63932	0
ENSG00000120053	GOT1	0.425937	0.580907	0.65738	0.373846	0.537876	0.294323	0.237262	0.442987	0.337583	0.428033	0.417241	0.351912	0.390164	0.608616	0.453801	0.396116	0.246495	0.302275	0.378101	0.41349	0.547838	0.413445
ENSG00000084734	GCKR	0.425844	0	0	0	0	0	0	0	0.186431	0	0	0	0	0	0	0.133691	0	0	0	0	0	0
ENSG00000125746	EML2	0.42572	0.456037	0.571621	0.336777	0.523004	0.316818	0.336312	0.528065	0.327621	0.350072	0.381331	0.264793	0.152473	0.586006	0.556905	0	0.115716	0	0.304018	0.250766	0.433892	0.403907
ENSG00000085365	SCAMP1	0.425691	0.413389	0.394426	0.418569	0.278086	0.150442	0.380992	0.426339	0.400214	0.364249	0.409879	0.354228	0.292094	0.424204	0.43206	0.395384	0.236208	0.34072	0.417568	0.386546	0.380667	0.324896
ENSG00000118420	UBE3D	0.425663	0.00557743	0	0	0	0	0.0339392	0.172374	0.213931	0.201433	0	0.163228	0.667863	0.059304	0.246628	0.120284	0.420232	0	0	0.0151213	0	0
ENSG00000013293	SLC7A14	0.425659	0.438271	0.455223	0.632536	0.464369	0.237753	0.444662	0.474009	0.422504	0.0685031	0.467237	0.455433	0.17417	0.469156	0.478165	0.436445	0.0894976	0.153692	0.528602	0.160003	0.476744	0.448837
ENSG00000125814	NAPB	0.425403	0.457665	0.455143	0.428678	0.441937	0.232072	0.343566	0.456236	0.448	0.446082	0.444389	0.406907	0.395849	0.45602	0.459518	0.522684	0.410636	0.450148	0.46482	0.428567	0.451914	0.443697
ENSG00000143502	SUSD4	0.425219	0.399006	0.596766	0.354201	0	0.0345879	0.312329	0.419851	0.353018	0.410199	0.423319	0.34707	0.464829	0.524543	0.429745	0.378673	0.258694	0.422467	0.521876	0.396399	0.449658	0.395619
ENSG00000082641	NFE2L1	0.42473	0.381617	0.441266	0.362932	0.375465	0.196068	0.377686	0.427606	0.310715	0.304486	0.37887	0.284656	0.374285	0.449157	0.426126	0.386591	0.143999	0.347159	0.394505	0.422552	0.432211	0.402047
ENSG00000134986	NREP	0.424682	0	0.268475	0.14582	0.398493	0.321635	0	0	0	0	0	0	0	0.211927	0	0	0	0	0	0	0.185242	0
ENSG00000162378	ZYG11B	0.424658	0.404301	0.460878	0.407764	0.336472	0.253737	0.41097	0.420284	0.305033	0.376936	0.370896	0.173488	0.212523	0.453535	0.499095	0.37732	0.169477	0.423089	0.464894	0.530705	0.443832	0.413096
ENSG00000162706	CADM3	0.424638	0.392832	0.424361	0.435961	0.418418	0.16968	0.376317	0.430657	0.308637	0.400025	0.434489	0.397979	0.281524	0.436188	0.442283	0.49321	0.328905	0.377772	0.445406	0.401192	0.394126	0.386967
ENSG00000178252	WDR6	0.424567	0.464689	0.431458	0.476215	0.417221	0.128347	0.471632	0.41979	0.572657	0.435366	0.475399	0.459735	0	0.42262	0.469649	0.325021	0.384977	0.36631	0.370107	0.12328	0.475001	0.460312
ENSG00000183060	LYSMD4	0.424545	0.564821	0.494403	0.0862153	0.402036	0	0	0.528784	0.443507	0.410211	0.525728	0.433453	0.271962	0.460072	0.559425	0.330119	0.206716	0.317867	0.411472	0.230251	0.525179	0.327749
ENSG00000185338	SOCS1	0.424394	0	0	0	0	0	0	0	0	0	0	0	0	0	0	0	0	0	0	0	0	0
ENSG00000122966	CIT	0.424298	0.408179	0.415017	0.409945	0.373955	0.254701	0.345762	0.455677	0.371966	0.52143	0.410773	0.398242	0.38906	0.451626	0.420656	0.402678	0	0.0131715	0	0.482328	0.427091	0.539157
ENSG00000138698	RAP1GDS1	0.424074	0.12548	0.320628	0.103263	0.359861	0.174727	0.244637	0.286504	0	0.401144	0	0.244535	0.111163	0.337169	0.305144	0.19805	0.0835824	0.289827	0.338205	0.339081	0.271551	0.398077
ENSG00000117602	RCAN3	0.424044	0.346973	0.429364	0.394455	0.443745	0.395275	0.658637	0.378977	0.177333	0	0.35556	0.243601	0	0.393611	0.439594	0	0	0	0	0	0.441564	0.452039
ENSG00000203805	PLPP4	0.423749	0.0852834	0.0320459	0.306912	0.704593	0.373281	0	0.130719	0.685724	0.538074	0.388722	0.694213	0	0.305653	0.403275	0	0	0	0	0	0.0174617	0
ENSG00000159082	SYNJ1	0.423561	0.462543	0.536685	0.422723	0.422123	0.280306	0.402764	0.42209	0.37877	0.406526	0.419998	0.318634	0.231183	0.471892	0.46917	0.42981	0.399186	0.447452	0.516875	0.414535	0.43907	0.446914
ENSG00000136720	HS6ST1	0.423554	0.320658	0.359692	0	0.392589	0	0	0.399005	0.145694	0.272346	0.103835	0	0.582771	0.501016	0.204128	0.379389	0.260852	0.39331	0.248789	0.578915	0.193502	0
ENSG00000112796	ENPP5	0.423035	0.41855	0.513092	0.330484	0.316294	0.0773759	0.391703	0.423665	0.405647	0.374279	0.311822	0.240354	0.391617	0.55258	0.419993	0.287449	0.0680041	0.318098	0.281517	0.483579	0.442808	0.414032
ENSG00000182255	KCNA4	0.423028	0.122681	0	0.596973	0	0	0.263187	0.214598	0.162403	0.286929	0.203146	0	0.0932389	0	0.00754136	0.469452	0	0.0404762	0.298393	0	0	0
ENSG00000079102	RUNX1T1	0.422841	0.412579	0.123621	0.506596	0.372733	0.403672	0	0.578976	0.689372	0.590618	0.443417	0.307925	0.768057	0.324449	0.354448	0.365963	0.334198	0.450571	0.436009	0.307306	0.383248	0
ENSG00000113327	GABRG2	0.422604	0.645897	0.708016	0.626294	0.150959	0	0.344093	0.651862	0.540293	0.569589	0.448047	0.45381	0.61457	0.612908	0.492198	0.515952	0.121086	0.250475	0.352138	0.470251	0.559074	0.445296
ENSG00000113649	TCERG1	0.422257	0.109293	0.123472	0.211375	0.0654464	0	0.135537	0.0369589	0.0683388	0.249063	0	0	0	0.0529536	0	0.244952	0	0	0.307354	0.24307	0.0400301	0.0257922
ENSG00000180488	MIGA1	0.421952	0.520796	0.598159	0.37834	0.398599	0.12842	0.37439	0.433864	0.407224	0.336254	0.407465	0.390698	0.291573	0.539573	0.439983	0.37746	0.304127	0.321689	0.372513	0.407037	0.450747	0.402012
ENSG00000040199	PHLPP2	0.421892	0.539688	0.493268	0.615229	0.303948	0.24971	0.392367	0.442783	0.395495	0.347677	0.516272	0.364036	0.388217	0.412437	0.60382	0.40518	0.250286	0.305401	0.261641	0.415653	0.44371	0.435067
ENSG00000178233	TMEM151B	0.421885	0.420427	0.666216	0.39315	0.63472	0.508372	0	0.424515	0.0615768	0.151368	0.342631	0.0666752	0.297176	0.635	0.576028	0.450814	0.453423	0.399948	0.581249	0.519695	0.45303	0.36265
ENSG00000156113	KCNMA1	0.421478	0.370148	0.123995	0.394719	0.196702	0	0.126196	0.268952	0.12726	0.0409566	0.229932	0.213337	0.0516711	0.30649	0.2439	0.667883	0.542857	0.45673	0.562104	0.627788	0.108202	0
ENSG00000182636	NDN	0.421389	0.437496	0.458488	0.413172	0.290273	0.000735913	0.396893	0.404993	0.426974	0.235176	0.400255	0.339408	0.157821	0.39205	0.409022	0.139879	0.261152	0.209711	0.378263	0.268361	0.459798	0.350326
ENSG00000152767	FARP1	0.42112	0	0	0	0	0	0.0629173	0	0	0	0	0	0	0	0	0.358074	0.182734	0.0118506	0	0.596866	0	0
ENSG00000138400	MDH1B	0.420574	0	0	0	0	0	0	0	0	0	0	0	0	0	0	0	0	0	0.078564	0	0	0.0337733
ENSG00000170500	LONRF2	0.420485	0.467723	0.520645	0.650191	0.433219	0.157556	0.565471	0.453619	0.466736	0.423615	0.52792	0.465205	0.391405	0.472178	0.538667	0.42156	0.390573	0.460291	0.446031	0.415012	0.47597	0.43534
ENSG00000087263	OGFOD1	0.420141	0.626786	0.635794	0.684018	0.407878	0.192184	0.401397	0.669513	0.60391	0.449506	0.718042	0.613611	0.50821	0.607924	0.670613	0.440819	0.318927	0.435328	0.456363	0.478225	0.510778	0.415332
ENSG00000065609	SNAP91	0.419565	0.433321	0.389339	0.667245	0.456128	0.251438	0.46128	0.43729	0.396681	0.435333	0.434437	0.333891	0.303161	0.432586	0.412615	0.408174	0.334093	0.444859	0.486122	0.380347	0.389542	0.418854
ENSG00000187189	TSPYL4	0.419307	0.538857	0.505088	0.377487	0.412321	0.221646	0.321144	0.453235	0.465465	0.466344	0.449225	0.423626	0.403498	0.497706	0.458708	0.320676	0.187054	0.314903	0.395868	0.311286	0.454763	0.43373
ENSG00000121871	SLITRK3	0.419041	0.557345	0.240023	0.00405432	0	0	0	0.623251	0.131477	0.481979	0.0323657	0	0.280629	0.329577	0.203045	0.692621	0.473856	0.249183	0.604042	0.563257	0.164308	0.00344912
ENSG00000126216	TUBGCP3	0.418929	0.0409679	0.27014	0.253135	0.0730455	0	0.301121	0.242459	0.0435929	0.0608096	0.137258	0.0581944	0.39057	0.484035	0.400045	0.132368	0	0.0746925	0.161123	0.325707	0.238647	0.281949
ENSG00000143499	SMYD2	0.418678	0.248256	0.250825	0.236649	0.0740975	0.0976661	0.205398	0.310521	0.299462	0.417951	0.0612082	0.253101	0.479011	0.382163	0.181458	0.457582	0.134689	0.286691	0.392908	0.26771	0.277454	0.400879
ENSG00000184350	MRGPRE	0.418623	0.380884	0.38952	0.380452	0.13878	0	0.623936	0.293133	0.276868	0.360177	0.494964	0.409033	0.316617	0.409735	0.367289	0	0.346051	0.345122	0	0.0931629	0.40809	0.477681
ENSG00000171450	CDK5R2	0.418454	0.384568	0.386602	0.482476	0.415154	0.377494	0.396653	0.423184	0.405228	0.431017	0.369309	0.176625	0.272343	0.421857	0.41673	0.55294	0.423178	0.431112	0.402984	0.583359	0.396373	0.445107
ENSG00000186469	GNG2	0.418001	0.40202	0.306796	0.358146	0	0	0.421584	0.2231	0.429868	0.297315	0.415608	0.391168	0.164572	0.244276	0.384781	0.352441	0.261558	0.368809	0.459297	0.112168	0.386997	0.621475
ENSG00000177098	SCN4B	0.417749	0.146711	0.727601	0	0.44681	0.502024	0	0.883501	0	0	0	0	0.890679	0.794608	0	0	0	0	0	0.923016	0	0
ENSG00000145198	VWA5B2	0.417548	0.601026	0.608022	0.659857	0.535081	0.493314	0.396843	0.781086	0.579906	0.625042	0.682053	0.541606	0.728198	0.67045	0.635964	0.318209	0	0.343312	0.208515	0.521295	0.444883	0.216739
ENSG00000137337	MDC1	0.417384	0	0	0	0.415662	0.112809	0	0	0	0	0	0	0	0.416358	0.0605016	0	0	0.00535714	0	0	0	0
ENSG00000111674	ENO2	0.417315	0.46821	0.563714	0.449367	0.448038	0.306608	0.401602	0.465683	0.461692	0.466288	0.46199	0.412259	0.511155	0.570129	0.49112	0.43576	0.37399	0.390698	0.426469	0.444299	0.47208	0.367538
ENSG00000138463	DIRC2	0.417205	0	0.0512689	0.10731	0.0122367	0	0.314304	0	0	0	0	0	0	0.114416	0	0.0997031	0.0544378	0.0949626	0.138097	0.235222	0.0454706	0.120013
ENSG00000105641	SLC5A5	0.41703	0	0	0	0	0	0.0654674	0	0.584708	0.329735	0.455433	0.419894	0	0	0.297455	0	0	0.758998	0	0.901501	0.506393	0.231392
ENSG00000171298	GAA	0.417006	0.470826	0.457963	0.512448	0.284992	0.28686	0.44344	0.442837	0.46831	0.40181	0.494909	0.437072	0.233521	0.443553	0.544319	0	0.0492067	0.0969008	0.198655	0.40583	0.458788	0.384869
ENSG00000145730	PAM	0.416305	0.379662	0.0140884	0.391436	0	0	0.463292	0.401642	0.417762	0	0.427747	0.343123	0	0.310907	0.229379	0.361011	0	0	0.0627675	0	0.00477707	0.434188
ENSG00000197106	SLC6A17	0.416291	0.44858	0.531586	0.435902	0.612702	0.368445	0.412988	0.437727	0.265656	0.419433	0.302796	0.236216	0.219025	0.523347	0.49791	0.459847	0.431434	0.466534	0.527936	0.648348	0.458512	0.52693
ENSG00000139910	NOVA1	0.416166	0.822165	0.871771	0.710711	0.520423	0.339745	0	0.790677	0.58524	0.214589	0.719936	0.610665	0.689108	0.82789	0.790368	0	0	0	0	0.182562	0.678279	0
ENSG00000167447	SMG8	0.416054	0	0.143593	0	0	0	0	0.0372256	0	0.0896688	0	0	0	0.185272	0	0	0	0	0	0.288154	0.242278	0
ENSG00000172020	GAP43	0.415945	0.46868	0.41025	0.392161	0	0	0.372557	0.42454	0.51122	0.463077	0.462816	0.435926	0.288015	0.369234	0.457905	0.457886	0.422157	0.416123	0.416213	0.413246	0.455985	0.425179
ENSG00000168772	CXXC4	0.415862	0.600906	0.445181	0.643136	0.392062	0.276813	0.40537	0.455969	0.610393	0.60225	0.445099	0.375867	0.591369	0.573192	0.446738	0	0	0.52501	0	0.445773	0.414992	0.444795
ENSG00000175352	NRIP3	0.415756	0.453322	0.378935	0.382665	0.48289	0.448353	0.449466	0.217168	0	0.428571	0.0720124	0	0.339632	0.433279	0.415613	0	0.0484594	0.42363	0.654454	0.58064	0.426826	0.848272
ENSG00000008277	ADAM22	0.415456	0.416655	0.457537	0.390414	0.312334	0.0747477	0.273173	0.511096	0.414503	0.441945	0.397599	0.242563	0.403636	0.426332	0.420294	0.472112	0.38507	0.406127	0.338726	0.528058	0.406026	0.451448
ENSG00000135631	RAB11FIP5	0.415393	0.447859	0.633863	0.597288	0.577857	0.34912	0.45193	0.46305	0.307434	0.412574	0.449754	0.432475	0.364852	0.671192	0.509917	0.187852	0.0385146	0.14464	0.36816	0.400555	0.502804	0.423485
ENSG00000109184	DCUN1D4	0.415273	0.555304	0.502761	0.505862	0.324086	0	0.426631	0.549679	0.45827	0.339189	0.611708	0.418818	0.289039	0.493241	0.608914	0.484519	0.341682	0.411425	0.417255	0.35138	0.436487	0.071137
ENSG00000261115	TMEM178B	0.415151	0.312665	0.564142	0.252145	0	0.241673	0.202233	0.368135	0.282494	0.187338	0.3005	0.0161889	0.0810829	0.480491	0.494195	0.596504	0.31583	0.341116	0.592806	0.571845	0.588392	0.487779
ENSG00000157881	PANK4	0.414957	0.548349	0.525288	0	0.604213	0.0844944	0	0.575496	0.0905403	0.473882	0	0	0.802316	0.532096	0.564758	0.0754606	0	0	0	0.041813	0.554026	0
ENSG00000177169	ULK1	0.414872	0.288579	0.454652	0.458689	0.317392	0.283886	0.20941	0.4579	0.0693498	0.352307	0.388928	0.0896032	0.0437834	0.449047	0.304372	0.237195	0.0113819	0.325121	0.309537	0.313884	0.375858	0.274843
ENSG00000130881	LRP3	0.414784	0.427139	0.551514	0.355576	0.282078	0.360691	0.301369	0.581607	0.379291	0.401824	0.397467	0.40466	0.374417	0.61249	0.474749	0.417393	0.341489	0.363663	0.404857	0.580483	0.42353	0.390426
ENSG00000189299	FOXR2	0.41478	0	0.826449	0	0	0	0	0.373779	0.73998	0.315414	0.873246	0.315722	0	0.487015	0.62171	0	0	0.311354	0	0.0542212	0.218262	0
ENSG00000155511	GRIA1	0.414651	0.31861	0.339727	0.0119676	0	0.221471	0	0.334325	0.0659889	0	0.391552	0	0.224212	0.281088	0.409299	0.545515	0.511774	0.429836	0.708823	0.554842	0.293892	0.382257
ENSG00000176293	ZNF135	0.414465	0.445292	0.495351	0.0095405	0	0	0.426596	0.0115187	0	0	0.0988166	0	0.613149	0.42467	0.0790712	0.146937	0.0279334	0	0.267317	0.520082	0.0531836	0.348054
ENSG00000033627	ATP6V0A1	0.414352	0.33637	0.400027	0.4077	0.428604	0.241291	0.373249	0.37423	0.358525	0.33694	0.307327	0.136102	0.289103	0.429089	0.426828	0.432126	0.307448	0.420017	0.427401	0.533118	0.399605	0.434154
ENSG00000152332	UHMK1	0.41377	0.458043	0.440982	0.56796	0.413796	0.212281	0.458289	0.453412	0.400196	0.363803	0.43143	0.395759	0.309864	0.456135	0.444274	0.402353	0.253209	0.46862	0.436408	0.399229	0.460461	0.463791
ENSG00000253368	TRNP1	0.413329	0.459155	0.464574	0.299356	0.581265	0.385094	0.29185	0.519442	0.0244101	0.449173	0.246475	0	0.22833	0.555095	0.417072	0.349694	0.237299	0.417933	0.465406	0.431763	0.473274	0.490929
ENSG00000188730	VWC2	0.413073	0.736303	0.271414	0.298064	0.321143	0	0.0983067	0.443843	0.408429	0.581322	0.583741	0.450476	0	0.365108	0.333853	0	0	0	0	0	0.453297	0.816958
ENSG00000086300	SNX10	0.412896	0.373782	0.355031	0.282514	0.37481	0	0.447636	0.292397	0.1162	0.0258036	0.149472	0.106923	0	0.215894	0.349215	0.449312	0.446004	0.463929	0.433296	0.405548	0.416619	0.493475
ENSG00000106976	DNM1	0.41269	0.481038	0.554175	0.337377	0.530233	0.277075	0.207195	0.47421	0.430939	0.452991	0.415942	0.345173	0.419977	0.555259	0.449325	0.451447	0.391879	0.421763	0.526223	0.492995	0.450126	0.407181
ENSG00000073969	NSF	0.412366	0.460911	0.477647	0.424746	0.43208	0.319216	0.28155	0.440349	0.437439	0.44156	0.442061	0.400282	0.412082	0.483235	0.441694	0.465258	0.411023	0.413661	0.502716	0.40414	0.431626	0.410696
ENSG00000008735	MAPK8IP2	0.412365	0.393679	0.451574	0.450361	0.450679	0.368791	0.441695	0.441078	0.385504	0.420426	0.41821	0.302576	0.30998	0.470959	0.419081	0.42922	0.396911	0.425172	0.458291	0.429203	0.450233	0.4157
ENSG00000050438	SLC4A8	0.412232	0.577134	0.656396	0.562182	0.572127	0.344952	0	0.575067	0.269472	0.311376	0.357866	0.378567	0.0497995	0.71967	0.6443	0.407231	0.248871	0.354184	0.381688	0.574809	0.621934	0.381385
ENSG00000174996	KLC2	0.411642	0.426011	0.440611	0.428138	0.439906	0.391841	0.347545	0.523711	0.278117	0.441914	0.39192	0.397473	0.463503	0.515138	0.436353	0.398483	0.301461	0.408156	0.417824	0.500264	0.414193	0.359645
ENSG00000083544	TDRD3	0.411475	0	0.0398897	0.219298	0	0.0625843	0	0.0346427	0.0454666	0	0	0	0	0.231089	0	0	0	0	0.0717743	0.116588	0.267989	0
ENSG00000176125	UFSP1	0.411442	0.521362	0.36658	0.549827	0.442583	0.198845	0.645255	0.420206	0.278276	0.186957	0.363148	0.296298	0.303237	0.430738	0.446014	0	0	0	0.21729	0	0.412766	0.26024
ENSG00000137486	ARRB1	0.411431	0.405262	0.569551	0.280298	0.392565	0.299723	0	0.432067	0.307616	0.409261	0.355581	0.120721	0.458852	0.562018	0.486559	0.166303	0.168073	0.378471	0.246106	0.120057	0.409892	0.314595
ENSG00000118200	CAMSAP2	0.411368	0.317328	0.39397	0.360807	0.316335	0.0268082	0.430467	0.354858	0.285264	0.425732	0.286783	0.151962	0.177846	0.326583	0.328963	0.407328	0.0649575	0.381358	0.508286	0.255057	0.3736	0.393601
ENSG00000100401	RANGAP1	0.411116	0.390175	0.432114	0.39634	0.425953	0.192783	0.419895	0.42936	0.448163	0.455045	0.430388	0.32259	0.274998	0.438356	0.417195	0.406394	0.287224	0.432836	0.433208	0.40336	0.398372	0.447578
ENSG00000179532	DNHD1	0.410999	0.591164	0	0.0505257	0.111416	0	0.250329	0.0718311	0.115679	0	0	0	0	0.0318442	0.0703764	0.337887	0	0.0807359	0	0.0237791	0	0
ENSG00000185716	C16orf52	0.410862	0.193296	0.391842	0.659346	0.149453	0.436598	0.445338	0.322353	0.186604	0.256083	0.284719	0	0.0686497	0.412428	0.386048	0.226164	0	0.202799	0.269596	0.299757	0.390731	0.418055
ENSG00000141371	C17orf64	0.4107	0	0	0.055588	0	0	0	0.0716828	0.0153726	0	0.173793	0	0	0	0	0.0847305	0	0.132846	0	0.0119694	0.717745	0
ENSG00000118402	ELOVL4	0.410628	0.414614	0.391215	0.646471	0.418955	0.556653	0.455644	0.378982	0.268884	0.148422	0.352651	0.162558	0.456717	0.340908	0.244366	0.31855	0.0225339	0.0205062	0.352982	0.401478	0.306296	0.389784
ENSG00000040933	INPP4A	0.410402	0.323125	0.370779	0.41129	0.382067	0	0.415359	0.375958	0.251164	0.311999	0.340317	0.183627	0.214325	0.401477	0.389427	0.394664	0.326963	0.397078	0.38655	0.41021	0.379692	0.236692
ENSG00000106723	SPIN1	0.410359	0.316309	0.357477	0.599029	0.283984	0.366806	0.425416	0.357834	0.402698	0.272931	0.365412	0.334382	0.0997995	0.393882	0.434109	0.381232	0.270705	0.374921	0.383208	0.255074	0.350193	0.30914
ENSG00000198780	FAM169A	0.409936	0.423273	0.423544	0.638722	0	0.0847565	0.474332	0.444668	0.497311	0.443478	0.439247	0.391703	0.392899	0.410312	0.517045	0.336214	0.343186	0.329351	0.282883	0.411546	0.480202	0.444297
ENSG00000111530	CAND1	0.409692	0.399136	0.561593	0.408074	0.31513	0.0465728	0.423674	0.420145	0.330011	0.374344	0.39356	0.380217	0.32554	0.439913	0.425268	0.32567	0.167441	0.302575	0.341109	0.284833	0.405493	0.361118
ENSG00000236279	CLEC2L	0.409546	0.444265	0.651259	0.156252	0.657976	0.308773	0	0.46722	0.240235	0.450372	0	0.263968	0.40627	0.743659	0.460855	0.319209	0.00235686	0.0989153	0.414017	0.556741	0.555556	0.430025
ENSG00000188191	PRKAR1B	0.409533	0.453651	0.452476	0.452727	0.432491	0.253267	0.417946	0.4595	0.466908	0.449505	0.463875	0.440269	0.376452	0.460348	0.468249	0.469884	0.415413	0.449975	0.424431	0.442375	0.452186	0.463875
ENSG00000024862	CCDC28A	0.409447	0.42541	0.377264	0.349079	0.332249	0.142365	0.199825	0.525902	0.508529	0.341616	0.489009	0.566496	0.322062	0.426377	0.406897	0.266778	0.223552	0.292714	0.396472	0.401257	0.414258	0.161203
ENSG00000178773	CPNE7	0.409261	0	0	0	0	0	0.817961	0	0.30304	0.133393	0.0284762	0	0	0	0.127211	0.395816	0.782383	0.821814	0.891804	0.374067	0	0.584856
ENSG00000084710	EFR3B	0.409134	0.561866	0.582658	0.328584	0.611361	0.329387	0.464095	0.580686	0.173833	0.403489	0.508311	0.259774	0.438472	0.580536	0.383453	0.213521	0.193087	0.321569	0.512161	0.277116	0.374486	0.174245
ENSG00000137261	KIAA0319	0.409077	0.49596	0.297503	0.535185	0.371954	0	0.530683	0.52394	0.0920375	0.151213	0.160848	0.179454	0.000534759	0.108787	0.286636	0.379377	0.418136	0.472351	0.374595	0.701166	0.403427	0.396344
ENSG00000090661	CERS4	0.408971	0.353229	0.289585	0.400306	0.234106	0	0.315901	0.38774	0.417388	0.423774	0.397344	0.367963	0.179813	0.324407	0.406408	0.260189	0.353271	0.364121	0.206534	0.37923	0.25978	0.419142
ENSG00000198513	ATL1	0.408886	0.370489	0.297421	0.608905	0.319886	0.14008	0.451671	0.332581	0.333922	0.220363	0.385259	0.098861	0.000802139	0.22933	0.337592	0.415856	0.248365	0.331021	0.361215	0.530958	0.269192	0.0302075
ENSG00000162873	KLHDC8A	0.408699	0.581898	0.588157	0.338676	0.672577	0.159087	0.00574926	0.622955	0.659701	0.46341	0.466738	0.472505	0.155618	0.681152	0.640692	0.507592	0	0.201894	0.209981	0.00398979	0.576588	0
ENSG00000130477	UNC13A	0.408155	0.201301	0.369431	0.111653	0.315468	0.321237	0.303068	0.265551	0.0985037	0.254466	0.292664	0	0.317481	0.381866	0.371695	0.642477	0.352676	0.397526	0.583638	0.598924	0.320093	0.423491
ENSG00000127824	TUBA4A	0.407913	0.395541	0.546992	0.401461	0.491529	0.216521	0.356494	0.513711	0.341513	0.357779	0.426553	0.342724	0.293453	0.592992	0.437351	0.587093	0.383932	0.394928	0.529039	0.501611	0.445394	0.369803
ENSG00000104361	NIPAL2	0.407579	0.358076	0.421538	0.443812	0.414003	0	0.492568	0.36568	0.382283	0.40381	0.373289	0.105448	0	0.405429	0.317909	0	0	0	0	0	0.376128	0.000649245
ENSG00000175931	UBE2O	0.406989	0.378617	0.436827	0.50431	0.42685	0.371461	0.444679	0.472581	0.358191	0.368142	0.359772	0.275247	0.33671	0.485995	0.43196	0.416039	0.271566	0.426097	0.412679	0.486191	0.430489	0.413598
ENSG00000144834	TAGLN3	0.406948	0.341265	0.350376	0.1377	0.411744	0	0	0.29036	0.380344	0.404456	0.32489	0.299044	0.168717	0.313374	0.338482	0.3247	0.326679	0.28658	0.381906	0.234717	0.32629	0.139479
ENSG00000185742	C11orf87	0.406817	0.273318	0.0829844	0.388847	0.528302	0.315008	0	0.26875	0.219084	0.009634	0	0	0	0.344245	0.116638	0.395275	0	0.349412	0.0848014	0.585154	0.179436	0.611851
ENSG00000186487	MYT1L	0.406652	0.413909	0.37683	0.407705	0.396226	0.156434	0.200871	0.399892	0.524321	0.527459	0.383015	0.386027	0.499045	0.379009	0.330753	0.513973	0.444238	0.435525	0.464079	0.421197	0.384455	0.449142
ENSG00000109991	P2RX3	0.406572	0	0.54791	0	0	0	0.0956973	0	0	0.0871882	0.112261	0	0	0	0.0927271	0.341446	0	0	0.20466	0.0270906	0	0
ENSG00000145147	SLIT2	0.40636	0.260107	0.304441	0.606949	0.313768	0	0.0605285	0.429913	0.0913902	0	0.391499	0.352222	0.178903	0.364664	0.297777	0.366935	0.78733	0.722701	0.775537	0.754977	0	0
ENSG00000204442	FAM155A	0.406311	0.448199	0.427617	0.533977	0.206371	0.308825	0.398751	0.433467	0.368672	0.420601	0.410041	0.455912	0.576202	0.501209	0.448326	0.475259	0.399432	0.452932	0.429123	0.608445	0.40616	0.504563
ENSG00000139990	DCAF5	0.405889	0.339804	0.340456	0.492372	0.104184	0	0.493563	0.182044	0.144245	0.208702	0.35138	0	0.0784091	0.38627	0.280257	0.259675	0.04639	0.326926	0.378519	0.395891	0.38026	0.39707
ENSG00000143740	SNAP47	0.405526	0.431474	0.436691	0.387892	0.393063	0.0721194	0.366953	0.431761	0.408788	0.400305	0.430772	0.384979	0.198529	0.443089	0.446092	0.369089	0.318749	0.336373	0.36359	0.36792	0.418533	0.422232
ENSG00000168993	CPLX1	0.405352	0.39254	0.676866	0.42296	0.593922	0.435215	0.287571	0.454787	0	0.431654	0.122011	0	0.433909	0.68216	0.512049	0.351875	0	0.210921	0.432319	0.460934	0.619938	0.577347
ENSG00000144406	UNC80	0.40501	0.455379	0.431501	0.591572	0.374432	0.225758	0.373509	0.517071	0.457833	0.474428	0.435687	0.394628	0.413765	0.467084	0.45889	0.460904	0.306194	0.407559	0.441013	0.576941	0.444379	0.381589
ENSG00000113163	COL4A3BP	0.404923	0.466345	0.375216	0.569383	0.141879	0.29897	0.555911	0.384093	0.203605	0.015395	0.320802	0.303974	0.0465909	0.379788	0.407205	0.0383339	0.0103472	0.290412	0.160682	0.276245	0.389217	0.194542
ENSG00000186472	PCLO	0.404752	0.387484	0.423189	0.455151	0.350382	0.326181	0.415517	0.294141	0.391546	0.428429	0.341788	0.244485	0.276411	0.418796	0.42601	0.438589	0.378147	0.390916	0.513288	0.422957	0.426894	0.75023
ENSG00000102181	CD99L2	0.404733	0.341134	0.409601	0.549959	0.361515	0.389548	0.43265	0.437757	0.301664	0.182291	0.411224	0.0934861	0.263912	0.414524	0.422531	0.310757	0.137319	0.318019	0.226066	0.416628	0.432039	0.297243
ENSG00000104497	SNX16	0.404623	0.392974	0.307696	0.39192	0.275444	0.0393188	0.391579	0.249242	0.262804	0.344047	0.0467869	0.0407602	0.140997	0.270821	0.184771	0.195863	0.00919752	0.166224	0.166929	0.299609	0.285676	0.16024
ENSG00000022355	GABRA1	0.404395	0.729213	0.861805	0.371131	0.33281	0	0	0.675507	0.724465	0.866926	0.434788	0.537411	0.764055	0.745173	0.63221	0.529906	0	0.149631	0.0806141	0.75417	0.681224	0.552432
ENSG00000101298	SNPH	0.40434	0.398471	0.610467	0.416205	0.581012	0.413108	0.376783	0.631764	0.223896	0.368009	0.391665	0.200495	0.343602	0.652955	0.453268	0.44078	0.416877	0.451481	0.594653	0.604739	0.433205	0.371941
ENSG00000114631	PODXL2	0.404025	0.482925	0.46642	0.420261	0.402721	0.140875	0.36449	0.473258	0.473276	0.471548	0.553792	0.46251	0.369478	0.469036	0.474346	0	0	0	0.2508	0.179933	0.445383	0.409624
ENSG00000005884	ITGA3	0.403821	0.379624	0.299352	0.525927	0.568566	0	0.398141	0.418496	0.309166	0.391501	0.167314	0.392028	0	0.395017	0.359477	0	0	0	0.0878492	0.320738	0.391635	0.316642
ENSG00000155744	FAM126B	0.403506	0.537019	0.598196	0.582067	0.405355	0.322848	0.35862	0.457538	0.327928	0.407626	0.402183	0.375052	0.306735	0.584269	0.441547	0.404799	0.34793	0.444387	0.428951	0.525951	0.432573	0.438493
ENSG00000151320	AKAP6	0.40298	0.394974	0.37571	0.507015	0.275103	0.166473	0.441661	0.400478	0.321397	0.363189	0.369768	0.378184	0.363838	0.432137	0.347955	0.437517	0.387762	0.41968	0.42952	0.386224	0.373168	0.375065
ENSG00000132563	REEP2	0.402806	0.370292	0.41314	0.440988	0.381914	0	0.381769	0.434522	0.359943	0.343864	0.389145	0.332122	0.157516	0.430121	0.377965	0.441425	0.261774	0.393206	0.428015	0.579566	0.363408	0.394372
ENSG00000185519	FAM131C	0.402319	0.441039	0.828136	0.218166	0.833061	0.618417	0.0159032	0.457107	0.457962	0.213722	0.340338	0.269748	0	0.721548	0.586119	0	0	0	0	0	0.633725	0.404607
ENSG00000171951	SCG2	0.402272	0.476839	0.461601	0.478574	0.407982	0.29216	0.490205	0.450867	0.488206	0.485649	0.456328	0.476081	0.442498	0.435929	0.462414	0	0.0501265	0	0	0.245442	0.478457	0.43504
ENSG00000100321	SYNGR1	0.402002	0.42151	0.440381	0.380834	0.408601	0.244067	0.35449	0.41365	0.337587	0.317178	0.351095	0.275173	0.181083	0.448355	0.430296	0.358288	0.285451	0.412483	0.426914	0.491933	0.424452	0.404802
ENSG00000154917	RAB6B	0.401951	0.381981	0.426054	0.360442	0.428859	0.0925147	0.357738	0.383815	0.329826	0.359103	0.286192	0.264128	0.210896	0.414137	0.412692	0.453487	0.354716	0.421008	0.487493	0.492242	0.420691	0.447791
ENSG00000134121	CHL1	0.4019	0.410127	0.342329	0.622606	0	0.3031	0.42742	0.0681696	0.307511	0.204123	0.399776	0.0881111	0	0.141802	0.280305	0.301597	0.256997	0.422235	0.0708172	0.406636	0.327338	0.372327
ENSG00000109265	KIAA1211	0.401844	0.319284	0.376459	0.590519	0.306412	0.216258	0.584821	0.32287	0.369999	0.416714	0.439581	0.319777	0.0824198	0.389251	0.371789	0	0.257467	0.366431	0.444216	0	0.405876	0.561865
ENSG00000134115	CNTN6	0.401742	0.405644	0.431097	0.154575	0.0444605	0.0550562	0.341265	0.401222	0.753813	0.915503	0.314891	0.563421	0.7469	0.199008	0.25449	0.433446	0.29795	0.309627	0	0.814638	0.13732	0.254362
ENSG00000007402	CACNA2D2	0.40158	0.577687	0.682104	0.630332	0.443612	0.419994	0.136833	0.486625	0.470232	0.463823	0.47944	0.465167	0.604535	0.692705	0.675204	0	0	0	0	0.159244	0.710824	0
ENSG00000196227	FAM217B	0.401351	0.48464	0.559432	0.464029	0.35873	0	0.380682	0.509281	0.542533	0.591806	0.416195	0.330824	0.60231	0.518389	0.447169	0.408047	0.378787	0.449754	0.415066	0.494721	0.49441	0.442223
ENSG00000124493	GRM4	0.401204	0	0.0594508	0.499762	0.284446	0	0.534586	0.567457	0	0.408249	0.43166	0.162108	0.280284	0.277684	0	0	0	0	0	0.250102	0	0
ENSG00000118276	B4GALT6	0.401003	0.374987	0.378194	0.391312	0.362078	0	0.371361	0.419503	0.359618	0.422503	0.415762	0.334014	0.300718	0.422995	0.413734	0.450265	0.333684	0.414768	0.446165	0.455876	0.414822	0
ENSG00000163032	VSNL1	0.400539	0.463812	0.489974	0.405869	0.451777	0.281974	0.378166	0.530687	0.428511	0.397448	0.451271	0.453392	0.441104	0.467899	0.457956	0.447289	0.375937	0.407586	0.410979	0.446528	0.455789	0.338355
ENSG00000197959	DNM3	0.400517	0.405035	0.440359	0.600285	0.302525	0.0313288	0.394559	0.34908	0.360132	0.516516	0.417763	0.330719	0.0754011	0.443801	0.424853	0	0	0.0307335	0	0	0.439759	0.447183
ENSG00000111641	NOP2	0.400398	0.14802	0	0	0.0809249	0	0.0726076	0	0.169641	0	0	0.0654163	0	0.0901621	0	0.162191	0	0	0.205531	0.332668	0.126526	0.279221
ENSG00000241878	PISD	0.399816	0.382265	0.3228	0.32852	0.296763	0	0	0.437755	0.309719	0.0349051	0.379322	0.380541	0.344497	0.334315	0.358237	0.0193285	0	0	0.198567	0.191417	0.349237	0.200316
ENSG00000119242	CCDC92	0.399683	0.460585	0.460048	0.432746	0.425856	0.173946	0.432058	0.545478	0.396253	0.395758	0.449129	0.444194	0.368205	0.47198	0.448144	0.169361	0	0.266807	0.333779	0.31637	0.417135	0.385401
ENSG00000167378	IRGQ	0.399619	0.315121	0.437253	0.336196	0.399444	0.345277	0.365123	0.395812	0.122277	0.276826	0.24017	0.116525	0.126136	0.372774	0.427857	0.397363	0.0727283	0.423354	0.412815	0.420596	0.422388	0.489577
ENSG00000272333	KMT2B	0.399466	0	0	0.219391	0.153182	0	0.235114	0.214936	0	0	0	0	0	0.0840239	0.203333	0.181498	0.312417	0.176358	0.195197	0.286274	0.105519	0.0123357
ENSG00000166405	RIC3	0.399121	0.37067	0.392092	0.303632	0.100627	0.188105	0.362412	0.393678	0.316527	0.26897	0.330034	0.39047	0.168771	0.409135	0.373654	0.368478	0.264967	0.253461	0.370351	0.422979	0.39735	0.409235
ENSG00000119772	DNMT3A	0.398741	0.128662	0.336793	0.0843103	0.320188	0.189264	0	0.111101	0	0.227138	0.0318489	0	0.173061	0.295759	0.0320417	0.152547	0	0.0766529	0.12293	0.00105915	0.325151	0
ENSG00000106236	NPTX2	0.398379	0.00782986	0	0.0826724	0	0	0	0.383005	0.1756	0.123821	0.839498	0.817398	0	0	0	0.822125	0.394725	0.33734	0	0	0	0
ENSG00000144815	NXPE3	0.398051	0.326223	0.385216	0.521733	0.0961131	0.631833	0.616217	0.666994	0.135907	0.336482	0.352482	0.274172	0.50851	0.40011	0.228479	0.17893	0.0812455	0	0.122043	0.38135	0.180059	0.303418
ENSG00000122679	RAMP3	0.397612	0	0	0	0	0.630475	0	0	0	0	0.0124238	0.00838239	0	0	0	0	0	0	0	0.775231	0	0
ENSG00000112584	FAM120B	0.397442	0.411627	0.376429	0.511619	0.428098	0.323738	0.335318	0.477426	0.357714	0.362284	0.341846	0.185967	0.393664	0.431526	0.538428	0.304041	0.0319614	0.345491	0.194809	0.34306	0.347946	0.218258
ENSG00000111371	SLC38A1	0.397347	0.555357	0.60035	0.481534	0.408948	0.387767	0.441276	0.465638	0.363482	0.409283	0.428063	0.342911	0.309589	0.615519	0.506165	0.0297243	0	0.0291322	0.149526	0.345367	0.515979	0.467435
ENSG00000047056	WDR37	0.397197	0.427222	0.580382	0.583418	0.365142	0	0.487652	0.405231	0.396365	0.434395	0.426393	0.325285	0.344066	0.51078	0.545911	0.215113	0.0263279	0.290235	0.222192	0.19982	0.445964	0.430611
ENSG00000153253	SCN3A	0.397097	0.455791	0.337769	0.589098	0	0.0303827	0.461924	0.210731	0.46544	0.412232	0.432256	0.45627	0.270889	0.0939839	0.431703	0.459472	0.216844	0.194665	0.356494	0.239639	0.455821	0.418239
ENSG00000163577	EIF5A2	0.396549	0.372459	0.397524	0.650477	0.365226	0.474877	0.522009	0.296265	0	0.210359	0.0189309	0	0	0.481387	0.331173	0.0568003	0	0.111905	0.273603	0.242989	0.314706	0.409173
ENSG00000108599	AKAP10	0.396499	0	0.289426	0	0.022447	0	0.127242	0.00766265	0	0	0	0.130798	0	0	0.170302	0	0.0102447	0	0.00706506	0.0674753	0	0.0314478
ENSG00000067445	TRO	0.396326	0.554849	0.45441	0.514525	0.346079	0.105331	0.41184	0.475249	0.566192	0.436766	0.503255	0.466556	0.42658	0.456819	0.533713	0.43177	0.338848	0.39238	0.446567	0.424757	0.46724	0.436435
ENSG00000104381	GDAP1	0.395814	0.423037	0.438486	0.637815	0.311551	0.359863	0.497474	0.425433	0.270403	0.39532	0.348786	0.280988	0.373479	0.436775	0.413704	0.41787	0.352515	0.432952	0.412466	0.386066	0.399352	0.430308
ENSG00000100934	SEC23A	0.39552	0.402226	0.408091	0.376259	0.347422	0	0.430079	0.39618	0.327622	0.344038	0.307885	0.374965	0.114238	0.408903	0.44252	0.400279	0.329877	0.413747	0.430505	0.389475	0.431212	0.404258
ENSG00000136425	CIB2	0.395392	0.454286	0.456457	0.350434	0.454527	0	0.398192	0.432939	0.608559	0.477196	0.505947	0.466999	0	0.453424	0.515706	0	0.395025	0.0422521	0.40323	0	0.453227	0.37975
ENSG00000103034	NDRG4	0.395347	0.444715	0.440423	0.3297	0.410872	0.244113	0.268663	0.421082	0.412478	0.440481	0.388426	0.356893	0.398059	0.446566	0.434407	0.440364	0.346065	0.365818	0.423966	0.421524	0.440474	0.398143
ENSG00000155265	GOLGA7B	0.395329	0.274692	0.282722	0.400801	0.642915	0.145115	0.407525	0.636106	0.418614	0.36354	0.509531	0.458751	0.279829	0.40453	0.433651	0.534946	0.347901	0.422759	0.510624	0.43082	0.28137	0.205024
ENSG00000154059	IMPACT	0.395011	0.650861	0.657588	0.637173	0.390232	0.376359	0.451971	0.47536	0.476023	0.409024	0.586334	0.467589	0.283457	0.554948	0.667827	0.220019	0.161474	0.416357	0.310246	0.373134	0.572907	0.461175
ENSG00000089199	CHGB	0.394622	0.415181	0.426094	0.248039	0.445259	0.303895	0.448344	0.397972	0.343406	0.420003	0.310565	0.14794	0.323933	0.430284	0.413385	0.580464	0.181022	0.173187	0.551824	0.419124	0.38116	0.327168
ENSG00000182674	KCNB2	0.393765	0.330564	0.327427	0.439819	0.113106	0.461197	0.384406	0.431505	0.199059	0	0.031661	0.303328	0	0.397296	0.288068	0.157315	0	0.441563	0.339727	0.419361	0.419619	0.450036
ENSG00000142686	C1orf216	0.393484	0.30416	0.453989	0.391037	0.37928	0.344845	0.226879	0.432183	0.289842	0.494949	0.32916	0.0973114	0.21648	0.416187	0.286294	0.403713	0.248635	0.364377	0.38375	0.332946	0.348815	0.37179
ENSG00000111912	NCOA7	0.393275	0.293639	0.347573	0.551819	0.358277	0.376313	0.378926	0.385349	0.353991	0.365272	0.430495	0.397691	0.177421	0.30316	0.411511	0.423605	0.415825	0.432549	0.441798	0.366815	0.385245	0.419935
ENSG00000116273	PHF13	0.393091	0.170168	0.0482247	0.14907	0	0.149096	0.291635	0.248694	0.0993416	0	0.18737	0.460158	0	0.216534	0	0.238262	0	0.203948	0.0501545	0.206443	0.149819	0.0134313
ENSG00000120341	SEC16B	0.392874	0	0.165536	0	0.836286	0	0.0979228	0	0.00843984	0.290217	0	0	0	0	0	0.189532	0	0.363949	0.563129	0	0	0
ENSG00000149260	CAPN5	0.392821	0	0.0859932	0.108205	0.516644	0	0.377143	0	0	0.0560612	0.160336	0.0347453	0	0.0293164	0.00936103	0	0.0806828	0.444513	0.47795	0	0.124899	0.415329
ENSG00000166676	TVP23A	0.392155	0.384103	0.629032	0.297713	0.29783	0	0.303358	0.410402	0.231377	0.017622	0.362753	0.217074	0	0.502206	0.408747	0.335887	0.0774374	0.379191	0.342357	0.480367	0.557342	0.466948
ENSG00000136854	STXBP1	0.391889	0.440888	0.433265	0.404534	0.405393	0.229605	0.319557	0.435388	0.434109	0.433373	0.438839	0.373147	0.397188	0.443925	0.44749	0.438674	0.365689	0.400716	0.419837	0.41023	0.434169	0.400725
ENSG00000128596	CCDC136	0.391583	0.429255	0.430042	0.386911	0.436997	0.395448	0.392955	0.462516	0.355769	0.434607	0.420077	0.371892	0.0600936	0.464724	0.462616	0.00596797	0	0.151803	0	0.216407	0.444245	0.399253
ENSG00000003096	KLHL13	0.391355	0.417523	0.391756	0.40117	0.219355	0	0.0118694	0.393056	0.41441	0.438996	0.392348	0.105768	0	0.189153	0.264483	0.289913	0.228766	0	0	0	0.435911	0.1414
ENSG00000137802	MAPKBP1	0.391133	0.0610213	0.197448	0.0814643	0.277678	0	0	0.133113	0.24273	0.404014	0	0.0603982	0.357538	0.438411	0.192266	0.497093	0.281971	0.351882	0.507334	0.119962	0.113871	0.177461
ENSG00000102678	FGF9	0.391089	0.472037	0.711697	0	0.420309	0	0	0.56317	0.207844	0.58342	0.251059	0.243193	0.554723	0.714447	0.404295	0.223202	0	0	0.190669	0.402322	0.413308	0.524579
ENSG00000174282	ZBTB4	0.390947	0.380398	0.38723	0.326941	0.32429	0.120164	0.306628	0.382079	0.00968732	0.0594016	0.0482901	0.00435116	0.115508	0.423163	0.397307	0.144843	0.049954	0.0583161	0.265455	0.312191	0.364929	0.472745
ENSG00000166747	AP1G1	0.390931	0.231659	0.351534	0.367099	0.28149	0	0.383612	0.282505	0.234421	0.226229	0.403421	0.112234	0.309797	0.386729	0.380564	0.31567	0.129885	0.2113	0.3096	0.260461	0.372976	0.344508
ENSG00000072201	LNX1	0.390828	0.371502	0.379802	0.171824	0.303886	0	0.290219	0.59767	0.249486	0.3773	0.223481	0.452747	0.424717	0.392059	0.311074	0.370674	0	0.0186688	0.278307	0	0.12135	0.359468
ENSG00000091656	ZFHX4	0.390738	0.414863	0.600628	0.654283	0	0	0.650167	0.110864	0.85303	0.834159	0.599795	0.263034	0.648021	0.734019	0.540652	0	0	0	0	0	0.0417994	0
ENSG00000119899	SLC17A5	0.390694	0.11388	0.0495082	0.0393489	0.266416	0	0.00639837	0.0429313	0	0.00324361	0.162831	0	0.331636	0.0977774	0.191441	0.264677	0.343411	0	0.393983	0.450458	0.149218	0.040666
ENSG00000099365	STX1B	0.390633	0.453344	0.62146	0.613899	0.548454	0.392832	0.393997	0.577124	0.433099	0.448961	0.505252	0.411807	0.441892	0.647121	0.63858	0.43024	0.339262	0.411504	0.441055	0.483029	0.483071	0.444978
ENSG00000182013	PNMA8A	0.390409	0.396845	0.355972	0.342918	0	0	0.43492	0.369464	0.566069	0.446057	0.449788	0.342244	0.24426	0.363026	0.425365	0.459352	0.431251	0.433823	0.419843	0.429712	0.438179	0.430998
ENSG00000153012	LGI2	0.390394	0.4289	0.671359	0.410903	0.561991	0.703339	0.220115	0.67406	0.0119413	0.500621	0.0230177	0.311967	0.483247	0.793856	0.499575	0.415953	0	0	0.194914	0.380564	0.697874	0.704185
ENSG00000165995	CACNB2	0.390299	0.491924	0.360901	0.372018	0.0240366	0	0.288497	0.583775	0.294027	0.483524	0.407184	0.392672	0.389741	0.347196	0.239565	0.284769	0.287092	0.274255	0.350383	0	0.377693	0.282458
ENSG00000183571	PGPEP1L	0.390251	0	0.668979	0	0	0	0	0	0.909287	0	0.320305	0.495191	0	0	0.766128	0	0	0	0.624053	0	0	0
ENSG00000185737	NRG3	0.390062	0.362445	0.295475	0.63073	0.227136	0	0.355466	0.301358	0.194557	0.259905	0.184868	0.122974	0	0.0317911	0.367776	0.559299	0.328981	0.56009	0.520097	0.455262	0.230422	0.0877792
ENSG00000118733	OLFM3	0.389704	0.791236	0.720039	0.631829	0	0	0.0329191	0.658686	0	0	0.431526	0.403557	0	0.443698	0.413502	0	0	0	0	0	0.533469	0
ENSG00000169435	RASSF6	0.38938	0.0919291	0.763616	0.00501363	0.447871	0	0.0867953	0.319612	0.305187	0.495921	0.0929551	0	0.843957	0.801008	0	0	0.374003	0	0	0.0650734	0.125032	0
ENSG00000040341	STAU2	0.389302	0.382481	0.434592	0.443241	0.432891	0.26892	0.429945	0.436841	0.394986	0.368042	0.42926	0.273294	0.252529	0.448614	0.456168	0.400257	0.358136	0.428372	0.433036	0.417337	0.447058	0.433233
ENSG00000057019	DCBLD2	0.389199	0.173839	0.309618	0.329001	0.0410405	0	0.0480805	0.340931	0	0.0792661	0.0903765	0	0	0.378342	0.394475	0.270643	0	0	0	0.0248907	0.36595	0
ENSG00000162927	PUS10	0.38917	0.166498	0	0	0.10501	0	0.130598	0.0531615	0	0.125484	0	0	0.276	0	0	0.438078	0	0	0.0114439	0.185995	0	0
ENSG00000083457	ITGAE	0.389002	0.5007	0.141917	0	0.469968	0	0	0.870938	0	0.190997	0.20695	0.185182	0	0.552702	0	0.000822626	0	0	0.0954151	0	0	0
ENSG00000159164	SV2A	0.388918	0.410799	0.450578	0.372063	0.352412	0.23791	0.285573	0.399327	0.364039	0.333111	0.403475	0.336093	0.268575	0.487678	0.452643	0.276942	0.206484	0.261332	0.306558	0.387826	0.401404	0.414558
ENSG00000119900	OGFRL1	0.388891	0.134421	0.193054	0.105754	0	0	0	0.196848	0.274489	0.408644	0.0528467	0.134502	0.334084	0.19913	0.228384	0.428657	0.431881	0.405072	0.639024	0.383801	0.124204	0.563555
ENSG00000169018	FEM1B	0.388474	0.361389	0.431023	0.357903	0.400186	0	0.425254	0.297417	0.371656	0.334643	0.360056	0.234102	0.170915	0.378983	0.365852	0.318082	0.116751	0.325676	0.420045	0.297452	0.453141	0.381368
ENSG00000125166	GOT2	0.388444	0.433312	0.562977	0.266287	0.555352	0.110177	0.18133	0.507179	0.257121	0.35567	0.312993	0.320341	0.38229	0.627599	0.44916	0.357474	0.0903081	0.324277	0.409919	0.463121	0.446802	0.437582
ENSG00000185565	LSAMP	0.388332	0.0229339	0.100299	0.366225	0.120405	0.162742	0.119243	0.345179	0.394401	0.228809	0.418015	0.387776	0.200535	0.323866	0.314292	0.260436	0	0.0965393	0.471348	0	0.250951	0.150243
ENSG00000188636	RTL6	0.387913	0.208376	0.238679	0.140648	0.295231	0.0875958	0.18564	0.347194	0.409485	0.157397	0.297165	0.23438	0.195314	0.31818	0.316602	0.517491	0.476237	0.390658	0.548915	0.391626	0.310997	0.296864
ENSG00000129910	CDH15	0.387212	0	0.0313092	0.150542	0.25877	0	0.182835	0.293934	0.72678	0.358499	0.729441	0.295888	0.31197	0	0.223454	0.242911	0	0.367914	0.0698381	0	0.282508	0
ENSG00000164070	HSPA4L	0.387164	0.574715	0.618864	0.55962	0.433449	0.312391	0.404386	0.60524	0.441711	0.454109	0.441923	0.407163	0.40234	0.639776	0.500921	0.250915	0.156473	0.311671	0.353632	0.394512	0.461869	0.449762
ENSG00000107742	SPOCK2	0.387115	0.397927	0.409857	0.41207	0.420841	0.235055	0.3324	0.410219	0.401319	0.377754	0.400072	0.360472	0.224254	0.44203	0.398251	0.388154	0.249517	0.338499	0.377021	0.37561	0.390121	0.473195
ENSG00000075340	ADD2	0.386912	0.430629	0.427388	0.347777	0.509827	0.100395	0.278028	0.405194	0.42923	0.448942	0.395713	0.31834	0.34165	0.422899	0.41457	0.460422	0.407048	0.380261	0.4539	0.514106	0.448431	0
ENSG00000184785	SMIM10	0.386815	0.518012	0.44015	0.467073	0.48458	0	0.402083	0.497435	0.549652	0.424178	0.619052	0.465194	0.020254	0.443489	0.639713	0.420508	0.342744	0.389778	0.452364	0.339452	0.47244	0.21697
ENSG00000091157	WDR7	0.386738	0.388574	0.550248	0.540127	0.309607	0	0.420948	0.509049	0.382209	0.357127	0.49529	0.282485	0.290241	0.427795	0.426268	0.457717	0.366769	0.496994	0.563354	0.409891	0.383577	0.400934
ENSG00000078053	AMPH	0.386677	0.192798	0.130067	0.544207	0.42051	0	0.378755	0.292937	0.186995	0.0436193	0.31395	0.0804965	0.0486631	0.08666	0.161477	0.448751	0.324514	0.479034	0.606047	0.292332	0.117831	0.41961
ENSG00000130822	PNCK	0.386601	0.461795	0.391886	0.416748	0	0	0.339094	0.45193	0.652572	0.463127	0.633341	0.467073	0.387038	0.340464	0.470894	0.412315	0.446975	0.344099	0.420652	0.00472544	0.447661	0.115675
ENSG00000069424	KCNAB2	0.386344	0.414421	0.583474	0.360478	0.61194	0.439386	0.0192946	0.608769	0.336694	0.406053	0.392304	0.214323	0.451432	0.670795	0.381106	0.445942	0.258877	0.311595	0.600575	0.534187	0.448289	0.330497
ENSG00000163904	SENP2	0.386175	0.361137	0.369387	0.160892	0.315543	0	0.156661	0.417406	0.205632	0.384728	0.291196	0.273512	0.346734	0.499335	0.34324	0.431418	0.235552	0.384583	0.362723	0.387681	0.378877	0.263901
ENSG00000198833	UBE2J1	0.386149	0.427991	0.417155	0.409448	0.37278	0	0.413517	0.39781	0.152881	0.282713	0.392929	0.243353	0.326455	0.549372	0.439364	0.224708	0.0597839	0.253658	0.321012	0.280017	0.400754	0.385851
ENSG00000184524	CEND1	0.386009	0.45304	0.51887	0.399398	0.454182	0.280623	0.325653	0.453968	0.407873	0.438106	0.406186	0.412247	0.330277	0.534788	0.462985	0.352276	0.192343	0.286086	0.402237	0.396018	0.464637	0.454336
ENSG00000169122	FAM110B	0.385995	0.0709234	0.0646433	0	0.412475	0	0	0.135149	0.361188	0.338085	0.381464	0	0.159486	0.212218	0.263966	0.357153	0.162078	0.13477	0.341695	0.227772	0.335252	0.147786
ENSG00000213047	DENND1B	0.385915	0.254681	0.26129	0.30154	0.143924	0.0530337	0.104917	0.385918	0.253349	0.239932	0.31047	0	0.482783	0.336615	0.191505	0	0	0.00281385	0.0908084	0.350075	0.0843299	0.112273
ENSG00000135472	FAIM2	0.385784	0.531854	0.498084	0.534616	0.403977	0.134987	0.306405	0.588845	0.451528	0.444051	0.530654	0.445371	0.318515	0.532929	0.493235	0.40887	0.348736	0.376072	0.380985	0.432792	0.425022	0.412279
ENSG00000183597	TANGO2	0.385493	0.4096	0.504342	0.401349	0.371485	0.238575	0.36358	0.537755	0.438065	0.439052	0.464809	0.396899	0.439332	0.492713	0.455436	0.362579	0.347067	0.315762	0.386815	0.359232	0.427413	0.352319
ENSG00000067840	PDZD4	0.385392	0.385439	0.37847	0.335587	0.329758	0	0.272587	0.0721736	0.345874	0.399266	0.202212	0.360485	0.268411	0.350414	0.283227	0.569915	0.399629	0.415353	0.535621	0.380202	0.391248	0.385896
ENSG00000080561	MID2	0.385349	0.595277	0.339414	0.652212	0	0	0.593646	0.276051	0.294142	0.244594	0.300832	0.386508	0.284603	0.395853	0.525823	0.120921	0.0172465	0	0	0	0.377131	0.389458
ENSG00000104756	KCTD9	0.385343	0.634273	0.798413	0.408552	0.529318	0.350079	0.430985	0.654001	0	0.158348	0.317643	0.159948	0	0.811943	0.683583	0	0	0	0	0.00642356	0.594343	0.167708
ENSG00000166206	GABRB3	0.385022	0.306812	0.340888	0.376285	0	0.343649	0.308344	0.421698	0.42364	0.356333	0.416463	0.388405	0.376462	0.338048	0.249303	0.638434	0.435997	0.485425	0.632683	0.597429	0.313464	0.448718
ENSG00000103249	CLCN7	0.384952	0.207587	0.272039	0	0.0836441	0.0231461	0.160413	0.292257	0.046221	0	0.243991	0.211516	0	0.319022	0.0997972	0.256882	0.0721977	0	0.325582	0.542573	0.120568	0.175206
ENSG00000139220	PPFIA2	0.384703	0.0724894	0.0454376	0.264377	0	0.230642	0.363933	0.0447728	0.398202	0.406553	0.161187	0	0	0.0223303	0.324632	0.59913	0.418857	0.376279	0.631599	0.442005	0.376456	0.350975
ENSG00000175893	ZDHHC21	0.384702	0.387745	0.354503	0.29512	0.352889	0	0.322749	0.375158	0.120972	0.0683095	0.231505	0.23272	0	0.365347	0.275054	0.323536	0.254843	0.341984	0.322731	0.390064	0.393476	0.292702
ENSG00000101290	CDS2	0.384685	0.398919	0.411429	0.385167	0.312473	0.175988	0.331745	0.406057	0.290073	0.297812	0.350192	0.352018	0.203008	0.411076	0.431451	0.332803	0.142447	0.208941	0.372308	0.399943	0.397693	0.402356
ENSG00000167778	SPRYD3	0.384231	0.374028	0.327341	0.357942	0.370456	0.284953	0.356189	0.397542	0.40107	0.371222	0.420575	0.315967	0.130214	0.364358	0.412102	0.414912	0.3689	0.37303	0.431252	0.322835	0.345301	0.413808
ENSG00000036257	CUL3	0.384197	0.327481	0.359672	0.496359	0.171969	0.343448	0.394596	0.297542	0.152408	0.13155	0.117674	0	0.120388	0.320344	0.316948	0.279001	0	0.0919102	0.302038	0.227639	0.301351	0.227673
ENSG00000177432	NAP1L5	0.38415	0.510431	0.44223	0.424794	0.388163	0.234756	0.346082	0.419828	0.470774	0.45006	0.455782	0.436287	0.375336	0.435549	0.456967	0	0.0214417	0.143233	0	0.153398	0.448228	0.431811
ENSG00000173442	EHBP1L1	0.384092	0.232988	0	0.0353824	0.170487	0	0.353504	0	0.408906	0	0.408515	0.278786	0	0	0.289072	0.421541	0.388329	0.377925	0.00421619	0.193378	0.060023	0.0671692
ENSG00000183715	OPCML	0.384043	0.374171	0.346864	0.0918327	0.235639	0	0.268082	0.330341	0.134136	0.000193648	0.291796	0.186588	0.54363	0.370933	0.387146	0.457891	0.480592	0.543098	0.593024	0.623803	0.315519	0.391168
ENSG00000006432	MAP3K9	0.383966	0.373175	0.643364	0.327918	0.497188	0	0.412012	0.384648	0	0.352172	0.148095	0.415781	0.322543	0.547545	0.441061	0.293468	0	0.462054	0.16586	0.626184	0.453685	0.568449
ENSG00000241945	PWP2	0.383934	0.0455478	0.155946	0.239835	0.0066474	0	0.138824	0.339167	0	0.160693	0.36638	0	0	0.285289	0.126503	0.358863	0.371604	0.0021645	0.430485	0.397048	0.29102	0.0717006
ENSG00000167114	SLC27A4	0.383825	0.286491	0.570348	0.46258	0.480487	0	0.22561	0.517873	0.083685	0.144738	0.29124	0.0255951	0.0907086	0.600561	0.373282	0.114098	0.240296	0.102925	0.224512	0.500225	0.439493	0.301224
ENSG00000084731	KIF3C	0.383728	0.496508	0.452491	0.28052	0.404957	0.188892	0.304325	0.388519	0.335991	0.366877	0.401425	0.253467	0.0624332	0.430675	0.393359	0.396343	0.359828	0.405254	0.439505	0.387241	0.424207	0.382135
ENSG00000123643	SLC36A1	0.383703	0.440889	0.627261	0.329727	0.527538	0.153864	0.397656	0.444825	0	0	0.171372	0.0319299	0.319463	0.605805	0.416274	0.227182	0.407708	0.468015	0.397149	0.573567	0.536284	0.246063
ENSG00000166111	SVOP	0.383683	0.37481	0.426857	0.554371	0.416364	0.0520395	0.415002	0.440903	0.503569	0.362613	0.456757	0.416168	0.330682	0.436332	0.451389	0.548284	0.370958	0.514986	0.567602	0.637497	0.413589	0.438545
ENSG00000204390	HSPA1L	0.383592	0	0	0	0	0	0	0	0	0	0	0	0	0	0	0.118865	0	0	0.317383	0	0	0
ENSG00000174373	RALGAPA1	0.383355	0.338412	0.370412	0.242219	0.305155	0.224705	0.355889	0.239707	0.2679	0.299296	0.286759	0.0136934	0.155545	0.382969	0.252602	0.342858	0.072143	0.191423	0.324807	0.397482	0.379823	0.358104
ENSG00000006210	CX3CL1	0.383277	0.423816	0.410106	0.314844	0.336687	0.168629	0	0.420936	0.503525	0.422551	0.408167	0.301275	0.488021	0.422722	0.375633	0.636547	0.421472	0.477638	0.551321	0.77519	0.409156	0.27987
ENSG00000101098	RIMS4	0.383163	0.415309	0.623161	0.362172	0.600702	0.382863	0.187226	0.441286	0.371617	0.49161	0.301726	0.199926	0.423298	0.581951	0.420132	0.274933	0	0.250359	0.143678	0.430204	0.57027	0.377844
ENSG00000134313	KIDINS220	0.383071	0.361211	0.387676	0.390027	0.166947	0	0.394976	0.386197	0.313962	0.212036	0.306659	0.255383	0.153676	0.35978	0.38536	0.216296	0.0289147	0.138813	0.310348	0.202877	0.346106	0.409691
ENSG00000242173	ARHGDIG	0.382915	0.442751	0.400769	0.400588	0.439856	0	0.409525	0.395761	0.476974	0.44888	0.471299	0.46151	0.285866	0.307545	0.472995	0.430209	0.436955	0.45505	0.470216	0.466341	0.457247	0.461769
ENSG00000153933	DGKE	0.382827	0.383693	0.572338	0.35848	0.336796	0.275299	0.365122	0.419114	0.22531	0.0271108	0.37426	0.0451753	0.500153	0.453586	0.403152	0.594793	0.209187	0.469217	0.562463	0.553494	0.394525	0.308839
ENSG00000156395	SORCS3	0.382784	0.326407	0.341328	0.353005	0	0	0.59519	0.381121	0.550389	0	0.399429	0.389394	0.00995989	0.267836	0.406828	0.36568	0	0.462648	0.305275	0.113997	0.597282	0.893041
ENSG00000170091	HGNC:24955	0.382629	0.424886	0.384277	0.368207	0.355487	0.161585	0.258977	0.379416	0.44495	0.431113	0.404056	0.354193	0.366485	0.394681	0.423132	0.440542	0.358139	0.391234	0.430121	0.428476	0.41271	0.405823
ENSG00000072062	PRKACA	0.382626	0.378296	0.394526	0.383987	0.412683	0	0.387957	0.382284	0.401275	0.379031	0.4286	0.323179	0.0576872	0.428343	0.444993	0.228133	0.289932	0.300244	0.311723	0.27812	0.391723	0.411804
ENSG00000102230	PCYT1B	0.382447	0	0	0.0216474	0.450345	0	0.0643179	0	0	0	0	0	0	0.118567	0.0815404	0.46785	0.39289	0.120292	0.492146	0	0.0263623	0.158205
ENSG00000125827	TMX4	0.382298	0.442724	0.439754	0.601589	0.28	0.290203	0.434613	0.430803	0.450873	0.336433	0.46124	0.43104	0.324789	0.443231	0.461812	0.367242	0.246856	0.340739	0.26542	0.414751	0.438918	0.358195
ENSG00000132294	EFR3A	0.382059	0.406481	0.396068	0.422728	0.656323	0.532762	0.282313	0.420163	0.00666603	0.304752	0.356817	0.223769	0.155414	0.44974	0.431212	0.303004	0.304527	0.415939	0.438479	0.55161	0.360509	0.0860653
ENSG00000013392	RWDD2A	0.381771	0.59736	0.507632	0.205372	0.354419	0	0.100927	0.471957	0.62661	0.276998	0.604231	0.522651	0.23072	0.386898	0.412428	0.202997	0.435362	0.137227	0.296399	0.365749	0.424118	0
ENSG00000054356	PTPRN	0.381751	0.388725	0.36507	0.432558	0.399493	0.111228	0.426848	0.394515	0.384559	0.33212	0.417848	0.290333	0.256945	0.381385	0.428003	0.455194	0.362911	0.416256	0.447267	0.571016	0.394347	0.444715
ENSG00000179542	SLITRK4	0.38162	0.634822	0.503836	0.566131	0	0	0.392477	0.542391	0.251711	0.563671	0.3874	0.432582	0.565417	0.578581	0.566676	0.590094	0.690202	0.418167	0.335731	0.760034	0.658103	0.321336
ENSG00000186648	CARMIL3	0.381521	0.632352	0.432645	0.356638	0.41907	0.245252	0.394976	0.58292	0.438011	0.403452	0.465248	0.409622	0.0263369	0.458062	0.507055	0.11002	0	0.248888	0.361861	0.308864	0.456108	0.388919
ENSG00000183654	2020-03-11	0.381504	0.00272782	0.0447976	0	0.599282	0	0	0.103354	0	0	0.139874	0	0	0.355164	0.122647	0.260948	0	0.00965909	0.00379011	0.544766	0	0.359862
ENSG00000152402	GUCY1A2	0.381395	0	0	0.103777	0.0153661	0.321263	0.0158568	0	0	0.158607	0	0	0	0.132059	0	0.316631	0.0697229	0	0.0876141	0	0	0
ENSG00000102172	SMS	0.381306	0.438205	0.412906	0.446646	0.392466	0.257125	0.382373	0.459175	0.439609	0.446952	0.435471	0.427869	0.322799	0.443595	0.441769	0.348828	0.236231	0.375959	0.428545	0.367792	0.434194	0.542317
ENSG00000154975	CA10	0.381196	0.147358	0.349544	0.492673	0	0.0253364	0.400475	0.598617	0.631324	0.663194	0.690165	0.564506	0.497461	0.294139	0.507849	0.611394	0.449161	0.443848	0.528471	0	0.091749	0
ENSG00000253710	ALG11	0.380904	0.266953	0.286684	0.635344	0	0.477436	0.360588	0.177147	0.13427	0.192627	0.343144	0.201836	0.0493984	0.222947	0.350011	0.099605	0	0.0112013	0.238026	0.214131	0.289263	0.0904681
ENSG00000113205	PCDHB3	0.380745	0	0.428202	0.0776382	0.0109827	0	0	0.590735	0	0.221103	0	0	0.343092	0.658612	0	0	0	0	0	0.221403	0.551637	0.19009
ENSG00000108395	TRIM37	0.380568	0.400752	0.4365	0.404523	0.428844	0.352518	0.296169	0.48613	0.406715	0.475442	0.424483	0.363208	0.525009	0.495516	0.421063	0.433727	0.336277	0.35852	0.446286	0.40449	0.416742	0.320341
ENSG00000171735	CAMTA1	0.380521	0.461526	0.43859	0.398776	0.358508	0.185976	0.329368	0.433861	0.436617	0.436532	0.430878	0.401043	0.427907	0.439372	0.439451	0.287509	0.10215	0.0597624	0.396371	0.230043	0.425624	0.347953
ENSG00000115419	GLS	0.380428	0.34057	0.338833	0.427732	0.608236	0.00336417	0.388058	0.357911	0.308086	0.291387	0.279675	0.154978	0.385791	0.371875	0.342498	0.441924	0.358776	0.532117	0.567685	0.520124	0.299999	0.341743
ENSG00000147894	C9orf72	0.379985	0.391548	0.36836	0.47471	0.167361	0	0.390588	0.270183	0.0193746	0.0343726	0.139404	0.150204	0.0477273	0.366592	0.35737	0.00338826	0	0.234932	0.150273	0.0347943	0.393191	0.292716
ENSG00000124459	ZNF45	0.379925	0.0451222	0	0	0	0	0	0	0.000671398	0	0	0	0	0	0.132578	0	0	0	0	0.0329556	0	0.376662
ENSG00000163703	CRELD1	0.37949	0.204372	0.307954	0.253996	0.208898	0.0212363	0.144167	0.320891	0.0337617	0.0662277	0.187946	0.109803	0	0.314228	0.209768	0.301379	0.0979536	0.00134298	0.167226	0.377631	0.2587	0.168937
ENSG00000101132	PFDN4	0.379444	0.350068	0.228461	0.0116256	0.413221	0	0.323001	0.17977	0.283096	0.0250775	0.253349	0.274951	0.0351604	0.224682	0.385916	0.0478592	0	0.167122	0.178147	0	0.335596	0.432307
ENSG00000196632	WNK3	0.379235	0.36395	0.639353	0.566758	0.0945864	0.0941573	0.601765	0.477205	0.455507	0.363719	0.505992	0.394068	0.47452	0.451421	0.621171	0.348972	0.380527	0.298898	0.328461	0.26055	0.510227	0.463825
ENSG00000058056	USP13	0.379101	0.25699	0.45274	0.315698	0.338204	0	0.424557	0.295005	0.31744	0.433153	0.42503	0.21279	0.377361	0.378062	0.326645	0.418392	0.385097	0.370917	0	0.159513	0.392711	0.530618
ENSG00000029364	SLC39A9	0.379038	0.277509	0.438759	0.361359	0.354075	0	0.310126	0.110472	0.0888469	0	0.284556	0	0.078008	0.270329	0.346974	0.0907603	0	0.00844402	0.206547	0.319965	0.336426	0.0867163
ENSG00000172410	INSL5	0.378744	0	0	0.667091	0	0	0.46258	0.470285	0.225915	0.464313	0	0	0.812601	0.35216	0.505777	0.338297	0	0	0.0189873	0.164294	0.190674	0.14532
ENSG00000115977	AAK1	0.378704	0.3937	0.415097	0.339771	0.425028	0.144449	0.239661	0.432811	0.353175	0.383832	0.377047	0.297356	0.355836	0.431792	0.33873	0.422559	0.381527	0.432081	0.579571	0.491867	0.419355	0.439758
ENSG00000167654	ATCAY	0.378214	0.422079	0.513719	0.392759	0.39889	0.122582	0.387116	0.489458	0.405746	0.435362	0.423221	0.36815	0.501425	0.456454	0.44815	0.421323	0.215279	0.366192	0.405556	0.609232	0.453004	0.447718
ENSG00000105143	SLC1A6	0.377919	0.587053	0.406732	0.489088	0.286821	0	0.216696	0.563568	0.632791	0.409834	0.661688	0.373408	0.395725	0.442085	0.738448	0	0.0269015	0.0615801	0.0329703	0.11293	0.415379	0.314791
ENSG00000013561	RNF14	0.377848	0.414034	0.42607	0.335473	0.371788	0.126682	0.332787	0.363848	0.415099	0.390004	0.371845	0.294925	0.190307	0.411456	0.436848	0.375975	0.285796	0.372867	0.406102	0.340321	0.431167	0.406137
ENSG00000136928	GABBR2	0.377632	0.281909	0.359922	0.310163	0.548705	0.312747	0	0.380997	0.205174	0.270922	0.285309	0.0540696	0	0.39817	0.40223	0.607252	0.325818	0.551206	0.606345	0.584663	0.18537	0.361427
ENSG00000115840	SLC25A12	0.377533	0.369615	0.560978	0.33957	0.382157	0.136259	0.358749	0.519907	0.318971	0.327056	0.361712	0.28061	0.416643	0.609228	0.426338	0.274788	0.104162	0.267097	0.380583	0.371145	0.463334	0.495147
ENSG00000173166	RAPH1	0.377456	0.230224	0.397496	0.395318	0.199421	0.394987	0.407113	0.146225	0.145478	0.232149	0.270319	0.181948	0.106217	0.279579	0.366306	0.356896	0.27141	0.436204	0.410023	0.36204	0.359647	0.447933
ENSG00000124422	USP22	0.377385	0.363972	0.341117	0.377549	0.298708	0.165896	0.387094	0.32372	0.375338	0.36495	0.36021	0.250631	0.229058	0.370412	0.401573	0.388099	0.0751322	0.307052	0.412223	0.290519	0.359332	0.362458
ENSG00000178385	PLEKHM3	0.376962	0.0439988	0.231465	0.170113	0.0739317	0	0	0.157803	0.0254652	0	0	0	0	0.269863	0.150999	0.344276	0.0635608	0.286305	0.320917	0.249671	0.316105	0.341086
ENSG00000063438	AHRR	0.376961	0	0	0	0	0	0	0	0	0	0	0	0	0	0	0	0	0	0	0.31875	0	0.766219
ENSG00000170027	YWHAG	0.376866	0.428218	0.410313	0.393488	0.377878	0.235282	0.333815	0.402486	0.42557	0.426535	0.418797	0.340778	0.371414	0.417031	0.424901	0.406952	0.316302	0.375514	0.42686	0.373213	0.406001	0.398427
ENSG00000163596	ICA1L	0.376834	0.397191	0.317147	0.302101	0.295801	0.211946	0.302684	0.228785	0.43275	0.515702	0.409571	0.504486	0.119326	0.308201	0.380438	0.422972	0.280417	0.499984	0.399281	0.420091	0.394359	0.295445
ENSG00000148356	LRSAM1	0.37617	0.270041	0.609042	0.413721	0.404264	0.279782	0.5701	0.433838	0.160671	0.21612	0.299102	0.0527985	0.21963	0.441287	0.369593	0.0817342	0	0.19297	0.248466	0.29164	0.395095	0.408849
ENSG00000157851	DPYSL5	0.375922	0.29438	0.0231853	0.412656	0.200162	0	0.448984	0.0601848	0.328773	0	0.179167	0.260131	0	0.032851	0.277588	0	0.24073	0.359192	0.0953447	0.148612	0.313398	0.65599
ENSG00000173611	SCAI	0.375868	0.225835	0.271511	0.289977	0.310263	0.39717	0.40153	0.270412	0.266373	0.0440066	0.27308	0.259011	0.25008	0.273891	0.164446	0.330367	0.19049	0.388112	0.469469	0.642827	0.312585	0.831218
ENSG00000143153	ATP1B1	0.375569	0.433898	0.421467	0.35976	0.373809	0.245795	0.25201	0.407437	0.389337	0.412607	0.378875	0.336431	0.389139	0.426472	0.411684	0.41052	0.298274	0.288061	0.39684	0.422394	0.418752	0.382461
ENSG00000116793	PHTF1	0.375138	0.18932	0.193075	0	0	0.18647	0.123688	0.32941	0.103616	0.160462	0	0.0898351	0.0962567	0.313104	0.197002	0.358734	0	0.132369	0.357195	0.374475	0.284364	0.364034
ENSG00000129682	FGF13	0.374984	0	0.210447	0.428419	0	0.39963	0.622252	0.200273	0.393332	0	0.286102	0.316802	0	0	0.14531	0.458972	0.318331	0.0413223	0.479402	0.0855083	0	0.478244
ENSG00000156642	NPTN	0.374984	0.370388	0.462782	0.433743	0.255915	0.237473	0.261305	0.402666	0.286873	0.384352	0.269473	0.195784	0.38368	0.396242	0.233109	0.395303	0.281556	0.120971	0.36653	0.447999	0.373993	0
ENSG00000050748	MAPK9	0.374867	0.413854	0.55028	0.450765	0.48826	0.390363	0.423372	0.560021	0.386335	0.426311	0.448912	0.400504	0.396513	0.489361	0.499775	0.401572	0.123362	0.285938	0.291988	0.370963	0.436154	0.392675
ENSG00000123684	LPGAT1	0.374864	0.401257	0.560294	0.368074	0.290133	0.234592	0.211058	0.50167	0.176533	0.294519	0.371668	0.26372	0.341062	0.591077	0.46431	0.433042	0.30228	0.38322	0.362965	0.522714	0.471113	0.402656
ENSG00000120256	LRP11	0.374823	0.300081	0.324275	0.26467	0.427884	0.318563	0.338632	0.373879	0.106225	0.368984	0.207226	0.0707064	0.085762	0.407224	0.270955	0.441497	0.280771	0.403933	0.45987	0.455645	0.361272	0.45181
ENSG00000204851	PNMA8B	0.374742	0.46462	0.492053	0.450542	0.392073	0.195332	0.375464	0.450705	0.562674	0.452564	0.498814	0.44166	0.419067	0.450646	0.486267	0.414118	0.325262	0.164074	0.413706	0.324983	0.463423	0.436142
ENSG00000103056	SMPD3	0.374177	0	0	0	0	0.0994936	0	0	0.0943061	0.0177188	0	0	0	0	0	0.420291	0.417651	0.35062	0.589923	0.392429	0.243612	0.466395
ENSG00000159753	CARMIL2	0.373965	0.321908	0.333523	0.271411	0.587553	0	0.348699	0.544281	0.494871	0.502075	0.582246	0.402125	0	0.43738	0.430062	0.361801	0.0100598	0.362047	0.599501	0.16249	0.280523	0.290642
ENSG00000171724	VAT1L	0.373769	0.510051	0.482004	0.616357	0.486279	0	0.485449	0.473568	0.507538	0.262703	0.489232	0.471599	0.467682	0.47547	0.490741	0.309215	0	0.137916	0	0.471572	0.607351	0.17252
ENSG00000137338	PGBD1	0.373697	0.183765	0.279632	0.0585086	0.0853565	0	0.452423	0.0704559	0.0552206	0.0368481	0.35395	0	0.00935886	0.144197	0.0697115	0.0194688	0.357985	0.109037	0.197832	0	0.242682	0.173496
ENSG00000168843	FSTL5	0.373669	0.465857	0.470991	0.630843	0	0.39112	0.287701	0.462461	0.4388	0	0.476579	0.497616	0	0.40734	0.441477	0.417133	0.412633	0.269766	0.402885	0.415057	0.472701	0.618516
ENSG00000106571	GLI3	0.373592	0	0	0	0	0	0	0	0	0	0	0.0311448	0	0	0	0	0	0	0	0	0	0
ENSG00000120693	SMAD9	0.373159	0.366329	0.5807	0.457192	0	0.0934831	0.253282	0.34764	0.187894	0.380949	0.197361	0	0.360185	0.705866	0.275021	0	0	0	0	0	0.390135	0.457871
ENSG00000267699	AC091551	0.372709	0.617266	0.570849	0.475799	0.364393	0.0295506	0.616873	0.525406	0.403669	0.378269	0.435251	0.379943	0.0536096	0.439411	0.544532	0	0	0	0.189432	0.0561594	0.46717	0.386554
ENSG00000141161	UNC45B	0.372624	0	0	0.089613	0	0	0	0	0	0	0	0	0	0	0	0	0	0	0	0	0	0
ENSG00000141562	NARF	0.372493	0.111491	0.15811	0	0	0	0	0.0321538	0.249662	0.417062	0.12704	0.00473509	0.040107	0.272505	0.252371	0.192063	0.00454127	0.00196281	0.336829	0.215481	0.165619	0
ENSG00000071073	MGAT4A	0.372453	0.390644	0.365954	0.261328	0	0.0193258	0.333049	0.404776	0.366467	0.322828	0.413016	0.0945442	0.234015	0.368328	0.330886	0.397224	0.261642	0.133464	0.403057	0.180547	0.281919	0
ENSG00000222040	NA	0.372368	0	0	0	0	0	0	0	0	0	0	0	0	0	0	0	0	0	0	0	0	0
ENSG00000165972	CCDC38	0.372012	0	0	0.248911	0.0880539	0	0.323299	0.417918	0.473344	0.150057	0	0	0	0	0.101729	0.121474	0	0	0	0	0.316405	0
ENSG00000183309	ZNF623	0.371968	0.113774	0	0	0.143176	0	0.0875371	0	0	0	0	0	0	0.0250594	0	0	0	0	0.0407345	0	0	0.0309609
ENSG00000196440	ARMCX4	0.37189	0.428246	0.342755	0.67302	0.228401	0.351845	0.578349	0.359557	0.33218	0.0211077	0.228444	0.380414	0.0425134	0.296455	0.421501	0.213729	0.335135	0.313627	0.286642	0.300262	0.385257	0.268536
ENSG00000171150	SOCS5	0.371788	0.542346	0.62419	0.361837	0.422686	0	0.209048	0.551071	0.365181	0.424514	0.420729	0.354178	0.571105	0.580914	0.54458	0.223782	0.068579	0.321697	0.352	0.244968	0.458798	0.601093
ENSG00000242732	RTL5	0.371669	0.424413	0.589347	0.650875	0.34071	0	0.561432	0.390219	0.640018	0.358188	0.652627	0.448495	0.156417	0.382703	0.688537	0	0	0	0	0	0.607185	0.13037
ENSG00000144218	AFF3	0.371533	0.282486	0.353871	0.680365	0.378012	0.0314607	0.358001	0.286255	0.354366	0.40377	0.387686	0.359217	0.104164	0.370081	0.258771	0.310568	0	0.416465	0.399725	0.334996	0.367423	0.397196
ENSG00000173264	GPR137	0.371473	0.0608204	0.372857	0.342539	0.454048	0	0.185938	0.382006	0.0530884	0.0629841	0.343296	0	0	0.376294	0.317777	0.261812	0	0.14191	0.328677	0.362219	0.251144	0.241573
ENSG00000186310	NAP1L3	0.371044	0.559106	0.52462	0.671953	0.196785	0.299085	0.527519	0.351126	0.347978	0.182899	0.310115	0.0479908	0.207984	0.446053	0.396569	0	0	0	0.0957935	0.0565658	0.429365	0.33525
ENSG00000112175	BMP5	0.371021	0.16718	0	0	0	0	0	0	0	0.408248	0	0.347484	0	0.0092437	0	0	0	0	0	0	0	0
ENSG00000157837	SPPL3	0.370926	0.332846	0.45421	0.260153	0.188994	0	0.320387	0.284984	0.226352	0.21834	0.249955	0.20383	0.167088	0.360985	0.344102	0.345009	0	0.281717	0.314742	0.394608	0.40398	0.323507
ENSG00000113851	CRBN	0.370925	0.135604	0.181013	0.267636	0.0832704	0	0.312967	0.341727	0.288709	0.196635	0.255285	0.015869	0.0528743	0.279591	0.204049	0.242736	0.0132214	0.0483201	0.0278845	0.215266	0.298114	0.140354
ENSG00000152102	FAM168B	0.37088	0.386512	0.428541	0.284815	0.351816	0.123738	0.146272	0.40057	0.264466	0.351039	0.378398	0.325358	0.356511	0.462144	0.382266	0.359334	0.050184	0.297954	0.369915	0.320465	0.397535	0.251205
ENSG00000079841	RIMS1	0.370768	0.35716	0.312717	0.611745	0.245436	0.55071	0.664201	0.298695	0.179317	0.32874	0.425279	0.18328	0	0.305937	0.372861	0.550022	0.393802	0.405276	0.586234	0.319858	0.226007	0.709742
ENSG00000115839	RAB3GAP1	0.370533	0.364263	0.456731	0.294713	0.332178	0.303034	0.369686	0.366704	0.325641	0.353238	0.388553	0.190226	0.12266	0.422766	0.381822	0.347462	0.367	0.375526	0.339996	0.403794	0.349847	0.326381
ENSG00000188158	NHS	0.370285	0.504215	0.471103	0.601639	0	0.319539	0.406849	0.499136	0.435895	0.428985	0.448248	0.442973	0.448629	0.422406	0.386862	0	0	0	0	0	0.564152	0.72583
ENSG00000065000	AP3D1	0.37021	0.182668	0.204787	0.339948	0.317157	0.106979	0.518964	0.279891	0.0300211	0.260559	0.238683	0.0637958	0.103676	0.280136	0.31016	0.361507	0.300868	0.36979	0.320552	0.348981	0.335405	0.415196
ENSG00000171703	TCEA2	0.370179	0.319148	0.426371	0.320672	0.394202	0	0.238074	0.52992	0.388539	0.346557	0.371885	0.420495	0.223807	0.577598	0.41688	0.332635	0.135751	0.382977	0.365917	0.381933	0.241267	0.0849159
ENSG00000180287	PLD5	0.37	0.343468	0.376184	0.671637	0	0.352048	0.303925	0.377213	0.409559	0.326462	0.192585	0.326061	0	0.598797	0.370963	0.126821	0	0	0	0	0.395464	0
ENSG00000101210	EEF1A2	0.369884	0.396931	0.435784	0.447831	0.590811	0.404912	0.439046	0.454503	0.382684	0.435829	0.40162	0.357815	0.190138	0.501119	0.466194	0.338095	0.115256	0.37118	0.395823	0.41258	0.460229	0.451212
ENSG00000102024	PLS3	0.369077	0	0.0444113	0.195464	0.166201	0.309427	0.305929	0.142306	0	0	0.0663284	0.338232	0	0	0	0.0231018	0.287103	0.116189	0.281275	0.140206	0	0.311231
ENSG00000182749	PAQR7	0.368948	0	0.00745172	0.168479	0.0536817	0	0.197745	0.0968844	0	0	0	0.0374968	0	0.157489	0	0	0	0	0	0	0	0
ENSG00000183723	CMTM4	0.368483	0.272316	0.390161	0.544188	0.171298	0	0.252275	0.36628	0.407292	0.0953453	0.490224	0.160282	0.248734	0.384687	0.383627	0.461605	0.390194	0.492051	0.264919	0.594033	0.3515	0.139676
ENSG00000137414	FAM8A1	0.368396	0.346816	0.400366	0.687539	0.0495674	0.357093	0.659966	0.36183	0.388414	0.172112	0.380953	0.300144	0.0854278	0.394844	0.401125	0.332842	0.30552	0.279403	0.0793432	0.383483	0.362964	0.19978
ENSG00000159202	UBE2Z	0.368189	0.332839	0.414993	0.335693	0.399715	0.232584	0.405883	0.333858	0.0944274	0.191664	0.309469	0.39845	0.0808824	0.401588	0.423114	0.281806	0.237195	0.386462	0.344294	0.310693	0.398257	0.407405
ENSG00000102452	NALCN	0.368027	0.454081	0.427926	0.636844	0.429255	0.452987	0.406397	0.399402	0.359345	0.121006	0.354941	0.221161	0.258203	0.41888	0.4058	0.379947	0.351514	0.272954	0.347444	0.403795	0.425039	0.407557
ENSG00000111913	RIPOR2	0.368002	0	0.141848	0	0	0	0	0	0.244694	0.00939194	0.00187899	0	0	0	0.12456	0.33119	0.46268	0.570704	0.390386	0.0342648	0.314294	0.579393
ENSG00000166200	COPS2	0.367987	0.240789	0.369762	0.277012	0.247055	0.215525	0.366387	0.334631	0.230205	0.194416	0.378165	0.125544	0.137299	0.336813	0.208368	0.168574	0.0134514	0.131415	0.23787	0.0254603	0.321663	0.207067
ENSG00000198216	CACNA1E	0.367861	0.126126	0.117917	0.0319461	0.424514	0.287687	0.189927	0.229748	0.416625	0.375651	0.290102	0	0.51532	0.0185462	0.155673	0.765558	0.488101	0.598327	0.649267	0.629673	0.143243	0
ENSG00000089818	NECAP1	0.367857	0.429229	0.448147	0.423725	0.428149	0.120795	0.402435	0.414326	0.430362	0.411858	0.449836	0.415985	0.290965	0.452731	0.461886	0.37437	0.207085	0.400157	0.416105	0.362268	0.448137	0.423538
ENSG00000106683	LIMK1	0.367674	0.42547	0.776275	0.584083	0.708785	0.448927	0.400174	0.653795	0.15108	0.275759	0.491536	0.325144	0.444468	0.743848	0.643743	0	0	0	0	0.339725	0.574703	0.43762
ENSG00000107758	PPP3CB	0.367611	0.358178	0.335329	0.480002	0.342897	0.0990328	0.36606	0.364451	0.334709	0.413853	0.359582	0.293784	0.390717	0.411714	0.365662	0.532326	0.32899	0.437586	0.551402	0.416882	0.359171	0.364665
ENSG00000101350	KIF3B	0.367303	0.066175	0.427734	0.169994	0.357082	0.212753	0.0619916	0.133987	0.0832469	0.234135	0	0	0.242201	0.357686	0.162178	0.465208	0.105498	0.315764	0.482438	0.545261	0.360363	0.39365
ENSG00000140995	DEF8	0.367118	0.0972252	0.366376	0.185769	0.42942	0.10049	0.229313	0.338611	0	0	0.0793569	0	0	0.346439	0.252875	0	0	0.0750664	0.122782	0.0119747	0.298334	0.322436
ENSG00000157087	ATP2B2	0.366402	0.417455	0.580315	0.35544	0.489635	0.237149	0.165827	0.539195	0.156341	0.442002	0.289735	0.242993	0.535208	0.617186	0.424345	0.531187	0.273688	0.237062	0.444729	0.638191	0.432135	0.380714
ENSG00000196821	C6orf106	0.366402	0.107345	0.233778	0.184328	0.339781	0.213532	0.322332	0.204871	0.00868022	0.139602	0.00272454	0	0.161297	0.339566	0.20312	0.28205	0	0.183107	0.376582	0.33185	0.1999	0.296003
ENSG00000152954	NRSN1	0.366112	0.446919	0.398878	0.383777	0.426715	0.278613	0.253059	0.403906	0.507001	0.46082	0.428915	0.421493	0.361395	0.40412	0.444078	0.240246	0.151127	0.370853	0.368289	0.420552	0.409442	0
ENSG00000137267	TUBB2A	0.365626	0.353114	0.363315	0	0.338603	0	0.0895228	0.249385	0.302758	0.349221	0.262961	0.192475	0	0.277885	0.302808	0.369696	0.316842	0.265707	0.385218	0.281327	0.377167	0.261871
[truncated: 14,110 more rows]

## Sheet: 7 - MNS BMI-prioritized 
Annotation	Significant GWAS traits (FWER<0.05)	Probable location	Region	Description
[truncated: 22 more rows]

## Sheet: 8 - S-LDSC Modules
Module ID	Module color ID	No. genes	P-value	Module cell-type	Module cell-type description
[truncated: 563 more rows]

[truncated: 8 more sheets: 9 - Module M1, 10 - MAGMA MNS, 11 - MNS S-LDSC cond., 12 - HYP metadata, 13 - S-LDSC HYP, 14 - ESmu HYP BMI cell-types, 15 - Rare var obesity geneset, 16 - MNS rare var obesity]
