# Supplementary material for: Genetic mapping of etiologic brain cell types for obesity
Source: eLife. 2020 Sep 21;9:e55851. doi: 10.7554/eLife.55851 (PMC7505664; doi:10.7554/eLife.55851)
Supplement: Figure 5—source data 5. [file elife-55851-fig5-data5.xlsx]

## Sheet: Sheet 1
Gene symbol	Ensemble gene ID	Campbell (lvl2)	Mouse Nervous System	Tabula Muris
Bdnf	ENSG00000176697	13	86	15
Cep19	ENSG00000174007	25	140	NA
Ksr2	ENSG00000171435	28	143	20
Lep	ENSG00000174697	NA	1	NA
Lepr	ENSG00000116678	10	46	19
Mc4r	ENSG00000166603	11	61	16
Ntrk2	ENSG00000148053	9	118	16
Pcsk1	ENSG00000175426	19	106	18
Pomc	ENSG00000115138	3	96	24
Sh2b1	ENSG00000178188	8	85	22
Sim1	ENSG00000112246	11	13	17
Wnt10b	ENSG00000169884	NA	26	19
Zbtb7b	ENSG00000160685	NA	NA	NA
Ache	ENSG00000087085	28	162	17
Rapgef3	ENSG00000079337	NA	40	22
Prkag1	ENSG00000181929	7	83	35
Rab21	ENSG00000080371	10	103	29
Hip1r	ENSG00000130787	10	59	41
Zfhx3	ENSG00000140836	24	102	24
Gipr	ENSG00000010310	12	51	16
Entpd6	ENSG00000197586	22	112	35
Zfr2	ENSG00000105278	17	140	27
Znf169	ENSG00000175787	NA	50	31
