# Supplementary material for: Genetic mapping of etiologic brain cell types for obesity
Source: eLife. 2020 Sep 21;9:e55851. doi: 10.7554/eLife.55851 (PMC7505664; doi:10.7554/eLife.55851)
Supplement: Figure 5—source data 6. [file elife-55851-fig5-data6.xlsx]

## Sheet: Sheet 1
Study	Cell population	Statistic	P-value	Conf. low	method	alternative
campbell2017_lvl1	a01.Oligodend3	c(W = 101577.5)	0.694854	-1.4615e-06	Wilcoxon rank sum test with continuity correction	greater
campbell2017_lvl1	a02.Oligodend2	c(W = 94527)	0.885321	-7.18454e-05	Wilcoxon rank sum test with continuity correction	greater
campbell2017_lvl1	a03.EndothelialCells	c(W = 100624)	0.700901	-1.77639e-05	Wilcoxon rank sum test with continuity correction	greater
campbell2017_lvl1	a04.MuralCells	c(W = 90025)	0.939173	-1.0083e-05	Wilcoxon rank sum test with continuity correction	greater
campbell2017_lvl1	a05.Oligodend1	c(W = 91347)	0.921999	-8.09912e-05	Wilcoxon rank sum test with continuity correction	greater
campbell2017_lvl1	a06.NG2-OPC	c(W = 94824.5)	0.854428	-2.27574e-05	Wilcoxon rank sum test with continuity correction	greater
campbell2017_lvl1	a07.PVMMicro	c(W = 93288)	0.902598	-2.19767e-05	Wilcoxon rank sum test with continuity correction	greater
campbell2017_lvl1	a08.Fibroblast	c(W = 99954.5)	0.741662	-5.8906e-06	Wilcoxon rank sum test with continuity correction	greater
campbell2017_lvl1	a09.Ependymocytes	c(W = 87255)	0.937557	-2.56815e-05	Wilcoxon rank sum test with continuity correction	greater
campbell2017_lvl1	a10.Astrocyte	c(W = 102473)	0.661449	-7.19009e-06	Wilcoxon rank sum test with continuity correction	greater
campbell2017_lvl1	a11.Tanycyte1	c(W = 93095)	0.865961	-3.01117e-05	Wilcoxon rank sum test with continuity correction	greater
campbell2017_lvl1	a12.Tanycyte2	c(W = 89526)	0.92253	-4.84949e-05	Wilcoxon rank sum test with continuity correction	greater
campbell2017_lvl1	a13.Neurons1	c(W = 119625)	0.104308	-3.22426e-05	Wilcoxon rank sum test with continuity correction	greater
campbell2017_lvl1	a14.Neurons2	c(W = 128318)	0.0184991	4.14007e-05	Wilcoxon rank sum test with continuity correction	greater
campbell2017_lvl1	a15.Neurons3	c(W = 139394)	0.00310136	6.24194e-05	Wilcoxon rank sum test with continuity correction	greater
campbell2017_lvl1	a16.Neurons4	c(W = 112420.5)	0.311469	-7.06628e-05	Wilcoxon rank sum test with continuity correction	greater
campbell2017_lvl1	a17.Neurons5	c(W = 117272)	0.183971	-3.20294e-05	Wilcoxon rank sum test with continuity correction	greater
campbell2017_lvl1	a18.Neurons6	c(W = 158587.5)	0.000110291	0.0803005	Wilcoxon rank sum test with continuity correction	greater
campbell2017_lvl1	a19.ParsTuber1	c(W = 85723.5)	0.940241	-6.79023e-05	Wilcoxon rank sum test with continuity correction	greater
campbell2017_lvl1	a20.ParsTuber2	c(W = 121908.5)	0.0694913	-5.22957e-05	Wilcoxon rank sum test with continuity correction	greater
campbell2017_lvl2	n01.Hdc	c(W = 114125)	0.438001	-6.91061e-05	Wilcoxon rank sum test with continuity correction	greater
campbell2017_lvl2	n02.Gm8773-Tac1	c(W = 118472)	0.302612	-4.11118e-05	Wilcoxon rank sum test with continuity correction	greater
campbell2017_lvl2	n03	c(W = 109352)	0.614618	-5.19183e-05	Wilcoxon rank sum test with continuity correction	greater
campbell2017_lvl2	n04.Sst-Nts	c(W = 123099)	0.19514	-3.6918e-06	Wilcoxon rank sum test with continuity correction	greater
campbell2017_lvl2	n05.Nfix-Htr2c	c(W = 121998.5)	0.188497	-4.07218e-05	Wilcoxon rank sum test with continuity correction	greater
campbell2017_lvl2	n06.Oxt	c(W = 120587)	0.207488	-5.37904e-06	Wilcoxon rank sum test with continuity correction	greater
campbell2017_lvl2	n07	c(W = 119056)	0.27064	-4.82574e-05	Wilcoxon rank sum test with continuity correction	greater
campbell2017_lvl2	n08	c(W = 116510.5)	0.35951	-3.52101e-05	Wilcoxon rank sum test with continuity correction	greater
campbell2017_lvl2	n09.Th-Slc6a3	c(W = 122925.5)	0.151718	-2.87724e-06	Wilcoxon rank sum test with continuity correction	greater
campbell2017_lvl2	n10.Ghrh	c(W = 106944)	0.671638	-6.10202e-05	Wilcoxon rank sum test with continuity correction	greater
campbell2017_lvl2	n11.Th-Cxcl12	c(W = 133752)	0.0366173	4.8346e-05	Wilcoxon rank sum test with continuity correction	greater
campbell2017_lvl2	n12.Agrp-Sst	c(W = 129622)	0.0928371	-2.23028e-05	Wilcoxon rank sum test with continuity correction	greater
campbell2017_lvl2	n13.Agrp-Gm8773	c(W = 126993.5)	0.145486	-3.10629e-05	Wilcoxon rank sum test with continuity correction	greater
campbell2017_lvl2	n14.Pomc-Ttr	c(W = 137507)	0.021376	2.30183e-05	Wilcoxon rank sum test with continuity correction	greater
campbell2017_lvl2	n15.Pomc-Anxa2	c(W = 139703)	0.0167609	3.72212e-05	Wilcoxon rank sum test with continuity correction	greater
campbell2017_lvl2	n16.Rgs16-Vip	c(W = 105051)	0.762674	-5.86105e-05	Wilcoxon rank sum test with continuity correction	greater
campbell2017_lvl2	n17.Rgs16-Dlx1	c(W = 109037)	0.641924	-3.49584e-05	Wilcoxon rank sum test with continuity correction	greater
campbell2017_lvl2	n18.Rgs16-Slc17a6	c(W = 107175)	0.701781	-1.80154e-05	Wilcoxon rank sum test with continuity correction	greater
campbell2017_lvl2	n19.Gpr50	c(W = 126319)	0.0745025	-5.21258e-05	Wilcoxon rank sum test with continuity correction	greater
campbell2017_lvl2	n20.Kiss1-Tac2	c(W = 137229)	0.0200191	1.27337e-05	Wilcoxon rank sum test with continuity correction	greater
campbell2017_lvl2	n21.Pomc-Glipr1	c(W = 160097)	8.37741e-05	0.0141727	Wilcoxon rank sum test with continuity correction	greater
campbell2017_lvl2	n22.Tmem215	c(W = 142533.5)	0.00655081	4.68954e-05	Wilcoxon rank sum test with continuity correction	greater
campbell2017_lvl2	n23.Sst-Unc13c	c(W = 104939)	0.739355	-3.47088e-05	Wilcoxon rank sum test with continuity correction	greater
campbell2017_lvl2	n24.Sst-Pthlh	c(W = 111552.5)	0.528215	-7.51081e-06	Wilcoxon rank sum test with continuity correction	greater
campbell2017_lvl2	n25.Th-Lef1	c(W = 101255)	0.852681	-5.4108e-05	Wilcoxon rank sum test with continuity correction	greater
campbell2017_lvl2	n26.Htr3b	c(W = 112324.5)	0.502942	-5.16151e-05	Wilcoxon rank sum test with continuity correction	greater
campbell2017_lvl2	n27	c(W = 120666.5)	0.229911	-2.9343e-05	Wilcoxon rank sum test with continuity correction	greater
campbell2017_lvl2	n28.Qrfp	c(W = 140400)	0.00123919	5.83804e-06	Wilcoxon rank sum test with continuity correction	greater
campbell2017_lvl2	n29.Nr5a1-Adcyap1	c(W = 138263)	0.0210285	4.40581e-05	Wilcoxon rank sum test with continuity correction	greater
campbell2017_lvl2	n30.Nr5a1-Nfib	c(W = 134763)	0.0164029	4.82061e-05	Wilcoxon rank sum test with continuity correction	greater
campbell2017_lvl2	n31.Fam19a2	c(W = 118635.5)	0.293398	-6.71013e-06	Wilcoxon rank sum test with continuity correction	greater
campbell2017_lvl2	n32.Slc17a6-Trhr	c(W = 150965)	0.00122579	2.56428e-05	Wilcoxon rank sum test with continuity correction	greater
campbell2017_lvl2	n33.unassigned(1)	c(W = 145917)	0.000551487	5.90112e-05	Wilcoxon rank sum test with continuity correction	greater
campbell2017_lvl2	n34.unassigned(2)	c(W = 134286)	0.029752	1.1982e-05	Wilcoxon rank sum test with continuity correction	greater
campbell2017_lvl2	s01.Ependymocy1	c(W = 86868)	0.976024	-1.75571e-05	Wilcoxon rank sum test with continuity correction	greater
campbell2017_lvl2	s02.Ependymocy2	c(W = 88839)	0.969948	-3.96106e-05	Wilcoxon rank sum test with continuity correction	greater
campbell2017_lvl2	s03.Oligodendro1	c(W = 116572.5)	0.324452	-1.51593e-05	Wilcoxon rank sum test with continuity correction	greater
campbell2017_lvl2	s04.Oligodendro2	c(W = 107854)	0.68582	-5.38081e-05	Wilcoxon rank sum test with continuity correction	greater
campbell2017_lvl2	s05.Oligodendro3	c(W = 108768)	0.649122	-5.83815e-05	Wilcoxon rank sum test with continuity correction	greater
campbell2017_lvl2	s06.Oligodendro4	c(W = 112438)	0.499257	-5.10423e-05	Wilcoxon rank sum test with continuity correction	greater
campbell2017_lvl2	s07.Oligodendro5	c(W = 101945)	0.862631	-1.6292e-05	Wilcoxon rank sum test with continuity correction	greater
campbell2017_lvl2	s08.Pars_Tuber1A	c(W = 108273)	0.621884	-5.8754e-05	Wilcoxon rank sum test with continuity correction	greater
campbell2017_lvl2	s09.Pars_Tuber1B	c(W = 111650)	0.536077	-2.97147e-06	Wilcoxon rank sum test with continuity correction	greater
campbell2017_lvl2	s10.Pars_Tuber1C	c(W = 98689)	0.860336	-3.65146e-05	Wilcoxon rank sum test with continuity correction	greater
campbell2017_lvl2	s11.Endothelial	c(W = 99759)	0.869046	-3.88509e-05	Wilcoxon rank sum test with continuity correction	greater
campbell2017_lvl2	s12.Mural_Cells1	c(W = 101192.5)	0.879086	-1.08235e-05	Wilcoxon rank sum test with continuity correction	greater
campbell2017_lvl2	s13.Mural_Cells2	c(W = 96556.5)	0.935907	-4.43229e-05	Wilcoxon rank sum test with continuity correction	greater
campbell2017_lvl2	s14.PVMs	c(W = 104619)	0.814952	-4.44873e-05	Wilcoxon rank sum test with continuity correction	greater
campbell2017_lvl2	s15.Microglia	c(W = 97893)	0.917814	-4.85545e-05	Wilcoxon rank sum test with continuity correction	greater
campbell2017_lvl2	s16.Fibroblasts1	c(W = 101986)	0.869147	-4.23895e-05	Wilcoxon rank sum test with continuity correction	greater
campbell2017_lvl2	s17.Fibroblasts2	c(W = 111292)	0.551078	-2.19851e-05	Wilcoxon rank sum test with continuity correction	greater
campbell2017_lvl2	s18.Fibroblasts3	c(W = 94365)	0.967559	0	Wilcoxon rank sum test with continuity correction	greater
campbell2017_lvl2	s19.Parstuber2A	c(W = 116033)	0.367353	-3.19084e-05	Wilcoxon rank sum test with continuity correction	greater
campbell2017_lvl2	s20.Parstuber2B	c(W = 123725)	0.0459612	9.71733e-06	Wilcoxon rank sum test with continuity correction	greater
campbell2017_lvl2	s27.Oligodendro6	c(W = 97401.5)	0.920756	-7.46226e-05	Wilcoxon rank sum test with continuity correction	greater
campbell2017_lvl2	s28.NG2_OPC1	c(W = 104022)	0.828514	-2.27114e-05	Wilcoxon rank sum test with continuity correction	greater
campbell2017_lvl2	s29.NG2_OPC2	c(W = 100422)	0.858908	-5.13027e-05	Wilcoxon rank sum test with continuity correction	greater
campbell2017_lvl2	s30.b2_tanycytes1	c(W = 95301)	0.925018	-8.84124e-06	Wilcoxon rank sum test with continuity correction	greater
campbell2017_lvl2	s31.b2_tanycytes2	c(W = 99002)	0.8653	-2.29259e-05	Wilcoxon rank sum test with continuity correction	greater
campbell2017_lvl2	s32.Astrocytes	c(W = 107309)	0.700498	-3.78116e-05	Wilcoxon rank sum test with continuity correction	greater
campbell2017_lvl2	s33.a1_tanycytes2	c(W = 102105.5)	0.861327	-2.423e-05	Wilcoxon rank sum test with continuity correction	greater
campbell2017_lvl2	s34.a1_tanycytes1	c(W = 100413)	0.861626	-6.88263e-05	Wilcoxon rank sum test with continuity correction	greater
campbell2017_lvl2	s35.b1_tanycytes	c(W = 96491)	0.902663	-5.52564e-05	Wilcoxon rank sum test with continuity correction	greater
campbell2017_lvl2	s36.a2_tanycytes	c(W = 97022)	0.90699	-1.05517e-05	Wilcoxon rank sum test with continuity correction	greater
chen2017	Astro	c(W = 53044)	0.582482	-1.91992e-05	Wilcoxon rank sum test with continuity correction	greater
chen2017	Ependy	c(W = 47323)	0.831023	-2.62364e-05	Wilcoxon rank sum test with continuity correction	greater
chen2017	Epith1	c(W = 52752)	0.588995	-8.33884e-06	Wilcoxon rank sum test with continuity correction	greater
chen2017	Epith2	c(W = 50012)	0.729974	-3.01833e-06	Wilcoxon rank sum test with continuity correction	greater
chen2017	GABA1	c(W = 53911)	0.525702	-2.17851e-05	Wilcoxon rank sum test with continuity correction	greater
chen2017	GABA10	c(W = 65540)	0.0284578	4.42219e-05	Wilcoxon rank sum test with continuity correction	greater
chen2017	GABA11	c(W = 49802)	0.785138	-2.36671e-05	Wilcoxon rank sum test with continuity correction	greater
chen2017	GABA12	c(W = 52037)	0.644668	-3.78486e-05	Wilcoxon rank sum test with continuity correction	greater
chen2017	GABA13	c(W = 54512)	0.485411	-4.42868e-05	Wilcoxon rank sum test with continuity correction	greater
chen2017	GABA14	c(W = 56277)	0.369938	-7.51307e-06	Wilcoxon rank sum test with continuity correction	greater
chen2017	GABA15	c(W = 64432)	0.060556	-5.21779e-05	Wilcoxon rank sum test with continuity correction	greater
chen2017	GABA16	c(W = 56912)	0.326661	-8.33952e-05	Wilcoxon rank sum test with continuity correction	greater
chen2017	GABA17	c(W = 50007)	0.749544	-5.30919e-05	Wilcoxon rank sum test with continuity correction	greater
chen2017	GABA18	c(W = 49957)	0.78314	-3.46402e-05	Wilcoxon rank sum test with continuity correction	greater
chen2017	GABA2	c(W = 51096)	0.72914	-7.40495e-06	Wilcoxon rank sum test with continuity correction	greater
chen2017	GABA3	c(W = 56432)	0.357289	-2.89698e-05	Wilcoxon rank sum test with continuity correction	greater
chen2017	GABA4	c(W = 59111)	0.173139	-1.13881e-06	Wilcoxon rank sum test with continuity correction	greater
chen2017	GABA5	c(W = 54896)	0.461263	-4.7646e-05	Wilcoxon rank sum test with continuity correction	greater
chen2017	GABA6	c(W = 57953)	0.255511	-3.20033e-05	Wilcoxon rank sum test with continuity correction	greater
chen2017	GABA7	c(W = 55457)	0.407625	-7.99117e-05	Wilcoxon rank sum test with continuity correction	greater
chen2017	GABA8	c(W = 62212.5)	0.0793426	-2.67554e-05	Wilcoxon rank sum test with continuity correction	greater
chen2017	GABA9	c(W = 56897.5)	0.294669	-3.21756e-05	Wilcoxon rank sum test with continuity correction	greater
chen2017	Glu1	c(W = 71190)	2.15614e-05	5.13055e-05	Wilcoxon rank sum test with continuity correction	greater
chen2017	Glu10	c(W = 71237)	4.108e-05	3.19795e-05	Wilcoxon rank sum test with continuity correction	greater
chen2017	Glu11	c(W = 55102)	0.438082	-4.71013e-05	Wilcoxon rank sum test with continuity correction	greater
chen2017	Glu12	c(W = 60228)	0.125063	-2.53621e-05	Wilcoxon rank sum test with continuity correction	greater
chen2017	Glu13	c(W = 65492)	0.0145783	5.93125e-05	Wilcoxon rank sum test with continuity correction	greater
chen2017	Glu14	c(W = 66748)	0.0155734	5.31296e-05	Wilcoxon rank sum test with continuity correction	greater
chen2017	Glu15	c(W = 68785)	0.00401598	3.60502e-06	Wilcoxon rank sum test with continuity correction	greater
chen2017	Glu2	c(W = 64736.5)	0.017401	1.58655e-05	Wilcoxon rank sum test with continuity correction	greater
chen2017	Glu3	c(W = 59515)	0.141599	-5.45453e-06	Wilcoxon rank sum test with continuity correction	greater
chen2017	Glu4	c(W = 56313)	0.37998	-7.39831e-05	Wilcoxon rank sum test with continuity correction	greater
chen2017	Glu5	c(W = 64705)	0.0579424	-3.38709e-05	Wilcoxon rank sum test with continuity correction	greater
chen2017	Glu6	c(W = 66811)	0.0214454	8.57498e-06	Wilcoxon rank sum test with continuity correction	greater
chen2017	Glu7	c(W = 63463)	0.0838858	-4.85485e-05	Wilcoxon rank sum test with continuity correction	greater
chen2017	Glu8	c(W = 70192)	0.00735192	2.88218e-05	Wilcoxon rank sum test with continuity correction	greater
chen2017	Glu9	c(W = 64023.5)	0.0371233	4.49542e-06	Wilcoxon rank sum test with continuity correction	greater
chen2017	Hista	c(W = 55388)	0.414864	-9.57079e-05	Wilcoxon rank sum test with continuity correction	greater
chen2017	IMO	c(W = 46807)	0.878882	-7.80423e-05	Wilcoxon rank sum test with continuity correction	greater
chen2017	MO	c(W = 47683)	0.840754	-8.20599e-05	Wilcoxon rank sum test with continuity correction	greater
chen2017	Macro	c(W = 41840.5)	0.973946	-6.40418e-05	Wilcoxon rank sum test with continuity correction	greater
chen2017	Micro	c(W = 54448.5)	0.486441	-6.01271e-05	Wilcoxon rank sum test with continuity correction	greater
chen2017	OPC	c(W = 53584)	0.539237	-4.15808e-05	Wilcoxon rank sum test with continuity correction	greater
chen2017	POPC	c(W = 50159)	0.77544	-4.41007e-05	Wilcoxon rank sum test with continuity correction	greater
chen2017	Tany	c(W = 42391)	0.952156	-1.60493e-05	Wilcoxon rank sum test with continuity correction	greater
kimVMH2019_10x	Dlk1_1	c(W = 89759)	0.128987	-2.64194e-05	Wilcoxon rank sum test with continuity correction	greater
kimVMH2019_10x	Dlk1_2	c(W = 64244.5)	0.941631	-3.88705e-05	Wilcoxon rank sum test with continuity correction	greater
kimVMH2019_10x	Dlk1_3	c(W = 68192)	0.844278	-3.11136e-06	Wilcoxon rank sum test with continuity correction	greater
kimVMH2019_10x	Dlk1_4	c(W = 65348)	0.931412	-9.75802e-06	Wilcoxon rank sum test with continuity correction	greater
kimVMH2019_10x	Dlk1_5	c(W = 80045)	0.401974	-7.64588e-05	Wilcoxon rank sum test with continuity correction	greater
kimVMH2019_10x	Dlk1_6	c(W = 71529.5)	0.810351	-8.21934e-05	Wilcoxon rank sum test with continuity correction	greater
kimVMH2019_10x	Esr1_1	c(W = 86884)	0.185607	-5.25342e-05	Wilcoxon rank sum test with continuity correction	greater
kimVMH2019_10x	Esr1_2_3	c(W = 80876)	0.397793	-3.40406e-05	Wilcoxon rank sum test with continuity correction	greater
kimVMH2019_10x	Esr1_4	c(W = 107300)	0.00185987	0.0266216	Wilcoxon rank sum test with continuity correction	greater
kimVMH2019_10x	Esr1_5	c(W = 101798)	0.00566238	4.4832e-05	Wilcoxon rank sum test with continuity correction	greater
kimVMH2019_10x	Esr1_6	c(W = 98141.5)	0.0178365	6.72001e-05	Wilcoxon rank sum test with continuity correction	greater
kimVMH2019_10x	Esr1_7	c(W = 101025)	0.0100587	1.87602e-05	Wilcoxon rank sum test with continuity correction	greater
kimVMH2019_10x	Nr5a1_1	c(W = 86954)	0.125048	-1.76869e-05	Wilcoxon rank sum test with continuity correction	greater
kimVMH2019_10x	Nr5a1_11	c(W = 81038)	0.380314	-8.36151e-06	Wilcoxon rank sum test with continuity correction	greater
kimVMH2019_10x	Nr5a1_2	c(W = 78546)	0.491772	-3.21055e-05	Wilcoxon rank sum test with continuity correction	greater
kimVMH2019_10x	Nr5a1_3	c(W = 77175)	0.557025	-5.0895e-05	Wilcoxon rank sum test with continuity correction	greater
kimVMH2019_10x	Nr5a1_4_5	c(W = 73232)	0.725577	-5.80978e-05	Wilcoxon rank sum test with continuity correction	greater
kimVMH2019_10x	Nr5a1_6	c(W = 79119)	0.45871	-6.52481e-05	Wilcoxon rank sum test with continuity correction	greater
kimVMH2019_10x	Nr5a1_7	c(W = 78667.5)	0.487374	-4.74015e-05	Wilcoxon rank sum test with continuity correction	greater
kimVMH2019_10x	Nr5a1_8	c(W = 76567)	0.59326	-7.55619e-05	Wilcoxon rank sum test with continuity correction	greater
kimVMH2019_10x	Nr5a1_9_10	c(W = 84010)	0.25037	-2.4107e-05	Wilcoxon rank sum test with continuity correction	greater
kimVMH2019_10x	Nr5a1_Foxp2_1	c(W = 65102)	0.951102	-1.15074e-05	Wilcoxon rank sum test with continuity correction	greater
kimVMH2019_10x	Nr5a1_Foxp2_2	c(W = 80774)	0.379756	-3.91977e-05	Wilcoxon rank sum test with continuity correction	greater
kimVMH2019_10x	Nup62cl	c(W = 75507)	0.638959	-5.75061e-05	Wilcoxon rank sum test with continuity correction	greater
kimVMH2019_10x	Satb2_1	c(W = 74921)	0.652116	-4.91623e-05	Wilcoxon rank sum test with continuity correction	greater
kimVMH2019_10x	Satb2_2	c(W = 68421)	0.906745	-2.78622e-06	Wilcoxon rank sum test with continuity correction	greater
kimVMH2019_10x	Satb2_3	c(W = 78111)	0.51249	-5.0242e-05	Wilcoxon rank sum test with continuity correction	greater
kimVMH2019_10x	Scgn	c(W = 67685.5)	0.948736	0	Wilcoxon rank sum test with continuity correction	greater
kimVMH2019_10x	Tsix_Esr1	c(W = 88022.5)	0.119853	-4.75228e-05	Wilcoxon rank sum test with continuity correction	greater
kimVMH2019_smartseq	Astro_Aqp4	c(W = 92827)	0.728269	-1.25136e-05	Wilcoxon rank sum test with continuity correction	greater
kimVMH2019_smartseq	Clic4	c(W = 103637)	0.323652	-4.47543e-05	Wilcoxon rank sum test with continuity correction	greater
kimVMH2019_smartseq	Dlk1_1_Il1rapl2	c(W = 129920)	0.0018275	1.21128e-05	Wilcoxon rank sum test with continuity correction	greater
kimVMH2019_smartseq	Dlk1_2_Nts	c(W = 92591)	0.7537	-6.95334e-05	Wilcoxon rank sum test with continuity correction	greater
kimVMH2019_smartseq	Dlk1_3_Maob	c(W = 94142)	0.686672	-2.32111e-05	Wilcoxon rank sum test with continuity correction	greater
kimVMH2019_smartseq	Dlk1_4_Maob	c(W = 94338)	0.709246	-2.50256e-05	Wilcoxon rank sum test with continuity correction	greater
kimVMH2019_smartseq	Dlk1_5_Egflam	c(W = 94526)	0.701117	-9.29832e-07	Wilcoxon rank sum test with continuity correction	greater
kimVMH2019_smartseq	Dlk1_6_F2rl2	c(W = 110242)	0.0310042	4.83268e-05	Wilcoxon rank sum test with continuity correction	greater
kimVMH2019_smartseq	Endo_Gja5	c(W = 92903)	0.753999	-6.01171e-06	Wilcoxon rank sum test with continuity correction	greater
kimVMH2019_smartseq	Esr1_1_Insm2	c(W = 106654)	0.23533	-2.75383e-05	Wilcoxon rank sum test with continuity correction	greater
kimVMH2019_smartseq	Esr1_2_Samd9l_Rorb	c(W = 97055)	0.590045	-1.13839e-06	Wilcoxon rank sum test with continuity correction	greater
kimVMH2019_smartseq	Esr1_3_Samd9l_Nmur2	c(W = 93500)	0.727204	-1.18071e-05	Wilcoxon rank sum test with continuity correction	greater
kimVMH2019_smartseq	Esr1_4_Smoc2	c(W = 112596.5)	0.103511	-8.86525e-06	Wilcoxon rank sum test with continuity correction	greater
kimVMH2019_smartseq	Esr1_5_Ngf	c(W = 116298)	0.0541326	-2.639e-05	Wilcoxon rank sum test with continuity correction	greater
kimVMH2019_smartseq	Esr1_6_Ctxn3	c(W = 112826)	0.0855594	-7.00983e-05	Wilcoxon rank sum test with continuity correction	greater
kimVMH2019_smartseq	Irx5	c(W = 136931.5)	8.55572e-05	3.97632e-05	Wilcoxon rank sum test with continuity correction	greater
kimVMH2019_smartseq	Lhx1_1	c(W = 102021)	0.387715	-6.19036e-05	Wilcoxon rank sum test with continuity correction	greater
kimVMH2019_smartseq	Lhx1_2	c(W = 91911)	0.780266	-4.32083e-05	Wilcoxon rank sum test with continuity correction	greater
kimVMH2019_smartseq	Lhx9	c(W = 110367)	0.117063	-4.01403e-05	Wilcoxon rank sum test with continuity correction	greater
kimVMH2019_smartseq	Micro_Siglech	c(W = 85381.5)	0.904425	-4.66041e-05	Wilcoxon rank sum test with continuity correction	greater
kimVMH2019_smartseq	Nfib_1_Prdm13	c(W = 102977.5)	0.345768	-6.70943e-05	Wilcoxon rank sum test with continuity correction	greater
kimVMH2019_smartseq	Nfib_2_Car4	c(W = 121966)	0.0126677	7.82022e-05	Wilcoxon rank sum test with continuity correction	greater
kimVMH2019_smartseq	Nr5a1_1_Npffr2	c(W = 123282)	0.00925666	3.28649e-05	Wilcoxon rank sum test with continuity correction	greater
kimVMH2019_smartseq	Nr5a1_2_Ctxn3	c(W = 93123)	0.709017	-4.6932e-05	Wilcoxon rank sum test with continuity correction	greater
kimVMH2019_smartseq	Nr5a1_3_Car8	c(W = 99052)	0.506383	-4.26802e-05	Wilcoxon rank sum test with continuity correction	greater
kimVMH2019_smartseq	Nr5a1_4_7_Glipr1	c(W = 95724)	0.621337	-5.22997e-05	Wilcoxon rank sum test with continuity correction	greater
kimVMH2019_smartseq	Nr5a1_8_Tcf7l2	c(W = 92735)	0.727371	-2.69942e-05	Wilcoxon rank sum test with continuity correction	greater
kimVMH2019_smartseq	Nr5a1_9_11_Rorb	c(W = 117839)	0.0383396	5.92096e-06	Wilcoxon rank sum test with continuity correction	greater
kimVMH2019_smartseq	Nr5a1_Foxp2_1_Prdm13	c(W = 83032)	0.948189	-6.37428e-05	Wilcoxon rank sum test with continuity correction	greater
kimVMH2019_smartseq	Nr5a1_Foxp2_2_C1ql2	c(W = 95118)	0.657385	-3.81741e-05	Wilcoxon rank sum test with continuity correction	greater
kimVMH2019_smartseq	Nr5a1_Foxp2_3	c(W = 114581)	0.0156957	5.94986e-05	Wilcoxon rank sum test with continuity correction	greater
kimVMH2019_smartseq	Nr5a1_Smoc2_low	c(W = 89284)	0.915099	0	Wilcoxon rank sum test with continuity correction	greater
kimVMH2019_smartseq	Nup62cl	c(W = 104352)	0.252624	-2.08769e-05	Wilcoxon rank sum test with continuity correction	greater
kimVMH2019_smartseq	Oligo_Opalin_1	c(W = 84855.5)	0.954424	0	Wilcoxon rank sum test with continuity correction	greater
kimVMH2019_smartseq	Oligo_Opalin_2	c(W = 82293)	0.948114	-2.31599e-05	Wilcoxon rank sum test with continuity correction	greater
kimVMH2019_smartseq	PVM_Mrc1	c(W = 88435)	0.857253	-6.81109e-05	Wilcoxon rank sum test with continuity correction	greater
kimVMH2019_smartseq	SMC	c(W = 76576.5)	0.986683	-9.65913e-05	Wilcoxon rank sum test with continuity correction	greater
kimVMH2019_smartseq	Satb2_Calcrl	c(W = 89031)	0.847413	-1.53554e-05	Wilcoxon rank sum test with continuity correction	greater
kimVMH2019_smartseq	Satb2_Six3	c(W = 96201)	0.636401	-7.12126e-05	Wilcoxon rank sum test with continuity correction	greater
kimVMH2019_smartseq	Scgn	c(W = 95439)	0.670991	-1.47283e-05	Wilcoxon rank sum test with continuity correction	greater
kimVMH2019_smartseq	Slc18a3	c(W = 112646.5)	0.103776	-2.211e-05	Wilcoxon rank sum test with continuity correction	greater
kimVMH2019_smartseq	Slc32a1_1_Nup62cl	c(W = 96712)	0.617919	-6.74913e-05	Wilcoxon rank sum test with continuity correction	greater
kimVMH2019_smartseq	Slc32a1_2	c(W = 106161)	0.241063	-2.75664e-05	Wilcoxon rank sum test with continuity correction	greater
kimVMH2019_smartseq	Tbx3_1_Tac2	c(W = 101090)	0.417125	-3.55204e-05	Wilcoxon rank sum test with continuity correction	greater
kimVMH2019_smartseq	Tbx3_2_Anxa2	c(W = 119878)	0.0242906	4.63238e-05	Wilcoxon rank sum test with continuity correction	greater
kimVMH2019_smartseq	Tbx3_3_Slc14a1	c(W = 113707)	0.104485	-1.50221e-05	Wilcoxon rank sum test with continuity correction	greater
kimVMH2019_smartseq	Tsix_Esr1_1_Gabrg3	c(W = 81183.5)	0.973209	0	Wilcoxon rank sum test with continuity correction	greater
kimVMH2019_smartseq	Tsix_Esr1_2_Twist2	c(W = 109693)	0.148107	-4.20938e-05	Wilcoxon rank sum test with continuity correction	greater
mikkelsen2019	GABA_1	c(W = 105887)	0.0957144	-1.59438e-05	Wilcoxon rank sum test with continuity correction	greater
mikkelsen2019	GABA_10	c(W = 96224)	0.275573	-1.88554e-05	Wilcoxon rank sum test with continuity correction	greater
mikkelsen2019	GABA_11	c(W = 94773)	0.325817	-3.3296e-06	Wilcoxon rank sum test with continuity correction	greater
mikkelsen2019	GABA_12	c(W = 89111.5)	0.554661	-5.33125e-05	Wilcoxon rank sum test with continuity correction	greater
mikkelsen2019	GABA_13	c(W = 84913)	0.721935	-1.9968e-05	Wilcoxon rank sum test with continuity correction	greater
mikkelsen2019	GABA_14	c(W = 97876.5)	0.198331	-4.33377e-05	Wilcoxon rank sum test with continuity correction	greater
mikkelsen2019	GABA_15	c(W = 86496.5)	0.675902	-5.47792e-07	Wilcoxon rank sum test with continuity correction	greater
mikkelsen2019	GABA_2	c(W = 89403)	0.548106	-4.50605e-05	Wilcoxon rank sum test with continuity correction	greater
mikkelsen2019	GABA_3	c(W = 115096)	0.0108002	6.81607e-05	Wilcoxon rank sum test with continuity correction	greater
mikkelsen2019	GABA_4	c(W = 94369)	0.319297	-6.91669e-06	Wilcoxon rank sum test with continuity correction	greater
mikkelsen2019	GABA_5	c(W = 100971)	0.176426	-5.62758e-05	Wilcoxon rank sum test with continuity correction	greater
mikkelsen2019	GABA_6	c(W = 97313)	0.233847	-2.11819e-05	Wilcoxon rank sum test with continuity correction	greater
mikkelsen2019	GABA_7	c(W = 99103)	0.235775	-1.53682e-05	Wilcoxon rank sum test with continuity correction	greater
mikkelsen2019	GABA_8	c(W = 96559.5)	0.273304	-4.68179e-05	Wilcoxon rank sum test with continuity correction	greater
mikkelsen2019	GABA_9	c(W = 114214)	0.00868148	1.64627e-05	Wilcoxon rank sum test with continuity correction	greater
mikkelsen2019	Glut_1	c(W = 85084)	0.679239	-0.000721847	Wilcoxon rank sum test with continuity correction	greater
mikkelsen2019	Glut_10	c(W = 93032)	0.384781	-5.01226e-06	Wilcoxon rank sum test with continuity correction	greater
mikkelsen2019	Glut_11	c(W = 87625)	0.646677	-1.78982e-05	Wilcoxon rank sum test with continuity correction	greater
mikkelsen2019	Glut_12	c(W = 96071)	0.310145	-2.37079e-05	Wilcoxon rank sum test with continuity correction	greater
mikkelsen2019	Glut_13	c(W = 110630)	0.0228527	8.68675e-05	Wilcoxon rank sum test with continuity correction	greater
mikkelsen2019	Glut_14	c(W = 126204)	0.000370164	6.002e-05	Wilcoxon rank sum test with continuity correction	greater
mikkelsen2019	Glut_15	c(W = 102138)	0.0940426	-6.28433e-05	Wilcoxon rank sum test with continuity correction	greater
mikkelsen2019	Glut_2	c(W = 109111)	0.0503559	-1.43237e-05	Wilcoxon rank sum test with continuity correction	greater
mikkelsen2019	Glut_3	c(W = 88815)	0.566973	-3.4518e-05	Wilcoxon rank sum test with continuity correction	greater
mikkelsen2019	Glut_4	c(W = 113961)	0.0150271	3.37017e-05	Wilcoxon rank sum test with continuity correction	greater
mikkelsen2019	Glut_5	c(W = 105796)	0.0934868	-1.1393e-05	Wilcoxon rank sum test with continuity correction	greater
mikkelsen2019	Glut_6	c(W = 100839.5)	0.180614	-9.98021e-06	Wilcoxon rank sum test with continuity correction	greater
mikkelsen2019	Glut_7	c(W = 92742)	0.397425	-2.56421e-05	Wilcoxon rank sum test with continuity correction	greater
mikkelsen2019	Glut_8	c(W = 105925)	0.0671143	-5.09256e-05	Wilcoxon rank sum test with continuity correction	greater
mikkelsen2019	Glut_9	c(W = 104176)	0.111542	-3.86999e-05	Wilcoxon rank sum test with continuity correction	greater
mikkelsen2019	Nonneuronal_1	c(W = 76471)	0.927937	-3.52777e-05	Wilcoxon rank sum test with continuity correction	greater
mikkelsen2019	Nonneuronal_10	c(W = 80817)	0.887507	-2.08474e-05	Wilcoxon rank sum test with continuity correction	greater
mikkelsen2019	Nonneuronal_11	c(W = 90217.5)	0.513454	-4.24477e-05	Wilcoxon rank sum test with continuity correction	greater
mikkelsen2019	Nonneuronal_12	c(W = 100854)	0.120463	-3.77644e-06	Wilcoxon rank sum test with continuity correction	greater
mikkelsen2019	Nonneuronal_13	c(W = 73272.5)	0.965675	-3.41682e-05	Wilcoxon rank sum test with continuity correction	greater
mikkelsen2019	Nonneuronal_2	c(W = 79931.5)	0.864549	-3.54827e-05	Wilcoxon rank sum test with continuity correction	greater
mikkelsen2019	Nonneuronal_3	c(W = 80628)	0.862203	-6.31842e-07	Wilcoxon rank sum test with continuity correction	greater
mikkelsen2019	Nonneuronal_4	c(W = 88141)	0.62471	-3.89533e-05	Wilcoxon rank sum test with continuity correction	greater
mikkelsen2019	Nonneuronal_5	c(W = 77322.5)	0.932884	-7.24756e-06	Wilcoxon rank sum test with continuity correction	greater
mikkelsen2019	Nonneuronal_6	c(W = 85873)	0.69292	-1.23776e-05	Wilcoxon rank sum test with continuity correction	greater
mikkelsen2019	Nonneuronal_7	c(W = 77787)	0.956133	0	Wilcoxon rank sum test with continuity correction	greater
mikkelsen2019	Nonneuronal_8	c(W = 91138)	0.46602	-5.85083e-06	Wilcoxon rank sum test with continuity correction	greater
mikkelsen2019	Nonneuronal_9	c(W = 82932.5)	0.844446	-1.72348e-05	Wilcoxon rank sum test with continuity correction	greater
moffitt2018	Astrocytes_1	c(W = 122826)	0.684289	-3.5645e-05	Wilcoxon rank sum test with continuity correction	greater
moffitt2018	Astrocytes_2	c(W = 131382)	0.395176	-4.9095e-05	Wilcoxon rank sum test with continuity correction	greater
moffitt2018	Endothelial_1	c(W = 127135.5)	0.548695	-1.22855e-05	Wilcoxon rank sum test with continuity correction	greater
moffitt2018	Endothelial_2	c(W = 132747)	0.337929	-4.30398e-05	Wilcoxon rank sum test with continuity correction	greater
moffitt2018	Endothelial_3	c(W = 128920)	0.490335	-2.4609e-05	Wilcoxon rank sum test with continuity correction	greater
moffitt2018	Ependymal_1	c(W = 114031)	0.90573	-3.39665e-05	Wilcoxon rank sum test with continuity correction	greater
moffitt2018	Fibroblast_1	c(W = 112821)	0.922249	-1.824e-05	Wilcoxon rank sum test with continuity correction	greater
moffitt2018	Immature_oligodendrocyte_1	c(W = 109384)	0.915355	-4.37987e-05	Wilcoxon rank sum test with continuity correction	greater
moffitt2018	Immature_oligodendrocyte_2	c(W = 105609)	0.96794	-4.89147e-05	Wilcoxon rank sum test with continuity correction	greater
moffitt2018	Macrophage_1	c(W = 117032)	0.870133	-8.22684e-05	Wilcoxon rank sum test with continuity correction	greater
moffitt2018	Mature_oligodendrocyte_1	c(W = 113931.5)	0.87831	-4.77151e-05	Wilcoxon rank sum test with continuity correction	greater
moffitt2018	Mature_oligodendrocyte_2	c(W = 112894.5)	0.895321	-1.52793e-05	Wilcoxon rank sum test with continuity correction	greater
moffitt2018	Mature_oligodendrocyte_3	c(W = 115912.5)	0.851586	-6.2877e-06	Wilcoxon rank sum test with continuity correction	greater
moffitt2018	Mature_oligodendrocyte_4	c(W = 115764)	0.836816	-3.78803e-05	Wilcoxon rank sum test with continuity correction	greater
moffitt2018	Mature_oligodendrocyte_5	c(W = 114237)	0.834235	-8.17911e-05	Wilcoxon rank sum test with continuity correction	greater
moffitt2018	Mature_oligodendrocyte_6	c(W = 123113)	0.733055	-7.58559e-06	Wilcoxon rank sum test with continuity correction	greater
moffitt2018	Microglia_1	c(W = 107509)	0.957459	-5.18742e-05	Wilcoxon rank sum test with continuity correction	greater
moffitt2018	Microglia_2	c(W = 116773)	0.875523	-1.85756e-05	Wilcoxon rank sum test with continuity correction	greater
moffitt2018	Mural_1	c(W = 116671)	0.846283	-4.75598e-05	Wilcoxon rank sum test with continuity correction	greater
moffitt2018	Mural_2	c(W = 119015)	0.805272	-1.25673e-05	Wilcoxon rank sum test with continuity correction	greater
moffitt2018	Newly_formed_oligodendrocyte_1	c(W = 100841)	0.980162	-2.3208e-05	Wilcoxon rank sum test with continuity correction	greater
moffitt2018	e10_Glut_Meis2	c(W = 161622)	0.0102511	5.50481e-06	Wilcoxon rank sum test with continuity correction	greater
moffitt2018	e11_Glut_Shox2	c(W = 149971)	0.0615707	-4.52472e-05	Wilcoxon rank sum test with continuity correction	greater
moffitt2018	e12_Nos1_Foxp2	c(W = 168203)	0.00185181	3.3319e-05	Wilcoxon rank sum test with continuity correction	greater
moffitt2018	e13_Ghrh_C1ql1	c(W = 169242)	0.00189272	5.89021e-05	Wilcoxon rank sum test with continuity correction	greater
moffitt2018	e15_Ucn3_Brs3	c(W = 153887)	0.0341362	6.58175e-05	Wilcoxon rank sum test with continuity correction	greater
moffitt2018	e16_Sst_Cartpt	c(W = 142646.5)	0.134506	-1.53976e-05	Wilcoxon rank sum test with continuity correction	greater
moffitt2018	e17_Th_Adcyap1	c(W = 163713.5)	0.00553161	4.16906e-05	Wilcoxon rank sum test with continuity correction	greater
moffitt2018	e19_Ghrh_Trh	c(W = 156546)	0.0137807	1.63594e-05	Wilcoxon rank sum test with continuity correction	greater
moffitt2018	e1_Glut	c(W = 187951)	2.60657e-05	0.0229138	Wilcoxon rank sum test with continuity correction	greater
moffitt2018	e20_Crh	c(W = 164822)	0.00226629	2.03432e-05	Wilcoxon rank sum test with continuity correction	greater
moffitt2018	e21_Glut_Rxpf3	c(W = 165089)	0.00174296	6.52526e-05	Wilcoxon rank sum test with continuity correction	greater
moffitt2018	e22_Gal_Ucn3	c(W = 137152)	0.217113	-7.91782e-05	Wilcoxon rank sum test with continuity correction	greater
moffitt2018	e23_Reln_Etv1	c(W = 126715)	0.567738	-1.87337e-05	Wilcoxon rank sum test with continuity correction	greater
moffitt2018	e24_Gal_Rxfp1_	c(W = 142513)	0.102261	-6.21105e-05	Wilcoxon rank sum test with continuity correction	greater
moffitt2018	e2_Tac1_Fezf1	c(W = 159601)	0.0199909	3.06014e-05	Wilcoxon rank sum test with continuity correction	greater
moffitt2018	e3_Cartpt_Isl1	c(W = 167929.5)	0.00464695	1.44726e-05	Wilcoxon rank sum test with continuity correction	greater
moffitt2018	e4_Trh_Angpt1	c(W = 181501)	0.000141384	0.0254339	Wilcoxon rank sum test with continuity correction	greater
moffitt2018	e5_Adcyap1_Nkx2.1	c(W = 161963)	0.0136928	3.26951e-05	Wilcoxon rank sum test with continuity correction	greater
moffitt2018	e6_Nos1_Trp73	c(W = 163700)	0.00668659	3.33043e-05	Wilcoxon rank sum test with continuity correction	greater
moffitt2018	e7_Reln_C1ql1	c(W = 155297)	0.0264125	5.46768e-05	Wilcoxon rank sum test with continuity correction	greater
moffitt2018	e8_Cck_Ebf3	c(W = 156491)	0.00637497	2.30694e-05	Wilcoxon rank sum test with continuity correction	greater
moffitt2018	e9_Glut_Tcf7l2	c(W = 142084)	0.160522	-5.82413e-07	Wilcoxon rank sum test with continuity correction	greater
moffitt2018	h1_Gaba_Slc17a6	c(W = 167181)	0.000651802	4.45235e-05	Wilcoxon rank sum test with continuity correction	greater
moffitt2018	h2_Nts_Slc17a8	c(W = 137800)	0.268343	-2.11149e-05	Wilcoxon rank sum test with continuity correction	greater
moffitt2018	h3_Slc32a1_Gsc	c(W = 168871)	0.00171662	6.17835e-06	Wilcoxon rank sum test with continuity correction	greater
moffitt2018	i10_Tac1_Nts	c(W = 124471)	0.610194	-3.59948e-05	Wilcoxon rank sum test with continuity correction	greater
moffitt2018	i11_Gaba	c(W = 149867)	0.0709772	-2.36415e-06	Wilcoxon rank sum test with continuity correction	greater
moffitt2018	i12_Gaba	c(W = 139757)	0.220257	-6.54906e-06	Wilcoxon rank sum test with continuity correction	greater
moffitt2018	i13_Gaba	c(W = 163591.5)	0.00839019	5.01838e-05	Wilcoxon rank sum test with continuity correction	greater
moffitt2018	i14_Avp_Cck	c(W = 153029)	0.0289352	5.7484e-05	Wilcoxon rank sum test with continuity correction	greater
moffitt2018	i15_Gaba	c(W = 146192)	0.124622	-7.35404e-05	Wilcoxon rank sum test with continuity correction	greater
moffitt2018	i16_Gal_Th	c(W = 146752)	0.117725	-6.67876e-05	Wilcoxon rank sum test with continuity correction	greater
moffitt2018	i17_Th_Nos1	c(W = 149716)	0.0729778	-4.13742e-05	Wilcoxon rank sum test with continuity correction	greater
moffitt2018	i18_Gal_Tac2	c(W = 161438)	0.0128759	6.51487e-05	Wilcoxon rank sum test with continuity correction	greater
moffitt2018	i1_Gaba	c(W = 160367)	0.0155555	5.35054e-05	Wilcoxon rank sum test with continuity correction	greater
moffitt2018	i20_Gal_Moxd1	c(W = 143093.5)	0.160398	-2.98602e-05	Wilcoxon rank sum test with continuity correction	greater
moffitt2018	i21_Sst_Pou3f3	c(W = 132791)	0.387682	-1.28976e-05	Wilcoxon rank sum test with continuity correction	greater
moffitt2018	i22_Gal_Pmaip1	c(W = 155370)	0.0238854	5.55218e-05	Wilcoxon rank sum test with continuity correction	greater
moffitt2018	i23_Crh_Nts	c(W = 156608)	0.0244853	4.3414e-05	Wilcoxon rank sum test with continuity correction	greater
moffitt2018	i24_Nmu	c(W = 156002)	0.0302444	4.82415e-05	Wilcoxon rank sum test with continuity correction	greater
moffitt2018	i25_Npy_Etv1	c(W = 172022)	0.00081048	5.32551e-05	Wilcoxon rank sum test with continuity correction	greater
moffitt2018	i26_Tac1_Prok2	c(W = 133270)	0.31768	-3.93845e-05	Wilcoxon rank sum test with continuity correction	greater
moffitt2018	i27_Th_Trh	c(W = 149860.5)	0.0574721	-3.48142e-05	Wilcoxon rank sum test with continuity correction	greater
moffitt2018	i28_Gaba_Six6	c(W = 119805)	0.737265	-8.14526e-06	Wilcoxon rank sum test with continuity correction	greater
moffitt2018	i29_Gaba_Igsf1	c(W = 144694.5)	0.128764	-9.29973e-06	Wilcoxon rank sum test with continuity correction	greater
moffitt2018	i2_Tac1_Pdyn	c(W = 107930.5)	0.918639	-3.03319e-05	Wilcoxon rank sum test with continuity correction	greater
moffitt2018	i30_Vip	c(W = 143597)	0.0877402	-1.17304e-05	Wilcoxon rank sum test with continuity correction	greater
moffitt2018	i31_Calca	c(W = 146195)	0.079911	-4.44897e-05	Wilcoxon rank sum test with continuity correction	greater
moffitt2018	i32_Sst_Npy	c(W = 150786)	0.027342	4.96018e-05	Wilcoxon rank sum test with continuity correction	greater
moffitt2018	i35_Crh_Tac2	c(W = 150280)	0.045136	6.73623e-05	Wilcoxon rank sum test with continuity correction	greater
moffitt2018	i37_Bdnf_Chrm2	c(W = 161101)	0.00551007	5.95816e-05	Wilcoxon rank sum test with continuity correction	greater
moffitt2018	i38_Kiss1_Th	c(W = 144168)	0.103976	-5.17421e-05	Wilcoxon rank sum test with continuity correction	greater
moffitt2018	i39_Gaba	c(W = 150226)	0.0306141	3.79749e-05	Wilcoxon rank sum test with continuity correction	greater
moffitt2018	i3_Penk_Nts	c(W = 107776)	0.928834	-8.29324e-05	Wilcoxon rank sum test with continuity correction	greater
moffitt2018	i40_Sst_Reln	c(W = 149711)	0.0297415	5.84934e-05	Wilcoxon rank sum test with continuity correction	greater
moffitt2018	i41_Npy_Penk	c(W = 131353)	0.406437	-3.08218e-05	Wilcoxon rank sum test with continuity correction	greater
moffitt2018	i42_Pthlh	c(W = 128328)	0.511702	-7.18479e-05	Wilcoxon rank sum test with continuity correction	greater
moffitt2018	i43_Chat	c(W = 138870)	0.185912	-7.51611e-07	Wilcoxon rank sum test with continuity correction	greater
moffitt2018	i44_Th_Cxcl14	c(W = 121416)	0.748405	-1.09781e-05	Wilcoxon rank sum test with continuity correction	greater
moffitt2018	i45_Bdnf_Pmaip1	c(W = 143880)	0.0426356	3.34258e-05	Wilcoxon rank sum test with continuity correction	greater
moffitt2018	i4_Gaba_Mylk	c(W = 111259)	0.895394	-5.26754e-06	Wilcoxon rank sum test with continuity correction	greater
moffitt2018	i5_Gaba_Pou3f3	c(W = 155554.5)	0.0397678	1.83513e-05	Wilcoxon rank sum test with continuity correction	greater
moffitt2018	i6_Avp_Nms	c(W = 133339)	0.362906	-9.61277e-06	Wilcoxon rank sum test with continuity correction	greater
moffitt2018	i7_Gaba	c(W = 140909.5)	0.218411	-6.94545e-05	Wilcoxon rank sum test with continuity correction	greater
moffitt2018	i8_Gal_Amigo2	c(W = 162042)	0.0146806	2.51157e-05	Wilcoxon rank sum test with continuity correction	greater
moffitt2018	i9_Gaba	c(W = 146526)	0.116241	-3.45429e-05	Wilcoxon rank sum test with continuity correction	greater
mousebrain	ABC	c(W = 158347)	0.687538	-8.70506e-06	Wilcoxon rank sum test with continuity correction	greater
mousebrain	ACBG	c(W = 144172.5)	0.941787	-7.46359e-05	Wilcoxon rank sum test with continuity correction	greater
mousebrain	ACMB	c(W = 156080)	0.730105	-3.16886e-05	Wilcoxon rank sum test with continuity correction	greater
mousebrain	ACNT1	c(W = 146076)	0.888756	-2.15894e-06	Wilcoxon rank sum test with continuity correction	greater
mousebrain	ACNT2	c(W = 166354)	0.478742	-1.51947e-05	Wilcoxon rank sum test with continuity correction	greater
mousebrain	ACOB	c(W = 158529)	0.680344	-4.1879e-05	Wilcoxon rank sum test with continuity correction	greater
mousebrain	ACTE1	c(W = 161362)	0.611827	-3.43489e-06	Wilcoxon rank sum test with continuity correction	greater
mousebrain	ACTE2	c(W = 144100)	0.920437	-1.86449e-05	Wilcoxon rank sum test with continuity correction	greater
mousebrain	CBGRC	c(W = 152071)	0.844215	-1.8283e-05	Wilcoxon rank sum test with continuity correction	greater
mousebrain	CBINH1	c(W = 147929.5)	0.919336	-5.77482e-05	Wilcoxon rank sum test with continuity correction	greater
mousebrain	CBINH2	c(W = 163738)	0.566929	-3.96944e-05	Wilcoxon rank sum test with continuity correction	greater
mousebrain	CBNBL1	c(W = 188351)	0.0228104	6.80052e-05	Wilcoxon rank sum test with continuity correction	greater
mousebrain	CBNBL2	c(W = 153785.5)	0.854215	-7.83404e-06	Wilcoxon rank sum test with continuity correction	greater
mousebrain	CBPC	c(W = 170369.5)	0.326463	-2.43888e-05	Wilcoxon rank sum test with continuity correction	greater
mousebrain	CHOR	c(W = 143652)	0.908891	-2.69045e-05	Wilcoxon rank sum test with continuity correction	greater
mousebrain	COP1	c(W = 129268.5)	0.988174	-3.95253e-05	Wilcoxon rank sum test with continuity correction	greater
mousebrain	COP2	c(W = 162724)	0.579009	-1.09407e-05	Wilcoxon rank sum test with continuity correction	greater
mousebrain	CR	c(W = 157296)	0.747315	-6.87088e-05	Wilcoxon rank sum test with continuity correction	greater
mousebrain	DECHO1	c(W = 183356)	0.16421	-1.66006e-05	Wilcoxon rank sum test with continuity correction	greater
mousebrain	DECHO2	c(W = 168620)	0.418447	-4.77942e-05	Wilcoxon rank sum test with continuity correction	greater
mousebrain	DEGLU1	c(W = 188477)	0.113657	-5.05405e-05	Wilcoxon rank sum test with continuity correction	greater
mousebrain	DEGLU2	c(W = 186495)	0.130815	-6.33457e-05	Wilcoxon rank sum test with continuity correction	greater
mousebrain	DEGLU3	c(W = 193700)	0.0655829	-3.24629e-05	Wilcoxon rank sum test with continuity correction	greater
mousebrain	DEGLU4	c(W = 189117)	0.0723802	-1.43799e-05	Wilcoxon rank sum test with continuity correction	greater
mousebrain	DEGLU5	c(W = 229563.5)	0.000117786	0.000376914	Wilcoxon rank sum test with continuity correction	greater
mousebrain	DEINH1	c(W = 191705)	0.0615895	-2.9533e-05	Wilcoxon rank sum test with continuity correction	greater
mousebrain	DEINH2	c(W = 190520.5)	0.0602842	-7.1968e-05	Wilcoxon rank sum test with continuity correction	greater
mousebrain	DEINH3	c(W = 215938)	0.00238391	5.21316e-05	Wilcoxon rank sum test with continuity correction	greater
mousebrain	DEINH4	c(W = 193797)	0.0267167	5.61193e-05	Wilcoxon rank sum test with continuity correction	greater
mousebrain	DEINH5	c(W = 219325)	0.000406998	2.12647e-05	Wilcoxon rank sum test with continuity correction	greater
mousebrain	DEINH6	c(W = 178076)	0.121697	-4.1484e-05	Wilcoxon rank sum test with continuity correction	greater
mousebrain	DEINH7	c(W = 164884)	0.52482	-3.9344e-05	Wilcoxon rank sum test with continuity correction	greater
mousebrain	DEINH8	c(W = 179894)	0.0934401	-3.92082e-05	Wilcoxon rank sum test with continuity correction	greater
mousebrain	DETPH	c(W = 158600)	0.754835	-7.90137e-05	Wilcoxon rank sum test with continuity correction	greater
mousebrain	DGGRC1	c(W = 161156)	0.609525	-6.03202e-05	Wilcoxon rank sum test with continuity correction	greater
mousebrain	DGGRC2	c(W = 151708)	0.801182	-6.69594e-05	Wilcoxon rank sum test with continuity correction	greater
mousebrain	DGNBL1	c(W = 139161)	0.978903	0	Wilcoxon rank sum test with continuity correction	greater
mousebrain	DGNBL2	c(W = 152748)	0.80784	-2.30447e-05	Wilcoxon rank sum test with continuity correction	greater
mousebrain	ENMFB	c(W = 146632)	0.906575	-5.13354e-05	Wilcoxon rank sum test with continuity correction	greater
mousebrain	ENT1	c(W = 163325)	0.56037	-6.45194e-05	Wilcoxon rank sum test with continuity correction	greater
mousebrain	ENT2	c(W = 153251.5)	0.745934	-7.10147e-05	Wilcoxon rank sum test with continuity correction	greater
mousebrain	ENT3	c(W = 139713)	0.928473	-5.8384e-05	Wilcoxon rank sum test with continuity correction	greater
mousebrain	ENT4	c(W = 130417)	0.978372	-5.33723e-05	Wilcoxon rank sum test with continuity correction	greater
mousebrain	ENT5	c(W = 159237.5)	0.65277	-5.81207e-05	Wilcoxon rank sum test with continuity correction	greater
mousebrain	ENT6	c(W = 167487)	0.453752	-2.50575e-05	Wilcoxon rank sum test with continuity correction	greater
mousebrain	ENT7	c(W = 164697.5)	0.521403	-8.33988e-06	Wilcoxon rank sum test with continuity correction	greater
mousebrain	ENT8	c(W = 186418)	0.122583	-6.06652e-05	Wilcoxon rank sum test with continuity correction	greater
mousebrain	ENT9	c(W = 155870.5)	0.70026	-1.25376e-05	Wilcoxon rank sum test with continuity correction	greater
mousebrain	ENTG1	c(W = 134089)	0.967261	-4.60432e-05	Wilcoxon rank sum test with continuity correction	greater
mousebrain	ENTG2	c(W = 138420.5)	0.950982	-4.07006e-05	Wilcoxon rank sum test with continuity correction	greater
mousebrain	ENTG3	c(W = 130957)	0.981558	-2.82433e-05	Wilcoxon rank sum test with continuity correction	greater
mousebrain	ENTG4	c(W = 133475)	0.969142	-4.77008e-06	Wilcoxon rank sum test with continuity correction	greater
mousebrain	ENTG5	c(W = 133597)	0.974921	-3.33307e-05	Wilcoxon rank sum test with continuity correction	greater
mousebrain	ENTG6	c(W = 141434)	0.93285	-8.79307e-05	Wilcoxon rank sum test with continuity correction	greater
mousebrain	ENTG7	c(W = 142748)	0.911581	-4.73385e-05	Wilcoxon rank sum test with continuity correction	greater
mousebrain	EPEN	c(W = 151870)	0.774722	-1.1254e-07	Wilcoxon rank sum test with continuity correction	greater
mousebrain	EPMB	c(W = 170049)	0.358491	-5.15427e-05	Wilcoxon rank sum test with continuity correction	greater
mousebrain	EPSC	c(W = 159150.5)	0.658405	-5.50439e-05	Wilcoxon rank sum test with continuity correction	greater
mousebrain	HBADR	c(W = 204122)	0.00694274	2.86293e-05	Wilcoxon rank sum test with continuity correction	greater
mousebrain	HBCHO1	c(W = 169452)	0.393951	-3.36369e-05	Wilcoxon rank sum test with continuity correction	greater
mousebrain	HBCHO2	c(W = 197359.5)	0.0349124	4.41428e-05	Wilcoxon rank sum test with continuity correction	greater
mousebrain	HBCHO3	c(W = 206961)	0.0141559	8.88614e-05	Wilcoxon rank sum test with continuity correction	greater
mousebrain	HBCHO4	c(W = 212910)	0.00273689	2.31573e-08	Wilcoxon rank sum test with continuity correction	greater
mousebrain	HBGLU1	c(W = 192191)	0.0555398	-8.5669e-05	Wilcoxon rank sum test with continuity correction	greater
mousebrain	HBGLU10	c(W = 152553)	0.833967	-1.90519e-05	Wilcoxon rank sum test with continuity correction	greater
mousebrain	HBGLU2	c(W = 227081.5)	0.000286961	4.19282e-06	Wilcoxon rank sum test with continuity correction	greater
mousebrain	HBGLU3	c(W = 209077)	0.003674	3.34393e-05	Wilcoxon rank sum test with continuity correction	greater
mousebrain	HBGLU4	c(W = 195243.5)	0.0218165	6.96439e-05	Wilcoxon rank sum test with continuity correction	greater
mousebrain	HBGLU5	c(W = 201569)	0.0217102	5.77005e-06	Wilcoxon rank sum test with continuity correction	greater
mousebrain	HBGLU6	c(W = 203052.5)	0.0219657	1.0877e-05	Wilcoxon rank sum test with continuity correction	greater
mousebrain	HBGLU7	c(W = 207858.5)	0.0106953	6.77145e-05	Wilcoxon rank sum test with continuity correction	greater
mousebrain	HBGLU8	c(W = 183254)	0.144446	-4.40261e-05	Wilcoxon rank sum test with continuity correction	greater
mousebrain	HBGLU9	c(W = 193928.5)	0.0498195	8.65431e-05	Wilcoxon rank sum test with continuity correction	greater
mousebrain	HBINH1	c(W = 163687)	0.568607	-4.47889e-05	Wilcoxon rank sum test with continuity correction	greater
mousebrain	HBINH2	c(W = 205514.5)	0.00975112	3.9776e-05	Wilcoxon rank sum test with continuity correction	greater
mousebrain	HBINH3	c(W = 210114)	0.00107174	4.49921e-05	Wilcoxon rank sum test with continuity correction	greater
mousebrain	HBINH4	c(W = 171536)	0.346434	-2.06855e-06	Wilcoxon rank sum test with continuity correction	greater
mousebrain	HBINH5	c(W = 211915)	0.00695466	3.67444e-05	Wilcoxon rank sum test with continuity correction	greater
mousebrain	HBINH6	c(W = 179470)	0.207756	-1.32811e-05	Wilcoxon rank sum test with continuity correction	greater
mousebrain	HBINH7	c(W = 172698)	0.31554	-1.55402e-05	Wilcoxon rank sum test with continuity correction	greater
mousebrain	HBINH8	c(W = 173742)	0.278349	-5.00374e-05	Wilcoxon rank sum test with continuity correction	greater
mousebrain	HBINH9	c(W = 200033)	0.0126338	2.78519e-05	Wilcoxon rank sum test with continuity correction	greater
mousebrain	HBNOR	c(W = 205871.5)	0.00223531	2.89511e-05	Wilcoxon rank sum test with continuity correction	greater
mousebrain	HBSER1	c(W = 205647)	0.0100873	7.71516e-05	Wilcoxon rank sum test with continuity correction	greater
mousebrain	HBSER2	c(W = 202201.5)	0.0217533	3.48952e-05	Wilcoxon rank sum test with continuity correction	greater
mousebrain	HBSER3	c(W = 210002)	0.00409184	3.70616e-05	Wilcoxon rank sum test with continuity correction	greater
mousebrain	HBSER4	c(W = 245358)	4.93694e-06	0.0699352	Wilcoxon rank sum test with continuity correction	greater
mousebrain	HBSER5	c(W = 201442)	0.0223486	2.75415e-05	Wilcoxon rank sum test with continuity correction	greater
mousebrain	HYPEN	c(W = 143137.5)	0.951196	-1.20613e-05	Wilcoxon rank sum test with continuity correction	greater
mousebrain	HYPEP1	c(W = 215784)	0.000617875	7.71962e-05	Wilcoxon rank sum test with continuity correction	greater
mousebrain	HYPEP2	c(W = 195447.5)	0.00757742	5.79609e-05	Wilcoxon rank sum test with continuity correction	greater
mousebrain	HYPEP3	c(W = 223242)	0.000104352	1.78217e-05	Wilcoxon rank sum test with continuity correction	greater
mousebrain	HYPEP4	c(W = 199983)	0.00415113	2.20537e-05	Wilcoxon rank sum test with continuity correction	greater
mousebrain	HYPEP5	c(W = 205090)	0.00213619	7.19587e-06	Wilcoxon rank sum test with continuity correction	greater
mousebrain	HYPEP6	c(W = 193153)	0.0281243	4.84861e-05	Wilcoxon rank sum test with continuity correction	greater
mousebrain	HYPEP7	c(W = 178465)	0.118885	-1.31918e-05	Wilcoxon rank sum test with continuity correction	greater
mousebrain	HYPEP8	c(W = 177774)	0.130508	-1.75714e-05	Wilcoxon rank sum test with continuity correction	greater
mousebrain	MBCHO1	c(W = 188246.5)	0.0824907	-7.48791e-06	Wilcoxon rank sum test with continuity correction	greater
mousebrain	MBDOP1	c(W = 230303.5)	1.02437e-07	5.89352e-05	Wilcoxon rank sum test with continuity correction	greater
mousebrain	MBDOP2	c(W = 226171)	4.00032e-05	1.75797e-05	Wilcoxon rank sum test with continuity correction	greater
mousebrain	MEGLU1	c(W = 227869)	0.000281378	0.000268322	Wilcoxon rank sum test with continuity correction	greater
mousebrain	MEGLU10	c(W = 188457.5)	0.0981085	-4.53042e-05	Wilcoxon rank sum test with continuity correction	greater
mousebrain	MEGLU11	c(W = 196050.5)	0.0423804	5.79266e-06	Wilcoxon rank sum test with continuity correction	greater
mousebrain	MEGLU14	c(W = 231604)	6.74947e-06	4.71354e-05	Wilcoxon rank sum test with continuity correction	greater
mousebrain	MEGLU2	c(W = 237284)	2.75447e-05	0.00707308	Wilcoxon rank sum test with continuity correction	greater
mousebrain	MEGLU3	c(W = 202160)	0.0112726	3.713e-05	Wilcoxon rank sum test with continuity correction	greater
mousebrain	MEGLU4	c(W = 185521)	0.104137	-2.05221e-05	Wilcoxon rank sum test with continuity correction	greater
mousebrain	MEGLU5	c(W = 156987)	0.689437	-7.42703e-05	Wilcoxon rank sum test with continuity correction	greater
mousebrain	MEGLU6	c(W = 202464)	0.0193642	9.2749e-05	Wilcoxon rank sum test with continuity correction	greater
mousebrain	MEGLU7	c(W = 168352)	0.429152	-4.55117e-05	Wilcoxon rank sum test with continuity correction	greater
mousebrain	MEGLU8	c(W = 189978)	0.0697158	-5.81409e-05	Wilcoxon rank sum test with continuity correction	greater
mousebrain	MEGLU9	c(W = 187324.5)	0.0973629	-2.12425e-05	Wilcoxon rank sum test with continuity correction	greater
mousebrain	MEINH1	c(W = 150359)	0.931616	0	Wilcoxon rank sum test with continuity correction	greater
mousebrain	MEINH10	c(W = 183113.5)	0.167595	-7.19375e-06	Wilcoxon rank sum test with continuity correction	greater
mousebrain	MEINH11	c(W = 188037.5)	0.0467528	6.38988e-05	Wilcoxon rank sum test with continuity correction	greater
mousebrain	MEINH12	c(W = 192548)	0.0252495	2.29645e-06	Wilcoxon rank sum test with continuity correction	greater
mousebrain	MEINH13	c(W = 223772)	0.000154843	4.52772e-05	Wilcoxon rank sum test with continuity correction	greater
mousebrain	MEINH14	c(W = 179533)	0.098664	-8.11181e-05	Wilcoxon rank sum test with continuity correction	greater
mousebrain	MEINH2	c(W = 213644)	0.00434971	1.9291e-05	Wilcoxon rank sum test with continuity correction	greater
mousebrain	MEINH3	c(W = 195482)	0.0470099	5.4364e-05	Wilcoxon rank sum test with continuity correction	greater
mousebrain	MEINH4	c(W = 201507.5)	0.0155547	1.14081e-05	Wilcoxon rank sum test with continuity correction	greater
mousebrain	MEINH5	c(W = 171413)	0.352143	-1.02438e-05	Wilcoxon rank sum test with continuity correction	greater
mousebrain	MEINH6	c(W = 158943)	0.670707	-5.53953e-05	Wilcoxon rank sum test with continuity correction	greater
mousebrain	MEINH7	c(W = 171689.5)	0.33216	-2.335e-05	Wilcoxon rank sum test with continuity correction	greater
mousebrain	MEINH8	c(W = 168549)	0.407085	-2.6729e-05	Wilcoxon rank sum test with continuity correction	greater
mousebrain	MEINH9	c(W = 191748)	0.0548798	-7.53322e-05	Wilcoxon rank sum test with continuity correction	greater
mousebrain	MFOL1	c(W = 157041)	0.698116	-2.65814e-06	Wilcoxon rank sum test with continuity correction	greater
mousebrain	MFOL2	c(W = 165211)	0.508257	-1.86196e-05	Wilcoxon rank sum test with continuity correction	greater
mousebrain	MGL1	c(W = 138932.5)	0.966595	-7.88552e-05	Wilcoxon rank sum test with continuity correction	greater
mousebrain	MGL2	c(W = 146647)	0.904114	-1.2883e-05	Wilcoxon rank sum test with continuity correction	greater
mousebrain	MGL3	c(W = 146775)	0.9026	-4.77546e-05	Wilcoxon rank sum test with continuity correction	greater
mousebrain	MOL1	c(W = 158796)	0.671894	-5.0058e-05	Wilcoxon rank sum test with continuity correction	greater
mousebrain	MOL2	c(W = 153834)	0.771459	-4.10708e-05	Wilcoxon rank sum test with continuity correction	greater
mousebrain	MOL3	c(W = 143711)	0.915642	-5.85391e-06	Wilcoxon rank sum test with continuity correction	greater
mousebrain	MSN1	c(W = 182594)	0.165046	-7.44023e-05	Wilcoxon rank sum test with continuity correction	greater
mousebrain	MSN2	c(W = 182042)	0.164502	-2.97965e-05	Wilcoxon rank sum test with continuity correction	greater
mousebrain	MSN3	c(W = 182620)	0.151687	-2.43452e-05	Wilcoxon rank sum test with continuity correction	greater
mousebrain	MSN4	c(W = 189945)	0.078227	-5.63422e-05	Wilcoxon rank sum test with continuity correction	greater
mousebrain	MSN5	c(W = 167915.5)	0.436232	-8.30644e-05	Wilcoxon rank sum test with continuity correction	greater
mousebrain	MSN6	c(W = 174463)	0.229031	-8.62853e-05	Wilcoxon rank sum test with continuity correction	greater
mousebrain	NFOL1	c(W = 137602)	0.959372	-4.61481e-05	Wilcoxon rank sum test with continuity correction	greater
mousebrain	NFOL2	c(W = 162654)	0.580418	-5.60019e-05	Wilcoxon rank sum test with continuity correction	greater
mousebrain	OBDOP1	c(W = 187069)	0.0543038	-1.77609e-05	Wilcoxon rank sum test with continuity correction	greater
mousebrain	OBDOP2	c(W = 172063)	0.296797	-1.95038e-05	Wilcoxon rank sum test with continuity correction	greater
mousebrain	OBINH1	c(W = 148729.5)	0.905713	-1.6566e-05	Wilcoxon rank sum test with continuity correction	greater
mousebrain	OBINH2	c(W = 167828)	0.437569	-5.87096e-05	Wilcoxon rank sum test with continuity correction	greater
mousebrain	OBINH3	c(W = 147863)	0.91368	-3.38616e-05	Wilcoxon rank sum test with continuity correction	greater
mousebrain	OBINH4	c(W = 167397.5)	0.439249	-1.39812e-05	Wilcoxon rank sum test with continuity correction	greater
mousebrain	OBINH5	c(W = 158657)	0.718184	-1.10393e-05	Wilcoxon rank sum test with continuity correction	greater
mousebrain	OBNBL1	c(W = 179041)	0.186799	-3.27992e-05	Wilcoxon rank sum test with continuity correction	greater
mousebrain	OBNBL2	c(W = 174224.5)	0.269453	-4.68886e-05	Wilcoxon rank sum test with continuity correction	greater
mousebrain	OBNBL3	c(W = 149447)	0.871292	-1.15666e-05	Wilcoxon rank sum test with continuity correction	greater
mousebrain	OBNBL4	c(W = 164481)	0.540344	-1.09197e-05	Wilcoxon rank sum test with continuity correction	greater
mousebrain	OBNBL5	c(W = 172679)	0.281078	-7.83007e-05	Wilcoxon rank sum test with continuity correction	greater
mousebrain	OEC	c(W = 135183)	0.978391	-3.07118e-05	Wilcoxon rank sum test with continuity correction	greater
mousebrain	OPC	c(W = 150866)	0.818006	-5.55501e-05	Wilcoxon rank sum test with continuity correction	greater
mousebrain	PER1	c(W = 156927)	0.690217	-2.25669e-05	Wilcoxon rank sum test with continuity correction	greater
mousebrain	PER2	c(W = 150354.5)	0.814777	-4.38119e-05	Wilcoxon rank sum test with continuity correction	greater
mousebrain	PER3	c(W = 170933)	0.337009	-3.19381e-05	Wilcoxon rank sum test with continuity correction	greater
mousebrain	PSNF1	c(W = 190486.5)	0.0635394	-1.34945e-06	Wilcoxon rank sum test with continuity correction	greater
mousebrain	PSNF2	c(W = 192268)	0.050616	-2.53018e-05	Wilcoxon rank sum test with continuity correction	greater
mousebrain	PSNF3	c(W = 188454)	0.0789411	-2.5349e-05	Wilcoxon rank sum test with continuity correction	greater
mousebrain	PSNP1	c(W = 150046)	0.801902	-3.57186e-05	Wilcoxon rank sum test with continuity correction	greater
mousebrain	PSNP2	c(W = 166259)	0.483157	-4.97857e-06	Wilcoxon rank sum test with continuity correction	greater
mousebrain	PSNP3	c(W = 157214)	0.674321	-2.17934e-05	Wilcoxon rank sum test with continuity correction	greater
mousebrain	PSNP4	c(W = 172093)	0.346396	-2.93792e-05	Wilcoxon rank sum test with continuity correction	greater
mousebrain	PSNP5	c(W = 163890)	0.537633	-4.66647e-05	Wilcoxon rank sum test with continuity correction	greater
mousebrain	PSNP6	c(W = 161207)	0.59222	-6.08694e-05	Wilcoxon rank sum test with continuity correction	greater
mousebrain	PSPEP1	c(W = 174954)	0.286608	-5.09246e-05	Wilcoxon rank sum test with continuity correction	greater
mousebrain	PSPEP2	c(W = 165791)	0.494316	-5.48185e-05	Wilcoxon rank sum test with continuity correction	greater
mousebrain	PSPEP3	c(W = 161787.5)	0.586745	-6.40191e-05	Wilcoxon rank sum test with continuity correction	greater
mousebrain	PSPEP4	c(W = 163271)	0.553873	-5.11859e-05	Wilcoxon rank sum test with continuity correction	greater
mousebrain	PSPEP5	c(W = 163241)	0.563123	-4.50686e-05	Wilcoxon rank sum test with continuity correction	greater
mousebrain	PSPEP6	c(W = 153418)	0.794487	-1.57961e-06	Wilcoxon rank sum test with continuity correction	greater
mousebrain	PSPEP7	c(W = 150811)	0.838158	-5.2654e-05	Wilcoxon rank sum test with continuity correction	greater
mousebrain	PSPEP8	c(W = 181416)	0.153119	-1.36301e-06	Wilcoxon rank sum test with continuity correction	greater
mousebrain	PVM1	c(W = 136819)	0.974039	-1.70483e-05	Wilcoxon rank sum test with continuity correction	greater
mousebrain	PVM2	c(W = 141114.5)	0.959851	-2.36787e-05	Wilcoxon rank sum test with continuity correction	greater
mousebrain	RGDG	c(W = 149238)	0.902648	-1.00165e-06	Wilcoxon rank sum test with continuity correction	greater
mousebrain	RGSZ	c(W = 159409.5)	0.674037	-1.69398e-05	Wilcoxon rank sum test with continuity correction	greater
mousebrain	SATG1	c(W = 147348)	0.921755	-1.15114e-05	Wilcoxon rank sum test with continuity correction	greater
mousebrain	SATG2	c(W = 140592)	0.946632	-1.77347e-06	Wilcoxon rank sum test with continuity correction	greater
mousebrain	SCGLU1	c(W = 199398.5)	0.00233446	1.54727e-06	Wilcoxon rank sum test with continuity correction	greater
mousebrain	SCGLU10	c(W = 176366)	0.177501	-1.1787e-05	Wilcoxon rank sum test with continuity correction	greater
mousebrain	SCGLU2	c(W = 173600.5)	0.280968	-3.53894e-05	Wilcoxon rank sum test with continuity correction	greater
mousebrain	SCGLU3	c(W = 182952)	0.104072	-7.37299e-05	Wilcoxon rank sum test with continuity correction	greater
mousebrain	SCGLU4	c(W = 190111)	0.0473864	7.33331e-05	Wilcoxon rank sum test with continuity correction	greater
mousebrain	SCGLU5	c(W = 188795)	0.0542879	-6.4479e-05	Wilcoxon rank sum test with continuity correction	greater
mousebrain	SCGLU6	c(W = 179751.5)	0.12807	-1.03741e-05	Wilcoxon rank sum test with continuity correction	greater
mousebrain	SCGLU7	c(W = 165913)	0.485147	-5.56446e-05	Wilcoxon rank sum test with continuity correction	greater
mousebrain	SCGLU8	c(W = 162733)	0.601429	-4.45714e-05	Wilcoxon rank sum test with continuity correction	greater
mousebrain	SCGLU9	c(W = 167326)	0.441387	-6.07644e-05	Wilcoxon rank sum test with continuity correction	greater
mousebrain	SCHW	c(W = 151100.5)	0.885265	-4.85458e-05	Wilcoxon rank sum test with continuity correction	greater
mousebrain	SCINH1	c(W = 177578.5)	0.174577	-8.93765e-06	Wilcoxon rank sum test with continuity correction	greater
mousebrain	SCINH10	c(W = 176508.5)	0.198245	-1.54642e-05	Wilcoxon rank sum test with continuity correction	greater
mousebrain	SCINH11	c(W = 157880)	0.734569	-1.88505e-05	Wilcoxon rank sum test with continuity correction	greater
mousebrain	SCINH2	c(W = 198243)	0.0123147	1.99194e-06	Wilcoxon rank sum test with continuity correction	greater
mousebrain	SCINH3	c(W = 183012)	0.103388	-2.93028e-05	Wilcoxon rank sum test with continuity correction	greater
mousebrain	SCINH4	c(W = 179860)	0.119785	-7.93442e-05	Wilcoxon rank sum test with continuity correction	greater
mousebrain	SCINH5	c(W = 181560)	0.141686	-3.97154e-05	Wilcoxon rank sum test with continuity correction	greater
mousebrain	SCINH6	c(W = 142517)	0.933191	-4.40279e-05	Wilcoxon rank sum test with continuity correction	greater
mousebrain	SCINH7	c(W = 164862.5)	0.521859	-1.78993e-05	Wilcoxon rank sum test with continuity correction	greater
mousebrain	SCINH8	c(W = 174177.5)	0.256556	-4.83193e-05	Wilcoxon rank sum test with continuity correction	greater
mousebrain	SCINH9	c(W = 182162)	0.0836738	-4.09663e-05	Wilcoxon rank sum test with continuity correction	greater
mousebrain	SEPNBL	c(W = 182797)	0.0782896	-4.2765e-05	Wilcoxon rank sum test with continuity correction	greater
mousebrain	SYCHO1	c(W = 156764)	0.711814	-1.75107e-05	Wilcoxon rank sum test with continuity correction	greater
mousebrain	SYCHO2	c(W = 163742)	0.541588	-2.79274e-05	Wilcoxon rank sum test with continuity correction	greater
mousebrain	SYNOR1	c(W = 151715.5)	0.790618	-1.81641e-05	Wilcoxon rank sum test with continuity correction	greater
mousebrain	SYNOR2	c(W = 148121)	0.848357	-4.43568e-05	Wilcoxon rank sum test with continuity correction	greater
mousebrain	SYNOR3	c(W = 143469)	0.884477	-4.35175e-05	Wilcoxon rank sum test with continuity correction	greater
mousebrain	SYNOR4	c(W = 150144)	0.804123	-2.08763e-05	Wilcoxon rank sum test with continuity correction	greater
mousebrain	SYNOR5	c(W = 159650)	0.654167	-6.85988e-05	Wilcoxon rank sum test with continuity correction	greater
mousebrain	SZNBL	c(W = 131299)	0.986984	-1.56164e-05	Wilcoxon rank sum test with continuity correction	greater
mousebrain	TECHO	c(W = 167759.5)	0.447158	-3.23057e-05	Wilcoxon rank sum test with continuity correction	greater
mousebrain	TEGLU1	c(W = 192192)	0.0526385	-2.3606e-05	Wilcoxon rank sum test with continuity correction	greater
mousebrain	TEGLU10	c(W = 192527)	0.0788808	-2.60342e-05	Wilcoxon rank sum test with continuity correction	greater
mousebrain	TEGLU11	c(W = 178192)	0.253193	-1.6197e-05	Wilcoxon rank sum test with continuity correction	greater
mousebrain	TEGLU12	c(W = 182066)	0.167902	-3.98011e-05	Wilcoxon rank sum test with continuity correction	greater
mousebrain	TEGLU13	c(W = 166990)	0.467392	-3.4027e-05	Wilcoxon rank sum test with continuity correction	greater
mousebrain	TEGLU14	c(W = 200413)	0.0173186	2.15768e-05	Wilcoxon rank sum test with continuity correction	greater
mousebrain	TEGLU15	c(W = 191794)	0.0757441	-1.99441e-05	Wilcoxon rank sum test with continuity correction	greater
mousebrain	TEGLU16	c(W = 169908)	0.397275	-2.53078e-05	Wilcoxon rank sum test with continuity correction	greater
mousebrain	TEGLU17	c(W = 186918.5)	0.128932	-1.96336e-05	Wilcoxon rank sum test with continuity correction	greater
mousebrain	TEGLU18	c(W = 194701)	0.0601895	-2.70947e-05	Wilcoxon rank sum test with continuity correction	greater
mousebrain	TEGLU19	c(W = 181438)	0.172054	-5.64242e-05	Wilcoxon rank sum test with continuity correction	greater
mousebrain	TEGLU2	c(W = 180509.5)	0.202641	-7.61212e-05	Wilcoxon rank sum test with continuity correction	greater
mousebrain	TEGLU20	c(W = 194461)	0.0418438	5.79783e-05	Wilcoxon rank sum test with continuity correction	greater
mousebrain	TEGLU21	c(W = 194110.5)	0.0514867	-6.63779e-05	Wilcoxon rank sum test with continuity correction	greater
mousebrain	TEGLU22	c(W = 199556.5)	0.0298334	5.51815e-05	Wilcoxon rank sum test with continuity correction	greater
mousebrain	TEGLU23	c(W = 180596)	0.212763	-4.3051e-05	Wilcoxon rank sum test with continuity correction	greater
mousebrain	TEGLU24	c(W = 174649)	0.312892	-5.6566e-05	Wilcoxon rank sum test with continuity correction	greater
mousebrain	TEGLU3	c(W = 155557)	0.705183	-3.16608e-06	Wilcoxon rank sum test with continuity correction	greater
mousebrain	TEGLU4	c(W = 211400)	0.00703877	3.944e-05	Wilcoxon rank sum test with continuity correction	greater
mousebrain	TEGLU5	c(W = 174281)	0.306759	-5.47316e-05	Wilcoxon rank sum test with continuity correction	greater
mousebrain	TEGLU6	c(W = 182280)	0.154739	-1.60074e-05	Wilcoxon rank sum test with continuity correction	greater
mousebrain	TEGLU7	c(W = 167870)	0.452137	-1.08649e-05	Wilcoxon rank sum test with continuity correction	greater
mousebrain	TEGLU8	c(W = 177634)	0.264603	-4.14338e-05	Wilcoxon rank sum test with continuity correction	greater
mousebrain	TEGLU9	c(W = 172090.5)	0.35212	-6.58092e-05	Wilcoxon rank sum test with continuity correction	greater
mousebrain	TEINH1	c(W = 215057)	0.00301713	5.69615e-05	Wilcoxon rank sum test with continuity correction	greater
mousebrain	TEINH10	c(W = 180702.5)	0.189858	-9.07447e-06	Wilcoxon rank sum test with continuity correction	greater
mousebrain	TEINH11	c(W = 181636.5)	0.198035	-8.13293e-06	Wilcoxon rank sum test with continuity correction	greater
mousebrain	TEINH12	c(W = 161810)	0.58008	-1.38667e-06	Wilcoxon rank sum test with continuity correction	greater
mousebrain	TEINH13	c(W = 176656)	0.266055	-2.44939e-05	Wilcoxon rank sum test with continuity correction	greater
mousebrain	TEINH14	c(W = 179123)	0.199439	-7.10449e-05	Wilcoxon rank sum test with continuity correction	greater
mousebrain	TEINH15	c(W = 179549.5)	0.211098	-7.34657e-05	Wilcoxon rank sum test with continuity correction	greater
mousebrain	TEINH16	c(W = 177353.5)	0.253209	-4.79869e-05	Wilcoxon rank sum test with continuity correction	greater
mousebrain	TEINH17	c(W = 186046.5)	0.114076	-3.2893e-05	Wilcoxon rank sum test with continuity correction	greater
mousebrain	TEINH18	c(W = 200062)	0.0271993	2.22566e-05	Wilcoxon rank sum test with continuity correction	greater
mousebrain	TEINH19	c(W = 186059)	0.137034	-1.91042e-05	Wilcoxon rank sum test with continuity correction	greater
mousebrain	TEINH2	c(W = 207877)	0.00816307	2.06831e-05	Wilcoxon rank sum test with continuity correction	greater
mousebrain	TEINH20	c(W = 187288)	0.105467	-2.30326e-06	Wilcoxon rank sum test with continuity correction	greater
mousebrain	TEINH21	c(W = 182090)	0.148879	-4.2863e-05	Wilcoxon rank sum test with continuity correction	greater
mousebrain	TEINH3	c(W = 200534)	0.0119379	3.50469e-05	Wilcoxon rank sum test with continuity correction	greater
mousebrain	TEINH4	c(W = 189419)	0.0561617	-2.60822e-05	Wilcoxon rank sum test with continuity correction	greater
mousebrain	TEINH5	c(W = 189324)	0.0603901	-1.9969e-05	Wilcoxon rank sum test with continuity correction	greater
mousebrain	TEINH6	c(W = 171991.5)	0.320252	-1.32569e-05	Wilcoxon rank sum test with continuity correction	greater
mousebrain	TEINH7	c(W = 171476)	0.336805	-4.33423e-05	Wilcoxon rank sum test with continuity correction	greater
mousebrain	TEINH8	c(W = 178141)	0.165554	-4.74976e-05	Wilcoxon rank sum test with continuity correction	greater
mousebrain	TEINH9	c(W = 184260)	0.116619	-3.71907e-05	Wilcoxon rank sum test with continuity correction	greater
mousebrain	VECA	c(W = 141153)	0.944733	-4.03179e-06	Wilcoxon rank sum test with continuity correction	greater
mousebrain	VECC	c(W = 154051)	0.76815	-3.4012e-05	Wilcoxon rank sum test with continuity correction	greater
mousebrain	VECV	c(W = 151133)	0.809074	-1.91927e-05	Wilcoxon rank sum test with continuity correction	greater
mousebrain	VLMC1	c(W = 155707)	0.761382	-2.74747e-05	Wilcoxon rank sum test with continuity correction	greater
mousebrain	VLMC2	c(W = 163719.5)	0.548441	-8.31224e-05	Wilcoxon rank sum test with continuity correction	greater
mousebrain	VSMCA	c(W = 148820)	0.881202	-4.20362e-05	Wilcoxon rank sum test with continuity correction	greater
romanov2017	Adcyap1_1_Tac1	c(W = 54941)	0.0607104	-3.23329e-05	Wilcoxon rank sum test with continuity correction	greater
romanov2017	Adcyap1_2	c(W = 58007)	0.0259138	2.2034e-06	Wilcoxon rank sum test with continuity correction	greater
romanov2017	Avp_1_high	c(W = 47881)	0.383794	-4.8262e-05	Wilcoxon rank sum test with continuity correction	greater
romanov2017	Avp_2_high	c(W = 55278)	0.0387581	2.99148e-05	Wilcoxon rank sum test with continuity correction	greater
romanov2017	Avp_3_medium	c(W = 58904)	0.00476027	3.03215e-05	Wilcoxon rank sum test with continuity correction	greater
romanov2017	Dopamine_1	c(W = 56789)	0.0376972	6.43649e-05	Wilcoxon rank sum test with continuity correction	greater
romanov2017	Dopamine_2_low_VMAT2	c(W = 54550)	0.0436064	7.09915e-05	Wilcoxon rank sum test with continuity correction	greater
romanov2017	Dopamine_3	c(W = 56068)	0.059579	-5.85539e-05	Wilcoxon rank sum test with continuity correction	greater
romanov2017	Dopamine_4	c(W = 39325)	0.912468	-6.99978e-06	Wilcoxon rank sum test with continuity correction	greater
romanov2017	GABA1	c(W = 53293)	0.116907	-4.68689e-05	Wilcoxon rank sum test with continuity correction	greater
romanov2017	GABA_10	c(W = 45649)	0.549474	-8.14057e-06	Wilcoxon rank sum test with continuity correction	greater
romanov2017	GABA_11_Nts_1	c(W = 48887)	0.348055	-5.44288e-05	Wilcoxon rank sum test with continuity correction	greater
romanov2017	GABA_12_Nts_2	c(W = 54586)	0.0964239	-7.85943e-06	Wilcoxon rank sum test with continuity correction	greater
romanov2017	GABA_13_Galanin	c(W = 47817)	0.405495	-4.56174e-05	Wilcoxon rank sum test with continuity correction	greater
romanov2017	GABA_14_Npy_Agrp	c(W = 49128)	0.300443	-1.51641e-05	Wilcoxon rank sum test with continuity correction	greater
romanov2017	GABA_15_Npynegmedium	c(W = 47120.5)	0.441229	-4.0324e-05	Wilcoxon rank sum test with continuity correction	greater
romanov2017	GABA_2_Gucy1a3	c(W = 49019)	0.324426	-1.26157e-05	Wilcoxon rank sum test with continuity correction	greater
romanov2017	GABA_3_Crhpos_neg_Lhx6	c(W = 45898)	0.532261	-8.88565e-06	Wilcoxon rank sum test with continuity correction	greater
romanov2017	GABA_4_Crhpos_neg_Pgr15l	c(W = 46480)	0.493646	-7.29947e-05	Wilcoxon rank sum test with continuity correction	greater
romanov2017	GABA_5_Calcr_Lhx1	c(W = 59886)	0.0114518	7.54654e-05	Wilcoxon rank sum test with continuity correction	greater
romanov2017	GABA_6_Otof_Lhx1	c(W = 53621)	0.0780481	-1.54938e-06	Wilcoxon rank sum test with continuity correction	greater
romanov2017	GABA_7_Pomcpos_neg	c(W = 44483)	0.63354	-5.52002e-05	Wilcoxon rank sum test with continuity correction	greater
romanov2017	GABA_8	c(W = 46480)	0.493749	-4.07378e-05	Wilcoxon rank sum test with continuity correction	greater
romanov2017	GABA_9	c(W = 56985)	0.0395425	1.35354e-05	Wilcoxon rank sum test with continuity correction	greater
romanov2017	Gadneglow_Gnrhneg_pos	c(W = 45642)	0.564119	-2.11247e-05	Wilcoxon rank sum test with continuity correction	greater
romanov2017	Hcrt	c(W = 56320)	0.029677	2.28064e-05	Wilcoxon rank sum test with continuity correction	greater
romanov2017	Hmitpos_neg	c(W = 63291)	0.000996445	8.96075e-07	Wilcoxon rank sum test with continuity correction	greater
romanov2017	Npvf	c(W = 50568)	0.161656	-3.54207e-05	Wilcoxon rank sum test with continuity correction	greater
romanov2017	Oxytocin_1	c(W = 50388)	0.223407	-2.4778e-05	Wilcoxon rank sum test with continuity correction	greater
romanov2017	Oxytocin_2	c(W = 56686.5)	0.0112488	3.78998e-05	Wilcoxon rank sum test with continuity correction	greater
romanov2017	Oxytocin_3	c(W = 53951.5)	0.0715621	-2.83642e-05	Wilcoxon rank sum test with continuity correction	greater
romanov2017	Oxytocin_4	c(W = 58982)	0.00659117	3.59137e-05	Wilcoxon rank sum test with continuity correction	greater
romanov2017	Pmch	c(W = 52816.5)	0.0265621	3.07685e-05	Wilcoxon rank sum test with continuity correction	greater
romanov2017	Sst_1_low	c(W = 57122)	0.0254902	2.28068e-05	Wilcoxon rank sum test with continuity correction	greater
romanov2017	Sst_2_high	c(W = 51599)	0.14879	-6.26523e-05	Wilcoxon rank sum test with continuity correction	greater
romanov2017	Sst_3_medium	c(W = 57562)	0.0178107	3.18718e-05	Wilcoxon rank sum test with continuity correction	greater
romanov2017	Trh_1_low	c(W = 61260)	0.00430294	2.18773e-05	Wilcoxon rank sum test with continuity correction	greater
romanov2017	Trh_2_medium	c(W = 51624.5)	0.174136	-5.2798e-05	Wilcoxon rank sum test with continuity correction	greater
romanov2017	Trh_3_high	c(W = 59219.5)	0.00470702	3.15104e-06	Wilcoxon rank sum test with continuity correction	greater
romanov2017	Vglut2_11	c(W = 58674.5)	0.0258871	5.03e-05	Wilcoxon rank sum test with continuity correction	greater
romanov2017	Vglut2_12_Mgat4b	c(W = 52940)	0.104708	-4.04492e-05	Wilcoxon rank sum test with continuity correction	greater
romanov2017	Vglut2_13Ninl_Rfx5_Zfp346	c(W = 41051)	0.83711	-5.97598e-06	Wilcoxon rank sum test with continuity correction	greater
romanov2017	Vglut2_14_Col9a2	c(W = 42877.5)	0.779955	-1.86312e-05	Wilcoxon rank sum test with continuity correction	greater
romanov2017	Vglut2_15_Hcn1_6430411K18Rik	c(W = 54095)	0.063734	-3.76481e-05	Wilcoxon rank sum test with continuity correction	greater
romanov2017	Vglut2_2_Crhpos_neg	c(W = 59141)	0.00483843	6.03012e-05	Wilcoxon rank sum test with continuity correction	greater
romanov2017	Vglut2_3_Crhnegpos_neg_low	c(W = 62746)	0.00221435	3.6325e-05	Wilcoxon rank sum test with continuity correction	greater
romanov2017	Vglut2_4	c(W = 47926.5)	0.37909	-6.42535e-05	Wilcoxon rank sum test with continuity correction	greater
romanov2017	Vglut2_6_Prmt8_Ugdh	c(W = 50855)	0.187368	-4.84306e-05	Wilcoxon rank sum test with continuity correction	greater
romanov2017	Vglut2_7_Pgam_Snx12	c(W = 45415)	0.58384	-3.62672e-06	Wilcoxon rank sum test with continuity correction	greater
romanov2017	Vglut2_8	c(W = 55690.5)	0.019405	3.05502e-05	Wilcoxon rank sum test with continuity correction	greater
romanov2017	Vglut2_9_Gpr149	c(W = 45777)	0.555382	-6.71767e-05	Wilcoxon rank sum test with continuity correction	greater
romanov2017	astrocytes	c(W = 43758)	0.676736	-2.6237e-05	Wilcoxon rank sum test with continuity correction	greater
romanov2017	circadian_1_Vip_Grppos_neg	c(W = 47564)	0.386184	-8.23134e-05	Wilcoxon rank sum test with continuity correction	greater
romanov2017	circadian_2_Nms_VIPpos_neg	c(W = 53637)	0.0507879	-4.12105e-05	Wilcoxon rank sum test with continuity correction	greater
romanov2017	circadian_3_Per2	c(W = 46985)	0.443922	-1.63789e-05	Wilcoxon rank sum test with continuity correction	greater
romanov2017	endothelial	c(W = 41391)	0.799131	-3.00674e-05	Wilcoxon rank sum test with continuity correction	greater
romanov2017	ependymal	c(W = 38262.5)	0.902971	-3.76779e-05	Wilcoxon rank sum test with continuity correction	greater
romanov2017	microglia	c(W = 41931)	0.806974	-7.77151e-05	Wilcoxon rank sum test with continuity correction	greater
romanov2017	oligos	c(W = 35512.5)	0.96678	-7.94864e-06	Wilcoxon rank sum test with continuity correction	greater
romanov2017	vsm	c(W = 39703)	0.882705	-2.3822e-05	Wilcoxon rank sum test with continuity correction	greater
tabula_muris	Bladder.bladder_cell	c(W = 150862)	0.301455	-6.52484e-05	Wilcoxon rank sum test with continuity correction	greater
tabula_muris	Bladder.bladder_urothelial_cell	c(W = 129570)	0.788742	-2.9884e-05	Wilcoxon rank sum test with continuity correction	greater
tabula_muris	Brain_Myeloid.macrophage	c(W = 138787)	0.647558	-1.56263e-05	Wilcoxon rank sum test with continuity correction	greater
tabula_muris	Brain_Myeloid.microglial_cell	c(W = 140036)	0.584138	-5.99406e-05	Wilcoxon rank sum test with continuity correction	greater
tabula_muris	Brain_Non-Myeloid.Bergmann_glial_cell	c(W = 148765)	0.308662	-2.72475e-05	Wilcoxon rank sum test with continuity correction	greater
tabula_muris	Brain_Non-Myeloid.astrocyte	c(W = 144194.5)	0.461399	-6.28687e-06	Wilcoxon rank sum test with continuity correction	greater
tabula_muris	Brain_Non-Myeloid.brain_pericyte	c(W = 150445)	0.288783	-7.40832e-05	Wilcoxon rank sum test with continuity correction	greater
tabula_muris	Brain_Non-Myeloid.endothelial_cell	c(W = 154872)	0.189894	-3.45109e-06	Wilcoxon rank sum test with continuity correction	greater
tabula_muris	Brain_Non-Myeloid.neuron	c(W = 159261)	0.1673	-4.26343e-06	Wilcoxon rank sum test with continuity correction	greater
tabula_muris	Brain_Non-Myeloid.oligodendrocyte	c(W = 152090.5)	0.265049	-7.16018e-05	Wilcoxon rank sum test with continuity correction	greater
tabula_muris	Brain_Non-Myeloid.oligodendrocyte_precursor_cell	c(W = 171218.5)	0.041809	9.48928e-05	Wilcoxon rank sum test with continuity correction	greater
tabula_muris	Fat.B_cell	c(W = 151227)	0.216998	-1.42918e-05	Wilcoxon rank sum test with continuity correction	greater
tabula_muris	Fat.T_cell	c(W = 143111.5)	0.490232	-2.01058e-05	Wilcoxon rank sum test with continuity correction	greater
tabula_muris	Fat.endothelial_cell	c(W = 138195)	0.643745	-5.12794e-05	Wilcoxon rank sum test with continuity correction	greater
tabula_muris	Fat.mesenchymal_stem_cell_of_adipose	c(W = 144685)	0.452302	-3.26392e-05	Wilcoxon rank sum test with continuity correction	greater
tabula_muris	Fat.myeloid_cell	c(W = 125605)	0.906657	-3.53526e-06	Wilcoxon rank sum test with continuity correction	greater
tabula_muris	Fat.natural_killer_cell	c(W = 129780)	0.921594	0	Wilcoxon rank sum test with continuity correction	greater
tabula_muris	Fat.unknown_cell_type	c(W = 141401)	0.543185	-4.96532e-05	Wilcoxon rank sum test with continuity correction	greater
tabula_muris	Heart.cardiac_muscle_cell	c(W = 130061)	0.843257	-5.76184e-05	Wilcoxon rank sum test with continuity correction	greater
tabula_muris	Heart.endocardial_cell	c(W = 130022)	0.838827	-2.57038e-06	Wilcoxon rank sum test with continuity correction	greater
tabula_muris	Heart.endothelial_cell	c(W = 128962)	0.858202	-6.71989e-06	Wilcoxon rank sum test with continuity correction	greater
tabula_muris	Heart.erythrocyte	c(W = 179039.5)	0.0059173	4.76659e-06	Wilcoxon rank sum test with continuity correction	greater
tabula_muris	Heart.fibroblast	c(W = 126356)	0.862698	-5.24208e-05	Wilcoxon rank sum test with continuity correction	greater
tabula_muris	Heart.leukocyte	c(W = 130266)	0.842064	-9.29443e-06	Wilcoxon rank sum test with continuity correction	greater
tabula_muris	Heart.myofibroblast_cell	c(W = 147770.5)	0.353233	-2.24888e-05	Wilcoxon rank sum test with continuity correction	greater
tabula_muris	Heart.professional_antigen_presenting_cell	c(W = 144099)	0.461505	-2.6818e-05	Wilcoxon rank sum test with continuity correction	greater
tabula_muris	Heart.smooth_muscle_cell	c(W = 137400)	0.684629	-8.75326e-06	Wilcoxon rank sum test with continuity correction	greater
tabula_muris	Heart.unknown_cell_type	c(W = 153761)	0.148467	-2.80852e-05	Wilcoxon rank sum test with continuity correction	greater
tabula_muris	Kidney.endothelial_cell	c(W = 168469)	0.0111446	6.96409e-05	Wilcoxon rank sum test with continuity correction	greater
tabula_muris	Kidney.epithelial_cell_of_proximal_tubule	c(W = 143592.5)	0.472957	-6.4595e-05	Wilcoxon rank sum test with continuity correction	greater
tabula_muris	Kidney.kidney_collecting_duct_epithelial_cell	c(W = 159229.5)	0.0628945	-3.15696e-06	Wilcoxon rank sum test with continuity correction	greater
tabula_muris	Kidney.leukocyte	c(W = 130000)	0.919659	0	Wilcoxon rank sum test with continuity correction	greater
tabula_muris	Kidney.macrophage	c(W = 137481)	0.722445	-3.86053e-05	Wilcoxon rank sum test with continuity correction	greater
tabula_muris	Large_Intestine.Brush_cell_of_epithelium_proper_of_large_intestine	c(W = 164008)	0.0354062	1.12311e-05	Wilcoxon rank sum test with continuity correction	greater
tabula_muris	Large_Intestine.enterocyte_of_epithelium_of_large_intestine	c(W = 151357)	0.279965	-3.37031e-05	Wilcoxon rank sum test with continuity correction	greater
tabula_muris	Large_Intestine.enteroendocrine_cell	c(W = 170414.5)	0.00849123	3.41775e-05	Wilcoxon rank sum test with continuity correction	greater
tabula_muris	Large_Intestine.epithelial_cell_of_large_intestine	c(W = 130111)	0.776247	-6.68913e-05	Wilcoxon rank sum test with continuity correction	greater
tabula_muris	Large_Intestine.large_intestine_goblet_cell	c(W = 141014)	0.54461	-6.0234e-05	Wilcoxon rank sum test with continuity correction	greater
tabula_muris	Limb_Muscle.B_cell	c(W = 142494)	0.513535	-6.91461e-05	Wilcoxon rank sum test with continuity correction	greater
tabula_muris	Limb_Muscle.T_cell	c(W = 143190)	0.484482	-1.11444e-06	Wilcoxon rank sum test with continuity correction	greater
tabula_muris	Limb_Muscle.endothelial_cell	c(W = 154994)	0.144434	-2.40692e-05	Wilcoxon rank sum test with continuity correction	greater
tabula_muris	Limb_Muscle.lymphocyte	c(W = 126420)	0.945985	0	Wilcoxon rank sum test with continuity correction	greater
tabula_muris	Limb_Muscle.macrophage	c(W = 135963)	0.765512	-1.75954e-05	Wilcoxon rank sum test with continuity correction	greater
tabula_muris	Limb_Muscle.mesenchymal_stem_cell	c(W = 148191.5)	0.342491	-1.28816e-05	Wilcoxon rank sum test with continuity correction	greater
tabula_muris	Limb_Muscle.skeletal_muscle_satellite_cell	c(W = 147310)	0.367654	-3.64306e-05	Wilcoxon rank sum test with continuity correction	greater
tabula_muris	Limb_Muscle.skeletal_muscle_satellite_stem_cell	c(W = 128259)	0.892372	-3.68718e-05	Wilcoxon rank sum test with continuity correction	greater
tabula_muris	Liver.B_cell	c(W = 158794)	0.0376636	5.71559e-07	Wilcoxon rank sum test with continuity correction	greater
tabula_muris	Liver.Kupffer_cell	c(W = 152591.5)	0.136985	-5.96685e-05	Wilcoxon rank sum test with continuity correction	greater
tabula_muris	Liver.endothelial_cell_of_hepatic_sinusoid	c(W = 141998.5)	0.527675	-2.24494e-05	Wilcoxon rank sum test with continuity correction	greater
tabula_muris	Liver.hepatocyte	c(W = 115210)	0.985095	0	Wilcoxon rank sum test with continuity correction	greater
tabula_muris	Liver.natural_killer_cell	c(W = 137160)	0.696044	-3.39491e-05	Wilcoxon rank sum test with continuity correction	greater
tabula_muris	Lung.B_cell	c(W = 150117.5)	0.220464	-5.58508e-07	Wilcoxon rank sum test with continuity correction	greater
tabula_muris	Lung.T_cell	c(W = 155294)	0.103219	-3.79008e-05	Wilcoxon rank sum test with continuity correction	greater
tabula_muris	Lung.ciliated_columnar_cell_of_tracheobronchial_tree	c(W = 129312)	0.858085	-3.28696e-05	Wilcoxon rank sum test with continuity correction	greater
tabula_muris	Lung.classical_monocyte	c(W = 125030)	0.953742	0	Wilcoxon rank sum test with continuity correction	greater
tabula_muris	Lung.epithelial_cell_of_lung	c(W = 149285)	0.282931	-3.00318e-05	Wilcoxon rank sum test with continuity correction	greater
tabula_muris	Lung.leukocyte	c(W = 137971)	0.71175	-5.19648e-05	Wilcoxon rank sum test with continuity correction	greater
tabula_muris	Lung.lung_endothelial_cell	c(W = 137948)	0.647387	-2.92246e-05	Wilcoxon rank sum test with continuity correction	greater
tabula_muris	Lung.monocyte	c(W = 126530)	0.94532	0	Wilcoxon rank sum test with continuity correction	greater
tabula_muris	Lung.myeloid_cell	c(W = 124210)	0.957802	0	Wilcoxon rank sum test with continuity correction	greater
tabula_muris	Lung.natural_killer_cell	c(W = 135948.5)	0.766923	-4.40467e-05	Wilcoxon rank sum test with continuity correction	greater
tabula_muris	Lung.stromal_cell	c(W = 150317)	0.295788	-2.47917e-05	Wilcoxon rank sum test with continuity correction	greater
tabula_muris	Lung.unknown_cell_type	c(W = 136677.5)	0.741971	-3.15567e-05	Wilcoxon rank sum test with continuity correction	greater
tabula_muris	Mammary_Gland.basal_cell	c(W = 114007.5)	0.965338	-7.05236e-05	Wilcoxon rank sum test with continuity correction	greater
tabula_muris	Mammary_Gland.endothelial_cell	c(W = 142459)	0.515127	-3.66599e-05	Wilcoxon rank sum test with continuity correction	greater
tabula_muris	Mammary_Gland.luminal_epithelial_cell_of_mammary_gland	c(W = 120646)	0.923656	-7.02202e-06	Wilcoxon rank sum test with continuity correction	greater
tabula_muris	Mammary_Gland.stromal_cell	c(W = 141697)	0.533484	-6.96646e-06	Wilcoxon rank sum test with continuity correction	greater
tabula_muris	Marrow.B_cell	c(W = 140986)	0.561447	-1.17484e-05	Wilcoxon rank sum test with continuity correction	greater
tabula_muris	Marrow.Slamf1-negative_multipotent_progenitor_cell	c(W = 112639)	0.965608	-5.78394e-05	Wilcoxon rank sum test with continuity correction	greater
tabula_muris	Marrow.Slamf1-positive_multipotent_progenitor_cell	c(W = 116266)	0.949034	-7.02821e-05	Wilcoxon rank sum test with continuity correction	greater
tabula_muris	Marrow.basophil	c(W = 157192)	0.106127	-5.23162e-05	Wilcoxon rank sum test with continuity correction	greater
tabula_muris	Marrow.common_lymphoid_progenitor	c(W = 116641)	0.940334	-5.1443e-05	Wilcoxon rank sum test with continuity correction	greater
tabula_muris	Marrow.granulocyte	c(W = 154795)	0.174968	-9.81123e-06	Wilcoxon rank sum test with continuity correction	greater
tabula_muris	Marrow.granulocyte_monocyte_progenitor_cell	c(W = 107483)	0.987818	-1.89197e-05	Wilcoxon rank sum test with continuity correction	greater
tabula_muris	Marrow.granulocytopoietic_cell	c(W = 147526.5)	0.35982	-2.74204e-06	Wilcoxon rank sum test with continuity correction	greater
tabula_muris	Marrow.hematopoietic_precursor_cell	c(W = 131059)	0.766128	-5.01071e-06	Wilcoxon rank sum test with continuity correction	greater
tabula_muris	Marrow.immature_B_cell	c(W = 146178.5)	0.404823	-2.02089e-05	Wilcoxon rank sum test with continuity correction	greater
tabula_muris	Marrow.immature_NK_T_cell	c(W = 140074)	0.604986	-7.73246e-05	Wilcoxon rank sum test with continuity correction	greater
tabula_muris	Marrow.immature_T_cell	c(W = 152956)	0.168887	-4.14613e-05	Wilcoxon rank sum test with continuity correction	greater
tabula_muris	Marrow.immature_natural_killer_cell	c(W = 142556)	0.511644	-6.11536e-05	Wilcoxon rank sum test with continuity correction	greater
tabula_muris	Marrow.late_pro-B_cell	c(W = 109755)	0.983653	-7.94038e-05	Wilcoxon rank sum test with continuity correction	greater
tabula_muris	Marrow.macrophage	c(W = 125750)	0.89929	-1.12622e-05	Wilcoxon rank sum test with continuity correction	greater
tabula_muris	Marrow.mature_natural_killer_cell	c(W = 140430.5)	0.581865	-1.72538e-05	Wilcoxon rank sum test with continuity correction	greater
tabula_muris	Marrow.megakaryocyte-erythroid_progenitor_cell	c(W = 128191)	0.822814	-3.46647e-05	Wilcoxon rank sum test with continuity correction	greater
tabula_muris	Marrow.monocyte	c(W = 121664)	0.938438	-2.06046e-05	Wilcoxon rank sum test with continuity correction	greater
tabula_muris	Marrow.naive_B_cell	c(W = 149178)	0.295333	-5.30977e-06	Wilcoxon rank sum test with continuity correction	greater
tabula_muris	Marrow.pre-natural_killer_cell	c(W = 127618)	0.861111	-4.45011e-05	Wilcoxon rank sum test with continuity correction	greater
tabula_muris	Marrow.precursor_B_cell	c(W = 150525.5)	0.276259	-7.23926e-05	Wilcoxon rank sum test with continuity correction	greater
tabula_muris	Marrow.regulatory_T_cell	c(W = 136732)	0.742803	-3.69172e-06	Wilcoxon rank sum test with continuity correction	greater
tabula_muris	Pancreas.endothelial_cell	c(W = 151631)	0.223589	-5.83824e-05	Wilcoxon rank sum test with continuity correction	greater
tabula_muris	Pancreas.leukocyte	c(W = 134209)	0.803654	-1.55301e-05	Wilcoxon rank sum test with continuity correction	greater
tabula_muris	Pancreas.pancreatic_A_cell	c(W = 176771)	0.0155341	4.17274e-05	Wilcoxon rank sum test with continuity correction	greater
tabula_muris	Pancreas.pancreatic_D_cell	c(W = 174168)	0.0236455	5.09376e-05	Wilcoxon rank sum test with continuity correction	greater
tabula_muris	Pancreas.pancreatic_PP_cell	c(W = 189573)	0.000712809	6.14291e-05	Wilcoxon rank sum test with continuity correction	greater
tabula_muris	Pancreas.pancreatic_acinar_cell	c(W = 147074.5)	0.373363	-5.23191e-05	Wilcoxon rank sum test with continuity correction	greater
tabula_muris	Pancreas.pancreatic_ductal_cell	c(W = 148937.5)	0.345284	-4.87186e-05	Wilcoxon rank sum test with continuity correction	greater
tabula_muris	Pancreas.pancreatic_stellate_cell	c(W = 144088)	0.459716	-1.08258e-05	Wilcoxon rank sum test with continuity correction	greater
tabula_muris	Pancreas.type_B_pancreatic_cell	c(W = 173170)	0.0305211	4.98334e-05	Wilcoxon rank sum test with continuity correction	greater
tabula_muris	Skin.basal_cell_of_epidermis	c(W = 128721)	0.828349	-3.00716e-05	Wilcoxon rank sum test with continuity correction	greater
tabula_muris	Skin.epidermal_cell	c(W = 128269)	0.825804	-8.00626e-06	Wilcoxon rank sum test with continuity correction	greater
tabula_muris	Skin.keratinocyte_stem_cell	c(W = 137682)	0.630682	-6.24143e-06	Wilcoxon rank sum test with continuity correction	greater
tabula_muris	Skin.leukocyte	c(W = 138866)	0.643445	-6.98656e-05	Wilcoxon rank sum test with continuity correction	greater
tabula_muris	Skin.stem_cell_of_epidermis	c(W = 106870)	0.992309	-4.43632e-05	Wilcoxon rank sum test with continuity correction	greater
tabula_muris	Spleen.B_cell	c(W = 147961)	0.33771	-3.02489e-05	Wilcoxon rank sum test with continuity correction	greater
tabula_muris	Spleen.T_cell	c(W = 142074)	0.525916	-4.59482e-05	Wilcoxon rank sum test with continuity correction	greater
tabula_muris	Spleen.macrophage	c(W = 149310)	0.247925	-6.05897e-06	Wilcoxon rank sum test with continuity correction	greater
tabula_muris	Thymus.DN1_thymic_pro-T_cell	c(W = 142764)	0.502741	-3.80144e-05	Wilcoxon rank sum test with continuity correction	greater
tabula_muris	Thymus.immature_T_cell	c(W = 137087)	0.660363	-5.08188e-05	Wilcoxon rank sum test with continuity correction	greater
tabula_muris	Thymus.leukocyte	c(W = 142964)	0.494418	-3.40398e-05	Wilcoxon rank sum test with continuity correction	greater
tabula_muris	Tongue.basal_cell_of_epidermis	c(W = 133898)	0.697597	-0.00527206	Wilcoxon rank sum test with continuity correction	greater
tabula_muris	Tongue.keratinocyte	c(W = 135725)	0.672091	-6.76591e-05	Wilcoxon rank sum test with continuity correction	greater
tabula_muris	Trachea.blood_cell	c(W = 125760)	0.903524	-1.33035e-05	Wilcoxon rank sum test with continuity correction	greater
tabula_muris	Trachea.endothelial_cell	c(W = 138624)	0.629813	-6.60442e-05	Wilcoxon rank sum test with continuity correction	greater
tabula_muris	Trachea.epithelial_cell	c(W = 139615)	0.598566	-1.48023e-05	Wilcoxon rank sum test with continuity correction	greater
tabula_muris	Trachea.mesenchymal_cell	c(W = 141885)	0.524271	-6.15249e-05	Wilcoxon rank sum test with continuity correction	greater
