# Supplementary material for: Genetic mapping of etiologic brain cell types for obesity
Source: eLife. 2020 Sep 21;9:e55851. doi: 10.7554/eLife.55851 (PMC7505664; doi:10.7554/eLife.55851)
Supplement: Figure 5—source data 7. [file elife-55851-fig5-data7.xlsx]

## Sheet: Sheet 1
GWAS	Study	estimate.cor	t-statistic	P-value	Method	alternative	MinLog10_vals
BMI_UKBB_Loh2018	mousebrain	0.537621	10.3402	2.98594e-21	Pearson's product-moment correlation	Two-sided	TRUE
BMI_UKBB_Loh2018	campbell2017_lvl2	0.504257	4.59788	2.15386e-05	Pearson's product-moment correlation	two.sided	TRUE
BMI_UKBB_Loh2018	chen2017	0.392967	2.8023	0.00757852	Pearson's product-moment correlation	two.sided	TRUE
BMI_UKBB_Loh2018	romanov2017	0.301241	2.40594	0.0193388	Pearson's product-moment correlation	two.sided	TRUE
BMI_UKBB_Loh2018	mikkelsen2019	0.363184	2.49594	0.0166771	Pearson's product-moment correlation	two.sided	TRUE
BMI_UKBB_Loh2018	moffitt2018	0.598685	6.89102	9.0842e-10	Pearson's product-moment correlation	two.sided	TRUE
BMI_UKBB_Loh2018	kimVMH2019_smartseq	0.220451	1.53288	0.132154	Pearson's product-moment correlation	two.sided	TRUE
