# Supplementary material for: Genetic mapping of etiologic brain cell types for obesity
Source: eLife. 2020 Sep 21;9:e55851. doi: 10.7554/eLife.55851 (PMC7505664; doi:10.7554/eLife.55851)
Supplement: Figure 5—source data 8. [file elife-55851-fig5-data8.xlsx]

## Sheet: Sheet 1
gene	ARCME-NEURO1	ARCME-NEURO2	ARCME-NEURO3	ARCME-NEURO4	ARCME-NEURO5	ARCME-NEURO6	ARCME-NEURO7	ARCME-NEURO8	ARCME-NEURO9	ARCME-NEURO10	ARCME-NEURO11	ARCME-NEURO12	ARCME-NEURO13	ARCME-NEURO14	ARCME-NEURO15	ARCME-NEURO16	ARCME-NEURO17	ARCME-NEURO18	ARCME-NEURO19	ARCME-NEURO20	ARCME-NEURO21	ARCME-NEURO22	ARCME-NEURO23	ARCME-NEURO24	ARCME-NEURO25	ARCME-NEURO26	ARCME-NEURO27	ARCME-NEURO28	ARCME-NEURO29	ARCME-NEURO30	ARCME-NEURO31	ARCME-NEURO32	ARCME-OTHER1	ARCME-OTHER2
ENSG00000087085	0.270943	0.336819	0.184184	0.288846	0.227786	0.319852	0.197972	0.151423	0.38241	0	0.374924	0.424235	0.61738	0.397544	0.405452	0	0	0	0.024246	0.442897	0.430331	0.305828	0.440213	0.128605	0	0.474311	0.513464	0.347834	0.516893	0.106734	0	0.0934231	0.324398	0.452448
ENSG00000176697	0	0.160326	0	0	0	0	0	0	0	0	0	0	0	0	0	0.113079	0	0	0	0.110823	0.358762	0	0	0	0	0	0	0.297451	0.00667448	0.213279	0.370825	0.138594	0.0295167	0
ENSG00000174007	0.0762749	0	0.00791687	0.118624	0.0631527	0.0806067	0.102056	0.109342	0.100703	0	0.154245	0.0247531	0.254399	0.137059	0.0252281	0	0.0264184	0.137463	0	0.0407413	0.0707624	0	0	0.124145	0.0146288	0.130955	0	0	0.0624644	0	0.125127	0.0617809	0	0.0444223
ENSG00000197586	0	0	0	0.246156	0.214745	0	0	0	0.31043	0	0.0222259	0.497404	0	0.355169	0.143287	0	0	0	0.0507096	0.415593	0.372939	0.133878	0.400476	0.241609	0	0.427762	0.0870798	0.0299547	0.284582	0.359075	0.161915	0.353899	0.238893	0.295139
ENSG00000010310	0	0	0	0	0	0	0	0.342792	0	0	0.952173	0	0.0377066	0	0	0	0	0	0	0	0	0.22573	0	0	0	0	0.573093	0	0.653216	0	0	0.499561	0	0.0329978
ENSG00000130787	0	0	0	0	0	0	0	0	0	0	0	0	0	0	0	0	0	0	0	0	0	0	0	0	0	0	0	0	0	0	0	0	0	0
ENSG00000171435	0	0	0	0.302631	0	0	0.103717	0.118416	0	0.312254	0.395865	0.319468	0.177246	0.368634	0.20035	0	0.0924012	0	0.618612	0.412317	0.47147	0.433035	0.165708	0.484722	0.109498	0.453667	0.081612	0.132489	0.202202	0.0148878	0.340367	0.268444	0.0477833	0.0506972
ENSG00000116678	0	0	0	0	0	0	0	0	0	0	0.025134	0.0923469	0.0166407	0.014458	0.0711668	0	0	0	0	0	0	0	0	0	0	0	0.240308	0	0	0	0	0	0	0
ENSG00000166603	0	0	0.208035	0	0	0	0	0	0	0	0	0	0	0	0	0	0	0	0.0410866	0.062963	0.326954	0.0147491	0	0	0	0	0	0	0.163492	0	0	0.0761303	0.405796	0.134228
ENSG00000148053	0	0	-0.149584	0	0	0	-0.0818438	-0.168667	0	-0.112069	-0.182054	-0.182725	0	-0.0237832	-0.188029	0	0	0	0	0	0	0	0	-0.016474	-0.0664773	0	0	0	0	0	-0.152265	0	0	0
ENSG00000175426	0.190493	0.192207	0	0	0	0.173101	0	0	0	0.34875	0	0.361593	0.325639	0.213962	0.143392	0	0	0	0	0.129567	0.354836	0.345662	0	0	0	0	0	0.25147	0.129273	0.14945	0	0.348437	0.132389	0
ENSG00000115138	0	0	0	0	0	0	0	0	0	0	0	0	0	-0.0262066	-0.0184223	0	0	0	0	0	0.00729298	0	0	0	0	0	0	0	0	0	0	0	0	0
ENSG00000181929	0	0	0	0	0	0	0.0720515	0	0.00836161	0	0	0	0	0	0	0	0	0	0	0	0	0	0	0	0	0	0	0	0	0	0	0	0	0
ENSG00000080371	0	0	0	0	0	0	0	0	0	0.145766	0.00309158	0.103795	0.00490614	0.00408044	0	0	0	0	0	0	0.0888003	0.0923947	0	0	0	0	0	0.0560937	0	0	0	0.00274582	0	0
ENSG00000178188	0	0	0	0	0.222465	0	0	0	0	0	0	0	0	0	0	0	0	0	0	0	0.014193	0	0	0	0	0	0	0	0	0	0	0	0	0
ENSG00000112246	0	0	0	0	0	0.00900449	0	0	0	0	0.0598022	0	0	0	0.0289924	0	0	0.127204	0	0	0	0	0	0	0	0	0	0	0	0.100626	0	0	0.0183709	0.108564
ENSG00000140836	0.104324	0.0747332	0	0.206306	0	0	0.139535	0	0	0	0	0.277538	-0.00450881	0.015666	0.0493158	0.0704526	0	0	0.111029	0.0938397	0.0488552	0.173814	0	0	0	0	0	0	0	0	0	0.093363	0.0823588	0.190831
ENSG00000105278	0	0.146446	0	0.437622	0.161201	0	0	0.0201068	0.0484731	0.328322	0	0	0.38981	0	0.172754	0	0	0	0	0	0.0809039	0.0562539	0	0.101464	0	0.321113	0	0.0181347	0.147727	0.0826844	0.123834	0.115092	0	0
