# Supplementary material for: Genetic mapping of etiologic brain cell types for obesity
Source: eLife. 2020 Sep 21;9:e55851. doi: 10.7554/eLife.55851 (PMC7505664; doi:10.7554/eLife.55851)
Supplement: Figure 5—source data 9. [file elife-55851-fig5-data9.xlsx]

## Sheet: Sheet 1
Gene symbol	Ensemble gene ID	Campbell (lvl2)	Mouse Nervous System	Tabula Muris
Bdnf	ENSG00000176697	8	55	7
Cep19	ENSG00000174007	0	34	NA
Ksr2	ENSG00000171435	10	62	9
Lep	ENSG00000174697	NA	1	NA
Lepr	ENSG00000116678	7	19	10
Mc4r	ENSG00000166603	6	38	4
Ntrk2	ENSG00000148053	2	22	12
Pcsk1	ENSG00000175426	16	58	7
Pomc	ENSG00000115138	3	21	6
Sh2b1	ENSG00000178188	0	1	1
Sim1	ENSG00000112246	5	8	7
Wnt10b	ENSG00000169884	NA	20	10
Zbtb7b	ENSG00000160685	NA	NA	NA
Ache	ENSG00000087085	21	119	9
Rapgef3	ENSG00000079337	NA	19	13
Prkag1	ENSG00000181929	0	0	0
Rab21	ENSG00000080371	0	20	1
Hip1r	ENSG00000130787	3	11	6
Zfhx3	ENSG00000140836	11	69	5
Gipr	ENSG00000010310	7	24	6
Entpd6	ENSG00000197586	12	39	4
Zfr2	ENSG00000105278	3	19	12
Znf169	ENSG00000175787	NA	17	2
