# Supplementary material for: Genetic mapping of etiologic brain cell types for obesity
Source: eLife. 2020 Sep 21;9:e55851. doi: 10.7554/eLife.55851 (PMC7505664; doi:10.7554/eLife.55851)
Supplement: Figure 5—source data 10. [file elife-55851-fig5-data10.xlsx]

## Sheet: Sheet1
Annotation	Tissue	Tissue (sub)
whole_blood	Blood	Whole Blood
brain_frontal_cortex_ba9	Brain	Brain - Frontal Cortex (BA9)
adipose_subcutaneous	Adipose Tissue	Adipose - Subcutaneous
muscle_skeletal	Muscle	Muscle - Skeletal
artery_tibial	Blood Vessel	Artery - Tibial
artery_coronary	Blood Vessel	Artery - Coronary
heart_atrial_appendage	Heart	Heart - Atrial Appendage
adipose_visceral_omentum	Adipose Tissue	Adipose - Visceral (Omentum)
ovary	Ovary	Ovary
uterus	Uterus	Uterus
vagina	Vagina	Vagina
breast_mammary_tissue	Breast	Breast - Mammary Tissue
skin_not_sun_exposed_suprapubic	Skin	Skin - Not Sun Exposed (Suprapubic)
minor_salivary_gland	Salivary Gland	Minor Salivary Gland
brain_cortex	Brain	Brain - Cortex
adrenal_gland	Adrenal Gland	Adrenal Gland
thyroid	Thyroid	Thyroid
lung	Lung	Lung
spleen	Spleen	Spleen
pancreas	Pancreas	Pancreas
esophagus_muscularis	Esophagus	Esophagus - Muscularis
esophagus_mucosa	Esophagus	Esophagus - Mucosa
esophagus_gastroesophageal_junction	Esophagus	Esophagus - Gastroesophageal Junction
stomach	Stomach	Stomach
colon_sigmoid	Colon	Colon - Sigmoid
small_intestine_terminal_ileum	Small Intestine	Small Intestine - Terminal Ileum
colon_transverse	Colon	Colon - Transverse
prostate	Prostate	Prostate
testis	Testis	Testis
skin_sun_exposed_lower_leg	Skin	Skin - Sun Exposed (Lower leg)
nerve_tibial	Nerve	Nerve - Tibial
heart_left_ventricle	Heart	Heart - Left Ventricle
pituitary	Pituitary	Pituitary
brain_cerebellum	Brain	Brain - Cerebellum
cells_cultured_fibroblasts	Skin	Cells - Cultured fibroblasts
artery_aorta	Blood Vessel	Artery - Aorta
cells_ebv_transformed_lymphocytes	Blood	Cells - EBV-transformed lymphocytes
brain_cerebellar_hemisphere	Brain	Brain - Cerebellar Hemisphere
brain_caudate_basal_ganglia	Brain	Brain - Caudate (basal ganglia)
brain_nucleus_accumbens_basal_ganglia	Brain	Brain - Nucleus accumbens (basal ganglia)
brain_putamen_basal_ganglia	Brain	Brain - Putamen (basal ganglia)
brain_hypothalamus	Brain	Brain - Hypothalamus
brain_spinal_cord_cervical_c_1	Brain	Brain - Spinal cord (cervical c-1)
liver	Liver	Liver
brain_hippocampus	Brain	Brain - Hippocampus
brain_anterior_cingulate_cortex_ba24	Brain	Brain - Anterior cingulate cortex (BA24)
brain_substantia_nigra	Brain	Brain - Substantia nigra
kidney_cortex	Kidney	Kidney - Cortex
brain_amygdala	Brain	Brain - Amygdala
cervix_ectocervix	Cervix Uteri	Cervix - Ectocervix
fallopian_tube	Fallopian Tube	Fallopian Tube
cervix_endocervix	Cervix Uteri	Cervix - Endocervix
bladder	Bladder	Bladder
kidney_medulla	Kidney	Kidney - Medulla
cells_leukemia_cell_line_cml	Bone Marrow	Cells - Leukemia cell line (CML)
