# Supplementary material for: Genetic mapping of etiologic brain cell types for obesity
Source: eLife. 2020 Sep 21;9:e55851. doi: 10.7554/eLife.55851 (PMC7505664; doi:10.7554/eLife.55851)
Supplement: Figure 5—source data 11. [file elife-55851-fig5-data11.xlsx]

## Sheet: Sheet 1
GWAS	Cell types	Cell type annotation	Beta	Beta se	P-value
BMI_UKBB_Loh2018	gtex_v8_filtered_normLog_all	brain_cerebellum	2.67551160174e-08	7.3266471805e-09	0.000130227460642
BMI_UKBB_Loh2018	gtex_v8_filtered_normLog_all	brain_amygdala	3.13737008021e-08	9.12730021911e-09	0.000293720918199
BMI_UKBB_Loh2018	gtex_v8_filtered_normLog_all	brain_frontal_cortex_ba9	3.25297217306e-08	9.47870831299e-09	0.000299714260589
BMI_UKBB_Loh2018	gtex_v8_filtered_normLog_all	brain_anterior_cingulate_cortex_ba24	3.15915817902e-08	9.60038459122e-09	0.000499766866342
BMI_UKBB_Loh2018	gtex_v8_filtered_normLog_all	brain_hippocampus	2.20358719477e-08	6.93095572598e-09	0.000738051547427
BMI_UKBB_Loh2018	gtex_v8_filtered_normLog_all	brain_nucleus_accumbens_basal_ganglia	2.41156849659e-08	8.6067836801e-09	0.00253982193967
BMI_UKBB_Loh2018	gtex_v8_filtered_normLog_all	brain_hypothalamus	2.44180083153e-08	8.98143631475e-09	0.00327675536101
BMI_UKBB_Loh2018	gtex_v8_filtered_normLog_all	brain_caudate_basal_ganglia	2.38864387975e-08	9.19936308684e-09	0.00470850941424
BMI_UKBB_Loh2018	gtex_v8_filtered_normLog_all	brain_putamen_basal_ganglia	2.36701698866e-08	9.46885913302e-09	0.00621332776113
BMI_UKBB_Loh2018	gtex_v8_filtered_normLog_brain	brain_anterior_cingulate_cortex_ba24	2.02925791183e-08	9.6789119997e-09	0.0180155421771
BMI_UKBB_Loh2018	gtex_v8_filtered_normLog_all	brain_substantia_nigra	1.67990769446e-08	8.13630302764e-09	0.0194753942674
BMI_UKBB_Loh2018	gtex_v8_filtered_normLog_brain	brain_frontal_cortex_ba9	2.21239497837e-08	1.08769097746e-08	0.0209743364021
BMI_UKBB_Loh2018	gtex_v8_filtered_normLog_brain	brain_cortex	1.72573901165e-08	1.18250624441e-08	0.0722287560663
BMI_UKBB_Loh2018	gtex_v8_filtered_normLog_all	brain_spinal_cord_cervical_c_1	7.196597128e-09	6.30968941369e-09	0.127025949141
BMI_UKBB_Loh2018	gtex_v8_filtered_normLog_all	pituitary	5.66284452147e-09	5.81110627416e-09	0.164907523438
BMI_UKBB_Loh2018	gtex_v8_filtered_normLog_brain	brain_cerebellum	8.99661890778e-09	1.07510750127e-08	0.201349378537
BMI_UKBB_Loh2018	gtex_v8_filtered_normLog_brain	brain_amygdala	8.73698989282e-09	1.15830196419e-08	0.225336671556
BMI_UKBB_Loh2018	gtex_v8_filtered_normLog_brain	brain_cerebellar_hemisphere	5.12159659825e-09	9.64155272765e-09	0.297639960329
BMI_UKBB_Loh2018	gtex_v8_filtered_normLog_all	esophagus_gastroesophageal_junction	7.23541302883e-09	1.39299494175e-08	0.301735978156
BMI_UKBB_Loh2018	gtex_v8_filtered_normLog_all	pancreas	2.88950506282e-09	5.86012467838e-09	0.310978345244
BMI_UKBB_Loh2018	gtex_v8_filtered_normLog_all	esophagus_muscularis	3.03659547127e-09	1.01573791777e-08	0.382487333993
BMI_UKBB_Loh2018	gtex_v8_filtered_normLog_all	nerve_tibial	1.78847587791e-09	6.8806979838e-09	0.397460227318
BMI_UKBB_Loh2018	gtex_v8_filtered_normLog_all	ovary	4.40270424105e-10	8.56617740603e-09	0.479504838606
BMI_UKBB_Loh2018	gtex_v8_filtered_normLog_brain	brain_putamen_basal_ganglia	-9.19681866034e-10	1.20076646338e-08	0.530525634111
BMI_UKBB_Loh2018	gtex_v8_filtered_normLog_brain	brain_hypothalamus	-1.83233512476e-09	9.37963108927e-09	0.57744153116
BMI_UKBB_Loh2018	gtex_v8_filtered_normLog_all	spleen	-3.09585036738e-09	1.18954161542e-08	0.602666745675
BMI_UKBB_Loh2018	gtex_v8_filtered_normLog_brain	brain_caudate_basal_ganglia	-4.52407942734e-09	1.24192836701e-08	0.642175015577
BMI_UKBB_Loh2018	gtex_v8_filtered_normLog_all	artery_aorta	-3.45084330492e-09	6.24275547211e-09	0.709791482882
BMI_UKBB_Loh2018	gtex_v8_filtered_normLog_brain	brain_nucleus_accumbens_basal_ganglia	-6.48788464356e-09	9.21946473081e-09	0.759195166183
BMI_UKBB_Loh2018	gtex_v8_filtered_normLog_all	heart_atrial_appendage	-5.27655797164e-09	5.63665237832e-09	0.825393152579
BMI_UKBB_Loh2018	gtex_v8_filtered_normLog_all	colon_sigmoid	-7.77005422285e-09	7.94608434323e-09	0.835924983269
BMI_UKBB_Loh2018	gtex_v8_filtered_normLog_all	uterus	-1.2725174701e-08	1.19415353839e-08	0.85670294996
BMI_UKBB_Loh2018	gtex_v8_filtered_normLog_all	artery_tibial	-6.52676392044e-09	5.29752452877e-09	0.891032992216
BMI_UKBB_Loh2018	gtex_v8_filtered_normLog_all	heart_left_ventricle	-9.01886465661e-09	7.02379583268e-09	0.90043676363
BMI_UKBB_Loh2018	gtex_v8_filtered_normLog_brain	brain_hippocampus	-1.31692308464e-08	9.58778688226e-09	0.915208089751
BMI_UKBB_Loh2018	gtex_v8_filtered_normLog_all	fallopian_tube	-1.36732937593e-08	9.72618121067e-09	0.920111723619
BMI_UKBB_Loh2018	gtex_v8_filtered_normLog_all	stomach	-9.50026928145e-09	6.28362342205e-09	0.934721543066
BMI_UKBB_Loh2018	gtex_v8_filtered_normLog_all	cervix_endocervix	-1.80651819108e-08	1.06854442407e-08	0.954546695378
BMI_UKBB_Loh2018	gtex_v8_filtered_normLog_all	adrenal_gland	-1.04926813343e-08	5.37072120562e-09	0.974630581707
BMI_UKBB_Loh2018	gtex_v8_filtered_normLog_all	muscle_skeletal	-1.01054176112e-08	4.56215528178e-09	0.986621800598
BMI_UKBB_Loh2018	gtex_v8_filtered_normLog_all	liver	-1.27524005062e-08	5.46685332122e-09	0.990167435885
BMI_UKBB_Loh2018	gtex_v8_filtered_normLog_all	small_intestine_terminal_ileum	-1.8676245884e-08	7.66822990191e-09	0.992565116577
BMI_UKBB_Loh2018	gtex_v8_filtered_normLog_all	testis	-1.38068762904e-08	5.63000247328e-09	0.992904162541
BMI_UKBB_Loh2018	gtex_v8_filtered_normLog_all	cervix_ectocervix	-2.39422245071e-08	9.74145547788e-09	0.993009801159
BMI_UKBB_Loh2018	gtex_v8_filtered_normLog_all	skin_sun_exposed_lower_leg	-1.34656783587e-08	5.30755203076e-09	0.994410912372
BMI_UKBB_Loh2018	gtex_v8_filtered_normLog_all	artery_coronary	-1.83224030913e-08	7.1098430814e-09	0.995017586695
BMI_UKBB_Loh2018	gtex_v8_filtered_normLog_all	kidney_cortex	-1.88074452261e-08	6.97666887865e-09	0.996488618401
BMI_UKBB_Loh2018	gtex_v8_filtered_normLog_all	whole_blood	-1.58086489485e-08	5.69554904559e-09	0.997245125905
BMI_UKBB_Loh2018	gtex_v8_filtered_normLog_all	prostate	-2.14835035723e-08	7.6376595744e-09	0.997544685287
BMI_UKBB_Loh2018	gtex_v8_filtered_normLog_all	cells_cultured_fibroblasts	-1.56174418697e-08	5.5020911631e-09	0.997733379225
BMI_UKBB_Loh2018	gtex_v8_filtered_normLog_all	kidney_medulla	-3.20185894844e-08	1.08175498965e-08	0.998461177783
BMI_UKBB_Loh2018	gtex_v8_filtered_normLog_all	adipose_subcutaneous	-1.91045816168e-08	6.21113483485e-09	0.998950518371
BMI_UKBB_Loh2018	gtex_v8_filtered_normLog_brain	brain_substantia_nigra	-2.71363649369e-08	8.74864309281e-09	0.999038195249
BMI_UKBB_Loh2018	gtex_v8_filtered_normLog_all	skin_not_sun_exposed_suprapubic	-1.60474138261e-08	5.13867005899e-09	0.999104524858
BMI_UKBB_Loh2018	gtex_v8_filtered_normLog_all	minor_salivary_gland	-1.90692202798e-08	6.07296040443e-09	0.999155319991
BMI_UKBB_Loh2018	gtex_v8_filtered_normLog_all	bladder	-3.0558995637e-08	9.71187212981e-09	0.999173985304
BMI_UKBB_Loh2018	gtex_v8_filtered_normLog_all	breast_mammary_tissue	-2.72467661746e-08	7.98706826626e-09	0.999676801714
BMI_UKBB_Loh2018	gtex_v8_filtered_normLog_all	thyroid	-2.10130225301e-08	5.74389010058e-09	0.999873066001
BMI_UKBB_Loh2018	gtex_v8_filtered_normLog_all	colon_transverse	-2.46338790493e-08	6.65480152014e-09	0.999892907456
BMI_UKBB_Loh2018	gtex_v8_filtered_normLog_all	cells_ebv_transformed_lymphocytes	-2.59653783094e-08	6.95402961795e-09	0.999905716615
BMI_UKBB_Loh2018	gtex_v8_filtered_normLog_all	adipose_visceral_omentum	-2.66880546421e-08	6.37924510901e-09	0.999985652024
BMI_UKBB_Loh2018	gtex_v8_filtered_normLog_all	esophagus_mucosa	-2.02314924561e-08	4.60856827134e-09	0.999994331776
BMI_UKBB_Loh2018	gtex_v8_filtered_normLog_all	vagina	-3.56029729949e-08	8.04078206591e-09	0.999995240039
BMI_UKBB_Loh2018	gtex_v8_filtered_normLog_all	lung	-2.85182247175e-08	5.49610524137e-09	0.999999894177
BMI_UKBB_Loh2018	gtex_v8_filtered_normLog_brain	brain_spinal_cord_cervical_c_1	-4.05123764718e-08	7.53152303617e-09	0.999999962558
BMI_UKBB_Loh2018	gtex_v8_filtered_normLog_all	brain_cortex	3.02180569958e-08	7.44866114068e-09	2.4870129804e-05
BMI_UKBB_Loh2018	gtex_v8_filtered_normLog_all	brain_cerebellar_hemisphere	2.69539435609e-08	6.21668313618e-09	7.26341279216e-06
