# Supplementary material for: Genetic mapping of etiologic brain cell types for obesity
Source: eLife. 2020 Sep 21;9:e55851. doi: 10.7554/eLife.55851 (PMC7505664; doi:10.7554/eLife.55851)
Supplement: Figure 5—source data 12. [file elife-55851-fig5-data12.xlsx]

## Sheet: Sheet 1
Tissue annotation	Statistic	P-value	Conf. low	conf.high	Method	Alternative
brain_hypothalamus	c(W = 718674.5)	0.000385538	8.39577e-07	#NUM!	Wilcoxon rank sum test with continuity correction	greater
brain_substantia_nigra	c(W = 688543)	0.000773987	6.13571e-05	#NUM!	Wilcoxon rank sum test with continuity correction	greater
brain_frontal_cortex_ba9	c(W = 687553)	0.00207811	4.08177e-05	#NUM!	Wilcoxon rank sum test with continuity correction	greater
brain_hippocampus	c(W = 682971)	0.00321033	6.56165e-06	#NUM!	Wilcoxon rank sum test with continuity correction	greater
brain_anterior_cingulate_cortex_ba24	c(W = 680331)	0.00322907	5.23476e-05	#NUM!	Wilcoxon rank sum test with continuity correction	greater
brain_cortex	c(W = 658355)	0.0161485	4.40449e-06	#NUM!	Wilcoxon rank sum test with continuity correction	greater
brain_amygdala	c(W = 640237)	0.017495	5.72963e-05	#NUM!	Wilcoxon rank sum test with continuity correction	greater
pituitary	c(W = 658512)	0.0181143	5.70943e-05	#NUM!	Wilcoxon rank sum test with continuity correction	greater
brain_nucleus_accumbens_basal_ganglia	c(W = 645422)	0.0182923	8.21753e-05	#NUM!	Wilcoxon rank sum test with continuity correction	greater
brain_putamen_basal_ganglia	c(W = 641746)	0.0188255	7.46406e-06	#NUM!	Wilcoxon rank sum test with continuity correction	greater
kidney_medulla	c(W = 635581)	0.0257255	2.42462e-05	#NUM!	Wilcoxon rank sum test with continuity correction	greater
brain_caudate_basal_ganglia	c(W = 638283)	0.0270952	4.18292e-05	#NUM!	Wilcoxon rank sum test with continuity correction	greater
heart_atrial_appendage	c(W = 631776)	0.0303109	1.86987e-05	#NUM!	Wilcoxon rank sum test with continuity correction	greater
pancreas	c(W = 634235)	0.0306646	8.15524e-06	#NUM!	Wilcoxon rank sum test with continuity correction	greater
artery_tibial	c(W = 623388)	0.0346269	2.32914e-05	#NUM!	Wilcoxon rank sum test with continuity correction	greater
brain_spinal_cord_cervical_c_1	c(W = 624441.5)	0.0398342	6.09103e-05	#NUM!	Wilcoxon rank sum test with continuity correction	greater
adipose_subcutaneous	c(W = 615209)	0.0507728	-9.33716e-06	#NUM!	Wilcoxon rank sum test with continuity correction	greater
minor_salivary_gland	c(W = 618825.5)	0.0649771	-2.4225e-06	#NUM!	Wilcoxon rank sum test with continuity correction	greater
breast_mammary_tissue	c(W = 608319)	0.0984904	-2.99215e-05	#NUM!	Wilcoxon rank sum test with continuity correction	greater
artery_coronary	c(W = 596996)	0.0998927	-3.93271e-05	#NUM!	Wilcoxon rank sum test with continuity correction	greater
heart_left_ventricle	c(W = 589420)	0.114909	-9.24077e-05	#NUM!	Wilcoxon rank sum test with continuity correction	greater
stomach	c(W = 590428)	0.12839	-3.12716e-06	#NUM!	Wilcoxon rank sum test with continuity correction	greater
brain_cerebellar_hemisphere	c(W = 589833)	0.145176	-3.47708e-05	#NUM!	Wilcoxon rank sum test with continuity correction	greater
small_intestine_terminal_ileum	c(W = 575973.5)	0.210576	-3.95329e-05	#NUM!	Wilcoxon rank sum test with continuity correction	greater
brain_cerebellum	c(W = 574411)	0.224307	-5.10043e-05	#NUM!	Wilcoxon rank sum test with continuity correction	greater
prostate	c(W = 568015)	0.271882	-1.5308e-05	#NUM!	Wilcoxon rank sum test with continuity correction	greater
muscle_skeletal	c(W = 560995)	0.284537	-5.06723e-05	#NUM!	Wilcoxon rank sum test with continuity correction	greater
cells_cultured_fibroblasts	c(W = 561214)	0.290861	-3.97119e-05	#NUM!	Wilcoxon rank sum test with continuity correction	greater
artery_aorta	c(W = 553634)	0.308934	-2.08665e-05	#NUM!	Wilcoxon rank sum test with continuity correction	greater
thyroid	c(W = 560874)	0.309783	-3.6457e-05	#NUM!	Wilcoxon rank sum test with continuity correction	greater
esophagus_gastroesophageal_junction	c(W = 545498)	0.386719	-3.8791e-05	#NUM!	Wilcoxon rank sum test with continuity correction	greater
colon_transverse	c(W = 542507)	0.421164	-3.0152e-05	#NUM!	Wilcoxon rank sum test with continuity correction	greater
spleen	c(W = 535140)	0.471058	-1.91292e-05	#NUM!	Wilcoxon rank sum test with continuity correction	greater
colon_sigmoid	c(W = 532310.5)	0.489378	-5.7816e-05	#NUM!	Wilcoxon rank sum test with continuity correction	greater
esophagus_muscularis	c(W = 530617)	0.503148	-5.26418e-05	#NUM!	Wilcoxon rank sum test with continuity correction	greater
adipose_visceral_omentum	c(W = 529934)	0.507971	-1.27899e-05	#NUM!	Wilcoxon rank sum test with continuity correction	greater
skin_sun_exposed_lower_leg	c(W = 528025)	0.520629	-1.42246e-05	#NUM!	Wilcoxon rank sum test with continuity correction	greater
skin_not_sun_exposed_suprapubic	c(W = 524573)	0.543997	-1.7468e-05	#NUM!	Wilcoxon rank sum test with continuity correction	greater
kidney_cortex	c(W = 523129)	0.561654	-4.87978e-06	#NUM!	Wilcoxon rank sum test with continuity correction	greater
cervix_ectocervix	c(W = 521385)	0.596327	-3.95955e-05	#NUM!	Wilcoxon rank sum test with continuity correction	greater
adrenal_gland	c(W = 516060)	0.604443	-4.39947e-05	#NUM!	Wilcoxon rank sum test with continuity correction	greater
cervix_endocervix	c(W = 515062)	0.620966	-5.5212e-05	#NUM!	Wilcoxon rank sum test with continuity correction	greater
whole_blood	c(W = 515479)	0.636814	-5.56568e-05	#NUM!	Wilcoxon rank sum test with continuity correction	greater
nerve_tibial	c(W = 508747.5)	0.642976	-0.00464218	#NUM!	Wilcoxon rank sum test with continuity correction	greater
vagina	c(W = 506177.5)	0.661751	-3.08966e-05	#NUM!	Wilcoxon rank sum test with continuity correction	greater
bladder	c(W = 499890)	0.715095	-5.72588e-05	#NUM!	Wilcoxon rank sum test with continuity correction	greater
lung	c(W = 491409.5)	0.746662	-0.00663375	#NUM!	Wilcoxon rank sum test with continuity correction	greater
esophagus_mucosa	c(W = 476286)	0.840663	-4.43079e-05	#NUM!	Wilcoxon rank sum test with continuity correction	greater
liver	c(W = 480768)	0.848743	-5.99898e-06	#NUM!	Wilcoxon rank sum test with continuity correction	greater
cells_ebv_transformed_lymphocytes	c(W = 472767)	0.853916	-9.68395e-06	#NUM!	Wilcoxon rank sum test with continuity correction	greater
fallopian_tube	c(W = 469142)	0.873609	-7.16854e-06	#NUM!	Wilcoxon rank sum test with continuity correction	greater
ovary	c(W = 468693)	0.876358	-3.25654e-05	#NUM!	Wilcoxon rank sum test with continuity correction	greater
uterus	c(W = 454028)	0.914283	-6.23193e-05	#NUM!	Wilcoxon rank sum test with continuity correction	greater
testis	c(W = 355221)	0.997194	-0.133913	#NUM!	Wilcoxon rank sum test with continuity correction	greater
